# Supplementary material for: Many lncRNAs, 5’UTRs, and pseudogenes are translated and some are likely to express functional proteins
Source: eLife journal article supplement (doi:10.7554/elife.08890), 2015-12-19
Supplement: supp [file elife-08890-supp-v1.zip]

Archive with 16 entries (16 files):
- elife_poa_e08890_Supplementary_File_2.xlsx
- elife_poa_e08890_Figure_7_figure_supplement_1.pdf
- elife_poa_e08890_Figure_1_figures_supplement_1.pdf
- elife_poa_e08890_Figure_4_figure_supplement_1.pdf
- elife_poa_e08890_Figure_6_figure_supplement_1.pdf
- elife_poa_e08890_Figure_4_figure_supplement_5.pdf
- elife_poa_e08890_Figure_4_figure_supplement_2.pdf
- elife_poa_e08890_Supplementary_File_1.xlsx
- elife_poa_e08890_Figure_3_figure_supplement_1.pdf
- elife_poa_e08890_Figure_4_figure_supplement_6.pdf
- elife_poa_e08890_Figure_2_figure_supplement_2.pdf
- elife_poa_e08890_Supplementary_File_3.xlsx
- elife_poa_e08890_Figure_2_figure_supplement_1.pdf
- elife_poa_e08890_Figure_4_figure_supplement_3.pdf
- elife_poa_e08890_Figure_7_figure_supplement_2.pdf
- elife_poa_e08890_Figure_4_figure_supplement_4.pdf
