# Supplementary material for: Many lncRNAs, 5’UTRs, and pseudogenes are translated and some are likely to express functional proteins
Source: eLife journal article supplement (doi:10.7554/elife.08890), 2015-12-19
Supplement: supp [file elife-08890-supp-v1.zip › elife_poa_e08890_Figure_7_figure_supplement_2.pdf]

## Figure 7-figure supplement 2

**A**

uORF (HR:NM\_005144:chr8:-:344:448) Ka/Ks=0.070

Human MAQPTASAQKLVRPIRAVCRILQIPESDPSNLRP

Mouse MAQPTALAQKLVRPIRAVCRILQIPESDPSNLRP

\*\*\*\*\*

**B**

uORF (SLC35A4:NM\_080670:chr5:+:9:320) Ka/Ks=0.122

Human MADDKDSLPLKDLAFLKNQLESQRREDEVNSGVGQDGSLLSPFLKGFLA

Mouse MADDKDSLPLKDLTFLKNQLERLQQRVEGEVNSGVGQDGSLLSPFFKGFLA

\*\*\*\*\*

GYVAKLRASAVLGFVGTCTGIYAAQAYAVPNVEKTLRDYLQLLRKGPD

GYVAKLRASAVLGFVGTCTGIYAAQAYAVPNVEKALKNYFRSLRKGPD

\*\*\*\*\*

**C**

uORF (FAM220A:NM\_001037163:chr7:-:201:407) Ka/Ks=0.246

Human MAAALSGLAVRLSRSAARSYGVFCKGLTRTLIFFDLAWRLRINFPYLYIVASMMMLNVRLQVHIEIH

Mouse MATAALSGLAVRLSRSAARSYGVFCKGLTRTLIFFDLAWRLRINFPYLYIVASMMMLNVRLQVVVEEE

\*\*\*\*\*

**D**

uORF (MKKS:NM\_018848:chr20:-:263:454) Ka/Ks=0.268

Human MSLRNLWRDYKVLVVMVPLVGLIHLGWYRIKSSPVFQIPKNDDIPEQDSLGLSNLQKSQIQGK

Mouse MSFQNLWREYKVLVVMVPLIGFIHLGWYRIKSSPVFQVPK-DDTTELDLGLASPPKSQT---

\*\*\*\*\*

**E**

uORF (CHST2:NM\_004267:chr3:+:787:939) Ka/Ks=0.306

Human MGEPALGAGDQ---PPRPPRSRGPSPGASSQPAASPSRAAGLPPPPRRRPGCLCL

Mouse MGEPALGAGDQQLPPRPPRIGGPSPGARSRPAASPSWAAGPPPPRRRPRCLCL

\*\*\*\*\*

**F**

uORF (R3HDM1:NM\_015361:chr2:+:195:347) Ka/Ks=0.340

Human MGLLLPDYRWFTTVDILADNCEKEPWILFYFCGTPQSQIQRTHQASSSL

Mouse MGLLPDYCWFNFTDILADNCEEPWVILFYFCGTPQSQIHRTHQASSSL

\*\*\*\*\*

**G**

uORF (DDR2:NM\_001014796:chr1:+:222:356) Ka/Ks=0.403

Human LGFSALESSKVCGLNYSKEAEIIEEKQRPVAFEDPAPQRMLCTR

Mouse LTFGALEHSKACCLT-SKEAEIIEERGSPSVSKDSVLQRMFCTL

\*\*\*\*\*
