# Supplementary material for: Many lncRNAs, 5’UTRs, and pseudogenes are translated and some are likely to express functional proteins
Source: eLife journal article supplement (doi:10.7554/elife.08890), 2015-12-19
Supplement: supp [file elife-08890-supp-v1.zip › elife_poa_e08890_Supplementary_File_1.xlsx]

## Sheet: lncRNA
A1BG-AS1	ENSG00000268895.1:ENST00000593374.1:chr19:+:327:608	chr19	+	58865159	58865441	58865159	58865441	1	58865159,	58865441,
A1BG-AS1	ENSG00000268895.1:ENST00000593374.1:chr19:+:705:953	chr19	+	58865537	58865786	58865537	58865786	1	58865537,	58865786,
APCDD1L-AS1	APCDD1L-AS1:NR_034147:chr20:+:169:330	chr20	+	57090603	57090765	57090603	57090765	1	57090603,	57090765,
ARHGAP5-AS1	ARHGAP5-AS1:NR_027263:chr14:-:551:721	chr14	-	32545183	32545354	32545183	32545354	1	32545183,	32545354,
ASB16-AS1	ASB16-AS1:NR_049729:chr17:-:1614:1748	chr17	-	42253850	42253985	42253850	42253985	1	42253850,	42253985,
ASB16-AS1	ASB16-AS1:NR_049729:chr17:-:780:1028	chr17	-	42254570	42254819	42254570	42254819	1	42254570,	42254819,
ASB16-AS1	ENSG00000267080.1:ENST00000585457.1:chr17:-:30:356	chr17	-	42259002	42264009	42259002	42264009	3	42259002,42260297,42263932,	42259088,42260461,42264009,
ATP1A1OS	ATP1A1OS:NR_024124:chr1:-:375:662	chr1	-	116948224	116948512	116948224	116948512	1	116948224,	116948512,
ATP6V0E2-AS1	ATP6V0E2-AS1:NR_027040:chr7:-:339:617	chr7	-	149570333	149570612	149570333	149570612	1	149570333,	149570612,
BAIAP2-AS1	BAIAP2-AS1:NR_026857:chr17:-:295:480	chr17	-	79006872	79007058	79006872	79007058	1	79006872,	79007058,
BOLA3-AS1	BOLA3-AS1:NR_045634:chr2:+:296:394	chr2	+	74375403	74375502	74375403	74375502	1	74375403,	74375502,
C14orf64	C14orf64:NR_015430:chr14:-:181:315	chr14	-	98435716	98435851	98435716	98435851	1	98435716,	98435851,
C14orf64	XLOC_011117:TCONS_00022383:chr14:-:142:336	chr14	-	98435618	98444319	98435618	98444319	2	98435618,98444313,	98435807,98444319,
C14orf64	C14orf64:NR_015430:chr14:-:142:171	chr14	-	98435860	98444319	98435860	98444319	2	98435860,98444313,	98435884,98444319,
C14orf64	XLOC_011117:TCONS_00022383:chr14:-:104:238	chr14	-	98435716	98444357	98435716	98444357	2	98435716,98444313,	98435807,98444357,
C15orf37	C15orf37:NR_028330:chr15:+:591:833	chr15	+	80215703	80215946	80215703	80215946	1	80215703,	80215946,
C17orf76-AS1	ENSG00000175061.13:ENST00000497774.1:chr17:+:44:193	chr17	+	16342368	16342784	16342368	16342784	2	16342368,16342640,	16342374,16342784,
C17orf76-AS1	C17orf76-AS1:NR_027163:chr17:+:68:187	chr17	+	16342368	16342867	16342368	16342867	3	16342368,16342640,16342841,	16342374,16342728,16342867,
C17orf76-AS1	C17orf76-AS1:NR_027164:chr17:+:68:184	chr17	+	16342368	16342917	16342368	16342917	3	16342368,16342640,16342894,	16342374,16342728,16342917,
C17orf76-AS1	C17orf76-AS1:NR_027165:chr17:+:68:187	chr17	+	16342368	16342999	16342368	16342999	3	16342368,16342640,16342973,	16342374,16342728,16342999,
C17orf76-AS1	C17orf76-AS1:NR_045029:chr17:+:68:196	chr17	+	16342368	16343459	16342368	16343459	3	16342368,16342640,16343424,	16342374,16342728,16343459,
C17orf76-AS1	C17orf76-AS1:NR_045021:chr17:+:68:208	chr17	+	16342368	16343566	16342368	16343566	3	16342368,16342640,16343498,	16342374,16342707,16343566,
C17orf76-AS1	C17orf76-AS1:NR_027158:chr17:+:68:229	chr17	+	16342368	16343566	16342368	16343566	3	16342368,16342640,16343498,	16342374,16342728,16343566,
C17orf76-AS1	ENSG00000175061.13:ENST00000578380.2:chr17:+:136:303	chr17	+	16342505	16342999	16342505	16342999	3	16342505,16342640,16342973,	16342559,16342728,16342999,
C17orf76-AS1	C17orf76-AS1:NR_027159:chr17:+:358:495	chr17	+	16342658	16343566	16342658	16343566	2	16342658,16343498,	16342728,16343566,
C17orf76-AS1	C17orf76-AS1:NR_027161:chr17:+:450:503	chr17	+	16342863	16342917	16342863	16342917	1	16342863,	16342917,
C17orf76-AS1	C17orf76-AS1:NR_027160:chr17:+:562:618	chr17	+	16343509	16343566	16343509	16343566	1	16343509,	16343566,
C17orf76-AS1	C17orf76-AS1:NR_027158:chr17:+:226:291	chr17	+	16343562	16344742	16343562	16344742	2	16343562,16344681,	16343567,16344742,
C17orf76-AS1	C17orf76-AS1:NR_027158:chr17:+:325:537	chr17	+	16344775	16344988	16344775	16344988	1	16344775,	16344988,
C17orf76-AS1	C17orf76-AS1:NR_027158:chr17:+:619:699	chr17	+	16345069	16345150	16345069	16345150	1	16345069,	16345150,
C1RL-AS1	C1RL-AS1:NR_026947:chr12:+:322:453	chr12	+	7261416	7262664	7261416	7262664	2	7261416,7262659,	7261543,7262664,
C1RL-AS1	ENSG00000205885.3:ENST00000382215.3:chr12:+:250:546	chr12	+	7261416	7263063	7261416	7263063	2	7261416,7262893,	7261543,7263063,
C21orf119	C21orf119:NR_026845:chr21:+:90:275	chr21	+	33765531	33765717	33765531	33765717	1	33765531,	33765717,
C5orf56	C5orf56:NR_045116:chr5:+:339:692	chr5	+	131755584	131811624	131755584	131811624	3	131755584,131785341,131811358,	131755632,131785381,131811624,
C7orf13	C7orf13:NR_026865:chr7:-:33:650	chr7	-	156432697	156433315	156432697	156433315	1	156432697,	156433315,
CASC2	CASC2:NR_026939:chr10:+:220:429	chr10	+	119806551	119811682	119806551	119811682	3	119806551,119809022,119811641,	119806614,119809128,119811682,
CCDC163P	CCDC163P:NR_033297:chr1:-:585:683	chr1	-	45962258	45965078	45962258	45965078	2	45962258,45965016,	45962295,45965078,
CCDC163P	CCDC163P:NR_033296:chr1:-:470:907	chr1	-	45960730	45965281	45960730	45965281	5	45960730,45962227,45962970,45965016,45965203,	45960838,45962295,45963055,45965115,45965281,
CCDC163P	CCDC163P:NR_033298:chr1:-:470:826	chr1	-	45961190	45965281	45961190	45965281	5	45961190,45962227,45962970,45965016,45965203,	45961217,45962295,45963055,45965115,45965281,
CCDC163P	CCDC163P:NR_033297:chr1:-:470:670	chr1	-	45962271	45965281	45962271	45965281	3	45962271,45965016,45965203,	45962295,45965115,45965281,
CD27-AS1	ENSG00000215039.2:ENST00000447687.2:chr12:-:267:350	chr12	-	6557111	6557195	6557111	6557195	1	6557111,	6557195,
CD27-AS1	ENSG00000215039.2:ENST00000538616.1:chr12:-:52:423	chr12	-	6559809	6560563	6559809	6560563	2	6559809,6560528,	6560146,6560563,
CD27-AS1	ENSG00000215039.2:ENST00000536388.1:chr12:-:11:82	chr12	-	6560129	6560689	6560129	6560689	2	6560129,6560634,	6560146,6560689,
CECR7	CECR7:NR_015352:chr22:+:728:949	chr22	+	17518187	17528260	17518187	17528260	3	17518187,17525762,17528213,	17518234,17525890,17528260,
CIRBP-AS1	CIRBP-AS1:NR_027271:chr19:-:560:808	chr19	-	1268016	1268265	1268016	1268265	1	1268016,	1268265,
CIRBP-AS1	CIRBP-AS1:NR_027271:chr19:-:225:449	chr19	-	1268375	1270034	1268375	1270034	2	1268375,1269823,	1268389,1270034,
COX10-AS1	COX10-AS1:NR_049718:chr17:-:264:446	chr17	-	13937473	13937656	13937473	13937656	1	13937473,	13937656,
CRNDE	CRNDE:NR_034105:chr16:-:803:880	chr16	-	54952952	54953030	54952952	54953030	1	54952952,	54953030,
CRNDE	ENSG00000245694.4:ENST00000501177.3:chr16:-:135:389	chr16	-	54952998	54959048	54952998	54959048	4	54952998,54954209,54957496,54959012,	54953121,54954239,54957562,54959048,
CRNDE	CRNDE:NR_034105:chr16:-:497:613	chr16	-	54954307	54959048	54954307	54959048	3	54954307,54957496,54959012,	54954322,54957562,54959048,
CRNDE	ENSG00000245694.4:ENST00000558952.1:chr16:-:194:334	chr16	-	54957457	54959048	54957457	54959048	2	54957457,54959012,	54957562,54959048,
CRNDE	CRNDE:NR_034105:chr16:-:432:443	chr16	-	54959101	54959113	54959101	54959113	1	54959101,	54959113,
CROCCP2	ENSG00000215908.5:ENST00000362058.2:chr1:-:132:497	chr1	-	16958776	16969546	16958776	16969546	3	16958776,16959589,16969522,	16958866,16959841,16969546,
CROCCP2	XLOC_l2_000791:TCONS_l2_00001043:chr1:-:844:1203	chr1	-	16959647	16969604	16959647	16969604	3	16959647,16969261,16969522,	16959841,16969345,16969604,
CROCCP2	XLOC_l2_000791:TCONS_l2_00001054:chr1:-:93:317	chr1	-	16961604	16969604	16961604	16969604	3	16961604,16969261,16969522,	16961663,16969345,16969604,
CTBP1-AS1	ENSG00000196810.4:ENST00000507044.1:chr4:+:39:176	chr4	+	1243126	1243264	1243126	1243264	1	1243126,	1243264,
CTBP1-AS1	ENSG00000196810.4:ENST00000578730.1:chr4:+:26:358	chr4	+	1243264	1243597	1243264	1243597	1	1243264,	1243597,
CTBP1-AS1	ENSG00000196810.4:ENST00000507044.1:chr4:+:177:551	chr4	+	1243264	1244047	1243264	1244047	2	1243264,1243898,	1243490,1244047,
DANCR	DANCR:NR_024031:chr4:+:89:94	chr4	+	53579005	53579011	53579005	53579011	1	53579005,	53579011,
DANCR	ENSG00000226950.2:ENST00000441504.1:chr4:+:103:177	chr4	+	53579063	53579138	53579063	53579138	1	53579063,	53579138,
DANCR	DANCR:NR_024031:chr4:+:211:237	chr4	+	53579661	53579688	53579661	53579688	1	53579661,	53579688,
DANCR	DANCR:NR_024031:chr4:+:245:271	chr4	+	53579695	53579722	53579695	53579722	1	53579695,	53579722,
DANCR	ENSG00000226950.2:ENST00000444958.1:chr4:+:171:188	chr4	+	53579695	53580369	53579695	53580369	2	53579695,53580365,	53579709,53580369,
DANCR	DANCR:NR_024031:chr4:+:328:345	chr4	+	53579778	53579796	53579778	53579796	1	53579778,	53579796,
DANCR	DANCR:NR_024031:chr4:+:390:569	chr4	+	53579840	53580020	53579840	53580020	1	53579840,	53580020,
DANCR	DANCR:NR_024031:chr4:+:644:673	chr4	+	53580094	53580124	53580094	53580124	1	53580094,	53580124,
DANCR	DANCR:NR_024031:chr4:+:712:744	chr4	+	53580162	53580195	53580162	53580195	1	53580162,	53580195,
DHRS4-AS1	DHRS4-AS1:NR_023921:chr14:-:836:958	chr14	-	24410018	24410141	24410018	24410141	1	24410018,	24410141,
DHRS4-AS1	DHRS4-AS1:NR_023921:chr14:-:709:795	chr14	-	24410181	24410268	24410181	24410268	1	24410181,	24410268,
DHRS4-AS1	ENSG00000215256.3:ENST00000554036.1:chr14:-:2:193	chr14	-	24422513	24423059	24422513	24423059	2	24422513,24422982,	24422628,24423059,
DHRS4-AS1	DHRS4-AS1:NR_023923:chr14:-:113:334	chr14	-	24410351	24423188	24410351	24423188	2	24410351,24422982,	24410367,24423188,
DHRS4-AS1	DHRS4-AS1:NR_023921:chr14:-:204:440	chr14	-	24422951	24423188	24422951	24423188	1	24422951,	24423188,
DLEU2	DLEU2:NR_002612:chr13:-:454:582	chr13	-	50618802	50623746	50618802	50623746	2	50618802,50623719,	50618904,50623746,
DLEU2	ENSG00000231607.4:ENST00000443587.1:chr13:-:258:353	chr13	-	50642250	50644764	50642250	50644764	2	50642250,50644717,	50642299,50644764,
DLEU2	DLEU2:NR_002612:chr13:-:324:383	chr13	-	50642250	50649705	50642250	50649705	2	50642250,50649694,	50642299,50649705,
DLEU2	DLEU2:NR_002612:chr13:-:307:327	chr13	-	50649701	50649722	50649701	50649722	1	50649701,	50649722,
DLEU2	ENSG00000231607.4:ENST00000235290.3:chr13:-:14:52	chr13	-	50656074	50656113	50656074	50656113	1	50656074,	50656113,
DLGAP1-AS1	ENSG00000177337.3:ENST00000574411.1:chr18:+:4:222	chr18	+	3594128	3597185	3594128	3597185	3	3594128,3596576,3597173,	3594238,3596673,3597185,
DLGAP1-AS1	ENSG00000177337.3:ENST00000576606.1:chr18:+:19:246	chr18	+	3594128	3597226	3594128	3597226	3	3594128,3594417,3597173,	3594238,3594482,3597226,
DLGAP1-AS1	DLGAP1-AS1:NR_024101:chr18:+:45:209	chr18	+	3594156	3596594	3594156	3596594	3	3594156,3594417,3596576,	3594238,3594482,3596594,
DLGAP1-AS1	ENSG00000177337.3:ENST00000576606.1:chr18:+:47:205	chr18	+	3594156	3597185	3594156	3597185	3	3594156,3594417,3597173,	3594238,3594482,3597185,
DLGAP1-AS1	DLGAP1-AS1:NR_024101:chr18:+:214:300	chr18	+	3596598	3596685	3596598	3596685	1	3596598,	3596685,
DLGAP1-AS1	DLGAP1-AS1:NR_024101:chr18:+:455:841	chr18	+	3596839	3597226	3596839	3597226	1	3596839,	3597226,
DNAJC9-AS1	ENSG00000227540.1:ENST00000394864.2:chr10:+:231:404	chr10	+	75013703	75013877	75013703	75013877	1	75013703,	75013877,
ENSG00000100181.17	ENSG00000100181.17:ENST00000591299.1:chr22:+:15:467	chr22	+	17082954	17094940	17082954	17094940	3	17082954,17092547,17094874,	17083105,17092783,17094940,
ENSG00000100181.17	ENSG00000100181.17:ENST00000400593.2:chr22:+:154:555	chr22	+	17082954	17094981	17082954	17094981	3	17082954,17092547,17094966,	17083105,17092783,17094981,
ENSG00000100181.17	ENSG00000100181.17:ENST00000426585.1:chr22:+:21:335	chr22	+	17082954	17119524	17082954	17119524	4	17082954,17103730,17117929,17119468,	17083105,17103787,17117980,17119524,
ENSG00000100181.17	ENSG00000100181.17:ENST00000588548.1:chr22:+:1764:1964	chr22	+	17095235	17095436	17095235	17095436	1	17095235,	17095436,
ENSG00000130600.11	ENSG00000130600.11:ENST00000412788.1:chr11:-:1576:1671	chr11	-	2017014	2017197	2017014	2017197	2	2017014,2017105,	2017018,2017197,
ENSG00000130600.11	ENSG00000130600.11:ENST00000411861.1:chr11:-:979:1074	chr11	-	2017101	2017197	2017101	2017197	1	2017101,	2017197,
ENSG00000130600.11	ENSG00000130600.11:ENST00000428066.1:chr11:-:232:627	chr11	-	2017020	2022468	2017020	2022468	5	2017020,2017105,2017308,2017516,2022447,	2017024,2017228,2017421,2017651,2022468,
ENSG00000142396.6	ENSG00000142396.6:ENST00000413518.1:chr19:+:94:108	chr19	+	58816808	58817465	58816808	58817465	2	58816808,58817453,	58816811,58817465,
ENSG00000142396.6	ENSG00000142396.6:ENST00000608070.1:chr19:+:84:383	chr19	+	58817468	58823572	58817468	58823572	2	58817468,58823386,	58817582,58823572,
ENSG00000142396.6	ENSG00000142396.6:ENST00000413518.1:chr19:+:192:224	chr19	+	58817548	58817581	58817548	58817581	1	58817548,	58817581,
ENSG00000142396.6	ENSG00000142396.6:ENST00000590505.1:chr19:+:3118:3468	chr19	+	58823513	58826149	58823513	58826149	2	58823513,58826113,	58823828,58826149,
ENSG00000163364.5	ENSG00000163364.5:ENST00000295549.4:chr2:-:560:823	chr2	-	177494899	177497763	177494899	177497763	2	177494899,177497760,	177495160,177497763,
ENSG00000163364.5	ENSG00000163364.5:ENST00000295549.4:chr2:-:520:546	chr2	-	177497776	177497803	177497776	177497803	1	177497776,	177497803,
ENSG00000163364.5	ENSG00000163364.5:ENST00000295549.4:chr2:-:162:413	chr2	-	177502245	177502497	177502245	177502497	1	177502245,	177502497,
ENSG00000163597.10	ENSG00000163597.10:ENST00000586846.1:chr17:+:33:143	chr17	+	74553881	74554104	74553881	74554104	2	74553881,74554051,	74553939,74554104,
ENSG00000163597.10	ENSG00000163597.10:ENST00000586942.1:chr17:+:31:144	chr17	+	74553881	74554511	74553881	74554511	2	74553881,74554455,	74553939,74554511,
ENSG00000163597.10	ENSG00000163597.10:ENST00000590435.1:chr17:+:8:70	chr17	+	74553881	74555031	74553881	74555031	2	74553881,74555026,	74553939,74555031,
ENSG00000163597.10	ENSG00000163597.10:ENST00000493536.1:chr17:+:30:131	chr17	+	74553881	74557413	74553881	74557413	2	74553881,74557369,	74553939,74557413,
ENSG00000163597.10	ENSG00000163597.10:ENST00000590435.1:chr17:+:60:161	chr17	+	74553933	74555122	74553933	74555122	2	74553933,74555026,	74553939,74555122,
ENSG00000163597.10	ENSG00000163597.10:ENST00000591956.1:chr17:+:86:214	chr17	+	74553933	74557492	74553933	74557492	2	74553933,74557369,	74553939,74557492,
ENSG00000163597.10	SNHG16:NR_038110:chr17:+:88:213	chr17	+	74553933	74559205	74553933	74559205	3	74553933,74557369,74559200,	74553939,74557484,74559205,
ENSG00000163597.10	ENSG00000163597.10:ENST00000493536.1:chr17:+:82:252	chr17	+	74553933	74559254	74553933	74559254	3	74553933,74557369,74559200,	74553939,74557480,74559254,
ENSG00000163597.10	ENSG00000163597.10:ENST00000586942.1:chr17:+:86:124	chr17	+	74553936	74554491	74553936	74554491	2	74553936,74554455,	74553939,74554491,
ENSG00000163597.10	ENSG00000163597.10:ENST00000587838.1:chr17:+:104:181	chr17	+	74554648	74557413	74554648	74557413	2	74554648,74557369,	74554682,74557413,
ENSG00000163597.10	ENSG00000163597.10:ENST00000586942.1:chr17:+:313:411	chr17	+	74554679	74555122	74554679	74555122	2	74554679,74555026,	74554682,74555122,
ENSG00000163597.10	ENSG00000163597.10:ENST00000587838.1:chr17:+:135:302	chr17	+	74554679	74559254	74554679	74559254	3	74554679,74557369,74559200,	74554682,74557480,74559254,
ENSG00000163597.10	ENSG00000163597.10:ENST00000448136.1:chr17:+:1201:1206	chr17	+	74555060	74555066	74555060	74555066	1	74555060,	74555066,
ENSG00000163597.10	ENSG00000163597.10:ENST00000448136.1:chr17:+:1366:1545	chr17	+	74557469	74559369	74557469	74559369	2	74557469,74559200,	74557480,74559369,
ENSG00000163597.10	ENSG00000163597.10:ENST00000448136.1:chr17:+:1625:1669	chr17	+	74559448	74559493	74559448	74559493	1	74559448,	74559493,
ENSG00000163597.10	ENSG00000163597.10:ENST00000448136.1:chr17:+:1674:1691	chr17	+	74559497	74559515	74559497	74559515	1	74559497,	74559515,
ENSG00000163597.10	ENSG00000163597.10:ENST00000448136.1:chr17:+:1714:1773	chr17	+	74559537	74559597	74559537	74559597	1	74559537,	74559597,
ENSG00000163597.10	ENSG00000163597.10:ENST00000448136.1:chr17:+:2289:2330	chr17	+	74560112	74560154	74560112	74560154	1	74560112,	74560154,
ENSG00000163597.10	ENSG00000163597.10:ENST00000448136.1:chr17:+:2490:2612	chr17	+	74560313	74560436	74560313	74560436	1	74560313,	74560436,
ENSG00000163597.10	ENSG00000163597.10:ENST00000448136.1:chr17:+:2849:2854	chr17	+	74560672	74560678	74560672	74560678	1	74560672,	74560678,
ENSG00000167912.5	ENSG00000167912.5:ENST00000517898.1:chr8:+:222:329	chr8	+	60032990	60033098	60032990	60033098	1	60032990,	60033098,
ENSG00000170846.11	ENSG00000170846.11:ENST00000307533.6:chr4:+:59:259	chr4	+	6675236	6675437	6675236	6675437	1	6675236,	6675437,
ENSG00000170846.11	ENSG00000170846.11:ENST00000307533.6:chr4:+:387:563	chr4	+	6675564	6675741	6675564	6675741	1	6675564,	6675741,
ENSG00000170846.11	ENSG00000170846.11:ENST00000307533.6:chr4:+:628:762	chr4	+	6675805	6675940	6675805	6675940	1	6675805,	6675940,
ENSG00000170846.11	ENSG00000170846.11:ENST00000307533.6:chr4:+:762:1121	chr4	+	6675939	6676299	6675939	6676299	1	6675939,	6676299,
ENSG00000170919.11	ENSG00000170919.11:ENST00000412946.2:chr13:+:42:317	chr13	+	45915595	45918545	45915595	45918545	2	45915595,45918439,	45915765,45918545,
ENSG00000174365.15	ENSG00000174365.15:ENST00000400436.2:chr20:+:139:390	chr20	+	37075435	37075687	37075435	37075687	1	37075435,	37075687,
ENSG00000174365.15	ENSG00000174365.15:ENST00000359074.4:chr20:+:83:409	chr20	+	37075435	37076215	37075435	37076215	2	37075435,37076108,	37075655,37076215,
ENSG00000174365.15	ENSG00000174365.15:ENST00000449351.1:chr20:+:92:313	chr20	+	37075435	37077308	37075435	37077308	3	37075435,37076108,37077304,	37075495,37076266,37077308,
ENSG00000174365.15	ENSG00000174365.15:ENST00000421599.1:chr20:+:355:543	chr20	+	37076141	37077372	37076141	37077372	2	37076141,37077308,	37076266,37077372,
ENSG00000175611.7	ENSG00000175611.7:ENST00000321517.3:chr9:-:1164:1232	chr9	-	98632601	98632670	98632601	98632670	1	98632601,	98632670,
ENSG00000175611.7	ENSG00000175611.7:ENST00000321517.3:chr9:-:531:563	chr9	-	98637694	98637727	98637694	98637727	1	98637694,	98637727,
ENSG00000175701.6	ENSG00000175701.6:ENST00000414416.2:chr2:-:1967:2014	chr2	-	110969141	110969189	110969141	110969189	1	110969141,	110969189,
ENSG00000175701.6	ENSG00000175701.6:ENST00000414416.2:chr2:-:1851:1964	chr2	-	110969191	110969897	110969191	110969897	2	110969191,110969791,	110969199,110969897,
ENSG00000175701.6	ENSG00000175701.6:ENST00000414416.2:chr2:-:1433:1816	chr2	-	110969931	110970315	110969931	110970315	1	110969931,	110970315,
ENSG00000177410.8	ENSG00000177410.8:ENST00000458653.1:chr20:+:58:228	chr20	+	47894865	47895742	47894865	47895742	2	47894865,47895640,	47894934,47895742,
ENSG00000177410.8	ENSG00000177410.8:ENST00000326677.5:chr20:+:241:282	chr20	+	47897060	47897102	47897060	47897102	1	47897060,	47897102,
ENSG00000177410.8	ENSG00000177410.8:ENST00000326677.5:chr20:+:297:452	chr20	+	47905590	47905746	47905590	47905746	1	47905590,	47905746,
ENSG00000179523.4	ENSG00000179523.4:ENST00000313807.4:chr15:-:590:646	chr15	-	44828474	44828531	44828474	44828531	1	44828474,	44828531,
ENSG00000179523.4	ENSG00000179523.4:ENST00000313807.4:chr15:-:262:522	chr15	-	44828598	44828859	44828598	44828859	1	44828598,	44828859,
ENSG00000179859.7	ENSG00000179859.7:ENST00000324348.7:chr17:-:390:503	chr17	-	7818666	7818780	7818666	7818780	1	7818666,	7818780,
ENSG00000179859.7	ENSG00000179859.7:ENST00000324348.7:chr17:-:37:330	chr17	-	7818839	7819234	7818839	7819234	2	7818839,7818996,	7818895,7819234,
ENSG00000181798.2	ENSG00000181798.2:ENST00000313064.2:chr2:-:15:206	chr2	-	232378843	232379035	232378843	232379035	1	232378843,	232379035,
ENSG00000182165.13	ENSG00000182165.13:ENST00000359941.5:chr7:-:562:690	chr7	-	86954704	86970911	86954704	86970911	2	86954704,86970838,	86954760,86970911,
ENSG00000182165.13	ENSG00000182165.13:ENST00000359941.5:chr7:-:498:551	chr7	-	86970921	86970975	86970921	86970975	1	86970921,	86970975,
ENSG00000182165.13	ENSG00000182165.13:ENST00000359941.5:chr7:-:355:510	chr7	-	86970962	86974476	86970962	86974476	2	86970962,86974358,	86971000,86974476,
ENSG00000182165.13	ENSG00000182165.13:ENST00000432193.1:chr7:-:203:274	chr7	-	86970978	86974599	86970978	86974599	2	86970978,86974549,	86971000,86974599,
ENSG00000182165.13	ENSG00000182165.13:ENST00000421293.1:chr7:-:111:203	chr7	-	86970978	86974691	86970978	86974691	2	86970978,86974620,	86971000,86974691,
ENSG00000182165.13	ENSG00000182165.13:ENST00000359941.5:chr7:-:140:409	chr7	-	86974421	86974691	86974421	86974691	1	86974421,	86974691,
ENSG00000182165.13	ENSG00000182165.13:ENST00000359941.5:chr7:-:99:140	chr7	-	86974690	86974732	86974690	86974732	1	86974690,	86974732,
ENSG00000185186.4	ENSG00000185186.4:ENST00000441283.1:chr21:-:148:330	chr21	-	44896421	44896604	44896421	44896604	1	44896421,	44896604,
ENSG00000185186.4	ENSG00000185186.4:ENST00000441283.1:chr21:-:99:242	chr21	-	44896509	44897965	44896509	44897965	2	44896509,44897943,	44896631,44897965,
ENSG00000185904.7	ENSG00000185904.7:ENST00000429940.2:chr10:+:30:596	chr10	+	42971020	42982503	42971020	42982503	3	42971020,42972708,42982426,	42971328,42972890,42982503,
ENSG00000185904.7	ENSG00000185904.7:ENST00000424751.2:chr10:+:11:256	chr10	+	42971086	42971332	42971086	42971332	1	42971086,	42971332,
ENSG00000185904.7	ENSG00000185904.7:ENST00000424751.2:chr10:+:151:225	chr10	+	42971226	42971301	42971226	42971301	1	42971226,	42971301,
ENSG00000185904.7	ENSG00000185904.7:ENST00000424751.2:chr10:+:529:684	chr10	+	42982436	42987545	42982436	42987545	2	42982436,42987527,	42982574,42987545,
ENSG00000186594.8	ENSG00000186594.8:ENST00000571595.1:chr17:-:392:523	chr17	-	1615787	1615919	1615787	1615919	1	1615787,	1615919,
ENSG00000186594.8	ENSG00000186594.8:ENST00000573127.1:chr17:-:415:492	chr17	-	1616060	1616138	1616060	1616138	1	1616060,	1616138,
ENSG00000186594.8	ENSG00000186594.8:ENST00000334146.3:chr17:-:332:505	chr17	-	1615663	1617140	1615663	1617140	2	1615663,1616996,	1615693,1617140,
ENSG00000186594.8	ENSG00000186594.8:ENST00000575626.1:chr17:-:247:519	chr17	-	1616060	1617140	1616060	1617140	2	1616060,1616996,	1616189,1617140,
ENSG00000186594.8	ENSG00000186594.8:ENST00000573075.1:chr17:-:369:518	chr17	-	1616213	1617140	1616213	1617140	2	1616213,1616996,	1616219,1617140,
ENSG00000186594.8	ENSG00000186594.8:ENST00000608913.1:chr17:-:249:476	chr17	-	1616265	1617140	1616265	1617140	2	1616265,1616996,	1616349,1617140,
ENSG00000186594.8	ENSG00000186594.8:ENST00000574306.1:chr17:-:290:550	chr17	-	1616879	1617140	1616879	1617140	1	1616879,	1617140,
ENSG00000186594.8	ENSG00000186594.8:ENST00000570416.1:chr17:-:157:393	chr17	-	1615526	1617219	1615526	1617219	2	1615526,1617149,	1615693,1617219,
ENSG00000186594.8	ENSG00000186594.8:ENST00000571595.1:chr17:-:301:432	chr17	-	1615878	1617219	1615878	1617219	2	1615878,1617149,	1615940,1617219,
ENSG00000186594.8	ENSG00000186594.8:ENST00000334146.3:chr17:-:253:366	chr17	-	1617105	1617219	1617105	1617219	1	1617105,	1617219,
ENSG00000186594.8	ENSG00000186594.8:ENST00000571595.1:chr17:-:279:647	chr17	-	1615663	1617241	1615663	1617241	2	1615663,1617149,	1615940,1617241,
ENSG00000186594.8	ENSG00000186594.8:ENST00000573127.1:chr17:-:263:544	chr17	-	1616008	1617241	1616008	1617241	2	1616008,1617149,	1616198,1617241,
ENSG00000186594.8	ENSG00000186594.8:ENST00000573075.1:chr17:-:25:243	chr17	-	1617265	1619516	1617265	1619516	3	1617265,1617664,1619423,	1617308,1617747,1619516,
ENSG00000186594.8	ENSG00000186594.8:ENST00000571595.1:chr17:-:119:244	chr17	-	1617275	1619516	1617275	1619516	2	1617275,1619423,	1617308,1619516,
ENSG00000186615.6	ENSG00000186615.6:ENST00000412224.2:chr14:-:321:566	chr14	-	56026307	56027867	56026307	56027867	2	56026307,56027806,	56026492,56027867,
ENSG00000186615.6	ENSG00000186615.6:ENST00000335142.5:chr14:-:298:459	chr14	-	56043908	56044070	56043908	56044070	1	56043908,	56044070,
ENSG00000186615.6	ENSG00000186615.6:ENST00000412224.2:chr14:-:33:245	chr14	-	56045384	56046795	56045384	56046795	2	56045384,56046653,	56045455,56046795,
ENSG00000188185.7	ENSG00000188185.7:ENST00000340510.4:chr7:+:126:254	chr7	+	39773356	39773485	39773356	39773485	1	39773356,	39773485,
ENSG00000188825.9	ENSG00000188825.9:ENST00000586231.1:chr17:-:1451:1459	chr17	-	41464660	41464669	41464660	41464669	1	41464660,	41464669,
ENSG00000188825.9	ENSG00000188825.9:ENST00000586231.1:chr17:-:1374:1391	chr17	-	41464728	41464746	41464728	41464746	1	41464728,	41464746,
ENSG00000188825.9	ENSG00000188825.9:ENST00000586231.1:chr17:-:1365:1370	chr17	-	41464749	41464755	41464749	41464755	1	41464749,	41464755,
ENSG00000189223.9	ENSG00000189223.9:ENST00000333145.5:chr2:+:14:451	chr2	+	113993130	114017000	113993130	114017000	4	113993130,113994089,114012966,114016840,	113993147,113994190,114013126,114017000,
ENSG00000189223.9	ENSG00000189223.9:ENST00000437551.1:chr2:+:34:276	chr2	+	113993137	113996775	113993137	113996775	3	113993137,113995666,113996665,	113993147,113995789,113996775,
ENSG00000189223.9	ENSG00000189223.9:ENST00000553869.2:chr2:+:21:176	chr2	+	113993137	114016863	113993137	114016863	3	113993137,113995666,114016840,	113993147,113995789,114016863,
ENSG00000189223.9	ENSG00000189223.9:ENST00000451179.1:chr2:+:31:429	chr2	+	113993137	114020960	113993137	114020960	4	113993137,113995666,114012966,114020854,	113993147,113995789,114013126,114020960,
ENSG00000196756.7	ENSG00000196756.7:ENST00000414142.1:chr20:-:1941:2018	chr20	-	37049322	37049400	37049322	37049400	1	37049322,	37049400,
ENSG00000196756.7	LOC388796:NR_027241:chr20:-:730:927	chr20	-	37049496	37050787	37049496	37050787	3	37049496,37049652,37050733,	37049547,37049745,37050787,
ENSG00000196756.7	ENSG00000196756.7:ENST00000414142.1:chr20:-:223:426	chr20	-	37055078	37059732	37055078	37059732	3	37055078,37056322,37059683,	37055146,37056409,37059732,
ENSG00000196756.7	ENSG00000196756.7:ENST00000414142.1:chr20:-:190:207	chr20	-	37059747	37063156	37059747	37063156	2	37059747,37063146,	37059755,37063156,
ENSG00000196756.7	ENSG00000196756.7:ENST00000413755.1:chr20:-:320:334	chr20	-	37059747	37063676	37059747	37063676	2	37059747,37063669,	37059755,37063676,
ENSG00000196756.7	ENSG00000196756.7:ENST00000413755.1:chr20:-:177:212	chr20	-	37063783	37063819	37063783	37063819	1	37063783,	37063819,
ENSG00000196756.7	ENSG00000196756.7:ENST00000414142.1:chr20:-:19:162	chr20	-	37063183	37063897	37063183	37063897	2	37063183,37063839,	37063269,37063897,
ENSG00000197989.9	ENSG00000197989.9:ENST00000461448.1:chr1:-:100:249	chr1	-	28908104	28908254	28908104	28908254	1	28908104,	28908254,
ENSG00000203288.3	ENSG00000203288.3:ENST00000389897.3:chr1:+:32:208	chr1	+	151763349	151763526	151763349	151763526	1	151763349,	151763526,
ENSG00000203499.6	ENSG00000203499.6:ENST00000533004.1:chr8:+:84:359	chr8	+	144818023	144826130	144818023	144826130	3	144818023,144822028,144826029,	144818108,144822118,144826130,
ENSG00000203499.6	ENSG00000203499.6:ENST00000533004.1:chr8:+:125:238	chr8	+	144818064	144822098	144818064	144822098	2	144818064,144822028,	144818108,144822098,
ENSG00000203499.6	ENSG00000203499.6:ENST00000534398.1:chr8:+:40:177	chr8	+	144821605	144822098	144821605	144822098	2	144821605,144822028,	144821673,144822098,
ENSG00000203499.6	ENSG00000203499.6:ENST00000435097.2:chr8:+:674:787	chr8	+	144823941	144824055	144823941	144824055	1	144823941,	144824055,
ENSG00000203499.6	ENSG00000203499.6:ENST00000435097.2:chr8:+:845:1015	chr8	+	144824112	144824283	144824112	144824283	1	144824112,	144824283,
ENSG00000203499.6	ENSG00000203499.6:ENST00000435097.2:chr8:+:1193:2005	chr8	+	144824460	144825273	144824460	144825273	1	144824460,	144825273,
ENSG00000203706.4	ENSG00000203706.4:ENST00000437764.1:chr1:-:513:548	chr1	-	210404977	210405013	210404977	210405013	1	210404977,	210405013,
ENSG00000203706.4	ENSG00000203706.4:ENST00000437764.1:chr1:-:479:523	chr1	-	210405002	210405047	210405002	210405047	1	210405002,	210405047,
ENSG00000203706.4	ENSG00000203706.4:ENST00000437764.1:chr1:-:372:458	chr1	-	210405067	210407017	210405067	210407017	2	210405067,210406979,	210405116,210407017,
ENSG00000204054.7	ENSG00000204054.7:ENST00000444184.1:chr9:+:87:545	chr9	+	132250910	132251369	132250910	132251369	1	132250910,	132251369,
ENSG00000204054.7	ENSG00000204054.7:ENST00000608369.1:chr9:+:321:548	chr9	+	132251511	132253283	132251511	132253283	2	132251511,132253122,	132251578,132253283,
ENSG00000204054.7	ENSG00000204054.7:ENST00000454968.1:chr9:+:207:290	chr9	+	132251511	132255714	132251511	132255714	2	132251511,132255697,	132251578,132255714,
ENSG00000204054.7	ENSG00000204054.7:ENST00000423918.1:chr9:+:126:212	chr9	+	132251511	132255776	132251511	132255776	2	132251511,132255756,	132251578,132255776,
ENSG00000204054.7	ENSG00000204054.7:ENST00000419300.3:chr9:+:133:291	chr9	+	132251511	132265693	132251511	132265693	2	132251511,132265601,	132251578,132265693,
ENSG00000204054.7	ENSG00000204054.7:ENST00000454968.1:chr9:+:265:408	chr9	+	132251569	132255832	132251569	132255832	2	132251569,132255697,	132251578,132255832,
ENSG00000204054.7	ENSG00000204054.7:ENST00000419300.3:chr9:+:191:256	chr9	+	132251569	132265658	132251569	132265658	2	132251569,132265601,	132251578,132265658,
ENSG00000204054.7	ENSG00000204054.7:ENST00000423918.1:chr9:+:203:268	chr9	+	132255766	132255832	132255766	132255832	1	132255766,	132255832,
ENSG00000204054.7	ENSG00000204054.7:ENST00000454635.2:chr9:+:451:666	chr9	+	132255838	132265658	132255838	132265658	3	132255838,132264675,132265601,	132255874,132264798,132265658,
ENSG00000204054.7	ENSG00000204054.7:ENST00000412141.1:chr9:+:90:194	chr9	+	132265370	132265658	132265370	132265658	2	132265370,132265601,	132265418,132265658,
ENSG00000204054.7	ENSG00000204054.7:ENST00000412141.1:chr9:+:365:442	chr9	+	132265828	132265906	132265828	132265906	1	132265828,	132265906,
ENSG00000204272.6	ENSG00000204272.6:ENST00000374922.4:chrX:+:95:301	chrX	+	56755786	56755993	56755786	56755993	1	56755786,	56755993,
ENSG00000204272.6	ENSG00000204272.6:ENST00000374922.4:chrX:+:349:444	chrX	+	56758513	56758609	56758513	56758609	1	56758513,	56758609,
ENSG00000204272.6	XLOC_l2_015536:TCONS_l2_00030698:chrX:+:364:441	chrX	+	56758513	56843765	56758513	56843765	3	56758513,56758612,56843752,	56758558,56758632,56843765,
ENSG00000204792.2	ENSG00000204792.2:ENST00000435984.1:chr2:+:72:266	chr2	+	75145346	75145541	75145346	75145541	1	75145346,	75145541,
ENSG00000204860.4	ENSG00000204860.4:ENST00000484285.2:chr9:+:139:390	chr9	+	38620869	38621930	38620869	38621930	2	38620869,38621828,	38621019,38621930,
ENSG00000205559.3	ENSG00000205559.3:ENST00000380711.3:chr22:+:422:571	chr22	+	51022150	51022300	51022150	51022300	1	51022150,	51022300,
ENSG00000206573.4	ENSG00000206573.4:ENST00000467069.2:chr3:-:278:301	chr3	-	9432033	9432057	9432033	9432057	1	9432033,	9432057,
ENSG00000206573.4	ENSG00000206573.4:ENST00000467069.2:chr3:-:182:202	chr3	-	9432132	9432153	9432132	9432153	1	9432132,	9432153,
ENSG00000206573.4	ENSG00000206573.4:ENST00000467069.2:chr3:-:90:341	chr3	-	9431993	9433426	9431993	9433426	2	9431993,9433362,	9432181,9433426,
ENSG00000206573.4	ENSG00000206573.4:ENST00000469846.2:chr3:-:239:415	chr3	-	9433249	9433426	9433249	9433426	1	9433249,	9433426,
ENSG00000206573.4	ENSG00000206573.4:ENST00000520447.1:chr3:-:142:381	chr3	-	9431993	9433440	9431993	9433440	2	9431993,9433388,	9432181,9433440,
ENSG00000206573.4	ENSG00000206573.4:ENST00000467069.2:chr3:-:76:165	chr3	-	9432169	9433440	9432169	9433440	2	9432169,9433362,	9432181,9433440,
ENSG00000206573.4	ENSG00000206573.4:ENST00000469846.2:chr3:-:225:317	chr3	-	9433347	9433440	9433347	9433440	1	9433347,	9433440,
ENSG00000206573.4	ENSG00000206573.4:ENST00000467069.2:chr3:-:52:57	chr3	-	9433458	9433464	9433458	9433464	1	9433458,	9433464,
ENSG00000206573.4	ENSG00000206573.4:ENST00000520396.1:chr3:-:37:57	chr3	-	9432169	9438252	9432169	9438252	2	9432169,9438243,	9432181,9438252,
ENSG00000206573.4	ENSG00000206573.4:ENST00000519043.1:chr3:-:9:101	chr3	-	9433466	9440254	9433466	9440254	2	9433466,9440205,	9433510,9440254,
ENSG00000212978.5	ENSG00000212978.5:ENST00000420918.2:chr2:-:72:275	chr2	-	61370982	61372013	61370982	61372013	2	61370982,61371907,	61371080,61372013,
ENSG00000212978.5	ENSG00000212978.5:ENST00000443946.1:chr2:-:91:303	chr2	-	61371670	61372013	61371670	61372013	2	61371670,61371907,	61371777,61372013,
ENSG00000213742.2	ENSG00000213742.2:ENST00000414393.1:chr20:+:222:305	chr20	+	25614684	25614768	25614684	25614768	1	25614684,	25614768,
ENSG00000213793.3	XLOC_l2_007111:TCONS_l2_00013205:chr19:-:147:2141	chr19	-	53409417	53411412	53409417	53411412	1	53409417,	53411412,
ENSG00000213904.4	ENSG00000213904.4:ENST00000593491.2:chr19:+:121:264	chr19	+	42912433	42912577	42912433	42912577	1	42912433,	42912577,
ENSG00000213963.2	ENSG00000213963.2:ENST00000397057.2:chr2:-:26:151	chr2	-	178203390	178257389	178203390	178257389	2	178203390,178257300,	178203427,178257389,
ENSG00000214145.2	ENSG00000214145.2:ENST00000397644.2:chr3:-:37:273	chr3	-	194023546	194023783	194023546	194023783	1	194023546,	194023783,
ENSG00000214145.2	ENSG00000214145.2:ENST00000456816.1:chr3:-:117:512	chr3	-	194014536	194023803	194014536	194023803	3	194014536,194019342,194023545,	194014636,194019380,194023803,
ENSG00000214145.2	ENSG00000214145.2:ENST00000414120.1:chr3:-:183:488	chr3	-	194021508	194030406	194021508	194030406	3	194021508,194023545,194030389,	194021526,194023816,194030406,
ENSG00000214184.3	ENSG00000214184.3:ENST00000322353.3:chr2:-:99:251	chr2	-	109150400	109150553	109150400	109150553	1	109150400,	109150553,
ENSG00000214293.4	ENSG00000214293.4:ENST00000398043.2:chr7:-:139:318	chr7	-	77325263	77325443	77325263	77325443	1	77325263,	77325443,
ENSG00000214548.10	ENSG00000214548.10:ENST00000398518.2:chr14:+:106:258	chr14	+	101295059	101295429	101295059	101295429	2	101295059,101295370,	101295153,101295429,
ENSG00000215424.5	ENSG00000215424.5:ENST00000414659.1:chr21:+:69:440	chr21	+	47650273	47669517	47650273	47669517	3	47650273,47660747,47669499,	47650441,47660933,47669517,
ENSG00000215424.5	ENSG00000215424.5:ENST00000432735.1:chr21:+:133:333	chr21	+	47656237	47660945	47656237	47660945	2	47656237,47660747,	47656240,47660945,
ENSG00000215424.5	ENSG00000215424.5:ENST00000591223.1:chr21:+:63:260	chr21	+	47660768	47663353	47660768	47663353	2	47660768,47663320,	47660933,47663353,
ENSG00000215447.3	ENSG00000215447.3:ENST00000400362.2:chr21:+:213:335	chr21	+	46710406	46710529	46710406	46710529	1	46710406,	46710529,
ENSG00000218510.3	ENSG00000218510.3:ENST00000404210.2:chr1:+:95:109	chr1	+	22352121	22352136	22352121	22352136	1	22352121,	22352136,
ENSG00000218510.3	XLOC_l2_000101:TCONS_l2_00000155:chr1:+:123:170	chr1	+	22352121	22356809	22352121	22356809	2	22352121,22356772,	22352132,22356809,
ENSG00000218510.3	ENSG00000218510.3:ENST00000404210.2:chr1:+:191:202	chr1	+	22356853	22356865	22356853	22356865	1	22356853,	22356865,
ENSG00000218510.3	ENSG00000218510.3:ENST00000404210.2:chr1:+:199:315	chr1	+	22356861	22356978	22356861	22356978	1	22356861,	22356978,
ENSG00000218510.3	ENSG00000218510.3:ENST00000404210.2:chr1:+:382:450	chr1	+	22357044	22357113	22357044	22357113	1	22357044,	22357113,
ENSG00000219665.4	ENSG00000219665.4:ENST00000406892.2:chr19:+:204:254	chr19	+	12098635	12112636	12098635	12112636	2	12098635,12112588,	12098638,12112636,
ENSG00000221817.5	ENSG00000221817.5:ENST00000422977.1:chr10:+:301:384	chr10	+	75255907	75255991	75255907	75255991	1	75255907,	75255991,
ENSG00000222041.6	ENSG00000222041.6:ENST00000331944.6:chr2:+:89:217	chr2	+	87755036	87820726	87755036	87820726	2	87755036,87820725,	87755164,87820726,
ENSG00000222041.6	ENSG00000222041.6:ENST00000409054.1:chr2:+:150:278	chr2	+	87755036	87882777	87755036	87882777	2	87755036,87882776,	87755164,87882777,
ENSG00000222041.6	ENSG00000222041.6:ENST00000414584.1:chr2:+:263:475	chr2	+	87779745	87820741	87779745	87820741	2	87779745,87820725,	87779942,87820741,
ENSG00000222041.6	ENSG00000222041.6:ENST00000331944.6:chr2:+:265:423	chr2	+	87820773	87820932	87820773	87820932	1	87820773,	87820932,
ENSG00000223478.1	ENSG00000223478.1:ENST00000443631.1:chr9:+:74:79	chr9	+	131486797	131486803	131486797	131486803	1	131486797,	131486803,
ENSG00000223478.1	ENSG00000223478.1:ENST00000443631.1:chr9:+:192:353	chr9	+	131495121	131495283	131495121	131495283	1	131495121,	131495283,
ENSG00000223482.3	ENSG00000223482.3:ENST00000446751.1:chr10:-:1193:1303	chr10	-	89004978	89005089	89004978	89005089	1	89004978,	89005089,
ENSG00000223482.3	ENSG00000223482.3:ENST00000446751.1:chr10:-:1044:1133	chr10	-	89005148	89005238	89005148	89005238	1	89005148,	89005238,
ENSG00000223482.3	ENSG00000223482.3:ENST00000446751.1:chr10:-:860:937	chr10	-	89005344	89005422	89005344	89005422	1	89005344,	89005422,
ENSG00000223482.3	ENSG00000223482.3:ENST00000446751.1:chr10:-:819:824	chr10	-	89005457	89005463	89005457	89005463	1	89005457,	89005463,
ENSG00000223482.3	ENSG00000223482.3:ENST00000446751.1:chr10:-:739:774	chr10	-	89005507	89005543	89005507	89005543	1	89005507,	89005543,
ENSG00000223482.3	ENSG00000223482.3:ENST00000433530.1:chr10:-:176:205	chr10	-	89005883	89005913	89005883	89005913	1	89005883,	89005913,
ENSG00000223482.3	ENSG00000223482.3:ENST00000446751.1:chr10:-:588:680	chr10	-	89005601	89005953	89005601	89005953	2	89005601,89005871,	89005612,89005953,
ENSG00000223482.3	ENSG00000223482.3:ENST00000447424.1:chr10:-:219:491	chr10	-	88998502	89067730	88998502	89067730	4	88998502,89005871,89048198,89067713,	88998606,89005969,89048252,89067730,
ENSG00000223482.3	ENSG00000223482.3:ENST00000413961.1:chr10:-:18:128	chr10	-	89096606	89102069	89096606	89102069	2	89096606,89101998,	89096646,89102069,
ENSG00000223485.1	ENSG00000223485.1:ENST00000439703.1:chr6:-:102:218	chr6	-	169562800	169562917	169562800	169562917	1	169562800,	169562917,
ENSG00000223485.1	ENSG00000223485.1:ENST00000439703.1:chr6:-:9:83	chr6	-	169562935	169563010	169562935	169563010	1	169562935,	169563010,
ENSG00000223485.1	XLOC_005935:TCONS_00012830:chr6:-:42:296	chr6	-	169562792	169563047	169562792	169563047	1	169562792,	169563047,
ENSG00000223784.1	ENSG00000223784.1:ENST00000417112.1:chr10:+:54:257	chr10	+	6779397	6780329	6779397	6780329	2	6779397,6780318,	6779590,6780329,
ENSG00000223784.1	ENSG00000223784.1:ENST00000417112.1:chr10:+:224:253	chr10	+	6779567	6780325	6779567	6780325	2	6779567,6780318,	6779590,6780325,
ENSG00000223784.1	ENSG00000223784.1:ENST00000417112.1:chr10:+:257:304	chr10	+	6780328	6780376	6780328	6780376	1	6780328,	6780376,
ENSG00000223784.1	ENSG00000223784.1:ENST00000417112.1:chr10:+:315:488	chr10	+	6780386	6780560	6780386	6780560	1	6780386,	6780560,
ENSG00000223784.1	ENSG00000223784.1:ENST00000417112.1:chr10:+:628:678	chr10	+	6780699	6780750	6780699	6780750	1	6780699,	6780750,
ENSG00000223804.1	LOC100286793:NR_027469:chr1:-:7:222	chr1	-	143744364	143744580	143744364	143744580	1	143744364,	143744580,
ENSG00000223960.2	ENSG00000223960.2:ENST00000420672.1:chr2:+:40:66	chr2	+	179278705	179278732	179278705	179278732	1	179278705,	179278732,
ENSG00000223960.2	ENSG00000223960.2:ENST00000415236.1:chr2:+:26:61	chr2	+	179278775	179278811	179278775	179278811	1	179278775,	179278811,
ENSG00000223960.2	ENSG00000223960.2:ENST00000415236.1:chr2:+:75:116	chr2	+	179278824	179291118	179278824	179291118	2	179278824,179291092,	179278840,179291118,
ENSG00000223960.2	ENSG00000223960.2:ENST00000436616.2:chr2:+:99:149	chr2	+	179278824	179295456	179278824	179295456	2	179278824,179295421,	179278840,179295456,
ENSG00000223960.2	ENSG00000223960.2:ENST00000415236.1:chr2:+:116:127	chr2	+	179291117	179291129	179291117	179291129	1	179291117,	179291129,
ENSG00000223960.2	ENSG00000223960.2:ENST00000415236.1:chr2:+:166:216	chr2	+	179291167	179291218	179291167	179291218	1	179291167,	179291218,
ENSG00000223960.2	ENSG00000223960.2:ENST00000415236.1:chr2:+:179:286	chr2	+	179291180	179291288	179291180	179291288	1	179291180,	179291288,
ENSG00000223960.2	ENSG00000223960.2:ENST00000450044.1:chr2:+:234:419	chr2	+	179291180	179295538	179291180	179295538	2	179291180,179295404,	179291232,179295538,
ENSG00000223960.2	ENSG00000223960.2:ENST00000415236.1:chr2:+:390:470	chr2	+	179291391	179295538	179291391	179295538	2	179291391,179295496,	179291430,179295538,
ENSG00000223960.2	ENSG00000223960.2:ENST00000436616.2:chr2:+:264:353	chr2	+	179295570	179298152	179295570	179298152	2	179295570,179298108,	179295616,179298152,
ENSG00000223960.2	ENSG00000223960.2:ENST00000436616.2:chr2:+:373:531	chr2	+	179298171	179298330	179298171	179298330	1	179298171,	179298330,
ENSG00000223960.2	ENSG00000223960.2:ENST00000436616.2:chr2:+:551:772	chr2	+	179298349	179298571	179298349	179298571	1	179298349,	179298571,
ENSG00000224023.6	ENSG00000224023.6:ENST00000423178.2:chr10:-:322:525	chr10	-	127396132	127398074	127396132	127398074	2	127396132,127398066,	127396328,127398074,
ENSG00000224032.2	ENSG00000224032.2:ENST00000413221.2:chr5:+:392:460	chr5	+	111496614	111496683	111496614	111496683	1	111496614,	111496683,
ENSG00000224032.2	ENSG00000224032.2:ENST00000413221.2:chr5:+:457:618	chr5	+	111496679	111496841	111496679	111496841	1	111496679,	111496841,
ENSG00000224032.2	ENSG00000224032.2:ENST00000413221.2:chr5:+:552:701	chr5	+	111496774	111496924	111496774	111496924	1	111496774,	111496924,
ENSG00000224043.3	ENSG00000224043.3:ENST00000428857.1:chr2:-:68:379	chr2	-	135625299	135676212	135625299	135676212	4	135625299,135626513,135635089,135676132,	135625309,135626611,135635213,135676212,
ENSG00000224167.1	ENSG00000224167.1:ENST00000456651.1:chr1:+:43:198	chr1	+	113392692	113392848	113392692	113392848	1	113392692,	113392848,
ENSG00000224259.1	ENSG00000224259.1:ENST00000423943.1:chr1:+:53:76	chr1	+	159931066	159931090	159931066	159931090	1	159931066,	159931090,
ENSG00000224597.5	ENSG00000224597.5:ENST00000423223.1:chr10:+:32:76	chr10	+	29698546	29698591	29698546	29698591	1	29698546,	29698591,
ENSG00000224597.5	ENSG00000224597.5:ENST00000427063.2:chr10:+:46:162	chr10	+	29698546	29709439	29698546	29709439	3	29698546,29704285,29709419,	29698587,29704341,29709439,
ENSG00000224597.5	ENSG00000224597.5:ENST00000414457.1:chr10:+:60:203	chr10	+	29698546	29771808	29698546	29771808	3	29698546,29704285,29771761,	29698587,29704341,29771808,
ENSG00000224597.5	ENSG00000224597.5:ENST00000537908.1:chr10:+:83:202	chr10	+	29698568	29709439	29698568	29709439	3	29698568,29704285,29709419,	29698612,29704341,29709439,
ENSG00000224597.5	ENSG00000224597.5:ENST00000423223.1:chr10:+:54:200	chr10	+	29698568	29771808	29698568	29771808	3	29698568,29704285,29771761,	29698612,29704341,29771808,
ENSG00000224597.5	ENSG00000224597.5:ENST00000438202.1:chr10:+:68:322	chr10	+	29698598	29747387	29698598	29747387	3	29698598,29704285,29747202,	29698612,29704341,29747387,
ENSG00000224597.5	ENSG00000224597.5:ENST00000455774.1:chr10:+:202:411	chr10	+	29699373	29757985	29699373	29757985	3	29699373,29704285,29757848,	29699390,29704341,29757985,
ENSG00000224597.5	ENSG00000224597.5:ENST00000427063.2:chr10:+:215:295	chr10	+	29709491	29709572	29709491	29709572	1	29709491,	29709572,
ENSG00000224597.5	ENSG00000224597.5:ENST00000427063.2:chr10:+:292:387	chr10	+	29709568	29709664	29709568	29709664	1	29709568,	29709664,
ENSG00000224597.5	ENSG00000224597.5:ENST00000427063.2:chr10:+:404:496	chr10	+	29709680	29709773	29709680	29709773	1	29709680,	29709773,
ENSG00000224687.1	ENSG00000224687.1:ENST00000419458.1:chr1:-:161:481	chr1	-	178062132	178062453	178062132	178062453	1	178062132,	178062453,
ENSG00000224691.1	ENSG00000224691.1:ENST00000428391.1:chr1:-:246:263	chr1	-	186146034	186146188	186146034	186146188	2	186146034,186146176,	186146040,186146188,
ENSG00000224699.4	ENSG00000224699.4:ENST00000457535.1:chr1:+:340:498	chr1	+	110950486	110954863	110950486	110954863	2	110950486,110954794,	110950576,110954863,
ENSG00000225177.1	ENSG00000225177.1:ENST00000432673.1:chr6:+:47:187	chr6	+	139013731	139015647	139013731	139015647	2	139013731,139015529,	139013754,139015647,
ENSG00000225265.1	ENSG00000225265.1:ENST00000413074.1:chr1:+:83:244	chr1	+	222763386	222763548	222763386	222763548	1	222763386,	222763548,
ENSG00000225302.1	ENSG00000225302.1:ENST00000453491.1:chr10:-:196:366	chr10	-	118592801	118594533	118592801	118594533	2	118592801,118594445,	118592884,118594533,
ENSG00000225302.1	ENSG00000225302.1:ENST00000453491.1:chr10:-:133:162	chr10	-	118594741	118609079	118594741	118609079	2	118594741,118609076,	118594768,118609079,
ENSG00000225377.1	ENSG00000225377.1:ENST00000414676.1:chr20:-:99:191	chr20	-	303110	303203	303110	303203	1	303110,	303203,
ENSG00000225383.2	ENSG00000225383.2:ENST00000446372.2:chr10:-:322:525	chr10	-	10826568	10834383	10826568	10834383	3	10826568,10828607,10834334,	10826632,10828698,10834383,
ENSG00000225383.2	ENSG00000225383.2:ENST00000415590.2:chr10:-:212:265	chr10	-	10834351	10834405	10834351	10834405	1	10834351,	10834405,
ENSG00000225383.2	ENSG00000225383.2:ENST00000446372.2:chr10:-:163:249	chr10	-	10834455	10836714	10834455	10836714	2	10834455,10836660,	10834488,10836714,
ENSG00000225383.2	ENSG00000225383.2:ENST00000446372.2:chr10:-:86:184	chr10	-	10836692	10836791	10836692	10836791	1	10836692,	10836791,
ENSG00000225383.2	XLOC_008730:TCONS_00018435:chr10:-:51:164	chr10	-	10836842	10836956	10836842	10836956	1	10836842,	10836956,
ENSG00000225733.1	ENSG00000225733.1:ENST00000417835.1:chr3:-:711:890	chr3	-	14986925	14987105	14986925	14987105	1	14986925,	14987105,
ENSG00000225733.1	ENSG00000225733.1:ENST00000417835.1:chr3:-:224:391	chr3	-	14987424	14987592	14987424	14987592	1	14987424,	14987592,
ENSG00000225733.1	ENSG00000225733.1:ENST00000417835.1:chr3:-:172:234	chr3	-	14987581	14987644	14987581	14987644	1	14987581,	14987644,
ENSG00000225733.1	ENSG00000225733.1:ENST00000424349.1:chr3:-:115:297	chr3	-	14988716	14988899	14988716	14988899	1	14988716,	14988899,
ENSG00000225733.1	ENSG00000225733.1:ENST00000426200.1:chr3:-:370:429	chr3	-	14987643	14989561	14987643	14989561	2	14987643,14989519,	14987661,14989561,
ENSG00000225783.2	ENSG00000244625.1:ENST00000444388.1:chr22:+:243:299	chr22	+	27089665	27089722	27089665	27089722	1	27089665,	27089722,
ENSG00000225783.2	ENSG00000244625.1:ENST00000421253.1:chr22:+:172:288	chr22	+	27113255	27113372	27113255	27113372	1	27113255,	27113372,
ENSG00000225973.3	ENSG00000225973.3:ENST00000436697.2:chr15:-:257:421	chr15	-	55609825	55609990	55609825	55609990	1	55609825,	55609990,
ENSG00000225973.3	ENSG00000225973.3:ENST00000436697.2:chr15:-:201:272	chr15	-	55609974	55610046	55609974	55610046	1	55609974,	55610046,
ENSG00000225973.3	ENSG00000225973.3:ENST00000436697.2:chr15:-:89:133	chr15	-	55611109	55611154	55611109	55611154	1	55611109,	55611154,
ENSG00000225973.3	ENSG00000225973.3:ENST00000436697.2:chr15:-:34:75	chr15	-	55611167	55611209	55611167	55611209	1	55611167,	55611209,
ENSG00000226067.2	ENSG00000235999.1:ENST00000433084.1:chr1:+:1475:1540	chr1	+	149291232	149291298	149291232	149291298	1	149291232,	149291298,
ENSG00000226281.2	XLOC_005595:TCONS_00012067:chr6:-:2621:2803	chr6	-	6695007	6695190	6695007	6695190	1	6695007,	6695190,
ENSG00000226287.3	ENSG00000226287.3:ENST00000422715.1:chr22:+:139:468	chr22	+	21057974	21058520	21057974	21058520	2	21057974,21058255,	21058039,21058520,
ENSG00000226287.3	ENSG00000226287.3:ENST00000442222.1:chr22:+:353:454	chr22	+	21058277	21058608	21058277	21058608	3	21058277,21058475,21058598,	21058328,21058516,21058608,
ENSG00000226328.2	ENSG00000226328.2:ENST00000426282.2:chr22:-:424:594	chr22	-	45530381	45530552	45530381	45530552	1	45530381,	45530552,
ENSG00000226328.2	ENSG00000226328.2:ENST00000426282.2:chr22:-:220:393	chr22	-	45530582	45534782	45530582	45534782	2	45530582,45534704,	45530678,45534782,
ENSG00000226377.1	ENSG00000226377.1:ENST00000435733.1:chr17:+:25:213	chr17	+	31203801	31204940	31203801	31204940	2	31203801,31204861,	31203911,31204940,
ENSG00000226380.3	ENSG00000226380.3:ENST00000432045.2:chr7:-:422:511	chr7	-	130567466	130569136	130567466	130569136	2	130567466,130569075,	130567495,130569136,
ENSG00000226380.3	ENSG00000226380.3:ENST00000418546.1:chr7:-:309:377	chr7	-	130569067	130569136	130569067	130569136	1	130569067,	130569136,
ENSG00000226380.3	ENSG00000226380.3:ENST00000418546.1:chr7:-:138:203	chr7	-	130597752	130597818	130597752	130597818	1	130597752,	130597818,
ENSG00000226419.2	ENSG00000226419.2:ENST00000416193.1:chr1:+:186:413	chr1	+	113499222	113499450	113499222	113499450	1	113499222,	113499450,
ENSG00000226471.2	ENSG00000226471.2:ENST00000458080.1:chr22:+:17:199	chr22	+	29196687	29218104	29196687	29218104	2	29196687,29217959,	29196725,29218104,
ENSG00000226752.3	ENSG00000226752.3:ENST00000442982.1:chr9:+:17:253	chr9	+	123605394	123605631	123605394	123605631	1	123605394,	123605631,
ENSG00000226752.3	ENSG00000226752.3:ENST00000442982.1:chr9:+:181:417	chr9	+	123605558	123607348	123605558	123607348	2	123605558,123607270,	123605717,123607348,
ENSG00000226853.2	ENSG00000226853.2:ENST00000417038.1:chr2:+:152:373	chr2	+	175352787	175353009	175352787	175353009	1	175352787,	175353009,
ENSG00000227036.2	ENSG00000227036.2:ENST00000453722.2:chr17:-:239:565	chr17	-	70588377	70588704	70588377	70588704	1	70588377,	70588704,
ENSG00000227036.2	ENSG00000227036.2:ENST00000453722.2:chr17:-:140:163	chr17	-	70588779	70588803	70588779	70588803	1	70588779,	70588803,
ENSG00000227036.2	ENSG00000227036.2:ENST00000453722.2:chr17:-:27:125	chr17	-	70588817	70588916	70588817	70588916	1	70588817,	70588916,
ENSG00000227186.1	ENSG00000227186.1:ENST00000436608.1:chr10:-:57:161	chr10	-	76783450	76783952	76783450	76783952	2	76783450,76783900,	76783503,76783952,
ENSG00000227214.2	ENSG00000227214.2:ENST00000438190.1:chr6:+:173:274	chr6	+	28954232	28954504	28954232	28954504	2	28954232,28954453,	28954283,28954504,
ENSG00000227372.6	ENSG00000227372.6:ENST00000418088.1:chr1:-:34:252	chr1	-	3663087	3663306	3663087	3663306	1	3663087,	3663306,
ENSG00000227403.1	ENSG00000227403.1:ENST00000436506.1:chr2:+:32:145	chr2	+	162101297	162101939	162101297	162101939	2	162101297,162101934,	162101406,162101939,
ENSG00000227403.1	ENSG00000227403.1:ENST00000439050.1:chr2:+:48:239	chr2	+	162101297	162103468	162101297	162103468	2	162101297,162103385,	162101406,162103468,
ENSG00000227496.1	ENSG00000227496.1:ENST00000448264.1:chr1:+:81:230	chr1	+	225888386	225888536	225888386	225888536	1	225888386,	225888536,
ENSG00000227744.4	ENSG00000227744.4:ENST00000455228.1:chr2:-:3111:3332	chr2	-	239841153	239842226	239841153	239842226	3	239841153,239841423,239842183,	239841212,239841543,239842226,
ENSG00000227946.1	ENSG00000227946.1:ENST00000420509.1:chr2:+:29:298	chr2	+	206949357	206950835	206949357	206950835	2	206949357,206950680,	206949472,206950835,
ENSG00000227946.1	ENSG00000227946.1:ENST00000420509.1:chr2:+:647:730	chr2	+	206951183	206951267	206951183	206951267	1	206951183,	206951267,
ENSG00000228065.6	ENSG00000228065.6:ENST00000599409.1:chr10:+:153:206	chr10	+	67330412	67330466	67330412	67330466	1	67330412,	67330466,
ENSG00000228065.6	ENSG00000228065.6:ENST00000433152.4:chr10:+:321:404	chr10	+	67331295	67332734	67331295	67332734	2	67331295,67332692,	67331337,67332734,
ENSG00000228065.6	ENSG00000228065.6:ENST00000593568.1:chr10:+:877:957	chr10	+	67345292	67375441	67345292	67375441	2	67345292,67375393,	67345325,67375441,
ENSG00000228192.3	ENSG00000228192.3:ENST00000425076.1:chr1:-:2:106	chr1	-	43311951	43312056	43311951	43312056	1	43311951,	43312056,
ENSG00000228223.1	ENSG00000228223.1:ENST00000411553.1:chr6:+:94:444	chr6	+	26522169	26522520	26522169	26522520	1	26522169,	26522520,
ENSG00000228265.1	ENSG00000228265.1:ENST00000419662.1:chr20:-:184:237	chr20	-	32580626	32580680	32580626	32580680	1	32580626,	32580680,
ENSG00000228274.3	ENSG00000228274.3:ENST00000422408.2:chr22:-:666:968	chr22	-	39063977	39064280	39063977	39064280	1	39063977,	39064280,
ENSG00000228274.3	ENSG00000228274.3:ENST00000412067.1:chr22:-:44:247	chr22	-	39072308	39077748	39072308	39077748	2	39072308,39077730,	39072494,39077748,
ENSG00000228274.3	ENSG00000228274.3:ENST00000412067.1:chr22:-:12:239	chr22	-	39072316	39077780	39072316	39077780	2	39072316,39077730,	39072494,39077780,
ENSG00000228288.2	ENSG00000228288.2:ENST00000425295.1:chr1:+:335:538	chr1	+	202780424	202780946	202780424	202780946	2	202780424,202780816,	202780498,202780946,
ENSG00000228340.1	ENSG00000228340.1:ENST00000427691.1:chr20:+:336:428	chr20	+	58696153	58729531	58696153	58729531	2	58696153,58729462,	58696177,58729531,
ENSG00000228393.3	ENSG00000228393.3:ENST00000445184.1:chr7:-:22:324	chr7	-	104622906	104653449	104622906	104653449	2	104622906,104653378,	104623138,104653449,
ENSG00000228393.3	LOC100216545:NR_024586:chr7:-:548:778	chr7	-	104653809	104654040	104653809	104654040	1	104653809,	104654040,
ENSG00000228630.1	ENSG00000228630.1:ENST00000424518.1:chr12:-:470:637	chr12	-	54357874	54359828	54357874	54359828	3	54357874,54358014,54359747,	54357908,54358067,54359828,
ENSG00000228630.1	ENSG00000228630.1:ENST00000425595.1:chr12:-:168:263	chr12	-	54357893	54359828	54357893	54359828	2	54357893,54359747,	54357908,54359828,
ENSG00000228649.4	ENSG00000228649.4:ENST00000415611.3:chr7:+:121:150	chr7	+	22896158	22896604	22896158	22896604	2	22896158,22896591,	22896175,22896604,
ENSG00000228649.4	ENSG00000228649.4:ENST00000415611.3:chr7:+:232:315	chr7	+	22898239	22898323	22898239	22898323	1	22898239,	22898323,
ENSG00000228794.4	ENSG00000228794.4:ENST00000415295.1:chr1:+:223:258	chr1	+	776729	776765	776729	776765	1	776729,	776765,
ENSG00000228794.4	ENSG00000228794.4:ENST00000416570.1:chr1:+:197:472	chr1	+	783051	787447	783051	787447	2	783051,787306,	783186,787447,
ENSG00000228801.5	ENSG00000228801.5:ENST00000518942.1:chr8:+:117:278	chr8	+	52812001	52812163	52812001	52812163	1	52812001,	52812163,
ENSG00000228801.5	ENSG00000228801.5:ENST00000518942.1:chr8:+:304:450	chr8	+	52812188	52812335	52812188	52812335	1	52812188,	52812335,
ENSG00000228812.3	ENSG00000228812.3:ENST00000456721.2:chr20:+:12:164	chr20	+	60928062	60928215	60928062	60928215	1	60928062,	60928215,
ENSG00000228989.1	XLOC_l2_007832:TCONS_l2_00014330:chr2:+:201:332	chr2	+	242626703	242626835	242626703	242626835	1	242626703,	242626835,
ENSG00000229043.2	ENSG00000229043.2:ENST00000422230.1:chr7:+:120:278	chr7	+	1200249	1203945	1200249	1203945	2	1200249,1203796,	1200259,1203945,
ENSG00000229043.2	ENSG00000229043.2:ENST00000413706.1:chr7:+:81:260	chr7	+	1202035	1202356	1202035	1202356	2	1202035,1202320,	1202179,1202356,
ENSG00000229043.2	ENSG00000229043.2:ENST00000423008.1:chr7:+:254:442	chr7	+	1203091	1203945	1203091	1203945	2	1203091,1203796,	1203131,1203945,
ENSG00000229043.2	ENSG00000229043.2:ENST00000423008.1:chr7:+:286:366	chr7	+	1203123	1203869	1203123	1203869	2	1203123,1203796,	1203131,1203869,
ENSG00000229619.3	ENSG00000229619.3:ENST00000445466.2:chr3:-:257:649	chr3	-	151986319	151986712	151986319	151986712	1	151986319,	151986712,
ENSG00000229619.3	ENSG00000229619.3:ENST00000445466.2:chr3:-:18:371	chr3	-	151986597	151987317	151986597	151987317	2	151986597,151987227,	151986861,151987317,
ENSG00000229647.1	ENSG00000229647.1:ENST00000440326.1:chr2:+:46:51	chr2	+	208104419	208104425	208104419	208104425	1	208104419,	208104425,
ENSG00000229647.1	ENSG00000229647.1:ENST00000440326.1:chr2:+:82:150	chr2	+	208104455	208104524	208104455	208104524	1	208104455,	208104524,
ENSG00000229647.1	ENSG00000229647.1:ENST00000430494.1:chr2:+:93:125	chr2	+	208104627	208104660	208104627	208104660	1	208104627,	208104660,
ENSG00000229647.1	ENSG00000229647.1:ENST00000430494.1:chr2:+:126:257	chr2	+	208104660	208104792	208104660	208104792	1	208104660,	208104792,
ENSG00000229647.1	ENSG00000229647.1:ENST00000440326.1:chr2:+:488:718	chr2	+	208104861	208110225	208104861	208110225	2	208104861,208110012,	208104879,208110225,
ENSG00000229647.1	ENSG00000229647.1:ENST00000430494.1:chr2:+:869:955	chr2	+	208110506	208110593	208110506	208110593	1	208110506,	208110593,
ENSG00000229656.2	ENSG00000229656.2:ENST00000414157.1:chr10:+:127:237	chr10	+	33271595	33274643	33271595	33274643	2	33271595,33274550,	33271613,33274643,
ENSG00000229666.1	ENSG00000229666.1:ENST00000451496.1:chr5:-:58:225	chr5	-	66297761	66299723	66297761	66299723	2	66297761,66299671,	66297877,66299723,
ENSG00000229807.5	ENSG00000229807.5:ENST00000429829.1:chrX:-:764:880	chrX	-	73071707	73071824	73071707	73071824	1	73071707,	73071824,
ENSG00000229950.1	ENSG00000229950.1:ENST00000443546.1:chr6:+:115:492	chr6	+	10414925	10415538	10414925	10415538	2	10414925,10415519,	10415284,10415538,
ENSG00000229950.1	ENSG00000229950.1:ENST00000420777.1:chr6:+:211:459	chr6	+	10415066	10415564	10415066	10415564	2	10415066,10415533,	10415284,10415564,
ENSG00000229953.1	ENSG00000229953.1:ENST00000448869.1:chr1:-:391:633	chr1	-	156616422	156616665	156616422	156616665	1	156616422,	156616665,
ENSG00000229953.1	ENSG00000229953.1:ENST00000448869.1:chr1:-:74:205	chr1	-	156616850	156631142	156616850	156631142	2	156616850,156631106,	156616946,156631142,
ENSG00000230074.1	ENSG00000230074.1:ENST00000434627.1:chr9:+:179:364	chr9	+	34678172	34680995	34678172	34680995	2	34678172,34680902,	34678265,34680995,
ENSG00000230082.1	ENSG00000230082.1:ENST00000431558.1:chr3:+:4:123	chr3	+	9989091	9989211	9989091	9989211	1	9989091,	9989211,
ENSG00000230082.1	ENSG00000230082.1:ENST00000431558.1:chr3:+:26:253	chr3	+	9989113	9989803	9989113	9989803	2	9989113,9989750,	9989288,9989803,
ENSG00000230082.1	ENSG00000230082.1:ENST00000431558.1:chr3:+:244:417	chr3	+	9989793	9990141	9989793	9990141	2	9989793,9990038,	9989864,9990141,
ENSG00000230337.1	ENSG00000230337.1:ENST00000447600.1:chr1:+:75:239	chr1	+	11159806	11161861	11159806	11161861	2	11159806,11161857,	11159967,11161861,
ENSG00000230337.1	ENSG00000230337.1:ENST00000447600.1:chr1:+:166:381	chr1	+	11159897	11162003	11159897	11162003	2	11159897,11161857,	11159967,11162003,
ENSG00000230487.3	ENSG00000230487.3:ENST00000457484.2:chr7:+:130:456	chr7	+	1609854	1614362	1609854	1614362	2	1609854,1614350,	1610169,1614362,
ENSG00000230487.3	ENSG00000230487.3:ENST00000437621.2:chr7:+:278:427	chr7	+	1614421	1615494	1614421	1615494	2	1614421,1615422,	1614499,1615494,
ENSG00000230513.1	ENSG00000230513.1:ENST00000429962.1:chr22:+:433:531	chr22	+	21356643	21356742	21356643	21356742	1	21356643,	21356742,
ENSG00000230555.2	XLOC_008467:TCONS_00018175:chr10:+:79:333	chr10	+	43916115	43916370	43916115	43916370	1	43916115,	43916370,
ENSG00000230615.2	ENSG00000230615.2:ENST00000431800.1:chr1:+:63:107	chr1	+	44514111	44514156	44514111	44514156	1	44514111,	44514156,
ENSG00000230812.1	ENSG00000230812.1:ENST00000447329.1:chr1:+:175:225	chr1	+	59486233	59486284	59486233	59486284	1	59486233,	59486284,
ENSG00000230844.2	ENSG00000230844.2:ENST00000421685.2:chrX:+:52:276	chrX	+	46404979	46406042	46404979	46406042	2	46404979,46405900,	46405062,46406042,
ENSG00000231131.2	ENSG00000231131.2:ENST00000422763.1:chr10:-:202:357	chr10	-	54214353	54214509	54214353	54214509	1	54214353,	54214509,
ENSG00000231131.2	ENSG00000231131.2:ENST00000435813.2:chr10:-:134:148	chr10	-	54214883	54214898	54214883	54214898	1	54214883,	54214898,
ENSG00000231131.2	ENSG00000231131.2:ENST00000435813.2:chr10:-:7:24	chr10	-	54215007	54215025	54215007	54215025	1	54215007,	54215025,
ENSG00000231312.2	ENSG00000231312.2:ENST00000445520.1:chr2:+:205:342	chr2	+	39681444	39701743	39681444	39701743	2	39681444,39701667,	39681506,39701743,
ENSG00000231365.1	ENSG00000231365.1:ENST00000425884.1:chr1:+:103:192	chr1	+	119683121	119683211	119683121	119683211	1	119683121,	119683211,
ENSG00000231365.1	ENSG00000231365.1:ENST00000425884.1:chr1:+:279:425	chr1	+	119683297	119689603	119683297	119689603	2	119683297,119689575,	119683416,119689603,
ENSG00000231365.1	ENSG00000231365.1:ENST00000440150.1:chr1:+:294:524	chr1	+	119683341	119693343	119683341	119693343	2	119683341,119693187,	119683416,119693343,
ENSG00000231365.1	ENSG00000231365.1:ENST00000413531.1:chr1:+:152:403	chr1	+	119689596	119693343	119689596	119693343	2	119689596,119693187,	119689692,119693343,
ENSG00000231770.1	ENSG00000231770.1:ENST00000453671.1:chr3:+:25:54	chr3	+	194304764	194304794	194304764	194304794	1	194304764,	194304794,
ENSG00000231770.1	ENSG00000231770.1:ENST00000447982.1:chr3:+:5:76	chr3	+	194304915	194304987	194304915	194304987	1	194304915,	194304987,
ENSG00000231856.1	ENSG00000231856.1:ENST00000456688.1:chr13:+:119:199	chr13	+	52378551	52378632	52378551	52378632	1	52378551,	52378632,
ENSG00000231889.3	TRAF3IP2-AS1:NR_034108:chr6:+:31:177	chr6	+	111804705	111804852	111804705	111804852	1	111804705,	111804852,
ENSG00000231890.3	ENSG00000231890.3:ENST00000609663.1:chr2:+:22:162	chr2	+	136751434	136756384	136751434	136756384	2	136751434,136756256,	136751447,136756384,
ENSG00000231890.3	ENSG00000231890.3:ENST00000438432.1:chr2:+:359:535	chr2	+	136756317	136764810	136756317	136764810	3	136756317,136758008,136764765,	136756408,136758049,136764810,
ENSG00000232098.2	ENSG00000232098.2:ENST00000597980.1:chr19:-:45:131	chr19	-	58919719	58919806	58919719	58919806	1	58919719,	58919806,
ENSG00000232388.2	ENSG00000232388.2:ENST00000608034.1:chr20:+:32:253	chr20	+	18548122	18549383	18548122	18549383	2	18548122,18549279,	18548240,18549383,
ENSG00000232388.2	ENSG00000232388.2:ENST00000411646.1:chr20:+:59:346	chr20	+	18548122	18550049	18548122	18550049	2	18548122,18549879,	18548240,18550049,
ENSG00000232388.2	ENSG00000232388.2:ENST00000411646.1:chr20:+:351:428	chr20	+	18550053	18550131	18550053	18550131	1	18550053,	18550131,
ENSG00000232442.1	ENSG00000232442.1:ENST00000449500.1:chr20:+:96:338	chr20	+	62258675	62259715	62258675	62259715	2	62258675,62259542,	62258745,62259715,
ENSG00000232445.1	ENSG00000232445.1:ENST00000419422.1:chr7:+:261:635	chr7	+	100953822	100954197	100953822	100954197	1	100953822,	100954197,
ENSG00000232527.3	ENSG00000232527.3:ENST00000457390.1:chr1:+:55:288	chr1	+	148932839	148933443	148932839	148933443	2	148932839,148933290,	148932920,148933443,
ENSG00000232527.3	XLOC_l2_000416:TCONS_l2_00000581:chr1:+:117:542	chr1	+	148932839	148951276	148932839	148951276	3	148932839,148933290,148951009,	148932920,148933368,148951276,
ENSG00000232527.3	ENSG00000232527.3:ENST00000452399.1:chr1:+:118:252	chr1	+	148932839	148951298	148932839	148951298	2	148932839,148951244,	148932920,148951298,
ENSG00000232527.3	LOC645166:NR_027354:chr1:+:227:445	chr1	+	148932839	148952396	148932839	148952396	3	148932839,148933290,148952336,	148932920,148933368,148952396,
ENSG00000232533.1	ENSG00000232533.1:ENST00000429630.1:chr7:-:1:246	chr7	-	143077185	143077587	143077185	143077587	2	143077185,143077358,	143077202,143077587,
ENSG00000232613.2	XLOC_002133:TCONS_00004287:chr2:-:119:367	chr2	-	65275247	65283198	65275247	65283198	2	65275247,65283048,	65275346,65283198,
ENSG00000232656.3	ENSG00000232656.3:ENST00000428780.2:chr10:+:313:585	chr10	+	1082762	1089670	1082762	1089670	2	1082762,1089468,	1082833,1089670,
ENSG00000232677.2	ENSG00000232677.2:ENST00000449434.2:chr19:-:137:259	chr19	-	36812232	36821212	36812232	36821212	3	36812232,36812894,36821154,	36812259,36812932,36821212,
ENSG00000232677.2	ENSG00000232677.2:ENST00000412740.2:chr19:-:182:400	chr19	-	36812232	36821212	36812232	36821212	4	36812232,36812894,36813031,36821154,	36812259,36812932,36813127,36821212,
ENSG00000232677.2	XLOC_l2_007033:TCONS_l2_00013084:chr19:-:468:836	chr19	-	36816355	36821212	36816355	36821212	2	36816355,36821154,	36816666,36821212,
ENSG00000232677.2	XLOC_l2_007033:TCONS_l2_00013081:chr19:-:467:817	chr19	-	36817779	36821212	36817779	36821212	2	36817779,36821154,	36818072,36821212,
ENSG00000232677.2	ENSG00000232677.2:ENST00000591372.1:chr19:-:385:462	chr19	-	36818107	36821212	36818107	36821212	2	36818107,36821154,	36818127,36821212,
ENSG00000232677.2	XLOC_l2_007033:TCONS_l2_00013080:chr19:-:395:592	chr19	-	36816721	36821284	36816721	36821284	2	36816721,36821154,	36816789,36821284,
ENSG00000232677.2	ENSG00000232677.2:ENST00000438368.2:chr19:-:65:223	chr19	-	36822386	36822545	36822386	36822545	1	36822386,	36822545,
ENSG00000232807.2	ENSG00000232807.2:ENST00000397264.4:chr10:-:73:243	chr10	-	5987619	5987790	5987619	5987790	1	5987619,	5987790,
ENSG00000232907.3	ENSG00000232907.3:ENST00000559455.1:chr20:-:472:483	chr20	-	35190709	35190721	35190709	35190721	1	35190709,	35190721,
ENSG00000232956.4	ENSG00000232956.4:ENST00000578968.1:chr7:-:441:614	chr7	-	45023487	45023971	45023487	45023971	2	45023487,45023955,	45023645,45023971,
ENSG00000232956.4	ENSG00000232956.4:ENST00000584686.1:chr7:-:319:408	chr7	-	45023976	45025521	45023976	45025521	2	45023976,45025480,	45024025,45025521,
ENSG00000232956.4	ENSG00000232956.4:ENST00000578968.1:chr7:-:379:435	chr7	-	45023976	45025627	45023976	45025627	2	45023976,45025619,	45024025,45025627,
ENSG00000232956.4	ENSG00000232956.4:ENST00000577700.1:chr7:-:609:620	chr7	-	45025615	45025627	45025615	45025627	1	45025615,	45025627,
ENSG00000232956.4	ENSG00000232956.4:ENST00000579383.1:chr7:-:132:239	chr7	-	45023614	45025696	45023614	45025696	2	45023614,45025619,	45023645,45025696,
ENSG00000232956.4	ENSG00000232956.4:ENST00000438705.3:chr7:-:8:76	chr7	-	45023614	45026161	45023614	45026161	2	45023614,45026123,	45023645,45026161,
ENSG00000232956.4	ENSG00000232956.4:ENST00000580458.1:chr7:-:88:174	chr7	-	45023976	45026161	45023976	45026161	2	45023976,45026123,	45024025,45026161,
ENSG00000232956.4	ENSG00000232956.4:ENST00000578968.1:chr7:-:272:331	chr7	-	45025674	45026161	45025674	45026161	2	45025674,45026123,	45025696,45026161,
ENSG00000233016.2	SNHG7:NR_024542:chr9:-:465:809	chr9	-	139619203	139619548	139619203	139619548	1	139619203,	139619548,
ENSG00000233016.2	ENSG00000233016.2:ENST00000414282.1:chr9:-:201:404	chr9	-	139620808	139622435	139620808	139622435	3	139620808,139621497,139622332,	139620868,139621538,139622435,
ENSG00000233016.2	ENSG00000233016.2:ENST00000447221.1:chr9:-:201:395	chr9	-	139621446	139622435	139621446	139622435	2	139621446,139622332,	139621538,139622435,
ENSG00000233137.2	ENSG00000233137.2:ENST00000592157.1:chr9:+:76:105	chr9	+	37080009	37086676	37080009	37086676	2	37080009,37086664,	37080027,37086676,
ENSG00000233137.2	ENSG00000233137.2:ENST00000429493.1:chr9:+:141:221	chr9	+	37080033	37080114	37080033	37080114	1	37080033,	37080114,
ENSG00000233137.2	ENSG00000233137.2:ENST00000588403.1:chr9:+:417:566	chr9	+	37080426	37084238	37080426	37084238	2	37080426,37084195,	37080533,37084238,
ENSG00000233137.2	ENSG00000233137.2:ENST00000429493.1:chr9:+:700:843	chr9	+	37086723	37086867	37086723	37086867	1	37086723,	37086867,
ENSG00000233137.2	ENSG00000233137.2:ENST00000429493.1:chr9:+:919:942	chr9	+	37086942	37086966	37086942	37086966	1	37086942,	37086966,
ENSG00000233137.2	ENSG00000233137.2:ENST00000429493.1:chr9:+:985:1092	chr9	+	37087008	37087116	37087008	37087116	1	37087008,	37087116,
ENSG00000233137.2	ENSG00000233137.2:ENST00000429493.1:chr9:+:1005:1124	chr9	+	37087028	37087148	37087028	37087148	1	37087028,	37087148,
ENSG00000233137.2	ENSG00000233137.2:ENST00000429493.1:chr9:+:1265:1303	chr9	+	37087288	37087327	37087288	37087327	1	37087288,	37087327,
ENSG00000233137.2	ENSG00000233137.2:ENST00000429493.1:chr9:+:1371:1454	chr9	+	37087394	37087478	37087394	37087478	1	37087394,	37087478,
ENSG00000233137.2	ENSG00000233137.2:ENST00000429493.1:chr9:+:1399:1488	chr9	+	37087422	37087512	37087422	37087512	1	37087422,	37087512,
ENSG00000233137.2	ENSG00000233137.2:ENST00000429493.1:chr9:+:1540:1731	chr9	+	37087563	37087755	37087563	37087755	1	37087563,	37087755,
ENSG00000233137.2	ENSG00000233137.2:ENST00000429493.1:chr9:+:2214:2372	chr9	+	37088237	37088396	37088237	37088396	1	37088237,	37088396,
ENSG00000233184.2	ENSG00000233184.2:ENST00000446527.1:chr1:+:113:121	chr1	+	101491587	101491596	101491587	101491596	1	101491587,	101491596,
ENSG00000233184.2	ENSG00000233184.2:ENST00000416329.1:chr1:+:59:166	chr1	+	101538245	101538353	101538245	101538353	1	101538245,	101538353,
ENSG00000233184.2	ENSG00000233184.2:ENST00000446527.1:chr1:+:168:260	chr1	+	101540975	101541068	101540975	101541068	1	101540975,	101541068,
ENSG00000233184.2	ENSG00000233184.2:ENST00000449473.1:chr1:+:864:917	chr1	+	101550696	101552444	101550696	101552444	2	101550696,101552407,	101550713,101552444,
ENSG00000233184.2	ENSG00000233184.2:ENST00000449473.1:chr1:+:1014:1274	chr1	+	101552540	101552801	101552540	101552801	1	101552540,	101552801,
ENSG00000233251.3	ENSG00000233251.3:ENST00000447423.2:chr2:-:736:1149	chr2	-	56403158	56406851	56403158	56406851	3	56403158,56404697,56406737,	56403285,56404870,56406851,
ENSG00000233251.3	ENSG00000233251.3:ENST00000596663.1:chr2:-:63:584	chr2	-	56403158	56411980	56403158	56411980	3	56403158,56404697,56411758,	56403285,56404870,56411980,
ENSG00000233368.2	ENSG00000233368.2:ENST00000447883.2:chr1:-:11:340	chr1	-	149576955	149577285	149576955	149577285	1	149576955,	149577285,
ENSG00000233396.3	ENSG00000233396.3:ENST00000419817.1:chr1:-:72:152	chr1	-	145382209	145382290	145382209	145382290	1	145382209,	145382290,
ENSG00000233429.5	ENSG00000233429.5:ENST00000425358.2:chr7:+:11:166	chr7	+	27135862	27138703	27135862	27138703	2	27135862,27138692,	27136007,27138703,
ENSG00000233429.5	ENSG00000233429.5:ENST00000429611.3:chr7:+:120:410	chr7	+	27135862	27138862	27135862	27138862	2	27135862,27138716,	27136007,27138862,
ENSG00000233429.5	ENSG00000233429.5:ENST00000434063.3:chr7:+:150:425	chr7	+	27135862	27139528	27135862	27139528	2	27135862,27139397,	27136007,27139528,
ENSG00000233429.5	ENSG00000233429.5:ENST00000425358.2:chr7:+:141:173	chr7	+	27135992	27138710	27135992	27138710	2	27135992,27138692,	27136007,27138710,
ENSG00000233429.5	ENSG00000233429.5:ENST00000434063.3:chr7:+:280:309	chr7	+	27135992	27139412	27135992	27139412	2	27135992,27139397,	27136007,27139412,
ENSG00000233429.5	ENSG00000233429.5:ENST00000425358.2:chr7:+:503:571	chr7	+	27139451	27139520	27139451	27139520	1	27139451,	27139520,
ENSG00000233461.1	ENSG00000233461.1:ENST00000416221.1:chr1:-:240:371	chr1	-	231658226	231658358	231658226	231658358	1	231658226,	231658358,
ENSG00000233461.1	ENSG00000233461.1:ENST00000454631.1:chr1:-:317:349	chr1	-	231658370	231660191	231658370	231660191	2	231658370,231660171,	231658383,231660191,
ENSG00000233461.1	ENSG00000233461.1:ENST00000416221.1:chr1:-:199:243	chr1	-	231658354	231663099	231658354	231663099	2	231658354,231663083,	231658383,231663099,
ENSG00000233461.1	ENSG00000233461.1:ENST00000440665.1:chr1:-:6:251	chr1	-	231658370	231663995	231658370	231663995	4	231658370,231663083,231663511,231663867,	231658383,231663161,231663538,231663995,
ENSG00000233461.1	XLOC_001257:TCONS_00001870:chr1:-:87:296	chr1	-	231663079	231663995	231663079	231663995	2	231663079,231663867,	231663161,231663995,
ENSG00000233461.1	ENSG00000233461.1:ENST00000416221.1:chr1:-:84:227	chr1	-	231658370	231664218	231658370	231664218	3	231658370,231663083,231664165,	231658383,231663161,231664218,
ENSG00000233461.1	ENSG00000233461.1:ENST00000454631.1:chr1:-:84:320	chr1	-	231660187	231664218	231660187	231664218	3	231660187,231663083,231664165,	231660293,231663161,231664218,
ENSG00000233461.1	ENSG00000233461.1:ENST00000425412.1:chr1:-:29:163	chr1	-	231663079	231664218	231663079	231664218	2	231663079,231664165,	231663161,231664218,
ENSG00000233461.1	ENSG00000233461.1:ENST00000416221.1:chr1:-:62:76	chr1	-	231664225	231664240	231664225	231664240	1	231664225,	231664240,
ENSG00000233527.4	ENSG00000233527.4:ENST00000475219.2:chr19:+:274:513	chr19	+	37064245	37065780	37064245	37065780	2	37064245,37065722,	37064427,37065780,
ENSG00000233532.1	ENSG00000233532.1:ENST00000435024.1:chr13:+:33:86	chr13	+	107028943	107028997	107028943	107028997	1	107028943,	107028997,
ENSG00000233532.1	ENSG00000233532.1:ENST00000435024.1:chr13:+:83:136	chr13	+	107028993	107029248	107028993	107029248	2	107028993,107029214,	107029013,107029248,
ENSG00000233532.1	ENSG00000233532.1:ENST00000444865.1:chr13:+:54:167	chr13	+	107029193	107029307	107029193	107029307	1	107029193,	107029307,
ENSG00000233532.1	ENSG00000233532.1:ENST00000439790.1:chr13:+:177:401	chr13	+	107029288	107029628	107029288	107029628	2	107029288,107029547,	107029432,107029628,
ENSG00000233532.1	ENSG00000233532.1:ENST00000435024.1:chr13:+:177:395	chr13	+	107029288	107030330	107029288	107030330	2	107029288,107030255,	107029432,107030330,
ENSG00000233621.1	ENSG00000233621.1:ENST00000424989.1:chr1:-:443:685	chr1	-	37921188	37921431	37921188	37921431	1	37921188,	37921431,
ENSG00000233621.1	ENSG00000233621.1:ENST00000424989.1:chr1:-:283:480	chr1	-	37921393	37922045	37921393	37922045	2	37921393,37921967,	37921513,37922045,
ENSG00000233621.1	XLOC_000787:TCONS_00001457:chr1:-:165:293	chr1	-	37921393	37939753	37921393	37939753	2	37921393,37939744,	37921513,37939753,
ENSG00000233621.1	ENSG00000233621.1:ENST00000424989.1:chr1:-:228:365	chr1	-	37921508	37939784	37921508	37939784	3	37921508,37921967,37939744,	37921513,37922060,37939784,
ENSG00000233621.1	ENSG00000233621.1:ENST00000424989.1:chr1:-:91:114	chr1	-	37939897	37939921	37939897	37939921	1	37939897,	37939921,
ENSG00000233757.2	XLOC_l2_007433:TCONS_l2_00013801:chr2:+:80:1534	chr2	+	95877371	95881351	95877371	95881351	3	95877371,95877940,95880083,	95877468,95878030,95881351,
ENSG00000233766.3	ENSG00000233766.3:ENST00000424116.2:chr2:+:109:267	chr2	+	192711373	192899454	192711373	192899454	2	192711373,192899419,	192711497,192899454,
ENSG00000233864.3	ENSG00000233864.3:ENST00000417071.1:chrY:+:233:304	chrY	+	14798457	14798529	14798457	14798529	1	14798457,	14798529,
ENSG00000233864.3	ENSG00000233864.3:ENST00000440408.1:chrY:+:657:788	chrY	+	14799535	14799667	14799535	14799667	1	14799535,	14799667,
ENSG00000233901.1	ENSG00000233901.1:ENST00000427109.1:chr9:+:91:132	chr9	+	132094669	132094711	132094669	132094711	1	132094669,	132094711,
ENSG00000233901.1	ENSG00000233901.1:ENST00000427109.1:chr9:+:213:221	chr9	+	132096292	132096301	132096292	132096301	1	132096292,	132096301,
ENSG00000233901.1	ENSG00000233901.1:ENST00000427109.1:chr9:+:280:288	chr9	+	132096359	132096368	132096359	132096368	1	132096359,	132096368,
ENSG00000233901.1	ENSG00000233901.1:ENST00000436710.1:chr9:+:199:462	chr9	+	132096383	132104058	132096383	132104058	3	132096383,132101070,132104014,	132096477,132101196,132104058,
ENSG00000233901.1	XLOC_l2_015034:TCONS_l2_00029059:chr9:+:201:563	chr9	+	132096383	132104256	132096383	132104256	3	132096383,132101070,132104113,	132096477,132101196,132104256,
ENSG00000233901.1	ENSG00000233901.1:ENST00000444125.1:chr9:+:98:373	chr9	+	132099255	132104152	132099255	132104152	3	132099255,132101070,132104014,	132099267,132101196,132104152,
ENSG00000233937.2	ENSG00000233937.2:ENST00000506340.1:chr5:+:23:304	chr5	+	180673547	180673829	180673547	180673829	1	180673547,	180673829,
ENSG00000233937.2	ENSG00000248275.1:ENST00000509252.1:chr5:+:165:206	chr5	+	180690632	180690674	180690632	180690674	1	180690632,	180690674,
ENSG00000233937.2	ENSG00000248275.1:ENST00000433265.3:chr5:+:20:196	chr5	+	180690654	180691116	180690654	180691116	2	180690654,180691052,	180690767,180691116,
ENSG00000233937.2	ENSG00000248275.1:ENST00000514146.1:chr5:+:337:426	chr5	+	180690792	180690882	180690792	180690882	1	180690792,	180690882,
ENSG00000233937.2	ENSG00000248275.1:ENST00000514146.1:chr5:+:465:629	chr5	+	180690920	180691085	180690920	180691085	1	180690920,	180691085,
ENSG00000234076.1	ENSG00000234076.1:ENST00000444488.1:chr3:-:116:301	chr3	-	188665126	188665312	188665126	188665312	1	188665126,	188665312,
ENSG00000234171.1	ENSG00000234171.1:ENST00000426725.1:chr2:+:160:249	chr2	+	3606327	3606417	3606327	3606417	1	3606327,	3606417,
ENSG00000234171.1	ENSG00000234171.1:ENST00000426725.1:chr2:+:212:244	chr2	+	3606379	3606412	3606379	3606412	1	3606379,	3606412,
ENSG00000234171.1	ENSG00000234171.1:ENST00000438436.1:chr2:+:516:686	chr2	+	3607046	3607217	3607046	3607217	1	3607046,	3607217,
ENSG00000234171.1	ENSG00000234171.1:ENST00000438436.1:chr2:+:786:923	chr2	+	3607316	3609041	3607316	3609041	2	3607316,3608906,	3607319,3609041,
ENSG00000234264.1	ENSG00000234264.1:ENST00000428732.1:chr1:+:147:269	chr1	+	68995058	69003333	68995058	69003333	2	68995058,69003314,	68995162,69003333,
ENSG00000234327.3	ENSG00000234327.3:ENST00000413077.1:chr17:+:31:180	chr17	+	5015257	5015407	5015257	5015407	1	5015257,	5015407,
ENSG00000234327.3	ENSG00000234327.3:ENST00000413077.1:chr17:+:187:216	chr17	+	5016680	5016710	5016680	5016710	1	5016680,	5016710,
ENSG00000234327.3	ENSG00000234327.3:ENST00000413077.1:chr17:+:228:308	chr17	+	5016721	5017507	5016721	5017507	2	5016721,5017452,	5016747,5017507,
ENSG00000234327.3	ENSG00000234327.3:ENST00000413077.1:chr17:+:352:381	chr17	+	5017550	5017580	5017550	5017580	1	5017550,	5017580,
ENSG00000234327.3	ENSG00000234327.3:ENST00000413077.1:chr17:+:403:465	chr17	+	5017601	5017664	5017601	5017664	1	5017601,	5017664,
ENSG00000234456.3	ENSG00000234456.3:ENST00000414797.1:chr7:+:322:339	chr7	+	79084238	79084256	79084238	79084256	1	79084238,	79084256,
ENSG00000234456.3	ENSG00000234456.3:ENST00000414797.1:chr7:+:409:450	chr7	+	79088164	79088206	79088164	79088206	1	79088164,	79088206,
ENSG00000234456.3	ENSG00000234456.3:ENST00000414797.1:chr7:+:475:552	chr7	+	79088230	79088308	79088230	79088308	1	79088230,	79088308,
ENSG00000234456.3	ENSG00000234456.3:ENST00000422093.1:chr7:+:507:662	chr7	+	79088294	79088986	79088294	79088986	2	79088294,79088851,	79088315,79088986,
ENSG00000234494.3	ENSG00000234494.3:ENST00000451140.2:chr17:-:32:166	chr17	-	45995845	46018744	45995845	46018744	2	45995845,46018701,	45995937,46018744,
ENSG00000234546.2	ENSG00000234546.2:ENST00000412639.2:chr1:+:92:340	chr1	+	9242354	9251504	9242354	9251504	3	9242354,9243691,9251451,	9242375,9243866,9251504,
ENSG00000234741.3	ENSG00000234741.3:ENST00000412059.1:chr1:-:737:961	chr1	-	173833055	173833461	173833055	173833461	2	173833055,173833394,	173833213,173833461,
ENSG00000234741.3	ENSG00000234741.3:ENST00000422183.1:chr1:-:313:336	chr1	-	173833626	173833818	173833626	173833818	2	173833626,173833812,	173833644,173833818,
ENSG00000234741.3	ENSG00000234741.3:ENST00000456812.2:chr1:-:305:370	chr1	-	173833390	173833826	173833390	173833826	2	173833390,173833812,	173833442,173833826,
ENSG00000234741.3	ENSG00000234741.3:ENST00000416952.1:chr1:-:444:527	chr1	-	173834576	173834660	173834576	173834660	1	173834576,	173834660,
ENSG00000234741.3	ENSG00000234741.3:ENST00000449289.1:chr1:-:218:280	chr1	-	173833826	173835003	173833826	173835003	3	173833826,173834647,173834994,	173833842,173834685,173835003,
ENSG00000234741.3	ENSG00000234741.3:ENST00000414075.1:chr1:-:59:124	chr1	-	173834401	173835003	173834401	173835003	3	173834401,173834647,173834994,	173834420,173834685,173835003,
ENSG00000234741.3	ENSG00000234741.3:ENST00000412059.1:chr1:-:216:266	chr1	-	173834643	173835003	173834643	173835003	2	173834643,173834994,	173834685,173835003,
ENSG00000234741.3	ENSG00000234741.3:ENST00000421068.1:chr1:-:983:1012	chr1	-	173835002	173835032	173835002	173835032	1	173835002,	173835032,
ENSG00000234741.3	ENSG00000234741.3:ENST00000422008.1:chr1:-:58:141	chr1	-	173835318	173835916	173835318	173835916	3	173835318,173835665,173835898,	173835344,173835705,173835916,
ENSG00000234741.3	ENSG00000234741.3:ENST00000452197.1:chr1:-:26:196	chr1	-	173834376	173836179	173834376	173836179	4	173834376,173835665,173835898,173836128,	173834420,173835705,173835934,173836179,
ENSG00000234741.3	ENSG00000234741.3:ENST00000412059.1:chr1:-:30:182	chr1	-	173835318	173836179	173835318	173836179	4	173835318,173835665,173835898,173836128,	173835344,173835705,173835934,173836179,
ENSG00000234741.3	ENSG00000234741.3:ENST00000416952.1:chr1:-:31:126	chr1	-	173835889	173836179	173835889	173836179	2	173835889,173836128,	173835934,173836179,
ENSG00000235106.4	ENSG00000235106.4:ENST00000430633.1:chr9:+:116:241	chr9	+	136890984	136891110	136890984	136891110	1	136890984,	136891110,
ENSG00000235106.4	ENSG00000235106.4:ENST00000430633.1:chr9:+:238:282	chr9	+	136891106	136891151	136891106	136891151	1	136891106,	136891151,
ENSG00000235106.4	ENSG00000235106.4:ENST00000430633.1:chr9:+:884:1138	chr9	+	136891869	136892124	136891869	136892124	1	136891869,	136892124,
ENSG00000235499.1	ENSG00000235499.1:ENST00000441217.1:chr2:+:32:175	chr2	+	74213112	74213256	74213112	74213256	1	74213112,	74213256,
ENSG00000235560.3	ENSG00000235560.3:ENST00000457283.3:chr16:+:413:523	chr16	+	30546485	30546596	30546485	30546596	1	30546485,	30546596,
ENSG00000235823.1	ENSG00000235823.1:ENST00000454935.1:chr10:+:30:164	chr10	+	102133401	102133536	102133401	102133536	1	102133401,	102133536,
ENSG00000235823.1	ENSG00000235823.1:ENST00000454935.1:chr10:+:104:229	chr10	+	102133475	102133601	102133475	102133601	1	102133475,	102133601,
ENSG00000235823.1	XLOC_008583:TCONS_00018307:chr10:+:349:741	chr10	+	102133703	102142278	102133703	102142278	3	102133703,102140972,102142184,	102133769,102141205,102142278,
ENSG00000235823.1	LINC00263:NR_026762:chr10:+:371:673	chr10	+	102133703	102147797	102133703	102147797	3	102133703,102140972,102147793,	102133769,102141205,102147797,
ENSG00000235823.1	XLOC_008583:TCONS_00018308:chr10:+:103:303	chr10	+	102141008	102147797	102141008	102147797	2	102141008,102147793,	102141205,102147797,
ENSG00000235823.1	ENSG00000235823.1:ENST00000454935.1:chr10:+:893:1225	chr10	+	102141467	102141800	102141467	102141800	1	102141467,	102141800,
ENSG00000235884.2	ENSG00000235884.2:ENST00000415632.1:chr12:+:718:732	chr12	+	30948694	30948709	30948694	30948709	1	30948694,	30948709,
ENSG00000235884.2	ENSG00000235884.2:ENST00000415632.1:chr12:+:755:1129	chr12	+	30948731	30949106	30948731	30949106	1	30948731,	30949106,
ENSG00000235884.2	ENSG00000235884.2:ENST00000550292.1:chr12:+:466:558	chr12	+	30949080	30952869	30949080	30952869	2	30949080,30952846,	30949150,30952869,
ENSG00000235884.2	ENSG00000235884.2:ENST00000547804.1:chr12:+:288:302	chr12	+	30951080	30951095	30951080	30951095	1	30951080,	30951095,
ENSG00000235884.2	ENSG00000235884.2:ENST00000547804.1:chr12:+:381:479	chr12	+	30951173	30952869	30951173	30952869	2	30951173,30952846,	30951249,30952869,
ENSG00000235884.2	ENSG00000235884.2:ENST00000547804.1:chr12:+:528:650	chr12	+	30952917	30954651	30952917	30954651	3	30952917,30953467,30954634,	30952955,30953535,30954651,
ENSG00000235884.2	ENSG00000235884.2:ENST00000547804.1:chr12:+:690:863	chr12	+	30954690	30954864	30954690	30954864	1	30954690,	30954864,
ENSG00000235954.2	ENSG00000235954.2:ENST00000417381.1:chr22:+:313:324	chr22	+	28318012	28318024	28318012	28318024	1	28318012,	28318024,
ENSG00000235954.2	ENSG00000235954.2:ENST00000428818.1:chr22:+:98:178	chr22	+	28320343	28320424	28320343	28320424	1	28320343,	28320424,
ENSG00000236081.1	ENSG00000236081.1:ENST00000453348.1:chr7:-:185:373	chr7	-	1778528	1778717	1778528	1778717	1	1778528,	1778717,
ENSG00000236144.2	ENSG00000236144.2:ENST00000590125.1:chr19:-:143:421	chr19	-	36032471	36033898	36032471	36033898	3	36032471,36032652,36033812,	36032486,36032830,36033898,
ENSG00000236144.2	ENSG00000236144.2:ENST00000588286.1:chr19:-:3:338	chr19	-	36036055	36036391	36036055	36036391	1	36036055,	36036391,
ENSG00000236200.1	ENSG00000236200.1:ENST00000398804.3:chr1:-:86:310	chr1	-	44165716	44170073	44165716	44170073	4	44165716,44168326,44169234,44170023,	44165734,44168399,44169318,44170073,
ENSG00000236200.1	KDM4A-AS1:NR_033827:chr1:-:338:562	chr1	-	44166405	44170073	44166405	44170073	4	44166405,44168326,44169234,44170023,	44166423,44168399,44169318,44170073,
ENSG00000236200.1	ENSG00000236200.1:ENST00000418149.1:chr1:-:80:334	chr1	-	44170065	44172921	44170065	44172921	2	44170065,44172729,	44170128,44172921,
ENSG00000236333.3	ENSG00000236333.3:ENST00000426250.3:chr12:-:1104:1568	chr12	-	72665642	72666709	72665642	72666709	2	72665642,72666544,	72665942,72666709,
ENSG00000236333.3	ENSG00000236333.3:ENST00000426250.3:chr12:-:725:808	chr12	-	72667004	72667088	72667004	72667088	1	72667004,	72667088,
ENSG00000236345.1	ENSG00000236345.1:ENST00000429530.1:chr6:+:366:512	chr6	+	64531447	64531594	64531447	64531594	1	64531447,	64531594,
ENSG00000236358.1	ENSG00000236358.1:ENST00000425104.1:chr1:+:53:229	chr1	+	234492804	234501394	234492804	234501394	2	234492804,234501249,	234492836,234501394,
ENSG00000236618.2	ENSG00000236618.2:ENST00000425081.2:chr17:+:180:185	chr17	+	1421028	1421034	1421028	1421034	1	1421028,	1421034,
ENSG00000236618.2	ENSG00000236618.2:ENST00000425081.2:chr17:+:249:344	chr17	+	1421097	1421193	1421097	1421193	1	1421097,	1421193,
ENSG00000236618.2	ENSG00000236618.2:ENST00000425081.2:chr17:+:256:267	chr17	+	1421104	1421116	1421104	1421116	1	1421104,	1421116,
ENSG00000236618.2	ENSG00000236618.2:ENST00000425081.2:chr17:+:360:443	chr17	+	1421208	1421292	1421208	1421292	1	1421208,	1421292,
ENSG00000236682.1	XLOC_l2_007543:TCONS_l2_00013969:chr2:+:7:174	chr2	+	128145804	128146541	128145804	128146541	2	128145804,128146456,	128145887,128146541,
ENSG00000236682.1	XLOC_l2_007543:TCONS_l2_00013966:chr2:+:1062:1247	chr2	+	128146498	128146796	128146498	128146796	2	128146498,128146686,	128146574,128146796,
ENSG00000236751.1	XLOC_008151:TCONS_00017500:chrX:-:49:216	chrX	-	46185876	46187041	46185876	46187041	3	46185876,46186738,46186985,	46185889,46186837,46187041,
ENSG00000236810.1	ENSG00000236810.1:ENST00000427796.1:chr1:-:170:280	chr1	-	24098623	24098835	24098623	24098835	2	24098623,24098757,	24098656,24098835,
ENSG00000236859.2	ENSG00000236859.2:ENST00000414554.2:chr2:+:188:478	chr2	+	122407413	122408179	122407413	122408179	3	122407413,122407876,122408043,	122407487,122407957,122408179,
ENSG00000236943.2	ENSG00000236943.2:ENST00000430014.1:chr1:-:239:349	chr1	-	144520941	144521052	144520941	144521052	1	144520941,	144521052,
ENSG00000237036.4	ENSG00000237036.4:ENST00000441257.1:chr10:-:74:244	chr10	-	31607356	31607882	31607356	31607882	2	31607356,31607824,	31607469,31607882,
ENSG00000237036.4	ENSG00000237036.4:ENST00000607455.1:chr10:-:109:339	chr10	-	31607505	31607882	31607505	31607882	2	31607505,31607812,	31607666,31607882,
ENSG00000237036.4	ENSG00000237036.4:ENST00000606250.1:chr10:-:43:375	chr10	-	31607567	31607900	31607567	31607900	1	31607567,	31607900,
ENSG00000237187.4	ENSG00000237187.4:ENST00000503134.1:chr5:-:618:638	chr5	-	92899096	92899117	92899096	92899117	1	92899096,	92899117,
ENSG00000237187.4	ENSG00000237187.4:ENST00000504474.1:chr5:-:133:150	chr5	-	92916852	92916870	92916852	92916870	1	92916852,	92916870,
ENSG00000237298.4	ENSG00000237298.4:ENST00000431259.2:chr2:+:150:221	chr2	+	179388043	179388115	179388043	179388115	1	179388043,	179388115,
ENSG00000237298.4	ENSG00000237298.4:ENST00000419746.1:chr2:+:143:148	chr2	+	179388287	179388293	179388287	179388293	1	179388287,	179388293,
ENSG00000237298.4	ENSG00000237298.4:ENST00000442329.2:chr2:+:410:535	chr2	+	179388303	179396106	179388303	179396106	2	179388303,179396040,	179388363,179396106,
ENSG00000237298.4	ENSG00000237298.4:ENST00000419746.1:chr2:+:159:287	chr2	+	179388303	179400527	179388303	179400527	2	179388303,179400458,	179388363,179400527,
ENSG00000237298.4	ENSG00000237298.4:ENST00000431259.2:chr2:+:665:928	chr2	+	179396145	179402337	179396145	179402337	3	179396145,179400458,179402330,	179396305,179400555,179402337,
ENSG00000237298.4	ENSG00000237298.4:ENST00000419746.1:chr2:+:851:1234	chr2	+	179403628	179404012	179403628	179404012	1	179403628,	179404012,
ENSG00000237310.1	XLOC_006133:TCONS_00014154:chr7:+:23:124	chr7	+	65959155	65960299	65959155	65960299	2	65959155,65960241,	65959199,65960299,
ENSG00000237523.1	ENSG00000237523.1:ENST00000422847.1:chr10:+:148:216	chr10	+	81967613	81967682	81967613	81967682	1	81967613,	81967682,
ENSG00000237548.1	ENSG00000237548.1:ENST00000411790.1:chr9:-:326:622	chr9	-	124647343	124647640	124647343	124647640	1	124647343,	124647640,
ENSG00000237548.1	ENSG00000237548.1:ENST00000411790.1:chr9:-:195:311	chr9	-	124647654	124647771	124647654	124647771	1	124647654,	124647771,
ENSG00000237548.1	ENSG00000237548.1:ENST00000411790.1:chr9:-:27:59	chr9	-	124725938	124725971	124725938	124725971	1	124725938,	124725971,
ENSG00000237819.1	ENSG00000237819.1:ENST00000452050.1:chr7:+:82:222	chr7	+	92484229	92546253	92484229	92546253	2	92484229,92546150,	92484267,92546253,
ENSG00000237883.1	ENSG00000237883.1:ENST00000413452.1:chr2:-:238:294	chr2	-	74185266	74185323	74185266	74185323	1	74185266,	74185323,
ENSG00000237943.2	ENSG00000237943.2:ENST00000445427.1:chr10:+:226:345	chr10	+	6622606	6622726	6622606	6622726	1	6622606,	6622726,
ENSG00000237943.2	ENSG00000237943.2:ENST00000455810.1:chr10:+:341:544	chr10	+	6622727	6624141	6622727	6624141	2	6622727,6624099,	6622889,6624141,
ENSG00000237943.2	ENSG00000237943.2:ENST00000445427.1:chr10:+:347:520	chr10	+	6622727	6625649	6622727	6625649	2	6622727,6625637,	6622889,6625649,
ENSG00000238113.2	ENSG00000238113.2:ENST00000424345.1:chr9:+:120:212	chr9	+	66459860	66459953	66459860	66459953	1	66459860,	66459953,
ENSG00000238261.5	ENSG00000238261.5:ENST00000456460.2:chr1:+:36:119	chr1	+	143386152	143392505	143386152	143392505	2	143386152,143392442,	143386173,143392505,
ENSG00000238266.1	ENSG00000238266.1:ENST00000436383.1:chr10:+:76:285	chr10	+	6821635	6821845	6821635	6821845	1	6821635,	6821845,
ENSG00000238266.1	ENSG00000238266.1:ENST00000436383.1:chr10:+:257:325	chr10	+	6821816	6823301	6821816	6823301	2	6821816,6823265,	6821849,6823301,
ENSG00000238266.1	ENSG00000238266.1:ENST00000436383.1:chr10:+:294:344	chr10	+	6823269	6823320	6823269	6823320	1	6823269,	6823320,
ENSG00000238266.1	ENSG00000238266.1:ENST00000436383.1:chr10:+:394:477	chr10	+	6823369	6875609	6823369	6875609	2	6823369,6875604,	6823448,6875609,
ENSG00000238266.1	ENSG00000238266.1:ENST00000436383.1:chr10:+:525:662	chr10	+	6879941	6882461	6879941	6882461	2	6879941,6882352,	6879970,6882461,
ENSG00000238266.1	ENSG00000238266.1:ENST00000436383.1:chr10:+:1001:1021	chr10	+	6882799	6882820	6882799	6882820	1	6882799,	6882820,
ENSG00000239213.1	ENSG00000239213.1:ENST00000461864.1:chr3:-:202:333	chr3	-	136565385	136580677	136565385	136580677	2	136565385,136580588,	136565428,136580677,
ENSG00000239213.1	ENSG00000239213.1:ENST00000461864.1:chr3:-:136:150	chr3	-	136580728	136580743	136580728	136580743	1	136580728,	136580743,
ENSG00000239322.1	ENSG00000239322.1:ENST00000422761.1:chr2:-:382:555	chr2	-	71169529	71175358	71169529	71175358	3	71169529,71174663,71175356,	71169563,71174801,71175358,
ENSG00000239462.1	ENSG00000240476.1:ENST00000473756.1:chr3:+:16:249	chr3	+	98699917	98700151	98699917	98700151	1	98699917,	98700151,
ENSG00000239462.1	ENSG00000240476.1:ENST00000473756.1:chr3:+:240:323	chr3	+	98700141	98700225	98700141	98700225	1	98700141,	98700225,
ENSG00000239462.1	ENSG00000240476.1:ENST00000473756.1:chr3:+:381:545	chr3	+	98701359	98701524	98701359	98701524	1	98701359,	98701524,
ENSG00000239467.1	ENSG00000239467.1:ENST00000426475.1:chr2:+:125:139	chr2	+	171633905	171633920	171633905	171633920	1	171633905,	171633920,
ENSG00000239523.1	ENSG00000239523.1:ENST00000463408.1:chr3:+:246:407	chr3	+	123348347	123348509	123348347	123348509	1	123348347,	123348509,
ENSG00000239911.1	ENSG00000239911.1:ENST00000464464.1:chr7:+:130:282	chr7	+	151575647	151575800	151575647	151575800	1	151575647,	151575800,
ENSG00000240990.5	ENSG00000240990.5:ENST00000520360.1:chr7:+:566:844	chr7	+	27224702	27228342	27224702	27228342	3	27224702,27225727,27228219,	27224703,27225882,27228342,
ENSG00000241316.2	ENSG00000241316.2:ENST00000464420.1:chr3:+:222:284	chr3	+	67705342	67705405	67705342	67705405	1	67705342,	67705405,
ENSG00000241316.2	ENSG00000241316.2:ENST00000464420.1:chr3:+:247:351	chr3	+	67705367	67705472	67705367	67705472	1	67705367,	67705472,
ENSG00000241764.3	ENSG00000241764.3:ENST00000440971.2:chr7:-:269:361	chr7	-	107383695	107383788	107383695	107383788	1	107383695,	107383788,
ENSG00000241764.3	ENSG00000241764.3:ENST00000440971.2:chr7:-:189:248	chr7	-	107383808	107384837	107383808	107384837	2	107383808,107384817,	107383848,107384837,
ENSG00000241990.1	ENSG00000241990.1:ENST00000416202.1:chr22:+:239:310	chr22	+	46452749	46452821	46452749	46452821	1	46452749,	46452821,
ENSG00000241990.1	ENSG00000241990.1:ENST00000416202.1:chr22:+:324:440	chr22	+	46452950	46453067	46452950	46453067	1	46452950,	46453067,
ENSG00000242147.1	ENSG00000242147.1:ENST00000478294.1:chr10:-:134:211	chr10	-	5637438	5637516	5637438	5637516	1	5637438,	5637516,
ENSG00000242282.2	ENSG00000242282.2:ENST00000422961.1:chr2:-:188:208	chr2	-	3581786	3581807	3581786	3581807	1	3581786,	3581807,
ENSG00000243701.1	ENSG00000243701.1:ENST00000463143.1:chr3:+:50:124	chr3	+	106959588	106959663	106959588	106959663	1	106959588,	106959663,
ENSG00000243701.1	ENSG00000243701.1:ENST00000463143.1:chr3:+:106:261	chr3	+	106959644	106959800	106959644	106959800	1	106959644,	106959800,
ENSG00000243926.1	ENSG00000243926.1:ENST00000492937.1:chr3:-:101:298	chr3	-	156389792	156392066	156389792	156392066	2	156389792,156391995,	156389919,156392066,
ENSG00000244300.2	ENSG00000244300.2:ENST00000464242.1:chr3:+:230:277	chr3	+	128208647	128208695	128208647	128208695	1	128208647,	128208695,
ENSG00000244879.3	GABPB1-AS1:NR_024490:chr15:+:949:1182	chr15	+	50647319	50647553	50647319	50647553	1	50647319,	50647553,
ENSG00000244879.3	ENSG00000244879.3:ENST00000560359.1:chr15:+:45:254	chr15	+	50647569	50647779	50647569	50647779	1	50647569,	50647779,
ENSG00000244879.3	ENSG00000244879.3:ENST00000499624.2:chr15:+:26:124	chr15	+	50647689	50648342	50647689	50648342	2	50647689,50648296,	50647742,50648342,
ENSG00000245060.2	ENSG00000245060.2:ENST00000508309.1:chr5:+:66:287	chr5	+	180258092	180261396	180258092	180261396	2	180258092,180261311,	180258229,180261396,
ENSG00000245060.2	ENSG00000245060.2:ENST00000501937.2:chr5:+:425:526	chr5	+	180258789	180261396	180258789	180261396	2	180258789,180261311,	180258806,180261396,
ENSG00000245060.2	ENSG00000245060.2:ENST00000501855.2:chr5:+:566:610	chr5	+	180261421	180261466	180261421	180261466	1	180261421,	180261466,
ENSG00000245060.2	ENSG00000245060.2:ENST00000501855.2:chr5:+:570:644	chr5	+	180261425	180261500	180261425	180261500	1	180261425,	180261500,
ENSG00000245532.4	ENSG00000245532.4:ENST00000499732.1:chr11:+:44:61	chr11	+	65190288	65190306	65190288	65190306	1	65190288,	65190306,
ENSG00000245532.4	ENSG00000245532.4:ENST00000499732.1:chr11:+:52:117	chr11	+	65190296	65190362	65190296	65190362	1	65190296,	65190362,
ENSG00000245532.4	ENSG00000245532.4:ENST00000499732.1:chr11:+:114:329	chr11	+	65190358	65190574	65190358	65190574	1	65190358,	65190574,
ENSG00000245556.2	ENSG00000245556.2:ENST00000513755.1:chr5:-:5:226	chr5	-	77638722	77656212	77638722	77656212	2	77638722,77656037,	77638769,77656212,
ENSG00000245556.2	ENSG00000245556.2:ENST00000421004.3:chr5:-:119:304	chr5	-	77655798	77656212	77655798	77656212	2	77655798,77656037,	77655809,77656212,
ENSG00000245648.1	ENSG00000245648.1:ENST00000500682.1:chr12:+:69:371	chr12	+	10516436	10532305	10516436	10532305	3	10516436,10526633,10532300,	10516632,10526735,10532305,
ENSG00000245648.1	ENSG00000245648.1:ENST00000500682.1:chr12:+:226:348	chr12	+	10516593	10526717	10516593	10526717	2	10516593,10526633,	10516632,10526717,
ENSG00000245648.1	ENSG00000245648.1:ENST00000500682.1:chr12:+:281:400	chr12	+	10526649	10532334	10526649	10532334	2	10526649,10532300,	10526735,10532334,
ENSG00000245910.4	ENSG00000245910.4:ENST00000520348.1:chr8:-:246:356	chr8	-	67834209	67834320	67834209	67834320	1	67834209,	67834320,
ENSG00000245910.4	ENSG00000245910.4:ENST00000520619.1:chr8:-:334:414	chr8	-	67834316	67834606	67834316	67834606	2	67834316,67834558,	67834349,67834606,
ENSG00000245910.4	ENSG00000245910.4:ENST00000521127.1:chr8:-:428:454	chr8	-	67834610	67834637	67834610	67834637	1	67834610,	67834637,
ENSG00000245910.4	ENSG00000245910.4:ENST00000520348.1:chr8:-:153:173	chr8	-	67834891	67834912	67834891	67834912	1	67834891,	67834912,
ENSG00000245910.4	ENSG00000245910.4:ENST00000521399.1:chr8:-:50:121	chr8	-	67834610	67837726	67834610	67837726	2	67834610,67837671,	67834627,67837726,
ENSG00000245910.4	ENSG00000245910.4:ENST00000520348.1:chr8:-:50:127	chr8	-	67834937	67837726	67834937	67837726	2	67834937,67837671,	67834960,67837726,
ENSG00000245937.3	ENSG00000245937.3:ENST00000499346.2:chr5:-:467:652	chr5	-	127276844	127292613	127276844	127292613	2	127276844,127292495,	127276912,127292613,
ENSG00000245937.3	ENSG00000245937.3:ENST00000501652.1:chr5:-:1278:1580	chr5	-	127301599	127301902	127301599	127301902	1	127301599,	127301902,
ENSG00000245937.3	ENSG00000245937.3:ENST00000501652.1:chr5:-:872:1012	chr5	-	127302167	127302308	127302167	127302308	1	127302167,	127302308,
ENSG00000245937.3	ENSG00000245937.3:ENST00000501173.2:chr5:-:571:621	chr5	-	127302567	127302618	127302567	127302618	1	127302567,	127302618,
ENSG00000245937.3	ENSG00000245937.3:ENST00000499346.2:chr5:-:393:572	chr5	-	127292507	127396909	127292507	127396909	2	127292507,127396835,	127292613,127396909,
ENSG00000245937.3	ENSG00000245937.3:ENST00000501173.2:chr5:-:393:596	chr5	-	127302592	127398140	127302592	127398140	3	127302592,127396835,127398065,	127302620,127396936,127398140,
ENSG00000245937.3	ENSG00000245937.3:ENST00000508353.1:chr5:-:283:321	chr5	-	127302592	127412649	127302592	127412649	2	127302592,127412638,	127302620,127412649,
ENSG00000245937.3	ENSG00000245937.3:ENST00000508878.1:chr5:-:475:720	chr5	-	127359965	127412758	127359965	127412758	3	127359965,127396835,127412638,	127359990,127396936,127412758,
ENSG00000245937.3	ENSG00000245937.3:ENST00000508878.1:chr5:-:404:544	chr5	-	127412688	127417708	127412688	127417708	2	127412688,127417664,	127412785,127417708,
ENSG00000245937.3	ENSG00000245937.3:ENST00000499346.2:chr5:-:257:283	chr5	-	127418508	127418535	127418508	127418535	1	127418508,	127418535,
ENSG00000245937.3	ENSG00000245937.3:ENST00000501702.2:chr5:-:52:183	chr5	-	127396857	127418714	127396857	127418714	2	127396857,127418661,	127396936,127418714,
ENSG00000245937.3	ENSG00000245937.3:ENST00000499346.2:chr5:-:78:332	chr5	-	127418459	127418714	127418459	127418714	1	127418459,	127418714,
ENSG00000246067.3	ENSG00000246067.3:ENST00000501011.2:chr11:+:31:78	chr11	+	82783138	82783186	82783138	82783186	1	82783138,	82783186,
ENSG00000246067.3	ENSG00000246067.3:ENST00000533528.1:chr11:+:5:76	chr11	+	82783150	82803117	82783150	82803117	2	82783150,82803074,	82783179,82803117,
ENSG00000246067.3	ENSG00000246067.3:ENST00000501011.2:chr11:+:83:181	chr11	+	82783666	82783765	82783666	82783765	1	82783666,	82783765,
ENSG00000246067.3	ENSG00000246067.3:ENST00000528156.1:chr11:+:282:374	chr11	+	82783666	82784359	82783666	82784359	2	82783666,82784344,	82783744,82784359,
ENSG00000246067.3	ENSG00000246067.3:ENST00000501011.2:chr11:+:208:282	chr11	+	82783791	82784364	82783791	82784364	2	82783791,82784344,	82783846,82784364,
ENSG00000246067.3	ENSG00000246067.3:ENST00000501011.2:chr11:+:324:431	chr11	+	82784405	82784513	82784405	82784513	1	82784405,	82784513,
ENSG00000246067.3	ENSG00000246067.3:ENST00000526795.1:chr11:+:355:474	chr11	+	82784417	82788123	82784417	82788123	2	82784417,82788075,	82784489,82788123,
ENSG00000246089.3	ENSG00000246089.3:ENST00000500118.2:chr8:-:219:572	chr8	-	6263496	6263850	6263496	6263850	1	6263496,	6263850,
ENSG00000246228.2	ENSG00000246228.2:ENST00000501396.1:chr8:-:795:887	chr8	-	128302103	128302196	128302103	128302196	1	128302103,	128302196,
ENSG00000246228.2	ENSG00000246228.2:ENST00000501396.1:chr8:-:710:772	chr8	-	128302218	128302281	128302218	128302281	1	128302218,	128302281,
ENSG00000246263.2	ENSG00000246263.2:ENST00000520820.1:chr8:+:288:446	chr8	+	103251909	103264049	103251909	103264049	3	103251909,103256232,103264026,	103251928,103256349,103264049,
ENSG00000246273.2	ENSG00000246273.2:ENST00000499953.2:chr11:+:158:364	chr11	+	9780000	9802079	9780000	9802079	2	9780000,9801922,	9780050,9802079,
ENSG00000246273.2	ENSG00000246273.2:ENST00000534671.1:chr11:+:205:441	chr11	+	9802092	9829601	9802092	9829601	2	9802092,9829394,	9802122,9829601,
ENSG00000246334.2	PRR7-AS1:NR_038915:chr5:-:27:263	chr5	-	176874681	176874918	176874681	176874918	1	176874681,	176874918,
ENSG00000246582.2	ENSG00000246582.2:ENST00000500853.1:chr8:+:36:101	chr8	+	23082769	23082835	23082769	23082835	1	23082769,	23082835,
ENSG00000246582.2	ENSG00000246582.2:ENST00000500853.1:chr8:+:115:171	chr8	+	23082848	23082905	23082848	23082905	1	23082848,	23082905,
ENSG00000246582.2	ENSG00000246582.2:ENST00000500853.1:chr8:+:156:206	chr8	+	23082889	23082940	23082889	23082940	1	23082889,	23082940,
ENSG00000246582.2	ENSG00000246582.2:ENST00000500853.1:chr8:+:283:495	chr8	+	23083016	23083229	23083016	23083229	1	23083016,	23083229,
ENSG00000246695.3	ENSG00000246695.3:ENST00000500102.2:chr12:-:298:468	chr12	-	26108082	26109238	26108082	26109238	2	26108082,26109159,	26108174,26109238,
ENSG00000246695.3	ENSG00000246695.3:ENST00000546134.1:chr12:-:87:245	chr12	-	26108082	26109638	26108082	26109638	2	26108082,26109571,	26108174,26109638,
ENSG00000246695.3	ENSG00000246695.3:ENST00000500276.2:chr12:-:490:615	chr12	-	26109638	26111021	26109638	26111021	2	26109638,26110951,	26109694,26111021,
ENSG00000246763.2	ENSG00000246763.2:ENST00000505677.1:chr5:-:48:245	chr5	-	98106804	98109125	98106804	98109125	2	98106804,98109011,	98106888,98109125,
ENSG00000246985.3	ENSG00000246985.3:ENST00000499137.2:chr12:-:251:376	chr12	-	93960571	93960697	93960571	93960697	1	93960571,	93960697,
ENSG00000246985.3	ENSG00000246985.3:ENST00000500986.1:chr12:-:14:304	chr12	-	93960739	93965530	93960739	93965530	3	93960739,93960839,93965342,	93960746,93960935,93965530,
ENSG00000247092.2	ENSG00000247092.2:ENST00000554169.1:chr14:-:349:534	chr14	-	96000047	96000233	96000047	96000233	1	96000047,	96000233,
ENSG00000247092.2	ENSG00000247092.2:ENST00000554169.1:chr14:-:303:593	chr14	-	95999357	96000279	95999357	96000279	2	95999357,96000029,	95999398,96000279,
ENSG00000247092.2	ENSG00000247092.2:ENST00000500370.2:chr14:-:197:286	chr14	-	96000850	96000940	96000850	96000940	1	96000850,	96000940,
ENSG00000247092.2	ENSG00000247092.2:ENST00000553559.1:chr14:-:66:320	chr14	-	95999357	96001143	95999357	96001143	2	95999357,96000929,	95999398,96001143,
ENSG00000247095.2	ENSG00000247095.2:ENST00000500447.1:chr11:-:327:590	chr11	-	567033	567297	567033	567297	1	567033,	567297,
ENSG00000247095.2	ENSG00000247095.2:ENST00000533920.1:chr11:-:113:238	chr11	-	567720	567846	567720	567846	1	567720,	567846,
ENSG00000247137.4	ENSG00000247137.4:ENST00000500634.2:chr11:-:29:112	chr11	-	82904591	82904675	82904591	82904675	1	82904591,	82904675,
ENSG00000247240.3	ENSG00000247240.3:ENST00000499217.2:chr15:+:52:141	chr15	+	74753657	74753747	74753657	74753747	1	74753657,	74753747,
ENSG00000247240.3	ENSG00000247240.3:ENST00000499217.2:chr15:+:289:330	chr15	+	74753894	74753936	74753894	74753936	1	74753894,	74753936,
ENSG00000247240.3	ENSG00000247240.3:ENST00000499217.2:chr15:+:593:682	chr15	+	74754198	74754288	74754198	74754288	1	74754198,	74754288,
ENSG00000247271.2	ENSG00000247271.2:ENST00000501079.1:chr11:+:79:168	chr11	+	10879884	10886868	10879884	10886868	2	10879884,10886807,	10879913,10886868,
ENSG00000247516.3	ENSG00000247516.3:ENST00000502001.2:chr5:+:224:286	chr5	+	8457829	8460058	8457829	8460058	2	8457829,8460045,	8457879,8460058,
ENSG00000247516.3	ENSG00000247516.3:ENST00000502001.2:chr5:+:276:317	chr5	+	8460047	8460089	8460047	8460089	1	8460047,	8460089,
ENSG00000247516.3	ENSG00000247516.3:ENST00000502001.2:chr5:+:299:403	chr5	+	8460070	8460175	8460070	8460175	1	8460070,	8460175,
ENSG00000247556.2	ENSG00000247556.2:ENST00000500949.2:chr15:+:14:25	chr15	+	41576216	41576228	41576216	41576228	1	41576216,	41576228,
ENSG00000247556.2	ENSG00000247556.2:ENST00000500949.2:chr15:+:343:402	chr15	+	41590246	41590306	41590246	41590306	1	41590246,	41590306,
ENSG00000247595.2	ENSG00000247595.2:ENST00000501599.2:chr11:+:305:388	chr11	+	18624709	18625369	18624709	18625369	2	18624709,18625318,	18624742,18625369,
ENSG00000247796.2	ENSG00000247796.2:ENST00000499459.2:chr5:+:31:288	chr5	+	52405759	52408108	52405759	52408108	2	52405759,52408069,	52405978,52408108,
ENSG00000247844.1	XLOC_007214:TCONS_00015168:chr8:-:1060:1212	chr8	-	128153726	128156070	128153726	128156070	2	128153726,128156007,	128153816,128156070,
ENSG00000247844.1	XLOC_007215:TCONS_00015169:chr8:-:2608:2697	chr8	-	128181158	128181248	128181158	128181248	1	128181158,	128181248,
ENSG00000247844.1	XLOC_007214:TCONS_00015168:chr8:-:499:561	chr8	-	128197418	128197481	128197418	128197481	1	128197418,	128197481,
ENSG00000247844.1	XLOC_007214:TCONS_00015168:chr8:-:220:465	chr8	-	128197514	128197760	128197514	128197760	1	128197514,	128197760,
ENSG00000247844.1	ENSG00000254166.1:ENST00000521815.1:chr8:-:240:311	chr8	-	128197934	128198006	128197934	128198006	1	128197934,	128198006,
ENSG00000247844.1	ENSG00000247844.1:ENST00000500112.1:chr8:-:635:754	chr8	-	128221486	128221606	128221486	128221606	1	128221486,	128221606,
ENSG00000247844.1	ENSG00000247844.1:ENST00000500112.1:chr8:-:394:603	chr8	-	128221637	128221847	128221637	128221847	1	128221637,	128221847,
ENSG00000247844.1	ENSG00000247844.1:ENST00000500112.1:chr8:-:285:353	chr8	-	128221887	128221956	128221887	128221956	1	128221887,	128221956,
ENSG00000247844.1	ENSG00000247844.1:ENST00000500112.1:chr8:-:179:292	chr8	-	128221948	128231154	128221948	128231154	2	128221948,128231054,	128221962,128231154,
ENSG00000247844.1	ENSG00000247844.1:ENST00000500112.1:chr8:-:61:114	chr8	-	128231218	128231272	128231218	128231272	1	128231218,	128231272,
ENSG00000247844.1	ENSG00000247844.1:ENST00000500112.1:chr8:-:18:74	chr8	-	128231258	128231315	128231258	128231315	1	128231258,	128231315,
ENSG00000248008.2	ENSG00000248008.2:ENST00000500741.2:chr12:-:692:754	chr12	-	120929276	120929339	120929276	120929339	1	120929276,	120929339,
ENSG00000248008.2	ENSG00000248008.2:ENST00000500741.2:chr12:-:265:417	chr12	-	120929613	120929766	120929613	120929766	1	120929613,	120929766,
ENSG00000248008.2	ENSG00000248008.2:ENST00000500741.2:chr12:-:4:159	chr12	-	120929871	120933739	120929871	120933739	2	120929871,120933625,	120929913,120933739,
ENSG00000248161.1	ENSG00000248161.1:ENST00000502883.1:chr4:-:325:456	chr4	-	103339974	103340106	103339974	103340106	1	103339974,	103340106,
ENSG00000248323.1	ENSG00000271762.1:ENST00000607854.1:chr5:-:21:422	chr5	-	90608999	90610198	90608999	90610198	4	90608999,90609454,90609896,90610148,	90609046,90609594,90610061,90610198,
ENSG00000248323.1	ENSG00000248323.1:ENST00000511918.1:chr5:-:2:112	chr5	-	90610087	90610198	90610087	90610198	1	90610087,	90610198,
ENSG00000248508.2	ENSG00000248508.2:ENST00000504245.1:chr15:+:127:186	chr15	+	40331638	40338210	40331638	40338210	2	40331638,40338161,	40331649,40338210,
ENSG00000248508.2	ENSG00000248508.2:ENST00000560341.1:chr15:+:154:342	chr15	+	40338215	40348787	40338215	40348787	2	40338215,40348653,	40338270,40348787,
ENSG00000248538.2	ENSG00000248538.2:ENST00000417333.2:chr8:+:46:204	chr8	+	9046901	9047060	9046901	9047060	1	9046901,	9047060,
ENSG00000248866.1	ENSG00000248866.1:ENST00000503051.1:chr4:+:151:315	chr4	+	53525723	53527103	53525723	53527103	2	53525723,53527058,	53525843,53527103,
ENSG00000248994.1	XLOC_004250:TCONS_00009832:chr5:+:393:542	chr5	+	1931497	1934066	1931497	1934066	2	1931497,1933922,	1931503,1934066,
ENSG00000249042.1	ENSG00000249042.1:ENST00000508000.1:chr5:-:126:200	chr5	-	79781360	79783646	79781360	79783646	2	79781360,79783591,	79781380,79783646,
ENSG00000249042.1	ENSG00000249042.1:ENST00000504300.1:chr5:-:185:217	chr5	-	79783664	79783697	79783664	79783697	1	79783664,	79783697,
ENSG00000249116.1	ENSG00000249116.1:ENST00000506335.1:chr5:+:224:343	chr5	+	1884303	1884682	1884303	1884682	2	1884303,1884593,	1884334,1884682,
ENSG00000249348.1	ENSG00000249348.1:ENST00000504032.1:chr4:+:112:399	chr4	+	39529750	39533668	39529750	39533668	2	39529750,39533588,	39529958,39533668,
ENSG00000249500.1	ENSG00000249500.1:ENST00000507838.1:chr4:+:493:615	chr4	+	166675991	166676114	166675991	166676114	1	166675991,	166676114,
ENSG00000249641.2	ENSG00000249641.2:ENST00000512916.2:chr12:-:215:349	chr12	-	54330964	54331099	54330964	54331099	1	54330964,	54331099,
ENSG00000249641.2	ENSG00000249641.2:ENST00000512916.2:chr12:-:111:125	chr12	-	54333301	54333316	54333301	54333316	1	54333301,	54333316,
ENSG00000249673.2	ENSG00000249673.2:ENST00000505731.1:chr4:+:39:110	chr4	+	2936664	2936736	2936664	2936736	1	2936664,	2936736,
ENSG00000249673.2	ENSG00000249673.2:ENST00000505731.1:chr4:+:177:308	chr4	+	2936802	2936934	2936802	2936934	1	2936802,	2936934,
ENSG00000249673.2	ENSG00000249673.2:ENST00000505731.1:chr4:+:616:819	chr4	+	2937241	2937445	2937241	2937445	1	2937241,	2937445,
ENSG00000249859.3	ENSG00000249859.3:ENST00000504719.2:chr8:+:32:286	chr8	+	128806810	128867485	128806810	128867485	2	128806810,128867400,	128806980,128867485,
ENSG00000249859.3	ENSG00000249859.3:ENST00000521951.1:chr8:+:8:457	chr8	+	128806810	128903114	128806810	128903114	2	128806810,128902834,	128806980,128903114,
ENSG00000249859.3	ENSG00000249859.3:ENST00000504719.2:chr8:+:102:170	chr8	+	128806880	128806949	128806880	128806949	1	128806880,	128806949,
ENSG00000249859.3	ENSG00000249859.3:ENST00000523427.1:chr8:+:110:202	chr8	+	128806930	128864222	128806930	128864222	2	128806930,128864179,	128806980,128864222,
ENSG00000249859.3	ENSG00000249859.3:ENST00000517790.1:chr8:+:195:260	chr8	+	128808194	128902840	128808194	128902840	2	128808194,128902834,	128808254,128902840,
ENSG00000249859.3	ENSG00000249859.3:ENST00000518528.1:chr8:+:171:212	chr8	+	128808236	128808278	128808236	128808278	1	128808236,	128808278,
ENSG00000249859.3	ENSG00000249859.3:ENST00000504719.2:chr8:+:412:459	chr8	+	128902879	128902927	128902879	128902927	1	128902879,	128902927,
ENSG00000250303.2	XLOC_l2_002469:TCONS_l2_00004767:chr11:+:146:409	chr11	+	112161146	112162268	112161146	112162268	2	112161146,112162042,	112161184,112162268,
ENSG00000250742.1	ENSG00000250742.1:ENST00000508564.1:chr12:+:68:82	chr12	+	54519949	54519964	54519949	54519964	1	54519949,	54519964,
ENSG00000250742.1	ENSG00000250742.1:ENST00000508564.1:chr12:+:109:495	chr12	+	54519990	54520377	54519990	54520377	1	54519990,	54520377,
ENSG00000250786.1	ENSG00000250786.1:ENST00000508179.1:chr5:+:298:432	chr5	+	9546609	9549203	9546609	9549203	2	9546609,9549101,	9546642,9549203,
ENSG00000250786.1	ENSG00000250786.1:ENST00000509788.1:chr5:+:352:423	chr5	+	9549212	9549284	9549212	9549284	1	9549212,	9549284,
ENSG00000250786.1	ENSG00000250786.1:ENST00000508179.1:chr5:+:442:498	chr5	+	9549212	9549421	9549212	9549421	2	9549212,9549413,	9549261,9549421,
ENSG00000250786.1	ENSG00000250786.1:ENST00000508179.1:chr5:+:930:1199	chr5	+	9549852	9550122	9549852	9550122	1	9549852,	9550122,
ENSG00000250988.3	ENSG00000250988.3:ENST00000544685.2:chr15:+:41:49	chr15	+	83419356	83419365	83419356	83419365	1	83419356,	83419365,
ENSG00000250988.3	ENSG00000250988.3:ENST00000544685.2:chr15:+:127:270	chr15	+	83419442	83419586	83419442	83419586	1	83419442,	83419586,
ENSG00000250988.3	ENSG00000250988.3:ENST00000558687.1:chr15:+:125:244	chr15	+	83419442	83423476	83419442	83423476	2	83419442,83423380,	83419466,83423476,
ENSG00000250999.1	ENSG00000250999.1:ENST00000514793.1:chr5:+:136:336	chr5	+	179085372	179090066	179085372	179090066	2	179085372,179089975,	179085482,179090066,
ENSG00000251003.3	ENSG00000251003.3:ENST00000520594.1:chr8:-:25:321	chr8	-	106799774	107072670	106799774	107072670	4	106799774,106810552,106939878,107072608,	106799824,106810670,106939945,107072670,
ENSG00000251003.3	ENSG00000251003.3:ENST00000509144.2:chr8:-:1:279	chr8	-	106809429	107072670	106809429	107072670	4	106809429,106810552,106939869,107072608,	106809452,106810670,106939945,107072670,
ENSG00000251003.3	ENSG00000251003.3:ENST00000520433.1:chr8:-:53:58	chr8	-	107072693	107072699	107072693	107072699	1	107072693,	107072699,
ENSG00000251022.2	ENSG00000251022.2:ENST00000504520.2:chr4:-:1158:1412	chr4	-	83815518	83815773	83815518	83815773	1	83815518,	83815773,
ENSG00000251022.2	ENSG00000251022.2:ENST00000504718.1:chr4:-:67:249	chr4	-	83821257	83821588	83821257	83821588	2	83821257,83821524,	83821376,83821588,
ENSG00000251022.2	ENSG00000251022.2:ENST00000503704.1:chr4:-:134:292	chr4	-	83821319	83821588	83821319	83821588	2	83821319,83821486,	83821376,83821588,
ENSG00000251022.2	ENSG00000251022.2:ENST00000504869.1:chr4:-:131:361	chr4	-	83821357	83821588	83821357	83821588	1	83821357,	83821588,
ENSG00000251095.2	ENSG00000251095.2:ENST00000513572.1:chr4:+:61:117	chr4	+	90602723	90602780	90602723	90602780	1	90602723,	90602780,
ENSG00000251095.2	ENSG00000251095.2:ENST00000513572.1:chr4:+:248:397	chr4	+	90612510	90613669	90612510	90613669	2	90612510,90613565,	90612556,90613669,
ENSG00000251095.2	ENSG00000251095.2:ENST00000507916.2:chr4:+:209:388	chr4	+	90612510	90641110	90612510	90641110	2	90612510,90640976,	90612556,90641110,
ENSG00000251562.3	ENSG00000251562.3:ENST00000534336.1:chr11:+:1365:1382	chr11	+	65266597	65266615	65266597	65266615	1	65266597,	65266615,
ENSG00000251562.3	ENSG00000251562.3:ENST00000534336.1:chr11:+:1424:1450	chr11	+	65266656	65266683	65266656	65266683	1	65266656,	65266683,
ENSG00000251562.3	ENSG00000251562.3:ENST00000534336.1:chr11:+:1481:1492	chr11	+	65266713	65266725	65266713	65266725	1	65266713,	65266725,
ENSG00000251562.3	ENSG00000251562.3:ENST00000534336.1:chr11:+:1535:1654	chr11	+	65266767	65266887	65266767	65266887	1	65266767,	65266887,
ENSG00000251562.3	ENSG00000251562.3:ENST00000534336.1:chr11:+:1774:1812	chr11	+	65267006	65267045	65267006	65267045	1	65267006,	65267045,
ENSG00000251562.3	ENSG00000251562.3:ENST00000534336.1:chr11:+:2720:2755	chr11	+	65267952	65267988	65267952	65267988	1	65267952,	65267988,
ENSG00000251562.3	ENSG00000251562.3:ENST00000534336.1:chr11:+:2963:3106	chr11	+	65268195	65268339	65268195	65268339	1	65268195,	65268339,
ENSG00000251580.1	ENSG00000251580.1:ENST00000513179.1:chr4:-:119:328	chr4	-	6672531	6675431	6672531	6675431	2	6672531,6675410,	6672720,6675431,
ENSG00000253161.1	ENSG00000253161.1:ENST00000520422.1:chr8:-:248:382	chr8	-	37350969	37351104	37350969	37351104	1	37350969,	37351104,
ENSG00000253187.2	ENSG00000253187.2:ENST00000523790.1:chr7:+:132:392	chr7	+	27208844	27209105	27208844	27209105	1	27208844,	27209105,
ENSG00000253187.2	ENSG00000253187.2:ENST00000519935.1:chr7:+:587:874	chr7	+	27210960	27211248	27210960	27211248	1	27210960,	27211248,
ENSG00000253352.4	TUG1:NR_002323:chr22:+:143:295	chr22	+	31365776	31365929	31365776	31365929	1	31365776,	31365929,
ENSG00000253352.4	TUG1:NR_002323:chr22:+:159:170	chr22	+	31365792	31365804	31365792	31365804	1	31365792,	31365804,
ENSG00000253352.4	ENSG00000253352.4:ENST00000519077.3:chr22:+:271:582	chr22	+	31367322	31367634	31367322	31367634	1	31367322,	31367634,
ENSG00000253352.4	ENSG00000253352.4:ENST00000563812.1:chr22:+:17:145	chr22	+	31367482	31368855	31367482	31368855	2	31367482,31368840,	31367596,31368855,
ENSG00000253352.4	ENSG00000253352.4:ENST00000566220.1:chr22:+:729:845	chr22	+	31367762	31369023	31367762	31369023	2	31367762,31368909,	31367765,31369023,
ENSG00000253352.4	XLOC_014209:TCONS_00029580:chr22:+:30:149	chr22	+	31368060	31368862	31368060	31368862	2	31368060,31368840,	31368158,31368862,
ENSG00000253408.1	ENSG00000253408.1:ENST00000521802.1:chr8:-:3:383	chr8	-	42112876	42123213	42112876	42123213	3	42112876,42120846,42123132,	42113032,42120990,42123213,
ENSG00000253716.1	ENSG00000253716.1:ENST00000518073.1:chr8:-:315:362	chr8	-	144363013	144363061	144363013	144363061	1	144363013,	144363061,
ENSG00000253716.1	ENSG00000253716.1:ENST00000517411.1:chr8:-:185:205	chr8	-	144363140	144363161	144363140	144363161	1	144363140,	144363161,
ENSG00000253738.1	ENSG00000253738.1:ENST00000524003.1:chr8:-:898:1107	chr8	-	92081201	92081411	92081201	92081411	1	92081201,	92081411,
ENSG00000253738.1	ENSG00000253738.1:ENST00000524003.1:chr8:-:715:870	chr8	-	92081438	92081594	92081438	92081594	1	92081438,	92081594,
ENSG00000253738.1	ENSG00000253738.1:ENST00000524003.1:chr8:-:607:627	chr8	-	92081681	92081702	92081681	92081702	1	92081681,	92081702,
ENSG00000253738.1	ENSG00000253738.1:ENST00000522817.1:chr8:-:335:448	chr8	-	92075962	92081908	92075962	92081908	2	92075962,92081806,	92075974,92081908,
ENSG00000253738.1	ENSG00000253738.1:ENST00000524003.1:chr8:-:401:559	chr8	-	92081749	92081908	92081749	92081908	1	92081749,	92081908,
ENSG00000253738.1	ENSG00000253738.1:ENST00000522817.1:chr8:-:244:297	chr8	-	92081945	92081999	92081945	92081999	1	92081945,	92081999,
ENSG00000253738.1	ENSG00000253738.1:ENST00000522817.1:chr8:-:166:231	chr8	-	92082011	92082185	92082011	92082185	2	92082011,92082158,	92082050,92082185,
ENSG00000253738.1	ENSG00000253738.1:ENST00000522817.1:chr8:-:88:96	chr8	-	92082254	92082263	92082254	92082263	1	92082254,	92082263,
ENSG00000253982.1	ENSG00000253982.1:ENST00000517959.1:chr8:-:139:207	chr8	-	1710955	1711024	1710955	1711024	1	1710955,	1711024,
ENSG00000253982.1	ENSG00000253982.1:ENST00000518481.1:chr8:-:3:116	chr8	-	1711346	1711460	1711346	1711460	1	1711346,	1711460,
ENSG00000254315.1	ENSG00000254315.1:ENST00000521010.1:chr8:+:26:55	chr8	+	95545881	95546184	95545881	95546184	2	95545881,95546165,	95545892,95546184,
ENSG00000254473.1	ENSG00000254473.1:ENST00000531661.1:chr9:+:139:633	chr9	+	86327415	86327910	86327415	86327910	1	86327415,	86327910,
ENSG00000254635.1	ENSG00000254635.1:ENST00000527986.1:chr10:-:784:1101	chr10	-	28812801	28813119	28812801	28813119	1	28812801,	28813119,
ENSG00000254635.1	ENSG00000254635.1:ENST00000527986.1:chr10:-:521:565	chr10	-	28813337	28813382	28813337	28813382	1	28813337,	28813382,
ENSG00000254635.1	ENSG00000254635.1:ENST00000527986.1:chr10:-:514:591	chr10	-	28813311	28813389	28813311	28813389	1	28813311,	28813389,
ENSG00000254635.1	ENSG00000254635.1:ENST00000527986.1:chr10:-:432:542	chr10	-	28813360	28813471	28813360	28813471	1	28813360,	28813471,
ENSG00000254635.1	ENSG00000254635.1:ENST00000527986.1:chr10:-:329:370	chr10	-	28813532	28814910	28813532	28814910	2	28813532,28814876,	28813540,28814910,
ENSG00000254682.1	ENSG00000254682.1:ENST00000529369.1:chr11:+:73:168	chr11	+	71159792	71159888	71159792	71159888	1	71159792,	71159888,
ENSG00000254703.2	ENSG00000254703.2:ENST00000526269.2:chr11:-:893:1078	chr11	-	128561785	128561971	128561785	128561971	1	128561785,	128561971,
ENSG00000254842.2	ENSG00000254842.2:ENST00000533434.1:chr11:-:237:356	chr11	-	130714871	130716081	130714871	130716081	2	130714871,130716021,	130714931,130716081,
ENSG00000254842.2	ENSG00000254842.2:ENST00000533434.1:chr11:-:60:146	chr11	-	130716842	130716929	130716842	130716929	1	130716842,	130716929,
ENSG00000255121.2	ENSG00000255121.2:ENST00000526453.1:chr11:-:27:101	chr11	-	118868612	118868687	118868612	118868687	1	118868612,	118868687,
ENSG00000255135.3	ENSG00000255135.3:ENST00000530759.1:chr11:-:223:282	chr11	-	76155335	76155395	76155335	76155395	1	76155335,	76155395,
ENSG00000255399.2	ENSG00000255399.2:ENST00000528549.1:chr12:+:263:502	chr12	+	114847279	114847519	114847279	114847519	1	114847279,	114847519,
ENSG00000255414.1	ENSG00000255414.1:ENST00000525757.1:chr11:+:322:342	chr11	+	123325427	123325448	123325427	123325448	1	123325427,	123325448,
ENSG00000255414.1	ENSG00000255414.1:ENST00000525757.1:chr11:+:355:411	chr11	+	123325460	123325517	123325460	123325517	1	123325460,	123325517,
ENSG00000255414.1	XLOC_l2_002502:TCONS_l2_00004816:chr11:+:349:372	chr11	+	123351555	123351579	123351555	123351579	1	123351555,	123351579,
ENSG00000255717.2	ENSG00000255717.2:ENST00000535076.1:chr11:-:563:631	chr11	-	62619736	62619805	62619736	62619805	1	62619736,	62619805,
ENSG00000255717.2	ENSG00000255717.2:ENST00000537068.1:chr11:-:325:351	chr11	-	62619736	62620558	62619736	62620558	2	62619736,62620542,	62619747,62620558,
ENSG00000255717.2	ENSG00000255717.2:ENST00000538266.1:chr11:-:262:303	chr11	-	62620123	62620558	62620123	62620558	2	62620123,62620546,	62620153,62620558,
ENSG00000255717.2	ENSG00000255717.2:ENST00000545688.1:chr11:-:319:450	chr11	-	62620379	62621028	62620379	62621028	3	62620379,62620546,62621023,	62620465,62620587,62621028,
ENSG00000255717.2	ENSG00000255717.2:ENST00000545920.1:chr11:-:257:304	chr11	-	62621509	62621557	62621509	62621557	1	62621509,	62621557,
ENSG00000255717.2	ENSG00000255717.2:ENST00000537965.1:chr11:-:403:471	chr11	-	62621945	62622014	62621945	62622014	1	62621945,	62622014,
ENSG00000255717.2	ENSG00000255717.2:ENST00000538266.1:chr11:-:44:241	chr11	-	62620578	62622688	62620578	62622688	5	62620578,62621023,62621272,62621990,62622604,	62620587,62621062,62621305,62622023,62622688,
ENSG00000255717.2	ENSG00000255717.2:ENST00000537068.1:chr11:-:60:203	chr11	-	62621509	62622688	62621509	62622688	3	62621509,62621990,62622604,	62621536,62622023,62622688,
ENSG00000255717.2	ENSG00000255717.2:ENST00000538654.1:chr11:-:409:465	chr11	-	62622891	62622948	62622891	62622948	1	62622891,	62622948,
ENSG00000255717.2	ENSG00000255717.2:ENST00000540725.1:chr11:-:254:451	chr11	-	62622365	62622964	62622365	62622964	3	62622365,62622604,62622895,	62622410,62622688,62622964,
ENSG00000255717.2	ENSG00000255717.2:ENST00000544983.1:chr11:-:266:490	chr11	-	62622532	62622964	62622532	62622964	2	62622532,62622895,	62622688,62622964,
ENSG00000255717.2	ENSG00000255717.2:ENST00000537925.1:chr11:-:104:121	chr11	-	62623217	62623235	62623217	62623235	1	62623217,	62623235,
ENSG00000255857.1	ENSG00000255857.1:ENST00000542265.1:chr12:+:46:132	chr12	+	120639139	120639226	120639139	120639226	1	120639139,	120639226,
ENSG00000255857.1	ENSG00000255857.1:ENST00000535200.1:chr12:+:85:90	chr12	+	120644376	120644382	120644376	120644382	1	120644376,	120644382,
ENSG00000255857.1	ENSG00000255857.1:ENST00000535200.1:chr12:+:111:212	chr12	+	120644402	120647721	120644402	120647721	2	120644402,120647641,	120644424,120647721,
ENSG00000255857.1	ENSG00000255857.1:ENST00000538804.1:chr12:+:214:318	chr12	+	120644490	120647721	120644490	120647721	2	120644490,120647641,	120644515,120647721,
ENSG00000255857.1	ENSG00000255857.1:ENST00000535200.1:chr12:+:472:543	chr12	+	120650243	120650315	120650243	120650315	1	120650243,	120650315,
ENSG00000256268.1	ENSG00000256268.1:ENST00000539116.1:chr12:+:16:30	chr12	+	65996664	65996679	65996664	65996679	1	65996664,	65996679,
ENSG00000256268.1	ENSG00000256268.1:ENST00000539116.1:chr12:+:93:296	chr12	+	65996741	65999991	65996741	65999991	2	65996741,65999807,	65996761,65999991,
ENSG00000256268.1	XLOC_009788:TCONS_00020456:chr12:+:321:761	chr12	+	65999966	66006869	65999966	66006869	2	65999966,66006471,	66000009,66006869,
ENSG00000256288.1	ENSG00000256288.1:ENST00000539009.1:chr12:-:96:176	chr12	-	10490714	10490795	10490714	10490795	1	10490714,	10490795,
ENSG00000256628.2	ENSG00000256628.2:ENST00000536865.1:chr3:+:215:481	chr3	+	101395488	101395755	101395488	101395755	1	101395488,	101395755,
ENSG00000256802.2	ENSG00000256802.2:ENST00000536835.2:chr15:+:190:564	chr15	+	29967383	29969407	29967383	29969407	2	29967383,29969379,	29967730,29969407,
ENSG00000256802.2	XLOC_l2_004598:TCONS_l2_00008514:chr15:+:160:507	chr15	+	29967383	29972956	29967383	29972956	2	29967383,29972955,	29967730,29972956,
ENSG00000256802.2	ENSG00000256802.2:ENST00000536835.2:chr15:+:212:457	chr15	+	29967405	29967651	29967405	29967651	1	29967405,	29967651,
ENSG00000256940.1	ENSG00000256940.1:ENST00000544553.1:chr11:+:30:107	chr11	+	64013465	64013543	64013465	64013543	1	64013465,	64013543,
ENSG00000256940.1	ENSG00000256940.1:ENST00000538355.1:chr11:+:167:316	chr11	+	64014692	64015535	64014692	64015535	2	64014692,64015424,	64014731,64015535,
ENSG00000257084.1	ENSG00000257084.1:ENST00000537269.1:chr12:+:128:142	chr12	+	7073388	7073403	7073388	7073403	1	7073388,	7073403,
ENSG00000257084.1	ENSG00000257084.1:ENST00000537269.1:chr12:+:204:302	chr12	+	7073464	7073563	7073464	7073563	1	7073464,	7073563,
ENSG00000257167.2	ENSG00000257167.2:ENST00000548760.2:chr12:-:1018:1116	chr12	-	98908990	98909089	98908990	98909089	1	98908990,	98909089,
ENSG00000257167.2	ENSG00000257167.2:ENST00000548760.2:chr12:-:733:948	chr12	-	98909158	98909374	98909158	98909374	1	98909158,	98909374,
ENSG00000257167.2	ENSG00000257167.2:ENST00000546421.1:chr12:-:333:587	chr12	-	98909307	98909562	98909307	98909562	1	98909307,	98909562,
ENSG00000257219.1	ENSG00000257219.1:ENST00000550380.1:chr12:+:145:165	chr12	+	76685897	76685918	76685897	76685918	1	76685897,	76685918,
ENSG00000257219.1	XLOC_009810:TCONS_00020477:chr12:+:175:327	chr12	+	76685901	76686054	76685901	76686054	1	76685901,	76686054,
ENSG00000257219.1	ENSG00000257219.1:ENST00000550380.1:chr12:+:312:422	chr12	+	76687606	76687717	76687606	76687717	1	76687606,	76687717,
ENSG00000257241.1	ENSG00000257815.1:ENST00000550216.1:chr12:-:174:278	chr12	-	70619165	70636848	70619165	70636848	3	70619165,70636576,70636845,	70619170,70636673,70636848,
ENSG00000257241.1	ENSG00000257815.1:ENST00000553135.1:chr12:-:26:205	chr12	-	70636514	70637112	70636514	70637112	2	70636514,70637091,	70636673,70637112,
ENSG00000257303.1	ENSG00000257303.1:ENST00000549860.1:chr12:+:152:244	chr12	+	56694647	56708400	56694647	56708400	2	56694647,56708312,	56694652,56708400,
ENSG00000257303.1	ENSG00000257303.1:ENST00000549565.1:chr12:+:61:156	chr12	+	56706205	56708330	56706205	56708330	2	56706205,56708312,	56706283,56708330,
ENSG00000257605.1	ENSG00000257605.1:ENST00000550263.1:chr12:-:33:329	chr12	-	53692755	53694065	53692755	53694065	2	53692755,53693926,	53692913,53694065,
ENSG00000257605.1	ENSG00000257605.1:ENST00000550263.1:chr12:-:10:60	chr12	-	53694037	53694088	53694037	53694088	1	53694037,	53694088,
ENSG00000257621.3	ENSG00000257621.3:ENST00000554360.1:chr14:-:1049:1174	chr14	-	58733382	58733508	58733382	58733508	1	58733382,	58733508,
ENSG00000257621.3	ENSG00000257621.3:ENST00000554360.1:chr14:-:636:731	chr14	-	58733825	58733921	58733825	58733921	1	58733825,	58733921,
ENSG00000257621.3	ENSG00000257621.3:ENST00000555275.1:chr14:-:247:393	chr14	-	58740700	58740847	58740700	58740847	1	58740700,	58740847,
ENSG00000257621.3	ENSG00000257621.3:ENST00000556002.1:chr14:-:163:258	chr14	-	58734105	58758410	58734105	58758410	3	58734105,58740696,58758352,	58734111,58740728,58758410,
ENSG00000257621.3	ENSG00000257621.3:ENST00000556400.1:chr14:-:176:289	chr14	-	58740672	58758410	58740672	58758410	2	58740672,58758352,	58740728,58758410,
ENSG00000257621.3	ENSG00000257621.3:ENST00000554360.1:chr14:-:190:441	chr14	-	58740700	58758410	58740700	58758410	3	58740700,58752308,58758352,	58740728,58752474,58758410,
ENSG00000257621.3	ENSG00000257621.3:ENST00000553657.1:chr14:-:218:289	chr14	-	58740839	58758410	58740839	58758410	2	58740839,58758352,	58740853,58758410,
ENSG00000257621.3	ENSG00000257621.3:ENST00000555037.1:chr14:-:267:395	chr14	-	58755460	58758410	58755460	58758410	2	58755460,58758352,	58755531,58758410,
ENSG00000257621.3	ENSG00000257621.3:ENST00000554360.1:chr14:-:50:202	chr14	-	58758397	58764797	58758397	58764797	2	58758397,58764672,	58758425,58764797,
ENSG00000257621.3	ENSG00000257621.3:ENST00000553657.1:chr14:-:5:133	chr14	-	58759852	58764797	58759852	58764797	2	58759852,58764672,	58759856,58764797,
ENSG00000257621.3	ENSG00000257621.3:ENST00000554309.1:chr14:-:47:241	chr14	-	58760574	58764797	58760574	58764797	2	58760574,58764672,	58760644,58764797,
ENSG00000257621.3	ENSG00000257621.3:ENST00000557660.1:chr14:-:41:187	chr14	-	58762507	58764797	58762507	58764797	2	58762507,58764672,	58762529,58764797,
ENSG00000257698.1	ENSG00000257698.1:ENST00000546580.1:chr12:-:354:548	chr12	-	58325392	58329319	58325392	58329319	2	58325392,58329252,	58325520,58329319,
ENSG00000257698.1	ENSG00000257698.1:ENST00000551421.1:chr12:-:177:368	chr12	-	58325392	58329685	58325392	58329685	2	58325392,58329621,	58325520,58329685,
ENSG00000257698.1	ENSG00000257698.1:ENST00000546580.1:chr12:-:273:344	chr12	-	58329328	58329685	58329328	58329685	2	58329328,58329621,	58329336,58329685,
ENSG00000257698.1	ENSG00000257698.1:ENST00000546580.1:chr12:-:194:271	chr12	-	58329686	58329764	58329686	58329764	1	58329686,	58329764,
ENSG00000257698.1	ENSG00000257698.1:ENST00000546580.1:chr12:-:135:143	chr12	-	58329814	58329823	58329814	58329823	1	58329814,	58329823,
ENSG00000258056.1	ENSG00000258056.1:ENST00000552576.1:chr12:+:805:1029	chr12	+	56123998	56124223	56123998	56124223	1	56123998,	56124223,
ENSG00000258602.1	ENSG00000258602.1:ENST00000553613.1:chr14:+:35:58	chr14	+	77426015	77426039	77426015	77426039	1	77426015,	77426039,
ENSG00000258704.1	ENSG00000258704.1:ENST00000554945.1:chr14:-:244:384	chr14	-	35438463	35441238	35438463	35441238	2	35438463,35441147,	35438513,35441238,
ENSG00000258704.1	ENSG00000258704.1:ENST00000554945.1:chr14:-:14:67	chr14	-	35441414	35451684	35441414	35451684	2	35441414,35451635,	35441419,35451684,
ENSG00000258704.1	ENSG00000258704.1:ENST00000555015.1:chr14:-:16:141	chr14	-	35438463	35451705	35438463	35451705	2	35438463,35451629,	35438513,35451705,
ENSG00000258791.3	LINC00520:NR_026796:chr14:-:1735:1992	chr14	-	56247928	56248186	56247928	56248186	1	56247928,	56248186,
ENSG00000258791.3	ENSG00000258791.3:ENST00000560336.2:chr14:-:550:648	chr14	-	56249018	56249117	56249018	56249117	1	56249018,	56249117,
ENSG00000258791.3	ENSG00000258791.3:ENST00000554221.1:chr14:-:125:238	chr14	-	56249235	56260135	56249235	56260135	2	56249235,56260085,	56249299,56260135,
ENSG00000258791.3	ENSG00000258791.3:ENST00000554221.1:chr14:-:76:156	chr14	-	56260103	56263330	56260103	56263330	2	56260103,56263320,	56260174,56263330,
ENSG00000258791.3	ENSG00000258791.3:ENST00000554221.1:chr14:-:15:20	chr14	-	56263385	56263391	56263385	56263391	1	56263385,	56263391,
ENSG00000258976.1	ENSG00000258976.1:ENST00000556652.1:chr14:-:338:574	chr14	-	75081487	75081724	75081487	75081724	1	75081487,	75081724,
ENSG00000259146.2	ENSG00000259146.2:ENST00000554634.1:chr14:-:127:384	chr14	-	71773965	71777949	71773965	71777949	3	71773965,71777274,71777928,	71774080,71777396,71777949,
ENSG00000259146.2	ENSG00000259146.2:ENST00000555771.1:chr14:-:56:178	chr14	-	71762135	71788475	71762135	71788475	2	71762135,71788390,	71762173,71788475,
ENSG00000259153.1	ENSG00000259153.1:ENST00000554032.1:chr14:+:9:149	chr14	+	71276930	71281890	71276930	71281890	2	71276930,71281827,	71277008,71281890,
ENSG00000259153.1	ENSG00000259153.1:ENST00000554032.1:chr14:+:131:259	chr14	+	71281871	71282000	71281871	71282000	1	71281871,	71282000,
ENSG00000259230.1	ENSG00000259230.1:ENST00000559946.1:chr14:+:498:728	chr14	+	103021058	103021289	103021058	103021289	1	103021058,	103021289,
ENSG00000259330.1	XLOC_l2_004631:TCONS_l2_00008581:chr15:+:24:89	chr15	+	40616060	40616126	40616060	40616126	1	40616060,	40616126,
ENSG00000259330.1	XLOC_l2_004631:TCONS_l2_00008581:chr15:+:220:681	chr15	+	40616256	40616718	40616256	40616718	1	40616256,	40616718,
ENSG00000259426.1	ENSG00000259426.1:ENST00000558617.1:chr15:-:316:651	chr15	-	69706716	69707052	69706716	69707052	1	69706716,	69707052,
ENSG00000259673.1	IQCH-AS1:NR_040054:chr15:-:698:757	chr15	-	67807294	67807354	67807294	67807354	1	67807294,	67807354,
ENSG00000259673.1	IQCH-AS1:NR_040054:chr15:-:333:419	chr15	-	67811371	67813849	67811371	67813849	2	67811371,67813831,	67811440,67813849,
ENSG00000259802.1	ENSG00000259802.1:ENST00000561606.1:chr5:-:137:271	chr5	-	10353441	10353576	10353441	10353576	1	10353441,	10353576,
ENSG00000259943.1	ENSG00000259943.1:ENST00000567508.1:chr1:-:355:402	chr1	-	40723236	40723284	40723236	40723284	1	40723236,	40723284,
ENSG00000259943.1	ENSG00000259943.1:ENST00000567508.1:chr1:-:348:437	chr1	-	40723201	40723291	40723201	40723291	1	40723201,	40723291,
ENSG00000260018.1	ENSG00000260018.1:ENST00000565382.1:chr16:+:98:295	chr16	+	84150753	84150951	84150753	84150951	1	84150753,	84150951,
ENSG00000260083.1	ENSG00000260083.1:ENST00000564901.1:chr16:+:98:232	chr16	+	30887422	30905986	30887422	30905986	2	30887422,30905868,	30887439,30905986,
ENSG00000260083.1	ENSG00000260083.1:ENST00000565573.1:chr16:+:426:569	chr16	+	30900253	30905986	30900253	30905986	2	30900253,30905868,	30900279,30905986,
ENSG00000260136.1	ENSG00000260136.1:ENST00000570080.1:chr16:+:94:336	chr16	+	23464172	23464415	23464172	23464415	1	23464172,	23464415,
ENSG00000260231.1	ENSG00000260231.1:ENST00000566699.1:chr7:+:337:543	chr7	+	139877397	139877604	139877397	139877604	1	139877397,	139877604,
ENSG00000260260.1	ENSG00000260260.1:ENST00000563192.1:chr16:-:233:328	chr16	-	2204810	2204906	2204810	2204906	1	2204810,	2204906,
ENSG00000260260.1	ENSG00000260260.1:ENST00000563192.1:chr16:-:49:75	chr16	-	2205283	2205310	2205283	2205310	1	2205283,	2205310,
ENSG00000260265.1	ENSG00000260265.1:ENST00000561705.1:chr4:-:44:97	chr4	-	76009829	76009883	76009829	76009883	1	76009829,	76009883,
ENSG00000260267.1	ENSG00000260267.1:ENST00000564629.1:chr16:-:433:612	chr16	-	31470444	31470624	31470444	31470624	1	31470444,	31470624,
ENSG00000260442.1	LOC100289092:NR_046288:chr16:-:229:537	chr16	-	28890320	28891013	28890320	28891013	2	28890320,28890809,	28890425,28891013,
ENSG00000260442.1	LOC100289092:NR_046290:chr16:-:229:465	chr16	-	28890339	28891013	28890339	28891013	2	28890339,28890862,	28890425,28891013,
ENSG00000260447.1	ENSG00000260447.1:ENST00000562027.1:chr16:+:172:357	chr16	+	2169379	2169980	2169379	2169980	2	2169379,2169801,	2169386,2169980,
ENSG00000260464.1	ENSG00000260464.1:ENST00000565336.1:chr1:+:425:436	chr1	+	94313154	94313166	94313154	94313166	1	94313154,	94313166,
ENSG00000260552.1	ENSG00000260552.1:ENST00000568654.1:chr18:-:123:218	chr18	-	33760348	33767288	33760348	33767288	2	33760348,33767197,	33760353,33767288,
ENSG00000260708.1	ENSG00000260708.1:ENST00000564152.1:chr22:-:398:418	chr22	-	47158041	47158062	47158041	47158062	1	47158041,	47158062,
ENSG00000260708.1	ENSG00000260708.1:ENST00000564152.1:chr22:-:364:429	chr22	-	47158030	47158096	47158030	47158096	1	47158030,	47158096,
ENSG00000260708.1	ENSG00000260708.1:ENST00000564152.1:chr22:-:266:367	chr22	-	47158092	47158194	47158092	47158194	1	47158092,	47158194,
ENSG00000260833.2	XLOC_012457:TCONS_00025623:chr17:-:518:637	chr17	-	36606954	36607656	36606954	36607656	2	36606954,36607549,	36606967,36607656,
ENSG00000260833.2	ENSG00000260833.2:ENST00000582919.1:chr17:-:276:404	chr17	-	36606883	36607914	36606883	36607914	2	36606883,36607869,	36606967,36607914,
ENSG00000260833.2	ENSG00000260833.2:ENST00000561550.2:chr17:-:5:340	chr17	-	36607580	36608638	36607580	36608638	3	36607580,36607869,36608561,	36607637,36608071,36608638,
ENSG00000260833.2	XLOC_012457:TCONS_00025623:chr17:-:126:476	chr17	-	36607697	36608638	36607697	36608638	3	36607697,36607869,36608561,	36607769,36608071,36608638,
ENSG00000260852.1	ENSG00000260852.1:ENST00000563777.1:chr16:-:23:238	chr16	-	30934351	30934567	30934351	30934567	1	30934351,	30934567,
ENSG00000260944.1	ENSG00000260944.1:ENST00000563280.1:chr16:-:31:102	chr16	-	86601264	86601336	86601264	86601336	1	86601264,	86601336,
ENSG00000261040.2	ENSG00000261040.2:ENST00000590346.1:chr17:-:401:445	chr17	-	58161110	58162501	58161110	58162501	2	58161110,58162473,	58161127,58162501,
ENSG00000261040.2	ENSG00000261040.2:ENST00000566140.1:chr17:-:160:201	chr17	-	58162459	58162501	58162459	58162501	1	58162459,	58162501,
ENSG00000261040.2	ENSG00000261040.2:ENST00000566140.1:chr17:-:13:36	chr17	-	58165617	58165641	58165617	58165641	1	58165617,	58165641,
ENSG00000261071.1	ENSG00000261071.1:ENST00000566170.1:chr6:-:39:293	chr6	-	13615093	13615348	13615093	13615348	1	13615093,	13615348,
ENSG00000261183.1	ENSG00000261183.1:ENST00000568525.1:chr15:-:194:322	chr15	-	41130683	41130812	41130683	41130812	1	41130683,	41130812,
ENSG00000261183.1	ENSG00000261183.1:ENST00000564302.1:chr15:-:146:220	chr15	-	41130872	41136439	41130872	41136439	2	41130872,41136376,	41130884,41136439,
ENSG00000261188.1	ENSG00000261188.1:ENST00000565764.1:chr22:+:4:195	chr22	+	26908524	26908716	26908524	26908716	1	26908524,	26908716,
ENSG00000261373.1	ENSG00000261373.1:ENST00000562866.1:chr16:+:48:59	chr16	+	89778311	89778323	89778311	89778323	1	89778311,	89778323,
ENSG00000261373.1	ENSG00000261373.1:ENST00000562866.1:chr16:+:608:667	chr16	+	89782989	89783049	89782989	89783049	1	89782989,	89783049,
ENSG00000261373.1	ENSG00000261373.1:ENST00000562298.1:chr16:+:54:152	chr16	+	89782989	89783794	89782989	89783794	2	89782989,89783751,	89783045,89783794,
ENSG00000261373.1	ENSG00000261373.1:ENST00000562866.1:chr16:+:660:917	chr16	+	89783041	89783299	89783041	89783299	1	89783041,	89783299,
ENSG00000261373.1	ENSG00000261373.1:ENST00000562866.1:chr16:+:914:973	chr16	+	89783295	89783794	89783295	89783794	2	89783295,89783751,	89783312,89783794,
ENSG00000261373.1	ENSG00000261373.1:ENST00000562298.1:chr16:+:217:798	chr16	+	89783858	89784440	89783858	89784440	1	89783858,	89784440,
ENSG00000261766.1	ENSG00000261766.1:ENST00000567731.1:chr16:-:165:191	chr16	-	28873838	28874496	28873838	28874496	2	28873838,28874482,	28873851,28874496,
ENSG00000261770.1	ENSG00000261824.2:ENST00000561521.1:chr19:-:217:282	chr19	-	28223725	28223791	28223725	28223791	1	28223725,	28223791,
ENSG00000261770.1	ENSG00000261824.2:ENST00000590677.1:chr19:-:428:490	chr19	-	28237152	28237215	28237152	28237215	1	28237152,	28237215,
ENSG00000261770.1	ENSG00000261824.2:ENST00000590677.1:chr19:-:396:425	chr19	-	28237217	28237247	28237217	28237247	1	28237217,	28237247,
ENSG00000261770.1	ENSG00000261824.2:ENST00000586248.1:chr19:-:310:366	chr19	-	28283919	28283976	28283919	28283976	1	28283919,	28283976,
ENSG00000261770.1	ENSG00000261824.2:ENST00000586248.1:chr19:-:118:195	chr19	-	28284090	28284168	28284090	28284168	1	28284090,	28284168,
ENSG00000261770.1	ENSG00000261824.2:ENST00000590523.1:chr19:-:372:458	chr19	-	28284090	28284476	28284090	28284476	2	28284090,28284439,	28284140,28284476,
ENSG00000261770.1	ENSG00000261824.2:ENST00000590523.1:chr19:-:59:139	chr19	-	28284708	28284789	28284708	28284789	1	28284708,	28284789,
ENSG00000261801.1	ENSG00000261801.1:ENST00000565689.1:chr15:-:92:394	chr15	-	74200751	74208729	74200751	74208729	3	74200751,74204525,74208683,	74200889,74204644,74208729,
ENSG00000261801.1	ENSG00000261801.1:ENST00000568229.1:chr15:-:265:549	chr15	-	74200751	74212206	74200751	74212206	3	74200751,74204525,74212178,	74200889,74204644,74212206,
ENSG00000261801.1	ENSG00000261801.1:ENST00000568087.1:chr15:-:339:560	chr15	-	74202116	74212206	74202116	74212206	3	74202116,74204525,74212178,	74202191,74204644,74212206,
ENSG00000261801.1	ENSG00000261801.1:ENST00000562965.1:chr15:-:357:563	chr15	-	74211999	74212206	74211999	74212206	1	74211999,	74212206,
ENSG00000261801.1	ENSG00000261801.1:ENST00000562130.1:chr15:-:182:307	chr15	-	74211720	74212300	74211720	74212300	2	74211720,74212178,	74211724,74212300,
ENSG00000261801.1	ENSG00000261801.1:ENST00000562965.1:chr15:-:263:388	chr15	-	74212174	74212300	74212174	74212300	1	74212174,	74212300,
ENSG00000261801.1	ENSG00000261801.1:ENST00000562739.1:chr15:-:9:140	chr15	-	74212280	74220027	74212280	74220027	2	74212280,74219994,	74212379,74220027,
ENSG00000261801.1	ENSG00000261801.1:ENST00000566675.1:chr15:-:112:273	chr15	-	74211668	74220432	74211668	74220432	3	74211668,74212300,74220405,	74211724,74212379,74220432,
ENSG00000261804.1	ENSG00000261804.1:ENST00000566383.1:chr16:+:150:233	chr16	+	53407554	53407638	53407554	53407638	1	53407554,	53407638,
ENSG00000261804.1	ENSG00000261804.1:ENST00000566383.1:chr16:+:241:384	chr16	+	53407645	53407789	53407645	53407789	1	53407645,	53407789,
ENSG00000261804.1	ENSG00000261804.1:ENST00000565189.1:chr16:+:51:137	chr16	+	53412418	53412505	53412418	53412505	1	53412418,	53412505,
ENSG00000261838.1	ENSG00000261838.1:ENST00000563072.1:chr16:+:185:400	chr16	+	81105787	81110196	81105787	81110196	2	81105787,81110028,	81105835,81110196,
ENSG00000261971.2	ENSG00000261971.2:ENST00000572574.1:chr16:-:43:354	chr16	-	3109016	3109328	3109016	3109328	1	3109016,	3109328,
ENSG00000261997.1	ENSG00000261997.1:ENST00000576365.1:chr16:+:3638:3778	chr16	+	55575749	55575890	55575749	55575890	1	55575749,	55575890,
ENSG00000262049.1	ENSG00000262049.1:ENST00000575312.1:chr17:-:149:304	chr17	-	79670025	79670181	79670025	79670181	1	79670025,	79670181,
ENSG00000262089.1	LOC100506713:NR_040089:chr17:-:136:312	chr17	-	6888779	6915517	6888779	6915517	3	6888779,6913114,6915514,	6888859,6913208,6915517,
ENSG00000262879.1	ENSG00000262879.1:ENST00000573341.1:chr17:-:63:458	chr17	-	45149880	45177551	45149880	45177551	2	45149880,45177200,	45149925,45177551,
ENSG00000263004.1	ENSG00000263004.1:ENST00000576313.1:chr17:-:113:358	chr17	-	55156597	55162272	55156597	55162272	2	55156597,55162200,	55156771,55162272,
ENSG00000263072.1	ENSG00000263072.1:ENST00000571449.1:chr16:-:197:223	chr16	-	3184633	3184660	3184633	3184660	1	3184633,	3184660,
ENSG00000263072.1	ENSG00000263072.1:ENST00000576590.1:chr16:-:90:392	chr16	-	3182051	3184784	3182051	3184784	3	3182051,3182850,3184630,	3182104,3182946,3184784,
ENSG00000263470.1	XLOC_012281:TCONS_00025460:chr17:+:102:419	chr17	+	63096875	63097357	63096875	63097357	2	63096875,63097324,	63097160,63097357,
ENSG00000263753.2	ENSG00000263753.2:ENST00000580082.1:chr18:+:5:31	chr18	+	5238131	5238158	5238131	5238158	1	5238131,	5238158,
ENSG00000263753.2	ENSG00000263753.2:ENST00000580082.1:chr18:+:51:173	chr18	+	5238177	5238300	5238177	5238300	1	5238177,	5238300,
ENSG00000263753.2	ENSG00000263753.2:ENST00000582363.1:chr18:+:842:1060	chr18	+	5238924	5240280	5238924	5240280	2	5238924,5240185,	5239048,5240280,
ENSG00000263753.2	ENSG00000263753.2:ENST00000581471.2:chr18:+:1166:1237	chr18	+	5238990	5239062	5238990	5239062	1	5238990,	5239062,
ENSG00000263753.2	ENSG00000263753.2:ENST00000580684.1:chr18:+:442:558	chr18	+	5238990	5241756	5238990	5241756	2	5238990,5241697,	5239048,5241756,
ENSG00000263753.2	ENSG00000263753.2:ENST00000581471.2:chr18:+:1352:1450	chr18	+	5239176	5239275	5239176	5239275	1	5239176,	5239275,
ENSG00000264207.1	ENSG00000264207.1:ENST00000577853.1:chr1:-:226:333	chr1	-	149803775	149803883	149803775	149803883	1	149803775,	149803883,
ENSG00000264247.1	ENSG00000264247.1:ENST00000580048.1:chr18:-:878:922	chr18	-	72264137	72264182	72264137	72264182	1	72264137,	72264182,
ENSG00000264247.1	ENSG00000264247.1:ENST00000580048.1:chr18:-:619:948	chr18	-	72264111	72264441	72264111	72264441	1	72264111,	72264441,
ENSG00000264247.1	ENSG00000264247.1:ENST00000577806.1:chr18:-:40:378	chr18	-	72261008	72264765	72261008	72264765	2	72261008,72264493,	72261075,72264765,
ENSG00000264247.1	ENSG00000264247.1:ENST00000580048.1:chr18:-:250:588	chr18	-	72264471	72264810	72264471	72264810	1	72264471,	72264810,
ENSG00000264575.1	ENSG00000264575.1:ENST00000581067.1:chr18:-:947:1234	chr18	-	5237362	5237650	5237362	5237650	1	5237362,	5237650,
ENSG00000264920.1	ENSG00000264920.1:ENST00000580459.1:chr17:-:1886:1891	chr17	-	45971266	45971272	45971266	45971272	1	45971266,	45971272,
ENSG00000264920.1	ENSG00000264920.1:ENST00000577279.1:chr17:-:60:269	chr17	-	45968744	45973075	45968744	45973075	2	45968744,45973068,	45968947,45973075,
ENSG00000264920.1	ENSG00000264920.1:ENST00000582787.1:chr17:-:103:114	chr17	-	45971319	45973075	45971319	45973075	2	45971319,45973068,	45971324,45973075,
ENSG00000265666.1	ENSG00000265666.1:ENST00000581080.1:chr17:-:1265:1489	chr17	-	38497418	38497643	38497418	38497643	1	38497418,	38497643,
ENSG00000265688.1	ENSG00000265688.1:ENST00000582106.1:chr17:+:34:498	chr17	+	79885738	79886203	79885738	79886203	1	79885738,	79886203,
ENSG00000265688.1	ENSG00000265688.1:ENST00000582106.1:chr17:+:239:580	chr17	+	79885943	79886285	79885943	79886285	1	79885943,	79886285,
ENSG00000265992.1	ENSG00000265992.1:ENST00000583516.1:chr3:-:1015:1101	chr3	-	54672782	54672869	54672782	54672869	1	54672782,	54672869,
ENSG00000265992.1	ENSG00000265992.1:ENST00000583516.1:chr3:-:740:952	chr3	-	54672931	54673144	54672931	54673144	1	54672931,	54673144,
ENSG00000265992.1	ENSG00000265992.1:ENST00000583516.1:chr3:-:396:410	chr3	-	54673473	54673488	54673473	54673488	1	54673473,	54673488,
ENSG00000265992.1	ENSG00000265992.1:ENST00000583516.1:chr3:-:323:382	chr3	-	54673501	54673561	54673501	54673561	1	54673501,	54673561,
ENSG00000266088.1	ENSG00000266088.1:ENST00000578280.1:chr17:+:33:125	chr17	+	38676975	38677068	38676975	38677068	1	38676975,	38677068,
ENSG00000266402.2	ENSG00000266402.2:ENST00000582965.1:chr17:+:51:104	chr17	+	62223609	62223663	62223609	62223663	1	62223609,	62223663,
ENSG00000266962.1	ENSG00000266962.1:ENST00000590513.1:chr17:-:1186:1926	chr17	-	40704839	40705580	40704839	40705580	1	40704839,	40705580,
ENSG00000266962.1	ENSG00000266962.1:ENST00000590513.1:chr17:-:701:748	chr17	-	40706017	40706065	40706017	40706065	1	40706017,	40706065,
ENSG00000266962.1	ENSG00000266962.1:ENST00000590513.1:chr17:-:254:475	chr17	-	40706290	40706512	40706290	40706512	1	40706290,	40706512,
ENSG00000266970.1	XLOC_012324:TCONS_00025513:chr17:+:43:144	chr17	+	76357871	76358824	76357871	76358824	2	76357871,76358753,	76357902,76358824,
ENSG00000267100.1	ENSG00000267100.1:ENST00000591501.1:chr19:-:524:619	chr19	-	10763900	10763996	10763900	10763996	1	10763900,	10763996,
ENSG00000267100.1	XLOC_013222:TCONS_00027183:chr19:-:372:524	chr19	-	10763910	10764184	10763910	10764184	2	10763910,10764065,	10763944,10764184,
ENSG00000267100.1	ENSG00000267100.1:ENST00000591501.1:chr19:-:336:458	chr19	-	10764061	10764184	10764061	10764184	1	10764061,	10764184,
ENSG00000267100.1	ENSG00000267100.1:ENST00000591501.1:chr19:-:133:183	chr19	-	10764336	10764387	10764336	10764387	1	10764336,	10764387,
ENSG00000267100.1	XLOC_013222:TCONS_00027184:chr19:-:122:199	chr19	-	10763900	10764428	10763900	10764428	2	10763900,10764394,	10763944,10764428,
ENSG00000267100.1	ENSG00000267100.1:ENST00000591501.1:chr19:-:92:130	chr19	-	10764389	10764428	10764389	10764428	1	10764389,	10764428,
ENSG00000267100.1	ENSG00000267100.1:ENST00000591501.1:chr19:-:7:45	chr19	-	10764474	10764513	10764474	10764513	1	10764474,	10764513,
ENSG00000267169.1	ENSG00000267169.1:ENST00000588387.1:chr19:+:80:286	chr19	+	14265998	14266205	14265998	14266205	1	14265998,	14266205,
ENSG00000267175.1	ENSG00000267279.1:ENST00000587754.1:chr18:-:6:287	chr18	-	59272248	59273884	59272248	59273884	2	59272248,59273698,	59272344,59273884,
ENSG00000267175.1	ENSG00000267279.1:ENST00000586949.1:chr18:-:51:302	chr18	-	59273650	59274098	59273650	59274098	2	59273650,59274083,	59273887,59274098,
ENSG00000267254.1	ENSG00000267254.1:ENST00000587413.1:chr19:+:26:250	chr19	+	37288445	37288670	37288445	37288670	1	37288445,	37288670,
ENSG00000267278.1	ENSG00000267278.1:ENST00000592422.1:chr17:+:51:344	chr17	+	43326901	43344594	43326901	43344594	3	43326901,43332504,43344479,	43326999,43332585,43344594,
ENSG00000267321.1	ENSG00000267321.1:ENST00000592381.1:chr17:+:25:105	chr17	+	33895163	33895244	33895163	33895244	1	33895163,	33895244,
ENSG00000267321.1	ENSG00000267321.1:ENST00000592381.1:chr17:+:170:244	chr17	+	33895308	33895383	33895308	33895383	1	33895308,	33895383,
ENSG00000267321.1	ENSG00000267321.1:ENST00000592381.1:chr17:+:252:272	chr17	+	33895390	33895411	33895390	33895411	1	33895390,	33895411,
ENSG00000267321.1	ENSG00000267321.1:ENST00000592381.1:chr17:+:290:316	chr17	+	33895428	33895455	33895428	33895455	1	33895428,	33895455,
ENSG00000267321.1	ENSG00000267321.1:ENST00000592381.1:chr17:+:328:441	chr17	+	33895466	33900955	33895466	33900955	2	33895466,33900895,	33895520,33900955,
ENSG00000267321.1	ENSG00000267321.1:ENST00000592381.1:chr17:+:444:560	chr17	+	33900957	33901074	33900957	33901074	1	33900957,	33901074,
ENSG00000267577.1	ENSG00000267577.1:ENST00000591665.1:chr19:+:1171:1308	chr19	+	55674154	55688574	55674154	55688574	2	55674154,55688451,	55674169,55688574,
ENSG00000267577.1	ENSG00000267577.1:ENST00000591665.1:chr19:+:1328:1387	chr19	+	55688593	55688653	55688593	55688653	1	55688593,	55688653,
ENSG00000267633.1	ENSG00000267633.1:ENST00000591826.1:chr19:-:303:320	chr19	-	13883428	13883446	13883428	13883446	1	13883428,	13883446,
ENSG00000267703.1	ENSG00000267703.1:ENST00000587343.1:chr19:+:281:310	chr19	+	16552037	16554305	16552037	16554305	2	16552037,16554288,	16552050,16554305,
ENSG00000267751.1	ENSG00000267751.1:ENST00000588290.1:chr19:-:350:382	chr19	-	567505	567538	567505	567538	1	567505,	567538,
ENSG00000268001.1	ENSG00000268001.1:ENST00000602172.1:chr19:+:90:155	chr19	+	48759021	48759643	48759021	48759643	2	48759021,48759607,	48759051,48759643,
ENSG00000268001.1	ENSG00000268001.1:ENST00000602172.1:chr19:+:436:576	chr19	+	48759923	48760064	48759923	48760064	1	48759923,	48760064,
ENSG00000268129.1	ENSG00000268129.1:ENST00000597953.1:chr3:-:324:410	chr3	-	142719898	142719985	142719898	142719985	1	142719898,	142719985,
ENSG00000268129.1	ENSG00000268129.1:ENST00000597953.1:chr3:-:137:343	chr3	-	142719965	142720172	142719965	142720172	1	142719965,	142720172,
ENSG00000268362.1	ENSG00000268362.1:ENST00000594934.1:chr19:+:147:206	chr19	+	24216393	24229015	24216393	24229015	2	24216393,24228985,	24216423,24229015,
ENSG00000268388.1	ENSG00000268388.1:ENST00000593604.1:chr16:-:259:348	chr16	-	86524484	86524574	86524484	86524574	1	86524484,	86524574,
ENSG00000268516.1	ENSG00000268516.1:ENST00000597230.1:chr19:-:324:524	chr19	-	58770818	58771019	58770818	58771019	1	58770818,	58771019,
ENSG00000268516.1	ENSG00000268516.1:ENST00000597230.1:chr19:-:101:283	chr19	-	58789890	58790073	58789890	58790073	1	58789890,	58790073,
ENSG00000268584.1	ENSG00000268584.1:ENST00000595595.1:chr10:+:69:257	chr10	+	75385822	75386011	75385822	75386011	1	75385822,	75386011,
ENSG00000268601.1	ENSG00000268601.1:ENST00000595680.1:chr19:-:251:262	chr19	-	44298753	44298765	44298753	44298765	1	44298753,	44298765,
ENSG00000269293.2	ENSG00000269293.2:ENST00000600652.1:chr6:-:749:835	chr6	-	28090899	28090986	28090899	28090986	1	28090899,	28090986,
ENSG00000269293.2	ENSG00000269293.2:ENST00000602810.1:chr6:-:67:162	chr6	-	28090948	28104577	28090948	28104577	2	28090948,28104522,	28090989,28104577,
ENSG00000269609.1	ENSG00000269609.1:ENST00000473970.2:chr10:+:25:114	chr10	+	104209612	104209702	104209612	104209702	1	104209612,	104209702,
ENSG00000269609.1	ENSG00000269609.1:ENST00000492465.2:chr10:+:221:394	chr10	+	104209994	104211206	104209994	104211206	2	104209994,104211155,	104210117,104211206,
ENSG00000269609.1	ENSG00000269609.1:ENST00000473970.2:chr10:+:243:410	chr10	+	104209994	104215168	104209994	104215168	2	104209994,104215093,	104210087,104215168,
ENSG00000269609.1	ENSG00000269609.1:ENST00000492465.2:chr10:+:292:636	chr10	+	104210065	104215131	104210065	104215131	4	104210065,104211155,104211846,104215093,	104210117,104211312,104211944,104215131,
ENSG00000269609.1	ENSG00000269609.1:ENST00000473970.2:chr10:+:463:711	chr10	+	104215220	104215469	104215220	104215469	1	104215220,	104215469,
ENSG00000269640.1	ENSG00000269640.1:ENST00000534306.1:chr19:+:235:243	chr19	+	17516737	17516746	17516737	17516746	1	17516737,	17516746,
ENSG00000269640.1	ENSG00000269640.1:ENST00000534306.1:chr19:+:289:384	chr19	+	17516791	17516968	17516791	17516968	2	17516791,17516885,	17516804,17516968,
ENSG00000269640.1	ENSG00000269640.1:ENST00000598546.1:chr19:+:239:346	chr19	+	17516791	17524064	17516791	17524064	4	17516791,17517053,17523905,17524029,	17516804,17517105,17523913,17524064,
ENSG00000269729.1	ENSG00000269729.1:ENST00000599127.1:chr19:-:11:64	chr19	-	46682772	46683893	46682772	46683893	2	46682772,46683861,	46682794,46683893,
ENSG00000269893.2	ENSG00000269893.2:ENST00000602414.1:chr4:+:111:269	chr4	+	119199974	119200133	119199974	119200133	1	119199974,	119200133,
ENSG00000269893.2	ENSG00000269893.2:ENST00000602414.1:chr4:+:289:333	chr4	+	119200152	119200197	119200152	119200197	1	119200152,	119200197,
ENSG00000269893.2	ENSG00000269893.2:ENST00000602414.1:chr4:+:356:370	chr4	+	119200219	119200234	119200219	119200234	1	119200219,	119200234,
ENSG00000269893.2	ENSG00000269893.2:ENST00000602414.1:chr4:+:452:562	chr4	+	119200566	119200869	119200566	119200869	2	119200566,119200778,	119200586,119200869,
ENSG00000269893.2	ENSG00000269893.2:ENST00000602414.1:chr4:+:459:470	chr4	+	119200573	119200585	119200573	119200585	1	119200573,	119200585,
ENSG00000269893.2	ENSG00000269893.2:ENST00000602414.1:chr4:+:567:620	chr4	+	119200873	119200927	119200873	119200927	1	119200873,	119200927,
ENSG00000269902.1	ENSG00000270069.1:ENST00000602461.1:chrX:-:94:105	chrX	-	45629571	45629583	45629571	45629583	1	45629571,	45629583,
ENSG00000270049.1	ENSG00000270049.1:ENST00000602596.1:chr16:+:92:358	chr16	+	67515378	67518235	67515378	67518235	2	67515378,67518012,	67515422,67518235,
ENSG00000270170.1	ENSG00000270170.1:ENST00000602845.1:chr3:+:94:393	chr3	+	196669587	196669887	196669587	196669887	1	196669587,	196669887,
ENSG00000270170.1	ENSG00000270170.1:ENST00000602845.1:chr3:+:445:534	chr3	+	196669938	196670028	196669938	196670028	1	196669938,	196670028,
ENSG00000270170.1	ENSG00000270170.1:ENST00000602845.1:chr3:+:618:809	chr3	+	196670111	196670303	196670111	196670303	1	196670111,	196670303,
ENSG00000270170.1	ENSG00000270170.1:ENST00000602845.1:chr3:+:727:894	chr3	+	196670220	196670388	196670220	196670388	1	196670220,	196670388,
ENSG00000270504.1	ENSG00000270504.1:ENST00000603791.1:chr6:+:39:335	chr6	+	3751383	3751680	3751383	3751680	1	3751383,	3751680,
ENSG00000270504.1	ENSG00000270504.1:ENST00000603791.1:chr6:+:338:661	chr6	+	3751682	3752006	3751682	3752006	1	3751682,	3752006,
ENSG00000270607.1	LOC100126784:NR_015384:chr11:-:171:428	chr11	-	19735789	19736047	19735789	19736047	1	19735789,	19736047,
ENSG00000270673.1	ENSG00000270673.1:ENST00000603538.1:chr8:-:139:246	chr8	-	64080754	64080862	64080754	64080862	1	64080754,	64080862,
ENSG00000270959.1	ENSG00000270959.1:ENST00000605573.1:chr3:-:440:775	chr3	-	187871069	187871405	187871069	187871405	1	187871069,	187871405,
ENSG00000271122.1	ENSG00000271122.1:ENST00000605778.1:chr7:+:191:226	chr7	+	35735014	35735050	35735014	35735050	1	35735014,	35735050,
ENSG00000271122.1	ENSG00000271122.1:ENST00000605778.1:chr7:+:371:457	chr7	+	35735194	35735281	35735194	35735281	1	35735194,	35735281,
ENSG00000271270.1	ENSG00000271270.1:ENST00000605830.1:chr3:+:271:597	chr3	+	129624529	129624856	129624529	129624856	1	129624529,	129624856,
ENSG00000271334.1	ENSG00000271334.1:ENST00000603514.1:chr5:+:4:84	chr5	+	39521624	39521705	39521624	39521705	1	39521624,	39521705,
ENSG00000271646.1	ENSG00000271646.1:ENST00000605834.1:chr4:+:493:735	chr4	+	185396448	185396691	185396448	185396691	1	185396448,	185396691,
ENSG00000271780.1	ENSG00000271780.1:ENST00000607414.1:chr14:+:85:294	chr14	+	102414768	102414978	102414768	102414978	1	102414768,	102414978,
ENSG00000272173.1	ENSG00000272173.1:ENST00000607421.1:chr12:-:41:214	chr12	-	7053552	7053726	7053552	7053726	1	7053552,	7053726,
ENSG00000272269.1	ENSG00000272269.1:ENST00000606771.1:chr6:+:23:313	chr6	+	17706510	17706801	17706510	17706801	1	17706510,	17706801,
ENSG00000272269.1	ENSG00000272269.1:ENST00000606771.1:chr6:+:129:200	chr6	+	17706616	17706688	17706616	17706688	1	17706616,	17706688,
ENSG00000272269.1	ENSG00000272269.1:ENST00000606771.1:chr6:+:667:786	chr6	+	17707154	17707274	17707154	17707274	1	17707154,	17707274,
ENSG00000272288.1	ENSG00000272288.1:ENST00000606496.1:chr6:+:41:199	chr6	+	34664762	34665082	34664762	34665082	2	34664762,34664935,	34664774,34665082,
ENSG00000272476.1	ENSG00000272476.1:ENST00000606070.1:chr6:+:247:483	chr6	+	108278863	108279100	108278863	108279100	1	108278863,	108279100,
ENSG00000272686.1	ENSG00000272686.1:ENST00000607957.1:chr7:+:274:447	chr7	+	123389395	123389569	123389395	123389569	1	123389395,	123389569,
ENSG00000272688.1	ENSG00000272688.1:ENST00000609924.1:chr18:-:18:128	chr18	-	3246955	3247066	3246955	3247066	1	3246955,	3247066,
ENSG00000272695.1	ENSG00000272695.1:ENST00000608651.1:chr13:+:85:93	chr13	+	114567225	114567234	114567225	114567234	1	114567225,	114567234,
ENSG00000272734.1	ENSG00000272734.1:ENST00000418273.2:chr10:-:2331:2504	chr10	-	88725618	88725792	88725618	88725792	1	88725618,	88725792,
ENSG00000272734.1	ENSG00000272734.1:ENST00000418273.2:chr10:-:178:534	chr10	-	88730533	88730890	88730533	88730890	1	88730533,	88730890,
ENSG00000272841.1	ENSG00000272841.1:ENST00000608721.1:chr6:-:111:287	chr6	-	161413086	161413263	161413086	161413263	1	161413086,	161413263,
ENSG00000272870.1	XLOC_004165:TCONS_00009166:chr4:-:295:462	chr4	-	174264483	174290743	174264483	174290743	2	174264483,174290584,	174264492,174290743,
ENSG00000272870.1	ENSG00000272870.1:ENST00000608892.1:chr4:-:53:250	chr4	-	174290545	174290743	174290545	174290743	1	174290545,	174290743,
ENSG00000272870.1	XLOC_004165:TCONS_00008647:chr4:-:57:299	chr4	-	174285307	174290911	174285307	174290911	3	174285307,174290584,174290889,	174285349,174290763,174290911,
ENSG00000272870.1	XLOC_004165:TCONS_00008646:chr4:-:142:306	chr4	-	174291531	174291696	174291531	174291696	1	174291531,	174291696,
ENSG00000272888.1	ENSG00000272888.1:ENST00000553829.1:chr15:+:20:64	chr15	+	93425981	93426026	93425981	93426026	1	93425981,	93426026,
ENSG00000272888.1	ENSG00000272888.1:ENST00000553829.1:chr15:+:111:236	chr15	+	93426072	93426198	93426072	93426198	1	93426072,	93426198,
ENSG00000272888.1	ENSG00000272888.1:ENST00000554133.1:chr15:+:1304:1384	chr15	+	93435237	93440969	93435237	93440969	2	93435237,93440953,	93435302,93440969,
ENSG00000272888.1	ENSG00000272888.1:ENST00000554133.1:chr15:+:1421:1525	chr15	+	93441005	93441110	93441005	93441110	1	93441005,	93441110,
ENSG00000272913.1	ENSG00000272913.1:ENST00000609975.1:chr2:-:99:461	chr2	-	96191988	96192351	96191988	96192351	1	96191988,	96192351,
ENSG00000273015.1	ENSG00000273015.1:ENST00000609803.1:chr12:-:65:427	chr12	-	46121130	46121493	46121130	46121493	1	46121130,	46121493,
ENSG00000273061.1	ENSG00000273061.1:ENST00000607997.1:chr9:-:85:267	chr9	-	4679013	4679417	4679013	4679417	2	4679013,4679386,	4679165,4679417,
ENSG00000273162.1	ENSG00000273162.1:ENST00000609242.1:chr10:-:480:671	chr10	-	102820090	102820282	102820090	102820282	1	102820090,	102820282,
ENSG00000273270.1	ENSG00000273270.1:ENST00000608477.1:chr7:-:289:705	chr7	-	128170417	128170834	128170417	128170834	1	128170417,	128170834,
ENSG00000273297.1	ENSG00000273297.1:ENST00000609209.1:chr7:-:45:227	chr7	-	134103601	134117123	134103601	134117123	2	134103601,134117065,	134103726,134117123,
ENSG00000273344.1	XLOC_006301:TCONS_00013641:chr7:+:153:629	chr7	+	154795306	154806821	154795306	154806821	3	154795306,154795671,154806797,	154795586,154795844,154806821,
ENSG00000273344.1	XLOC_006301:TCONS_00013641:chr7:+:401:532	chr7	+	154795554	154795771	154795554	154795771	2	154795554,154795671,	154795586,154795771,
ENSG00000273344.1	ENSG00000273344.1:ENST00000608317.1:chr7:+:492:782	chr7	+	154795649	154795940	154795649	154795940	1	154795649,	154795940,
ENSG00000273344.1	XLOC_006301:TCONS_00013645:chr7:+:481:738	chr7	+	154795649	154796113	154795649	154796113	2	154795649,154796050,	154795844,154796113,
EP400NL	EP400NL:NR_003290:chr12:+:281:454	chr12	+	132593125	132599074	132593125	132599074	2	132593125,132599002,	132593227,132599074,
FLJ10038	FLJ10038:NR_026891:chr15:-:148:375	chr15	-	50646700	50646928	50646700	50646928	1	50646700,	50646928,
FLJ10038	FLJ10038:NR_026891:chr15:-:6:593	chr15	-	50646482	50647070	50646482	50647070	1	50646482,	50647070,
FLJ20021	FLJ20021:NR_033874:chr4:+:290:682	chr4	+	102269537	102269930	102269537	102269930	1	102269537,	102269930,
FLJ22447	FLJ22447:NR_039985:chr14:+:13:108	chr14	+	62037270	62037366	62037270	62037366	1	62037270,	62037366,
FLJ22447	FLJ22447:NR_039985:chr14:+:158:433	chr14	+	62037415	62120497	62037415	62120497	3	62037415,62117679,62120340,	62037478,62117735,62120497,
FLJ39051	FLJ39051:NR_033839:chr11:-:38:265	chr11	-	126212097	126225444	126212097	126225444	2	126212097,126225336,	126212217,126225444,
FRG1B	FRG1B:NR_003579:chr20:+:51:197	chr20	+	29611929	29612076	29611929	29612076	1	29611929,	29612076,
FRG1B	FRG1B:NR_003579:chr20:+:264:320	chr20	+	29614301	29623159	29614301	29623159	2	29614301,29623128,	29614327,29623159,
FRMD6-AS1	FRMD6-AS1:NR_037676:chr14:-:686:856	chr14	-	52117605	52117776	52117605	52117776	1	52117605,	52117776,
HIATL2	HIATL2:NR_002894:chr9:-:277:666	chr9	-	99708445	99775585	99708445	99775585	5	99708445,99711836,99721116,99735134,99775540,	99708503,99711964,99721179,99735230,99775585,
HLA-H	HLA-H:NR_001434:chr6_mann_hap4:+:493:1020	chr6_mann_hap4	+	1150543	1151656	1150543	1151656	2	1150543,1151387,	1150802,1151656,
LINC00239	LINC00239:NR_026774:chr14:+:181:579	chr14	+	102198142	102198800	102198142	102198800	2	102198142,102198572,	102198313,102198800,
LINC00346	LINC00346:NR_027701:chr13:-:198:353	chr13	-	111522301	111522457	111522301	111522457	1	111522301,	111522457,
LOC100129794	LOC100129794:NR_033240:chr14:+:178:300	chr14	+	37641408	37641531	37641408	37641531	1	37641408,	37641531,
LOC100129794	LOC100129794:NR_033240:chr14:+:360:635	chr14	+	37641590	37641866	37641590	37641866	1	37641590,	37641866,
LOC100130093	LOC100130093:NR_024485:chr1:+:118:348	chr1	+	227916357	227919386	227916357	227919386	2	227916357,227919285,	227916487,227919386,
LOC100130776	LOC100130776:NR_027032:chr12:+:85:363	chr12	+	58120107	58120972	58120107	58120972	2	58120107,58120747,	58120161,58120972,
LOC100130776	LOC100130776:NR_027032:chr12:+:374:973	chr12	+	58120982	58121582	58120982	58121582	1	58120982,	58121582,
LOC100131655	LOC100131655:NR_040024:chr18:-:129:206	chr18	-	74534044	74534122	74534044	74534122	1	74534044,	74534122,
LOC100132707	LOC100132707:NR_024476:chr7:+:132:449	chr7	+	154720358	154735866	154720358	154735866	3	154720358,154720665,154735736,	154720477,154720734,154735866,
LOC100133315	LOC100133315:NR_029192:chr11:-:377:916	chr11	-	71576882	71634399	71576882	71634399	5	71576882,71627119,71628666,71629930,71634354,	71576900,71627298,71628822,71630072,71634399,
LOC100288911	LOC100288911:NR_037631:chr2:-:275:430	chr2	-	36582282	36582438	36582282	36582438	1	36582282,	36582438,
LOC100289341	LOC100289341:NR_027447:chr9:-:109:462	chr9	-	139980806	139981160	139980806	139981160	1	139980806,	139981160,
LOC100505839	LOC100505839:NR_038940:chr10:+:221:244	chr10	+	105506757	105506781	105506757	105506781	1	105506757,	105506781,
LOC100505839	LOC100505839:NR_038940:chr10:+:324:440	chr10	+	105509545	105509662	105509545	105509662	1	105509545,	105509662,
LOC100505876	LOC100505876:NR_037879:chr2:+:209:451	chr2	+	37426847	37428867	37426847	37428867	3	37426847,37428190,37428784,	37426962,37428235,37428867,
LOC100507173	LOC100507173:NR_038293:chr6:+:146:235	chr6	+	27661959	27662049	27661959	27662049	1	27661959,	27662049,
LOC100507173	LOC100507173:NR_038292:chr6:+:102:185	chr6	+	27661959	27670130	27661959	27670130	2	27661959,27670092,	27662005,27670130,
LOC100507412	LOC100507412:NR_038958:chrUn_gl000220:+:703:804	chrUn_gl000220	+	121683	121912	121683	121912	2	121683,121828,	121701,121912,
LOC100507412	LOC100507412:NR_038958:chrUn_gl000220:+:32:121	chrUn_gl000220	+	97160	97250	97160	97250	1	97160,	97250,
LOC100507412	LOC100507412:NR_038958:chrUn_gl000220:+:141:191	chrUn_gl000220	+	97269	97320	97269	97320	1	97269,	97320,
LOC100507412	LOC100507412:NR_038958:chrUn_gl000220:+:218:265	chrUn_gl000220	+	97346	97394	97346	97394	1	97346,	97394,
LOC100859930	LOC100859930:NR_045680:chr5:-:204:392	chr5	-	180258225	180258414	180258225	180258414	1	180258225,	180258414,
LOC145783	LOC145783:NR_015419:chr15:-:882:1238	chr15	-	57182234	57209815	57182234	57209815	3	57182234,57209262,57209737,	57182365,57209410,57209815,
LOC145783	LOC145783:NR_015419:chr15:-:437:736	chr15	-	57209960	57210260	57209960	57210260	1	57209960,	57210260,
LOC145783	LOC145783:NR_015419:chr15:-:303:497	chr15	-	57210199	57210394	57210199	57210394	1	57210199,	57210394,
LOC145783	LOC145783:NR_015419:chr15:-:52:276	chr15	-	57210420	57210645	57210420	57210645	1	57210420,	57210645,
LOC148413	LOC148413:NR_015434:chr1:+:104:292	chr1	+	1335013	1335670	1335013	1335670	2	1335013,1335537,	1335069,1335670,
LOC148413	LOC148413:NR_015434:chr1:+:417:539	chr1	+	1336095	1336218	1336095	1336218	1	1336095,	1336218,
LOC148413	LOC148413:NR_015434:chr1:+:642:827	chr1	+	1336320	1336506	1336320	1336506	1	1336320,	1336506,
LOC283788	LOC283788:NR_027436:chrUn_gl000219:-:809:1051	chrUn_gl000219	-	58958	83221	58958	83221	4	58958,78841,79936,83212,	58989,78952,80028,83221,
LOC283788	LOC283788:NR_027436:chrUn_gl000219:-:181:444	chrUn_gl000219	-	99197	99461	99197	99461	1	99197,	99461,
LOC283788	LOC283788:NR_027436:chrUn_gl000219:-:165:614	chrUn_gl000219	-	88392	99477	88392	99477	3	88392,97293,99125,	88420,97363,99477,
LOC401397	LOC401397:NR_015442:chr7:-:178:357	chr7	-	112757453	112757633	112757453	112757633	1	112757453,	112757633,
LOC401397	LOC401397:NR_015442:chr7:-:146:181	chr7	-	112757629	112758125	112757629	112758125	2	112757629,112758122,	112757662,112758125,
LOC440434	LOC440434:NR_036750:chr17:-:1037:1522	chr17	-	36351924	36358153	36351924	36358153	5	36351924,36352421,36353600,36357157,36358124,	36351996,36352526,36353765,36357272,36358153,
LOC646719	LOC646719:NR_046262:chr5:-:137:262	chr5	-	36876533	36876659	36876533	36876659	1	36876533,	36876659,
LOC729852	LOC729852:NR_034084:chr7:+:174:587	chr7	+	7713002	7917169	7713002	7917169	3	7713002,7841300,7916911,	7713084,7841374,7917169,
MGC21881	MGC21881:NR_015363:chr9:-:212:505	chr9	-	41954473	41954864	41954473	41954864	2	41954473,41954748,	41954651,41954864,
MIRLET7BHG	MIRLET7BHG:NR_027033:chr22:+:13:159	chr22	+	46481889	46482036	46481889	46482036	1	46481889,	46482036,
MIRLET7BHG	MIRLET7BHG:NR_027033:chr22:+:165:389	chr22	+	46493806	46505164	46493806	46505164	4	46493806,46494373,46499071,46505146,	46493890,46494438,46499129,46505164,
PARD6G-AS1	PARD6G-AS1:NR_028339:chr18:+:88:537	chr18	+	77905894	77926820	77905894	77926820	3	77905894,77920398,77926701,	77906137,77920486,77926820,
PARD6G-AS1	PARD6G-AS1:NR_028339:chr18:+:104:190	chr18	+	77905910	77905997	77905910	77905997	1	77905910,	77905997,
PARD6G-AS1	PARD6G-AS1:NR_028340:chr18:+:235:429	chr18	+	77906041	77936011	77906041	77936011	3	77906041,77933762,77935968,	77906137,77933818,77936011,
PP7080	PP7080:NR_024158:chr5:-:30:344	chr5	-	472022	473050	472022	473050	2	472022,472793,	472080,473050,
PPP4R1L	PPP4R1L:NR_003505:chr20:-:300:1118	chr20	-	56821013	56847830	56821013	56847830	6	56821013,56822377,56823170,56825942,56826812,56847824,	56821308,56822562,56823329,56826008,56826920,56847830,
PPP4R1L	PPP4R1L:NR_003505:chr20:-:14:337	chr20	-	56826888	56884481	56826888	56884481	5	56826888,56847824,56861369,56884281,56884474,	56826920,56847931,56861502,56884326,56884481,
XLOC_000021	XLOC_000021:TCONS_00000138:chr1:+:70:357	chr1	+	2361788	2362076	2361788	2362076	1	2361788,	2362076,
XLOC_000390	XLOC_000390:TCONS_00002154:chr1:+:13:81	chr1	+	148556035	148556104	148556035	148556104	1	148556035,	148556104,
XLOC_000390	XLOC_000390:TCONS_00002155:chr1:+:175:318	chr1	+	148556197	148556760	148556197	148556760	2	148556197,148556691,	148556272,148556760,
XLOC_000523	XLOC_000523:TCONS_00002216:chr1:+:100:246	chr1	+	201508367	201557710	201508367	201557710	2	201508367,201557666,	201508470,201557710,
XLOC_000721	XLOC_000721:TCONS_00001406:chr1:-:134:205	chr1	-	16126633	16126705	16126633	16126705	1	16126633,	16126705,
XLOC_001406	XLOC_001406:TCONS_00003611:chr2:+:1002:1073	chr2	+	27939884	27975809	27939884	27975809	2	27939884,27975738,	27939885,27975809,
XLOC_001406	XLOC_001406:TCONS_00003616:chr2:+:1042:1113	chr2	+	27950551	27975809	27950551	27975809	2	27950551,27975738,	27950552,27975809,
XLOC_001406	XLOC_001406:TCONS_00003617:chr2:+:13:84	chr2	+	27975737	27975809	27975737	27975809	1	27975737,	27975809,
XLOC_001453	XLOC_001453:TCONS_00003663:chr2:+:228:461	chr2	+	45402363	45402597	45402363	45402597	1	45402363,	45402597,
XLOC_001751	XLOC_001751:TCONS_00003048:chr2:+:1900:1929	chr2	+	172169675	172170023	172169675	172170023	2	172169675,172170000,	172169682,172170023,
XLOC_002624	XLOC_002624:TCONS_00006818:chr3:+:26:139	chr3	+	42055149	42055263	42055149	42055263	1	42055149,	42055263,
XLOC_003677	XLOC_003677:TCONS_00008880:chr4:+:28:177	chr4	+	123621633	123625620	123621633	123625620	2	123621633,123625558,	123621721,123625620,
XLOC_003782	XLOC_003782:TCONS_00008327:chr4:+:1155:1478	chr4	+	174431500	174431824	174431500	174431824	1	174431500,	174431824,
XLOC_004297	XLOC_004297:TCONS_00009876:chr5:+:112:438	chr5	+	13986166	13987242	13986166	13987242	2	13986166,13986966,	13986217,13987242,
XLOC_004366	XLOC_004366:TCONS_00009942:chr5:+:1469:1792	chr5	+	43066729	43067053	43066729	43067053	1	43066729,	43067053,
XLOC_004366	XLOC_004366:TCONS_00009942:chr5:+:2435:2563	chr5	+	43067695	43068159	43067695	43068159	2	43067695,43068071,	43067736,43068159,
XLOC_005175	XLOC_005175:TCONS_00011696:chr6:+:51:410	chr6	+	12322570	12335009	12322570	12335009	3	12322570,12322839,12334764,	12322627,12322897,12335009,
XLOC_005361	XLOC_005361:TCONS_00012535:chr6:+:1:246	chr6	+	80247547	80251309	80247547	80251309	3	80247547,80248444,80251233,	80247601,80248560,80251309,
XLOC_005361	XLOC_005361:TCONS_00012534:chr6:+:232:522	chr6	+	80247577	80251370	80247577	80251370	3	80247577,80248444,80251219,	80247601,80248560,80251370,
XLOC_005834	XLOC_005834:TCONS_00012278:chr6:-:178:372	chr6	-	133125888	133126083	133125888	133126083	1	133125888,	133126083,
XLOC_006450	XLOC_006450:TCONS_00013806:chr7:-:22:168	chr7	-	54874466	54874613	54874466	54874613	1	54874466,	54874613,
XLOC_006704	XLOC_006704:TCONS_00014599:chr8:+:31:270	chr8	+	9009283	9012572	9009283	9012572	2	9009283,9012475,	9009426,9012572,
XLOC_007241	XLOC_007241:TCONS_00015535:chr8:-:51:197	chr8	-	142264565	142264712	142264565	142264712	1	142264565,	142264712,
XLOC_008183	XLOC_008183:TCONS_00017336:chrX:-:92:226	chrX	-	71090205	71091179	71090205	71091179	3	71090205,71090531,71091167,	71090251,71090608,71091179,
XLOC_008704	XLOC_008704:TCONS_00018417:chr10:-:75:203	chr10	-	4790453	4806261	4790453	4806261	2	4790453,4806161,	4790482,4806261,
XLOC_008735	XLOC_008735:TCONS_00018888:chr10:-:12:167	chr10	-	13562415	13570533	13562415	13570533	3	13562415,13568137,13570472,	13562426,13568221,13570533,
XLOC_008735	XLOC_008735:TCONS_00018890:chr10:-:12:203	chr10	-	13566000	13570533	13566000	13570533	3	13566000,13568137,13570472,	13566047,13568221,13570533,
XLOC_009145	XLOC_009145:TCONS_00019312:chr11:+:31:78	chr11	+	61240236	61240284	61240236	61240284	1	61240236,	61240284,
XLOC_009575	XLOC_009575:TCONS_00019776:chr11:-:104:181	chr11	-	118796098	118796176	118796098	118796176	1	118796098,	118796176,
XLOC_009576	XLOC_009576:TCONS_00019777:chr11:-:90:275	chr11	-	118936610	118938321	118936610	118938321	2	118936610,118938207,	118936682,118938321,
XLOC_009920	XLOC_009920:TCONS_00020239:chr12:+:1006:1071	chr12	+	122511029	122512889	122511029	122512889	2	122511029,122512857,	122511063,122512889,
XLOC_010212	XLOC_010212:TCONS_00020940:chr12:-:121:471	chr12	-	118555249	118555600	118555249	118555600	1	118555249,	118555600,
XLOC_010212	XLOC_010212:TCONS_00021410:chr12:-:310:492	chr12	-	118555599	118558932	118555599	118558932	2	118555599,118558837,	118555687,118558932,
XLOC_010592	XLOC_010592:TCONS_00021992:chr13:-:1794:1844	chr13	-	45950317	45950368	45950317	45950368	1	45950317,	45950368,
XLOC_010709	XLOC_010709:TCONS_00022099:chr13:-:759:776	chr13	-	100738514	100738532	100738514	100738532	1	100738514,	100738532,
XLOC_010709	XLOC_010709:TCONS_00022099:chr13:-:253:315	chr13	-	100738975	100740943	100738975	100740943	2	100738975,100740886,	100738981,100740943,
XLOC_010709	XLOC_010709:TCONS_00022099:chr13:-:188:289	chr13	-	100740906	100741008	100740906	100741008	1	100740906,	100741008,
XLOC_011280	XLOC_011280:TCONS_00023956:chr15:+:65:76	chr15	+	62682860	62682872	62682860	62682872	1	62682860,	62682872,
XLOC_011834	XLOC_011834:TCONS_00024522:chr16:+:45:197	chr16	+	89557778	89564630	89557778	89564630	2	89557778,89564493,	89557794,89564630,
XLOC_012097	XLOC_012097:TCONS_00025824:chr17:+:388:759	chr17	+	7308581	7310957	7308581	7310957	2	7308581,7310933,	7308929,7310957,
XLOC_012097	XLOC_012097:TCONS_00025824:chr17:+:1192:1227	chr17	+	7311389	7311425	7311389	7311425	1	7311389,	7311425,
XLOC_012743	XLOC_012743:TCONS_00026394:chr18:-:376:480	chr18	-	2510295	2510400	2510295	2510400	1	2510295,	2510400,
XLOC_012975	XLOC_012975:TCONS_00027488:chr19:+:26:106	chr19	+	13227719	13228858	13227719	13228858	2	13227719,13228807,	13227749,13228858,
XLOC_014386	XLOC_014386:TCONS_00029913:chr22:-:231:431	chr22	-	42062756	42062957	42062756	42062957	1	42062756,	42062957,
XLOC_014510	XLOC_014510:TCONS_00030029:chrUn_gl000223:+:407:571	chrUn_gl000223	+	160540	163303	160540	163303	2	160540,163153,	160555,163303,
XLOC_014512	XLOC_014512:TCONS_00030032:chr7_gl000195_random:+:69:113	chr7_gl000195_random	+	138035	138080	138035	138080	1	138035,	138080,
XLOC_014512	XLOC_014512:TCONS_00030032:chr7_gl000195_random:+:171:269	chr7_gl000195_random	+	138137	140509	138137	140509	2	138137,140413,	138140,140509,
XLOC_014512	XLOC_014512:TCONS_00030032:chr7_gl000195_random:+:432:503	chr7_gl000195_random	+	140860	140932	140860	140932	1	140860,	140932,
XLOC_l2_002351	XLOC_l2_002351:TCONS_l2_00004562:chr11:+:150:188	chr11	+	65222980	65223019	65222980	65223019	1	65222980,	65223019,
XLOC_l2_002433	XLOC_l2_002433:TCONS_l2_00004704:chr11:+:95:184	chr11	+	88071199	88106469	88071199	88106469	2	88071199,88106404,	88071224,88106469,
XLOC_l2_006648	XLOC_l2_006648:TCONS_l2_00012390:chr19:+:239:622	chr19	+	20975380	20981343	20975380	20981343	3	20975380,20976588,20981119,	20975444,20976684,20981343,
XLOC_l2_007456	XLOC_l2_007456:TCONS_l2_00013854:chr2:+:234:308	chr2	+	102600176	102600251	102600176	102600251	1	102600176,	102600251,
XLOC_l2_007456	XLOC_l2_007456:TCONS_l2_00013854:chr2:+:358:417	chr2	+	102601062	102601122	102601062	102601122	1	102601062,	102601122,
XLOC_l2_007567	XLOC_l2_007567:TCONS_l2_00013998:chr2:+:38:67	chr2	+	132442301	132442331	132442301	132442331	1	132442301,	132442331,
XLOC_l2_007567	XLOC_l2_007567:TCONS_l2_00015489:chr2:+:1323:1490	chr2	+	132443910	132445802	132443910	132445802	2	132443910,132445738,	132444014,132445802,
XLOC_l2_015224	XLOC_l2_015224:TCONS_l2_00029386:chr9:-:6402:6476	chr9	-	70631812	70631887	70631812	70631887	1	70631812,	70631887,
XLOC_l2_015980	XLOC_l2_015980:TCONS_l2_00031076:chr6_cox_hap2:+:1857:2195	chr6_cox_hap2	+	1409642	1410868	1409642	1410868	5	1409642,1409913,1410477,1410646,1410863,	1409784,1410030,1410504,1410694,1410868,

## Sheet: psuedogene
ENSG00000255624.1	ENSG00000255624.1:ENST00000368895.2:chr10:+:921:1157	chr10	+	124648064	124657370	124648064	124657370	2	124648064,124657308,	124648239,124657370,
ENSG00000229927.2	ENSG00000229927.2:ENST00000448647.2:chr10:+:0:170	chr10	+	46914150	46914321	46914150	46914321	1	46914150,	46914321,
ENSG00000197149.4	ENSG00000197149.4:ENST00000443932.2:chr11:+:291:881	chr11	+	17250107	17250698	17250107	17250698	1	17250107,	17250698,
ENSG00000223756.2	ENSG00000223756.2:ENST00000526284.1:chr11:+:59:523	chr11	+	3402266	3418600	3402266	3418600	4	3402266,3404691,3405396,3418346,	3402274,3404776,3405514,3418600,
ENSG00000223756.2	ENSG00000223756.2:ENST00000526488.1:chr11:+:121:456	chr11	+	3405432	3417052	3405432	3417052	4	3405432,3406128,3414315,3416942,	3405514,3406198,3414389,3417052,
ENSG00000160172.6	ENSG00000160172.6:ENST00000529253.1:chr11:-:21:416	chr11	-	67560677	67572784	67560677	67572784	4	67560677,67564154,67570472,67572688,	67560764,67564304,67570535,67572784,
ENSG00000258244.1	ENSG00000258244.1:ENST00000550242.1:chr12:+:414:503	chr12	+	115026412	115026502	115026412	115026502	1	115026412,	115026502,
ENSG00000234498.2	ENSG00000234498.2:ENST00000424500.1:chr12:+:0:611	chr12	+	13028432	13029044	13028432	13029044	1	13028432,	13029044,
ENSG00000183935.3	ENSG00000183935.3:ENST00000331998.1:chr12:+:963:1628	chr12	+	13154432	13155177	13154432	13155177	2	13154432,13154763,	13154684,13155177,
ENSG00000256663.1	ENSG00000256663.1:ENST00000540175.1:chr12:+:324:1421	chr12	+	20704847	20705945	20704847	20705945	1	20704847,	20705945,
ENSG00000257907.2	ENSG00000257907.2:ENST00000547505.2:chr12:+:1113:1274	chr12	+	44054742	44054904	44054742	44054904	1	44054742,	44054904,
ENSG00000257576.1	ENSG00000257576.1:ENST00000547203.1:chr12:+:0:1346	chr12	+	56904785	56906132	56904785	56906132	1	56904785,	56906132,
ENSG00000255642.1	ENSG00000255642.1:ENST00000539977.1:chr12:+:0:218	chr12	+	64215800	64216019	64215800	64216019	1	64215800,	64216019,
ENSG00000240370.2	ENSG00000240370.2:ENST00000412023.1:chr12:+:300:488	chr12	+	6982852	6991455	6982852	6991455	2	6982852,6991359,	6982945,6991455,
ENSG00000240370.2	ENSG00000240370.2:ENST00000451612.1:chr12:+:210:500	chr12	+	6982852	6993065	6982852	6993065	2	6982852,6992867,	6982945,6993065,
ENSG00000248593.3	ENSG00000248593.3:ENST00000602547.1:chr12:+:172:702	chr12	+	6994017	6994548	6994017	6994548	1	6994017,	6994548,
ENSG00000111788.9	ENSG00000111788.9:ENST00000539757.1:chr12:+:265:2160	chr12	+	9440879	9462943	9440879	9462943	19	9440879,9446257,9447027,9447412,9450376,9451016,9451375,9451855,9453689,9454823,9455218,9456570,9456735,9458314,9458610,9458832,9459797,9462543,9462934,	9440945,9446506,9447114,9447570,9450422,9451124,9451463,9452064,9453842,9454870,9455298,9456615,9456803,9458353,9458719,9458964,9459910,9462633,9462943,
ENSG00000256594.3	ENSG00000256594.3:ENST00000575094.1:chr12:+:752:817	chr12	+	9801394	9801460	9801394	9801460	1	9801394,	9801460,
ENSG00000256594.3	ENSG00000256594.3:ENST00000537668.1:chr12:+:19:240	chr12	+	9806297	9808500	9806297	9808500	3	9806297,9807816,9808468,	9806404,9807899,9808500,
ENSG00000256594.3	ENSG00000256594.3:ENST00000575094.1:chr12:+:1103:1270	chr12	+	9808558	9809667	9808558	9809667	2	9808558,9809516,	9808575,9809667,
ENSG00000256594.3	ENSG00000256594.3:ENST00000545363.2:chr12:+:558:788	chr12	+	9809213	9809667	9809213	9809667	2	9809213,9809516,	9809293,9809667,
ENSG00000248594.2	ENSG00000248594.2:ENST00000507132.2:chr12:-:202:312	chr12	-	112278049	112278160	112278049	112278160	1	112278049,	112278160,
ENSG00000134297.6	ENSG00000134297.6:ENST00000256692.5:chr12:-:104:280	chr12	-	45568404	45570179	45568404	45570179	2	45568404,45570023,	45568425,45570179,
ENSG00000134297.6	ENSG00000134297.6:ENST00000550498.1:chr12:-:124:297	chr12	-	45570005	45570179	45570005	45570179	1	45570005,	45570179,
ENSG00000241749.3	ENSG00000241749.3:ENST00000489520.2:chr12:-:602:688	chr12	-	66152254	66152341	66152254	66152341	1	66152254,	66152341,
ENSG00000241749.3	ENSG00000241749.3:ENST00000489520.2:chr12:-:421:1014	chr12	-	66151928	66152522	66151928	66152522	1	66151928,	66152522,
ENSG00000241749.3	ENSG00000241749.3:ENST00000489520.2:chr12:-:350:427	chr12	-	66152515	66152593	66152515	66152593	1	66152515,	66152593,
ENSG00000241749.3	ENSG00000241749.3:ENST00000489520.2:chr12:-:165:293	chr12	-	66152649	66152778	66152649	66152778	1	66152649,	66152778,
ENSG00000241749.3	ENSG00000241749.3:ENST00000489520.2:chr12:-:141:149	chr12	-	66152793	66152802	66152793	66152802	1	66152793,	66152802,
ENSG00000241749.3	ENSG00000241749.3:ENST00000489520.2:chr12:-:116:124	chr12	-	66220629	66220638	66220629	66220638	1	66220629,	66220638,
ENSG00000214826.4	ENSG00000214826.4:ENST00000290818.6:chr12:-:338:2971	chr12	-	9571265	9596187	9571265	9596187	26	9571265,9571370,9571707,9572084,9572576,9572782,9573110,9573983,9574413,9577123,9578066,9578311,9578677,9580228,9580416,9581727,9582155,9583183,9584961,9585564,9585903,9586690,9589542,9589998,9590606,9596130,	9571295,9571525,9571786,9572169,9572677,9572851,9573260,9574087,9574486,9577236,9578198,9578420,9578716,9580296,9580461,9581807,9582202,9583336,9585170,9585652,9586011,9586736,9589700,9590085,9590855,9596187,
ENSG00000224892.2	ENSG00000224892.2:ENST00000427198.2:chr13:+:544:720	chr13	+	52035204	52035381	52035204	52035381	1	52035204,	52035381,
ENSG00000243406.2	ENSG00000243406.2:ENST00000423686.1:chr13:-:44:235	chr13	-	52763969	52768469	52763969	52768469	2	52763969,52768357,	52764049,52768469,
ENSG00000243406.2	ENSG00000243406.2:ENST00000606974.1:chr13:-:46:180	chr13	-	52760944	52768509	52760944	52768509	2	52760944,52768388,	52760958,52768509,
ENSG00000241494.1	ENSG00000241494.1:ENST00000472981.1:chr14:+:330:437	chr14	+	102144609	102144717	102144609	102144717	1	102144609,	102144717,
ENSG00000185596.12	ENSG00000185596.12:ENST00000559884.1:chr15:+:59:265	chr15	+	102506292	102506797	102506292	102506797	2	102506292,102506724,	102506426,102506797,
ENSG00000185596.12	ENSG00000185596.12:ENST00000354296.5:chr15:+:44:220	chr15	+	102506292	102512068	102506292	102512068	2	102506292,102512025,	102506426,102512068,
ENSG00000185596.12	ENSG00000185596.12:ENST00000558686.1:chr15:+:175:312	chr15	+	102506292	102512802	102506292	102512802	2	102506292,102512798,	102506426,102512802,
ENSG00000259098.1	ENSG00000259098.1:ENST00000553429.1:chr15:+:321:704	chr15	+	22546409	22546793	22546409	22546793	1	22546409,	22546793,
ENSG00000179362.10	ENSG00000179362.10:ENST00000313559.5:chr15:+:658:834	chr15	+	45847919	45848096	45847919	45848096	1	45847919,	45848096,
ENSG00000260266.1	ENSG00000260266.1:ENST00000562009.1:chr15:+:447:662	chr15	+	74654071	74654287	74654071	74654287	1	74654071,	74654287,
ENSG00000176700.15	ENSG00000176700.15:ENST00000348993.5:chr15:+:38:151	chr15	+	85174719	85174833	85174719	85174833	1	85174719,	85174833,
ENSG00000176700.15	ENSG00000176700.15:ENST00000530891.3:chr15:+:73:504	chr15	+	85175130	85175562	85175130	85175562	1	85175130,	85175562,
ENSG00000176700.15	ENSG00000176700.15:ENST00000348993.5:chr15:+:449:907	chr15	+	85175130	85180637	85175130	85180637	2	85175130,85180577,	85175529,85180637,
ENSG00000176700.15	ENSG00000176700.15:ENST00000530891.3:chr15:+:279:482	chr15	+	85175336	85175540	85175336	85175540	1	85175336,	85175540,
ENSG00000258590.1	ENSG00000258590.1:ENST00000554452.1:chr15:-:336:593	chr15	-	20874834	20876567	20874834	20876567	2	20874834,20876441,	20874966,20876567,
ENSG00000259479.2	ENSG00000259479.2:ENST00000562107.1:chr15:-:139:447	chr15	-	45119253	45120790	45119253	45120790	2	45119253,45120647,	45119419,45120790,
ENSG00000259479.2	ENSG00000259479.2:ENST00000564140.1:chr15:-:198:488	chr15	-	45119253	45122437	45119253	45122437	3	45119253,45120647,45122434,	45119419,45120769,45122437,
ENSG00000248415.1	ENSG00000248415.1:ENST00000507324.1:chr15:-:735:788	chr15	-	64821081	64821135	64821081	64821135	1	64821081,	64821135,
ENSG00000240821.1	ENSG00000240821.1:ENST00000489563.1:chr15:-:0:503	chr15	-	66671749	66672253	66671749	66672253	1	66671749,	66672253,
ENSG00000238098.4	ENSG00000238098.4:ENST00000469908.1:chr16:+:170:418	chr16	+	2391092	2391341	2391092	2391341	1	2391092,	2391341,
ENSG00000215154.2	ENSG00000215154.2:ENST00000399702.1:chr16:+:122:484	chr16	+	2653472	2660569	2653472	2660569	2	2653472,2660462,	2653728,2660569,
ENSG00000228695.5	ENSG00000228695.5:ENST00000421606.1:chr16:+:997:1797	chr16	+	55810804	55827872	55810804	55827872	8	55810804,55813613,55817510,55819524,55819868,55824456,55827319,55827688,	55810807,55813652,55817651,55819605,55820016,55824588,55827392,55827872,
ENSG00000260549.1	ENSG00000260549.1:ENST00000565768.1:chr16:+:87:164	chr16	+	56651474	56652140	56651474	56652140	2	56651474,56652090,	56651502,56652140,
ENSG00000260549.1	ENSG00000260549.1:ENST00000565768.1:chr16:+:201:272	chr16	+	56652520	56652592	56652520	56652592	1	56652520,	56652592,
ENSG00000260549.1	ENSG00000260549.1:ENST00000565768.1:chr16:+:272:301	chr16	+	56652591	56652621	56652591	56652621	1	56652591,	56652621,
ENSG00000260549.1	ENSG00000260549.1:ENST00000565768.1:chr16:+:322:348	chr16	+	56652641	56652668	56652641	56652668	1	56652641,	56652668,
ENSG00000260549.1	ENSG00000260549.1:ENST00000565768.1:chr16:+:379:384	chr16	+	56652698	56652704	56652698	56652704	1	56652698,	56652704,
ENSG00000205361.4	ENSG00000205361.4:ENST00000463480.2:chr16:+:20:169	chr16	+	56677636	56678677	56677636	56678677	3	56677636,56678022,56678621,	56677664,56678088,56678677,
ENSG00000223959.4	ENSG00000223959.4:ENST00000429663.1:chr16:+:45:263	chr16	+	90039038	90046664	90039038	90046664	3	90039038,90045217,90046649,	90039173,90045286,90046664,
ENSG00000223959.4	ENSG00000223959.4:ENST00000437774.1:chr16:+:82:198	chr16	+	90039106	90044062	90039106	90044062	2	90039106,90044012,	90039173,90044062,
ENSG00000180747.11	ENSG00000180747.11:ENST00000522841.2:chr16:-:79:651	chr16	-	21495821	21531686	21495821	21531686	2	21495821,21531148,	21495856,21531686,
ENSG00000183604.10	ENSG00000183604.10:ENST00000411546.3:chr16:-:2020:2196	chr16	-	30296508	30296685	30296508	30296685	1	30296508,	30296685,
ENSG00000214331.4	ENSG00000214331.4:ENST00000429810.2:chr16:-:211:1086	chr16	-	74378868	74394754	74378868	74394754	7	74378868,74382764,74384514,74385937,74386194,74387674,74394530,	74378869,74382913,74384636,74386101,74386276,74387808,74394754,
ENSG00000250462.4	ENSG00000250462.4:ENST00000417404.1:chr17:+:1047:1544	chr17	+	28960186	28961287	28960186	28961287	2	28960186,28961011,	28960408,28961287,
ENSG00000266865.2	ENSG00000266865.2:ENST00000580190.1:chr17:+:33:422	chr17	+	29335655	29372468	29335655	29372468	4	29335655,29348927,29351394,29372427,	29335821,29349060,29351444,29372468,
ENSG00000266865.2	ENSG00000266865.2:ENST00000579692.1:chr17:+:294:443	chr17	+	29335808	29349064	29335808	29349064	2	29335808,29348927,	29335821,29349064,
ENSG00000266865.2	ENSG00000266865.2:ENST00000578883.1:chr17:+:1:117	chr17	+	29351359	29359475	29351359	29359475	2	29351359,29359443,	29351444,29359475,
ENSG00000198496.6	ENSG00000198496.6:ENST00000356906.3:chr17:+:29:112	chr17	+	41277685	41277769	41277685	41277769	1	41277685,	41277769,
ENSG00000198496.6	ENSG00000198496.6:ENST00000356906.3:chr17:+:112:147	chr17	+	41277768	41283241	41277768	41283241	2	41277768,41283224,	41277787,41283241,
ENSG00000198496.6	ENSG00000198496.6:ENST00000356906.3:chr17:+:177:260	chr17	+	41283270	41290740	41283270	41290740	2	41283270,41290673,	41283287,41290740,
ENSG00000237854.3	ENSG00000237854.3:ENST00000435469.2:chr17:+:50:91	chr17	+	66099133	66099175	66099133	66099175	1	66099133,	66099175,
ENSG00000237854.3	ENSG00000237854.3:ENST00000435469.2:chr17:+:112:201	chr17	+	66099195	66110648	66099195	66110648	2	66099195,66110562,	66099199,66110648,
ENSG00000237854.3	ENSG00000237854.3:ENST00000435469.2:chr17:+:170:361	chr17	+	66110616	66111343	66110616	66111343	2	66110616,66111201,	66110666,66111343,
ENSG00000226145.3	ENSG00000226145.3:ENST00000425692.2:chr17:-:39:623	chr17	-	16723396	16725767	16723396	16725767	3	16723396,16723972,16725284,	16723413,16724057,16725767,
ENSG00000240445.3	ENSG00000240445.3:ENST00000395675.4:chr17:-:175:564	chr17	-	18575621	18576011	18575621	18576011	1	18575621,	18576011,
ENSG00000228782.3	ENSG00000228782.3:ENST00000425159.3:chr17:-:344:373	chr17	-	45567564	45567594	45567564	45567594	1	45567564,	45567594,
ENSG00000228782.3	ENSG00000228782.3:ENST00000425159.3:chr17:-:33:347	chr17	-	45567590	45569825	45567590	45569825	3	45567590,45568380,45569759,	45567661,45568558,45569825,
ENSG00000214176.5	ENSG00000214176.5:ENST00000578036.1:chr17:-:272:907	chr17	-	62801157	62820891	62801157	62820891	4	62801157,62817884,62818371,62820742,	62801218,62818170,62818511,62820891,
ENSG00000214176.5	ENSG00000214176.5:ENST00000440036.2:chr17:-:130:645	chr17	-	62801157	62825307	62801157	62825307	4	62801157,62817884,62818371,62825278,	62801218,62818170,62818511,62825307,
ENSG00000214174.4	ENSG00000214174.4:ENST00000430983.1:chr17:-:1014:1373	chr17	-	62968961	62969635	62968961	62969635	2	62968961,62969359,	62969045,62969635,
ENSG00000257267.1	ENSG00000257267.1:ENST00000399070.3:chr18:+:57:128	chr18	+	32870302	32870992	32870302	32870992	2	32870302,32870973,	32870355,32870992,
ENSG00000257267.1	ENSG00000257267.1:ENST00000540308.1:chr18:+:3:62	chr18	+	32870302	32885946	32870302	32885946	2	32870302,32885939,	32870355,32885946,
ENSG00000257267.1	ENSG00000257267.1:ENST00000399070.3:chr18:+:158:265	chr18	+	32871021	32871129	32871021	32871129	1	32871021,	32871129,
ENSG00000257267.1	ENSG00000257267.1:ENST00000399070.3:chr18:+:284:481	chr18	+	32871147	32886088	32871147	32886088	2	32871147,32885939,	32871196,32886088,
ENSG00000257267.1	ENSG00000257267.1:ENST00000399070.3:chr18:+:533:796	chr18	+	32886139	32886403	32886139	32886403	1	32886139,	32886403,
ENSG00000267500.1	ENSG00000267500.1:ENST00000431363.1:chr19:+:723:1334	chr19	+	11763008	11763620	11763008	11763620	1	11763008,	11763620,
ENSG00000224864.3	ENSG00000224864.3:ENST00000434475.2:chr19:+:192:482	chr19	+	20236002	20236293	20236002	20236293	1	20236002,	20236293,
ENSG00000269388.1	ENSG00000269388.1:ENST00000596210.1:chr19:+:449:808	chr19	+	52104480	52104840	52104480	52104840	1	52104480,	52104840,
ENSG00000240225.6	ENSG00000240225.6:ENST00000467807.1:chr19:+:348:860	chr19	+	56884618	56888549	56884618	56888549	4	56884618,56884899,56886054,56888235,	56884652,56884992,56886126,56888549,
ENSG00000213753.6	ENSG00000213753.6:ENST00000473164.1:chr19:+:19:60	chr19	+	59086841	59086883	59086841	59086883	1	59086841,	59086883,
ENSG00000213753.6	ENSG00000213753.6:ENST00000493504.1:chr19:+:66:152	chr19	+	59086892	59092635	59086892	59092635	2	59086892,59092611,	59086955,59092635,
ENSG00000213753.6	ENSG00000213753.6:ENST00000479047.1:chr19:+:175:330	chr19	+	59092619	59092775	59092619	59092775	1	59092619,	59092775,
ENSG00000213753.6	ENSG00000213753.6:ENST00000493504.1:chr19:+:512:652	chr19	+	59092994	59093135	59092994	59093135	1	59092994,	59093135,
ENSG00000213753.6	ENSG00000213753.6:ENST00000493504.1:chr19:+:766:909	chr19	+	59093248	59093392	59093248	59093392	1	59093248,	59093392,
ENSG00000213753.6	ENSG00000213753.6:ENST00000493504.1:chr19:+:906:1493	chr19	+	59093388	59093976	59093388	59093976	1	59093388,	59093976,
ENSG00000231205.7	ENSG00000231205.7:ENST00000502675.1:chr19:-:11:157	chr19	-	20607604	20607751	20607604	20607751	1	20607604,	20607751,
ENSG00000269374.1	ENSG00000269374.1:ENST00000600255.1:chr19:-:138:359	chr19	-	42989506	42989728	42989506	42989728	1	42989506,	42989728,
ENSG00000243829.1	ENSG00000243829.1:ENST00000498085.1:chr19:-:177:518	chr19	-	50222819	50223161	50222819	50223161	1	50222819,	50223161,
ENSG00000242779.2	ENSG00000242779.2:ENST00000270443.4:chr19:-:27:104	chr19	-	53490039	53496750	53490039	53496750	2	53490039,53496732,	53490099,53496750,
ENSG00000223345.3	ENSG00000223345.3:ENST00000412169.1:chr1:+:0:128	chr1	+	120906042	120906171	120906042	120906171	1	120906042,	120906171,
ENSG00000231767.2	ENSG00000231767.2:ENST00000497083.2:chr1:+:393:470	chr1	+	192685705	192685783	192685705	192685783	1	192685705,	192685783,
ENSG00000242757.1	ENSG00000242757.1:ENST00000447187.1:chr1:+:106:321	chr1	+	227618332	227618548	227618332	227618548	1	227618332,	227618548,
ENSG00000243781.1	ENSG00000243781.1:ENST00000450208.1:chr1:+:242:724	chr1	+	238090372	238090855	238090372	238090855	1	238090372,	238090855,
ENSG00000241547.1	ENSG00000241547.1:ENST00000486001.1:chr1:+:21:467	chr1	+	27651840	27652287	27651840	27652287	1	27651840,	27652287,
ENSG00000236872.1	ENSG00000236872.1:ENST00000435399.1:chr1:+:183:308	chr1	+	45880874	45881000	45880874	45881000	1	45880874,	45881000,
ENSG00000232022.2	ENSG00000232022.2:ENST00000429784.2:chr1:+:507:722	chr1	+	46910923	46911139	46910923	46911139	1	46910923,	46911139,
ENSG00000203819.6	ENSG00000203819.6:ENST00000498492.2:chr1:-:331:378	chr1	-	149821960	149822008	149821960	149822008	1	149821960,	149822008,
ENSG00000160766.10	ENSG00000160766.10:ENST00000473223.1:chr1:-:968:1960	chr1	-	155184460	155187135	155184460	155187135	7	155184460,155184844,155185353,155185552,155186174,155186647,155187030,	155184475,155185191,155185442,155185578,155186412,155186820,155187135,
ENSG00000160766.10	ENSG00000160766.10:ENST00000313929.7:chr1:-:262:1131	chr1	-	155184902	155187803	155184902	155187803	6	155184902,155185353,155186174,155186647,155187030,155187754,	155184953,155185578,155186412,155186820,155187164,155187803,
ENSG00000160766.10	ENSG00000160766.10:ENST00000368374.1:chr1:-:250:1329	chr1	-	155184158	155194669	155184158	155194669	10	155184158,155184358,155184844,155185353,155185552,155186174,155186647,155187030,155187754,155194667,	155184264,155184475,155184953,155185442,155185578,155186412,155186820,155187164,155187840,155194669,
ENSG00000213075.7	ENSG00000213075.7:ENST00000426558.1:chr1:-:400:414	chr1	-	161654627	161654642	161654627	161654642	1	161654627,	161654642,
ENSG00000214796.4	ENSG00000214796.4:ENST00000443294.1:chr1:-:110:430	chr1	-	202822359	202830626	202822359	202830626	3	202822359,202828009,202830575,	202822408,202828230,202830626,
ENSG00000227671.3	ENSG00000227671.3:ENST00000421406.1:chr1:-:171:1337	chr1	-	247353279	247363402	247353279	247363402	3	247353279,247362662,247363369,	247354314,247362761,247363402,
ENSG00000227671.3	ENSG00000227671.3:ENST00000606173.1:chr1:-:44:130	chr1	-	247374027	247374114	247374027	247374114	1	247374027,	247374114,
ENSG00000101898.5	ENSG00000101898.5:ENST00000394552.2:chr20:+:0:545	chr20	+	30135306	30135852	30135306	30135852	1	30135306,	30135852,
ENSG00000235217.5	ENSG00000235217.5:ENST00000400643.2:chr20:-:105:1172	chr20	-	30777004	30778072	30777004	30778072	1	30777004,	30778072,
ENSG00000272779.1	ENSG00000272779.1:ENST00000413293.1:chr22:+:75:86	chr22	+	22658308	22658320	22658308	22658320	1	22658308,	22658320,
ENSG00000100058.8	ENSG00000100058.8:ENST00000382734.5:chr22:+:113:130	chr22	+	25844184	25844202	25844184	25844202	1	25844184,	25844202,
ENSG00000100058.8	ENSG00000100058.8:ENST00000354451.2:chr22:+:5:154	chr22	+	25851689	25853257	25851689	25853257	2	25851689,25853225,	25851807,25853257,
ENSG00000100058.8	ENSG00000100058.8:ENST00000354451.2:chr22:+:120:281	chr22	+	25851804	25855398	25851804	25855398	3	25851804,25853225,25855382,	25851807,25853368,25855398,
ENSG00000225720.2	ENSG00000225720.2:ENST00000424436.1:chr22:+:325:582	chr22	+	39488593	39488851	39488593	39488851	1	39488593,	39488851,
ENSG00000184319.11	ENSG00000184319.11:ENST00000463325.1:chr22:+:12:140	chr22	+	51222214	51222343	51222214	51222343	1	51222214,	51222343,
ENSG00000184319.11	ENSG00000184319.11:ENST00000462238.1:chr22:+:51:122	chr22	+	51222235	51223615	51222235	51223615	2	51222235,51223600,	51222292,51223615,
ENSG00000184319.11	ENSG00000184319.11:ENST00000462238.1:chr22:+:173:292	chr22	+	51223665	51237146	51223665	51237146	2	51223665,51237082,	51223721,51237146,
ENSG00000215513.7	ENSG00000215513.7:ENST00000438765.1:chr22:-:19:42	chr22	-	20427792	20427816	20427792	20427816	1	20427792,	20427816,
ENSG00000213857.3	ENSG00000213857.3:ENST00000423293.1:chr22:-:486:800	chr22	-	41470442	41470757	41470442	41470757	1	41470442,	41470757,
ENSG00000182841.8	ENSG00000182841.8:ENST00000357802.2:chr22:-:558:869	chr22	-	42970738	42972547	42970738	42972547	3	42970738,42971936,42972517,	42970824,42972132,42972547,
ENSG00000182841.8	ENSG00000182841.8:ENST00000421116.1:chr22:-:119:466	chr22	-	42973365	42976315	42973365	42976315	3	42973365,42973849,42976222,	42973501,42973968,42976315,
ENSG00000182841.8	ENSG00000182841.8:ENST00000357802.2:chr22:-:37:384	chr22	-	42973091	42978007	42973091	42978007	4	42973091,42973849,42976222,42977934,	42973104,42973968,42976365,42978007,
ENSG00000152117.13	ENSG00000152117.13:ENST00000538598.1:chr2:+:19:222	chr2	+	132250667	132258089	132250667	132258089	3	132250667,132257776,132258078,	132250713,132257923,132258089,
ENSG00000152117.13	ENSG00000152117.13:ENST00000543513.1:chr2:+:35:694	chr2	+	132250683	132266120	132250683	132266120	8	132250683,132256439,132257776,132258078,132258534,132258753,132258930,132266109,	132250713,132256526,132257919,132258154,132258643,132258806,132259081,132266120,
ENSG00000152117.13	ENSG00000152117.13:ENST00000415574.2:chr2:+:373:1083	chr2	+	132254827	132263937	132254827	132263937	8	132254827,132256439,132257776,132258078,132258534,132258753,132258930,132263884,	132254866,132256526,132257919,132258154,132258643,132258806,132259081,132263937,
ENSG00000220804.4	ENSG00000220804.4:ENST00000453598.2:chr2:+:116:634	chr2	+	243037044	243080934	243037044	243080934	5	243037044,243056789,243061115,243064437,243080914,	243037178,243056892,243061208,243064606,243080934,
ENSG00000237887.1	ENSG00000237887.1:ENST00000395315.2:chr2:+:46:69	chr2	+	54756525	54756549	54756525	54756549	1	54756525,	54756549,
ENSG00000240356.2	ENSG00000240356.2:ENST00000416673.2:chr2:-:171:395	chr2	-	114369760	114384446	114369760	114384446	3	114369760,114383185,114384406,	114369824,114383306,114384446,
ENSG00000240356.2	ENSG00000240356.2:ENST00000391616.3:chr2:-:45:170	chr2	-	114383188	114384622	114383188	114384622	2	114383188,114384614,	114383306,114384622,
ENSG00000213917.2	ENSG00000213917.2:ENST00000396820.2:chr2:-:633:671	chr2	-	215145504	215145543	215145504	215145543	1	215145504,	215145543,
ENSG00000224287.2	ENSG00000224287.2:ENST00000438684.1:chr2:-:0:1343	chr2	-	234774770	234777090	234774770	234777090	2	234774770,234776972,	234775996,234777090,
ENSG00000235847.2	ENSG00000235847.2:ENST00000398295.3:chr2:-:299:538	chr2	-	85004808	85005048	85004808	85005048	1	85004808,	85005048,
ENSG00000143429.5	ENSG00000143429.5:ENST00000609777.1:chr2:-:247:408	chr2	-	91805970	91806132	91805970	91806132	1	91805970,	91806132,
ENSG00000143429.5	ENSG00000143429.5:ENST00000609777.1:chr2:-:118:219	chr2	-	91806159	91843474	91806159	91843474	2	91806159,91843393,	91806180,91843474,
ENSG00000143429.5	ENSG00000143429.5:ENST00000608501.1:chr2:-:75:299	chr2	-	91816835	91843474	91816835	91843474	2	91816835,91843393,	91816979,91843474,
ENSG00000143429.5	ENSG00000143429.5:ENST00000271699.3:chr2:-:95:307	chr2	-	91825005	91843474	91825005	91843474	3	91825005,91842945,91843393,	91825059,91843023,91843474,
ENSG00000180385.4	ENSG00000180385.4:ENST00000440568.1:chr3:+:84:179	chr3	+	10029532	10044403	10029532	10044403	3	10029532,10030395,10044400,	10029589,10030431,10044403,
ENSG00000180385.4	ENSG00000180385.4:ENST00000326237.3:chr3:+:404:931	chr3	+	10044450	10044978	10044450	10044978	1	10044450,	10044978,
ENSG00000171084.11	ENSG00000171084.11:ENST00000467239.1:chr3:+:249:494	chr3	+	125643813	125647438	125643813	125647438	2	125643813,125647337,	125643958,125647438,
ENSG00000240024.1	ENSG00000240024.1:ENST00000471496.1:chr3:+:15:374	chr3	+	183165410	183170082	183165410	183170082	2	183165410,183169865,	183165553,183170082,
ENSG00000240024.1	ENSG00000240024.1:ENST00000468380.1:chr3:+:29:118	chr3	+	183165467	183165557	183165467	183165557	1	183165467,	183165557,
ENSG00000171658.4	ENSG00000171658.4:ENST00000306399.3:chr3:+:0:122	chr3	+	185677827	185686350	185677827	185686350	2	185677827,185686267,	185677867,185686350,
ENSG00000171658.4	ENSG00000171658.4:ENST00000423298.1:chr3:+:96:248	chr3	+	185677827	185689516	185677827	185689516	2	185677827,185689403,	185677867,185689516,
ENSG00000132967.9	ENSG00000132967.9:ENST00000255320.6:chr3:+:186:641	chr3	+	22423495	22423951	22423495	22423951	1	22423495,	22423951,
ENSG00000213846.3	ENSG00000213846.3:ENST00000368528.3:chr3:+:205:744	chr3	+	27674671	27675211	27674671	27675211	1	27674671,	27675211,
ENSG00000186162.6	ENSG00000186162.6:ENST00000335507.5:chr3:-:170:316	chr3	-	10067727	10067874	10067727	10067874	1	10067727,	10067874,
ENSG00000186162.6	ENSG00000186162.6:ENST00000335507.5:chr3:-:13:60	chr3	-	10067983	10068031	10067983	10068031	1	10067983,	10068031,
ENSG00000251474.2	ENSG00000251474.2:ENST00000510078.1:chr3:-:580:855	chr3	-	129112485	129115182	129112485	129115182	2	129112485,129115059,	129112638,129115182,
ENSG00000251474.2	ENSG00000251474.2:ENST00000394491.3:chr3:-:403:651	chr3	-	129112485	129115978	129112485	129115978	2	129112485,129115882,	129112638,129115978,
ENSG00000251474.2	ENSG00000251474.2:ENST00000506593.1:chr3:-:177:344	chr3	-	129115191	129115978	129115191	129115978	2	129115191,129115882,	129115263,129115978,
ENSG00000234851.3	ENSG00000234851.3:ENST00000438478.2:chr3:-:166:483	chr3	-	161146914	161147232	161146914	161147232	1	161146914,	161147232,
ENSG00000214135.4	ENSG00000214135.4:ENST00000414207.1:chr3:-:696:1040	chr3	-	197342534	197349066	197342534	197349066	4	197342534,197346610,197348574,197349057,	197342556,197346759,197348739,197349066,
ENSG00000214135.4	ENSG00000214135.4:ENST00000440535.1:chr3:-:329:535	chr3	-	197342534	197350126	197342534	197350126	3	197342534,197346610,197350090,	197342556,197346759,197350126,
ENSG00000214135.4	ENSG00000214135.4:ENST00000437008.1:chr3:-:475:549	chr3	-	197348713	197350139	197348713	197350139	2	197348713,197350090,	197348739,197350139,
ENSG00000214135.4	ENSG00000214135.4:ENST00000418868.1:chr3:-:115:234	chr3	-	197350231	197354662	197350231	197354662	3	197350231,197350982,197354650,	197350253,197351068,197354662,
ENSG00000176354.2	ENSG00000176354.2:ENST00000313442.2:chr3:-:35:313	chr3	-	37285372	37285651	37285372	37285651	1	37285372,	37285651,
ENSG00000244026.2	ENSG00000244026.2:ENST00000459803.1:chr3:-:337:1029	chr3	-	75472111	75478328	75472111	75478328	5	75472111,75475600,75476577,75476925,75478286,	75472212,75475750,75476843,75477059,75478328,
ENSG00000244026.2	ENSG00000244026.2:ENST00000459803.1:chr3:-:93:137	chr3	-	75482014	75484106	75482014	75484106	2	75482014,75484068,	75482021,75484106,
ENSG00000244026.2	ENSG00000244026.2:ENST00000497543.1:chr3:-:13:321	chr3	-	75483877	75484186	75483877	75484186	1	75483877,	75484186,
ENSG00000245958.2	ENSG00000245958.2:ENST00000508519.1:chr4:+:206:316	chr4	+	120376199	120381359	120376199	120381359	2	120376199,120381337,	120376288,120381359,
ENSG00000205100.2	ENSG00000205100.2:ENST00000378770.1:chr4:+:205:1254	chr4	+	190394505	190396344	190394505	190396344	4	190394505,190395051,190395616,190395956,	190394631,190395328,190395875,190396344,
ENSG00000241411.1	ENSG00000241411.1:ENST00000459634.1:chr4:-:465:572	chr4	-	135873471	135873579	135873471	135873579	1	135873471,	135873579,
ENSG00000213406.3	ENSG00000213406.3:ENST00000505539.1:chr4:-:84:281	chr4	-	154229587	154229785	154229587	154229785	1	154229587,	154229785,
ENSG00000251669.1	ENSG00000251669.1:ENST00000313946.8:chr4:-:253:378	chr4	-	3949723	3949849	3949723	3949849	1	3949723,	3949849,
ENSG00000218227.3	ENSG00000218227.3:ENST00000477964.1:chr5:+:6:590	chr5	+	177482610	177483195	177482610	177483195	1	177482610,	177483195,
ENSG00000183666.12	ENSG00000183666.12:ENST00000508973.1:chr5:+:47:253	chr5	+	21459668	21473497	21459668	21473497	4	21459668,21459786,21461891,21473465,	21459693,21459852,21461975,21473497,
ENSG00000246596.2	ENSG00000246596.2:ENST00000499314.2:chr5:-:10:234	chr5	-	177054550	177058526	177054550	177058526	2	177054550,177058366,	177054615,177058526,
ENSG00000246596.2	ENSG00000246596.2:ENST00000515045.1:chr5:-:60:254	chr5	-	177059673	177099150	177059673	177099150	2	177059673,177099021,	177059739,177099150,
ENSG00000184188.6	ENSG00000184188.6:ENST00000507366.1:chr5:-:468:1100	chr5	-	79595496	79596129	79595496	79596129	1	79595496,	79596129,
ENSG00000220848.4	ENSG00000220848.4:ENST00000482817.1:chr6:+:250:459	chr6	+	149915469	149915679	149915469	149915679	1	149915469,	149915679,
ENSG00000214975.4	ENSG00000214975.4:ENST00000414949.2:chr6:+:15:119	chr6	+	24976661	24976831	24976661	24976831	2	24976661,24976781,	24976716,24976831,
ENSG00000124549.10	ENSG00000124549.10:ENST00000465856.1:chr6:+:264:875	chr6	+	26422346	26423693	26422346	26423693	2	26422346,26423160,	26422425,26423693,
ENSG00000124549.10	ENSG00000124549.10:ENST00000466808.2:chr6:+:334:561	chr6	+	26423415	26423764	26423415	26423764	2	26423415,26423626,	26423505,26423764,
ENSG00000168405.10	ENSG00000168405.10:ENST00000436589.2:chr6:-:126:188	chr6	-	25115321	25137903	25115321	25137903	2	25115321,25137847,	25115328,25137903,
ENSG00000168405.10	ENSG00000168405.10:ENST00000462823.1:chr6:-:248:466	chr6	-	25128078	25138309	25128078	25138309	3	25128078,25137847,25138301,	25128085,25138051,25138309,
ENSG00000273340.1	ENSG00000273340.1:ENST00000510438.1:chr6:-:6:488	chr6	-	29712847	29716740	29712847	29716740	3	29712847,29713249,29716676,	29713011,29713504,29716740,
ENSG00000271361.1	ENSG00000271361.1:ENST00000604204.1:chr6:-:55:177	chr6	-	3023828	3023951	3023828	3023951	1	3023828,	3023951,
ENSG00000272601.1	ENSG00000272601.1:ENST00000478818.1:chr7:+:66:449	chr7	+	128106682	128109225	128106682	128109225	2	128106682,128108898,	128106739,128109225,
ENSG00000230359.3	ENSG00000230359.3:ENST00000453581.1:chr7:+:0:692	chr7	+	128696072	128696824	128696072	128696824	2	128696072,128696409,	128696350,128696824,
ENSG00000219451.3	ENSG00000219451.3:ENST00000405810.2:chr7:+:33:248	chr7	+	20866977	20867193	20866977	20867193	1	20866977,	20867193,
ENSG00000226421.1	ENSG00000226421.1:ENST00000435239.1:chr7:+:390:464	chr7	+	32511514	32511589	32511514	32511589	1	32511514,	32511589,
ENSG00000196204.7	ENSG00000196204.7:ENST00000360944.4:chr7:+:10:21	chr7	+	5013722	5013734	5013722	5013734	1	5013722,	5013734,
ENSG00000196204.7	ENSG00000196204.7:ENST00000360944.4:chr7:+:149:277	chr7	+	5016000	5023363	5016000	5023363	2	5016000,5023301,	5016067,5023363,
ENSG00000196204.7	ENSG00000196204.7:ENST00000404404.1:chr7:+:447:722	chr7	+	5024574	5028772	5024574	5028772	3	5024574,5026197,5028693,	5024706,5026262,5028772,
ENSG00000196204.7	ENSG00000196204.7:ENST00000403969.1:chr7:+:385:630	chr7	+	5024574	5036354	5024574	5036354	2	5024574,5036240,	5024706,5036354,
ENSG00000196204.7	ENSG00000196204.7:ENST00000493407.1:chr7:+:495:641	chr7	+	5024622	5026205	5024622	5026205	2	5024622,5026197,	5024761,5026205,
ENSG00000196204.7	ENSG00000196204.7:ENST00000405396.2:chr7:+:161:352	chr7	+	5024622	5028772	5024622	5028772	2	5024622,5028664,	5024706,5028772,
ENSG00000196204.7	ENSG00000196204.7:ENST00000404006.1:chr7:+:446:622	chr7	+	5024622	5028786	5024622	5028786	2	5024622,5028693,	5024706,5028786,
ENSG00000228409.1	ENSG00000228409.1:ENST00000442266.1:chr7:+:16:210	chr7	+	65216146	65217226	65216146	65217226	2	65216146,65217150,	65216265,65217226,
ENSG00000228409.1	ENSG00000228409.1:ENST00000443108.1:chr7:+:17:154	chr7	+	65216146	65220785	65216146	65220785	2	65216146,65220766,	65216265,65220785,
ENSG00000106610.10	ENSG00000106610.10:ENST00000416602.2:chr7:+:47:148	chr7	+	66767654	66767756	66767654	66767756	1	66767654,	66767756,
ENSG00000106610.10	ENSG00000106610.10:ENST00000416602.2:chr7:+:130:345	chr7	+	66767737	66771054	66767737	66771054	2	66767737,66770973,	66767872,66771054,
ENSG00000106610.10	ENSG00000106610.10:ENST00000416602.2:chr7:+:308:727	chr7	+	66771016	66785098	66771016	66785098	4	66771016,66773921,66774550,66785089,	66771070,66774126,66774702,66785098,
ENSG00000205903.2	ENSG00000205903.2:ENST00000427912.1:chr7:+:510:635	chr7	+	6681575	6682120	6681575	6682120	2	6681575,6682012,	6681593,6682120,
ENSG00000205903.2	ENSG00000205903.2:ENST00000382252.1:chr7:+:0:3014	chr7	+	6682040	6694242	6682040	6694242	5	6682040,6682594,6683452,6684110,6691933,	6682395,6682704,6683579,6684224,6694242,
ENSG00000187953.6	ENSG00000187953.6:ENST00000403974.2:chr7:+:126:680	chr7	+	6776747	6777302	6776747	6777302	1	6776747,	6777302,
ENSG00000225648.1	ENSG00000225648.1:ENST00000423945.1:chr7:+:33:50	chr7	+	72300036	72300054	72300036	72300054	1	72300036,	72300054,
ENSG00000225648.1	ENSG00000225648.1:ENST00000415772.1:chr7:+:6:20	chr7	+	72300074	72300089	72300074	72300089	1	72300074,	72300089,
ENSG00000225648.1	ENSG00000225648.1:ENST00000415772.1:chr7:+:17:202	chr7	+	72300085	72300271	72300085	72300271	1	72300085,	72300271,
ENSG00000225648.1	ENSG00000225648.1:ENST00000456312.1:chr7:+:155:286	chr7	+	72300234	72300366	72300234	72300366	1	72300234,	72300366,
ENSG00000225648.1	ENSG00000225648.1:ENST00000437201.1:chr7:+:149:334	chr7	+	72300234	72301329	72300234	72301329	2	72300234,72301271,	72300362,72301329,
ENSG00000225648.1	ENSG00000225648.1:ENST00000415772.1:chr7:+:166:300	chr7	+	72300234	72302188	72300234	72302188	2	72300234,72302181,	72300362,72302188,
ENSG00000225648.1	ENSG00000225648.1:ENST00000456312.1:chr7:+:654:1112	chr7	+	72302237	72307308	72302237	72307308	3	72302237,72304343,72307155,	72302378,72304508,72307308,
ENSG00000123965.12	ENSG00000123965.12:ENST00000337023.5:chr7:+:49:336	chr7	+	74306942	74313892	74306942	74313892	3	74306942,74310232,74313767,	74306965,74310372,74313892,
ENSG00000123965.12	ENSG00000123965.12:ENST00000394959.3:chr7:+:49:561	chr7	+	74306942	74321684	74306942	74321684	9	74306942,74310232,74312262,74313767,74313875,74313921,74317003,74317040,74321682,	74306965,74310372,74312349,74313871,74313917,74313951,74317036,74317092,74321684,
ENSG00000123965.12	ENSG00000123965.12:ENST00000380410.5:chr7:+:232:510	chr7	+	74307578	74312547	74307578	74312547	4	74307578,74310232,74312262,74312515,	74307598,74310372,74312349,74312547,
ENSG00000186704.8	ENSG00000186704.8:ENST00000162863.6:chr7:+:124:651	chr7	+	76610542	76634929	76610542	76634929	6	76610542,76619585,76629625,76631479,76633534,76634866,	76610577,76619686,76629705,76631638,76633624,76634929,
ENSG00000242294.2	ENSG00000242294.2:ENST00000414292.1:chr7:+:14:232	chr7	+	99933761	99935821	99933761	99935821	2	99933761,99935801,	99933960,99935821,
ENSG00000224415.1	ENSG00000224415.1:ENST00000432746.1:chr7:-:264:590	chr7	-	102781795	102782122	102781795	102782122	1	102781795,	102782122,
ENSG00000204959.3	ENSG00000204959.3:ENST00000378112.1:chr7:-:838:4521	chr7	-	143971048	143983279	143971048	143983279	11	143971048,143971838,143973444,143973971,143974300,143974699,143975407,143979373,143979818,143980316,143980905,	143971214,143971996,143973534,143974046,143974430,143974852,143975568,143979627,143979883,143980374,143983279,
ENSG00000233476.2	ENSG00000233476.2:ENST00000434005.1:chr7:-:0:563	chr7	-	22551054	22551618	22551054	22551618	1	22551054,	22551618,
ENSG00000205763.9	ENSG00000205763.9:ENST00000381639.3:chr7:-:464:520	chr7	-	32957976	32960999	32957976	32960999	2	32957976,32960950,	32957984,32960999,
ENSG00000205763.9	ENSG00000205763.9:ENST00000450133.1:chr7:-:171:422	chr7	-	32957983	32969718	32957983	32969718	4	32957983,32960950,32968173,32969689,	32957984,32961042,32968303,32969718,
ENSG00000205763.9	ENSG00000205763.9:ENST00000381639.3:chr7:-:155:364	chr7	-	32973450	32982633	32973450	32982633	2	32973450,32982481,	32973508,32982633,
ENSG00000189212.8	ENSG00000189212.8:ENST00000454445.1:chr7:-:0:1172	chr7	-	35184593	35225653	35184593	35225653	8	35184593,35187401,35189828,35201614,35204442,35218626,35221026,35225332,	35184710,35187497,35189936,35201710,35204583,35218833,35221113,35225653,
ENSG00000272655.1	ENSG00000272655.1:ENST00000326391.6:chr7:-:1296:1394	chr7	-	44053187	44053286	44053187	44053286	1	44053187,	44053286,
ENSG00000272655.1	ENSG00000272655.1:ENST00000326391.6:chr7:-:225:539	chr7	-	44054042	44054357	44054042	44054357	1	44054042,	44054357,
ENSG00000272655.1	ENSG00000272655.1:ENST00000326391.6:chr7:-:142:213	chr7	-	44054368	44056090	44054368	44056090	2	44054368,44056032,	44054382,44056090,
ENSG00000214765.4	ENSG00000214765.4:ENST00000417129.1:chr7:-:285:380	chr7	-	45798751	45808332	45798751	45808332	2	45798751,45808258,	45798773,45808332,
ENSG00000232559.2	ENSG00000232559.2:ENST00000428370.1:chr7:-:337:423	chr7	-	66019729	66019816	66019729	66019816	1	66019729,	66019816,
ENSG00000232559.2	ENSG00000232559.2:ENST00000428370.1:chr7:-:57:335	chr7	-	66019817	66041853	66019817	66041853	3	66019817,66038375,66041744,	66019824,66038538,66041853,
ENSG00000232559.2	ENSG00000232559.2:ENST00000428370.1:chr7:-:1:291	chr7	-	66038412	66041909	66038412	66041909	2	66038412,66041744,	66038538,66041909,
ENSG00000232559.2	ENSG00000232559.2:ENST00000445080.2:chr7:-:169:579	chr7	-	66038456	66053528	66038456	66053528	4	66038456,66041741,66049331,66053498,	66038537,66041919,66049453,66053528,
ENSG00000232559.2	ENSG00000232559.2:ENST00000445080.2:chr7:-:164:334	chr7	-	66041905	66053533	66041905	66053533	3	66041905,66049331,66053498,	66041919,66049453,66053533,
ENSG00000232559.2	ENSG00000232559.2:ENST00000445080.2:chr7:-:43:54	chr7	-	66057318	66057330	66057318	66057330	1	66057318,	66057330,
ENSG00000067601.6	ENSG00000067601.6:ENST00000275546.3:chr7:-:32:52	chr7	-	66767364	66767385	66767364	66767385	1	66767364,	66767385,
ENSG00000106133.13	ENSG00000106133.13:ENST00000485741.2:chr7:-:790:1560	chr7	-	72418922	72420482	72418922	72420482	6	72418922,72419206,72419430,72419591,72419851,72420384,	72419136,72419347,72419519,72419641,72420030,72420482,
ENSG00000174353.13	ENSG00000174353.13:ENST00000436857.1:chr7:-:284:574	chr7	-	72450507	72470952	72450507	72470952	4	72450507,72469993,72470283,72470880,	72450547,72470073,72470382,72470952,
ENSG00000174353.13	ENSG00000174353.13:ENST00000308103.6:chr7:-:480:1001	chr7	-	72468731	72470952	72468731	72470952	5	72468731,72469198,72469993,72470283,72470880,	72468887,72469313,72470073,72470382,72470952,
ENSG00000174353.13	ENSG00000174353.13:ENST00000569650.1:chr7:-:348:791	chr7	-	72469120	72470952	72469120	72470952	4	72469120,72469993,72470283,72470880,	72469313,72470073,72470382,72470952,
ENSG00000174353.13	ENSG00000174353.13:ENST00000423834.2:chr7:-:602:910	chr7	-	72469627	72470952	72469627	72470952	4	72469627,72469993,72470283,72470880,	72469685,72470073,72470382,72470952,
ENSG00000174353.13	ENSG00000174353.13:ENST00000448173.1:chr7:-:478:732	chr7	-	72469989	72470952	72469989	72470952	3	72469989,72470283,72470880,	72470073,72470382,72470952,
ENSG00000174353.13	ENSG00000174353.13:ENST00000426587.1:chr7:-:422:877	chr7	-	72468731	72473549	72468731	72473549	5	72468731,72469198,72469993,72470283,72473543,	72468887,72469313,72470073,72470382,72473549,
ENSG00000174353.13	ENSG00000174353.13:ENST00000428423.1:chr7:-:423:665	chr7	-	72469627	72473549	72469627	72473549	4	72469627,72469993,72470283,72473543,	72469685,72470073,72470382,72473549,
ENSG00000127957.12	ENSG00000127957.12:ENST00000437568.2:chr7:-:536:694	chr7	-	75145478	75155324	75145478	75155324	2	75145478,75155233,	75145546,75155324,
ENSG00000127957.12	ENSG00000127957.12:ENST00000422064.1:chr7:-:41:169	chr7	-	75145478	75157437	75145478	75157437	3	75145478,75155233,75157435,	75145546,75155292,75157437,
ENSG00000243554.1	ENSG00000243554.1:ENST00000453589.1:chr7:-:200:355	chr7	-	97599124	97599659	97599124	97599659	3	97599124,97599445,97599630,	97599157,97599539,97599659,
ENSG00000243554.1	ENSG00000243554.1:ENST00000453589.1:chr7:-:0:341	chr7	-	97599138	97601566	97599138	97601566	5	97599138,97599445,97599630,97599991,97601446,	97599157,97599539,97599688,97600042,97601566,
ENSG00000214142.2	ENSG00000214142.2:ENST00000397636.2:chr7:-:497:514	chr7	-	99737471	99737489	99737471	99737489	1	99737471,	99737489,
ENSG00000078319.7	ENSG00000078319.7:ENST00000431037.1:chr7:-:551:703	chr7	-	99930121	99933530	99930121	99933530	2	99930121,99933460,	99930204,99933530,
ENSG00000228224.3	ENSG00000228224.3:ENST00000419462.1:chr8:+:597:956	chr8	+	102381185	102381545	102381185	102381545	1	102381185,	102381545,
ENSG00000196922.6	ENSG00000196922.6:ENST00000426361.2:chr8:-:214:1659	chr8	-	146202524	146225019	146202524	146225019	2	146202524,146224988,	146203939,146225019,
ENSG00000196922.6	ENSG00000196922.6:ENST00000527222.1:chr8:-:215:421	chr8	-	146219903	146225019	146219903	146225019	3	146219903,146221892,146224988,	146219978,146221993,146225019,
ENSG00000196922.6	ENSG00000196922.6:ENST00000529315.2:chr8:-:388:555	chr8	-	146221856	146225019	146221856	146225019	2	146221856,146224988,	146221993,146225019,
ENSG00000240738.1	ENSG00000240738.1:ENST00000468681.1:chr8:-:104:343	chr8	-	33717397	33717637	33717397	33717637	1	33717397,	33717637,
ENSG00000214654.5	ENSG00000214654.5:ENST00000437707.1:chr9:+:97:138	chr9	+	123555925	123555967	123555925	123555967	1	123555925,	123555967,
ENSG00000214654.5	ENSG00000214654.5:ENST00000540063.1:chr9:+:29:70	chr9	+	123560860	123560902	123560860	123560902	1	123560860,	123560902,
ENSG00000214654.5	ENSG00000214654.5:ENST00000464488.1:chr9:+:70:147	chr9	+	123560901	123560979	123560901	123560979	1	123560901,	123560979,
ENSG00000214654.5	ENSG00000214654.5:ENST00000464488.1:chr9:+:301:345	chr9	+	123561132	123561177	123561132	123561177	1	123561132,	123561177,
ENSG00000196205.7	ENSG00000196205.7:ENST00000436459.2:chr9:+:621:1388	chr9	+	135895493	135896261	135895493	135896261	1	135895493,	135896261,
ENSG00000185020.5	ENSG00000185020.5:ENST00000451450.1:chr9:+:12:161	chr9	+	40293036	40301996	40293036	40301996	2	40293036,40301991,	40293181,40301996,
ENSG00000226823.1	ENSG00000226823.1:ENST00000379514.2:chr9:-:31:345	chr9	-	33503782	33510678	33503782	33510678	5	33503782,33504535,33508356,33509127,33510617,	33503841,33504589,33508427,33509197,33510678,
ENSG00000226823.1	ENSG00000226823.1:ENST00000379514.2:chr9:-:3:104	chr9	-	33509184	33510706	33509184	33510706	2	33509184,33510617,	33509197,33510706,
ENSG00000237238.2	ENSG00000237238.2:ENST00000443754.1:chr9:-:226:891	chr9	-	67328344	67334112	67328344	67334112	6	67328344,67329354,67330584,67330889,67331154,67334094,	67328440,67329477,67330643,67331070,67331343,67334112,
ENSG00000237238.2	ENSG00000237238.2:ENST00000443754.1:chr9:-:39:104	chr9	-	67334233	67334944	67334233	67334944	2	67334233,67334911,	67334266,67334944,
ENSG00000181819.14	ENSG00000181819.14:ENST00000512203.1:chrX:+:0:545	chrX	+	104650317	104651094	104650317	104651094	3	104650317,104650468,104650859,	104650365,104650731,104651094,
ENSG00000234785.1	ENSG00000234785.1:ENST00000434365.1:chrX:+:1049:1309	chrX	+	114938179	114938440	114938179	114938440	1	114938179,	114938440,
ENSG00000214925.3	ENSG00000214925.3:ENST00000399253.3:chrX:+:142:369	chrX	+	140233130	140233358	140233130	140233358	1	140233130,	140233358,
ENSG00000186312.6	ENSG00000186312.6:ENST00000380333.1:chrX:+:8:151	chrX	+	15693845	15706871	15693845	15706871	2	15693845,15706783,	15693901,15706871,
ENSG00000186312.6	ENSG00000186312.6:ENST00000380331.1:chrX:+:104:226	chrX	+	15699135	15706871	15699135	15706871	2	15699135,15706783,	15699170,15706871,
ENSG00000186312.6	ENSG00000186312.6:ENST00000380331.1:chrX:+:289:462	chrX	+	15706933	15715392	15706933	15715392	3	15706933,15711085,15715362,	15706981,15711181,15715392,
ENSG00000186312.6	ENSG00000186312.6:ENST00000380333.1:chrX:+:214:768	chrX	+	15706933	15721315	15706933	15721315	3	15706933,15711085,15720904,	15706981,15711181,15721315,
ENSG00000186312.6	ENSG00000186312.6:ENST00000380336.1:chrX:+:705:839	chrX	+	15715736	15715871	15715736	15715871	1	15715736,	15715871,
ENSG00000197582.5	ENSG00000197582.5:ENST00000388829.3:chrX:-:0:140	chrX	-	13397318	13397459	13397318	13397459	1	13397318,	13397459,
ENSG00000231340.1	ENSG00000231340.1:ENST00000428275.1:chrX:-:614:844	chrX	-	53172250	53172481	53172250	53172481	1	53172250,	53172481,
ENSG00000224208.1	ENSG00000224208.1:ENST00000436372.1:chrX:-:162:284	chrX	-	70535116	70535567	70535116	70535567	2	70535116,70535480,	70535152,70535567,
ENSG00000131002.7	ENSG00000131002.7:ENST00000407724.3:chrY:+:185:580	chrY	+	21749110	21750368	21749110	21750368	2	21749110,21750255,	21749393,21750368,
ENSG00000131002.7	ENSG00000131002.7:ENST00000251749.6:chrY:+:149:691	chrY	+	21749110	21752140	21749110	21752140	5	21749110,21749367,21751406,21751445,21751968,	21749365,21749393,21751443,21751498,21752140,
ENSG00000099725.10	ENSG00000099725.10:ENST00000528056.1:chrY:+:171:398	chrY	+	7142183	7142411	7142183	7142411	1	7142183,	7142411,
ENSG00000099725.10	ENSG00000099725.10:ENST00000362758.5:chrY:+:18:851	chrY	+	7142353	7235415	7142353	7235415	6	7142353,7171977,7193946,7209155,7224175,7235396,	7142519,7172146,7194210,7209275,7224271,7235415,

## Sheet: uORF
RTCA	RTCA:NM_001130841:chr1:+:115:132	chr1	+	100731828	100731846	100731828	100731846	1	100731828,	100731846,
UBE4B	UBE4B:NM_001105562:chr1:+:372:398	chr1	+	10093412	10093439	10093412	10093439	1	10093412,	10093439,
UBE4B	UBE4B:NM_001105562:chr1:+:555:566	chr1	+	10093595	10093607	10093595	10093607	1	10093595,	10093607,
SLC30A7	SLC30A7:NM_001144884:chr1:+:88:105	chr1	+	101361719	101361737	101361719	101361737	1	101361719,	101361737,
APITD1-CORT	APITD1-CORT:NM_001270517:chr1:+:354:416	chr1	+	10490512	10490575	10490512	10490575	1	10490512,	10490575,
APITD1-CORT	APITD1-CORT:NM_001243768:chr1:+:103:297	chr1	+	10490906	10491101	10490906	10491101	1	10490906,	10491101,
PRPF38B	PRPF38B:NM_018061:chr1:+:188:196	chr1	+	109235119	109235128	109235119	109235128	1	109235119,	109235128,
GPSM2	GPSM2:NM_013296:chr1:+:250:270	chr1	+	109427898	109427919	109427898	109427919	1	109427898,	109427919,
GPSM2	GPSM2:NM_013296:chr1:+:282:347	chr1	+	109427930	109427996	109427930	109427996	1	109427930,	109427996,
GPSM2	GPSM2:NM_013296:chr1:+:409:459	chr1	+	109428057	109428108	109428057	109428108	1	109428057,	109428108,
GNAI3	GNAI3:NM_006496:chr1:+:114:119	chr1	+	110091299	110091305	110091299	110091305	1	110091299,	110091305,
AMPD2	AMPD2:NM_001257360:chr1:+:78:299	chr1	+	110162512	110162734	110162512	110162734	1	110162512,	110162734,
AMPD2	AMPD2:NM_001257360:chr1:+:122:139	chr1	+	110162556	110162574	110162556	110162574	1	110162556,	110162574,
AMPD2	AMPD2:NM_001257360:chr1:+:296:352	chr1	+	110162730	110162787	110162730	110162787	1	110162730,	110162787,
AHCYL1	AHCYL1:NM_001242673:chr1:+:288:656	chr1	+	110527674	110528043	110527674	110528043	1	110527674,	110528043,
TARDBP	TARDBP:NM_007375:chr1:+:35:118	chr1	+	11072713	11072797	11072713	11072797	1	11072713,	11072797,
RAP1A	RAP1A:NM_001010935:chr1:+:43:156	chr1	+	112162447	112170096	112162447	112170096	2	112162447,112170091,	112162556,112170096,
CTTNBP2NL	CTTNBP2NL:NM_018704:chr1:+:114:131	chr1	+	112954834	112954852	112954834	112954852	1	112954834,	112954852,
CAPZA1	CAPZA1:NM_006135:chr1:+:267:323	chr1	+	113162341	113162398	113162341	113162398	1	113162341,	113162398,
DCLRE1B	DCLRE1B:NM_022836:chr1:+:155:175	chr1	+	114448069	114448090	114448069	114448090	1	114448069,	114448090,
DCLRE1B	DCLRE1B:NM_022836:chr1:+:203:277	chr1	+	114448117	114448192	114448117	114448192	1	114448117,	114448192,
VANGL1	VANGL1:NM_001172411:chr1:+:153:203	chr1	+	116193916	116193967	116193916	116193967	1	116193916,	116193967,
MAN1A2	MAN1A2:NM_006699:chr1:+:25:261	chr1	+	117910109	117910346	117910109	117910346	1	117910109,	117910346,
MAN1A2	MAN1A2:NM_006699:chr1:+:387:443	chr1	+	117910471	117910528	117910471	117910528	1	117910471,	117910528,
PHGDH	PHGDH:NM_006623:chr1:+:106:150	chr1	+	120254524	120254569	120254524	120254569	1	120254524,	120254569,
MFN2	MFN2:NM_001127660:chr1:+:275:301	chr1	+	12040512	12040539	12040512	12040539	1	12040512,	12040539,
MFN2	MFN2:NM_014874:chr1:+:350:412	chr1	+	12042072	12042135	12042072	12042135	1	12042072,	12042135,
MFN2	MFN2:NM_014874:chr1:+:403:426	chr1	+	12042125	12042149	12042125	12042149	1	12042125,	12042149,
MIIP	MIIP:NM_021933:chr1:+:291:314	chr1	+	12079589	12081705	12079589	12081705	2	12079589,12081701,	12079609,12081705,
MIIP	MIIP:NM_021933:chr1:+:326:370	chr1	+	12081716	12081761	12081716	12081761	1	12081716,	12081761,
FAM72B	FAM72B:NM_001100910:chr1:+:334:351	chr1	+	120839338	120839356	120839338	120839356	1	120839338,	120839356,
VPS13D	VPS13D:NM_015378:chr1:+:79:102	chr1	+	12294261	12294285	12294261	12294285	1	12294261,	12294285,
GLTPD1	GLTPD1:NM_001029885:chr1:+:343:363	chr1	+	1262218	1262239	1262218	1262239	1	1262218,	1262239,
SEC22B	SEC22B:NM_004892:chr1:+:30:44	chr1	+	145096436	145096451	145096436	145096451	1	145096436,	145096451,
SEC22B	SEC22B:NM_004892:chr1:+:63:86	chr1	+	145096469	145096493	145096469	145096493	1	145096469,	145096493,
SEC22B	SEC22B:NM_004892:chr1:+:114:137	chr1	+	145096520	145096544	145096520	145096544	1	145096520,	145096544,
NOTCH2NL	NOTCH2NL:NM_203458:chr1:+:198:350	chr1	+	145209308	145248837	145209308	145248837	2	145209308,145248812,	145209436,145248837,
NOTCH2NL	NOTCH2NL:NM_203458:chr1:+:323:361	chr1	+	145209433	145248848	145209433	145248848	2	145209433,145248812,	145209436,145248848,
TXNIP	TXNIP:NM_006472:chr1:+:186:245	chr1	+	145438647	145438707	145438647	145438707	1	145438647,	145438707,
TXNIP	TXNIP:NM_006472:chr1:+:260:322	chr1	+	145438721	145438784	145438721	145438784	1	145438721,	145438784,
RNF115	RNF115:NM_014455:chr1:+:58:90	chr1	+	145611093	145611126	145611093	145611126	1	145611093,	145611126,
CHD1L	CHD1L:NM_024568:chr1:+:63:311	chr1	+	146714353	146726561	146714353	146726561	3	146714353,146724277,146726552,	146714480,146724390,146726561,
CHD1L	CHD1L:NM_001256337:chr1:+:63:233	chr1	+	146714353	146731534	146714353	146731534	2	146714353,146731490,	146714480,146731534,
CHD1L	CHD1L:NM_024568:chr1:+:274:315	chr1	+	146724361	146726565	146724361	146726565	2	146724361,146726552,	146724390,146726565,
NBPF15	NBPF15:NM_001170755:chr1:+:125:343	chr1	+	148560872	148561091	148560872	148561091	1	148560872,	148561091,
NBPF15	NBPF15:NM_001170755:chr1:+:344:430	chr1	+	148561091	148568767	148561091	148568767	3	148561091,148566849,148568735,	148561115,148566880,148568767,
BOLA1	BOLA1:NM_016074:chr1:+:94:117	chr1	+	149871585	149871609	149871585	149871609	1	149871585,	149871609,
PLEKHO1	PLEKHO1:NM_016274:chr1:+:27:104	chr1	+	150122196	150122274	150122196	150122274	1	150122196,	150122274,
MRPS21	MRPS21:NM_018997:chr1:+:183:314	chr1	+	150266451	150266583	150266451	150266583	1	150266451,	150266583,
MRPS21	MRPS21:NM_018997:chr1:+:496:507	chr1	+	150266764	150266776	150266764	150266776	1	150266764,	150266776,
PRPF3	PRPF3:NM_004698:chr1:+:122:136	chr1	+	150297360	150297375	150297360	150297375	1	150297360,	150297375,
ECM1	ECM1:NM_001202858:chr1:+:126:173	chr1	+	150480612	150480660	150480612	150480660	1	150480612,	150480660,
ADAMTSL4	ADAMTSL4:NM_019032:chr1:+:172:183	chr1	+	150524700	150524712	150524700	150524712	1	150524700,	150524712,
PRUNE	PRUNE:NM_021222:chr1:+:20:43	chr1	+	150980992	150981016	150980992	150981016	1	150980992,	150981016,
MLLT11	MLLT11:NM_006818:chr1:+:792:872	chr1	+	151032942	151033023	151032942	151033023	1	151032942,	151033023,
GABPB2	GABPB2:NM_144618:chr1:+:64:237	chr1	+	151043143	151043317	151043143	151043317	1	151043143,	151043317,
SCNM1	SCNM1:NM_001204856:chr1:+:60:131	chr1	+	151138557	151138629	151138557	151138629	1	151138557,	151138629,
SCNM1	SCNM1:NM_001204856:chr1:+:131:277	chr1	+	151138628	151138993	151138628	151138993	2	151138628,151138946,	151138728,151138993,
PIP5K1A	PIP5K1A:NM_001135636:chr1:+:110:187	chr1	+	151171130	151171208	151171130	151171208	1	151171130,	151171208,
PIP5K1A	PIP5K1A:NM_001135636:chr1:+:257:313	chr1	+	151171277	151171334	151171277	151171334	1	151171277,	151171334,
KAZN	KAZN:NM_001017999:chr1:+:14:151	chr1	+	15272428	15272566	15272428	15272566	1	15272428,	15272566,
S100A9	S100A9:NM_002965:chr1:+:11:28	chr1	+	153330340	153330745	153330340	153330745	2	153330340,153330744,	153330357,153330745,
CHTOP	CHTOP:NM_001206612:chr1:+:101:211	chr1	+	153606558	153606669	153606558	153606669	1	153606558,	153606669,
CHTOP	CHTOP:NM_001206612:chr1:+:208:255	chr1	+	153606665	153606713	153606665	153606713	1	153606665,	153606713,
INTS3	INTS3:NM_023015:chr1:+:15:38	chr1	+	153700581	153700605	153700581	153700605	1	153700581,	153700605,
INTS3	INTS3:NM_023015:chr1:+:356:517	chr1	+	153700922	153701084	153700922	153701084	1	153700922,	153701084,
CREB3L4	CREB3L4:NM_001255978:chr1:+:84:209	chr1	+	153940398	153940524	153940398	153940524	1	153940398,	153940524,
UBAP2L	UBAP2L:NM_014847:chr1:+:112:141	chr1	+	154193436	154197574	154193436	154197574	2	154193436,154197559,	154193451,154197574,
UBAP2L	UBAP2L:NM_001127320:chr1:+:91:105	chr1	+	154197584	154197599	154197584	154197599	1	154197584,	154197599,
IL6R	IL6R:NM_000565:chr1:+:412:423	chr1	+	154378080	154378092	154378080	154378092	1	154378080,	154378092,
CKS1B	CKS1B:NM_001826:chr1:+:44:82	chr1	+	154947161	154947200	154947161	154947200	1	154947161,	154947200,
FLAD1	FLAD1:NM_025207:chr1:+:278:343	chr1	+	154956047	154956113	154956047	154956113	1	154956047,	154956113,
FLAD1	FLAD1:NM_001184891:chr1:+:138:158	chr1	+	154956351	154956372	154956351	154956372	1	154956351,	154956372,
FLAD1	FLAD1:NM_001184892:chr1:+:248:352	chr1	+	154956461	154959965	154956461	154959965	2	154956461,154959941,	154956542,154959965,
ZBTB7B	ZBTB7B:NM_001252406:chr1:+:13:60	chr1	+	154975118	154975166	154975118	154975166	1	154975118,	154975166,
ZBTB7B	ZBTB7B:NM_001252406:chr1:+:269:274	chr1	+	154975374	154975380	154975374	154975380	1	154975374,	154975380,
FDPS	FDPS:NM_001135821:chr1:+:62:160	chr1	+	155278766	155278865	155278766	155278865	1	155278766,	155278865,
TMEM51	TMEM51:NM_001136216:chr1:+:277:456	chr1	+	15537009	15541521	15537009	15541521	2	15537009,15541390,	15537058,15541521,
TMEM51	TMEM51:NM_001136217:chr1:+:321:383	chr1	+	15541458	15541521	15541458	15541521	1	15541458,	15541521,
DAP3	DAP3:NM_001199849:chr1:+:41:70	chr1	+	155658922	155658952	155658922	155658952	1	155658922,	155658952,
LAMTOR2	LAMTOR2:NM_001145264:chr1:+:129:152	chr1	+	156024645	156024669	156024645	156024669	1	156024645,	156024669,
RAB25	RAB25:NM_020387:chr1:+:34:153	chr1	+	156030999	156031119	156030999	156031119	1	156030999,	156031119,
SLC25A44	SLC25A44:NM_014655:chr1:+:185:253	chr1	+	156163914	156163983	156163914	156163983	1	156163914,	156163983,
RRNAD1	RRNAD1:NM_001142560:chr1:+:92:118	chr1	+	156698354	156698381	156698354	156698381	1	156698354,	156698381,
RRNAD1	RRNAD1:NM_001142560:chr1:+:128:193	chr1	+	156698390	156698456	156698390	156698456	1	156698390,	156698456,
RRNAD1	RRNAD1:NM_001142560:chr1:+:172:402	chr1	+	156698434	156698665	156698434	156698665	1	156698434,	156698665,
PRCC	PRCC:NM_005973:chr1:+:94:132	chr1	+	156737367	156737406	156737367	156737406	1	156737367,	156737406,
PRCC	PRCC:NM_005973:chr1:+:135:155	chr1	+	156737408	156737429	156737408	156737429	1	156737408,	156737429,
FBLIM1	FBLIM1:NM_001024215:chr1:+:39:137	chr1	+	16091032	16091131	16091032	16091131	1	16091032,	16091131,
FBLIM1	FBLIM1:NM_001024215:chr1:+:118:165	chr1	+	16091111	16091159	16091111	16091159	1	16091111,	16091159,
NIT1	NIT1:NM_001185093:chr1:+:40:96	chr1	+	161087946	161088003	161087946	161088003	1	161087946,	161088003,
UFC1	UFC1:NM_016406:chr1:+:36:65	chr1	+	161123569	161123599	161123569	161123599	1	161123569,	161123599,
UFC1	UFC1:NM_016406:chr1:+:90:113	chr1	+	161123623	161123647	161123623	161123647	1	161123623,	161123647,
UFC1	UFC1:NM_016406:chr1:+:187:201	chr1	+	161123720	161123735	161123720	161123735	1	161123720,	161123735,
USP21	USP21:NM_001014443:chr1:+:60:164	chr1	+	161129313	161129418	161129313	161129418	1	161129313,	161129418,
TOMM40L	TOMM40L:NM_032174:chr1:+:27:89	chr1	+	161195859	161195922	161195859	161195922	1	161195859,	161195922,
TOMM40L	TOMM40L:NM_032174:chr1:+:109:180	chr1	+	161196159	161196231	161196159	161196231	1	161196159,	161196231,
SPEN	SPEN:NM_015001:chr1:+:40:141	chr1	+	16174398	16174500	16174398	16174500	1	16174398,	16174500,
UHMK1	UHMK1:NM_144624:chr1:+:44:55	chr1	+	162467638	162467650	162467638	162467650	1	162467638,	162467650,
UAP1	UAP1:NM_003115:chr1:+:218:322	chr1	+	162531513	162535852	162531513	162535852	2	162531513,162535801,	162531567,162535852,
DDR2	DDR2:NM_001014796:chr1:+:56:151	chr1	+	162602283	162602379	162602283	162602379	1	162602283,	162602379,
DDR2	DDR2:NM_001014796:chr1:+:188:274	chr1	+	162602415	162625081	162602415	162625081	2	162602415,162625000,	162602421,162625081,
DDR2	DDR2:NM_001014796:chr1:+:222:356	chr1	+	162625028	162625163	162625028	162625163	1	162625028,	162625163,
NUF2	NUF2:NM_031423:chr1:+:48:68	chr1	+	163291770	163291791	163291770	163291791	1	163291770,	163291791,
NUF2	NUF2:NM_031423:chr1:+:128:133	chr1	+	163291850	163291856	163291850	163291856	1	163291850,	163291856,
NUF2	NUF2:NM_145697:chr1:+:219:284	chr1	+	163291941	163295826	163291941	163295826	2	163291941,163295821,	163292002,163295826,
PBX1	PBX1:NM_001204961:chr1:+:21:83	chr1	+	164528617	164528680	164528617	164528680	1	164528617,	164528680,
MGST3	MGST3:NM_004528:chr1:+:33:116	chr1	+	165600142	165600226	165600142	165600226	1	165600142,	165600226,
MGST3	MGST3:NM_004528:chr1:+:94:162	chr1	+	165600203	165600272	165600203	165600272	1	165600203,	165600272,
UCK2	UCK2:NM_012474:chr1:+:117:122	chr1	+	165796848	165796854	165796848	165796854	1	165796848,	165796854,
POGK	POGK:NM_017542:chr1:+:50:61	chr1	+	166808773	166808785	166808773	166808785	1	166808773,	166808785,
DCAF6	DCAF6:NM_001017977:chr1:+:126:143	chr1	+	167905922	167905940	167905922	167905940	1	167905922,	167905940,
DCAF6	DCAF6:NM_001017977:chr1:+:154:225	chr1	+	167905950	167906022	167905950	167906022	1	167905950,	167906022,
ATP1B1	ATP1B1:NM_001677:chr1:+:16:108	chr1	+	169075962	169076055	169075962	169076055	1	169075962,	169076055,
BLZF1	BLZF1:NM_003666:chr1:+:48:92	chr1	+	169337241	169337286	169337241	169337286	1	169337241,	169337286,
BLZF1	BLZF1:NM_003666:chr1:+:142:222	chr1	+	169337335	169337416	169337335	169337416	1	169337335,	169337416,
BLZF1	BLZF1:NM_003666:chr1:+:261:308	chr1	+	169337454	169337502	169337454	169337502	1	169337454,	169337502,
BLZF1	BLZF1:NM_003666:chr1:+:404:427	chr1	+	169338727	169338751	169338727	169338751	1	169338727,	169338751,
METTL13	METTL13:NM_001007239:chr1:+:158:178	chr1	+	171750918	171750939	171750918	171750939	1	171750918,	171750939,
METTL13	METTL13:NM_014955:chr1:+:158:184	chr1	+	171750918	171752889	171750918	171752889	2	171750918,171752879,	171750935,171752889,
METTL13	METTL13:NM_001007239:chr1:+:216:311	chr1	+	171750976	171751072	171750976	171751072	1	171750976,	171751072,
SUCO	SUCO:NM_014283:chr1:+:30:110	chr1	+	172502289	172502370	172502289	172502370	1	172502289,	172502370,
SUCO	SUCO:NM_016227:chr1:+:6:53	chr1	+	172502322	172502370	172502322	172502370	1	172502322,	172502370,
SUCO	SUCO:NM_014283:chr1:+:132:203	chr1	+	172502391	172502463	172502391	172502463	1	172502391,	172502463,
DARS2	DARS2:NM_018122:chr1:+:229:324	chr1	+	173794025	173794121	173794025	173794121	1	173794025,	173794121,
DARS2	DARS2:NM_018122:chr1:+:324:332	chr1	+	173794120	173794129	173794120	173794129	1	173794120,	173794129,
DARS2	DARS2:NM_018122:chr1:+:424:483	chr1	+	173794220	173794280	173794220	173794280	1	173794220,	173794280,
ZBTB37	ZBTB37:NM_001122770:chr1:+:181:255	chr1	+	173838192	173839343	173838192	173839343	2	173838192,173839334,	173838258,173839343,
ZBTB37	ZBTB37:NM_032522:chr1:+:181:252	chr1	+	173838192	173839343	173838192	173839343	2	173838192,173839337,	173838258,173839343,
CACYBP	CACYBP:NM_001007214:chr1:+:170:217	chr1	+	174968740	174968788	174968740	174968788	1	174968740,	174968788,
CACYBP	CACYBP:NM_014412:chr1:+:189:332	chr1	+	174969080	174969224	174969080	174969224	1	174969080,	174969224,
RASAL2	RASAL2:NM_170692:chr1:+:30:413	chr1	+	178062893	178063277	178062893	178063277	1	178062893,	178063277,
RALGPS2	RALGPS2:NM_152663:chr1:+:135:176	chr1	+	178694434	178694476	178694434	178694476	1	178694434,	178694476,
RALGPS2	RALGPS2:NM_152663:chr1:+:189:260	chr1	+	178694488	178745822	178694488	178745822	2	178694488,178745816,	178694554,178745822,
RALGPS2	RALGPS2:NM_152663:chr1:+:260:283	chr1	+	178745821	178745845	178745821	178745845	1	178745821,	178745845,
FAM20B	FAM20B:NM_014864:chr1:+:13:57	chr1	+	178995086	178995131	178995086	178995131	1	178995086,	178995131,
FAM20B	FAM20B:NM_014864:chr1:+:188:205	chr1	+	179012877	179012895	179012877	179012895	1	179012877,	179012895,
FAM20B	FAM20B:NM_014864:chr1:+:196:225	chr1	+	179012885	179012915	179012885	179012915	1	179012885,	179012915,
SOAT1	SOAT1:NM_001252511:chr1:+:148:165	chr1	+	179262996	179263014	179262996	179263014	1	179262996,	179263014,
TOR1AIP1	TOR1AIP1:NM_001267578:chr1:+:151:351	chr1	+	179851327	179851528	179851327	179851528	1	179851327,	179851528,
CEP350	CEP350:NM_014810:chr1:+:52:81	chr1	+	179923959	179923989	179923959	179923989	1	179923959,	179923989,
XPR1	XPR1:NM_001135669:chr1:+:12:50	chr1	+	180601157	180601196	180601157	180601196	1	180601157,	180601196,
NPL	NPL:NM_001200050:chr1:+:331:522	chr1	+	182758914	182775371	182758914	182775371	3	182758914,182772832,182775279,	182758940,182772906,182775371,
NPL	NPL:NM_001200051:chr1:+:353:412	chr1	+	182758936	182763491	182758936	182763491	3	182758936,182761366,182763490,	182758940,182761421,182763491,
DHX9	DHX9:NM_001357:chr1:+:63:125	chr1	+	182808501	182808564	182808501	182808564	1	182808501,	182808564,
DHX9	DHX9:NM_001357:chr1:+:129:158	chr1	+	182808567	182811685	182808567	182811685	2	182808567,182811679,	182808591,182811685,
LAMC1	LAMC1:NM_002293:chr1:+:216:236	chr1	+	182992810	182992831	182992810	182992831	1	182992810,	182992831,
SMG7	SMG7:NM_001174061:chr1:+:149:202	chr1	+	183441654	183441708	183441654	183441708	1	183441654,	183441708,
SMG7	SMG7:NM_001174061:chr1:+:256:285	chr1	+	183441761	183485015	183441761	183485015	2	183441761,183485008,	183441784,183485015,
C1orf21	C1orf21:NM_030806:chr1:+:140:367	chr1	+	184356289	184446534	184356289	184446534	2	184356289,184446519,	184356502,184446534,
C1orf21	C1orf21:NM_030806:chr1:+:195:404	chr1	+	184356344	184446571	184356344	184446571	2	184356344,184446519,	184356502,184446571,
C1orf21	C1orf21:NM_030806:chr1:+:414:431	chr1	+	184446580	184446598	184446580	184446598	1	184446580,	184446598,
C1orf21	C1orf21:NM_030806:chr1:+:434:472	chr1	+	184446600	184446639	184446600	184446639	1	184446600,	184446639,
C1orf27	C1orf27:NM_001164245:chr1:+:185:226	chr1	+	186345074	186348908	186345074	186348908	2	186345074,186348898,	186345106,186348908,
TROVE2	TROVE2:NM_001173524:chr1:+:211:363	chr1	+	193028762	193038172	193028762	193038172	2	193028762,193038163,	193028906,193038172,
TROVE2	TROVE2:NM_001042369:chr1:+:272:331	chr1	+	193029275	193029335	193029275	193029335	1	193029275,	193029335,
PQLC2	PQLC2:NM_001040125:chr1:+:396:554	chr1	+	19639135	19639294	19639135	19639294	1	19639135,	19639294,
CFH	CFH:NM_000186:chr1:+:186:215	chr1	+	196621193	196621223	196621193	196621223	1	196621193,	196621223,
CFH	CFH:NM_000186:chr1:+:216:227	chr1	+	196621223	196621235	196621223	196621235	1	196621223,	196621235,
LHX9	LHX9:NM_020204:chr1:+:116:235	chr1	+	197886632	197886752	197886632	197886752	1	197886632,	197886752,
LHX9	LHX9:NM_020204:chr1:+:409:417	chr1	+	197886925	197886934	197886925	197886934	1	197886925,	197886934,
NEK7	NEK7:NM_133494:chr1:+:166:306	chr1	+	198126273	198201690	198126273	198201690	2	198126273,198201682,	198126406,198201690,
PRKCZ	PRKCZ:NM_002744:chr1:+:29:139	chr1	+	1981937	1982048	1981937	1982048	1	1981937,	1982048,
C1orf151-NBL1	C1orf151-NBL1:NM_001204088:chr1:+:69:230	chr1	+	19923539	19927378	19923539	19927378	2	19923539,19927280,	19923603,19927378,
CAMSAP2	CAMSAP2:NM_203459:chr1:+:53:124	chr1	+	200708738	200708810	200708738	200708810	1	200708738,	200708810,
CAMSAP2	CAMSAP2:NM_203459:chr1:+:169:177	chr1	+	200708854	200708863	200708854	200708863	1	200708854,	200708863,
CAMSAP2	CAMSAP2:NM_203459:chr1:+:225:230	chr1	+	200708910	200708916	200708910	200708916	1	200708910,	200708916,
ATP2B4	ATP2B4:NM_001001396:chr1:+:66:101	chr1	+	203595980	203596016	203595980	203596016	1	203595980,	203596016,
ATP2B4	ATP2B4:NM_001001396:chr1:+:374:403	chr1	+	203596288	203596318	203596288	203596318	1	203596288,	203596318,
ATP2B4	ATP2B4:NM_001001396:chr1:+:410:424	chr1	+	203596324	203596339	203596324	203596339	1	203596324,	203596339,
ATP2B4	ATP2B4:NM_001001396:chr1:+:525:575	chr1	+	203651961	203652012	203651961	203652012	1	203651961,	203652012,
ZC3H11A	ZC3H11A:NM_014827:chr1:+:139:327	chr1	+	203764889	203765595	203764889	203765595	2	203764889,203765420,	203764903,203765595,
ZC3H11A	ZC3H11A:NM_014827:chr1:+:327:353	chr1	+	203765594	203765621	203765594	203765621	1	203765594,	203765621,
ZC3H11A	ZC3H11A:NM_014827:chr1:+:359:469	chr1	+	203770704	203772143	203770704	203772143	2	203770704,203772084,	203770756,203772143,
SOX13	SOX13:NM_005686:chr1:+:141:494	chr1	+	204042386	204042740	204042386	204042740	1	204042386,	204042740,
MDM4	MDM4:NM_001204171:chr1:+:45:62	chr1	+	204485551	204485569	204485551	204485569	1	204485551,	204485569,
IKBKE	IKBKE:NM_001193321:chr1:+:301:366	chr1	+	206643886	206643952	206643886	206643952	1	206643886,	206643952,
IKBKE	IKBKE:NM_001193321:chr1:+:378:398	chr1	+	206643963	206643984	206643963	206643984	1	206643963,	206643984,
IKBKE	IKBKE:NM_001193321:chr1:+:451:522	chr1	+	206644036	206644565	206644036	206644565	2	206644036,206644498,	206644041,206644565,
IL24	IL24:NM_001185156:chr1:+:27:77	chr1	+	207070814	207070865	207070814	207070865	1	207070814,	207070865,
IL24	IL24:NM_001185156:chr1:+:68:91	chr1	+	207070855	207070879	207070855	207070879	1	207070855,	207070879,
IL24	IL24:NM_001185156:chr1:+:182:232	chr1	+	207071084	207071135	207071084	207071135	1	207071084,	207071135,
CD46	CD46:NM_002389:chr1:+:49:63	chr1	+	207925431	207925446	207925431	207925446	1	207925431,	207925446,
MIR205HG	MIR205HG:NM_001104548:chr1:+:204:302	chr1	+	209602371	209602562	209602371	209602562	2	209602371,209602525,	209602433,209602562,
MIR205HG	MIR205HG:NM_001104548:chr1:+:281:310	chr1	+	209602540	209602570	209602540	209602570	1	209602540,	209602570,
MIR205HG	MIR205HG:NM_001104548:chr1:+:347:364	chr1	+	209602606	209602624	209602606	209602624	1	209602606,	209602624,
G0S2	G0S2:NM_015714:chr1:+:86:223	chr1	+	209848755	209848893	209848755	209848893	1	209848755,	209848893,
DTL	DTL:NM_016448:chr1:+:195:314	chr1	+	212209113	212209233	212209113	212209233	1	212209113,	212209233,
PPP2R5A	PPP2R5A:NM_006243:chr1:+:37:54	chr1	+	212458915	212458933	212458915	212458933	1	212458915,	212458933,
PPP2R5A	PPP2R5A:NM_006243:chr1:+:387:398	chr1	+	212459265	212459277	212459265	212459277	1	212459265,	212459277,
CENPF	CENPF:NM_016343:chr1:+:144:155	chr1	+	214787067	214787079	214787067	214787079	1	214787067,	214787079,
NBPF3	NBPF3:NM_001256416:chr1:+:54:65	chr1	+	21766674	21766686	21766674	21766686	1	21766674,	21766686,
NBPF3	NBPF3:NM_001256416:chr1:+:165:269	chr1	+	21766785	21771489	21766785	21771489	2	21766785,21771440,	21766841,21771489,
BROX	BROX:NM_144695:chr1:+:25:123	chr1	+	222885930	222886029	222885930	222886029	1	222885930,	222886029,
BROX	BROX:NM_144695:chr1:+:130:150	chr1	+	222886035	222886056	222886035	222886056	1	222886035,	222886056,
BROX	BROX:NM_144695:chr1:+:187:210	chr1	+	222886092	222886116	222886092	222886116	1	222886092,	222886116,
BROX	BROX:NM_144695:chr1:+:216:281	chr1	+	222886121	222886187	222886121	222886187	1	222886121,	222886187,
CAPN2	CAPN2:NM_001146068:chr1:+:12:23	chr1	+	223889306	223889318	223889306	223889318	1	223889306,	223889318,
SRP9	SRP9:NM_001130440:chr1:+:95:121	chr1	+	225965609	225965636	225965609	225965636	1	225965609,	225965636,
PSEN2	PSEN2:NM_000447:chr1:+:169:195	chr1	+	227059053	227059080	227059053	227059080	1	227059053,	227059080,
PSEN2	PSEN2:NM_000447:chr1:+:256:261	chr1	+	227063100	227063106	227063100	227063106	1	227063100,	227063106,
GUK1	GUK1:NM_000858:chr1:+:75:245	chr1	+	228328003	228328934	228328003	228328934	2	228328003,228328824,	228328064,228328934,
GNPAT	GNPAT:NM_014236:chr1:+:53:166	chr1	+	231376971	231377085	231376971	231377085	1	231376971,	231377085,
SPRTN	SPRTN:NM_001010984:chr1:+:219:272	chr1	+	231473900	231473954	231473900	231473954	1	231473900,	231473954,
TSNAX	TSNAX:NM_005999:chr1:+:148:153	chr1	+	231664546	231664552	231664546	231664552	1	231664546,	231664552,
NTPCR	NTPCR:NM_032324:chr1:+:9:23	chr1	+	233086378	233086393	233086378	233086393	1	233086378,	233086393,
KIAA1804	KIAA1804:NM_032435:chr1:+:18:119	chr1	+	233463531	233463633	233463531	233463633	1	233463531,	233463633,
COA6	COA6:NM_001206641:chr1:+:195:224	chr1	+	234509408	234509989	234509408	234509989	2	234509408,234509975,	234509424,234509989,
TBCE	TBCE:NM_003193:chr1:+:73:123	chr1	+	235530800	235543365	235530800	235543365	2	235530800,235543333,	235530819,235543365,
TBCE	TBCE:NM_001079515:chr1:+:73:171	chr1	+	235530800	235543365	235530800	235543365	2	235530800,235543333,	235530867,235543365,
LGALS8	LGALS8:NM_006499:chr1:+:250:306	chr1	+	236687333	236689296	236687333	236689296	2	236687333,236689267,	236687361,236689296,
LGALS8	LGALS8:NM_006499:chr1:+:314:328	chr1	+	236689303	236689318	236689303	236689318	1	236689303,	236689318,
MTR	MTR:NM_000254:chr1:+:63:155	chr1	+	236958643	236958736	236958643	236958736	1	236958643,	236958736,
EXO1	EXO1:NM_130398:chr1:+:64:90	chr1	+	242011556	242011583	242011556	242011583	1	242011556,	242011583,
EXO1	EXO1:NM_003686:chr1:+:24:71	chr1	+	242012056	242012104	242012056	242012104	1	242012056,	242012104,
EXO1	EXO1:NM_003686:chr1:+:79:186	chr1	+	242012111	242012219	242012111	242012219	1	242012111,	242012219,
PNRC2	PNRC2:NM_017761:chr1:+:15:170	chr1	+	24286315	24286471	24286315	24286471	1	24286315,	24286471,
PNRC2	PNRC2:NM_017761:chr1:+:227:397	chr1	+	24287457	24287933	24287457	24287933	2	24287457,24287929,	24287624,24287933,
SDCCAG8	SDCCAG8:NM_006642:chr1:+:97:159	chr1	+	243419403	243419466	243419403	243419466	1	243419403,	243419466,
COX20	COX20:NM_198076:chr1:+:140:229	chr1	+	244998778	244998868	244998778	244998868	1	244998778,	244998868,
CNST	CNST:NM_001139459:chr1:+:257:301	chr1	+	246729895	246729940	246729895	246729940	1	246729895,	246729940,
NIPAL3	NIPAL3:NM_020448:chr1:+:60:266	chr1	+	24742304	24745897	24742304	24745897	2	24742304,24745780,	24742394,24745897,
NIPAL3	NIPAL3:NM_020448:chr1:+:163:222	chr1	+	24745793	24745853	24745793	24745853	1	24745793,	24745853,
NIPAL3	NIPAL3:NM_020448:chr1:+:223:246	chr1	+	24745853	24745877	24745853	24745877	1	24745853,	24745877,
NIPAL3	NIPAL3:NM_020448:chr1:+:281:292	chr1	+	24745911	24745923	24745911	24745923	1	24745911,	24745923,
NIPAL3	NIPAL3:NM_020448:chr1:+:328:354	chr1	+	24745958	24745985	24745958	24745985	1	24745958,	24745985,
TNFRSF14	TNFRSF14:NM_003820:chr1:+:110:289	chr1	+	2487914	2488094	2487914	2488094	1	2487914,	2488094,
ZNF672	ZNF672:NM_024836:chr1:+:256:276	chr1	+	249138716	249138737	249138716	249138737	1	249138716,	249138737,
ZNF672	ZNF672:NM_024836:chr1:+:327:362	chr1	+	249138787	249138823	249138787	249138823	1	249138787,	249138823,
ZNF672	ZNF672:NM_024836:chr1:+:362:613	chr1	+	249138822	249141392	249138822	249141392	3	249138822,249139764,249141250,	249138835,249139861,249141392,
TMEM50A	TMEM50A:NM_014313:chr1:+:31:87	chr1	+	25664819	25664876	25664819	25664876	1	25664819,	25664876,
TMEM50A	TMEM50A:NM_014313:chr1:+:153:161	chr1	+	25664941	25666967	25664941	25666967	2	25664941,25666964,	25664947,25666967,
TMEM50A	TMEM50A:NM_014313:chr1:+:158:166	chr1	+	25664946	25666972	25664946	25666972	2	25664946,25666964,	25664947,25666972,
FAM54B	FAM54B:NM_001099625:chr1:+:124:132	chr1	+	26149509	26149518	26149509	26149518	1	26149509,	26149518,
DHDDS	DHDDS:NM_001243564:chr1:+:120:128	chr1	+	26759406	26759415	26759406	26759415	1	26759406,	26759415,
ARID1A	ARID1A:NM_006015:chr1:+:87:200	chr1	+	27022608	27022722	27022608	27022722	1	27022608,	27022722,
PIGV	PIGV:NM_017837:chr1:+:83:313	chr1	+	27114536	27117257	27114536	27117257	2	27114536,27117249,	27114759,27117257,
WDTC1	WDTC1:NM_015023:chr1:+:292:306	chr1	+	27561298	27561313	27561298	27561313	1	27561298,	27561313,
PPP1R8	PPP1R8:NM_002713:chr1:+:22:81	chr1	+	28157346	28157406	28157346	28157406	1	28157346,	28157406,
PPP1R8	PPP1R8:NM_002713:chr1:+:533:823	chr1	+	28157857	28169752	28157857	28169752	4	28157857,28159266,28165209,28169696,	28157877,28159327,28165363,28169752,
SMPDL3B	SMPDL3B:NM_001009568:chr1:+:102:137	chr1	+	28261605	28261641	28261605	28261641	1	28261605,	28261641,
SESN2	SESN2:NM_031459:chr1:+:87:146	chr1	+	28586049	28586109	28586049	28586109	1	28586049,	28586109,
MED18	MED18:NM_001127350:chr1:+:154:183	chr1	+	28657138	28657168	28657138	28657168	1	28657138,	28657168,
PHACTR4	PHACTR4:NM_001048183:chr1:+:30:221	chr1	+	28696122	28696314	28696122	28696314	1	28696122,	28696314,
PHACTR4	PHACTR4:NM_023923:chr1:+:63:89	chr1	+	28764723	28764750	28764723	28764750	1	28764723,	28764750,
PHACTR4	PHACTR4:NM_023923:chr1:+:112:213	chr1	+	28764772	28764874	28764772	28764874	1	28764772,	28764874,
PHACTR4	PHACTR4:NM_023923:chr1:+:143:232	chr1	+	28764803	28764893	28764803	28764893	1	28764803,	28764893,
YTHDF2	YTHDF2:NM_001172828:chr1:+:135:167	chr1	+	29063586	29063619	29063586	29063619	1	29063586,	29063619,
EPB41	EPB41:NM_203342:chr1:+:127:612	chr1	+	29313949	29315885	29313949	29315885	2	29313949,29315867,	29314417,29315885,
EPB41	EPB41:NM_004437:chr1:+:131:595	chr1	+	29313970	29315885	29313970	29315885	2	29313970,29315867,	29314417,29315885,
ZCCHC17	ZCCHC17:NM_016505:chr1:+:26:94	chr1	+	31769867	31782904	31769867	31782904	2	31769867,31782890,	31769922,31782904,
ZCCHC17	ZCCHC17:NM_016505:chr1:+:111:125	chr1	+	31782920	31782935	31782920	31782935	1	31782920,	31782935,
SERINC2	SERINC2:NM_001199039:chr1:+:21:383	chr1	+	31886680	31887043	31886680	31887043	1	31886680,	31887043,
S100PBP	S100PBP:NM_022753:chr1:+:111:131	chr1	+	33283229	33283250	33283229	33283250	1	33283229,	33283250,
GJB3	GJB3:NM_024009:chr1:+:229:243	chr1	+	35247018	35247033	35247018	35247033	1	35247018,	35247033,
GJB3	GJB3:NM_024009:chr1:+:333:437	chr1	+	35247122	35247227	35247122	35247227	1	35247122,	35247227,
NCDN	NCDN:NM_001014839:chr1:+:89:118	chr1	+	36023481	36023783	36023481	36023783	2	36023481,36023756,	36023484,36023783,
NCDN	NCDN:NM_014284:chr1:+:160:342	chr1	+	36023552	36023735	36023552	36023735	1	36023552,	36023735,
NCDN	NCDN:NM_014284:chr1:+:358:390	chr1	+	36023750	36023783	36023750	36023783	1	36023750,	36023783,
EIF2C1	EIF2C1:NM_012199:chr1:+:25:153	chr1	+	36348834	36348963	36348834	36348963	1	36348834,	36348963,
EIF2C3	EIF2C3:NM_024852:chr1:+:341:436	chr1	+	36397023	36411365	36397023	36411365	2	36397023,36411292,	36397046,36411365,
EIF2C3	EIF2C3:NM_177422:chr1:+:441:539	chr1	+	36411369	36437628	36411369	36437628	2	36411369,36437624,	36411464,36437628,
MAP7D1	MAP7D1:NM_018067:chr1:+:132:185	chr1	+	36621934	36621988	36621934	36621988	1	36621934,	36621988,
THRAP3	THRAP3:NM_005119:chr1:+:96:191	chr1	+	36724988	36725084	36724988	36725084	1	36724988,	36725084,
THRAP3	THRAP3:NM_005119:chr1:+:172:198	chr1	+	36725064	36748139	36725064	36748139	2	36725064,36748133,	36725085,36748139,
ZC3H12A	ZC3H12A:NM_025079:chr1:+:75:146	chr1	+	37940193	37941094	37940193	37941094	2	37940193,37941059,	37940230,37941094,
KIAA0754	KIAA0754:NM_015038:chr1:+:115:246	chr1	+	39875290	39875422	39875290	39875422	1	39875290,	39875422,
KIAA0754	KIAA0754:NM_015038:chr1:+:536:664	chr1	+	39875711	39875840	39875711	39875840	1	39875711,	39875840,
ZMPSTE24	ZMPSTE24:NM_005857:chr1:+:90:161	chr1	+	40723811	40723883	40723811	40723883	1	40723811,	40723883,
ZNF643	ZNF643:NM_023070:chr1:+:52:81	chr1	+	40916388	40916418	40916388	40916418	1	40916388,	40916418,
NFYC	NFYC:NM_001142587:chr1:+:238:291	chr1	+	41157479	41157533	41157479	41157533	1	41157479,	41157533,
CTPS1	CTPS1:NM_001905:chr1:+:402:482	chr1	+	41445408	41445489	41445408	41445489	1	41445408,	41445489,
ERMAP	ERMAP:NM_001017922:chr1:+:39:158	chr1	+	43282814	43291303	43282814	43291303	2	43282814,43291293,	43282924,43291303,
PTPRF	PTPRF:NM_002840:chr1:+:187:270	chr1	+	43996733	44003924	43996733	44003924	2	43996733,44003868,	43996761,44003924,
ST3GAL3	ST3GAL3:NM_001270459:chr1:+:17:169	chr1	+	44173220	44201912	44173220	44201912	2	44173220,44201903,	44173364,44201912,
ARTN	ARTN:NM_057090:chr1:+:460:690	chr1	+	44399451	44399908	44399451	44399908	2	44399451,44399783,	44399557,44399908,
IPO13	IPO13:NM_014652:chr1:+:288:431	chr1	+	44412765	44412909	44412765	44412909	1	44412765,	44412909,
IPO13	IPO13:NM_014652:chr1:+:361:375	chr1	+	44412838	44412853	44412838	44412853	1	44412838,	44412853,
IPO13	IPO13:NM_014652:chr1:+:480:542	chr1	+	44412957	44413020	44412957	44413020	1	44412957,	44413020,
DPH2	DPH2:NM_001039589:chr1:+:39:116	chr1	+	44435691	44435769	44435691	44435769	1	44435691,	44435769,
ATP6V0B	ATP6V0B:NM_001039457:chr1:+:111:185	chr1	+	44440712	44441769	44440712	44441769	2	44440712,44441761,	44440779,44441769,
B4GALT2	B4GALT2:NM_003780:chr1:+:128:193	chr1	+	44445001	44445067	44445001	44445067	1	44445001,	44445067,
B4GALT2	B4GALT2:NM_003780:chr1:+:224:295	chr1	+	44445097	44445169	44445097	44445169	1	44445097,	44445169,
AKR1A1	AKR1A1:NM_006066:chr1:+:138:383	chr1	+	46016592	46018118	46016592	46018118	2	46016592,46018107,	46016827,46018118,
AKR1A1	AKR1A1:NM_001202413:chr1:+:144:200	chr1	+	46016687	46016744	46016687	46016744	1	46016687,	46016744,
AKR1A1	AKR1A1:NM_001202414:chr1:+:202:294	chr1	+	46016745	46018118	46016745	46018118	2	46016745,46018107,	46016827,46018118,
AKR1A1	AKR1A1:NM_001202414:chr1:+:331:390	chr1	+	46018154	46018214	46018154	46018214	1	46018154,	46018214,
AKR1A1	AKR1A1:NM_001202414:chr1:+:366:371	chr1	+	46018189	46018195	46018189	46018195	1	46018189,	46018195,
AKR1A1	AKR1A1:NM_001202414:chr1:+:368:379	chr1	+	46018191	46018203	46018191	46018203	1	46018191,	46018203,
TMEM69	TMEM69:NM_016486:chr1:+:28:114	chr1	+	46153874	46156659	46153874	46156659	2	46153874,46156645,	46153947,46156659,
TMEM69	TMEM69:NM_016486:chr1:+:105:146	chr1	+	46156649	46156691	46156649	46156691	1	46156649,	46156691,
TMEM69	TMEM69:NM_016486:chr1:+:140:187	chr1	+	46156684	46156732	46156684	46156732	1	46156684,	46156732,
RAD54L	RAD54L:NM_003579:chr1:+:110:586	chr1	+	46713476	46713953	46713476	46713953	1	46713476,	46713953,
RAD54L	RAD54L:NM_001142548:chr1:+:79:90	chr1	+	46714042	46714054	46714042	46714054	1	46714042,	46714054,
UQCRH	UQCRH:NM_006004:chr1:+:14:52	chr1	+	46769393	46769432	46769393	46769432	1	46769393,	46769432,
CDKN2C	CDKN2C:NM_001262:chr1:+:34:93	chr1	+	51434400	51434460	51434400	51434460	1	51434400,	51434460,
CDKN2C	CDKN2C:NM_001262:chr1:+:93:635	chr1	+	51434459	51435002	51434459	51435002	1	51434459,	51435002,
CDKN2C	CDKN2C:NM_001262:chr1:+:464:619	chr1	+	51434830	51434986	51434830	51434986	1	51434830,	51434986,
CDKN2C	CDKN2C:NM_001262:chr1:+:776:916	chr1	+	51435142	51435283	51435142	51435283	1	51435142,	51435283,
CDKN2C	CDKN2C:NM_001262:chr1:+:1129:1212	chr1	+	51435495	51436037	51435495	51436037	2	51435495,51436029,	51435571,51436037,
CDKN2C	CDKN2C:NM_078626:chr1:+:317:331	chr1	+	51435958	51435973	51435958	51435973	1	51435958,	51435973,
RNF11	RNF11:NM_014372:chr1:+:54:158	chr1	+	51701998	51702103	51701998	51702103	1	51701998,	51702103,
RNF11	RNF11:NM_014372:chr1:+:321:371	chr1	+	51702265	51702316	51702265	51702316	1	51702265,	51702316,
OSBPL9	OSBPL9:NM_148904:chr1:+:161:235	chr1	+	52195646	52195721	52195646	52195721	1	52195646,	52195721,
ZFYVE9	ZFYVE9:NM_004799:chr1:+:0:125	chr1	+	52608045	52682136	52608045	52682136	2	52608045,52682040,	52608075,52682136,
PRPF38A	PRPF38A:NM_032864:chr1:+:80:91	chr1	+	52870298	52870310	52870298	52870310	1	52870298,	52870310,
PRPF38A	PRPF38A:NM_032864:chr1:+:153:158	chr1	+	52870371	52870377	52870371	52870377	1	52870371,	52870377,
SCP2	SCP2:NM_001193617:chr1:+:168:251	chr1	+	53393068	53413695	53393068	53413695	2	53393068,53413680,	53393137,53413695,
TCEANC2	TCEANC2:NM_153035:chr1:+:0:158	chr1	+	54519273	54520054	54519273	54520054	2	54519273,54520053,	54519431,54520054,
MRPL37	MRPL37:NM_016491:chr1:+:35:61	chr1	+	54665874	54665901	54665874	54665901	1	54665874,	54665901,
KCNAB2	KCNAB2:NM_003636:chr1:+:397:474	chr1	+	6086469	6100618	6086469	6100618	2	6086469,6100576,	6086505,6100618,
KCNAB2	KCNAB2:NM_001199860:chr1:+:465:548	chr1	+	6094812	6100618	6094812	6100618	2	6094812,6100576,	6094854,6100618,
KCNAB2	KCNAB2:NM_001199861:chr1:+:521:532	chr1	+	6100606	6100618	6100606	6100618	1	6100606,	6100618,
NFIA	NFIA:NM_001134673:chr1:+:194:229	chr1	+	61548173	61548209	61548173	61548209	1	61548173,	61548209,
NFIA	NFIA:NM_001134673:chr1:+:271:285	chr1	+	61548250	61548265	61548250	61548265	1	61548250,	61548265,
NFIA	NFIA:NM_001134673:chr1:+:322:327	chr1	+	61548301	61548307	61548301	61548307	1	61548301,	61548307,
USP1	USP1:NM_001017416:chr1:+:150:176	chr1	+	62902124	62905482	62902124	62905482	2	62902124,62905469,	62902138,62905482,
USP1	USP1:NM_003368:chr1:+:451:474	chr1	+	62902833	62902857	62902833	62902857	1	62902833,	62902857,
USP1	USP1:NM_003368:chr1:+:681:701	chr1	+	62903063	62905482	62903063	62905482	2	62903063,62905469,	62903071,62905482,
ATG4C	ATG4C:NM_178221:chr1:+:20:136	chr1	+	63249796	63269406	63249796	63269406	2	63249796,63269389,	63249896,63269406,
ATG4C	ATG4C:NM_032852:chr1:+:20:184	chr1	+	63249796	63269406	63249796	63269406	2	63249796,63269389,	63249944,63269406,
ATG4C	ATG4C:NM_032852:chr1:+:198:233	chr1	+	63269419	63269455	63269419	63269455	1	63269419,	63269455,
ALG6	ALG6:NM_013339:chr1:+:174:239	chr1	+	63836517	63836583	63836517	63836583	1	63836517,	63836583,
AK4	AK4:NM_013410:chr1:+:105:110	chr1	+	65613954	65613960	65613954	65613960	1	65613954,	65613960,
LEPR	LEPR:NM_001003679:chr1:+:73:183	chr1	+	65886407	66031247	65886407	66031247	3	65886407,65890985,66031228,	65886423,65891061,66031247,
MIER1	MIER1:NM_001146110:chr1:+:134:304	chr1	+	67390711	67394572	67390711	67394572	3	67390711,67391824,67394569,	67390778,67391925,67394572,
MIER1	MIER1:NM_001077700:chr1:+:138:254	chr1	+	67390715	67391878	67390715	67391878	2	67390715,67391824,	67390778,67391878,
GADD45A	GADD45A:NM_001199741:chr1:+:221:226	chr1	+	68151080	68151086	68151080	68151086	1	68151080,	68151086,
TYW3	TYW3:NM_001162916:chr1:+:25:81	chr1	+	75198860	75198917	75198860	75198917	1	75198860,	75198917,
ACADM	ACADM:NM_000016:chr1:+:375:389	chr1	+	76190417	76190432	76190417	76190432	1	76190417,	76190432,
ST6GALNAC5	ST6GALNAC5:NM_030965:chr1:+:103:147	chr1	+	77333288	77333333	77333288	77333333	1	77333288,	77333333,
NEXN	NEXN:NM_001172309:chr1:+:32:289	chr1	+	78354231	78381784	78354231	78381784	2	78354231,78381739,	78354444,78381784,
DNAJB4	DNAJB4:NM_007034:chr1:+:89:142	chr1	+	78470724	78470778	78470724	78470778	1	78470724,	78470778,
PTGFR	PTGFR:NM_000959:chr1:+:128:235	chr1	+	78956855	78958398	78956855	78958398	2	78956855,78958356,	78956921,78958398,
PARK7	PARK7:NM_007262:chr1:+:20:85	chr1	+	8021733	8021799	8021733	8021799	1	8021733,	8021799,
PARK7	PARK7:NM_001123377:chr1:+:20:97	chr1	+	8021733	8022838	8021733	8022838	2	8021733,8022822,	8021795,8022838,
PARK7	PARK7:NM_001123377:chr1:+:75:89	chr1	+	8021788	8022830	8021788	8022830	2	8021788,8022822,	8021795,8022830,
PARK7	PARK7:NM_007262:chr1:+:142:147	chr1	+	8022824	8022830	8022824	8022830	1	8022824,	8022830,
LPHN2	LPHN2:NM_012302:chr1:+:118:141	chr1	+	82302571	82302595	82302571	82302595	1	82302571,	82302595,
CLCA2	CLCA2:NM_006536:chr1:+:114:137	chr1	+	86889882	86889906	86889882	86889906	1	86889882,	86889906,
SH3GLB1	SH3GLB1:NM_001206653:chr1:+:330:413	chr1	+	87170582	87185201	87170582	87185201	2	87170582,87185189,	87170654,87185201,
HS2ST1	HS2ST1:NM_001134492:chr1:+:358:366	chr1	+	87380692	87380701	87380692	87380701	1	87380692,	87380701,
PKN2	PKN2:NM_006256:chr1:+:167:184	chr1	+	89150088	89150106	89150088	89150106	1	89150088,	89150106,
LRRC8B	LRRC8B:NM_001134476:chr1:+:96:368	chr1	+	89990492	90034038	89990492	90034038	5	89990492,89992520,90015473,90033805,90033997,	89990581,89992545,90015530,90033866,90034038,
LRRC8B	LRRC8B:NM_001134476:chr1:+:384:446	chr1	+	90045150	90045213	90045150	90045213	1	90045150,	90045213,
LRRC8C	LRRC8C:NM_032270:chr1:+:125:172	chr1	+	90098768	90098816	90098768	90098816	1	90098768,	90098816,
LRRC8D	LRRC8D:NM_001134479:chr1:+:39:245	chr1	+	90286611	90286818	90286611	90286818	1	90286611,	90286818,
LRRC8D	LRRC8D:NM_001134479:chr1:+:47:298	chr1	+	90286619	90309217	90286619	90309217	2	90286619,90309196,	90286850,90309217,
LRRC8D	LRRC8D:NM_018103:chr1:+:229:285	chr1	+	90287708	90309217	90287708	90309217	2	90287708,90309196,	90287744,90309217,
LRRC8D	LRRC8D:NM_001134479:chr1:+:318:329	chr1	+	90309236	90309248	90309236	90309248	1	90309236,	90309248,
CDC7	CDC7:NM_001134420:chr1:+:216:221	chr1	+	91967230	91967236	91967230	91967236	1	91967230,	91967236,
MTF2	MTF2:NM_001164391:chr1:+:66:101	chr1	+	93544857	93544893	93544857	93544893	1	93544857,	93544893,
MTF2	MTF2:NM_001164391:chr1:+:261:287	chr1	+	93545052	93545079	93545052	93545079	1	93545052,	93545079,
MTF2	MTF2:NM_001164391:chr1:+:292:324	chr1	+	93545083	93575894	93545083	93575894	3	93545083,93575786,93575883,	93545088,93575803,93575894,
DR1	DR1:NM_001938:chr1:+:196:204	chr1	+	93811673	93811682	93811673	93811682	1	93811673,	93811682,
DR1	DR1:NM_001938:chr1:+:229:300	chr1	+	93811706	93811778	93811706	93811778	1	93811706,	93811778,
DR1	DR1:NM_001938:chr1:+:680:694	chr1	+	93812157	93812172	93812157	93812172	1	93812157,	93812172,
SPSB1	SPSB1:NM_025106:chr1:+:203:241	chr1	+	9415814	9415853	9415814	9415853	1	9415814,	9415853,
SPSB1	SPSB1:NM_025106:chr1:+:251:292	chr1	+	9415862	9415904	9415862	9415904	1	9415862,	9415904,
SPSB1	SPSB1:NM_025106:chr1:+:292:324	chr1	+	9415903	9415936	9415903	9415936	1	9415903,	9415936,
PIK3CD	PIK3CD:NM_005026:chr1:+:94:198	chr1	+	9751547	9770504	9751547	9770504	2	9751547,9770481,	9751629,9770504,
LZIC	LZIC:NM_032368:chr1:-:33:137	chr1	-	10002688	10002793	10002688	10002793	1	10002688,	10002793,
LZIC	LZIC:NM_032368:chr1:-:22:27	chr1	-	10002798	10002804	10002798	10002804	1	10002798,	10002804,
FRRS1	FRRS1:NM_001013660:chr1:-:517:549	chr1	-	100214504	100214537	100214504	100214537	1	100214504,	100214537,
EXTL2	EXTL2:NM_001033025:chr1:-:486:578	chr1	-	101354352	101360249	101354352	101360249	2	101354352,101360188,	101354384,101360249,
EXTL2	EXTL2:NM_001261442:chr1:-:486:569	chr1	-	101354397	101360249	101354397	101360249	2	101354397,101360188,	101354420,101360249,
EXTL2	EXTL2:NM_001033025:chr1:-:409:489	chr1	-	101360245	101360326	101360245	101360326	1	101360245,	101360326,
DPH5	DPH5:NM_001077394:chr1:-:70:90	chr1	-	101491271	101491292	101491271	101491292	1	101491271,	101491292,
WDR47	WDR47:NM_001142550:chr1:-:202:210	chr1	-	109584639	109584648	109584639	109584648	1	109584639,	109584648,
PSRC1	PSRC1:NM_001005290:chr1:-:100:111	chr1	-	109825347	109825690	109825347	109825690	2	109825347,109825684,	109825353,109825690,
PSMA5	PSMA5:NM_001199772:chr1:-:25:93	chr1	-	109968976	109969045	109968976	109969045	1	109968976,	109969045,
SLC16A4	SLC16A4:NM_001201546:chr1:-:100:123	chr1	-	110933580	110933604	110933580	110933604	1	110933580,	110933604,
LRIF1	LRIF1:NM_001006945:chr1:-:256:324	chr1	-	111492744	111506310	111492744	111506310	2	111492744,111506242,	111492745,111506310,
LRIF1	LRIF1:NM_001006945:chr1:-:144:254	chr1	-	111506311	111506422	111506311	111506422	1	111506311,	111506422,
DRAM2	DRAM2:NM_178454:chr1:-:199:219	chr1	-	111680167	111680188	111680167	111680188	1	111680167,	111680188,
AP4B1	AP4B1:NM_001253852:chr1:-:169:174	chr1	-	114447350	114447356	114447350	114447356	1	114447350,	114447356,
DENND2C	DENND2C:NM_001256404:chr1:-:583:654	chr1	-	115168652	115168724	115168652	115168724	1	115168652,	115168724,
DENND2C	DENND2C:NM_001256404:chr1:-:540:617	chr1	-	115168689	115168767	115168689	115168767	1	115168689,	115168767,
DENND2C	DENND2C:NM_198459:chr1:-:114:248	chr1	-	115168689	115212618	115168689	115212618	2	115168689,115212603,	115168809,115212618,
CSDE1	CSDE1:NM_001007553:chr1:-:347:445	chr1	-	115292508	115292607	115292508	115292607	1	115292508,	115292607,
CSDE1	CSDE1:NM_001007553:chr1:-:325:387	chr1	-	115292566	115292629	115292566	115292629	1	115292566,	115292629,
CSDE1	CSDE1:NM_001007553:chr1:-:156:236	chr1	-	115292717	115292798	115292717	115292798	1	115292717,	115292798,
CSDE1	CSDE1:NM_001007553:chr1:-:127:159	chr1	-	115292794	115292827	115292794	115292827	1	115292794,	115292827,
SIKE1	SIKE1:NM_001102396:chr1:-:3:44	chr1	-	115323263	115323305	115323263	115323305	1	115323263,	115323305,
NGF	NGF:NM_002506:chr1:-:69:113	chr1	-	115836290	115836335	115836290	115836335	1	115836290,	115836335,
SDF4	SDF4:NM_016176:chr1:-:90:104	chr1	-	1167342	1167357	1167342	1167357	1	1167342,	1167357,
SDF4	SDF4:NM_016176:chr1:-:25:51	chr1	-	1167395	1167422	1167395	1167422	1	1167395,	1167422,
FBXO2	FBXO2:NM_012168:chr1:-:201:248	chr1	-	11714639	11714687	11714639	11714687	1	11714639,	11714687,
IGSF3	IGSF3:NM_001007237:chr1:-:179:295	chr1	-	117209357	117209474	117209357	117209474	1	117209357,	117209474,
IGSF3	IGSF3:NM_001007237:chr1:-:24:32	chr1	-	117210281	117210290	117210281	117210290	1	117210281,	117210290,
GDAP2	GDAP2:NM_001135589:chr1:-:213:254	chr1	-	118463024	118472089	118463024	118472089	2	118463024,118472070,	118463047,118472089,
GDAP2	GDAP2:NM_001135589:chr1:-:159:191	chr1	-	118472110	118472143	118472110	118472143	1	118472110,	118472143,
UBE2J2	UBE2J2:NM_194458:chr1:-:189:323	chr1	-	1203237	1203372	1203237	1203372	1	1203237,	1203372,
AURKAIP1	AURKAIP1:NM_017900:chr1:-:25:30	chr1	-	1310787	1310793	1310787	1310793	1	1310787,	1310793,
MRPL20	MRPL20:NM_017971:chr1:-:38:67	chr1	-	1342625	1342655	1342625	1342655	1	1342625,	1342655,
FAM72D	FAM72D:NM_207418:chr1:-:339:371	chr1	-	143912771	143912804	143912771	143912804	1	143912771,	143912804,
PDE4DIP	PDE4DIP:NM_001002811:chr1:-:207:260	chr1	-	144931771	144931825	144931771	144931825	1	144931771,	144931825,
PDE4DIP	PDE4DIP:NM_001002811:chr1:-:41:91	chr1	-	144931940	144931991	144931940	144931991	1	144931940,	144931991,
PDE4DIP	PDE4DIP:NM_001198832:chr1:-:262:348	chr1	-	145039643	145039730	145039643	145039730	1	145039643,	145039730,
PDE4DIP	PDE4DIP:NM_022359:chr1:-:220:291	chr1	-	145075894	145075966	145075894	145075966	1	145075894,	145075966,
POLR3GL	POLR3GL:NM_032305:chr1:-:75:86	chr1	-	145460242	145460254	145460242	145460254	1	145460242,	145460254,
ACP6	ACP6:NM_016361:chr1:-:331:390	chr1	-	147142243	147142303	147142243	147142303	1	147142243,	147142303,
ACP6	ACP6:NM_016361:chr1:-:152:235	chr1	-	147142398	147142482	147142398	147142482	1	147142398,	147142482,
ACP6	ACP6:NM_016361:chr1:-:69:152	chr1	-	147142481	147142565	147142481	147142565	1	147142481,	147142565,
SV2A	SV2A:NM_014849:chr1:-:455:472	chr1	-	149885410	149885428	149885410	149885428	1	149885410,	149885428,
ANP32E	ANP32E:NM_001136478:chr1:-:93:179	chr1	-	150208324	150208411	150208324	150208411	1	150208324,	150208411,
GOLPH3L	GOLPH3L:NM_018178:chr1:-:127:198	chr1	-	150669473	150669545	150669473	150669545	1	150669473,	150669545,
CDC42SE1	CDC42SE1:NM_001038707:chr1:-:433:549	chr1	-	151028226	151028343	151028226	151028343	1	151028226,	151028343,
CDC42SE1	CDC42SE1:NM_020239:chr1:-:99:251	chr1	-	151028388	151032026	151028388	151032026	2	151028388,151031954,	151028469,151032026,
CDC42SE1	CDC42SE1:NM_001038707:chr1:-:272:331	chr1	-	151028444	151029161	151028444	151029161	2	151028444,151029126,	151028469,151029161,
CDC42SE1	CDC42SE1:NM_020239:chr1:-:154:195	chr1	-	151028444	151031971	151028444	151031971	2	151028444,151031954,	151028469,151031971,
CDC42SE1	CDC42SE1:NM_001038707:chr1:-:171:266	chr1	-	151029166	151029262	151029166	151029262	1	151029166,	151029262,
CDC42SE1	CDC42SE1:NM_001038707:chr1:-:154:174	chr1	-	151029258	151031971	151029258	151031971	2	151029258,151031954,	151029262,151031971,
LYSMD1	LYSMD1:NM_212551:chr1:-:265:321	chr1	-	151138048	151138105	151138048	151138105	1	151138048,	151138105,
LYSMD1	LYSMD1:NM_212551:chr1:-:18:95	chr1	-	151138274	151138352	151138274	151138352	1	151138274,	151138352,
LYSMD1	LYSMD1:NM_001136543:chr1:-:39:149	chr1	-	151138274	151138385	151138274	151138385	1	151138274,	151138385,
VPS72	VPS72:NM_001271087:chr1:-:20:55	chr1	-	151162633	151162669	151162633	151162669	1	151162633,	151162669,
PI4KB	PI4KB:NM_001198773:chr1:-:606:740	chr1	-	151297241	151297376	151297241	151297376	1	151297241,	151297376,
PI4KB	PI4KB:NM_001198773:chr1:-:295:324	chr1	-	151299808	151299838	151299808	151299838	1	151299808,	151299838,
PI4KB	PI4KB:NM_001198773:chr1:-:8:28	chr1	-	151300104	151300125	151300104	151300125	1	151300104,	151300125,
RFX5	RFX5:NM_000449:chr1:-:125:181	chr1	-	151318983	151319040	151318983	151319040	1	151318983,	151319040,
S100A6	S100A6:NM_014624:chr1:-:123:137	chr1	-	153508579	153508594	153508579	153508594	1	153508579,	153508594,
S100A6	S100A6:NM_014624:chr1:-:8:70	chr1	-	153508646	153508709	153508646	153508709	1	153508646,	153508709,
S100A4	S100A4:NM_019554:chr1:-:65:103	chr1	-	153517284	153517983	153517284	153517983	2	153517284,153517945,	153517285,153517983,
S100A2	S100A2:NM_005978:chr1:-:158:223	chr1	-	153538082	153538148	153538082	153538148	1	153538082,	153538148,
S100A2	S100A2:NM_005978:chr1:-:21:161	chr1	-	153538144	153538285	153538144	153538285	1	153538144,	153538285,
S100A2	S100A2:NM_005978:chr1:-:89:97	chr1	-	153538208	153538217	153538208	153538217	1	153538208,	153538217,
S100A14	S100A14:NM_020672:chr1:-:41:73	chr1	-	153588376	153588409	153588376	153588409	1	153588376,	153588409,
S100A13	S100A13:NM_001024210:chr1:-:472:504	chr1	-	153598947	153598980	153598947	153598980	1	153598947,	153598980,
S100A13	S100A13:NM_001024213:chr1:-:96:122	chr1	-	153598984	153599428	153598984	153599428	2	153598984,153599426,	153599009,153599428,
S100A13	S100A13:NM_001024212:chr1:-:14:154	chr1	-	153598984	153599730	153598984	153599730	2	153598984,153599614,	153599009,153599730,
S100A13	S100A13:NM_001024211:chr1:-:121:183	chr1	-	153598984	153599996	153598984	153599996	2	153598984,153599958,	153599009,153599996,
S100A13	S100A13:NM_001024210:chr1:-:429:467	chr1	-	153598984	153603500	153598984	153603500	2	153598984,153603486,	153599009,153603500,
S100A13	S100A13:NM_001024210:chr1:-:53:199	chr1	-	153604651	153606515	153604651	153606515	2	153604651,153606433,	153604716,153606515,
ILF2	ILF2:NM_001267809:chr1:-:106:237	chr1	-	153641028	153643398	153641028	153643398	4	153641028,153642311,153642646,153643393,	153641052,153642354,153642706,153643398,
ILF2	ILF2:NM_001267809:chr1:-:43:99	chr1	-	153643404	153643461	153643404	153643461	1	153643404,	153643461,
JTB	JTB:NM_006694:chr1:-:650:685	chr1	-	153949765	153949801	153949765	153949801	1	153949765,	153949801,
JTB	JTB:NM_006694:chr1:-:482:565	chr1	-	153949885	153949969	153949885	153949969	1	153949885,	153949969,
JTB	JTB:NM_006694:chr1:-:405:446	chr1	-	153950004	153950046	153950004	153950046	1	153950004,	153950046,
C1orf43	C1orf43:NM_001098616:chr1:-:280:336	chr1	-	154192936	154192993	154192936	154192993	1	154192936,	154192993,
C1orf43	C1orf43:NM_001098616:chr1:-:237:275	chr1	-	154192997	154193036	154192997	154193036	1	154192997,	154193036,
PMVK	PMVK:NM_006556:chr1:-:260:274	chr1	-	154909209	154909224	154909209	154909224	1	154909209,	154909224,
PMVK	PMVK:NM_006556:chr1:-:182:238	chr1	-	154909245	154909302	154909245	154909302	1	154909245,	154909302,
PMVK	PMVK:NM_006556:chr1:-:149:157	chr1	-	154909326	154909335	154909326	154909335	1	154909326,	154909335,
PYGO2	PYGO2:NM_138300:chr1:-:144:188	chr1	-	154934069	154934114	154934069	154934114	1	154934069,	154934114,
SHC1	SHC1:NM_001130040:chr1:-:27:53	chr1	-	154943169	154943196	154943169	154943196	1	154943169,	154943196,
SHC1	SHC1:NM_001130041:chr1:-:170:184	chr1	-	154946774	154946789	154946774	154946789	1	154946774,	154946789,
SHC1	SHC1:NM_001130041:chr1:-:152:163	chr1	-	154946795	154946807	154946795	154946807	1	154946795,	154946807,
GBA	GBA:NM_001171811:chr1:-:238:378	chr1	-	155209846	155214415	155209846	155214415	2	155209846,155214296,	155209868,155214415,
FAM189B	FAM189B:NM_001267608:chr1:-:140:175	chr1	-	155225098	155225134	155225098	155225134	1	155225098,	155225134,
SCAMP3	SCAMP3:NM_005698:chr1:-:84:140	chr1	-	155232035	155232092	155232035	155232092	1	155232035,	155232092,
ASH1L	ASH1L:NM_018489:chr1:-:387:440	chr1	-	155491349	155491403	155491349	155491403	1	155491349,	155491403,
YY1AP1	YY1AP1:NM_139121:chr1:-:320:373	chr1	-	155646508	155648973	155646508	155648973	2	155646508,155648948,	155646537,155648973,
YY1AP1	YY1AP1:NM_139121:chr1:-:64:210	chr1	-	155649082	155650227	155649082	155650227	3	155649082,155649199,155650206,	155649104,155649303,155650227,
YY1AP1	YY1AP1:NM_018253:chr1:-:270:323	chr1	-	155649766	155650227	155649766	155650227	2	155649766,155650206,	155649799,155650227,
YY1AP1	YY1AP1:NM_001198901:chr1:-:111:119	chr1	-	155650226	155650235	155650226	155650235	1	155650226,	155650235,
GON4L	GON4L:NM_001037533:chr1:-:24:47	chr1	-	155823572	155823596	155823572	155823596	1	155823572,	155823596,
SMG5	SMG5:NM_015327:chr1:-:28:120	chr1	-	156252499	156252592	156252499	156252592	1	156252499,	156252592,
C1orf85	C1orf85:NM_001256609:chr1:-:44:190	chr1	-	156265289	156265436	156265289	156265436	1	156265289,	156265436,
MEF2D	MEF2D:NM_001271629:chr1:-:134:148	chr1	-	156453149	156453164	156453149	156453164	1	156453149,	156453164,
MEF2D	MEF2D:NM_001271629:chr1:-:105:113	chr1	-	156453184	156453193	156453184	156453193	1	156453184,	156453193,
GPATCH4	GPATCH4:NM_182679:chr1:-:73:114	chr1	-	156568860	156571206	156568860	156571206	2	156568860,156571200,	156568896,156571206,
GPATCH4	GPATCH4:NM_015590:chr1:-:20:76	chr1	-	156571202	156571259	156571202	156571259	1	156571202,	156571259,
ISG20L2	ISG20L2:NM_030980:chr1:-:164:220	chr1	-	156697484	156697541	156697484	156697541	1	156697484,	156697541,
MRPL24	MRPL24:NM_024540:chr1:-:43:51	chr1	-	156710871	156710880	156710871	156710880	1	156710871,	156710880,
SH2D2A	SH2D2A:NM_001161441:chr1:-:60:74	chr1	-	156786565	156786580	156786565	156786580	1	156786565,	156786580,
ARHGEF11	ARHGEF11:NM_014784:chr1:-:857:904	chr1	-	157014257	157014305	157014257	157014305	1	157014257,	157014305,
ARHGEF11	ARHGEF11:NM_014784:chr1:-:634:660	chr1	-	157014501	157014528	157014501	157014528	1	157014501,	157014528,
ARHGEF11	ARHGEF11:NM_014784:chr1:-:17:145	chr1	-	157015016	157015145	157015016	157015145	1	157015016,	157015145,
PIGM	PIGM:NM_145167:chr1:-:105:200	chr1	-	160001582	160001678	160001582	160001678	1	160001582,	160001678,
DCAF8	DCAF8:NM_015726:chr1:-:103:171	chr1	-	160231088	160232247	160231088	160232247	2	160231088,160232238,	160231148,160232247,
DCAF8	DCAF8:NM_015726:chr1:-:51:122	chr1	-	160231137	160232299	160231137	160232299	2	160231137,160232238,	160231148,160232299,
COPA	COPA:NM_001098398:chr1:-:348:368	chr1	-	160312985	160313006	160312985	160313006	1	160312985,	160313006,
F11R	F11R:NM_016946:chr1:-:217:264	chr1	-	160990868	160990916	160990868	160990916	1	160990868,	160990916,
USF1	USF1:NM_207005:chr1:-:195:341	chr1	-	161012003	161013065	161012003	161013065	4	161012003,161012375,161012622,161013057,	161012007,161012460,161012672,161013065,
USF1	USF1:NM_007122:chr1:-:40:198	chr1	-	161013061	161015717	161013061	161015717	2	161013061,161015647,	161013150,161015717,
USF1	USF1:NM_007122:chr1:-:126:131	chr1	-	161013128	161013134	161013128	161013134	1	161013128,	161013134,
USF1	USF1:NM_007122:chr1:-:3:29	chr1	-	161015727	161015754	161015727	161015754	1	161015727,	161015754,
DEDD	DEDD:NM_001039712:chr1:-:101:163	chr1	-	161094261	161100612	161094261	161100612	2	161094261,161100604,	161094316,161100612,
DEDD	DEDD:NM_001039711:chr1:-:112:192	chr1	-	161094261	161102366	161094261	161102366	2	161094261,161102340,	161094316,161102366,
DEDD	DEDD:NM_032998:chr1:-:112:225	chr1	-	161094261	161102366	161094261	161102366	3	161094261,161100604,161102340,	161094316,161100637,161102366,
B4GALT3	B4GALT3:NM_001199873:chr1:-:620:685	chr1	-	161146229	161146295	161146229	161146295	1	161146229,	161146295,
B4GALT3	B4GALT3:NM_001199873:chr1:-:576:620	chr1	-	161146294	161146339	161146294	161146339	1	161146294,	161146339,
B4GALT3	B4GALT3:NM_001199873:chr1:-:444:524	chr1	-	161147233	161147314	161147233	161147314	1	161147233,	161147314,
ADAMTS4	ADAMTS4:NM_005099:chr1:-:305:367	chr1	-	161168477	161168540	161168477	161168540	1	161168477,	161168540,
ADAMTS4	ADAMTS4:NM_005099:chr1:-:33:260	chr1	-	161168584	161168812	161168584	161168812	1	161168584,	161168812,
ZBTB17	ZBTB17:NM_001242884:chr1:-:143:235	chr1	-	16299534	16302484	16299534	16302484	2	16299534,16302477,	16299620,16302484,
TMCO1	TMCO1:NM_001256165:chr1:-:18:269	chr1	-	165737889	165738141	165737889	165738141	1	165737889,	165738141,
FBXO42	FBXO42:NM_018994:chr1:-:39:77	chr1	-	16678870	16678909	16678870	16678909	1	16678870,	16678909,
SLC35E2	SLC35E2:NM_001199787:chr1:-:338:589	chr1	-	1675793	1676045	1675793	1676045	1	1675793,	1676045,
SLC35E2	SLC35E2:NM_001199787:chr1:-:244:336	chr1	-	1676046	1677194	1676046	1677194	2	1676046,1677162,	1676107,1677194,
GPR161	GPR161:NM_001267609:chr1:-:643:675	chr1	-	168074090	168074123	168074090	168074123	1	168074090,	168074123,
NBPF1	NBPF1:NM_017940:chr1:-:406:624	chr1	-	16920008	16935018	16920008	16935018	4	16920008,16921086,16921425,16935002,	16920062,16921156,16921504,16935018,
NME7	NME7:NM_013330:chr1:-:171:233	chr1	-	169336952	169337015	169336952	169337015	1	169336952,	169337015,
NBPF1	NBPF1:NM_017940:chr1:-:289:396	chr1	-	16935027	16935135	16935027	16935135	1	16935027,	16935135,
NBPF1	NBPF1:NM_017940:chr1:-:113:148	chr1	-	16939833	16939869	16939833	16939869	1	16939833,	16939869,
NBPF1	NBPF1:NM_017940:chr1:-:56:112	chr1	-	16939869	16939926	16939869	16939926	1	16939869,	16939926,
METTL18	METTL18:NM_033418:chr1:-:174:215	chr1	-	169762928	169762970	169762928	169762970	1	169762928,	169762970,
KIFAP3	KIFAP3:NM_001204514:chr1:-:271:636	chr1	-	170010934	170043608	170010934	170043608	4	170010934,170015852,170024445,170043576,	170010981,170016007,170024577,170043608,
NADK	NADK:NM_023018:chr1:-:145:150	chr1	-	1709758	1709764	1709758	1709764	1	1709758,	1709764,
NADK	NADK:NM_023018:chr1:-:58:96	chr1	-	1709812	1709851	1709812	1709851	1	1709812,	1709851,
PIGC	PIGC:NM_002642:chr1:-:227:265	chr1	-	172411830	172411869	172411830	172411869	1	172411830,	172411869,
PIGC	PIGC:NM_002642:chr1:-:144:173	chr1	-	172411922	172411952	172411922	172411952	1	172411922,	172411952,
CENPL	CENPL:NM_001127181:chr1:-:546:596	chr1	-	173780443	173793113	173780443	173793113	2	173780443,173793063,	173780444,173793113,
CENPL	CENPL:NM_001171182:chr1:-:136:153	chr1	-	173793116	173793134	173793116	173793134	1	173793116,	173793134,
CENPL	CENPL:NM_001127181:chr1:-:498:542	chr1	-	173793116	173793279	173793116	173793279	2	173793116,173793275,	173793157,173793279,
CENPL	CENPL:NM_001127181:chr1:-:36:158	chr1	-	173793618	173793741	173793618	173793741	1	173793618,	173793741,
SDHB	SDHB:NM_003000:chr1:-:83:136	chr1	-	17380528	17380582	17380528	17380582	1	17380528,	17380582,
KIAA0040	KIAA0040:NM_001162893:chr1:-:575:655	chr1	-	175130187	175130268	175130187	175130268	1	175130187,	175130268,
KIAA0040	KIAA0040:NM_001162893:chr1:-:408:488	chr1	-	175135769	175135850	175135769	175135850	1	175135769,	175135850,
KIAA0040	KIAA0040:NM_001162893:chr1:-:330:362	chr1	-	175146768	175146801	175146768	175146801	1	175146768,	175146801,
GNB1	GNB1:NM_002074:chr1:-:307:315	chr1	-	1770629	1770638	1770629	1770638	1	1770629,	1770638,
GNB1	GNB1:NM_002074:chr1:-:278:310	chr1	-	1770634	1770667	1770634	1770667	1	1770634,	1770667,
TOR1AIP2	TOR1AIP2:NM_001199260:chr1:-:699:773	chr1	-	179821840	179821915	179821840	179821915	1	179821840,	179821915,
TOR1AIP2	TOR1AIP2:NM_001199260:chr1:-:679:711	chr1	-	179821902	179821935	179821902	179821935	1	179821902,	179821935,
TOR1AIP2	TOR1AIP2:NM_022347:chr1:-:849:920	chr1	-	179834317	179834389	179834317	179834389	1	179834317,	179834389,
TOR1AIP2	TOR1AIP2:NM_022347:chr1:-:692:742	chr1	-	179834495	179834546	179834495	179834546	1	179834495,	179834546,
TOR1AIP2	TOR1AIP2:NM_022347:chr1:-:629:679	chr1	-	179834558	179834609	179834558	179834609	1	179834558,	179834609,
TOR1AIP2	TOR1AIP2:NM_001199260:chr1:-:571:606	chr1	-	179834631	179834667	179834631	179834667	1	179834631,	179834667,
TOR1AIP2	TOR1AIP2:NM_001199260:chr1:-:542:571	chr1	-	179834666	179834696	179834666	179834696	1	179834666,	179834696,
TOR1AIP2	TOR1AIP2:NM_001199260:chr1:-:421:555	chr1	-	179834682	179834817	179834682	179834817	1	179834682,	179834817,
TOR1AIP2	TOR1AIP2:NM_001199260:chr1:-:379:417	chr1	-	179834820	179834859	179834820	179834859	1	179834820,	179834859,
TOR1AIP2	TOR1AIP2:NM_001199260:chr1:-:320:382	chr1	-	179834855	179834918	179834855	179834918	1	179834855,	179834918,
TOR1AIP2	TOR1AIP2:NM_001199260:chr1:-:306:320	chr1	-	179834917	179834932	179834917	179834932	1	179834917,	179834932,
TOR1AIP2	TOR1AIP2:NM_001199260:chr1:-:281:316	chr1	-	179834921	179834957	179834921	179834957	1	179834921,	179834957,
TOR1AIP2	TOR1AIP2:NM_001199260:chr1:-:251:256	chr1	-	179834981	179834987	179834981	179834987	1	179834981,	179834987,
STX6	STX6:NM_005819:chr1:-:84:134	chr1	-	180991911	180991962	180991911	180991962	1	180991911,	180991962,
GNB1	GNB1:NM_002074:chr1:-:23:40	chr1	-	1822485	1822503	1822485	1822503	1	1822485,	1822503,
GLUL	GLUL:NM_001033056:chr1:-:84:227	chr1	-	182360311	182360455	182360311	182360455	1	182360311,	182360455,
ARPC5	ARPC5:NM_001270439:chr1:-:221:238	chr1	-	183604837	183604855	183604837	183604855	1	183604837,	183604855,
EDEM3	EDEM3:NM_025191:chr1:-:208:231	chr1	-	184723809	184723833	184723809	184723833	1	184723809,	184723833,
EDEM3	EDEM3:NM_025191:chr1:-:76:180	chr1	-	184723860	184723965	184723860	184723965	1	184723860,	184723965,
TRMT1L	TRMT1L:NM_030934:chr1:-:190:225	chr1	-	185125890	185125926	185125890	185125926	1	185125890,	185125926,
IVNS1ABP	IVNS1ABP:NM_006469:chr1:-:587:604	chr1	-	185280226	185280244	185280226	185280244	1	185280226,	185280244,
IVNS1ABP	IVNS1ABP:NM_006469:chr1:-:344:418	chr1	-	185280412	185286117	185280412	185286117	2	185280412,185286084,	185280454,185286117,
IVNS1ABP	IVNS1ABP:NM_006469:chr1:-:150:257	chr1	-	185286203	185286311	185286203	185286311	1	185286203,	185286311,
DENND1B	DENND1B:NM_001195215:chr1:-:21:212	chr1	-	197744410	197744602	197744410	197744602	1	197744410,	197744602,
KIF14	KIF14:NM_014875:chr1:-:359:397	chr1	-	200587892	200587931	200587892	200587931	1	200587892,	200587931,
KIF14	KIF14:NM_014875:chr1:-:344:355	chr1	-	200587934	200587946	200587934	200587946	1	200587934,	200587946,
KIF14	KIF14:NM_014875:chr1:-:23:328	chr1	-	200587961	200589839	200587961	200589839	2	200587961,200589538,	200587966,200589839,
TMCO4	TMCO4:NM_181719:chr1:-:179:226	chr1	-	20113525	20113573	20113525	20113573	1	20113525,	20113573,
LAD1	LAD1:NM_005558:chr1:-:147:152	chr1	-	201368516	201368522	201368516	201368522	1	201368516,	201368522,
LAD1	LAD1:NM_005558:chr1:-:52:135	chr1	-	201368533	201368617	201368533	201368617	1	201368533,	201368617,
PHLDA3	PHLDA3:NM_012396:chr1:-:21:143	chr1	-	201438155	201438278	201438155	201438278	1	201438155,	201438278,
ADIPOR1	ADIPOR1:NM_015999:chr1:-:164:169	chr1	-	202927354	202927360	202927354	202927360	1	202927354,	202927360,
PLEKHA6	PLEKHA6:NM_014935:chr1:-:241:273	chr1	-	204243899	204243932	204243899	204243932	1	204243899,	204243932,
PPP1R15B	PPP1R15B:NM_032833:chr1:-:174:329	chr1	-	204380614	204380770	204380614	204380770	1	204380614,	204380770,
PPP1R15B	PPP1R15B:NM_032833:chr1:-:126:152	chr1	-	204380791	204380818	204380791	204380818	1	204380791,	204380818,
ELK4	ELK4:NM_001973:chr1:-:1057:1167	chr1	-	205600832	205600943	205600832	205600943	1	205600832,	205600943,
SLC45A3	SLC45A3:NM_033102:chr1:-:207:305	chr1	-	205633817	205633916	205633817	205633916	1	205633817,	205633916,
NUCKS1	NUCKS1:NM_022731:chr1:-:35:58	chr1	-	205719313	205719337	205719313	205719337	1	205719313,	205719337,
RAB7L1	RAB7L1:NM_001135662:chr1:-:131:175	chr1	-	205744147	205744192	205744147	205744192	1	205744147,	205744192,
SLC41A1	SLC41A1:NM_173854:chr1:-:687:791	chr1	-	205779649	205779754	205779649	205779754	1	205779649,	205779754,
SLC41A1	SLC41A1:NM_173854:chr1:-:520:645	chr1	-	205779795	205779921	205779795	205779921	1	205779795,	205779921,
SLC41A1	SLC41A1:NM_173854:chr1:-:501:566	chr1	-	205779874	205779940	205779874	205779940	1	205779874,	205779940,
SLC41A1	SLC41A1:NM_173854:chr1:-:419:535	chr1	-	205779905	205780022	205779905	205780022	1	205779905,	205780022,
SLC41A1	SLC41A1:NM_173854:chr1:-:355:435	chr1	-	205780005	205780086	205780005	205780086	1	205780005,	205780086,
SLC41A1	SLC41A1:NM_173854:chr1:-:137:280	chr1	-	205780160	205782024	205780160	205782024	2	205780160,205781935,	205780215,205782024,
SLC41A1	SLC41A1:NM_173854:chr1:-:43:48	chr1	-	205782112	205782118	205782112	205782118	1	205782112,	205782118,
EIF2D	EIF2D:NM_001201478:chr1:-:109:162	chr1	-	206785741	206785795	206785741	206785795	1	206785741,	206785795,
C1orf116	C1orf116:NM_001083924:chr1:-:29:49	chr1	-	207206051	207206072	207206051	207206072	1	207206051,	207206072,
CAMK2N1	CAMK2N1:NM_018584:chr1:-:582:587	chr1	-	20812140	20812146	20812140	20812146	1	20812140,	20812146,
PLXNA2	PLXNA2:NM_025179:chr1:-:682:687	chr1	-	208391337	208391343	208391337	208391343	1	208391337,	208391343,
PLXNA2	PLXNA2:NM_025179:chr1:-:532:570	chr1	-	208417094	208417133	208417094	208417133	1	208417094,	208417133,
PLXNA2	PLXNA2:NM_025179:chr1:-:281:406	chr1	-	208417258	208417384	208417258	208417384	1	208417258,	208417384,
PLXNA2	PLXNA2:NM_025179:chr1:-:226:237	chr1	-	208417427	208417439	208417427	208417439	1	208417427,	208417439,
LAMB3	LAMB3:NM_000228:chr1:-:76:141	chr1	-	209824291	209825744	209824291	209825744	2	209824291,209825713,	209824326,209825744,
LAMB3	LAMB3:NM_001017402:chr1:-:126:152	chr1	-	209824526	209824553	209824526	209824553	1	209824526,	209824553,
C1orf74	C1orf74:NM_152485:chr1:-:195:224	chr1	-	209956997	209957027	209956997	209957027	1	209956997,	209957027,
C1orf74	C1orf74:NM_152485:chr1:-:99:149	chr1	-	209957740	209957791	209957740	209957791	1	209957740,	209957791,
IRF6	IRF6:NM_001206696:chr1:-:111:272	chr1	-	209969853	209979409	209969853	209979409	2	209969853,209979291,	209969897,209979409,
IRF6	IRF6:NM_001206696:chr1:-:74:118	chr1	-	209979401	209979446	209979401	209979446	1	209979401,	209979446,
HP1BP3	HP1BP3:NM_016287:chr1:-:57:110	chr1	-	21106962	21107016	21106962	21107016	1	21106962,	21107016,
HP1BP3	HP1BP3:NM_016287:chr1:-:41:88	chr1	-	21106984	21107032	21106984	21107032	1	21106984,	21107032,
INTS7	INTS7:NM_001199809:chr1:-:159:176	chr1	-	212208825	212208843	212208825	212208843	1	212208825,	212208843,
ANGEL2	ANGEL2:NM_144567:chr1:-:22:102	chr1	-	213189065	213189146	213189065	213189146	1	213189065,	213189146,
PTPN14	PTPN14:NM_005401:chr1:-:525:593	chr1	-	214638205	214638274	214638205	214638274	1	214638205,	214638274,
PTPN14	PTPN14:NM_005401:chr1:-:489:494	chr1	-	214724529	214724535	214724529	214724535	1	214724529,	214724535,
EIF4G3	EIF4G3:NM_001198801:chr1:-:29:55	chr1	-	21503325	21503352	21503325	21503352	1	21503325,	21503352,
GPATCH2	GPATCH2:NM_018040:chr1:-:3:65	chr1	-	217804343	217804406	217804343	217804406	1	217804343,	217804406,
USP48	USP48:NM_001032730:chr1:-:88:108	chr1	-	22109579	22109600	22109579	22109600	1	22109579,	22109600,
DUSP10	DUSP10:NM_007207:chr1:-:108:152	chr1	-	221915363	221915408	221915363	221915408	1	221915363,	221915408,
DUSP10	DUSP10:NM_007207:chr1:-:98:121	chr1	-	221915394	221915418	221915394	221915418	1	221915394,	221915418,
TAF1A	TAF1A:NM_139352:chr1:-:209:352	chr1	-	222753191	222761905	222753191	222761905	2	222753191,222761784,	222753214,222761905,
AIDA	AIDA:NM_022831:chr1:-:118:153	chr1	-	222885710	222885746	222885710	222885746	1	222885710,	222885746,
AIDA	AIDA:NM_022831:chr1:-:53:118	chr1	-	222885745	222885811	222885745	222885811	1	222885745,	222885811,
TP53BP2	TP53BP2:NM_005426:chr1:-:292:522	chr1	-	224005983	224033382	224005983	224033382	3	224005983,224008921,224033355,	224006039,224009069,224033382,
NVL	NVL:NM_001243146:chr1:-:62:154	chr1	-	224505596	224517829	224505596	224517829	2	224505596,224517772,	224505632,224517829,
ENAH	ENAH:NM_001008493:chr1:-:303:311	chr1	-	225840533	225840542	225840533	225840542	1	225840533,	225840542,
TMEM63A	TMEM63A:NM_014698:chr1:-:472:558	chr1	-	226066968	226067055	226066968	226067055	1	226066968,	226067055,
PARP1	PARP1:NM_001618:chr1:-:129:164	chr1	-	226595636	226595672	226595636	226595672	1	226595636,	226595672,
ITPKB	ITPKB:NM_002221:chr1:-:95:100	chr1	-	226926775	226926781	226926775	226926781	1	226926775,	226926781,
ITPKB	ITPKB:NM_002221:chr1:-:8:58	chr1	-	226926817	226926868	226926817	226926868	1	226926817,	226926868,
CDC42BPA	CDC42BPA:NM_003607:chr1:-:448:582	chr1	-	227505243	227505378	227505243	227505378	1	227505243,	227505378,
CDC42BPA	CDC42BPA:NM_003607:chr1:-:383:508	chr1	-	227505317	227505443	227505317	227505443	1	227505317,	227505443,
CDC42BPA	CDC42BPA:NM_003607:chr1:-:205:258	chr1	-	227505567	227505621	227505567	227505621	1	227505567,	227505621,
CDC42BPA	CDC42BPA:NM_003607:chr1:-:82:108	chr1	-	227505717	227505744	227505717	227505744	1	227505717,	227505744,
MRPL55	MRPL55:NM_181441:chr1:-:198:215	chr1	-	228295967	228295985	228295967	228295985	1	228295967,	228295985,
MRPL55	MRPL55:NM_181454:chr1:-:92:208	chr1	-	228295967	228296682	228295967	228296682	3	228295967,228296137,228296655,	228296019,228296175,228296682,
MRPL55	MRPL55:NM_181455:chr1:-:92:211	chr1	-	228295967	228296682	228295967	228296682	3	228295967,228296137,228296655,	228296022,228296175,228296682,
MRPL55	MRPL55:NM_181462:chr1:-:204:254	chr1	-	228295995	228296682	228295995	228296682	2	228295995,228296655,	228296019,228296682,
MRPL55	MRPL55:NM_181462:chr1:-:22:168	chr1	-	228296717	228296991	228296717	228296991	2	228296717,228296849,	228296722,228296991,
EXOC8	EXOC8:NM_175876:chr1:-:56:73	chr1	-	231473504	231473522	231473504	231473522	1	231473504,	231473522,
EGLN1	EGLN1:NM_022051:chr1:-:3040:3051	chr1	-	231557738	231557750	231557738	231557750	1	231557738,	231557750,
EGLN1	EGLN1:NM_022051:chr1:-:2933:2944	chr1	-	231557845	231557857	231557845	231557857	1	231557845,	231557857,
EGLN1	EGLN1:NM_022051:chr1:-:2777:2824	chr1	-	231557965	231558013	231557965	231558013	1	231557965,	231558013,
EGLN1	EGLN1:NM_022051:chr1:-:2385:2447	chr1	-	231558342	231558405	231558342	231558405	1	231558342,	231558405,
EGLN1	EGLN1:NM_022051:chr1:-:2304:2336	chr1	-	231558453	231558486	231558453	231558486	1	231558453,	231558486,
PCNXL2	PCNXL2:NM_014801:chr1:-:89:157	chr1	-	233431301	233431370	233431301	233431370	1	233431301,	233431370,
LUZP1	LUZP1:NM_001142546:chr1:-:283:315	chr1	-	23420756	23420789	23420756	23420789	1	23420756,	23420789,
LUZP1	LUZP1:NM_001142546:chr1:-:203:253	chr1	-	23420818	23420869	23420818	23420869	1	23420818,	23420869,
LUZP1	LUZP1:NM_001142546:chr1:-:125:199	chr1	-	23420872	23435588	23420872	23435588	2	23420872,23435514,	23420873,23435588,
LUZP1	LUZP1:NM_033631:chr1:-:171:194	chr1	-	23435584	23435608	23435584	23435608	1	23435584,	23435608,
LUZP1	LUZP1:NM_001142546:chr1:-:63:128	chr1	-	23435584	23495288	23435584	23495288	2	23435584,23495258,	23435620,23495288,
TOMM20	TOMM20:NM_014765:chr1:-:215:220	chr1	-	235292035	235292041	235292035	235292041	1	235292035,	235292041,
ARID4B	ARID4B:NM_016374:chr1:-:153:458	chr1	-	235490273	235491379	235490273	235491379	2	235490273,235491083,	235490283,235491379,
GNG4	GNG4:NM_001098722:chr1:-:251:355	chr1	-	235758787	235813042	235758787	235813042	2	235758787,235812961,	235758811,235813042,
LYST	LYST:NM_000081:chr1:-:127:135	chr1	-	235996909	235996918	235996909	235996918	1	235996909,	235996918,
HNRNPR	HNRNPR:NM_001102397:chr1:-:147:158	chr1	-	23665092	23670706	23665092	23670706	2	23665092,23670703,	23665101,23670706,
HEATR1	HEATR1:NM_018072:chr1:-:59:76	chr1	-	236767764	236767782	236767764	236767782	1	236767764,	236767782,
OPN3	OPN3:NM_014322:chr1:-:38:109	chr1	-	241803591	241803663	241803591	241803663	1	241803591,	241803663,
CEP170	CEP170:NM_001042404:chr1:-:368:376	chr1	-	243388613	243388622	243388613	243388622	1	243388613,	243388622,
CEP170	CEP170:NM_001042404:chr1:-:283:363	chr1	-	243418344	243418425	243418344	243418425	1	243418344,	243418425,
CEP170	CEP170:NM_001042404:chr1:-:175:198	chr1	-	243418509	243418533	243418509	243418533	1	243418509,	243418533,
HNRNPU	HNRNPU:NM_004501:chr1:-:157:168	chr1	-	245027658	245027670	245027658	245027670	1	245027658,	245027670,
TFB2M	TFB2M:NM_022366:chr1:-:41:79	chr1	-	246729485	246729524	246729485	246729524	1	246729485,	246729524,
STPG1	STPG1:NM_001199014:chr1:-:167:271	chr1	-	24718522	24727878	24718522	24727878	2	24718522,24727808,	24718557,24727878,
ZNF670	ZNF670:NM_001204220:chr1:-:74:187	chr1	-	247241927	247242041	247241927	247242041	1	247241927,	247242041,
STPG1	STPG1:NM_001199012:chr1:-:201:209	chr1	-	24727923	24727932	24727923	24727932	1	24727923,	24727932,
ZNF496	ZNF496:NM_032752:chr1:-:136:372	chr1	-	247493322	247494909	247493322	247494909	2	247493322,247494733,	247493383,247494909,
ZNF496	ZNF496:NM_032752:chr1:-:233:310	chr1	-	247494734	247494812	247494734	247494812	1	247494734,	247494812,
SH3BP5L	SH3BP5L:NM_030645:chr1:-:505:528	chr1	-	249119157	249119181	249119157	249119181	1	249119157,	249119181,
SH3BP5L	SH3BP5L:NM_030645:chr1:-:218:394	chr1	-	249119291	249119468	249119291	249119468	1	249119291,	249119468,
SH3BP5L	SH3BP5L:NM_030645:chr1:-:4:114	chr1	-	249120039	249120150	249120039	249120150	1	249120039,	249120150,
GPN2	GPN2:NM_018066:chr1:-:145:252	chr1	-	27216616	27216724	27216616	27216724	1	27216616,	27216724,
C1orf172	C1orf172:NM_152365:chr1:-:81:89	chr1	-	27278874	27278883	27278874	27278883	1	27278874,	27278883,
SLC9A1	SLC9A1:NM_003047:chr1:-:657:674	chr1	-	27480946	27480964	27480946	27480964	1	27480946,	27480964,
SLC9A1	SLC9A1:NM_003047:chr1:-:328:387	chr1	-	27481233	27481293	27481233	27481293	1	27481233,	27481293,
SLC9A1	SLC9A1:NM_003047:chr1:-:11:361	chr1	-	27481259	27481610	27481259	27481610	1	27481259,	27481610,
WASF2	WASF2:NM_001201404:chr1:-:168:212	chr1	-	27755412	27816510	27755412	27816510	2	27755412,27816496,	27755443,27816510,
WASF2	WASF2:NM_001201404:chr1:-:22:69	chr1	-	27816608	27816656	27816608	27816656	1	27816608,	27816656,
AHDC1	AHDC1:NM_001029882:chr1:-:236:385	chr1	-	27885244	27885394	27885244	27885394	1	27885244,	27885394,
AHDC1	AHDC1:NM_001029882:chr1:-:84:251	chr1	-	27885378	27930059	27885378	27930059	2	27885378,27929907,	27885394,27930059,
IFI6	IFI6:NM_002038:chr1:-:61:96	chr1	-	27995851	27998663	27995851	27998663	2	27995851,27998633,	27995857,27998663,
RPA2	RPA2:NM_002946:chr1:-:10:93	chr1	-	28241142	28241226	28241142	28241226	1	28241142,	28241226,
EYA3	EYA3:NM_001990:chr1:-:7:120	chr1	-	28384598	28415141	28384598	28415141	2	28384598,28415034,	28384605,28415141,
PTAFR	PTAFR:NM_000952:chr1:-:283:372	chr1	-	28477550	28503172	28477550	28503172	2	28477550,28503102,	28477570,28503172,
PTAFR	PTAFR:NM_001164722:chr1:-:142:234	chr1	-	28477550	28520305	28477550	28520305	2	28477550,28520232,	28477570,28520305,
PTAFR	PTAFR:NM_000952:chr1:-:264:332	chr1	-	28503122	28503191	28503122	28503191	1	28503122,	28503191,
PTAFR	PTAFR:NM_001164721:chr1:-:142:276	chr1	-	28503122	28520305	28503122	28520305	2	28503122,28520232,	28503184,28520305,
TAF12	TAF12:NM_001135218:chr1:-:442:501	chr1	-	28948613	28948673	28948613	28948673	1	28948613,	28948673,
TAF12	TAF12:NM_001135218:chr1:-:77:88	chr1	-	28969515	28969527	28969515	28969527	1	28969515,	28969527,
MECR	MECR:NM_001024732:chr1:-:36:257	chr1	-	29543278	29557418	29543278	29557418	2	29543278,29557242,	29543324,29557418,
PUM1	PUM1:NM_001020658:chr1:-:11:25	chr1	-	31538538	31538553	31538538	31538553	1	31538538,	31538553,
PTP4A2	PTP4A2:NM_001195100:chr1:-:496:531	chr1	-	32384727	32384763	32384727	32384763	1	32384727,	32384763,
PTP4A2	PTP4A2:NM_001195100:chr1:-:311:433	chr1	-	32384825	32384948	32384825	32384948	1	32384825,	32384948,
PTP4A2	PTP4A2:NM_001195100:chr1:-:210:239	chr1	-	32385019	32385049	32385019	32385049	1	32385019,	32385049,
PTP4A2	PTP4A2:NM_001195100:chr1:-:92:169	chr1	-	32385089	32385167	32385089	32385167	1	32385089,	32385167,
PTP4A2	PTP4A2:NM_001195100:chr1:-:30:95	chr1	-	32385163	32385229	32385163	32385229	1	32385163,	32385229,
PTP4A2	PTP4A2:NM_080391:chr1:-:377:496	chr1	-	32385163	32403611	32385163	32403611	2	32385163,32403587,	32385259,32403611,
PTP4A2	PTP4A2:NM_080391:chr1:-:23:331	chr1	-	32403656	32403965	32403656	32403965	1	32403656,	32403965,
YARS	YARS:NM_003680:chr1:-:690:761	chr1	-	33282871	33282943	33282871	33282943	1	33282871,	33282943,
YARS	YARS:NM_003680:chr1:-:700:732	chr1	-	33282900	33282933	33282900	33282933	1	33282900,	33282933,
YARS	YARS:NM_003680:chr1:-:686:703	chr1	-	33282929	33282947	33282929	33282947	1	33282929,	33282947,
TRIM62	TRIM62:NM_018207:chr1:-:166:513	chr1	-	33647157	33647505	33647157	33647505	1	33647157,	33647505,
ZMYM6	ZMYM6:NM_007167:chr1:-:96:218	chr1	-	35496249	35497473	35496249	35497473	2	35496249,35497415,	35496314,35497473,
KIAA0319L	KIAA0319L:NM_024874:chr1:-:167:223	chr1	-	36022813	36022870	36022813	36022870	1	36022813,	36022870,
PSMB2	PSMB2:NM_001199779:chr1:-:40:57	chr1	-	36107094	36107112	36107094	36107112	1	36107094,	36107112,
C1orf216	C1orf216:NM_152374:chr1:-:157:423	chr1	-	36184366	36184633	36184366	36184633	1	36184366,	36184633,
TRAPPC3	TRAPPC3:NM_001270896:chr1:-:136:195	chr1	-	36614919	36614979	36614919	36614979	1	36614919,	36614979,
LSM10	LSM10:NM_032881:chr1:-:24:80	chr1	-	36863412	36863469	36863412	36863469	1	36863412,	36863469,
CEP104	CEP104:NM_014704:chr1:-:41:241	chr1	-	3773555	3773756	3773555	3773756	1	3773555,	3773756,
MTF1	MTF1:NM_005955:chr1:-:32:127	chr1	-	38323343	38325260	38323343	38325260	2	38323343,38325202,	38323381,38325260,
PABPC4	PABPC4:NM_001135653:chr1:-:439:591	chr1	-	40041929	40042082	40041929	40042082	1	40041929,	40042082,
PABPC4	PABPC4:NM_001135653:chr1:-:34:135	chr1	-	40042385	40042487	40042385	40042487	1	40042385,	40042487,
CITED4	CITED4:NM_133467:chr1:-:81:179	chr1	-	41327838	41327937	41327838	41327937	1	41327838,	41327937,
SCMH1	SCMH1:NM_001172218:chr1:-:202:315	chr1	-	41625597	41651805	41625597	41651805	4	41625597,41626546,41627035,41651792,	41625605,41626570,41627104,41651805,
SCMH1	SCMH1:NM_001172218:chr1:-:85:156	chr1	-	41651850	41651922	41651850	41651922	1	41651850,	41651922,
SCMH1	SCMH1:NM_001172218:chr1:-:35:55	chr1	-	41707759	41707780	41707759	41707780	1	41707759,	41707780,
CCDC23	CCDC23:NM_199342:chr1:-:28:213	chr1	-	43282236	43283031	43282236	43283031	2	43282236,43282860,	43282251,43283031,
EBNA1BP2	EBNA1BP2:NM_006824:chr1:-:141:173	chr1	-	43637812	43637845	43637812	43637845	1	43637812,	43637845,
SLC6A9	SLC6A9:NM_001024845:chr1:-:184:207	chr1	-	44490013	44496980	44490013	44496980	2	44490013,44496977,	44490034,44496980,
ERI3	ERI3:NM_024066:chr1:-:41:169	chr1	-	44820769	44820898	44820769	44820898	1	44820769,	44820898,
EIF2B3	EIF2B3:NM_001166588:chr1:-:186:224	chr1	-	45452169	45452208	45452169	45452208	1	45452169,	45452208,
PRDX1	PRDX1:NM_002574:chr1:-:222:266	chr1	-	45987343	45987388	45987343	45987388	1	45987343,	45987388,
PRDX1	PRDX1:NM_002574:chr1:-:69:113	chr1	-	45987496	45987541	45987496	45987541	1	45987496,	45987541,
GPBP1L1	GPBP1L1:NM_021639:chr1:-:1315:1341	chr1	-	46124778	46124805	46124778	46124805	1	46124778,	46124805,
GPBP1L1	GPBP1L1:NM_021639:chr1:-:992:1000	chr1	-	46126160	46126169	46126160	46126169	1	46126160,	46126169,
GPBP1L1	GPBP1L1:NM_021639:chr1:-:941:991	chr1	-	46126169	46126220	46126169	46126220	1	46126169,	46126220,
GPBP1L1	GPBP1L1:NM_021639:chr1:-:898:912	chr1	-	46126248	46126263	46126248	46126263	1	46126248,	46126263,
GPBP1L1	GPBP1L1:NM_021639:chr1:-:806:832	chr1	-	46126328	46126355	46126328	46126355	1	46126328,	46126355,
GPBP1L1	GPBP1L1:NM_021639:chr1:-:744:824	chr1	-	46126336	46126417	46126336	46126417	1	46126336,	46126417,
GPBP1L1	GPBP1L1:NM_021639:chr1:-:785:805	chr1	-	46126355	46126376	46126355	46126376	1	46126355,	46126376,
GPBP1L1	GPBP1L1:NM_021639:chr1:-:757:774	chr1	-	46126386	46126404	46126386	46126404	1	46126386,	46126404,
GPBP1L1	GPBP1L1:NM_021639:chr1:-:689:736	chr1	-	46126424	46126472	46126424	46126472	1	46126424,	46126472,
GPBP1L1	GPBP1L1:NM_021639:chr1:-:676:699	chr1	-	46126461	46126485	46126461	46126485	1	46126461,	46126485,
GPBP1L1	GPBP1L1:NM_021639:chr1:-:597:623	chr1	-	46126537	46126564	46126537	46126564	1	46126537,	46126564,
GPBP1L1	GPBP1L1:NM_021639:chr1:-:503:511	chr1	-	46126649	46126658	46126649	46126658	1	46126649,	46126658,
GPBP1L1	GPBP1L1:NM_021639:chr1:-:310:324	chr1	-	46126836	46126851	46126836	46126851	1	46126836,	46126851,
GPBP1L1	GPBP1L1:NM_021639:chr1:-:245:268	chr1	-	46126892	46151266	46126892	46151266	2	46126892,46151247,	46126897,46151266,
GPBP1L1	GPBP1L1:NM_021639:chr1:-:123:137	chr1	-	46152164	46152179	46152164	46152179	1	46152164,	46152179,
IPP	IPP:NM_001145349:chr1:-:231:254	chr1	-	46212095	46212119	46212095	46212119	1	46212095,	46212119,
POMGNT1	POMGNT1:NM_001243766:chr1:-:613:636	chr1	-	46663507	46663531	46663507	46663531	1	46663507,	46663531,
POMGNT1	POMGNT1:NM_017739:chr1:-:30:71	chr1	-	46664049	46664091	46664049	46664091	1	46664049,	46664091,
MKNK1	MKNK1:NM_001135553:chr1:-:116:184	chr1	-	47059877	47059946	47059877	47059946	1	47059877,	47059946,
MKNK1	MKNK1:NM_001135553:chr1:-:129:140	chr1	-	47059921	47059933	47059921	47059933	1	47059921,	47059933,
ATPAF1	ATPAF1:NM_001256418:chr1:-:230:367	chr1	-	47129568	47131320	47129568	47131320	3	47129568,47130927,47131318,	47129595,47131036,47131320,
KIAA0494	KIAA0494:NM_014774:chr1:-:757:762	chr1	-	47183973	47183979	47183973	47183979	1	47183973,	47183979,
KIAA0494	KIAA0494:NM_014774:chr1:-:243:407	chr1	-	47184328	47184493	47184328	47184493	1	47184328,	47184493,
KIAA0494	KIAA0494:NM_014774:chr1:-:86:109	chr1	-	47184626	47184650	47184626	47184650	1	47184626,	47184650,
FAF1	FAF1:NM_007051:chr1:-:271:282	chr1	-	51425653	51425665	51425653	51425665	1	51425653,	51425665,
FAF1	FAF1:NM_007051:chr1:-:110:256	chr1	-	51425679	51425826	51425679	51425826	1	51425679,	51425826,
NRD1	NRD1:NM_001101662:chr1:-:295:321	chr1	-	52344287	52344314	52344287	52344314	1	52344287,	52344314,
KTI12	KTI12:NM_138417:chr1:-:20:34	chr1	-	52499437	52499452	52499437	52499452	1	52499437,	52499452,
TXNDC12	TXNDC12:NM_015913:chr1:-:480:662	chr1	-	52521180	52521363	52521180	52521363	1	52521180,	52521363,
ZCCHC11	ZCCHC11:NM_001009881:chr1:-:42:143	chr1	-	53018618	53018720	53018618	53018720	1	53018618,	53018720,
ZCCHC11	ZCCHC11:NM_001009881:chr1:-:17:34	chr1	-	53018727	53018745	53018727	53018745	1	53018727,	53018745,
TMEM48	TMEM48:NM_001168551:chr1:-:145:276	chr1	-	54303948	54304080	54303948	54304080	1	54303948,	54304080,
YIPF1	YIPF1:NM_018982:chr1:-:102:212	chr1	-	54355025	54355136	54355025	54355136	1	54355025,	54355136,
TMEM59	TMEM59:NM_004872:chr1:-:227:235	chr1	-	54518875	54518884	54518875	54518884	1	54518875,	54518884,
TMEM59	TMEM59:NM_004872:chr1:-:83:115	chr1	-	54518995	54519028	54518995	54519028	1	54518995,	54519028,
TMEM59	TMEM59:NM_004872:chr1:-:27:74	chr1	-	54519036	54519084	54519036	54519084	1	54519036,	54519084,
CYB5RL	CYB5RL:NM_001031672:chr1:-:219:320	chr1	-	54661288	54662043	54661288	54662043	2	54661288,54662041,	54661388,54662043,
SSBP3	SSBP3:NM_001009955:chr1:-:190:219	chr1	-	54871872	54871902	54871872	54871902	1	54871872,	54871902,
PPAP2B	PPAP2B:NM_003713:chr1:-:136:342	chr1	-	57044914	57045121	57044914	57045121	1	57044914,	57045121,
JUN	JUN:NM_002228:chr1:-:1023:1031	chr1	-	59248753	59248762	59248753	59248762	1	59248753,	59248762,
JUN	JUN:NM_002228:chr1:-:847:918	chr1	-	59248866	59248938	59248866	59248938	1	59248866,	59248938,
JUN	JUN:NM_002228:chr1:-:718:771	chr1	-	59249013	59249067	59249013	59249067	1	59249013,	59249067,
JUN	JUN:NM_002228:chr1:-:108:170	chr1	-	59249614	59249677	59249614	59249677	1	59249614,	59249677,
JAK1	JAK1:NM_002227:chr1:-:233:244	chr1	-	65351951	65351963	65351951	65351963	1	65351951,	65351963,
JAK1	JAK1:NM_002227:chr1:-:75:182	chr1	-	65352013	65432112	65352013	65432112	2	65352013,65432015,	65352024,65432112,
PLEKHG5	PLEKHG5:NM_020631:chr1:-:43:132	chr1	-	6537650	6551718	6537650	6551718	2	6537650,6551696,	6537718,6551718,
PLEKHG5	PLEKHG5:NM_001042664:chr1:-:8:94	chr1	-	6550545	6550632	6550545	6550632	1	6550545,	6550632,
GNG12	GNG12:NM_018841:chr1:-:176:202	chr1	-	68173371	68243143	68173371	68243143	2	68173371,68243140,	68173395,68243143,
GNG12	GNG12:NM_018841:chr1:-:156:179	chr1	-	68173394	68243163	68173394	68243163	2	68173394,68243140,	68173395,68243163,
DEPDC1	DEPDC1:NM_001114120:chr1:-:89:109	chr1	-	68962689	68962710	68962689	68962710	1	68962689,	68962710,
ANKRD13C	ANKRD13C:NM_030816:chr1:-:175:246	chr1	-	70820170	70820242	70820170	70820242	1	70820170,	70820242,
ANKRD13C	ANKRD13C:NM_030816:chr1:-:25:51	chr1	-	70820365	70820392	70820365	70820392	1	70820365,	70820392,
ZZZ3	ZZZ3:NM_015534:chr1:-:402:461	chr1	-	78099053	78105156	78099053	78105156	2	78099053,78105133,	78099090,78105156,
ZZZ3	ZZZ3:NM_015534:chr1:-:330:356	chr1	-	78105201	78105228	78105201	78105228	1	78105201,	78105228,
ZZZ3	ZZZ3:NM_015534:chr1:-:299:322	chr1	-	78105235	78105259	78105235	78105259	1	78105235,	78105259,
ZZZ3	ZZZ3:NM_015534:chr1:-:150:188	chr1	-	78107225	78107264	78107225	78107264	1	78107225,	78107264,
ZZZ3	ZZZ3:NM_015534:chr1:-:133:144	chr1	-	78107269	78107281	78107269	78107281	1	78107269,	78107281,
ZZZ3	ZZZ3:NM_015534:chr1:-:18:107	chr1	-	78107306	78148325	78107306	78148325	2	78107306,78148269,	78107340,78148325,
USP33	USP33:NM_015017:chr1:-:195:245	chr1	-	78211275	78225369	78211275	78225369	2	78211275,78225327,	78211284,78225369,
ERRFI1	ERRFI1:NM_018948:chr1:-:134:196	chr1	-	8075731	8086259	8075731	8086259	2	8075731,8086217,	8075752,8086259,
SSX2IP	SSX2IP:NM_001166293:chr1:-:190:201	chr1	-	85136976	85136988	85136976	85136988	1	85136976,	85136988,
DDAH1	DDAH1:NM_001134445:chr1:-:362:433	chr1	-	85961910	86043684	85961910	86043684	2	85961910,86043666,	85961964,86043684,
DDAH1	DDAH1:NM_001134445:chr1:-:176:220	chr1	-	86043825	86043870	86043825	86043870	1	86043825,	86043870,
DDAH1	DDAH1:NM_001134445:chr1:-:35:172	chr1	-	86043873	86044011	86043873	86044011	1	86043873,	86044011,
ODF2L	ODF2L:NM_001007022:chr1:-:313:357	chr1	-	86852714	86852759	86852714	86852759	1	86852714,	86852759,
ODF2L	ODF2L:NM_001007022:chr1:-:149:154	chr1	-	86861870	86861876	86861870	86861876	1	86861870,	86861876,
SEP15	SEP15:NM_004261:chr1:-:176:274	chr1	-	87379832	87379931	87379832	87379931	1	87379832,	87379931,
SEP15	SEP15:NM_004261:chr1:-:157:189	chr1	-	87379917	87379950	87379917	87379950	1	87379917,	87379950,
ENO1	ENO1:NM_001428:chr1:-:66:284	chr1	-	8938866	8939085	8938866	8939085	1	8938866,	8939085,
RBMXL1	RBMXL1:NM_001162536:chr1:-:540:581	chr1	-	89449643	89449685	89449643	89449685	1	89449643,	89449685,
RBMXL1	RBMXL1:NM_001162536:chr1:-:377:547	chr1	-	89449677	89454033	89449677	89454033	2	89449677,89453934,	89449749,89454033,
GBP3	GBP3:NM_018284:chr1:-:160:168	chr1	-	89488380	89488389	89488380	89488389	1	89488380,	89488389,
GBP3	GBP3:NM_018284:chr1:-:93:104	chr1	-	89488444	89488456	89488444	89488456	1	89488444,	89488456,
GBP1	GBP1:NM_002053:chr1:-:171:185	chr1	-	89530857	89530872	89530857	89530872	1	89530857,	89530872,
GBP1	GBP1:NM_002053:chr1:-:86:130	chr1	-	89530912	89530957	89530912	89530957	1	89530912,	89530957,
TGFBR3	TGFBR3:NM_001195683:chr1:-:273:281	chr1	-	92351554	92351563	92351554	92351563	1	92351554,	92351563,
BCAR3	BCAR3:NM_001261408:chr1:-:134:283	chr1	-	94140491	94311215	94140491	94311215	3	94140491,94171647,94311122,	94140497,94171698,94311215,
BCAR3	BCAR3:NM_003567:chr1:-:114:182	chr1	-	94147211	94147280	94147211	94147280	1	94147211,	94147280,
ARHGAP29	ARHGAP29:NM_004815:chr1:-:246:290	chr1	-	94703016	94703061	94703016	94703061	1	94703016,	94703061,
CLSTN1	CLSTN1:NM_001009566:chr1:-:565:687	chr1	-	9883862	9883985	9883862	9883985	1	9883862,	9883985,
ENTPD7	ENTPD7:NM_020354:chr10:+:99:149	chr10	+	101419634	101419685	101419634	101419685	1	101419634,	101419685,
ABCC2	ABCC2:NM_000392:chr10:+:2:40	chr10	+	101542464	101542503	101542464	101542503	1	101542464,	101542503,
ABCC2	ABCC2:NM_000392:chr10:+:34:102	chr10	+	101542496	101542565	101542496	101542565	1	101542496,	101542565,
SCD	SCD:NM_005063:chr10:+:235:258	chr10	+	102107006	102107030	102107006	102107030	1	102107006,	102107030,
C10orf2	C10orf2:NM_001163812:chr10:+:31:81	chr10	+	102747323	102747374	102747323	102747374	1	102747323,	102747374,
C10orf2	C10orf2:NM_001163813:chr10:+:31:114	chr10	+	102747323	102749437	102747323	102749437	2	102747323,102749400,	102747370,102749437,
C10orf2	C10orf2:NM_001163812:chr10:+:154:225	chr10	+	102747446	102747518	102747446	102747518	1	102747446,	102747518,
C10orf2	C10orf2:NM_001163812:chr10:+:288:356	chr10	+	102747580	102747649	102747580	102747649	1	102747580,	102747649,
C10orf2	C10orf2:NM_001163812:chr10:+:489:599	chr10	+	102747781	102747892	102747781	102747892	1	102747781,	102747892,
SFXN3	SFXN3:NM_030971:chr10:+:387:440	chr10	+	102792161	102792215	102792161	102792215	1	102792161,	102792215,
GBF1	GBF1:NM_001199378:chr10:+:100:126	chr10	+	104005354	104005381	104005354	104005381	1	104005354,	104005381,
GBF1	GBF1:NM_001199378:chr10:+:227:256	chr10	+	104005481	104005511	104005481	104005511	1	104005481,	104005511,
NFKB2	NFKB2:NM_001077494:chr10:+:225:257	chr10	+	104155674	104155707	104155674	104155707	1	104155674,	104155707,
FBXL15	FBXL15:NM_024326:chr10:+:1070:1111	chr10	+	104180640	104180682	104180640	104180682	1	104180640,	104180682,
FBXL15	FBXL15:NM_024326:chr10:+:1130:1219	chr10	+	104180700	104180790	104180700	104180790	1	104180700,	104180790,
TMEM180	TMEM180:NM_024789:chr10:+:7:138	chr10	+	104221176	104225839	104221176	104225839	2	104221176,104225738,	104221207,104225839,
TMEM180	TMEM180:NM_024789:chr10:+:152:202	chr10	+	104228719	104228770	104228719	104228770	1	104228719,	104228770,
PDCD4	PDCD4:NM_001199492:chr10:+:183:230	chr10	+	112631735	112635730	112631735	112635730	2	112631735,112635723,	112631776,112635730,
PDCD4	PDCD4:NM_001199492:chr10:+:253:279	chr10	+	112635752	112635779	112635752	112635779	1	112635752,	112635779,
PDCD4	PDCD4:NM_145341:chr10:+:286:342	chr10	+	112635785	112636441	112635785	112636441	2	112635785,112636427,	112635828,112636441,
SHOC2	SHOC2:NM_007373:chr10:+:91:123	chr10	+	112679391	112723891	112679391	112723891	2	112679391,112723882,	112679415,112723891,
SHOC2	SHOC2:NM_001269039:chr10:+:47:70	chr10	+	112723929	112723953	112723929	112723953	1	112723929,	112723953,
SHOC2	SHOC2:NM_001269039:chr10:+:61:144	chr10	+	112723943	112724027	112723943	112724027	1	112723943,	112724027,
NHLRC2	NHLRC2:NM_198514:chr10:+:84:92	chr10	+	115614474	115614483	115614474	115614483	1	115614474,	115614483,
NHLRC2	NHLRC2:NM_198514:chr10:+:144:173	chr10	+	115614534	115614564	115614534	115614564	1	115614534,	115614564,
PNLIPRP3	PNLIPRP3:NM_001011709:chr10:+:77:82	chr10	+	118187500	118187506	118187500	118187506	1	118187500,	118187506,
C10orf47	C10orf47:NM_153256:chr10:+:93:125	chr10	+	11894015	11894048	11894015	11894048	1	11894015,	11894048,
PLEKHA1	PLEKHA1:NM_001195608:chr10:+:159:188	chr10	+	124151858	124151888	124151858	124151888	1	124151858,	124151888,
OPTN	OPTN:NM_001008211:chr10:+:175:192	chr10	+	13142256	13142274	13142256	13142274	1	13142256,	13142274,
MCM10	MCM10:NM_018518:chr10:+:10:123	chr10	+	13203563	13206198	13203563	13206198	2	13203563,13206127,	13203606,13206198,
RPP38	RPP38:NM_001097590:chr10:+:4:222	chr10	+	15139182	15139401	15139182	15139401	1	15139182,	15139401,
RPP38	RPP38:NM_001265601:chr10:+:358:570	chr10	+	15139536	15139749	15139536	15139749	1	15139536,	15139749,
PTER	PTER:NM_001001484:chr10:+:57:260	chr10	+	16478998	16526357	16478998	16526357	3	16478998,16479355,16526335,	16479046,16479489,16526357,
ZMYND11	ZMYND11:NM_006624:chr10:+:316:333	chr10	+	180720	225945	180720	225945	2	180720,225933,	180726,225945,
ZMYND11	ZMYND11:NM_001202465:chr10:+:400:420	chr10	+	180823	225945	180823	225945	2	180823,225933,	180832,225945,
ZMYND11	ZMYND11:NM_001202464:chr10:+:73:87	chr10	+	181496	225945	181496	225945	2	181496,225933,	181499,225945,
PLXDC2	PLXDC2:NM_032812:chr10:+:49:252	chr10	+	20105420	20105624	20105420	20105624	1	20105420,	20105624,
MLLT10	MLLT10:NM_001195627:chr10:+:298:330	chr10	+	21823398	21823431	21823398	21823431	1	21823398,	21823431,
BMI1	BMI1:NM_005180:chr10:+:9:17	chr10	+	22610147	22610156	22610147	22610156	1	22610147,	22610156,
BMI1	BMI1:NM_005180:chr10:+:25:114	chr10	+	22610163	22610253	22610163	22610253	1	22610163,	22610253,
BMI1	BMI1:NM_005180:chr10:+:308:361	chr10	+	22610446	22610500	22610446	22610500	1	22610446,	22610500,
BMI1	BMI1:NM_005180:chr10:+:388:420	chr10	+	22610526	22610559	22610526	22610559	1	22610526,	22610559,
APBB1IP	APBB1IP:NM_019043:chr10:+:67:96	chr10	+	26727332	26727362	26727332	26727362	1	26727332,	26727362,
MASTL	MASTL:NM_001172303:chr10:+:177:368	chr10	+	27443929	27444121	27443929	27444121	1	27443929,	27444121,
BAMBI	BAMBI:NM_012342:chr10:+:60:116	chr10	+	28966483	28966540	28966483	28966540	1	28966483,	28966540,
BAMBI	BAMBI:NM_012342:chr10:+:250:288	chr10	+	28966673	28966712	28966673	28966712	1	28966673,	28966712,
MAP3K8	MAP3K8:NM_005204:chr10:+:71:394	chr10	+	30723020	30726141	30723020	30726141	2	30723020,30726104,	30723307,30726141,
MAP3K8	MAP3K8:NM_005204:chr10:+:358:432	chr10	+	30726104	30726179	30726104	30726179	1	30726104,	30726179,
MAP3K8	MAP3K8:NM_005204:chr10:+:480:551	chr10	+	30726226	30726298	30726226	30726298	1	30726226,	30726298,
CREM	CREM:NM_001267562:chr10:+:357:497	chr10	+	35437299	35467820	35437299	35467820	2	35437299,35467799,	35437419,35467820,
CREM	CREM:NM_001267570:chr10:+:5:73	chr10	+	35484834	35484903	35484834	35484903	1	35484834,	35484903,
ZNF37A	ZNF37A:NM_001007094:chr10:+:59:142	chr10	+	38383322	38383406	38383322	38383406	1	38383322,	38383406,
ZNF37A	ZNF37A:NM_001007094:chr10:+:70:105	chr10	+	38383333	38383369	38383333	38383369	1	38383333,	38383369,
ZNF37A	ZNF37A:NM_001007094:chr10:+:629:778	chr10	+	38384465	38384725	38384465	38384725	2	38384465,38384671,	38384561,38384725,
CSGALNACT2	CSGALNACT2:NM_018590:chr10:+:57:101	chr10	+	43633990	43650364	43633990	43650364	2	43633990,43650344,	43634015,43650364,
CSGALNACT2	CSGALNACT2:NM_018590:chr10:+:101:145	chr10	+	43650363	43650408	43650363	43650408	1	43650363,	43650408,
CSGALNACT2	CSGALNACT2:NM_018590:chr10:+:189:215	chr10	+	43650451	43650478	43650451	43650478	1	43650451,	43650478,
ZNF22	ZNF22:NM_006963:chr10:+:137:163	chr10	+	45496409	45498737	45496409	45498737	2	45496409,45498727,	45496426,45498737,
ZNF22	ZNF22:NM_006963:chr10:+:182:193	chr10	+	45498755	45498767	45498755	45498767	1	45498755,	45498767,
ANXA8L2	ANXA8L2:NM_001630:chr10:+:145:186	chr10	+	47747064	47747106	47747064	47747106	1	47747064,	47747106,
NCOA4	NCOA4:NM_001145263:chr10:+:126:197	chr10	+	51565233	51579136	51565233	51579136	2	51565233,51579127,	51565296,51579136,
NCOA4	NCOA4:NM_001145262:chr10:+:206:223	chr10	+	51576490	51579136	51576490	51579136	2	51576490,51579127,	51576499,51579136,
DKK1	DKK1:NM_012242:chr10:+:57:152	chr10	+	54074097	54074193	54074097	54074193	1	54074097,	54074193,
NET1	NET1:NM_001047160:chr10:+:16:45	chr10	+	5454529	5454559	5454529	5454559	1	5454529,	5454559,
NET1	NET1:NM_005863:chr10:+:88:168	chr10	+	5488601	5488682	5488601	5488682	1	5488601,	5488682,
NET1	NET1:NM_005863:chr10:+:165:197	chr10	+	5488678	5488711	5488678	5488711	1	5488678,	5488711,
FAM208B	FAM208B:NM_017782:chr10:+:38:85	chr10	+	5726838	5726886	5726838	5726886	1	5726838,	5726886,
FAM208B	FAM208B:NM_017782:chr10:+:277:372	chr10	+	5727077	5754820	5727077	5754820	2	5727077,5754785,	5727138,5754820,
FAM208B	FAM208B:NM_017782:chr10:+:413:508	chr10	+	5754860	5759696	5754860	5759696	2	5754860,5759621,	5754881,5759696,
RBM17	RBM17:NM_032905:chr10:+:181:213	chr10	+	6131129	6139016	6131129	6139016	2	6131129,6139010,	6131156,6139016,
CDK1	CDK1:NM_001170407:chr10:+:28:57	chr10	+	62538239	62538269	62538239	62538269	1	62538239,	62538269,
ARID5B	ARID5B:NM_001244638:chr10:+:93:164	chr10	+	63809062	63809134	63809062	63809134	1	63809062,	63809134,
ARID5B	ARID5B:NM_001244638:chr10:+:193:222	chr10	+	63809162	63809192	63809162	63809192	1	63809162,	63809192,
ADO	ADO:NM_032804:chr10:+:1:18	chr10	+	64564516	64564534	64564516	64564534	1	64564516,	64564534,
REEP3	REEP3:NM_001001330:chr10:+:13:180	chr10	+	65281135	65281303	65281135	65281303	1	65281135,	65281303,
SIRT1	SIRT1:NM_001142498:chr10:+:197:361	chr10	+	69645135	69651185	69645135	69651185	3	69645135,69647174,69651159,	69645157,69647291,69651185,
MYPN	MYPN:NM_001256268:chr10:+:356:1324	chr10	+	69881195	69895979	69881195	69895979	3	69881195,69895215,69895966,	69882097,69895269,69895979,
HNRNPH3	HNRNPH3:NM_012207:chr10:+:160:201	chr10	+	70091927	70091969	70091927	70091969	1	70091927,	70091969,
CCAR1	CCAR1:NM_018237:chr10:+:37:81	chr10	+	70481007	70482224	70481007	70482224	2	70481007,70482211,	70481039,70482224,
DDX21	DDX21:NM_004728:chr10:+:83:100	chr10	+	70715961	70715979	70715961	70715979	1	70715961,	70715979,
SRGN	SRGN:NM_002727:chr10:+:50:73	chr10	+	70847877	70847901	70847877	70847901	1	70847877,	70847901,
VPS26A	VPS26A:NM_001035260:chr10:+:92:100	chr10	+	70883999	70884008	70883999	70884008	1	70883999,	70884008,
EIF4EBP2	EIF4EBP2:NM_004096:chr10:+:63:137	chr10	+	72163923	72163998	72163923	72163998	1	72163923,	72163998,
SGPL1	SGPL1:NM_003901:chr10:+:85:174	chr10	+	72575788	72575878	72575788	72575878	1	72575788,	72575878,
CHST3	CHST3:NM_004273:chr10:+:268:354	chr10	+	73724387	73765515	73724387	73765515	2	73724387,73765493,	73724452,73765515,
CHST3	CHST3:NM_004273:chr10:+:365:379	chr10	+	73765525	73765540	73765525	73765540	1	73765525,	73765540,
ANAPC16	ANAPC16:NM_001242547:chr10:+:70:75	chr10	+	73975827	73983648	73975827	73983648	2	73975827,73983645,	73975830,73983648,
ANAPC16	ANAPC16:NM_001242547:chr10:+:72:80	chr10	+	73975829	73983653	73975829	73983653	2	73975829,73983645,	73975830,73983653,
ANAPC16	ANAPC16:NM_001242546:chr10:+:92:115	chr10	+	73975849	73975873	73975849	73975873	1	73975849,	73975873,
ANAPC16	ANAPC16:NM_001242546:chr10:+:122:160	chr10	+	73975879	73979833	73975879	73979833	2	73975879,73979811,	73975896,73979833,
ANAPC16	ANAPC16:NM_173473:chr10:+:138:146	chr10	+	73975895	73983653	73975895	73983653	2	73975895,73983645,	73975896,73983653,
ANAPC16	ANAPC16:NM_001242546:chr10:+:462:467	chr10	+	73980134	73983648	73980134	73983648	2	73980134,73983645,	73980137,73983648,
ANAPC16	ANAPC16:NM_001242546:chr10:+:464:472	chr10	+	73980136	73983653	73980136	73983653	2	73980136,73983645,	73980137,73983653,
DDIT4	DDIT4:NM_019058:chr10:+:24:116	chr10	+	74033700	74033793	74033700	74033793	1	74033700,	74033793,
FAM149B1	FAM149B1:NM_173348:chr10:+:37:84	chr10	+	74927913	74927961	74927913	74927961	1	74927913,	74927961,
FAM149B1	FAM149B1:NM_173348:chr10:+:62:106	chr10	+	74927938	74927983	74927938	74927983	1	74927938,	74927983,
SEC24C	SEC24C:NM_004922:chr10:+:16:147	chr10	+	75504146	75506470	75504146	75506470	2	75504146,75506387,	75504195,75506470,
SEC24C	SEC24C:NM_004922:chr10:+:169:180	chr10	+	75506579	75506591	75506579	75506591	1	75506579,	75506591,
PLAU	PLAU:NM_001145031:chr10:+:146:223	chr10	+	75671313	75671391	75671313	75671391	1	75671313,	75671391,
ADK	ADK:NM_001123:chr10:+:60:290	chr10	+	75936306	75936537	75936306	75936537	1	75936306,	75936537,
KAT6B	KAT6B:NM_001256468:chr10:+:163:420	chr10	+	76586333	76598488	76586333	76598488	2	76586333,76598440,	76586543,76598488,
KAT6B	KAT6B:NM_001256468:chr10:+:568:609	chr10	+	76602482	76602524	76602482	76602524	1	76602482,	76602524,
VDAC2	VDAC2:NM_001184783:chr10:+:245:358	chr10	+	76970544	76970658	76970544	76970658	1	76970544,	76970658,
VDAC2	VDAC2:NM_001184783:chr10:+:422:475	chr10	+	76970916	76971262	76970916	76971262	2	76970916,76971239,	76970947,76971262,
RPS24	RPS24:NM_001026:chr10:+:79:126	chr10	+	79793596	79793644	79793596	79793644	1	79793596,	79793644,
ZMIZ1	ZMIZ1:NM_020338:chr10:+:172:258	chr10	+	80828963	80878694	80828963	80878694	2	80828963,80878671,	80829027,80878694,
ZMIZ1	ZMIZ1:NM_020338:chr10:+:272:397	chr10	+	80878707	80899490	80878707	80899490	2	80878707,80899438,	80878781,80899490,
FAM190B	FAM190B:NM_018999:chr10:+:12:56	chr10	+	86088421	86088466	86088421	86088466	1	86088421,	86088466,
BMPR1A	BMPR1A:NM_004329:chr10:+:261:326	chr10	+	88516656	88598667	88516656	88598667	2	88516656,88598621,	88516676,88598667,
BMPR1A	BMPR1A:NM_004329:chr10:+:293:382	chr10	+	88598633	88598723	88598633	88598723	1	88598633,	88598723,
PTEN	PTEN:NM_000314:chr10:+:213:227	chr10	+	89623407	89623422	89623407	89623422	1	89623407,	89623422,
PTEN	PTEN:NM_000314:chr10:+:271:408	chr10	+	89623465	89623603	89623465	89623603	1	89623465,	89623603,
STAMBPL1	STAMBPL1:NM_020799:chr10:+:372:452	chr10	+	90640315	90661413	90640315	90661413	2	90640315,90661412,	90640395,90661413,
FAS	FAS:NM_000043:chr10:+:132:236	chr10	+	90750419	90750524	90750419	90750524	1	90750419,	90750524,
PCGF5	PCGF5:NM_001256549:chr10:+:179:208	chr10	+	92982447	92982477	92982447	92982477	1	92982447,	92982477,
PCGF5	PCGF5:NM_001256549:chr10:+:208:312	chr10	+	92982476	92982581	92982476	92982581	1	92982476,	92982581,
PCGF5	PCGF5:NM_001256549:chr10:+:287:337	chr10	+	92982555	92982606	92982555	92982606	1	92982555,	92982606,
TNKS2	TNKS2:NM_025235:chr10:+:151:168	chr10	+	93558301	93558319	93558301	93558319	1	93558301,	93558319,
CEP55	CEP55:NM_018131:chr10:+:57:197	chr10	+	95256445	95256586	95256445	95256586	1	95256445,	95256586,
HELLS	HELLS:NM_018063:chr10:+:56:94	chr10	+	96305629	96305668	96305629	96305668	1	96305629,	96305668,
CCNJ	CCNJ:NM_001134375:chr10:+:185:223	chr10	+	97803343	97803382	97803343	97803382	1	97803343,	97803382,
LCOR	LCOR:NM_001170765:chr10:+:43:186	chr10	+	98592059	98593209	98592059	98593209	2	98592059,98593162,	98592156,98593209,
LCOR	LCOR:NM_032440:chr10:+:87:206	chr10	+	98592798	98593209	98592798	98593209	2	98592798,98593162,	98592871,98593209,
ZDHHC16	ZDHHC16:NM_032327:chr10:+:12:80	chr10	+	99205941	99206010	99205941	99206010	1	99205941,	99206010,
ZFYVE27	ZFYVE27:NM_001002262:chr10:+:85:204	chr10	+	99496962	99497082	99496962	99497082	1	99496962,	99497082,
R3HCC1L	R3HCC1L:NM_001256619:chr10:+:153:182	chr10	+	99922654	99922684	99922654	99922684	1	99922654,	99922684,
GOT1	GOT1:NM_002079:chr10:-:125:181	chr10	-	101190348	101190405	101190348	101190405	1	101190348,	101190405,
ERLIN1	ERLIN1:NM_006459:chr10:-:206:316	chr10	-	101945417	101945528	101945417	101945528	1	101945417,	101945528,
ERLIN1	ERLIN1:NM_001100626:chr10:-:81:92	chr10	-	101945721	101945733	101945721	101945733	1	101945721,	101945733,
MRPL43	MRPL43:NM_032112:chr10:-:64:69	chr10	-	102747202	102747208	102747202	102747208	1	102747202,	102747208,
POLL	POLL:NM_001174084:chr10:-:360:374	chr10	-	103347652	103347667	103347652	103347667	1	103347652,	103347667,
LDB1	LDB1:NM_003893:chr10:-:417:467	chr10	-	103874255	103874306	103874255	103874306	1	103874255,	103874306,
LDB1	LDB1:NM_003893:chr10:-:238:459	chr10	-	103874263	103874485	103874263	103874485	1	103874263,	103874485,
NT5C2	NT5C2:NM_012229:chr10:-:105:110	chr10	-	104941045	104941051	104941045	104941051	1	104941045,	104941051,
USMG5	USMG5:NM_001206426:chr10:-:98:109	chr10	-	105152218	105156172	105152218	105156172	2	105152218,105156165,	105152223,105156172,
USMG5	USMG5:NM_032747:chr10:-:213:245	chr10	-	105154010	105154043	105154010	105154043	1	105154010,	105154043,
USMG5	USMG5:NM_032747:chr10:-:98:202	chr10	-	105154053	105156172	105154053	105156172	2	105154053,105156165,	105154151,105156172,
USMG5	USMG5:NM_001206427:chr10:-:314:340	chr10	-	105155553	105155580	105155553	105155580	1	105155553,	105155580,
USMG5	USMG5:NM_001206427:chr10:-:299:304	chr10	-	105155589	105155595	105155589	105155595	1	105155589,	105155595,
USMG5	USMG5:NM_001206427:chr10:-:105:278	chr10	-	105155615	105155789	105155615	105155789	1	105155615,	105155789,
USMG5	USMG5:NM_001206427:chr10:-:191:229	chr10	-	105155664	105155703	105155664	105155703	1	105155664,	105155703,
CALHM2	CALHM2:NM_015916:chr10:-:439:483	chr10	-	105209825	105210853	105209825	105210853	2	105209825,105210839,	105209856,105210853,
CALHM2	CALHM2:NM_015916:chr10:-:183:299	chr10	-	105210992	105211979	105210992	105211979	2	105210992,105211912,	105211042,105211979,
OBFC1	OBFC1:NM_024928:chr10:-:2:250	chr10	-	105677351	105678043	105677351	105678043	2	105677351,105677857,	105677414,105678043,
COL17A1	COL17A1:NM_000494:chr10:-:39:80	chr10	-	105845557	105845599	105845557	105845599	1	105845557,	105845599,
BBIP1	BBIP1:NM_001195304:chr10:-:132:176	chr10	-	112678947	112678992	112678947	112678992	1	112678947,	112678992,
GPAM	GPAM:NM_001244949:chr10:-:144:191	chr10	-	113941564	113942592	113941564	113942592	2	113941564,113942551,	113941571,113942592,
GPAM	GPAM:NM_001244949:chr10:-:109:147	chr10	-	113942588	113942627	113942588	113942627	1	113942588,	113942627,
ZDHHC6	ZDHHC6:NM_022494:chr10:-:318:401	chr10	-	114205216	114205300	114205216	114205300	1	114205216,	114205300,
ZDHHC6	ZDHHC6:NM_022494:chr10:-:175:288	chr10	-	114205329	114206497	114205329	114206497	2	114205329,114206462,	114205408,114206497,
ZDHHC6	ZDHHC6:NM_022494:chr10:-:110:151	chr10	-	114206520	114206562	114206520	114206562	1	114206520,	114206562,
DCLRE1A	DCLRE1A:NM_014881:chr10:-:648:692	chr10	-	115613166	115613211	115613166	115613211	1	115613166,	115613211,
DCLRE1A	DCLRE1A:NM_014881:chr10:-:463:537	chr10	-	115613321	115613396	115613321	115613396	1	115613321,	115613396,
DCLRE1A	DCLRE1A:NM_014881:chr10:-:159:323	chr10	-	115613535	115613700	115613535	115613700	1	115613535,	115613700,
C10orf118	C10orf118:NM_018017:chr10:-:518:562	chr10	-	115933801	115933846	115933801	115933846	1	115933801,	115933846,
C10orf118	C10orf118:NM_018017:chr10:-:412:537	chr10	-	115933826	115933952	115933826	115933952	1	115933826,	115933952,
ABLIM1	ABLIM1:NM_006720:chr10:-:158:265	chr10	-	116286419	116286527	116286419	116286527	1	116286419,	116286527,
ABLIM1	ABLIM1:NM_006720:chr10:-:114:119	chr10	-	116286565	116286571	116286565	116286571	1	116286565,	116286571,
ABLIM1	ABLIM1:NM_006720:chr10:-:74:112	chr10	-	116286572	116286611	116286572	116286611	1	116286572,	116286611,
USP6NL	USP6NL:NM_014688:chr10:-:113:136	chr10	-	11653542	11653566	11653542	11653566	1	11653542,	11653566,
GFRA1	GFRA1:NM_001145453:chr10:-:236:295	chr10	-	118031613	118031673	118031613	118031673	1	118031613,	118031673,
KIAA1598	KIAA1598:NM_001258298:chr10:-:498:560	chr10	-	118728218	118764590	118728218	118764590	2	118728218,118764532,	118728223,118764590,
PDZD8	PDZD8:NM_173791:chr10:-:118:144	chr10	-	119134792	119134819	119134792	119134819	1	119134792,	119134819,
RAB11FIP2	RAB11FIP2:NM_014904:chr10:-:356:364	chr10	-	119805749	119805758	119805749	119805758	1	119805749,	119805758,
RAB11FIP2	RAB11FIP2:NM_014904:chr10:-:212:325	chr10	-	119805788	119805902	119805788	119805902	1	119805788,	119805902,
RAB11FIP2	RAB11FIP2:NM_014904:chr10:-:31:294	chr10	-	119805819	119806083	119805819	119806083	1	119805819,	119806083,
FAM204A	FAM204A:NM_022063:chr10:-:29:67	chr10	-	120101429	120101810	120101429	120101810	2	120101429,120101781,	120101439,120101810,
CACUL1	CACUL1:NM_153810:chr10:-:392:397	chr10	-	120514360	120514366	120514360	120514366	1	120514360,	120514366,
UPF2	UPF2:NM_015542:chr10:-:67:105	chr10	-	12077421	12084773	12077421	12084773	2	12077421,12084753,	12077440,12084773,
TIAL1	TIAL1:NM_001033925:chr10:-:273:290	chr10	-	121356250	121356268	121356250	121356268	1	121356250,	121356268,
NUDT5	NUDT5:NM_014142:chr10:-:396:401	chr10	-	12228304	12228310	12228304	12228310	1	12228304,	12228310,
NUDT5	NUDT5:NM_014142:chr10:-:181:204	chr10	-	12237938	12237962	12237938	12237962	1	12237938,	12237962,
FAM24B	FAM24B:NM_001204364:chr10:-:114:236	chr10	-	124615222	124639043	124615222	124639043	2	124615222,124639000,	124615302,124639043,
IKZF5	IKZF5:NM_022466:chr10:-:144:248	chr10	-	124766545	124766650	124766545	124766650	1	124766545,	124766650,
IKZF5	IKZF5:NM_022466:chr10:-:9:131	chr10	-	124766662	124768302	124766662	124768302	2	124766662,124768209,	124766692,124768302,
IKZF5	IKZF5:NM_022466:chr10:-:110:127	chr10	-	124766666	124766684	124766666	124766684	1	124766666,	124766684,
CHST15	CHST15:NM_001270764:chr10:-:419:544	chr10	-	125805834	125805960	125805834	125805960	1	125805834,	125805960,
CHST15	CHST15:NM_001270764:chr10:-:271:354	chr10	-	125806024	125806108	125806024	125806108	1	125806024,	125806108,
CHST15	CHST15:NM_001270764:chr10:-:201:206	chr10	-	125806172	125806178	125806172	125806178	1	125806172,	125806178,
CHST15	CHST15:NM_001270764:chr10:-:55:66	chr10	-	125853056	125853068	125853056	125853068	1	125853056,	125853068,
FAM53B	FAM53B:NM_014661:chr10:-:186:356	chr10	-	126395448	126432744	126395448	126432744	2	126395448,126432581,	126395456,126432744,
CTBP2	CTBP2:NM_001083914:chr10:-:259:309	chr10	-	126799581	126799632	126799581	126799632	1	126799581,	126799632,
CTBP2	CTBP2:NM_001083914:chr10:-:245:262	chr10	-	126799628	126799646	126799628	126799646	1	126799628,	126799646,
CTBP2	CTBP2:NM_001329:chr10:-:191:241	chr10	-	126799636	126848912	126799636	126848912	2	126799636,126848887,	126799662,126848912,
CTBP2	CTBP2:NM_001083914:chr10:-:206:244	chr10	-	126799646	126849418	126799646	126849418	2	126799646,126849395,	126799662,126849418,
CTBP2	CTBP2:NM_001329:chr10:-:79:90	chr10	-	126849012	126849024	126849012	126849024	1	126849012,	126849024,
UROS	UROS:NM_000375:chr10:-:0:266	chr10	-	127505067	127511837	127505067	127511837	2	127505067,127511597,	127505094,127511837,
DHX32	DHX32:NM_018180:chr10:-:426:437	chr10	-	127569446	127569458	127569446	127569458	1	127569446,	127569458,
DHX32	DHX32:NM_018180:chr10:-:269:307	chr10	-	127569576	127569615	127569576	127569615	1	127569576,	127569615,
MKI67	MKI67:NM_001145966:chr10:-:12:119	chr10	-	129924006	129924456	129924006	129924456	2	129924006,129924362,	129924020,129924456,
SEPHS1	SEPHS1:NM_001195604:chr10:-:299:310	chr10	-	13387016	13387028	13387016	13387028	1	13387016,	13387028,
TUBGCP2	TUBGCP2:NM_001256617:chr10:-:348:368	chr10	-	135116449	135116470	135116449	135116470	1	135116449,	135116470,
DCLRE1C	DCLRE1C:NM_001033857:chr10:-:85:249	chr10	-	14989604	14996009	14989604	14996009	3	14989604,14991034,14995900,	14989608,14991086,14996009,
FAM188A	FAM188A:NM_024948:chr10:-:47:55	chr10	-	15902463	15902472	15902463	15902472	1	15902463,	15902472,
RSU1	RSU1:NM_012425:chr10:-:77:124	chr10	-	16859328	16859376	16859328	16859376	1	16859328,	16859376,
NSUN6	NSUN6:NM_182543:chr10:-:173:238	chr10	-	18940311	18940377	18940311	18940377	1	18940311,	18940377,
DNAJC1	DNAJC1:NM_022365:chr10:-:29:193	chr10	-	22292456	22292621	22292456	22292621	1	22292456,	22292621,
PIP4K2A	PIP4K2A:NM_005028:chr10:-:185:190	chr10	-	23003312	23003318	23003312	23003318	1	23003312,	23003318,
ARHGAP21	ARHGAP21:NM_020824:chr10:-:170:316	chr10	-	25010998	25011145	25010998	25011145	1	25010998,	25011145,
ANKRD26	ANKRD26:NM_001256053:chr10:-:4:153	chr10	-	27389273	27389423	27389273	27389423	1	27389273,	27389423,
SVIL	SVIL:NM_021738:chr10:-:47:196	chr10	-	29923704	29923854	29923704	29923854	1	29923704,	29923854,
SVIL	SVIL:NM_003174:chr10:-:194:235	chr10	-	29946911	29946953	29946911	29946953	1	29946911,	29946953,
SVIL	SVIL:NM_003174:chr10:-:63:134	chr10	-	29975496	29975568	29975496	29975568	1	29975496,	29975568,
ZNF438	ZNF438:NM_001143766:chr10:-:135:224	chr10	-	31230518	31273325	31230518	31273325	2	31230518,31273297,	31230580,31273325,
ARHGAP12	ARHGAP12:NM_001270695:chr10:-:200:205	chr10	-	32199479	32199485	32199479	32199485	1	32199479,	32199485,
KIF5B	KIF5B:NM_004521:chr10:-:266:424	chr10	-	32344946	32345105	32344946	32345105	1	32344946,	32345105,
KIF5B	KIF5B:NM_004521:chr10:-:243:269	chr10	-	32345101	32345128	32345101	32345128	1	32345101,	32345128,
KIF5B	KIF5B:NM_004521:chr10:-:102:197	chr10	-	32345173	32345269	32345173	32345269	1	32345173,	32345269,
NRP1	NRP1:NM_001024628:chr10:-:316:330	chr10	-	33623502	33623517	33623502	33623517	1	33623502,	33623517,
NRP1	NRP1:NM_001024628:chr10:-:242:307	chr10	-	33623525	33623591	33623525	33623591	1	33623525,	33623591,
PARD3	PARD3:NM_001184785:chr10:-:76:213	chr10	-	35104039	35104177	35104039	35104177	1	35104039,	35104177,
CUL2	CUL2:NM_003591:chr10:-:56:70	chr10	-	35379240	35379255	35379240	35379255	1	35379240,	35379255,
ZNF248	ZNF248:NM_001267605:chr10:-:312:395	chr10	-	38146168	38146252	38146168	38146252	1	38146168,	38146252,
KLF6	KLF6:NM_001160124:chr10:-:156:170	chr10	-	3827302	3827317	3827302	3827317	1	3827302,	3827317,
HNRNPF	HNRNPF:NM_001098204:chr10:-:275:310	chr10	-	43890078	43890114	43890078	43890114	1	43890078,	43890114,
HNRNPF	HNRNPF:NM_001098204:chr10:-:238:288	chr10	-	43890100	43891918	43890100	43891918	2	43890100,43891903,	43890136,43891918,
HNRNPF	HNRNPF:NM_001098204:chr10:-:133:171	chr10	-	43891984	43892023	43891984	43892023	1	43891984,	43892023,
MARCH8	MARCH8:NM_001002265:chr10:-:775:816	chr10	-	46028685	46028727	46028685	46028727	1	46028685,	46028727,
MARCH8	MARCH8:NM_001002265:chr10:-:575:601	chr10	-	46089752	46089779	46089752	46089779	1	46089752,	46089779,
MARCH8	MARCH8:NM_001002265:chr10:-:278:499	chr10	-	46089854	46090076	46089854	46090076	1	46089854,	46090076,
MARCH8	MARCH8:NM_001002265:chr10:-:86:136	chr10	-	46090217	46090268	46090217	46090268	1	46090217,	46090268,
ZFAND4	ZFAND4:NM_174890:chr10:-:387:671	chr10	-	46159172	46167864	46159172	46167864	2	46159172,46167697,	46159290,46167864,
ARHGAP22	ARHGAP22:NM_001256024:chr10:-:104:133	chr10	-	49813042	49813072	49813042	49813072	1	49813042,	49813072,
SGMS1	SGMS1:NM_147156:chr10:-:790:909	chr10	-	52103918	52104038	52103918	52104038	1	52103918,	52104038,
SGMS1	SGMS1:NM_147156:chr10:-:744:752	chr10	-	52104075	52104084	52104075	52104084	1	52104075,	52104084,
SGMS1	SGMS1:NM_147156:chr10:-:473:511	chr10	-	52220562	52226676	52220562	52226676	2	52220562,52226649,	52220574,52226676,
IPMK	IPMK:NM_152230:chr10:-:167:238	chr10	-	60027455	60027527	60027455	60027527	1	60027455,	60027527,
JMJD1C	JMJD1C:NM_004241:chr10:-:365:421	chr10	-	65028560	65028617	65028560	65028617	1	65028560,	65028617,
JMJD1C	JMJD1C:NM_004241:chr10:-:90:182	chr10	-	65028799	65028892	65028799	65028892	1	65028799,	65028892,
DNAJC12	DNAJC12:NM_021800:chr10:-:30:80	chr10	-	69597856	69597907	69597856	69597907	1	69597856,	69597907,
HERC4	HERC4:NM_015601:chr10:-:225:302	chr10	-	69832873	69833421	69832873	69833421	2	69832873,69833413,	69832943,69833421,
HERC4	HERC4:NM_015601:chr10:-:159:194	chr10	-	69834908	69834944	69834908	69834944	1	69834908,	69834944,
SLC25A16	SLC25A16:NM_152707:chr10:-:100:123	chr10	-	70287156	70287180	70287156	70287180	1	70287156,	70287180,
SLC25A16	SLC25A16:NM_152707:chr10:-:87:110	chr10	-	70287169	70287193	70287169	70287193	1	70287169,	70287193,
SAR1A	SAR1A:NM_001142648:chr10:-:182:190	chr10	-	71921683	71922450	71921683	71922450	2	71921683,71922445,	71921687,71922450,
SAR1A	SAR1A:NM_020150:chr10:-:94:120	chr10	-	71921683	71930191	71921683	71930191	2	71921683,71930168,	71921687,71930191,
SAR1A	SAR1A:NM_001142648:chr10:-:32:58	chr10	-	71930226	71930253	71930226	71930253	1	71930226,	71930253,
MICU1	MICU1:NM_001195518:chr10:-:123:149	chr10	-	74385799	74385826	74385799	74385826	1	74385799,	74385826,
P4HA1	P4HA1:NM_000917:chr10:-:211:216	chr10	-	74834665	74834671	74834665	74834671	1	74834665,	74834671,
ECD	ECD:NM_001135752:chr10:-:50:124	chr10	-	74927728	74927803	74927728	74927803	1	74927728,	74927803,
MRPS16	MRPS16:NM_016065:chr10:-:100:156	chr10	-	75012294	75012351	75012294	75012351	1	75012294,	75012351,
PPP3CB	PPP3CB:NM_001142353:chr10:-:40:75	chr10	-	75255706	75255742	75255706	75255742	1	75255706,	75255742,
NDST2	NDST2:NM_003635:chr10:-:250:363	chr10	-	75570655	75571339	75570655	75571339	2	75570655,75571231,	75570661,75571339,
AP3M1	AP3M1:NM_207012:chr10:-:339:431	chr10	-	75898571	75898664	75898571	75898664	1	75898571,	75898664,
AP3M1	AP3M1:NM_207012:chr10:-:297:317	chr10	-	75898685	75910529	75898685	75910529	2	75898685,75910512,	75898689,75910529,
KCNMA1	KCNMA1:NM_001014797:chr10:-:94:174	chr10	-	79397402	79397483	79397402	79397483	1	79397402,	79397483,
WAPAL	WAPAL:NM_015045:chr10:-:54:191	chr10	-	88281349	88281487	88281349	88281487	1	88281349,	88281487,
WAPAL	WAPAL:NM_015045:chr10:-:43:87	chr10	-	88281453	88281498	88281453	88281498	1	88281453,	88281498,
ATAD1	ATAD1:NM_032810:chr10:-:21:56	chr10	-	89577860	89577896	89577860	89577896	1	89577860,	89577896,
LIPA	LIPA:NM_001127605:chr10:-:123:170	chr10	-	91011489	91011537	91011489	91011537	1	91011489,	91011537,
NOC3L	NOC3L:NM_022451:chr10:-:11:85	chr10	-	96122597	96122672	96122597	96122672	1	96122597,	96122672,
LARP4B	LARP4B:NM_015155:chr10:-:170:274	chr10	-	977370	977475	977370	977475	1	977370,	977475,
LARP4B	LARP4B:NM_015155:chr10:-:15:59	chr10	-	977585	977630	977585	977630	1	977585,	977630,
TM9SF3	TM9SF3:NM_020123:chr10:-:122:187	chr10	-	98346621	98346687	98346621	98346687	1	98346621,	98346687,
MORN4	MORN4:NM_178832:chr10:-:103:261	chr10	-	99379419	99393241	99379419	99393241	2	99379419,99393103,	99379440,99393241,
AVPI1	AVPI1:NM_021732:chr10:-:488:493	chr10	-	99439671	99446527	99439671	99446527	2	99439671,99446522,	99439672,99446527,
AVPI1	AVPI1:NM_021732:chr10:-:398:445	chr10	-	99446569	99446617	99446569	99446617	1	99446569,	99446617,
AVPI1	AVPI1:NM_021732:chr10:-:300:311	chr10	-	99446703	99446715	99446703	99446715	1	99446703,	99446715,
AVPI1	AVPI1:NM_021732:chr10:-:176:241	chr10	-	99446773	99446839	99446773	99446839	1	99446773,	99446839,
AVPI1	AVPI1:NM_021732:chr10:-:85:150	chr10	-	99446864	99446930	99446864	99446930	1	99446864,	99446930,
BIRC3	BIRC3:NM_001165:chr11:+:96:152	chr11	+	102188276	102192598	102188276	102192598	2	102188276,102192567,	102188302,102192598,
BIRC3	BIRC3:NM_001165:chr11:+:194:205	chr11	+	102192639	102192651	102192639	102192651	1	102192639,	102192651,
BIRC3	BIRC3:NM_001165:chr11:+:297:311	chr11	+	102192742	102192757	102192742	102192757	1	102192742,	102192757,
BIRC3	BIRC3:NM_001165:chr11:+:314:376	chr11	+	102192759	102192822	102192759	102192822	1	102192759,	102192822,
BIRC3	BIRC3:NM_001165:chr11:+:486:560	chr11	+	102192931	102193006	102192931	102193006	1	102192931,	102193006,
BIRC3	BIRC3:NM_001165:chr11:+:641:730	chr11	+	102193086	102193176	102193086	102193176	1	102193086,	102193176,
BIRC2	BIRC2:NM_001256163:chr11:+:229:357	chr11	+	102218333	102218462	102218333	102218462	1	102218333,	102218462,
BIRC2	BIRC2:NM_001166:chr11:+:257:289	chr11	+	102219390	102219423	102219390	102219423	1	102219390,	102219423,
BIRC2	BIRC2:NM_001166:chr11:+:494:514	chr11	+	102219627	102219648	102219627	102219648	1	102219627,	102219648,
BIRC2	BIRC2:NM_001166:chr11:+:529:552	chr11	+	102219662	102219686	102219662	102219686	1	102219662,	102219686,
BIRC2	BIRC2:NM_001166:chr11:+:553:633	chr11	+	102219686	102219767	102219686	102219767	1	102219686,	102219767,
BIRC2	BIRC2:NM_001166:chr11:+:669:707	chr11	+	102219802	102219841	102219802	102219841	1	102219802,	102219841,
BIRC2	BIRC2:NM_001166:chr11:+:856:891	chr11	+	102219989	102220025	102219989	102220025	1	102219989,	102220025,
BIRC2	BIRC2:NM_001166:chr11:+:901:963	chr11	+	102220034	102220097	102220034	102220097	1	102220034,	102220097,
AMPD3	AMPD3:NM_001172431:chr11:+:200:472	chr11	+	10483066	10503661	10483066	10503661	2	10483066,10503609,	10483287,10503661,
CUL5	CUL5:NM_003478:chr11:+:359:466	chr11	+	107879766	107879874	107879766	107879874	1	107879766,	107879874,
CUL5	CUL5:NM_003478:chr11:+:469:474	chr11	+	107879876	107879882	107879876	107879882	1	107879876,	107879882,
ATM	ATM:NM_000051:chr11:+:140:355	chr11	+	108093698	108098322	108093698	108098322	2	108093698,108098321,	108093913,108098322,
ATM	ATM:NM_000051:chr11:+:361:381	chr11	+	108098327	108098348	108098327	108098348	1	108098327,	108098348,
DIXDC1	DIXDC1:NM_033425:chr11:+:9:92	chr11	+	111848041	111848125	111848041	111848125	1	111848041,	111848125,
C11orf57	C11orf57:NM_001082970:chr11:+:117:209	chr11	+	111945084	111945177	111945084	111945177	1	111945084,	111945177,
C11orf57	C11orf57:NM_001082970:chr11:+:618:677	chr11	+	111945585	111946295	111945585	111946295	2	111945585,111946290,	111945640,111946295,
ZBTB16	ZBTB16:NM_006006:chr11:+:23:73	chr11	+	113930453	113930504	113930453	113930504	1	113930453,	113930504,
NNMT	NNMT:NM_006169:chr11:+:27:59	chr11	+	114166561	114166594	114166561	114166594	1	114166561,	114166594,
NNMT	NNMT:NM_006169:chr11:+:67:390	chr11	+	114166601	114166925	114166601	114166925	1	114166601,	114166925,
NNMT	NNMT:NM_006169:chr11:+:628:651	chr11	+	114167162	114167186	114167162	114167186	1	114167162,	114167186,
NNMT	NNMT:NM_006169:chr11:+:670:744	chr11	+	114167204	114167279	114167204	114167279	1	114167204,	114167279,
NNMT	NNMT:NM_006169:chr11:+:723:737	chr11	+	114167257	114167272	114167257	114167272	1	114167257,	114167272,
PAFAH1B2	PAFAH1B2:NM_001184746:chr11:+:135:140	chr11	+	117023156	117023162	117023156	117023162	1	117023156,	117023162,
TAGLN	TAGLN:NM_001001522:chr11:+:168:332	chr11	+	117070207	117070372	117070207	117070372	1	117070207,	117070372,
CEP164	CEP164:NM_014956:chr11:+:84:116	chr11	+	117206354	117206387	117206354	117206387	1	117206354,	117206387,
UBE4A	UBE4A:NM_001204077:chr11:+:113:133	chr11	+	118235773	118235794	118235773	118235794	1	118235773,	118235794,
ATP5L	ATP5L:NM_006476:chr11:+:19:102	chr11	+	118272122	118272206	118272122	118272206	1	118272122,	118272206,
USP47	USP47:NM_017944:chr11:+:670:696	chr11	+	11863639	11863666	11863639	11863666	1	11863639,	11863666,
TRAPPC4	TRAPPC4:NM_016146:chr11:+:86:229	chr11	+	118889326	118889470	118889326	118889470	1	118889326,	118889470,
RNF26	RNF26:NM_032015:chr11:+:34:78	chr11	+	119205243	119205288	119205243	119205288	1	119205243,	119205288,
RNF26	RNF26:NM_032015:chr11:+:75:125	chr11	+	119205284	119205335	119205284	119205335	1	119205284,	119205335,
RNF26	RNF26:NM_032015:chr11:+:367:534	chr11	+	119205576	119205744	119205576	119205744	1	119205576,	119205744,
ARHGEF12	ARHGEF12:NM_001198665:chr11:+:197:307	chr11	+	120207814	120207925	120207814	120207925	1	120207814,	120207925,
ARHGEF12	ARHGEF12:NM_001198665:chr11:+:205:216	chr11	+	120207822	120207834	120207822	120207834	1	120207822,	120207834,
MICAL2	MICAL2:NM_014632:chr11:+:140:199	chr11	+	12159940	12160000	12159940	12160000	1	12159940,	12160000,
UBASH3B	UBASH3B:NM_032873:chr11:+:33:134	chr11	+	122526430	122526532	122526430	122526532	1	122526430,	122526532,
UBASH3B	UBASH3B:NM_032873:chr11:+:342:356	chr11	+	122526739	122526754	122526739	122526754	1	122526739,	122526754,
TBRG1	TBRG1:NM_032811:chr11:+:86:145	chr11	+	124492827	124492887	124492827	124492887	1	124492827,	124492887,
EI24	EI24:NM_001007277:chr11:+:69:137	chr11	+	125439366	125439435	125439366	125439435	1	125439366,	125439435,
EI24	EI24:NM_001007277:chr11:+:168:182	chr11	+	125439465	125442364	125439465	125442364	2	125439465,125442353,	125439469,125442364,
EI24	EI24:NM_001007277:chr11:+:179:223	chr11	+	125442360	125442405	125442360	125442405	1	125442360,	125442405,
STT3A	STT3A:NM_152713:chr11:+:32:61	chr11	+	125462770	125462800	125462770	125462800	1	125462770,	125462800,
HYLS1	HYLS1:NM_001134793:chr11:+:650:754	chr11	+	125757604	125761366	125757604	125761366	2	125757604,125761317,	125757660,125761366,
HYLS1	HYLS1:NM_145014:chr11:+:417:452	chr11	+	125761330	125761366	125761330	125761366	1	125761330,	125761366,
TIRAP	TIRAP:NM_001039661:chr11:+:103:243	chr11	+	126159595	126160380	126159595	126160380	2	126159595,126160356,	126159712,126160380,
TIRAP	TIRAP:NM_001039661:chr11:+:186:230	chr11	+	126159678	126160367	126159678	126160367	2	126159678,126160356,	126159712,126160367,
ST3GAL4	ST3GAL4:NM_006278:chr11:+:285:395	chr11	+	126226073	126226184	126226073	126226184	1	126226073,	126226184,
ST3GAL4	ST3GAL4:NM_001254757:chr11:+:217:252	chr11	+	126276009	126276045	126276009	126276045	1	126276009,	126276045,
TEAD1	TEAD1:NM_021961:chr11:+:190:198	chr11	+	12696158	12696167	12696158	12696167	1	12696158,	12696167,
FLI1	FLI1:NM_001167681:chr11:+:302:433	chr11	+	128564112	128628028	128564112	128628028	3	128564112,128618131,128628009,	128564171,128618185,128628028,
FLI1	FLI1:NM_001271010:chr11:+:343:591	chr11	+	128564153	128634564	128564153	128634564	3	128564153,128628009,128634545,	128564171,128628221,128634564,
APLP2	APLP2:NM_001142276:chr11:+:75:140	chr11	+	129939790	129939856	129939790	129939856	1	129939790,	129939856,
APLP2	APLP2:NM_001142276:chr11:+:115:120	chr11	+	129939830	129939836	129939830	129939836	1	129939830,	129939836,
ST14	ST14:NM_021978:chr11:+:133:168	chr11	+	130029814	130029850	130029814	130029850	1	130029814,	130029850,
ARNTL	ARNTL:NM_001030272:chr11:+:62:244	chr11	+	13299386	13371517	13299386	13371517	3	13299386,13331533,13371491,	13299470,13331606,13371517,
ARNTL	ARNTL:NM_001178:chr11:+:62:319	chr11	+	13299386	13371537	13299386	13371537	4	13299386,13331533,13347959,13371491,	13299470,13331606,13348014,13371537,
ARNTL	ARNTL:NM_001178:chr11:+:195:233	chr11	+	13331582	13347974	13331582	13347974	2	13331582,13347959,	13331606,13347974,
ARNTL	ARNTL:NM_001030272:chr11:+:195:236	chr11	+	13331582	13371509	13331582	13371509	2	13331582,13371491,	13331606,13371509,
ARNTL	ARNTL:NM_001178:chr11:+:271:291	chr11	+	13348011	13371509	13348011	13371509	2	13348011,13371491,	13348014,13371509,
ARNTL	ARNTL:NM_001030273:chr11:+:353:544	chr11	+	13375855	13376824	13375855	13376824	2	13375855,13376772,	13375995,13376824,
C11orf58	C11orf58:NM_014267:chr11:+:104:109	chr11	+	16760251	16760257	16760251	16760257	1	16760251,	16760257,
NUCB2	NUCB2:NM_005013:chr11:+:159:212	chr11	+	17304404	17304458	17304404	17304458	1	17304404,	17304458,
SAA1	SAA1:NM_000331:chr11:+:55:153	chr11	+	18287862	18287961	18287862	18287961	1	18287862,	18287961,
SAA1	SAA1:NM_001178006:chr11:+:41:67	chr11	+	18287934	18287961	18287934	18287961	1	18287934,	18287961,
GTF2H1	GTF2H1:NM_001142307:chr11:+:125:400	chr11	+	18343940	18344216	18343940	18344216	1	18343940,	18344216,
NAV2	NAV2:NM_001111019:chr11:+:247:252	chr11	+	20044642	20044648	20044642	20044648	1	20044642,	20044648,
HTATIP2	HTATIP2:NM_001098522:chr11:+:9:59	chr11	+	20385411	20385462	20385411	20385462	1	20385411,	20385462,
ARL14EP	ARL14EP:NM_152316:chr11:+:113:121	chr11	+	30352444	30352453	30352444	30352453	1	30352444,	30352453,
DNAJC24	DNAJC24:NM_181706:chr11:+:71:76	chr11	+	31391447	31391453	31391447	31391453	1	31391447,	31391453,
PRRG4	PRRG4:NM_024081:chr11:+:221:247	chr11	+	32851701	32852062	32851701	32852062	2	32851701,32852053,	32851719,32852062,
QSER1	QSER1:NM_001076786:chr11:+:97:231	chr11	+	32948710	32949537	32948710	32949537	2	32948710,32949507,	32948815,32949537,
TCP11L1	TCP11L1:NM_018393:chr11:+:171:383	chr11	+	33061133	33065303	33061133	33065303	2	33061133,33065295,	33061338,33065303,
HIPK3	HIPK3:NM_001048200:chr11:+:12:167	chr11	+	33279179	33279335	33279179	33279335	1	33279179,	33279335,
HIPK3	HIPK3:NM_001048200:chr11:+:113:139	chr11	+	33279280	33279307	33279280	33279307	1	33279280,	33279307,
FJX1	FJX1:NM_014344:chr11:+:329:415	chr11	+	35640063	35640150	35640063	35640150	1	35640063,	35640150,
C11orf74	C11orf74:NM_138787:chr11:+:21:32	chr11	+	36616113	36616125	36616113	36616125	1	36616113,	36616125,
STIM1	STIM1:NM_003156:chr11:+:409:552	chr11	+	3877341	3877485	3877341	3877485	1	3877341,	3877485,
HSD17B12	HSD17B12:NM_016142:chr11:+:177:215	chr11	+	43702319	43702358	43702319	43702358	1	43702319,	43702358,
ALKBH3	ALKBH3:NM_139178:chr11:+:378:386	chr11	+	43904137	43904146	43904137	43904146	1	43904137,	43904146,
EXT2	EXT2:NM_001178083:chr11:+:108:257	chr11	+	44117206	44117356	44117206	44117356	1	44117206,	44117356,
EXT2	EXT2:NM_001178083:chr11:+:254:265	chr11	+	44117352	44117364	44117352	44117364	1	44117352,	44117364,
TSPAN18	TSPAN18:NM_130783:chr11:+:17:136	chr11	+	44785992	44881928	44785992	44881928	2	44785992,44881878,	44786062,44881928,
PTDSS2	PTDSS2:NM_030783:chr11:+:2:121	chr11	+	450281	450401	450281	450401	1	450281,	450401,
SLC35C1	SLC35C1:NM_018389:chr11:+:272:514	chr11	+	45826912	45827155	45826912	45827155	1	45826912,	45827155,
SLC35C1	SLC35C1:NM_018389:chr11:+:319:402	chr11	+	45826959	45827043	45826959	45827043	1	45826959,	45827043,
SLC35C1	SLC35C1:NM_018389:chr11:+:518:568	chr11	+	45827158	45827209	45827158	45827209	1	45827158,	45827209,
SLC35C1	SLC35C1:NM_018389:chr11:+:565:645	chr11	+	45827205	45827286	45827205	45827286	1	45827205,	45827286,
CREB3L1	CREB3L1:NM_052854:chr11:+:141:191	chr11	+	46299368	46299419	46299368	46299419	1	46299368,	46299419,
CREB3L1	CREB3L1:NM_052854:chr11:+:387:395	chr11	+	46299614	46299623	46299614	46299623	1	46299614,	46299623,
DGKZ	DGKZ:NM_001199266:chr11:+:153:188	chr11	+	46369108	46369144	46369108	46369144	1	46369108,	46369144,
ATG13	ATG13:NM_001142673:chr11:+:149:184	chr11	+	46638974	46639010	46638974	46639010	1	46638974,	46639010,
ATG13	ATG13:NM_001142673:chr11:+:313:360	chr11	+	46639138	46639186	46639138	46639186	1	46639138,	46639186,
ATG13	ATG13:NM_001142673:chr11:+:575:658	chr11	+	46639400	46651638	46639400	46651638	2	46639400,46651594,	46639440,46651638,
ATG13	ATG13:NM_001205122:chr11:+:575:649	chr11	+	46639400	46666923	46639400	46666923	2	46639400,46666888,	46639440,46666923,
C11orf49	C11orf49:NM_001003676:chr11:+:76:87	chr11	+	46958326	46958338	46958326	46958338	1	46958326,	46958338,
DDB2	DDB2:NM_000107:chr11:+:150:164	chr11	+	47236642	47236657	47236642	47236657	1	47236642,	47236657,
MADD	MADD:NM_001135943:chr11:+:101:181	chr11	+	47291771	47295432	47291771	47295432	2	47291771,47295377,	47291797,47295432,
TRIM22	TRIM22:NM_001199573:chr11:+:262:330	chr11	+	5711078	5717414	5711078	5717414	2	5711078,5717396,	5711129,5717414,
ZDHHC5	ZDHHC5:NM_015457:chr11:+:11:199	chr11	+	57435484	57439506	57435484	57439506	2	57435484,57439492,	57435659,57439506,
ZDHHC5	ZDHHC5:NM_015457:chr11:+:205:246	chr11	+	57439511	57439553	57439511	57439553	1	57439511,	57439553,
ZDHHC5	ZDHHC5:NM_015457:chr11:+:253:306	chr11	+	57439559	57439613	57439559	57439613	1	57439559,	57439613,
ZDHHC5	ZDHHC5:NM_015457:chr11:+:369:434	chr11	+	57439675	57439741	57439675	57439741	1	57439675,	57439741,
ZDHHC5	ZDHHC5:NM_015457:chr11:+:883:996	chr11	+	57440189	57440303	57440189	57440303	1	57440189,	57440303,
ZDHHC5	ZDHHC5:NM_015457:chr11:+:939:1091	chr11	+	57440245	57440398	57440245	57440398	1	57440245,	57440398,
CTNND1	CTNND1:NM_001085458:chr11:+:100:411	chr11	+	57529333	57556562	57529333	57556562	2	57529333,57556508,	57529591,57556562,
CTNND1	CTNND1:NM_001085460:chr11:+:100:408	chr11	+	57529333	57558861	57529333	57558861	3	57529333,57556508,57558856,	57529518,57556627,57558861,
CTNND1	CTNND1:NM_001085462:chr11:+:100:294	chr11	+	57529333	57558866	57529333	57558866	2	57529333,57558856,	57529518,57558866,
CTNND1	CTNND1:NM_001206883:chr11:+:100:318	chr11	+	57529333	57558999	57529333	57558999	2	57529333,57558965,	57529518,57558999,
CTNND1	CTNND1:NM_001206889:chr11:+:100:459	chr11	+	57529333	57559021	57529333	57559021	3	57529333,57556508,57558965,	57529518,57556627,57559021,
CTNND1	CTNND1:NM_001085458:chr11:+:305:334	chr11	+	57529538	57529568	57529538	57529568	1	57529538,	57529568,
CTNND1	CTNND1:NM_001085458:chr11:+:408:419	chr11	+	57556558	57556570	57556558	57556570	1	57556558,	57556570,
CTNND1	CTNND1:NM_001085463:chr11:+:304:339	chr11	+	57561500	57561536	57561500	57561536	1	57561500,	57561536,
FAM111A	FAM111A:NM_001142520:chr11:+:37:159	chr11	+	58910354	58910590	58910354	58910590	2	58910354,58910555,	58910442,58910590,
FAM111A	FAM111A:NM_001142519:chr11:+:37:294	chr11	+	58910354	58910748	58910354	58910748	2	58910354,58910555,	58910419,58910748,
FAM111A	FAM111A:NM_001142520:chr11:+:114:317	chr11	+	58910431	58910748	58910431	58910748	2	58910431,58910555,	58910442,58910748,
TMEM109	TMEM109:NM_024092:chr11:+:159:233	chr11	+	60681529	60681604	60681529	60681604	1	60681529,	60681604,
TMEM109	TMEM109:NM_024092:chr11:+:273:287	chr11	+	60681643	60681658	60681643	60681658	1	60681643,	60681658,
TMEM109	TMEM109:NM_024092:chr11:+:356:364	chr11	+	60681726	60681735	60681726	60681735	1	60681726,	60681735,
TMEM132A	TMEM132A:NM_017870:chr11:+:132:158	chr11	+	60692044	60692071	60692044	60692071	1	60692044,	60692071,
TMEM138	TMEM138:NM_016464:chr11:+:386:397	chr11	+	61129858	61129870	61129858	61129870	1	61129858,	61129870,
TMEM138	TMEM138:NM_016464:chr11:+:394:432	chr11	+	61129866	61131736	61129866	61131736	2	61129866,61131723,	61129892,61131736,
METTL12	METTL12:NM_001043229:chr11:+:95:208	chr11	+	62433187	62433301	62433187	62433301	1	62433187,	62433301,
TTC9C	TTC9C:NM_173810:chr11:+:113:169	chr11	+	62496064	62496121	62496064	62496121	1	62496064,	62496121,
TTC9C	TTC9C:NM_173810:chr11:+:157:276	chr11	+	62496108	62496228	62496108	62496228	1	62496108,	62496228,
SLC3A2	SLC3A2:NM_001012662:chr11:+:127:144	chr11	+	62623610	62623628	62623610	62623628	1	62623610,	62623628,
SLC3A2	SLC3A2:NM_001012662:chr11:+:166:174	chr11	+	62623649	62623658	62623649	62623658	1	62623649,	62623658,
SLC3A2	SLC3A2:NM_001012662:chr11:+:171:209	chr11	+	62623654	62623693	62623654	62623693	1	62623654,	62623693,
SLC3A2	SLC3A2:NM_001013251:chr11:+:26:34	chr11	+	62648369	62648378	62648369	62648378	1	62648369,	62648378,
MARK2	MARK2:NM_001039469:chr11:+:144:260	chr11	+	63606543	63606660	63606543	63606660	1	63606543,	63606660,
MARK2	MARK2:NM_017490:chr11:+:52:255	chr11	+	63656038	63656242	63656038	63656242	1	63656038,	63656242,
MARK2	MARK2:NM_017490:chr11:+:410:469	chr11	+	63656396	63662650	63656396	63662650	2	63656396,63662630,	63656436,63662650,
NAA40	NAA40:NM_024771:chr11:+:92:97	chr11	+	63706533	63706539	63706533	63706539	1	63706533,	63706539,
NUDT22	NUDT22:NM_001128613:chr11:+:123:143	chr11	+	63993860	63993881	63993860	63993881	1	63993860,	63993881,
DNAJC4	DNAJC4:NM_005528:chr11:+:255:395	chr11	+	63998119	63998260	63998119	63998260	1	63998119,	63998260,
FKBP2	FKBP2:NM_004470:chr11:+:66:170	chr11	+	64008478	64008583	64008478	64008583	1	64008478,	64008583,
GPR137	GPR137:NM_001170881:chr11:+:298:303	chr11	+	64052582	64052588	64052582	64052588	1	64052582,	64052588,
GPR137	GPR137:NM_001170881:chr11:+:475:528	chr11	+	64052759	64052813	64052759	64052813	1	64052759,	64052813,
GPR137	GPR137:NM_001170880:chr11:+:13:63	chr11	+	64053594	64053645	64053594	64053645	1	64053594,	64053645,
ESRRA	ESRRA:NM_004451:chr11:+:133:168	chr11	+	64073176	64074643	64073176	64074643	2	64073176,64074639,	64073208,64074643,
SMPD1	SMPD1:NM_000543:chr11:+:168:173	chr11	+	6411811	6411817	6411811	6411817	1	6411811,	6411817,
SAC3D1	SAC3D1:NM_013299:chr11:+:40:66	chr11	+	64808415	64808442	64808415	64808442	1	64808415,	64808442,
SAC3D1	SAC3D1:NM_013299:chr11:+:199:360	chr11	+	64808574	64808736	64808574	64808736	1	64808574,	64808736,
POLA2	POLA2:NM_002689:chr11:+:5:151	chr11	+	65029436	65029583	65029436	65029583	1	65029436,	65029583,
CDC42EP2	CDC42EP2:NM_006779:chr11:+:172:288	chr11	+	65088049	65088166	65088049	65088166	1	65088049,	65088166,
CDC42EP2	CDC42EP2:NM_006779:chr11:+:347:352	chr11	+	65088224	65088230	65088224	65088230	1	65088224,	65088230,
CDC42EP2	CDC42EP2:NM_006779:chr11:+:374:460	chr11	+	65088251	65088338	65088251	65088338	1	65088251,	65088338,
EHBP1L1	EHBP1L1:NM_001099409:chr11:+:184:237	chr11	+	65343692	65343746	65343692	65343746	1	65343692,	65343746,
DRAP1	DRAP1:NM_006442:chr11:+:21:104	chr11	+	65686748	65686832	65686748	65686832	1	65686748,	65686832,
BANF1	BANF1:NM_001143985:chr11:+:363:377	chr11	+	65769912	65769927	65769912	65769927	1	65769912,	65769927,
BANF1	BANF1:NM_001143985:chr11:+:425:433	chr11	+	65769974	65769983	65769974	65769983	1	65769974,	65769983,
BANF1	BANF1:NM_003860:chr11:+:455:496	chr11	+	65770004	65770710	65770004	65770710	2	65770004,65770705,	65770041,65770710,
RCE1	RCE1:NM_001032279:chr11:+:44:352	chr11	+	66610926	66611451	66610926	66611451	3	66610926,66611229,66611430,	66611111,66611332,66611451,
KDM2A	KDM2A:NM_012308:chr11:+:18:53	chr11	+	66886757	66886793	66886757	66886793	1	66886757,	66886793,
KDM2A	KDM2A:NM_012308:chr11:+:663:800	chr11	+	66887402	66888724	66887402	66888724	2	66887402,66888704,	66887520,66888724,
KDM2A	KDM2A:NM_012308:chr11:+:730:843	chr11	+	66887469	66888767	66887469	66888767	2	66887469,66888704,	66887520,66888767,
KDM2A	KDM2A:NM_001256405:chr11:+:33:86	chr11	+	67007538	67007592	67007538	67007592	1	67007538,	67007592,
AIP	AIP:NM_003977:chr11:+:19:51	chr11	+	67250523	67250556	67250523	67250556	1	67250523,	67250556,
NDUFV1	NDUFV1:NM_001166102:chr11:+:112:129	chr11	+	67374434	67374452	67374434	67374452	1	67374434,	67374452,
TCIRG1	TCIRG1:NM_006053:chr11:+:8:55	chr11	+	67810454	67810502	67810454	67810502	1	67810454,	67810502,
LRP5	LRP5:NM_002335:chr11:+:27:41	chr11	+	68080134	68080149	68080134	68080149	1	68080134,	68080149,
PPP6R3	PPP6R3:NM_001164160:chr11:+:47:76	chr11	+	68228232	68228262	68228232	68228262	1	68228232,	68228262,
PPP6R3	PPP6R3:NM_001164164:chr11:+:132:140	chr11	+	68272634	68272643	68272634	68272643	1	68272634,	68272643,
PPP6R3	PPP6R3:NM_001164164:chr11:+:175:213	chr11	+	68272677	68272716	68272677	68272716	1	68272677,	68272716,
PPP6R3	PPP6R3:NM_001164160:chr11:+:159:167	chr11	+	68287017	68287026	68287017	68287026	1	68287017,	68287026,
PPP6R3	PPP6R3:NM_001164160:chr11:+:201:239	chr11	+	68287059	68287098	68287059	68287098	1	68287059,	68287098,
CTTN	CTTN:NM_001184740:chr11:+:125:175	chr11	+	70251386	70251437	70251386	70251437	1	70251386,	70251437,
P2RY2	P2RY2:NM_002564:chr11:+:171:272	chr11	+	72939062	72939164	72939062	72939164	1	72939062,	72939164,
MRPL48	MRPL48:NM_016055:chr11:+:20:79	chr11	+	73498936	73498996	73498936	73498996	1	73498936,	73498996,
PAAF1	PAAF1:NM_001267805:chr11:+:53:121	chr11	+	73588066	73589849	73588066	73589849	2	73588066,73589827,	73588113,73589849,
PAAF1	PAAF1:NM_001267803:chr11:+:53:154	chr11	+	73588066	73598089	73588066	73598089	3	73588066,73589823,73598075,	73588113,73589864,73598089,
PAAF1	PAAF1:NM_001267804:chr11:+:53:145	chr11	+	73588066	73598089	73588066	73598089	3	73588066,73589823,73598084,	73588113,73589864,73598089,
PAAF1	PAAF1:NM_001267805:chr11:+:82:141	chr11	+	73588095	73598089	73588095	73598089	3	73588095,73589827,73598084,	73588113,73589864,73598089,
RPS3	RPS3:NM_001260507:chr11:+:57:107	chr11	+	75110591	75112704	75110591	75112704	2	75110591,75112683,	75110621,75112704,
SERPINH1	SERPINH1:NM_001207014:chr11:+:209:268	chr11	+	75273309	75274776	75273309	75274776	2	75273309,75274771,	75273364,75274776,
UVRAG	UVRAG:NM_003369:chr11:+:49:63	chr11	+	75526260	75526275	75526260	75526275	1	75526260,	75526275,
C11orf30	C11orf30:NM_020193:chr11:+:9:80	chr11	+	76156077	76156149	76156077	76156149	1	76156077,	76156149,
AAMDC	AAMDC:NM_024684:chr11:+:11:22	chr11	+	77532218	77532230	77532218	77532230	1	77532218,	77532230,
AAMDC	AAMDC:NM_024684:chr11:+:60:89	chr11	+	77532267	77553534	77532267	77553534	2	77532267,77553524,	77532287,77553534,
C11orf82	C11orf82:NM_145018:chr11:+:159:173	chr11	+	82624359	82624374	82624359	82624374	1	82624359,	82624374,
PCF11	PCF11:NM_015885:chr11:+:224:232	chr11	+	82868360	82868369	82868360	82868369	1	82868360,	82868369,
ANKRD42	ANKRD42:NM_182603:chr11:+:192:350	chr11	+	82905482	82905641	82905482	82905641	1	82905482,	82905641,
CD151	CD151:NM_139029:chr11:+:10:75	chr11	+	832961	834534	832961	834534	2	832961,834529,	833022,834534,
CD151	CD151:NM_004357:chr11:+:68:79	chr11	+	833019	834534	833019	834534	2	833019,834529,	833026,834534,
TMEM126B	TMEM126B:NM_001193537:chr11:+:35:166	chr11	+	85339651	85340226	85339651	85340226	2	85339651,85340175,	85339732,85340226,
TMEM126B	TMEM126B:NM_001193538:chr11:+:35:157	chr11	+	85339651	85342230	85339651	85342230	2	85339651,85342188,	85339732,85342230,
TMEM126B	TMEM126B:NM_001193538:chr11:+:138:212	chr11	+	85342210	85342285	85342210	85342285	1	85342210,	85342285,
TMEM126A	TMEM126A:NM_001244735:chr11:+:73:90	chr11	+	85359035	85359053	85359035	85359053	1	85359035,	85359053,
EED	EED:NM_003797:chr11:+:119:157	chr11	+	85955924	85955963	85955924	85955963	1	85955924,	85955963,
EED	EED:NM_003797:chr11:+:176:181	chr11	+	85955981	85955987	85955981	85955987	1	85955981,	85955987,
C11orf73	C11orf73:NM_016401:chr11:+:145:159	chr11	+	86013397	86013412	86013397	86013412	1	86013397,	86013412,
AKIP1	AKIP1:NM_001206646:chr11:+:47:64	chr11	+	8932747	8932765	8932747	8932765	1	8932747,	8932765,
PANX1	PANX1:NM_015368:chr11:+:259:315	chr11	+	93862352	93862409	93862352	93862409	1	93862352,	93862409,
IPO7	IPO7:NM_006391:chr11:+:69:125	chr11	+	9406237	9406294	9406237	9406294	1	9406237,	9406294,
ANKRD49	ANKRD49:NM_017704:chr11:+:19:84	chr11	+	94227171	94229805	94227171	94229805	2	94227171,94229769,	94227201,94229805,
AMOTL1	AMOTL1:NM_130847:chr11:+:83:151	chr11	+	94501590	94501659	94501590	94501659	1	94501590,	94501659,
SRSF8	SRSF8:NM_032102:chr11:+:55:156	chr11	+	94800110	94800212	94800110	94800212	1	94800110,	94800212,
CEP57	CEP57:NM_001243776:chr11:+:68:196	chr11	+	95523692	95523821	95523692	95523821	1	95523692,	95523821,
CEP57	CEP57:NM_001243776:chr11:+:238:294	chr11	+	95523862	95528691	95523862	95528691	2	95523862,95528679,	95523907,95528691,
DCUN1D5	DCUN1D5:NM_032299:chr11:-:66:275	chr11	-	102962668	102962878	102962668	102962878	1	102962668,	102962878,
SBF2	SBF2:NM_030962:chr11:-:11:61	chr11	-	10315692	10315743	10315692	10315743	1	10315692,	10315743,
CASP4	CASP4:NM_001225:chr11:-:170:178	chr11	-	104825629	104825638	104825629	104825638	1	104825629,	104825638,
CASP4	CASP4:NM_001225:chr11:-:45:50	chr11	-	104839274	104839280	104839274	104839280	1	104839274,	104839280,
RNF141	RNF141:NM_016422:chr11:-:90:98	chr11	-	10562675	10562684	10562675	10562684	1	10562675,	10562684,
MSANTD4	MSANTD4:NM_032424:chr11:-:1307:1315	chr11	-	105881744	105881753	105881744	105881753	1	105881744,	105881753,
SLC35F2	SLC35F2:NM_017515:chr11:-:62:100	chr11	-	107729813	107729852	107729813	107729852	1	107729813,	107729852,
EIF4G2	EIF4G2:NM_001042559:chr11:-:131:181	chr11	-	10830400	10830451	10830400	10830451	1	10830400,	10830451,
ZBED5	ZBED5:NM_001143667:chr11:-:363:419	chr11	-	10876539	10876596	10876539	10876596	1	10876539,	10876596,
ZBED5	ZBED5:NM_001143667:chr11:-:56:70	chr11	-	10879549	10879564	10879549	10879564	1	10879549,	10879564,
RDX	RDX:NM_001260495:chr11:-:310:339	chr11	-	110118540	110150417	110118540	110150417	2	110118540,110150405,	110118558,110150417,
RDX	RDX:NM_001260492:chr11:-:0:284	chr11	-	110150442	110167437	110150442	110167437	2	110150442,110167191,	110150481,110167437,
ALG9	ALG9:NM_001077691:chr11:-:129:185	chr11	-	111741818	111741875	111741818	111741875	1	111741818,	111741875,
ALG9	ALG9:NM_001077690:chr11:-:41:67	chr11	-	111742237	111742264	111742237	111742264	1	111742237,	111742264,
IL18	IL18:NM_001243211:chr11:-:74:112	chr11	-	112034727	112034766	112034727	112034766	1	112034727,	112034766,
C11orf71	C11orf71:NM_001271562:chr11:-:141:149	chr11	-	114271122	114271131	114271122	114271131	1	114271122,	114271131,
GALNTL4	GALNTL4:NM_198516:chr11:-:64:150	chr11	-	11643410	11643497	11643410	11643497	1	11643410,	11643497,
PCSK7	PCSK7:NM_004716:chr11:-:112:201	chr11	-	117100559	117101141	117100559	117101141	2	117100559,117101064,	117100572,117101141,
PCSK7	PCSK7:NM_004716:chr11:-:71:76	chr11	-	117101176	117101182	117101176	117101182	1	117101176,	117101182,
BACE1	BACE1:NM_012104:chr11:-:55:66	chr11	-	117186905	117186917	117186905	117186917	1	117186905,	117186917,
IFT46	IFT46:NM_001168618:chr11:-:312:326	chr11	-	118435736	118435751	118435736	118435751	1	118435736,	118435751,
IFT46	IFT46:NM_001168618:chr11:-:204:224	chr11	-	118436566	118436587	118436566	118436587	1	118436566,	118436587,
IFT46	IFT46:NM_001168618:chr11:-:162:197	chr11	-	118436593	118436629	118436593	118436629	1	118436593,	118436629,
DDX6	DDX6:NM_001257191:chr11:-:156:314	chr11	-	118657006	118657165	118657006	118657165	1	118657006,	118657165,
DDX6	DDX6:NM_001257191:chr11:-:104:133	chr11	-	118657187	118657217	118657187	118657217	1	118657187,	118657217,
SLC37A4	SLC37A4:NM_001164279:chr11:-:92:397	chr11	-	118899069	118900240	118899069	118900240	3	118899069,118899444,118900101,	118899136,118899544,118900240,
DPAGT1	DPAGT1:NM_001382:chr11:-:371:385	chr11	-	118972399	118972414	118972399	118972414	1	118972399,	118972414,
CLMP	CLMP:NM_024769:chr11:-:230:328	chr11	-	123065678	123065777	123065678	123065777	1	123065678,	123065777,
CLMP	CLMP:NM_024769:chr11:-:8:97	chr11	-	123065909	123065999	123065909	123065999	1	123065909,	123065999,
ZNF202	ZNF202:NM_003455:chr11:-:58:204	chr11	-	123611146	123612305	123611146	123612305	2	123611146,123612256,	123611244,123612305,
TMEM218	TMEM218:NM_001080546:chr11:-:265:279	chr11	-	124972595	124972610	124972595	124972610	1	124972595,	124972610,
KIRREL3	KIRREL3:NM_001161707:chr11:-:247:315	chr11	-	126870450	126870519	126870450	126870519	1	126870450,	126870519,
KIRREL3	KIRREL3:NM_001161707:chr11:-:105:161	chr11	-	126870604	126870661	126870604	126870661	1	126870604,	126870661,
ETS1	ETS1:NM_001162422:chr11:-:188:253	chr11	-	128391951	128392017	128391951	128392017	1	128391951,	128392017,
ETS1	ETS1:NM_001162422:chr11:-:138:191	chr11	-	128392013	128392067	128392013	128392067	1	128392013,	128392067,
SNX19	SNX19:NM_014758:chr11:-:360:404	chr11	-	130785977	130786022	130785977	130786022	1	130785977,	130786022,
SNX19	SNX19:NM_014758:chr11:-:118:174	chr11	-	130786207	130786264	130786207	130786264	1	130786207,	130786264,
NCAPD3	NCAPD3:NM_015261:chr11:-:15:191	chr11	-	134094234	134094411	134094234	134094411	1	134094234,	134094411,
THYN1	THYN1:NM_014174:chr11:-:283:318	chr11	-	134122941	134122977	134122941	134122977	1	134122941,	134122977,
THYN1	THYN1:NM_014174:chr11:-:230:301	chr11	-	134122958	134123030	134122958	134123030	1	134122958,	134123030,
THYN1	THYN1:NM_014174:chr11:-:183:233	chr11	-	134123026	134123077	134123026	134123077	1	134123026,	134123077,
THYN1	THYN1:NM_014174:chr11:-:61:75	chr11	-	134123184	134123199	134123184	134123199	1	134123184,	134123199,
BTBD10	BTBD10:NM_032320:chr11:-:203:235	chr11	-	13466692	13466725	13466692	13466725	1	13466692,	13466725,
BTBD10	BTBD10:NM_032320:chr11:-:113:178	chr11	-	13484659	13484725	13484659	13484725	1	13484659,	13484725,
RRAS2	RRAS2:NM_012250:chr11:-:22:60	chr11	-	14380669	14380708	14380669	14380708	1	14380669,	14380708,
COPB1	COPB1:NM_001144062:chr11:-:98:145	chr11	-	14520513	14521317	14520513	14521317	2	14520513,14521287,	14520531,14521317,
COPB1	COPB1:NM_016451:chr11:-:195:215	chr11	-	14521188	14521209	14521188	14521209	1	14521188,	14521209,
COPB1	COPB1:NM_016451:chr11:-:149:187	chr11	-	14521216	14521255	14521216	14521255	1	14521216,	14521255,
HPS5	HPS5:NM_007216:chr11:-:255:377	chr11	-	18332960	18333545	18332960	18333545	2	18332960,18333460,	18332998,18333545,
HPS5	HPS5:NM_007216:chr11:-:110:241	chr11	-	18333558	18343611	18333558	18343611	2	18333558,18343492,	18333571,18343611,
HPS5	HPS5:NM_181507:chr11:-:110:232	chr11	-	18339450	18343611	18339450	18343611	2	18339450,18343492,	18339454,18343611,
HPS5	HPS5:NM_007216:chr11:-:150:209	chr11	-	18343511	18343571	18343511	18343571	1	18343511,	18343571,
UEVLD	UEVLD:NM_001261384:chr11:-:25:204	chr11	-	18588024	18610268	18588024	18610268	3	18588024,18596893,18610159,	18588029,18596959,18610268,
UEVLD	UEVLD:NM_001261384:chr11:-:92:166	chr11	-	18596926	18610201	18596926	18610201	2	18596926,18610159,	18596959,18610201,
E2F8	E2F8:NM_024680:chr11:-:322:420	chr11	-	19261769	19262185	19261769	19262185	2	19261769,19262094,	19261777,19262185,
SIRT3	SIRT3:NM_001017524:chr11:-:34:174	chr11	-	233528	236328	233528	236328	2	233528,236193,	233534,236328,
LGR4	LGR4:NM_018490:chr11:-:276:341	chr11	-	27493992	27494058	27493992	27494058	1	27493992,	27494058,
LGR4	LGR4:NM_018490:chr11:-:118:147	chr11	-	27494186	27494216	27494186	27494216	1	27494186,	27494216,
LGR4	LGR4:NM_018490:chr11:-:36:125	chr11	-	27494208	27494298	27494208	27494298	1	27494208,	27494298,
BDNF	BDNF:NM_001143813:chr11:-:188:283	chr11	-	27721751	27721847	27721751	27721847	1	27721751,	27721847,
NAP1L4	NAP1L4:NM_005969:chr11:-:119:130	chr11	-	3000460	3013488	3000460	3013488	2	3000460,3013483,	3000467,3013488,
NAP1L4	NAP1L4:NM_005969:chr11:-:36:122	chr11	-	3013484	3013571	3013484	3013571	1	3013484,	3013571,
IMMP1L	IMMP1L:NM_144981:chr11:-:72:191	chr11	-	31484827	31531097	31484827	31531097	3	31484827,31495270,31531065,	31484852,31495333,31531097,
CSTF3	CSTF3:NM_001033505:chr11:-:139:153	chr11	-	33182883	33182898	33182883	33182898	1	33182883,	33182898,
CSTF3	CSTF3:NM_001033505:chr11:-:31:75	chr11	-	33182961	33183006	33182961	33183006	1	33182961,	33183006,
CD59	CD59:NM_203330:chr11:-:239:259	chr11	-	33744008	33752989	33744008	33752989	2	33744008,33752969,	33744009,33752989,
CD59	CD59:NM_001127223:chr11:-:104:148	chr11	-	33744124	33744169	33744124	33744169	1	33744124,	33744169,
CD59	CD59:NM_001127223:chr11:-:19:72	chr11	-	33744200	33744254	33744200	33744254	1	33744200,	33744254,
CD59	CD59:NM_203330:chr11:-:227:235	chr11	-	33752992	33753001	33752992	33753001	1	33752992,	33753001,
CD59	CD59:NM_203331:chr11:-:84:104	chr11	-	33753007	33757941	33753007	33757941	2	33753007,33757927,	33753014,33757941,
CD59	CD59:NM_203330:chr11:-:71:220	chr11	-	33753007	33757954	33753007	33757954	3	33753007,33755040,33757927,	33753014,33755156,33757954,
NUP98	NUP98:NM_005387:chr11:-:258:338	chr11	-	3818683	3818764	3818683	3818764	1	3818683,	3818764,
PHF21A	PHF21A:NM_001101802:chr11:-:404:571	chr11	-	46105822	46142581	46105822	46142581	3	46105822,46113733,46142485,	46105853,46113774,46142581,
PHF21A	PHF21A:NM_001101802:chr11:-:16:99	chr11	-	46142885	46142969	46142885	46142969	1	46142885,	46142969,
AMBRA1	AMBRA1:NM_001267782:chr11:-:248:343	chr11	-	46569948	46570044	46569948	46570044	1	46569948,	46570044,
AMBRA1	AMBRA1:NM_001267782:chr11:-:132:251	chr11	-	46570040	46615487	46570040	46615487	2	46570040,46615377,	46570050,46615487,
ARHGAP1	ARHGAP1:NM_004308:chr11:-:64:81	chr11	-	46722133	46722151	46722133	46722151	1	46722133,	46722151,
PACSIN3	PACSIN3:NM_001184974:chr11:-:118:153	chr11	-	47204573	47204609	47204573	47204609	1	47204573,	47204609,
PACSIN3	PACSIN3:NM_001184975:chr11:-:167:286	chr11	-	47204573	47207265	47204573	47207265	2	47204573,47207192,	47204620,47207265,
CELF1	CELF1:NM_001172639:chr11:-:742:861	chr11	-	47521107	47522483	47521107	47522483	2	47521107,47522412,	47521156,47522483,
RNH1	RNH1:NM_002939:chr11:-:404:409	chr11	-	502225	502231	502225	502231	1	502225,	502231,
RNH1	RNH1:NM_203389:chr11:-:57:194	chr11	-	502225	507226	502225	507226	2	502225,507112,	502249,507226,
RNH1	RNH1:NM_002939:chr11:-:342:401	chr11	-	502233	504867	502233	504867	2	502233,504823,	502249,504867,
RNH1	RNH1:NM_203385:chr11:-:202:228	chr11	-	502233	506619	502233	506619	2	502233,506608,	502249,506619,
RNH1	RNH1:NM_203389:chr11:-:130:186	chr11	-	502233	507153	502233	507153	2	502233,507112,	502249,507153,
RNH1	RNH1:NM_002939:chr11:-:119:229	chr11	-	504979	506702	504979	506702	2	504979,506608,	504996,506702,
RNH1	RNH1:NM_203386:chr11:-:96:176	chr11	-	504990	507187	504990	507187	2	504990,507112,	504996,507187,
RNH1	RNH1:NM_002939:chr11:-:80:115	chr11	-	506705	506741	506705	506741	1	506705,	506741,
HRAS	HRAS:NM_001130442:chr11:-:135:155	chr11	-	534354	534375	534354	534375	1	534354,	534375,
TRIM5	TRIM5:NM_033034:chr11:-:289:297	chr11	-	5701412	5701421	5701412	5701421	1	5701412,	5701421,
TRIM5	TRIM5:NM_033034:chr11:-:246:251	chr11	-	5701458	5701464	5701458	5701464	1	5701458,	5701464,
TNKS1BP1	TNKS1BP1:NM_033396:chr11:-:160:165	chr11	-	57089358	57089364	57089358	57089364	1	57089358,	57089364,
SLC43A3	SLC43A3:NM_014096:chr11:-:251:271	chr11	-	57193783	57193804	57193783	57193804	1	57193783,	57193804,
SLC43A3	SLC43A3:NM_014096:chr11:-:18:251	chr11	-	57193803	57194505	57193803	57194505	3	57193803,57194060,57194358,	57193825,57194125,57194505,
SLC43A3	SLC43A3:NM_199329:chr11:-:12:146	chr11	-	57193803	57194582	57193803	57194582	3	57193803,57194060,57194534,	57193825,57194125,57194582,
SLC43A3	SLC43A3:NM_017611:chr11:-:35:124	chr11	-	57193803	57195018	57193803	57195018	3	57193803,57194060,57195015,	57193825,57194125,57195018,
TIMM10	TIMM10:NM_012456:chr11:-:134:145	chr11	-	57297663	57297675	57297663	57297675	1	57297663,	57297675,
TIMM10	TIMM10:NM_012456:chr11:-:99:107	chr11	-	57297701	57298133	57297701	57298133	2	57297701,57298130,	57297707,57298133,
LPXN	LPXN:NM_004811:chr11:-:90:140	chr11	-	58343249	58343300	58343249	58343300	1	58343249,	58343300,
CYBASC3	CYBASC3:NM_001161454:chr11:-:564:626	chr11	-	61125224	61125287	61125224	61125287	1	61125224,	61125287,
CYBASC3	CYBASC3:NM_001161454:chr11:-:551:574	chr11	-	61125276	61125300	61125276	61125300	1	61125276,	61125300,
CYBASC3	CYBASC3:NM_001161454:chr11:-:541:570	chr11	-	61125280	61129214	61125280	61129214	2	61125280,61129204,	61125300,61129214,
CYBASC3	CYBASC3:NM_001161454:chr11:-:3:86	chr11	-	61129668	61129752	61129668	61129752	1	61129668,	61129752,
AHNAK	AHNAK:NM_001620:chr11:-:172:192	chr11	-	62314139	62314160	62314139	62314160	1	62314139,	62314160,
BSCL2	BSCL2:NM_001130702:chr11:-:97:171	chr11	-	62473030	62473690	62473030	62473690	2	62473030,62473674,	62473089,62473690,
FAM160A2	FAM160A2:NM_001098794:chr11:-:92:106	chr11	-	6255834	6255849	6255834	6255849	1	6255834,	6255849,
ATL3	ATL3:NM_015459:chr11:-:245:262	chr11	-	63438820	63438838	63438820	63438838	1	63438820,	63438838,
ATL3	ATL3:NM_015459:chr11:-:13:168	chr11	-	63438914	63439070	63438914	63439070	1	63438914,	63439070,
TRPT1	TRPT1:NM_001033678:chr11:-:323:346	chr11	-	63992994	63993018	63992994	63993018	1	63992994,	63993018,
PPP1R14B	PPP1R14B:NM_138689:chr11:-:114:188	chr11	-	64014224	64014299	64014224	64014299	1	64014224,	64014299,
BAD	BAD:NM_004322:chr11:-:195:311	chr11	-	64051864	64051981	64051864	64051981	1	64051864,	64051981,
APBB1	APBB1:NM_001164:chr11:-:40:78	chr11	-	6440253	6440292	6440253	6440292	1	6440253,	6440292,
SF1	SF1:NM_004630:chr11:-:88:186	chr11	-	64546129	64546228	64546129	64546228	1	64546129,	64546228,
MAP3K11	MAP3K11:NM_002419:chr11:-:84:281	chr11	-	65381438	65381636	65381438	65381636	1	65381438,	65381636,
RELA	RELA:NM_001145138:chr11:-:73:87	chr11	-	65430355	65430370	65430355	65430370	1	65430355,	65430370,
EIF1AD	EIF1AD:NM_001242482:chr11:-:173:274	chr11	-	65767934	65769464	65767934	65769464	2	65767934,65769380,	65767952,65769464,
EIF1AD	EIF1AD:NM_001242481:chr11:-:173:259	chr11	-	65767973	65769464	65767973	65769464	2	65767973,65769380,	65767976,65769464,
EIF1AD	EIF1AD:NM_001242481:chr11:-:92:106	chr11	-	65769530	65769545	65769530	65769545	1	65769530,	65769545,
YIF1A	YIF1A:NM_020470:chr11:-:6:125	chr11	-	66056512	66056632	66056512	66056632	1	66056512,	66056632,
TMEM134	TMEM134:NM_001078650:chr11:-:48:71	chr11	-	67236676	67236700	67236676	67236700	1	67236676,	67236700,
PITPNM1	PITPNM1:NM_001130848:chr11:-:48:161	chr11	-	67272681	67272795	67272681	67272795	1	67272681,	67272795,
C11orf24	C11orf24:NM_022338:chr11:-:145:330	chr11	-	68035533	68035719	68035533	68035719	1	68035533,	68035719,
MRPL21	MRPL21:NM_181514:chr11:-:173:193	chr11	-	68665457	68665478	68665457	68665478	1	68665457,	68665478,
MRPL21	MRPL21:NM_181515:chr11:-:25:174	chr11	-	68668011	68671278	68668011	68671278	2	68668011,68671190,	68668073,68671278,
DHCR7	DHCR7:NM_001163817:chr11:-:212:220	chr11	-	71158678	71158687	71158678	71158687	1	71158678,	71158687,
DHCR7	DHCR7:NM_001360:chr11:-:132:149	chr11	-	71158772	71159345	71158772	71159345	2	71158772,71159335,	71158780,71159345,
NUMA1	NUMA1:NM_006185:chr11:-:145:153	chr11	-	71747007	71747016	71747007	71747016	1	71747007,	71747016,
NUMA1	NUMA1:NM_006185:chr11:-:93:116	chr11	-	71780910	71780934	71780910	71780934	1	71780910,	71780934,
ANAPC15	ANAPC15:NM_014042:chr11:-:34:159	chr11	-	71822509	71823788	71822509	71823788	2	71822509,71823695,	71822542,71823788,
ARAP1	ARAP1:NM_001040118:chr11:-:868:924	chr11	-	72424231	72424288	72424231	72424288	1	72424231,	72424288,
ARAP1	ARAP1:NM_001135190:chr11:-:318:506	chr11	-	72432896	72433085	72432896	72433085	1	72432896,	72433085,
ARAP1	ARAP1:NM_001135190:chr11:-:29:265	chr11	-	72433137	72433374	72433137	72433374	1	72433137,	72433374,
ARAP1	ARAP1:NM_001040118:chr11:-:80:100	chr11	-	72443603	72443624	72443603	72443624	1	72443603,	72443624,
RAB6A	RAB6A:NM_001243718:chr11:-:313:513	chr11	-	73471687	73471888	73471687	73471888	1	73471687,	73471888,
RAB6A	RAB6A:NM_001243718:chr11:-:117:236	chr11	-	73471964	73472084	73471964	73472084	1	73471964,	73472084,
COA4	COA4:NM_016565:chr11:-:5:52	chr11	-	73587837	73587885	73587837	73587885	1	73587837,	73587885,
UCP2	UCP2:NM_003355:chr11:-:134:244	chr11	-	73692556	73692667	73692556	73692667	1	73692556,	73692667,
XRRA1	XRRA1:NM_001270381:chr11:-:128:277	chr11	-	74648095	74660104	74648095	74660104	2	74648095,74659972,	74648113,74660104,
NDUFC2-KCTD14	NDUFC2-KCTD14:NM_001203260:chr11:-:427:432	chr11	-	77790832	77790838	77790832	77790838	1	77790832,	77790838,
NDUFC2-KCTD14	NDUFC2-KCTD14:NM_001203260:chr11:-:387:398	chr11	-	77790866	77790878	77790866	77790878	1	77790866,	77790878,
NARS2	NARS2:NM_024678:chr11:-:173:298	chr11	-	78285610	78285736	78285610	78285736	1	78285610,	78285736,
SLC25A22	SLC25A22:NM_001191060:chr11:-:502:546	chr11	-	795006	795051	795006	795051	1	795006,	795051,
SLC25A22	SLC25A22:NM_024698:chr11:-:183:260	chr11	-	795129	796080	795129	796080	2	795129,796042,	795169,796080,
SLC25A22	SLC25A22:NM_001191060:chr11:-:331:423	chr11	-	795129	797664	795129	797664	2	795129,797611,	795169,797664,
SLC25A22	SLC25A22:NM_001191061:chr11:-:3:92	chr11	-	795129	798266	795129	798266	2	795129,798216,	795169,798266,
SLC25A22	SLC25A22:NM_024698:chr11:-:126:170	chr11	-	796092	796137	796092	796137	1	796092,	796137,
CCDC90B	CCDC90B:NM_021825:chr11:-:2:100	chr11	-	82997276	82997375	82997276	82997375	1	82997276,	82997375,
SYTL2	SYTL2:NM_206929:chr11:-:114:182	chr11	-	85429867	85430082	85429867	85430082	2	85429867,85430032,	85429886,85430082,
SYTL2	SYTL2:NM_001162952:chr11:-:301:396	chr11	-	85429986	85430082	85429986	85430082	1	85429986,	85430082,
PICALM	PICALM:NM_001206947:chr11:-:33:116	chr11	-	85780806	85780890	85780806	85780890	1	85780806,	85780890,
ST5	ST5:NM_005418:chr11:-:276:329	chr11	-	8832824	8832878	8832824	8832878	1	8832824,	8832878,
CHID1	CHID1:NM_001142675:chr11:-:341:346	chr11	-	904826	904832	904826	904832	1	904826,	904832,
CHID1	CHID1:NM_001142674:chr11:-:159:236	chr11	-	904826	908586	904826	908586	2	904826,908541,	904859,908586,
CHID1	CHID1:NM_001142676:chr11:-:94:132	chr11	-	904826	910780	904826	910780	2	904826,910774,	904859,910780,
CHID1	CHID1:NM_001142674:chr11:-:94:177	chr11	-	908567	910780	908567	910780	2	908567,910774,	908645,910780,
DENND5A	DENND5A:NM_001243254:chr11:-:52:153	chr11	-	9286719	9286821	9286719	9286821	1	9286719,	9286821,
C11orf75	C11orf75:NM_020179:chr11:-:190:252	chr11	-	93212360	93212423	93212360	93212423	1	93212360,	93212423,
TAF1D	TAF1D:NM_024116:chr11:-:190:243	chr11	-	93472469	93474513	93472469	93474513	2	93472469,93474487,	93472497,93474513,
MRE11A	MRE11A:NM_005591:chr11:-:157:180	chr11	-	94225975	94225999	94225975	94225999	1	94225975,	94225999,
MRE11A	MRE11A:NM_005590:chr11:-:186:287	chr11	-	94225975	94226854	94225975	94226854	2	94225975,94226849,	94226072,94226854,
MRE11A	MRE11A:NM_005590:chr11:-:203:232	chr11	-	94226030	94226060	94226030	94226060	1	94226030,	94226060,
CWC15	CWC15:NM_016403:chr11:-:66:80	chr11	-	94706695	94706710	94706695	94706710	1	94706695,	94706710,
MTMR2	MTMR2:NM_201278:chr11:-:432:533	chr11	-	95615636	95621397	95615636	95621397	2	95615636,95621319,	95615660,95621397,
MTMR2	MTMR2:NM_001243571:chr11:-:432:584	chr11	-	95615658	95621397	95615658	95621397	3	95615658,95620775,95621319,	95615660,95620848,95621397,
MTMR2	MTMR2:NM_001243571:chr11:-:253:336	chr11	-	95647472	95657118	95647472	95657118	2	95647472,95657038,	95647476,95657118,
MAML2	MAML2:NM_032427:chr11:-:166:276	chr11	-	96076067	96076178	96076067	96076178	1	96076067,	96076178,
MAML2	MAML2:NM_032427:chr11:-:22:45	chr11	-	96076298	96076322	96076298	96076322	1	96076298,	96076322,
CCDC82	CCDC82:NM_024725:chr11:-:26:211	chr11	-	96117913	96123057	96117913	96123057	4	96117913,96119417,96120693,96123007,	96117925,96119457,96120777,96123057,
CCDC82	CCDC82:NM_024725:chr11:-:184:195	chr11	-	96119421	96119433	96119421	96119433	1	96119421,	96119433,
GAS2L3	GAS2L3:NM_174942:chr12:+:37:60	chr12	+	100967525	100967549	100967525	100967549	1	100967525,	100967549,
GAS2L3	GAS2L3:NM_174942:chr12:+:48:122	chr12	+	100967536	100985561	100967536	100985561	2	100967536,100985513,	100967563,100985561,
UTP20	UTP20:NM_014503:chr12:+:3:35	chr12	+	101673907	101673940	101673907	101673940	1	101673907,	101673940,
PARPBP	PARPBP:NM_017915:chr12:+:74:112	chr12	+	102514029	102517667	102514029	102517667	2	102514029,102517663,	102514064,102517667,
GABARAPL1	GABARAPL1:NM_031412:chr12:+:34:147	chr12	+	10365522	10365636	10365522	10365636	1	10365522,	10365636,
HSP90B1	HSP90B1:NM_003299:chr12:+:94:105	chr12	+	104324205	104324217	104324205	104324217	1	104324205,	104324217,
TXNRD1	TXNRD1:NM_001261446:chr12:+:400:429	chr12	+	104680859	104682710	104680859	104682710	2	104680859,104682708,	104680887,104682710,
TXNRD1	TXNRD1:NM_001261445:chr12:+:403:447	chr12	+	104680862	104680907	104680862	104680907	1	104680862,	104680907,
TXNRD1	TXNRD1:NM_001261445:chr12:+:474:566	chr12	+	104680933	104681026	104680933	104681026	1	104680933,	104681026,
CHST11	CHST11:NM_001173982:chr12:+:79:87	chr12	+	104850770	104850779	104850770	104850779	1	104850770,	104850779,
C12orf23	C12orf23:NM_152261:chr12:+:162:323	chr12	+	107349705	107350883	107349705	107350883	2	107349705,107350859,	107349843,107350883,
BTBD11	BTBD11:NM_001018072:chr12:+:181:402	chr12	+	107712377	107712599	107712377	107712599	1	107712377,	107712599,
BTBD11	BTBD11:NM_001018072:chr12:+:317:382	chr12	+	107712513	107712579	107712513	107712579	1	107712513,	107712579,
PWP1	PWP1:NM_007062:chr12:+:43:60	chr12	+	108079632	108079650	108079632	108079650	1	108079632,	108079650,
PWP1	PWP1:NM_007062:chr12:+:62:76	chr12	+	108079651	108079666	108079651	108079666	1	108079651,	108079666,
ISCU	ISCU:NM_014301:chr12:+:105:245	chr12	+	108956398	108957862	108956398	108957862	2	108956398,108957835,	108956512,108957862,
UBE3B	UBE3B:NM_001270449:chr12:+:28:87	chr12	+	109915455	109915515	109915455	109915515	1	109915455,	109915515,
UBE3B	UBE3B:NM_001270449:chr12:+:379:480	chr12	+	109915806	109915908	109915806	109915908	1	109915806,	109915908,
FAM216A	FAM216A:NM_013300:chr12:+:24:125	chr12	+	110906255	110906357	110906255	110906357	1	110906255,	110906357,
TCTN1	TCTN1:NM_001173975:chr12:+:44:79	chr12	+	111051955	111051991	111051955	111051991	1	111051955,	111051991,
TCTN1	TCTN1:NM_001173976:chr12:+:156:407	chr12	+	111051987	111054113	111051987	111054113	2	111051987,111054081,	111052207,111054113,
SH2B3	SH2B3:NM_005475:chr12:+:67:141	chr12	+	111843818	111843893	111843818	111843893	1	111843818,	111843893,
SH2B3	SH2B3:NM_005475:chr12:+:138:182	chr12	+	111843889	111843934	111843889	111843934	1	111843889,	111843934,
MAPKAPK5	MAPKAPK5:NM_003668:chr12:+:8:76	chr12	+	112280286	112280355	112280286	112280355	1	112280286,	112280355,
PTPN11	PTPN11:NM_002834:chr12:+:312:317	chr12	+	112856847	112856853	112856847	112856853	1	112856847,	112856853,
OAS2	OAS2:NM_001032731:chr12:+:90:134	chr12	+	113416363	113416408	113416363	113416408	1	113416363,	113416408,
C12orf52	C12orf52:NM_032848:chr12:+:17:73	chr12	+	113623571	113623628	113623571	113623628	1	113623571,	113623628,
C12orf52	C12orf52:NM_032848:chr12:+:165:239	chr12	+	113623719	113623794	113623719	113623794	1	113623719,	113623794,
C12orf52	C12orf52:NM_032848:chr12:+:248:298	chr12	+	113623802	113624016	113623802	113624016	2	113623802,113623989,	113623826,113624016,
C12orf52	C12orf52:NM_032848:chr12:+:264:317	chr12	+	113623818	113624035	113623818	113624035	2	113623818,113623989,	113623826,113624035,
TPCN1	TPCN1:NM_001143819:chr12:+:268:369	chr12	+	113664535	113664637	113664535	113664637	1	113664535,	113664637,
ERC1	ERC1:NM_178039:chr12:+:87:95	chr12	+	1136915	1136924	1136915	1136924	1	1136915,	1136924,
SDSL	SDSL:NM_138432:chr12:+:16:54	chr12	+	113860231	113860270	113860231	113860270	1	113860231,	113860270,
RNFT2	RNFT2:NM_001109903:chr12:+:192:227	chr12	+	117178261	117178297	117178261	117178297	1	117178261,	117178297,
ETV6	ETV6:NM_001987:chr12:+:154:174	chr12	+	11802941	11802962	11802941	11802962	1	11802941,	11802962,
ETV6	ETV6:NM_001987:chr12:+:175:255	chr12	+	11802962	11803043	11802962	11803043	1	11802962,	11803043,
RFC5	RFC5:NM_001130112:chr12:+:58:84	chr12	+	118454563	118454590	118454563	118454590	1	118454563,	118454590,
RFC5	RFC5:NM_001130112:chr12:+:127:192	chr12	+	118454632	118455495	118454632	118455495	2	118454632,118455494,	118454697,118455495,
DYNLL1	DYNLL1:NM_001037494:chr12:+:27:134	chr12	+	120907686	120907794	120907686	120907794	1	120907686,	120907794,
DYNLL1	DYNLL1:NM_001037495:chr12:+:59:103	chr12	+	120933917	120933962	120933917	120933962	1	120933917,	120933962,
DYNLL1	DYNLL1:NM_001037495:chr12:+:105:113	chr12	+	120933963	120933972	120933963	120933972	1	120933963,	120933972,
RNF10	RNF10:NM_014868:chr12:+:360:371	chr12	+	120972491	120972503	120972491	120972503	1	120972491,	120972503,
MLEC	MLEC:NM_014730:chr12:+:34:81	chr12	+	121124982	121125030	121124982	121125030	1	121124982,	121125030,
RNF34	RNF34:NM_001256858:chr12:+:80:133	chr12	+	121837965	121838019	121837965	121838019	1	121837965,	121838019,
DENR	DENR:NM_003677:chr12:+:63:86	chr12	+	123237433	123237457	123237433	123237457	1	123237433,	123237457,
DENR	DENR:NM_003677:chr12:+:111:134	chr12	+	123237481	123238247	123237481	123238247	2	123237481,123238239,	123237497,123238247,
OGFOD2	OGFOD2:NM_024623:chr12:+:12:125	chr12	+	123459365	123459479	123459365	123459479	1	123459365,	123459479,
OGFOD2	OGFOD2:NM_024623:chr12:+:16:228	chr12	+	123459369	123459582	123459369	123459582	1	123459369,	123459582,
TCTN2	TCTN2:NM_001143850:chr12:+:25:66	chr12	+	124155684	124155726	124155684	124155726	1	124155684,	124155726,
ZNF664-FAM101A	ZNF664-FAM101A:NM_001204299:chr12:+:182:244	chr12	+	124458476	124458539	124458476	124458539	1	124458476,	124458539,
ZNF664	ZNF664:NM_001204298:chr12:+:319:474	chr12	+	124495929	124496189	124495929	124496189	2	124495929,124496092,	124495988,124496189,
ZNF664	ZNF664:NM_001204298:chr12:+:386:400	chr12	+	124496100	124496115	124496100	124496115	1	124496100,	124496115,
ZNF664	ZNF664:NM_001204298:chr12:+:474:683	chr12	+	124496188	124496398	124496188	124496398	1	124496188,	124496398,
ZNF664	ZNF664:NM_001204298:chr12:+:490:501	chr12	+	124496204	124496216	124496204	124496216	1	124496204,	124496216,
ZNF664	ZNF664:NM_001204298:chr12:+:677:757	chr12	+	124496391	124496472	124496391	124496472	1	124496391,	124496472,
ZNF664	ZNF664:NM_001204298:chr12:+:786:872	chr12	+	124496500	124496587	124496500	124496587	1	124496500,	124496587,
CREBL2	CREBL2:NM_001310:chr12:+:25:102	chr12	+	12764855	12764933	12764855	12764933	1	12764855,	12764933,
CREBL2	CREBL2:NM_001310:chr12:+:126:221	chr12	+	12764956	12765052	12764956	12765052	1	12764956,	12765052,
CDKN1B	CDKN1B:NM_004064:chr12:+:166:399	chr12	+	12870467	12870701	12870467	12870701	1	12870467,	12870701,
CDKN1B	CDKN1B:NM_004064:chr12:+:368:433	chr12	+	12870669	12870735	12870669	12870735	1	12870669,	12870735,
SFSWAP	SFSWAP:NM_001261411:chr12:+:18:65	chr12	+	132195649	132195697	132195649	132195697	1	132195649,	132195697,
PUS1	PUS1:NM_025215:chr12:+:25:141	chr12	+	132413837	132413954	132413837	132413954	1	132413837,	132413954,
PUS1	PUS1:NM_025215:chr12:+:113:169	chr12	+	132413925	132413982	132413925	132413982	1	132413925,	132413982,
PUS1	PUS1:NM_025215:chr12:+:251:373	chr12	+	132414063	132414186	132414063	132414186	1	132414063,	132414186,
EP400	EP400:NM_015409:chr12:+:105:149	chr12	+	132434569	132445162	132434569	132445162	2	132434569,132445129,	132434581,132445162,
ZNF140	ZNF140:NM_003440:chr12:+:526:621	chr12	+	133657562	133657658	133657562	133657658	1	133657562,	133657658,
ZNF268	ZNF268:NM_001165882:chr12:+:206:283	chr12	+	133758583	133764495	133758583	133764495	2	133758583,133764450,	133758616,133764495,
H2AFJ	H2AFJ:NM_177925:chr12:+:98:121	chr12	+	14927367	14927391	14927367	14927391	1	14927367,	14927391,
STRAP	STRAP:NM_007178:chr12:+:51:71	chr12	+	16035338	16035359	16035338	16035359	1	16035338,	16035359,
STRAP	STRAP:NM_007178:chr12:+:75:197	chr12	+	16035362	16035485	16035362	16035485	1	16035362,	16035485,
MGST1	MGST1:NM_145791:chr12:+:5:91	chr12	+	16500716	16500803	16500716	16500803	1	16500716,	16500803,
MGST1	MGST1:NM_145791:chr12:+:115:138	chr12	+	16500826	16507182	16500826	16507182	2	16500826,16507164,	16500832,16507182,
ADIPOR2	ADIPOR2:NM_024551:chr12:+:83:178	chr12	+	1800329	1863491	1800329	1863491	2	1800329,1863423,	1800357,1863491,
C12orf39	C12orf39:NM_030572:chr12:+:8:112	chr12	+	21679263	21679368	21679263	21679368	1	21679263,	21679368,
RASSF8	RASSF8:NM_001164748:chr12:+:114:164	chr12	+	26112077	26208215	26112077	26208215	2	26112077,26208168,	26112081,26208215,
RASSF8	RASSF8:NM_007211:chr12:+:155:229	chr12	+	26148006	26208186	26148006	26208186	2	26148006,26208168,	26148063,26208186,
RASSF8	RASSF8:NM_001164746:chr12:+:490:498	chr12	+	26208219	26208228	26208219	26208228	1	26208219,	26208228,
FGFR1OP2	FGFR1OP2:NM_001171887:chr12:+:154:225	chr12	+	27091458	27091530	27091458	27091530	1	27091458,	27091530,
FGFR1OP2	FGFR1OP2:NM_001171887:chr12:+:311:331	chr12	+	27091615	27091636	27091615	27091636	1	27091615,	27091636,
PPFIBP1	PPFIBP1:NM_001198915:chr12:+:105:113	chr12	+	27677149	27677158	27677149	27677158	1	27677149,	27677158,
PPFIBP1	PPFIBP1:NM_001198915:chr12:+:113:229	chr12	+	27677157	27677274	27677157	27677274	1	27677157,	27677274,
PPFIBP1	PPFIBP1:NM_001198915:chr12:+:267:308	chr12	+	27731097	27731139	27731097	27731139	1	27731097,	27731139,
PPFIBP1	PPFIBP1:NM_001198915:chr12:+:277:300	chr12	+	27731107	27731131	27731107	27731131	1	27731107,	27731131,
PPFIBP1	PPFIBP1:NM_001198916:chr12:+:349:372	chr12	+	27786301	27786325	27786301	27786325	1	27786301,	27786325,
TEAD4	TEAD4:NM_003213:chr12:+:193:228	chr12	+	3069136	3069172	3069136	3069172	1	3069136,	3069172,
TEAD4	TEAD4:NM_201443:chr12:+:450:473	chr12	+	3069197	3120184	3069197	3120184	2	3069197,3120169,	3069206,3120184,
KIAA1551	KIAA1551:NM_018169:chr12:+:124:153	chr12	+	32113761	32113791	32113761	32113791	1	32113761,	32113791,
FGD4	FGD4:NM_139241:chr12:+:301:336	chr12	+	32717139	32717175	32717139	32717175	1	32717139,	32717175,
PPHLN1	PPHLN1:NM_201438:chr12:+:1:117	chr12	+	42719947	42726494	42719947	42726494	2	42719947,42726461,	42720031,42726494,
IRAK4	IRAK4:NM_001145256:chr12:+:130:312	chr12	+	44161914	44166004	44161914	44166004	2	44161914,44165982,	44162075,44166004,
ANO6	ANO6:NM_001025356:chr12:+:102:218	chr12	+	45609871	45609988	45609871	45609988	1	45609871,	45609988,
ANO6	ANO6:NM_001025356:chr12:+:277:327	chr12	+	45610046	45610097	45610046	45610097	1	45610046,	45610097,
PCED1B	PCED1B:NM_138371:chr12:+:217:375	chr12	+	47610268	47610427	47610268	47610427	1	47610268,	47610427,
TROAP	TROAP:NM_001100620:chr12:+:62:82	chr12	+	49717032	49717053	49717032	49717053	1	49717032,	49717053,
TROAP	TROAP:NM_001100620:chr12:+:133:147	chr12	+	49717103	49717118	49717103	49717118	1	49717103,	49717118,
SPATS2	SPATS2:NM_023071:chr12:+:506:682	chr12	+	49761193	49761370	49761193	49761370	1	49761193,	49761370,
SPATS2	SPATS2:NM_023071:chr12:+:716:793	chr12	+	49765043	49854600	49765043	49854600	2	49765043,49854552,	49765073,49854600,
COX14	COX14:NM_001257133:chr12:+:219:281	chr12	+	50505982	50506045	50505982	50506045	1	50505982,	50506045,
COX14	COX14:NM_001257133:chr12:+:297:341	chr12	+	50506060	50512296	50506060	50512296	2	50506060,50512275,	50506084,50512296,
ATF1	ATF1:NM_005171:chr12:+:87:131	chr12	+	51157875	51157920	51157875	51157920	1	51157875,	51157920,
METTL7A	METTL7A:NM_014033:chr12:+:88:129	chr12	+	51318621	51318663	51318621	51318663	1	51318621,	51318663,
DAZAP2	DAZAP2:NM_001136264:chr12:+:98:103	chr12	+	51632605	51632611	51632605	51632611	1	51632605,	51632611,
C12orf44	C12orf44:NM_021934:chr12:+:36:113	chr12	+	52463793	52463871	52463793	52463871	1	52463793,	52463871,
C12orf44	C12orf44:NM_021934:chr12:+:89:304	chr12	+	52463846	52464173	52463846	52464173	2	52463846,52464137,	52464026,52464173,
C12orf44	C12orf44:NM_021934:chr12:+:256:336	chr12	+	52464013	52464205	52464013	52464205	2	52464013,52464137,	52464026,52464205,
C12orf44	C12orf44:NM_001098673:chr12:+:121:165	chr12	+	52464160	52464205	52464160	52464205	1	52464160,	52464205,
C12orf44	C12orf44:NM_001098673:chr12:+:183:197	chr12	+	52464222	52464237	52464222	52464237	1	52464222,	52464237,
ZNF740	ZNF740:NM_001004304:chr12:+:25:147	chr12	+	53574559	53575521	53574559	53575521	2	53574559,53575460,	53574621,53575521,
ZNF740	ZNF740:NM_001004304:chr12:+:141:233	chr12	+	53575514	53575607	53575514	53575607	1	53575514,	53575607,
ZNF740	ZNF740:NM_001004304:chr12:+:259:309	chr12	+	53575632	53575683	53575632	53575683	1	53575632,	53575683,
PCBP2	PCBP2:NM_001098620:chr12:+:269:301	chr12	+	53846154	53848536	53846154	53848536	2	53846154,53848509,	53846160,53848536,
HOXC4	HOXC4:NM_014620:chr12:+:207:422	chr12	+	54410848	54411064	54410848	54411064	1	54410848,	54411064,
HOXC6	HOXC6:NM_153693:chr12:+:438:605	chr12	+	54411079	54422408	54411079	54422408	2	54411079,54422359,	54411198,54422408,
COPZ1	COPZ1:NM_001271736:chr12:+:74:106	chr12	+	54718947	54734261	54718947	54734261	2	54718947,54734246,	54718965,54734261,
RAB5B	RAB5B:NM_001252037:chr12:+:84:137	chr12	+	56367878	56380661	56367878	56380661	2	56367878,56380652,	56367923,56380661,
SUOX	SUOX:NM_000456:chr12:+:9:188	chr12	+	56391051	56391506	56391051	56391506	2	56391051,56391398,	56391123,56391506,
RPS26	RPS26:NM_001029:chr12:+:64:75	chr12	+	56435749	56435761	56435749	56435761	1	56435749,	56435761,
RPS26	RPS26:NM_001029:chr12:+:114:161	chr12	+	56435799	56435847	56435799	56435847	1	56435799,	56435847,
ERBB3	ERBB3:NM_001005915:chr12:+:115:138	chr12	+	56474006	56474030	56474006	56474030	1	56474006,	56474030,
PA2G4	PA2G4:NM_006191:chr12:+:349:411	chr12	+	56498451	56498514	56498451	56498514	1	56498451,	56498514,
RPL41	RPL41:NM_001035267:chr12:+:74:157	chr12	+	56510447	56510531	56510447	56510531	1	56510447,	56510531,
RPL41	RPL41:NM_001035267:chr12:+:158:163	chr12	+	56510531	56510537	56510531	56510537	1	56510531,	56510537,
RPL41	RPL41:NM_001035267:chr12:+:179:184	chr12	+	56510552	56510558	56510552	56510558	1	56510552,	56510558,
ZC3H10	ZC3H10:NM_032786:chr12:+:85:126	chr12	+	56512883	56512925	56512883	56512925	1	56512883,	56512925,
SHMT2	SHMT2:NM_001166356:chr12:+:152:163	chr12	+	57623507	57623519	57623507	57623519	1	57623507,	57623519,
SHMT2	SHMT2:NM_001166358:chr12:+:124:177	chr12	+	57623951	57624005	57623951	57624005	1	57623951,	57624005,
DTX3	DTX3:NM_178502:chr12:+:19:72	chr12	+	57998622	57999388	57998622	57999388	2	57998622,57999353,	57998641,57999388,
SLC16A7	SLC16A7:NM_001270622:chr12:+:138:209	chr12	+	59989958	60048945	59989958	60048945	2	59989958,60048932,	59990017,60048945,
SLC16A7	SLC16A7:NM_001270622:chr12:+:211:216	chr12	+	60048946	60048952	60048946	60048952	1	60048946,	60048952,
TMEM5	TMEM5:NM_014254:chr12:+:75:86	chr12	+	64173711	64173723	64173711	64173723	1	64173711,	64173723,
XPOT	XPOT:NM_007235:chr12:+:286:297	chr12	+	64798438	64798450	64798438	64798450	1	64798438,	64798450,
XPOT	XPOT:NM_007235:chr12:+:415:423	chr12	+	64798567	64798576	64798567	64798576	1	64798567,	64798576,
XPOT	XPOT:NM_007235:chr12:+:432:497	chr12	+	64803741	64803807	64803741	64803807	1	64803741,	64803807,
MSRB3	MSRB3:NM_001193460:chr12:+:126:227	chr12	+	65672548	65700647	65672548	65700647	2	65672548,65700642,	65672645,65700647,
MSRB3	MSRB3:NM_001031679:chr12:+:126:260	chr12	+	65672548	65702346	65672548	65702346	2	65672548,65702308,	65672645,65702346,
NCAPD2	NCAPD2:NM_014865:chr12:+:27:38	chr12	+	6604245	6604257	6604245	6604257	1	6604245,	6604257,
HMGA2	HMGA2:NM_003483:chr12:+:165:434	chr12	+	66218404	66218674	66218404	66218674	1	66218404,	66218674,
HMGA2	HMGA2:NM_003483:chr12:+:640:663	chr12	+	66218879	66218903	66218879	66218903	1	66218879,	66218903,
HMGA2	HMGA2:NM_003483:chr12:+:743:793	chr12	+	66218982	66219033	66218982	66219033	1	66218982,	66219033,
CAND1	CAND1:NM_018448:chr12:+:178:213	chr12	+	67663238	67663274	67663238	67663274	1	67663238,	67663274,
DYRK2	DYRK2:NM_003583:chr12:+:135:344	chr12	+	68042646	68042856	68042646	68042856	1	68042646,	68042856,
DYRK2	DYRK2:NM_003583:chr12:+:402:464	chr12	+	68042913	68050899	68042913	68050899	2	68042913,68050885,	68042962,68050899,
COPS7A	COPS7A:NM_016319:chr12:+:33:182	chr12	+	6833212	6833823	6833212	6833823	2	6833212,6833779,	6833318,6833823,
COPS7A	COPS7A:NM_001164094:chr12:+:63:239	chr12	+	6833212	6833823	6833212	6833823	2	6833212,6833779,	6833345,6833823,
COPS7A	COPS7A:NM_001164094:chr12:+:88:123	chr12	+	6833237	6833273	6833237	6833273	1	6833237,	6833273,
COPS7A	COPS7A:NM_001164094:chr12:+:149:172	chr12	+	6833298	6833322	6833298	6833322	1	6833298,	6833322,
COPS7A	COPS7A:NM_001164095:chr12:+:135:215	chr12	+	6833379	6833823	6833379	6833823	2	6833379,6833779,	6833416,6833823,
COPS7A	COPS7A:NM_001164093:chr12:+:21:32	chr12	+	6833469	6833481	6833469	6833481	1	6833469,	6833481,
COPS7A	COPS7A:NM_001164093:chr12:+:57:131	chr12	+	6833505	6833580	6833505	6833580	1	6833505,	6833580,
COPS7A	COPS7A:NM_001164093:chr12:+:91:219	chr12	+	6833539	6833668	6833539	6833668	1	6833539,	6833668,
COPS7A	COPS7A:NM_001164093:chr12:+:216:374	chr12	+	6833664	6833823	6833664	6833823	1	6833664,	6833823,
RAP1B	RAP1B:NM_001010942:chr12:+:47:193	chr12	+	69004665	69004812	69004665	69004812	1	69004665,	69004812,
RAP1B	RAP1B:NM_001010942:chr12:+:90:95	chr12	+	69004708	69004714	69004708	69004714	1	69004708,	69004714,
RAP1B	RAP1B:NM_001010942:chr12:+:190:201	chr12	+	69004808	69004820	69004808	69004820	1	69004808,	69004820,
RAP1B	RAP1B:NM_001010942:chr12:+:198:218	chr12	+	69004816	69042492	69004816	69042492	2	69004816,69042478,	69004823,69042492,
RAP1B	RAP1B:NM_001251917:chr12:+:198:227	chr12	+	69004816	69042492	69004816	69042492	2	69004816,69042478,	69004832,69042492,
MDM2	MDM2:NM_002392:chr12:+:56:100	chr12	+	69202026	69202071	69202026	69202071	1	69202026,	69202071,
MDM2	MDM2:NM_002392:chr12:+:190:234	chr12	+	69202160	69202205	69202160	69202205	1	69202160,	69202205,
YEATS4	YEATS4:NM_006530:chr12:+:27:62	chr12	+	69753558	69753594	69753558	69753594	1	69753558,	69753594,
YEATS4	YEATS4:NM_006530:chr12:+:59:91	chr12	+	69753590	69753623	69753590	69753623	1	69753590,	69753623,
FRS2	FRS2:NM_001042555:chr12:+:245:262	chr12	+	69924646	69924664	69924646	69924664	1	69924646,	69924664,
FRS2	FRS2:NM_006654:chr12:+:250:393	chr12	+	69924712	69955964	69924712	69955964	4	69924712,69925793,69931695,69955959,	69924740,69925836,69931763,69955964,
FRS2	FRS2:NM_001042555:chr12:+:311:424	chr12	+	69924712	69956002	69924712	69956002	3	69924712,69925793,69955959,	69924740,69925836,69956002,
FRS2	FRS2:NM_006654:chr12:+:372:431	chr12	+	69931746	69956002	69931746	69956002	2	69931746,69955959,	69931763,69956002,
FRS2	FRS2:NM_001042555:chr12:+:436:495	chr12	+	69956013	69962803	69956013	69962803	2	69956013,69962784,	69956054,69962803,
RAB3IP	RAB3IP:NM_022456:chr12:+:134:139	chr12	+	70132764	70132770	70132764	70132770	1	70132764,	70132770,
C12orf57	C12orf57:NM_138425:chr12:+:21:38	chr12	+	7053223	7053241	7053223	7053241	1	7053223,	7053241,
CNOT2	CNOT2:NM_001199302:chr12:+:428:433	chr12	+	70671983	70671989	70671983	70671989	1	70671983,	70671989,
KCNMB4	KCNMB4:NM_014505:chr12:+:68:205	chr12	+	70760129	70760267	70760129	70760267	1	70760129,	70760267,
EMG1	EMG1:NM_006331:chr12:+:59:109	chr12	+	7080002	7080053	7080002	7080053	1	7080002,	7080053,
C1S	C1S:NM_001734:chr12:+:47:199	chr12	+	7168026	7168179	7168026	7168179	1	7168026,	7168179,
TMEM19	TMEM19:NM_018279:chr12:+:142:378	chr12	+	72080019	72080256	72080019	72080256	1	72080019,	72080256,
TMEM19	TMEM19:NM_018279:chr12:+:450:497	chr12	+	72080327	72080375	72080327	72080375	1	72080327,	72080375,
TMEM19	TMEM19:NM_018279:chr12:+:472:525	chr12	+	72080349	72080403	72080349	72080403	1	72080349,	72080403,
RAB21	RAB21:NM_014999:chr12:+:64:168	chr12	+	72148721	72148826	72148721	72148826	1	72148721,	72148826,
TBC1D15	TBC1D15:NM_001146214:chr12:+:9:134	chr12	+	72233495	72255214	72233495	72255214	2	72233495,72255184,	72233591,72255214,
ATXN7L3B	ATXN7L3B:NM_001136262:chr12:+:92:259	chr12	+	74931642	74931810	74931642	74931810	1	74931642,	74931810,
FOXJ2	FOXJ2:NM_018416:chr12:+:512:661	chr12	+	8185870	8186020	8185870	8186020	1	8185870,	8186020,
FOXJ2	FOXJ2:NM_018416:chr12:+:781:969	chr12	+	8186139	8186328	8186139	8186328	1	8186139,	8186328,
FOXJ2	FOXJ2:NM_018416:chr12:+:972:995	chr12	+	8186330	8186354	8186330	8186354	1	8186330,	8186354,
WNK1	WNK1:NM_001184985:chr12:+:21:35	chr12	+	862109	862124	862109	862124	1	862109,	862124,
WNK1	WNK1:NM_001184985:chr12:+:300:377	chr12	+	862388	862466	862388	862466	1	862388,	862466,
WNK1	WNK1:NM_001184985:chr12:+:353:508	chr12	+	862441	862597	862441	862597	1	862441,	862597,
TMTC3	TMTC3:NM_181783:chr12:+:87:95	chr12	+	88536159	88536168	88536159	88536168	1	88536159,	88536168,
TMTC3	TMTC3:NM_181783:chr12:+:108:164	chr12	+	88536180	88536237	88536180	88536237	1	88536180,	88536237,
NUDT4	NUDT4:NM_019094:chr12:+:129:191	chr12	+	93771829	93771892	93771829	93771892	1	93771829,	93771892,
NUDT4	NUDT4:NM_019094:chr12:+:188:247	chr12	+	93771888	93771948	93771888	93771948	1	93771888,	93771948,
MRPL42	MRPL42:NM_014050:chr12:+:35:52	chr12	+	93861300	93861318	93861300	93861318	1	93861300,	93861318,
MRPL42	MRPL42:NM_014050:chr12:+:79:99	chr12	+	93862981	93863002	93862981	93863002	1	93862981,	93863002,
SOCS2	SOCS2:NM_001270467:chr12:+:183:281	chr12	+	93964357	93966475	93964357	93966475	2	93964357,93966460,	93964441,93966475,
SOCS2	SOCS2:NM_001270468:chr12:+:120:371	chr12	+	93964876	93966596	93964876	93966596	2	93964876,93966460,	93964992,93966596,
SOCS2	SOCS2:NM_001270470:chr12:+:180:641	chr12	+	93965636	93966596	93965636	93966596	2	93965636,93966460,	93965962,93966596,
SOCS2	SOCS2:NM_001270469:chr12:+:196:369	chr12	+	93965652	93966596	93965652	93966596	2	93965652,93966460,	93965690,93966596,
SOCS2	SOCS2:NM_001270467:chr12:+:274:402	chr12	+	93966467	93966596	93966467	93966596	1	93966467,	93966596,
CRADD	CRADD:NM_003805:chr12:+:13:39	chr12	+	94071163	94071190	94071163	94071190	1	94071163,	94071190,
SNRPF	SNRPF:NM_003095:chr12:+:21:44	chr12	+	96252729	96252753	96252729	96252753	1	96252729,	96252753,
SNRPF	SNRPF:NM_003095:chr12:+:61:78	chr12	+	96252769	96252787	96252769	96252787	1	96252769,	96252787,
[truncated: 5,021 more rows]

## Sheet: overlapping.uORF
AGL	AGL:NM_000643:chr1:+:128:211	chr1	+	100316172	100316612	100316172	100316612	2	100316172,100316530,	100316174,100316612,
[truncated: 1,208 more rows]

[truncated: 2 more sheets: dORF, internal]
