# Supplementary material for: Many lncRNAs, 5’UTRs, and pseudogenes are translated and some are likely to express functional proteins
Source: eLife journal article supplement (doi:10.7554/elife.08890), 2015-12-19
Supplement: supp [file elife-08890-supp-v1.zip › elife_poa_e08890_Supplementary_File_2.xlsx]

## Sheet: lncRNA
Human ORF ID	Mouse ORF ID	Mouse ORF type	Ka	Ks	Ka/Ks
C15orf37:NR_028330:chr15:+:591:833	ENSMUSG00000052154.3:ENSMUST00000063874.3:chr5:-:228:644	lncRNA	0.351238	0.229232	1.53224
CASC2:NR_026939:chr10:+:220:429	ENSMUSG00000091378.1:ENSMUST00000168140.1:chr19:+:50:220	lncRNA	0.753274	1.45559	0.517504
DLEU2:NR_002612:chr13:-:324:383	Dleu2:NR_028264:chr14:-:313:408	lncRNA	0.307109	0.396484	0.77458
ENSG00000130600.11:ENST00000428066.1:chr11:-:232:627	ENSMUSG00000000031.10:ENSMUST00000136359.2:chr7:-:1456:1899	lncRNA	0.497261	1.22245	0.406773
ENSG00000175701.6:ENST00000414416.2:chr2:-:1433:1816	1500011K16Rik:NR_015476:chr2:-:21:191	lncRNA	0.0248934	0.562705	0.0442387
ENSG00000179859.7:ENST00000324348.7:chr17:-:37:330	ENSMUSG00000043419.10:ENSMUST00000129321.1:chr11:+:81:653	lncRNA	0.170326	0.65874	0.258563
ENSG00000186594.8:ENST00000334146.3:chr17:-:253:366	ENSMUSG00000085148.1:ENSMUST00000149940.1:chr11:+:306:446	lncRNA	0.482137	0.606603	0.794816
ENSG00000186594.8:ENST00000570416.1:chr17:-:157:393	ENSMUSG00000085148.1:ENSMUST00000149940.1:chr11:+:644:826	lncRNA	0.551967	0.547402	1.00834
ENSG00000186594.8:ENST00000571595.1:chr17:-:119:244	ENSMUSG00000085148.1:ENSMUST00000149940.1:chr11:+:48:287	lncRNA	0.758051	0.495761	1.52907
ENSG00000186594.8:ENST00000571595.1:chr17:-:279:647	ENSMUSG00000085148.1:ENSMUST00000149940.1:chr11:+:284:547	lncRNA	0.349456	0.495833	0.704787
ENSG00000186594.8:ENST00000571595.1:chr17:-:301:432	ENSMUSG00000085148.1:ENSMUST00000149940.1:chr11:+:306:446	lncRNA	0.171291	0.223456	0.76655
ENSG00000186594.8:ENST00000571595.1:chr17:-:392:523	ENSMUSG00000085148.1:ENSMUST00000149940.1:chr11:+:364:594	lncRNA	0.680787	0.757544	0.898676
ENSG00000186594.8:ENST00000573075.1:chr17:-:25:243	ENSMUSG00000085148.1:ENSMUST00000149940.1:chr11:+:44:259	lncRNA	0.732929	0.722247	1.01479
ENSG00000186594.8:ENST00000573127.1:chr17:-:263:544	ENSMUSG00000085148.1:ENSMUST00000149940.1:chr11:+:284:547	lncRNA	0.576311	0.717947	0.802721
ENSG00000206573.4:ENST00000467069.2:chr3:-:90:341	ENSMUSG00000086429.4:ENSMUST00000159544.2:chr6:-:126:299	lncRNA	0.758542	0.861634	0.880353
ENSG00000206573.4:ENST00000520447.1:chr3:-:142:381	ENSMUSG00000086429.4:ENSMUST00000159544.2:chr6:-:126:299	lncRNA	0.697814	1.07435	0.649525
ENSG00000213904.4:ENST00000593491.2:chr19:+:121:264	4732471J01Rik:NR_073028:chr7:+:394:831	lncRNA	0.334715	0.450751	0.742573
ENSG00000222041.6:ENST00000331944.6:chr2:+:265:423	ENSMUSG00000074813.7:ENSMUST00000125354.1:chr2:-:129:260	lncRNA	0.37384	0.876318	0.426603
ENSG00000222041.6:ENST00000331944.6:chr2:+:89:217	ENSMUSG00000074813.7:ENSMUST00000151427.1:chr2:-:132:509	lncRNA	0.358725	0.330306	1.08604
ENSG00000222041.6:ENST00000409054.1:chr2:+:150:278	ENSMUSG00000074813.7:ENSMUST00000151427.1:chr2:-:132:509	lncRNA	0.358725	0.330306	1.08604
ENSG00000224043.3:ENST00000428857.1:chr2:-:68:379	ENSMUSG00000102014.1:ENSMUST00000185310.1:chr1:-:39:398	lncRNA	0.900459	1.65745	0.543279
ENSG00000225973.3:ENST00000436697.2:chr15:-:257:421	2310009A05Rik:NR_040377:chr9:+:219:392	lncRNA	0.19031	0.343462	0.554095
ENSG00000227946.1:ENST00000420509.1:chr2:+:29:298	ENSMUSG00000084799.2:ENSMUST00000186436.1:chr1:+:106:288	lncRNA	0.440084	0.581728	0.756512
ENSG00000227946.1:ENST00000420509.1:chr2:+:647:730	ENSMUSG00000084799.2:ENSMUST00000188602.1:chr1:+:176:268	lncRNA	0.291288	1.08171	0.269284
ENSG00000228393.3:ENST00000445184.1:chr7:-:22:324	ENSMUSG00000073147.3:ENSMUST00000185943.1:chr5:-:14:211	lncRNA	0.562929	0.600414	0.937568
ENSG00000228630.1:ENST00000424518.1:chr12:-:470:637	ENSMUSG00000086903.4:ENSMUST00000151949.4:chr15:-:209:253	lncRNA	0.371436	1.09033	0.340663
ENSG00000228630.1:ENST00000425595.1:chr12:-:168:263	ENSMUSG00000086903.4:ENSMUST00000151949.4:chr15:-:209:253	lncRNA	0.111912	0.559576	0.199994
ENSG00000229950.1:ENST00000420777.1:chr6:+:211:459	ENSMUSG00000097752.2:ENSMUST00000181176.2:chr13:+:365:457	lncRNA	0.0987489	0.0408507	2.41731
ENSG00000229950.1:ENST00000443546.1:chr6:+:115:492	ENSMUSG00000097752.2:ENSMUST00000181176.2:chr13:+:365:457	lncRNA	0.329582	0.213972	1.5403
ENSG00000231607.4:ENST00000235290.3:chr13:-:14:52	ENSMUSG00000097589.4:ENSMUST00000180917.3:chr14:-:49:87	lncRNA	0.078783	0.116643	0.675423
ENSG00000231607.4:ENST00000443587.1:chr13:-:258:353	Dleu2:NR_028264:chr14:-:313:408	lncRNA	0.623048	0.547584	1.13781
ENSG00000233429.5:ENST00000425358.2:chr7:+:503:571	ENSMUSG00000087658.2:ENSMUST00000132559.1:chr6:+:526:648	lncRNA	0.421604	0.531567	0.793134
ENSG00000233429.5:ENST00000429611.3:chr7:+:120:410	ENSMUSG00000087658.2:ENSMUST00000132559.1:chr6:+:185:367	lncRNA	0.359516	0.44445	0.8089
ENSG00000233429.5:ENST00000434063.3:chr7:+:150:425	ENSMUSG00000087658.2:ENSMUST00000132559.1:chr6:+:526:648	lncRNA	0.267715	0.229698	1.16551
ENSG00000233429.5:ENST00000434063.3:chr7:+:280:309	ENSMUSG00000087658.2:ENSMUST00000159006.1:chr6:+:103:177	lncRNA	0.151145	0	NA
ENSG00000236144.2:ENST00000588286.1:chr19:-:3:338	ENSMUSG00000097320.3:ENSMUST00000180820.2:chr7:+:48:479	lncRNA	0.996725	4.21962	0.236212
ENSG00000236144.2:ENST00000590125.1:chr19:-:143:421	ENSMUSG00000097320.3:ENSMUST00000180820.2:chr7:+:504:833	lncRNA	0.756692	1.12201	0.674407
ENSG00000236333.3:ENST00000426250.3:chr12:-:1104:1568	ENSMUSG00000084865.1:ENSMUST00000139331.1:chr10:+:55:348	lncRNA	0.6116	0.913934	0.669195
ENSG00000240990.5:ENST00000520360.1:chr7:+:566:844	ENSMUSG00000086427.3:ENSMUST00000134512.2:chr6:+:1097:1465	lncRNA	0.686951	1.45167	0.473213
ENSG00000243926.1:ENST00000492937.1:chr3:-:101:298	4931440P22Rik:NR_027955:chr3:-:1268:1312	lncRNA	0.320293	0.501064	0.639226
ENSG00000245532.4:ENST00000499732.1:chr11:+:114:329	ENSMUSG00000092274.2:ENSMUST00000173672.1:chr19:-:71:310	lncRNA	0.674336	1.49544	0.450927
ENSG00000245694.4:ENST00000558952.1:chr16:-:194:334	4933436C20Rik:NR_110452:chr8:-:467:526	lncRNA	0.406365	2.62016	0.155092
ENSG00000247595.2:ENST00000501599.2:chr11:+:305:388	ENSMUSG00000056509.5:ENSMUST00000185832.1:chr7:+:155:277	lncRNA	0.0664927	0.261168	0.254598
ENSG00000248008.2:ENST00000500741.2:chr12:-:4:159	ENSMUSG00000086368.1:ENSMUST00000149609.1:chr5:+:10:243	lncRNA	0.625615	0.85392	0.732639
ENSG00000249859.3:ENST00000504719.2:chr8:+:32:286	ENSMUSG00000097039.3:ENSMUST00000182075.2:chr15:+:52:195	lncRNA	0.68698	1.98205	0.3466
ENSG00000249859.3:ENST00000521951.1:chr8:+:8:457	ENSMUSG00000097039.3:ENSMUST00000180432.3:chr15:+:188:394	lncRNA	0.751639	0.819256	0.917465
ENSG00000250786.1:ENST00000509788.1:chr5:+:352:423	0610007N19Rik:NR_038186:chr15:-:393:488	lncRNA	0.350349	0.841334	0.416421
ENSG00000253352.4:ENST00000519077.3:chr22:+:271:582	ENSMUSG00000056579.12:ENSMUST00000132077.2:chr11:-:636:764	lncRNA	0.716924	0.739215	0.969844
ENSG00000253352.4:ENST00000563812.1:chr22:+:17:145	ENSMUSG00000056579.12:ENSMUST00000132077.2:chr11:-:636:764	lncRNA	0.23144	0.636714	0.363492
ENSG00000253352.4:ENST00000566220.1:chr22:+:729:845	ENSMUSG00000056579.12:ENSMUST00000132077.2:chr11:-:1012:1242	lncRNA	0.322211	0.428458	0.752025
ENSG00000255717.2:ENST00000545688.1:chr11:-:319:450	ENSMUSG00000097188.1:ENSMUST00000180819.1:chr19:+:1874:2065	lncRNA	0.303669	0.379593	0.799986
ENSG00000256628.2:ENST00000536865.1:chr3:+:215:481	2310061J03Rik:NR_027965:chr16:-:319:552	lncRNA	0.125293	0.0152282	8.22774
ENSG00000257084.1:ENST00000537269.1:chr12:+:204:302	ENSMUSG00000099609.1:ENSMUST00000189387.1:chr6:-:159:263	lncRNA	0.347403	0.29064	1.19531
ENSG00000257815.1:ENST00000550216.1:chr12:-:174:278	ENSMUSG00000052291.7:ENSMUST00000064101.7:chr10:+:203:868	lncRNA	0.436537	0.700307	0.62335
ENSG00000257815.1:ENST00000553135.1:chr12:-:26:205	ENSMUSG00000052291.7:ENSMUST00000064101.7:chr10:+:203:868	lncRNA	0.416383	1.3934	0.298826
ENSG00000270170.1:ENST00000602845.1:chr3:+:94:393	ENSMUSG00000096232.1:ENSMUST00000179515.1:chr16:-:100:279	lncRNA	0.246953	0.822266	0.300332
ENSG00000273270.1:ENST00000608477.1:chr7:-:289:705	1700052K11Rik:NR_027956:chr11:-:367:699	lncRNA	0.736256	1.14464	0.643221
LOC100216545:NR_024586:chr7:-:548:778	5031425E22Rik:NR_040469:chr5:-:485:637	lncRNA	0.778726	0.884269	0.880643
LOC401397:NR_015442:chr7:-:178:357	2610001J05Rik:NR_024619:chr6:-:165:344	lncRNA	0.0628699	0.740411	0.0849122
LOC729852:NR_034084:chr7:+:174:587	Gm16039:NR_033518:chr6:+:233:634	lncRNA	0.12089	0.532046	0.227218
PPP4R1L:NR_003505:chr20:-:14:337	ENSMUSG00000055897.8:ENSMUST00000132669.2:chr2:-:97:459	lncRNA	0.595968	1.62984	0.365661
PPP4R1L:NR_003505:chr20:-:300:1118	ENSMUSG00000055897.8:ENSMUST00000141051.2:chr2:-:1138:1392	lncRNA	0.466183	0.834904	0.558367
TRAF3IP2-AS1:NR_034108:chr6:+:31:177	E130307A14Rik:NR_038037:chr10:-:164:289	lncRNA	0.518995	0.258816	2.00527
XLOC_000523:TCONS_00002216:chr1:+:100:246	ENSMUSG00000090399.1:ENSMUST00000112103.1:chr1:-:129:194	lncRNA	0.318134	0.157624	2.01831
XLOC_l2_004631:TCONS_l2_00008581:chr15:+:220:681	5430417L22Rik:NR_030716:chr2:+:353:811	lncRNA	0.0375215	0.184954	0.20287
XLOC_l2_004631:TCONS_l2_00008581:chr15:+:24:89	5430417L22Rik:NR_030716:chr2:+:25:222	lncRNA	0.0244535	0.11718	0.208683
Human lncRNA ORFs conserved mouse protein coding genes, and these lncRNAs are possible missanotated pseudogenes
CCDC163P:NR_033296:chr1:-:470:907	Ccdc163:NM_026714:chr4:+:87:1067	canonical	0.5408	1.25692	0.430258
CCDC163P:NR_033297:chr1:-:470:670	Ccdc163:NM_026714:chr4:+:87:1067	canonical	0.498854	1.18813	0.419865
CCDC163P:NR_033298:chr1:-:470:826	Ccdc163:NM_026714:chr4:+:87:1067	canonical	0.459259	1.34514	0.341421
ENSG00000215908.5:ENST00000362058.2:chr1:-:132:497	Crocc:NM_172122:chr4:-:82:6111	canonical	0.418493	1.05142	0.398026
ENSG00000224597.5:ENST00000414457.1:chr10:+:60:203	Rab18:NM_001278447:chr18:+:98:736	canonical	0.415107	0.650529	0.638106
ENSG00000224597.5:ENST00000423223.1:chr10:+:54:200	Rab18:NM_001278447:chr18:+:98:736	canonical	0.245681	0.450594	0.545239
ENSG00000224597.5:ENST00000427063.2:chr10:+:46:162	Rab18:NM_001278447:chr18:+:98:736	canonical	0.301334	0.341185	0.883198
ENSG00000224597.5:ENST00000438202.1:chr10:+:68:322	Rab18:NM_001278447:chr18:+:98:736	canonical	0.747921	1.10124	0.67916
ENSG00000224597.5:ENST00000455774.1:chr10:+:202:411	Rab18:NM_001278447:chr18:+:98:736	canonical	0.536807	1.10563	0.485522
ENSG00000224597.5:ENST00000537908.1:chr10:+:83:202	Rab18:NM_001278447:chr18:+:98:736	canonical	0.137751	0.149069	0.924076
ENSG00000226287.3:ENST00000442222.1:chr22:+:353:454	Tmem191c:NM_177473:chr16:+:14:922	canonical	0.31848	0.631042	0.50469
ENSG00000232388.2:ENST00000411646.1:chr20:+:59:346	Gm561:NM_001033297:chr2:+:26:349	canonical	0.496961	0.855598	0.580835
ENSG00000232388.2:ENST00000608034.1:chr20:+:32:253	Gm561:NM_001033297:chr2:+:26:349	canonical	0.918976	1.12337	0.818052
ENSG00000232527.3:ENST00000452399.1:chr1:+:118:252	Lsp1:NM_001136071:chr7:+:87:1079	canonical	0.50468	1.3518	0.373339
ENSG00000232527.3:ENST00000457390.1:chr1:+:55:288	Lsp1:NM_001136071:chr7:+:87:1079	canonical	0.334819	1.07102	0.312616
ENSG00000258704.1:ENST00000554945.1:chr14:-:14:67	2700097O09Rik:NM_028314:chr12:-:33:938	canonical	0.289764	1.15959	0.249884
ENSG00000258704.1:ENST00000555015.1:chr14:-:16:141	2700097O09Rik:NM_028314:chr12:-:33:938	canonical	0.536194	1.57493	0.340455
HIATL2:NR_002894:chr9:-:277:666	Hiatl1:NM_001083901:chr13:-:268:1791	canonical	0.114585	0.506474	0.226241
HLA-H:NR_001434:chr6_mann_hap4:+:493:1020	H2-Q4:NM_001143689:chr17:+:27:1091	canonical	0.372329	0.528904	0.703963
LOC100133315:NR_029192:chr11:-:377:916	Xndr-trpc2:NM_011644:chr7:+:98:3892	canonical	0.0869184	0.43456	0.200015
LOC100286793:NR_027469:chr1:-:7:222	Parp8:NM_001081009:chr13:-:46:2721	canonical	0.441586	0.677961	0.651345
LOC100505876:NR_037879:chr2:+:209:451	1110001A16Rik:NM_001177402:chr17:+:28:270	canonical	0.113264	0.895002	0.126551
LOC283788:NR_027436:chrUn_gl000219:-:165:614	Frg1:NM_013522:chr8:-:157:933	canonical	0.953105	2.54543	0.374437
LOC283788:NR_027436:chrUn_gl000219:-:809:1051	Frg1:NM_013522:chr8:-:157:933	canonical	0.119562	0.876483	0.136411
LOC440434:NR_036750:chr17:-:1037:1522	Npepps:NM_008942:chr11:-:118:2880	canonical	0.014547	0.2922	0.0497846
LOC645166:NR_027354:chr1:+:227:445	Lsp1:NM_001136071:chr7:+:87:1079	canonical	0.269129	1.31149	0.205209
XLOC_008735:TCONS_00018888:chr10:-:12:167	Bend7:NM_178663:chr2:+:401:1705	canonical	0.0664584	0.3406	0.195121
XLOC_008735:TCONS_00018890:chr10:-:12:203	Bend7:NM_178663:chr2:+:401:1705	canonical	0.181484	0.488966	0.371159
XLOC_012281:TCONS_00025460:chr17:+:102:419	Rgs9:NM_011268:chr11:-:187:2214	canonical	0.985784	1.50927	0.653154
XLOC_l2_000416:TCONS_l2_00000581:chr1:+:117:542	Lsp1:NM_001136071:chr7:+:87:1079	canonical	0.342646	1.3535	0.253157
XLOC_l2_000791:TCONS_l2_00001043:chr1:-:844:1203	Rnf123:NM_032543:chr9:-:201:4145	canonical	0.478784	1.01052	0.473798
XLOC_l2_000791:TCONS_l2_00001054:chr1:-:93:317	Rnf123:NM_032543:chr9:-:201:4145	canonical	0.251596	0.829032	0.303482
XLOC_l2_006648:TCONS_l2_00012390:chr19:+:239:622	D3Ertd254e:NM_001101478:chr3:+:113:2503	canonical	0.595405	1.47743	0.402999
XLOC_l2_007111:TCONS_l2_00013205:chr19:-:147:2141	Zfp160:NM_145483:chr17:+:128:2080	canonical	0.393732	1.01189	0.389106
XLOC_l2_007433:TCONS_l2_00013801:chr2:+:80:1534	Zfp184:NM_183014:chr13:+:343:2556	canonical	0.341484	1.82059	0.187568
XLOC_l2_015980:TCONS_l2_00031076:chr6_cox_hap2:+:1857:2195	H2-M5:NM_001115075:chr17:-:0:1046	canonical	0.288923	0.556486	0.519193
ENSG00000232388.2:ENST00000411646.1:chr20:+:351:428	Gm561:NM_001033297:chr2:+:324:425	dORF	0.221333	0.28593	0.77408
CECR7:NR_015352:chr22:+:728:949	Acsm1:NM_054094:chr7:+:1364:1516	internal	0.301139	0.462261	0.651447
ENSG00000100181.17:ENST00000426585.1:chr22:+:21:335	Kmt2c:NM_001081383:chr5:-:360:608	internal	0.721396	1.35641	0.531843
ENSG00000204272.6:ENST00000374922.4:chrX:+:349:444	2210013O21Rik:NM_027327:chrX:+:402:512	uORF	0.21099	0.266197	0.792608
ENSG00000204272.6:ENST00000374922.4:chrX:+:95:301	2210013O21Rik:NM_027327:chrX:+:146:352	uORF	0.0345748	0.419441	0.0824306
ENSG00000223482.3:ENST00000413961.1:chr10:-:18:128	Ammecr1l:NM_153515:chr18:+:297:446	uORF	0.367026	0.411455	0.892021
XLOC_007241:TCONS_00015535:chr8:-:51:197	Slc45a4:NM_001033219:chr15:-:435:581	uORF	0.177054	0.281049	0.629974
XLOC_012097:TCONS_00025824:chr17:+:1192:1227	Nlgn2:NM_198862:chr11:-:231:266	uORF	0.124825	1.10788	0.112671
XLOC_l2_015536:TCONS_l2_00030698:chrX:+:364:441	2210013O21Rik:NM_027327:chrX:+:402:512	uORF	0.557586	0.487348	1.14412

## Sheet: psuedogene
Human ORF ID	Mouse ORF ID	Mouse ORF type	Ka	Ks	Ka/Ks
ENSG00000099725.10:ENST00000362758.5:chrY:+:18:851	Prkx:NM_016979:chrX:-:256:1323	canonical	0.18959	1.15151	0.164645
ENSG00000100058.8:ENST00000354451.2:chr22:+:120:281	Crybb2:NM_007773:chr5:-:21:638	canonical	0.0445105	0.997029	0.0446431
ENSG00000101898.5:ENST00000394552.2:chr20:+:0:545	Mcts2:NM_025543:chr2:+:123:668	canonical	0.0288612	0.915335	0.0315307
ENSG00000106133.13:ENST00000485741.2:chr7:-:790:1560	Nsun5:NM_145414:chr5:+:31:1428	canonical	0.233959	0.981689	0.238323
ENSG00000106610.10:ENST00000416602.2:chr7:+:130:345	Stag3:NM_016964:chr5:+:156:3878	canonical	0.487026	4.21409	0.115571
ENSG00000106610.10:ENST00000416602.2:chr7:+:308:727	Stag3:NM_016964:chr5:+:156:3878	canonical	0.157561	0.635526	0.247922
ENSG00000111788.9:ENST00000539757.1:chr12:+:265:2160	Ddx11:NM_001003919:chr17:+:177:2819	canonical	0.120008	0.690848	0.17371
ENSG00000123965.12:ENST00000337023.5:chr7:+:49:336	Pms2:NM_008886:chr5:+:56:2635	canonical	0.409898	1.15674	0.354355
ENSG00000123965.12:ENST00000380410.5:chr7:+:232:510	Pms2:NM_008886:chr5:+:56:2635	canonical	0.170005	0.556703	0.305378
ENSG00000123965.12:ENST00000394959.3:chr7:+:49:561	Pms2:NM_008886:chr5:+:56:2635	canonical	0.40372	1.16599	0.346248
ENSG00000124549.10:ENST00000465856.1:chr6:+:264:875	Btn2a2:NM_001289615:chr13:-:208:1752	canonical	0.363169	0.935532	0.388195
ENSG00000131002.7:ENST00000251749.6:chrY:+:149:691	Txlng:NM_178935:chrX:-:59:1633	canonical	0.488328	0.953766	0.512
ENSG00000131002.7:ENST00000407724.3:chrY:+:185:580	Txlng:NM_178935:chrX:-:59:1633	canonical	0.353893	0.705501	0.501619
ENSG00000143429.5:ENST00000271699.3:chr2:-:95:307	Lsp1:NM_001136071:chr7:+:87:1079	canonical	0.262967	1.05848	0.248437
ENSG00000143429.5:ENST00000608501.1:chr2:-:75:299	Lsp1:NM_001136071:chr7:+:87:1079	canonical	0.706761	1.36193	0.518941
ENSG00000143429.5:ENST00000609777.1:chr2:-:118:219	Lsp1:NM_001136071:chr7:+:87:1079	canonical	0.308157	1.19471	0.257935
ENSG00000152117.13:ENST00000415574.2:chr2:+:373:1083	Smpd4:NM_029945:chr16:+:126:2597	canonical	0.133977	0.893776	0.1499
ENSG00000152117.13:ENST00000543513.1:chr2:+:35:694	Smpd4:NM_029945:chr16:+:126:2597	canonical	0.118364	0.769429	0.153834
ENSG00000160172.6:ENST00000529253.1:chr11:-:21:416	Fam86:NM_027446:chr16:-:20:1027	canonical	0.563563	1.45407	0.387575
ENSG00000160766.10:ENST00000313929.7:chr1:-:262:1131	Gba:NM_001077411:chr3:+:174:1721	canonical	0.0990956	0.646291	0.15333
ENSG00000160766.10:ENST00000368374.1:chr1:-:250:1329	Gba:NM_001077411:chr3:+:174:1721	canonical	0.224961	0.638311	0.352432
ENSG00000160766.10:ENST00000473223.1:chr1:-:968:1960	Gba:NM_001077411:chr3:+:174:1721	canonical	0.37776	0.908469	0.415821
ENSG00000168405.10:ENST00000436589.2:chr6:-:126:188	Cmah:NM_001111110:chr13:+:473:2206	canonical	0.147572	0.391372	0.377063
ENSG00000168405.10:ENST00000462823.1:chr6:-:248:466	Cmah:NM_001111110:chr13:+:473:2206	canonical	0.197197	0.679398	0.290253
ENSG00000171084.11:ENST00000467239.1:chr3:+:249:494	Fam86:NM_027446:chr16:-:20:1027	canonical	0.386667	0.716095	0.539966
ENSG00000174353.13:ENST00000308103.6:chr7:-:480:1001	Stag3:NM_016964:chr5:+:156:3878	canonical	0.188898	0.699577	0.270018
ENSG00000174353.13:ENST00000423834.2:chr7:-:602:910	Stag3:NM_016964:chr5:+:156:3878	canonical	0.154821	0.732751	0.211287
ENSG00000174353.13:ENST00000426587.1:chr7:-:422:877	Stag3:NM_016964:chr5:+:156:3878	canonical	0.221922	0.585751	0.378868
ENSG00000174353.13:ENST00000428423.1:chr7:-:423:665	Stag3:NM_016964:chr5:+:156:3878	canonical	0.205334	0.529338	0.387907
ENSG00000174353.13:ENST00000436857.1:chr7:-:284:574	Stag3:NM_016964:chr5:+:156:3878	canonical	0.217143	0.905663	0.239761
ENSG00000174353.13:ENST00000448173.1:chr7:-:478:732	Stag3:NM_016964:chr5:+:156:3878	canonical	0.130092	0.695246	0.187117
ENSG00000174353.13:ENST00000569650.1:chr7:-:348:791	Stag3:NM_016964:chr5:+:156:3878	canonical	0.287822	0.902307	0.318984
ENSG00000176700.15:ENST00000348993.5:chr15:+:449:907	Zfp202:NM_030713:chr9:+:216:2141	canonical	0.332301	1.48433	0.223873
ENSG00000176700.15:ENST00000530891.3:chr15:+:73:504	Zfp202:NM_030713:chr9:+:216:2141	canonical	0.294994	1.6447	0.17936
ENSG00000180747.11:ENST00000522841.2:chr16:-:79:651	Slc7a5:NM_011404:chr8:-:80:1618	canonical	0.100904	0.361852	0.278853
ENSG00000181819.14:ENST00000512203.1:chrX:+:0:545	Kctd9:NM_001111028:chr14:+:239:1408	canonical	0.0331468	0.430704	0.0769596
ENSG00000182841.8:ENST00000357802.2:chr22:-:37:384	Rrp7a:NM_029101:chr15:-:67:909	canonical	0.301863	0.908689	0.332196
ENSG00000182841.8:ENST00000357802.2:chr22:-:558:869	Rrp7a:NM_029101:chr15:-:67:909	canonical	0.0368601	0.554868	0.0664304
ENSG00000182841.8:ENST00000421116.1:chr22:-:119:466	Rrp7a:NM_029101:chr15:-:67:909	canonical	0.523574	1.14787	0.456127
ENSG00000183604.10:ENST00000411546.3:chr16:-:2020:2196	Smg1:NM_001031814:chr7:-:347:11323	canonical	0.0675837	0.560915	0.120488
ENSG00000183666.12:ENST00000508973.1:chr5:+:47:253	Wdr70:NM_001081402:chr15:-:66:2039	canonical	0.110954	0.570478	0.194494
ENSG00000183935.3:ENST00000331998.1:chr12:+:963:1628	Htr7:NM_008315:chr19:-:107:1453	canonical	0.184572	0.501815	0.36781
ENSG00000184188.6:ENST00000507366.1:chr5:-:468:1100	Actb:NM_007393:chr5:-:79:1206	canonical	0.11154	0.457944	0.243567
ENSG00000185020.5:ENST00000451450.1:chr9:+:12:161	Cntnap3:NM_001081129:chr13:-:48:3911	canonical	0.0818672	0.141814	0.577287
ENSG00000186162.6:ENST00000335507.5:chr3:-:170:316	Emc3:NM_175101:chr6:-:156:941	canonical	0.40878	1.23251	0.331665
ENSG00000186312.6:ENST00000380331.1:chrX:+:289:462	Car5b:NM_181315:chrX:-:126:1079	canonical	0.362403	0.659278	0.549697
ENSG00000186312.6:ENST00000380333.1:chrX:+:214:768	Car5b:NM_181315:chrX:-:126:1079	canonical	0.791447	1.16871	0.677196
ENSG00000186312.6:ENST00000380336.1:chrX:+:705:839	Car5b:NM_181315:chrX:-:126:1079	canonical	0.539475	0.96526	0.558891
ENSG00000186704.8:ENST00000162863.6:chr7:+:124:651	Dtx2:NM_001256096:chr5:+:405:2264	canonical	0.18333	0.708979	0.258583
ENSG00000187953.6:ENST00000403974.2:chr7:+:126:680	Pms2:NM_008886:chr5:+:56:2635	canonical	0.434137	1.17107	0.370718
ENSG00000189212.8:ENST00000454445.1:chr7:-:0:1172	Dpy19l2:NM_001166207:chr9:-:130:2451	canonical	0.191094	0.587281	0.325387
ENSG00000196204.7:ENST00000360944.4:chr7:+:149:277	Rnf216:NM_207110:chr5:-:182:2914	canonical	0.387416	0.636864	0.608319
ENSG00000196204.7:ENST00000403969.1:chr7:+:385:630	Rnf216:NM_207110:chr5:-:182:2914	canonical	0.377765	1.00049	0.377582
ENSG00000196204.7:ENST00000404006.1:chr7:+:446:622	Rnf216:NM_207110:chr5:-:182:2914	canonical	0.0144447	0.733057	0.0197048
ENSG00000196204.7:ENST00000404404.1:chr7:+:447:722	Rnf216:NM_207110:chr5:-:182:2914	canonical	0.374396	1.38008	0.271287
ENSG00000196204.7:ENST00000405396.2:chr7:+:161:352	Rnf216:NM_207110:chr5:-:182:2914	canonical	0.369877	1.95839	0.188868
ENSG00000196204.7:ENST00000493407.1:chr7:+:495:641	Rnf216:NM_207110:chr5:-:182:2914	canonical	0.320757	1.51108	0.21227
ENSG00000196922.6:ENST00000426361.2:chr8:-:214:1659	Zfp62:NM_009562:chr11:+:173:2917	canonical	0.492782	1.56494	0.31489
ENSG00000203819.6:ENST00000498492.2:chr1:-:331:378	Hist1h2bf:NM_178195:chr13:-:0:380	canonical	0.0304718	0.197632	0.154185
ENSG00000204959.3:ENST00000378112.1:chr7:-:838:4521	Arhgef5:NM_133674:chr6:+:112:4857	canonical	0.20762	0.632228	0.328394
ENSG00000205361.4:ENST00000463480.2:chr16:+:20:169	Mt1:NM_013602:chr8:+:222:407	canonical	0.12624	0.39718	0.317841
ENSG00000205763.9:ENST00000381639.3:chr7:-:155:364	Rp9:NM_018739:chr9:-:155:796	canonical	0.396991	0.497539	0.797911
ENSG00000205903.2:ENST00000382252.1:chr7:+:0:3014	Zfp316:NM_017467:chr5:-:325:3378	canonical	0.109237	0.613043	0.178188
ENSG00000213857.3:ENST00000423293.1:chr22:-:486:800	Actb:NM_007393:chr5:-:79:1206	canonical	0.827105	1.5215	0.54361
ENSG00000214135.4:ENST00000414207.1:chr3:-:696:1040	Sdha:NM_023281:chr13:-:32:2026	canonical	0.0617924	0.633185	0.0975898
ENSG00000214135.4:ENST00000418868.1:chr3:-:115:234	Sdha:NM_023281:chr13:-:32:2026	canonical	0.662214	1.29437	0.511612
ENSG00000214135.4:ENST00000440535.1:chr3:-:329:535	Sdha:NM_023281:chr13:-:32:2026	canonical	0.0792255	0.822693	0.0963002
ENSG00000214174.4:ENST00000430983.1:chr17:-:1014:1373	Amz2:NM_001252193:chr11:+:472:1563	canonical	0.534433	1.10504	0.483632
ENSG00000214176.5:ENST00000440036.2:chr17:-:130:645	Plekhm1:NM_183034:chr11:-:113:3337	canonical	0.178587	0.752034	0.237471
ENSG00000214176.5:ENST00000578036.1:chr17:-:272:907	Plekhm1:NM_183034:chr11:-:113:3337	canonical	0.127436	0.731518	0.174207
ENSG00000214331.4:ENST00000429810.2:chr16:-:211:1086	Pdpr:NM_198308:chr8:+:135:2771	canonical	0.182529	0.520501	0.350679
ENSG00000214826.4:ENST00000290818.6:chr12:-:338:2971	Ddx11:NM_001003919:chr17:+:177:2819	canonical	0.12076	0.675621	0.178738
ENSG00000220804.4:ENST00000453598.2:chr2:+:116:634	Sept10:NM_001024910:chr10:-:439:1797	canonical	0.789931	2.57568	0.306688
ENSG00000223345.3:ENST00000412169.1:chr1:+:0:128	Hist2h2bb:NM_175666:chr3:+:52:432	canonical	0.0209566	0.594687	0.0352397
ENSG00000223756.2:ENST00000526284.1:chr11:+:59:523	Acsm1:NM_054094:chr7:+:82:1803	canonical	0.761825	3.05401	0.249451
ENSG00000223756.2:ENST00000526488.1:chr11:+:121:456	Acsm1:NM_054094:chr7:+:82:1803	canonical	0.873142	0	NA
ENSG00000223959.4:ENST00000429663.1:chr16:+:45:263	Afg3l1:NM_054070:chr8:+:48:2417	canonical	0.54592	0.813181	0.671339
ENSG00000224287.2:ENST00000438684.1:chr2:-:0:1343	Msl3:NM_010832:chrX:-:167:1567	canonical	0.166555	0.714324	0.233165
ENSG00000226145.3:ENST00000425692.2:chr17:-:39:623	Krt14:NM_016958:chr11:-:55:1509	canonical	0.0946003	0.53729	0.176069
ENSG00000226823.1:ENST00000379514.2:chr9:-:31:345	Sugt1:NM_026474:chr14:+:138:1148	canonical	0.246726	0.6658	0.370571
ENSG00000226823.1:ENST00000379514.2:chr9:-:3:104	Sugt1:NM_026474:chr14:+:138:1148	canonical	0.673724	0.967724	0.696194
ENSG00000227671.3:ENST00000421406.1:chr1:-:171:1337	Zfp11:NM_172462:chr5:-:115:2058	canonical	0.436561	0	NA
ENSG00000228695.5:ENST00000421606.1:chr16:+:997:1797	Ces1d:NM_053200:chr8:-:85:1782	canonical	0.172354	0.595613	0.289373
ENSG00000228782.3:ENST00000425159.3:chr17:-:33:347	Mrpl45:NM_025927:chr11:+:158:1078	canonical	0.171819	0.619648	0.277285
ENSG00000232559.2:ENST00000428370.1:chr7:-:1:291	Rabgef1:NM_001199059:chr5:+:83:1558	canonical	0.790546	0	NA
ENSG00000232559.2:ENST00000428370.1:chr7:-:337:423	Rabgef1:NM_001199059:chr5:+:83:1558	canonical	0.0472423	0.182979	0.258184
ENSG00000232559.2:ENST00000428370.1:chr7:-:57:335	Rabgef1:NM_001199059:chr5:+:83:1558	canonical	0.51784	0	NA
ENSG00000232559.2:ENST00000445080.2:chr7:-:169:579	Rabgef1:NM_001199059:chr5:+:83:1558	canonical	0.810998	5.47722	0.148067
ENSG00000235217.5:ENST00000400643.2:chr20:-:105:1172	Tspyl3:NM_198617:chr2:-:125:1129	canonical	0.201056	0.702867	0.286051
ENSG00000237238.2:ENST00000443754.1:chr9:-:226:891	Bms1:NM_194339:chr6:-:163:4017	canonical	0.0534194	0.569886	0.0937369
ENSG00000237238.2:ENST00000443754.1:chr9:-:39:104	Bms1:NM_194339:chr6:-:163:4017	canonical	0.200583	0.770061	0.260476
ENSG00000237854.3:ENST00000435469.2:chr17:+:170:361	Smurf2:NM_025481:chr11:-:483:2729	canonical	0.658443	1.32513	0.496889
ENSG00000240225.6:ENST00000467807.1:chr19:+:348:860	Zfp551:NM_001033820:chr7:-:3:2093	canonical	0.648651	2.91899	0.222218
ENSG00000240445.3:ENST00000395675.4:chr17:-:175:564	Foxo3:NM_019740:chr10:-:325:2343	canonical	0.0797391	0.385833	0.206668
ENSG00000241494.1:ENST00000472981.1:chr14:+:330:437	Rpl26:NM_009080:chr11:+:64:501	canonical	0.0120209	1.06022	0.0113382
ENSG00000243554.1:ENST00000453589.1:chr7:-:0:341	Ccz1:NM_177682:chr5:-:41:1483	canonical	0.337608	1.31826	0.2561
ENSG00000243554.1:ENST00000453589.1:chr7:-:200:355	Ccz1:NM_177682:chr5:-:41:1483	canonical	0	0.63352	0
ENSG00000244026.2:ENST00000459803.1:chr3:-:337:1029	Fam86:NM_027446:chr16:-:20:1027	canonical	0.208217	0.669605	0.310955
ENSG00000246596.2:ENST00000499314.2:chr5:-:10:234	Simc1:NM_176987:chr13:+:71:4135	canonical	0.254784	1.00571	0.253338
ENSG00000246596.2:ENST00000515045.1:chr5:-:60:254	Simc1:NM_176987:chr13:+:71:4135	canonical	0.0794688	0.438012	0.181431
ENSG00000250462.4:ENST00000417404.1:chr17:+:1047:1544	Gm884:NM_001033434:chr11:-:127:4530	canonical	0.508232	1.87881	0.270507
ENSG00000251474.2:ENST00000394491.3:chr3:-:403:651	Rpl32:NM_172086:chr6:-:51:458	canonical	0.638479	1.23582	0.516645
ENSG00000251474.2:ENST00000506593.1:chr3:-:177:344	Rpl32:NM_172086:chr6:-:51:458	canonical	0.0557101	0.469543	0.118647
ENSG00000256594.3:ENST00000545363.2:chr12:+:558:788	Clec2g:NM_027562:chr6:+:36:845	canonical	0.567369	3.38638	0.167544
ENSG00000256594.3:ENST00000575094.1:chr12:+:1103:1270	Clec2g:NM_027562:chr6:+:36:845	canonical	0.403301	1.43928	0.28021
ENSG00000257267.1:ENST00000399070.3:chr18:+:284:481	Zfp35:NM_011755:chr18:+:262:2004	canonical	0.329351	0.791629	0.416042
ENSG00000258590.1:ENST00000554452.1:chr15:-:336:593	Nbea:NM_030595:chr3:-:466:9276	canonical	0.125662	0.758738	0.16562
ENSG00000259479.2:ENST00000562107.1:chr15:-:139:447	Sord:NM_146126:chr2:+:54:1127	canonical	0.154486	0.714576	0.216192
ENSG00000259479.2:ENST00000564140.1:chr15:-:198:488	Sord:NM_146126:chr2:+:54:1127	canonical	0.119589	0.656159	0.182256
ENSG00000260549.1:ENST00000565768.1:chr16:+:201:272	Mt1:NM_013602:chr8:+:222:407	canonical	0.109465	0.503376	0.217462
ENSG00000260549.1:ENST00000565768.1:chr16:+:87:164	Mt1:NM_013602:chr8:+:222:407	canonical	0.192161	0.519426	0.369949
ENSG00000266865.2:ENST00000580190.1:chr17:+:33:422	Smurf2:NM_025481:chr11:-:483:2729	canonical	0.70563	1.38256	0.510381
ENSG00000269374.1:ENST00000600255.1:chr19:-:138:359	Zfand5:NM_009551:chr19:+:474:1115	canonical	0.03357	0.0712846	0.470929
ENSG00000272601.1:ENST00000478818.1:chr7:+:66:449	Efcab3:NM_001081046:chr11:+:302:1600	canonical	0.189777	1.44057	0.131738
ENSG00000272655.1:ENST00000326391.6:chr7:-:225:539	Polr2j:NM_011293:chr5:+:62:415	canonical	0.142411	0.593231	0.24006
ENSG00000273340.1:ENST00000510438.1:chr6:-:6:488	Mill2:NM_153761:chr7:+:26:1093	canonical	0.710492	1.83107	0.388021
ENSG00000245958.2:ENST00000508519.1:chr4:+:206:316	Nupr1l:NM_026916:chr5:+:179:439	external	0.442528	0.657545	0.673
ENSG00000078319.7:ENST00000431037.1:chr7:-:551:703	Pms2:NM_008886:chr5:+:111:161	internal	0.152978	0.190853	0.801551
ENSG00000100058.8:ENST00000354451.2:chr22:+:5:154	Crybb2:NM_007773:chr5:-:151:312	internal	0.247305	0.148328	1.66728
ENSG00000124549.10:ENST00000466808.2:chr6:+:334:561	Btn2a2:NM_001289614:chr13:-:442:684	internal	0.245751	0.319989	0.767999
ENSG00000152117.13:ENST00000538598.1:chr2:+:19:222	Smpd4:NM_001164609:chr16:+:272:421	internal	0.202272	0.290405	0.696518
ENSG00000186312.6:ENST00000380331.1:chrX:+:104:226	Car5b:NM_181315:chrX:-:224:310	internal	0.540539	0.927982	0.582489
ENSG00000205763.9:ENST00000381639.3:chr7:-:464:520	Rp9:NM_018739:chr9:-:442:543	internal	0.10271	0.0858473	1.19643
ENSG00000205763.9:ENST00000450133.1:chr7:-:171:422	Rp9:NM_018739:chr9:-:348:521	internal	0.193016	0.12264	1.57384
ENSG00000214135.4:ENST00000437008.1:chr3:-:475:549	Sdha:NM_023281:chr13:-:295:405	internal	0.430991	0.477667	0.902284
ENSG00000215154.2:ENST00000399702.1:chr16:+:122:484	Kctd5:NM_027008:chr17:-:71:313	internal	0.347468	0.353212	0.983737
ENSG00000223959.4:ENST00000437774.1:chr16:+:82:198	Afg3l1:NM_054070:chr8:+:116:280	internal	0.578514	1.64053	0.352638
ENSG00000237854.3:ENST00000435469.2:chr17:+:112:201	Smurf2:NM_025481:chr11:-:1736:1780	internal	0.0625578	0.125117	0.499993
ENSG00000255624.1:ENST00000368895.2:chr10:+:921:1157	2310057M21Rik:NM_026655:chr7:-:901:1188	internal	0.241114	0.159719	1.50961
ENSG00000257267.1:ENST00000399070.3:chr18:+:533:796	Zfp35:NM_011755:chr18:+:503:607	internal	0.320001	0.465692	0.687152
ENSG00000266865.2:ENST00000578883.1:chr17:+:1:117	Smurf2:NM_025481:chr11:-:767:853	internal	0.538561	1.33627	0.403034
ENSG00000266865.2:ENST00000579692.1:chr17:+:294:443	Smurf2:NM_025481:chr11:-:676:882	internal	0.276585	0.339992	0.813503
ENSG00000106610.10:ENST00000416602.2:chr7:+:47:148	Aimp2:NM_146165:chr5:-:56:193	overlap.uORF	0.700774	1.30995	0.534963
ENSG00000127957.12:ENST00000422064.1:chr7:-:41:169	Rbak:NM_021326:chr5:-:272:451	overlap.uORF	0.379015	0.459009	0.825724
ENSG00000127957.12:ENST00000437568.2:chr7:-:536:694	Rbak:NM_021326:chr5:-:272:451	overlap.uORF	0.537088	0.726255	0.739531
ENSG00000205903.2:ENST00000427912.1:chr7:+:510:635	Zfp316:NM_017467:chr5:-:282:401	overlap.uORF	0.33639	0.351886	0.955962
ENSG00000225648.1:ENST00000415772.1:chr7:+:17:202	Sbds:NM_023248:chr5:-:9:161	overlap.uORF	0.567466	0.456778	1.24232
ENSG00000242294.2:ENST00000414292.1:chr7:+:14:232	Aimp2:NM_001172146:chr5:-:78:290	overlap.uORF	0.41927	0.430286	0.9744
ENSG00000243406.2:ENST00000423686.1:chr13:-:44:235	Mrps31:NM_020560:chr8:+:8:256	overlap.uORF	0.428265	0.683983	0.626134
ENSG00000243406.2:ENST00000606974.1:chr13:-:46:180	Mrps31:NM_020560:chr8:+:40:243	overlap.uORF	0.418005	0.506633	0.825065
ENSG00000255642.1:ENST00000539977.1:chr12:+:0:218	Pabpc1:NM_008774:chr15:-:268:690	overlap.uORF	0.158985	0.120738	1.31678
ENSG00000259098.1:ENST00000553429.1:chr15:+:321:704	Zcchc14:NM_080855:chr8:-:9:113	overlap.uORF	0.114767	0.0382383	3.00136
ENSG00000132967.9:ENST00000255320.6:chr3:+:186:641	ENSMUSG00000082585.3:ENSMUST00000120421.1:chr15:-:0:647	pseudogene	0.0110814	0.62774	0.0176528
ENSG00000196205.7:ENST00000436459.2:chr9:+:621:1388	ENSMUSG00000082536.1:ENSMUST00000118928.1:chr2:+:119:928	pseudogene	0.037594	0.526844	0.0713569
ENSG00000197149.4:ENST00000443932.2:chr11:+:291:881	ENSMUSG00000091957.3:ENSMUST00000170335.3:chr18:-:11:892	pseudogene	0.0257107	0.674976	0.0380913
ENSG00000205100.2:ENST00000378770.1:chr4:+:205:1254	ENSMUSG00000083899.2:ENSMUST00000121455.2:chr11:+:343:1467	pseudogene	0.259147	1.09739	0.236148
ENSG00000213406.3:ENST00000505539.1:chr4:-:84:281	ENSMUSG00000080180.2:ENSMUST00000169128.1:chr11:+:149:232	pseudogene	0.179043	0.583481	0.306853
ENSG00000213846.3:ENST00000368528.3:chr3:+:205:744	ENSMUSG00000086869.3:ENSMUST00000169219.1:chr17:-:30:776	pseudogene	0.0431755	0.545962	0.0790815
ENSG00000213917.2:ENST00000396820.2:chr2:-:633:671	ENSMUSG00000086583.3:ENSMUST00000071523.4:chr7:-:0:893	pseudogene	0.0514314	0.0911836	0.564043
ENSG00000214975.4:ENST00000414949.2:chr6:+:15:119	ENSMUSG00000062933.7:ENSMUST00000075723.6:chr9:+:37:117	pseudogene	0.407246	0.259664	1.56836
ENSG00000218227.3:ENST00000477964.1:chr5:+:6:590	ENSMUSG00000081094.3:ENSMUST00000122422.1:chr8:+:30:620	pseudogene	0.0355463	0.472329	0.0752576
ENSG00000224864.3:ENST00000434475.2:chr19:+:192:482	ENSMUSG00000060419.8:ENSMUST00000140155.1:chr5:-:0:440	pseudogene	0.0190951	0.508301	0.0375666
ENSG00000224892.2:ENST00000427198.2:chr13:+:544:720	ENSMUSG00000081400.1:ENSMUST00000119790.1:chr2:-:54:617	pseudogene	0.0188723	0.429708	0.0439189
ENSG00000228224.3:ENST00000419462.1:chr8:+:597:956	ENSMUSG00000081975.1:ENSMUST00000120435.1:chr4:+:237:365	pseudogene	0.690609	0.875875	0.78848
ENSG00000231340.1:ENST00000428275.1:chrX:-:614:844	ENSMUSG00000059195.10:ENSMUST00000121430.1:chr4:+:0:1127	pseudogene	0.402841	0	NA
ENSG00000231767.2:ENST00000497083.2:chr1:+:393:470	ENSMUSG00000055093.10:ENSMUST00000119780.1:chr6:+:0:470	pseudogene	0.0162351	0.406951	0.0398944
ENSG00000233476.2:ENST00000434005.1:chr7:-:0:563	ENSMUSG00000082536.1:ENSMUST00000118928.1:chr2:+:119:928	pseudogene	0.0811671	0.45296	0.179193
ENSG00000234498.2:ENST00000424500.1:chr12:+:0:611	ENSMUSG00000083992.1:ENSMUST00000117851.1:chr11:-:245:598	pseudogene	0.068197	0.584201	0.116736
ENSG00000240738.1:ENST00000468681.1:chr8:-:104:343	ENSMUSG00000084106.4:ENSMUST00000120149.1:chr1:-:0:890	pseudogene	0.0635589	0.760474	0.083578
ENSG00000241411.1:ENST00000459634.1:chr4:-:465:572	ENSMUSG00000081684.4:ENSMUST00000117295.1:chrX:+:0:881	pseudogene	0.186363	1.01809	0.183052
ENSG00000241547.1:ENST00000486001.1:chr1:+:21:467	ENSMUSG00000059195.10:ENSMUST00000121430.1:chr4:+:0:1127	pseudogene	0.0577437	0.664111	0.0869488
ENSG00000243781.1:ENST00000450208.1:chr1:+:242:724	ENSMUSG00000059195.10:ENSMUST00000121430.1:chr4:+:0:1127	pseudogene	0.07457	0.776381	0.0960482
ENSG00000248415.1:ENST00000507324.1:chr15:-:735:788	ENSMUSG00000070443.5:ENSMUST00000094175.5:chr3:+:738:1001	pseudogene	0.270243	0.239813	1.12689
ENSG00000256663.1:ENST00000540175.1:chr12:+:324:1421	ENSMUSG00000083668.1:ENSMUST00000122244.1:chrX:-:45:1586	pseudogene	0.148298	1.23237	0.120335
ENSG00000257576.1:ENST00000547203.1:chr12:+:0:1346	ENSMUSG00000058809.8:ENSMUST00000119713.1:chr11:+:0:1721	pseudogene	0.0698667	0.462254	0.151144
ENSG00000257907.2:ENST00000547505.2:chr12:+:1113:1274	ENSMUSG00000082536.1:ENSMUST00000118928.1:chr2:+:1140:1364	pseudogene	0.0511603	0.327594	0.15617
ENSG00000260266.1:ENST00000562009.1:chr15:+:447:662	ENSMUSG00000062933.7:ENSMUST00000075723.6:chr9:+:304:396	pseudogene	0.708005	1.00745	0.702765
ENSG00000197582.5:ENST00000388829.3:chrX:-:0:140	Gpx1:NM_008160:chr9:+:233:373	read.through	0.110998	0.411093	0.270008
ENSG00000228409.1:ENST00000442266.1:chr7:+:16:210	Cct6a:NM_009838:chr5:+:83:1324	read.through	0.194683	0.801723	0.24283
ENSG00000228409.1:ENST00000443108.1:chr7:+:17:154	Cct6a:NM_009838:chr5:+:83:1324	read.through	0.165778	0.852538	0.194452
ENSG00000269388.1:ENST00000596210.1:chr19:+:449:808	Ctu1:NM_145582:chr7:+:458:1342	truncation	0.893255	1.34013	0.666541
ENSG00000198496.6:ENST00000356906.3:chr17:+:112:147	Nbr1:NM_001252220:chr11:+:160:186	uORF	0	0.266591	0
ENSG00000257267.1:ENST00000399070.3:chr18:+:158:265	Zfp35:NM_011755:chr18:+:190:243	uORF	0.238753	0.190714	1.25189

## Sheet: uORF
Human ORF ID	Mouse ORF ID	Mouse ORF type	Ka	Ks	Ka/Ks
ABHD13:NM_032859:chr13:+:149:244	Abhd13:NM_001081119:chr8:+:12:302	uORF	0.198892	0.185736	1.07083
ABLIM3:NM_014945:chr5:+:167:226	Ablim3:NM_001164491:chr18:-:117:239	uORF	0.0704723	0.421786	0.167081
ABLIM3:NM_014945:chr5:+:35:109	Ablim3:NM_001164491:chr18:-:46:120	uORF	0.269112	0.333361	0.807269
ACAP2:NM_012287:chr3:-:99:143	Acap2:NM_030138:chr16:-:91:135	uORF	0.180542	0.508049	0.355364
ACP6:NM_016361:chr1:-:69:152	Acp6:NM_019800:chr3:+:61:213	uORF	0.656092	0	NA
ACSL4:NM_022977:chrX:-:192:377	Acsl4:NM_207625:chrX:-:253:333	uORF	0.123253	0.390926	0.315285
ADAMTS1:NM_006988:chr21:-:35:286	Adamts1:NM_009621:chr16:-:31:321	uORF	0.637793	1.08536	0.58763
ADAMTS4:NM_005099:chr1:-:33:260	Adamts4:NM_172845:chr1:+:140:241	uORF	0.55605	0.662238	0.839653
ADCY7:NM_001114:chr16:+:107:175	Adcy7:NM_001037723:chr8:+:427:501	uORF	0.339738	0.86233	0.393978
ADIPOR2:NM_024551:chr12:+:83:178	Adipor2:NM_197985:chr6:-:11:133	uORF	0.449209	0.270983	1.6577
AFTPH:NM_001002243:chr2:+:120:143	Aftph:NM_001252503:chr11:-:55:78	uORF	0	0.191114	0
AGGF1:NM_018046:chr5:+:240:338	Aggf1:NM_025630:chr13:-:158:256	uORF	0.247477	0.469808	0.526761
AGPAT6:NM_178819:chr8:+:181:267	Agpat6:NM_018743:chr8:-:244:342	uORF	0.244394	0.742003	0.329371
AGPAT6:NM_178819:chr8:+:815:883	Agpat6:NM_018743:chr8:-:832:912	uORF	0.374905	0.529837	0.707585
AHDC1:NM_001029882:chr1:-:236:385	Ahdc1:NM_146155:chr4:+:78:251	uORF	0.476473	0.619032	0.769706
AHDC1:NM_001029882:chr1:-:84:251	Ahdc1:NM_146155:chr4:+:78:251	uORF	0.155527	0.0679073	2.29028
AHSA1:NM_012111:chr14:+:89:151	Ahsa1:NM_146036:chr12:+:43:105	uORF	0.22658	0.11284	2.00797
AIDA:NM_022831:chr1:-:118:153	Aida:NM_181732:chr1:+:371:406	uORF	0.0864264	0.127969	0.675369
AIP:NM_003977:chr11:+:19:51	Aip:NM_001276284:chr19:-:35:67	uORF	0.0977714	0.133415	0.732835
AKAP10:NM_007202:chr17:-:56:133	Akap10:NM_019921:chr11:-:60:137	uORF	0.154961	0.314166	0.493244
AKR1A1:NM_006066:chr1:+:138:383	Akr1a1:NM_021473:chr4:-:217:345	overlap.uORF	0.597569	0.67503	0.885247
AKT1:NM_001014431:chr14:-:190:228	Akt1:NM_001165894:chr12:-:211:249	uORF	0.0408264	0	NA
AKT1S1:NM_001098632:chr19:-:76:183	Akt1s1:NM_026270:chr7:+:46:225	overlap.uORF	0.662555	0.850748	0.778791
AKT2:NM_001243027:chr19:-:164:211	Akt2:NM_001110208:chr7:+:269:316	uORF	0.0661551	0	NA
ALKBH5:NM_017758:chr17:+:298:423	Alkbh5:NM_172943:chr11:+:354:479	uORF	0.182787	0.0865609	2.11166
ALKBH5:NM_017758:chr17:+:420:503	Alkbh5:NM_172943:chr11:+:476:559	uORF	0.155412	0.36923	0.420907
AMBRA1:NM_001267782:chr11:-:132:251	Ambra1:NM_001080754:chr2:+:27:251	uORF	0.49698	0.909558	0.546398
AMBRA1:NM_001267782:chr11:-:248:343	Ambra1:NM_001080754:chr2:+:248:355	uORF	0.55284	0.518414	1.0664
AMPD2:NM_001257360:chr1:+:78:299	Ampd2:NM_028779:chr3:-:177:404	uORF	0.453809	0.791345	0.573465
ANAPC1:NM_022662:chr2:-:96:203	Anapc1:NM_008569:chr2:-:133:300	overlap.uORF	0.312843	0.566601	0.552139
ANKH:NM_054027:chr5:-:12:143	Ank:NM_020332:chr15:+:12:167	uORF	0.0668001	0.193872	0.344558
ANKRA2:NM_023039:chr5:-:592:642	Ankra2:NM_001271388:chr13:+:469:492	uORF	0.055088	0.713466	0.0772119
ANKRD11:NM_001256182:chr16:-:256:363	Ankrd11:NM_001081379:chr8:-:275:421	uORF	0.463138	0.444118	1.04283
ANKRD11:NM_001256182:chr16:-:25:90	Ankrd11:NM_001081379:chr8:-:54:119	uORF	0.106393	0.0289056	3.68071
ANKRD11:NM_001256183:chr16:-:256:360	Ankrd11:NM_001081379:chr8:-:275:421	uORF	0.521801	0.493943	1.0564
ANKRD11:NM_001256183:chr16:-:393:431	Ankrd11:NM_001081379:chr8:-:391:429	uORF	0.131274	1.78978	0.0733463
ANP32E:NM_001136478:chr1:-:93:179	Anp32e:NM_001253757:chr3:+:8:175	uORF	0.244696	0.531309	0.460554
ANTXR2:NM_001145794:chr4:-:505:687	Antxr2:NM_133738:chr5:-:174:290	uORF	0.627949	0.594839	1.05566
AP1AR:NM_001128426:chr4:+:84:164	Ap1ar:NM_145964:chr3:-:68:148	uORF	0.339033	0.54357	0.623716
APBB2:NM_001166050:chr4:-:257:334	Apbb2:NM_001201413:chr5:-:291:368	uORF	0.0537744	0.278627	0.192998
APBB2:NM_001166050:chr4:-:551:616	Apbb2:NM_001201413:chr5:-:504:557	uORF	0.107404	0	NA
ARAP1:NM_001135190:chr11:-:29:265	Arap1:NM_001040112:chr7:+:13:144	uORF	0.491376	0.74387	0.660566
ARF6:NM_001663:chr14:+:195:446	Arf6:NM_007481:chr12:+:199:387	uORF	0.877975	0.688173	1.27581
ARHGEF12:NM_001198665:chr11:+:197:307	Arhgef12:NM_027144:chr9:-:368:511	overlap.uORF	0.248401	0.25789	0.963206
ARHGEF9:NM_001173480:chrX:-:487:666	Arhgef9:NM_001033329:chrX:-:75:254	uORF	0	0.0450154	0
ARID4B:NM_016374:chr1:-:153:458	Arid4b:NM_194262:chr13:+:141:311	overlap.uORF	0.785148	1.0143	0.77408
ARL4A:NM_005738:chr7:+:406:453	Arl4a:NM_007487:chr12:-:77:124	uORF	0.417751	0.736651	0.567094
ARL5A:NM_001037174:chr2:-:92:139	Arl5a:NM_182994:chr2:-:94:357	overlap.uORF	0.283163	0.5184	0.546224
ARL5A:NM_012097:chr2:-:92:262	Arl5a:NM_182994:chr2:-:44:205	uORF	0.13511	0.0929241	1.45399
ARL6:NM_032146:chr3:+:28:129	Arl6:NM_019665:chr16:-:211:312	uORF	0.529177	0.218854	2.41794
ARMCX5-GPRASP2:NM_001199818:chrX:+:181:390	Gprasp1:NM_001004359:chrX:+:119:379	uORF	0.597773	0.837835	0.713473
ARMCX5:NM_001168478:chrX:+:203:388	Gprasp1:NM_001004359:chrX:+:119:379	uORF	0.636503	0.890024	0.715152
ARMCX5:NM_001168479:chrX:+:280:504	Gprasp1:NM_001004359:chrX:+:170:379	uORF	0.674029	1.0161	0.663352
ARMCX5:NM_001168480:chrX:+:280:498	Gprasp1:NM_001004359:chrX:+:170:379	uORF	0.674029	1.13413	0.594314
ARMCX5:NM_001168482:chrX:+:203:373	Gprasp1:NM_001004359:chrX:+:119:379	uORF	0.577965	0.818743	0.705917
ARMCX5:NM_001168485:chrX:+:280:471	Gprasp1:NM_001004359:chrX:+:119:379	uORF	0.626026	0.751177	0.833394
ARMCX5:NM_022838:chrX:+:203:361	Gprasp1:NM_001004359:chrX:+:119:379	uORF	0.541034	0.819052	0.660561
ARMCX6:NM_001184768:chrX:-:127:285	Armcx6:NM_001007578:chrX:-:19:156	uORF	0.498698	0.558395	0.893091
ARMCX6:NM_019007:chrX:-:127:276	Armcx6:NM_001007578:chrX:-:19:156	uORF	0.46256	0.568744	0.813302
ARNTL:NM_001030272:chr11:+:195:236	Arntl:NM_007489:chr7:+:199:270	uORF	0.0675512	0.30226	0.223487
ARNTL:NM_001030272:chr11:+:62:244	Arntl:NM_001243048:chr7:+:96:242	uORF	0.140573	0.156064	0.90074
ARNTL:NM_001178:chr11:+:195:233	Arntl:NM_007489:chr7:+:199:270	uORF	0.339869	0.627899	0.541279
ARNTL:NM_001178:chr11:+:62:319	Arntl:NM_001243048:chr7:+:96:242	uORF	0.140573	0.185551	0.757598
ARSJ:NM_024590:chr4:-:753:887	Arsj:NM_173451:chr3:+:850:921	uORF	0.424131	0.751941	0.564048
ARTN:NM_057090:chr1:+:460:690	Artn:NM_001284191:chr4:-:272:502	uORF	0.187981	0.129614	1.45031
ASAP1:NM_001247996:chr8:-:176:217	Asap1:NM_001276461:chr15:-:103:219	uORF	0.0353006	0.107326	0.328911
ASB7:NM_024708:chr15:+:144:488	Asb7:NM_080443:chr7:-:397:453	uORF	0.121537	0.413564	0.293877
ASB7:NM_024708:chr15:+:668:736	Asb7:NM_080443:chr7:-:605:682	uORF	0.184381	0.911522	0.202279
ASF1A:NM_014034:chr6:+:126:149	Asf1a:NM_025541:chr10:+:19:42	uORF	0	0	NA
ASH1L:NM_018489:chr1:-:387:440	Ash1l:NM_138679:chr3:+:8:73	uORF	0.302404	0.346227	0.873428
ASNSD1:NM_019048:chr2:+:122:412	Asnsd1:NM_133728:chr1:-:80:379	uORF	0.203995	0.645169	0.316189
ASUN:NM_018164:chr12:-:477:530	Asun:NM_138757:chr6:-:414:539	uORF	0.476705	0.191578	2.48831
ATF2:NM_001256090:chr2:-:35:124	Atf2:NM_001025093:chr2:-:43:96	uORF	0.084132	0.268207	0.313683
ATF2:NM_001256092:chr2:-:236:283	Atf2:NM_001025093:chr2:-:242:289	uORF	0.202978	0.60286	0.336692
ATF4:NM_001675:chr22:+:153:179	Atf4:NM_001287180:chr15:+:184:210	uORF	0.063367	0.145888	0.434355
ATG13:NM_001142673:chr11:+:313:360	Atg13:NM_145528:chr2:-:66:101	uORF	0.109499	0.375581	0.291545
ATG13:NM_001142673:chr11:+:575:658	Atg13:NM_145528:chr2:-:306:440	overlap.uORF	0.241302	1.77769	0.135739
ATG13:NM_001205122:chr11:+:575:649	Atg13:NM_145528:chr2:-:306:440	overlap.uORF	0.336595	0.495964	0.678668
ATG4C:NM_032852:chr1:+:198:233	Atg4c:NM_001145967:chr4:+:158:193	uORF	0.120858	0.184169	0.656231
ATG9A:NM_001077198:chr2:-:148:186	Atg9a:NM_001003917:chr1:-:233:271	uORF	0.116643	0.132586	0.87975
ATOH8:NM_032827:chr2:+:153:218	Atoh8:NM_153778:chr6:-:111:176	uORF	0.0434075	0.0671042	0.646867
ATP2B1:NM_001001323:chr12:-:64:99	Atp2b1:NM_026482:chr10:+:324:359	uORF	0.0731312	0.278627	0.26247
ATP2B4:NM_001001396:chr1:+:525:575	Atp2b4:NM_001167949:chr1:-:91:285	uORF	0.284098	0.107989	2.6308
ATP5J:NM_001003703:chr21:-:611:751	Atp5j:NM_016755:chr16:-:189:281	uORF	0.0821795	0.0819479	1.00283
ATXN1:NM_000332:chr6:-:234:371	Atxn1:NM_001199304:chr13:-:46:351	uORF	0.324469	0.497129	0.652686
ATXN1:NM_000332:chr6:-:556:627	Atxn1:NM_001199304:chr13:-:537:572	uORF	0.0797525	0.170254	0.468432
ATXN1:NM_001128164:chr6:-:62:322	Atxn1:NM_001199304:chr13:-:46:351	uORF	0.154325	0.293087	0.526549
AVPI1:NM_021732:chr10:-:85:150	Avpi1:NM_027106:chr19:-:50:133	uORF	0.353567	0.468337	0.754942
AZI2:NM_001134432:chr3:-:344:430	Azi2:NM_001048146:chr9:+:257:340	uORF	0.228877	0.379068	0.603789
AZIN1:NM_015878:chr8:-:253:306	Azin1:NM_001102458:chr15:-:248:301	uORF	0	0	NA
AZIN1:NM_015878:chr8:-:411:467	Azin1:NM_001102458:chr15:-:406:462	uORF	0	0	NA
AZIN1:NM_015878:chr8:-:464:592	Azin1:NM_001102458:chr15:-:437:586	uORF	0.0922121	0.0949248	0.971423
AZIN1:NM_015878:chr8:-:499:663	Azin1:NM_001102458:chr15:-:493:627	uORF	0.0626856	0.0316885	1.97818
AZIN1:NM_015878:chr8:-:711:740	Azin1:NM_001102458:chr15:-:719:748	uORF	0	0	NA
AZIN1:NM_148174:chr8:-:467:517	Azin1:NM_018745:chr15:-:437:511	uORF	0.162636	0.0497713	3.26766
B3GNT5:NM_032047:chr3:+:289:375	B3gnt5:NM_001159407:chr16:+:953:1042	uORF	0.559556	1.60528	0.348571
B4GALT2:NM_003780:chr1:+:224:295	B4galt2:NM_001253381:chr4:-:183:254	uORF	0.192222	0.137466	1.39832
B4GALT3:NM_001199873:chr1:-:444:524	B4galt3:NM_020579:chr1:+:27:68	uORF	0.0947993	0.27295	0.347314
B4GALT3:NM_001199873:chr1:-:620:685	B4galt3:NM_020579:chr1:+:186:251	uORF	0.144995	0.359929	0.402845
BAG5:NM_001015048:chr14:-:181:207	Bag5:NM_027404:chr12:-:195:221	uORF	0.0567309	0.473353	0.119849
BBX:NM_001142568:chr3:+:183:314	Bbx:NM_027444:chr16:-:93:290	uORF	0.0747872	0.143342	0.52174
BBX:NM_001142568:chr3:+:31:60	Bbx:NM_027444:chr16:-:6:92	uORF	0	0	NA
BCL2L1:NM_001191:chr20:-:209:313	Bcl2l1:NM_009743:chr2:-:81:185	uORF	0.425194	0.566648	0.750367
BCL2L1:NM_001191:chr20:-:334:363	Bcl2l1:NM_001289716:chr2:-:412:441	uORF	0	0.212681	0
BCL2L2-PABPN1:NM_001199864:chr14:+:142:201	Bcl2l2:NM_007537:chr14:+:103:150	uORF	0.128652	0.204677	0.62856
BCL2L2:NM_001199839:chr14:+:49:156	Bcl2l2:NM_007537:chr14:+:103:150	uORF	0.128652	0.204677	0.62856
BCL6:NM_001130845:chr3:-:405:449	Bcl6:NM_009744:chr16:-:53:181	overlap.uORF	0	0.321341	0
BCL6:NM_001134738:chr3:-:3:41	Bcl6:NM_009744:chr16:-:53:181	overlap.uORF	0	0.321341	0
BCL6:NM_001706:chr3:-:282:341	Bcl6:NM_009744:chr16:-:4:63	uORF	0.0726001	0	NA
BCLAF1:NM_001077440:chr6:-:50:109	Bclaf1:NM_001025392:chr10:+:43:87	uORF	0.138147	0.40969	0.337198
BDNF:NM_001143813:chr11:-:188:283	Bdnf:NM_001048142:chr2:+:30:305	uORF	0.247061	0.969922	0.254722
BECN1:NM_003766:chr17:-:44:103	Becn1:NM_019584:chr11:-:42:101	uORF	0.141419	0.118783	1.19057
BFAR:NM_016561:chr16:+:212:277	Bfar:NM_001177552:chr16:+:226:291	uORF	0.2124	0.253008	0.839501
BLCAP:NM_006698:chr20:-:123:158	Blcap:NM_016916:chr2:-:98:133	uORF	0.0445221	0.23633	0.188389
BLZF1:NM_003666:chr1:+:142:222	Blzf1:NM_001160208:chr1:-:56:118	uORF	0.503867	0.6396	0.787784
BLZF1:NM_003666:chr1:+:261:308	Blzf1:NM_001160208:chr1:-:111:203	uORF	0.364393	0.992666	0.367086
BMI1:NM_005180:chr10:+:25:114	Bmi1:NM_007552:chr2:+:37:99	uORF	0.122885	0.217537	0.564894
BMI1:NM_005180:chr10:+:388:420	Bmi1:NM_007552:chr2:+:353:385	uORF	0.0428062	0	NA
BMPR1A:NM_004329:chr10:+:261:326	Bmpr1a:NM_009758:chr14:-:132:197	uORF	0.172545	0.198391	0.869722
BMPR1A:NM_004329:chr10:+:293:382	Bmpr1a:NM_009758:chr14:-:164:289	uORF	0.18829	0.443491	0.424563
BMPR2:NM_001204:chr2:+:785:841	Bmpr2:NM_007561:chr1:+:9:65	uORF	0.0247031	0.082169	0.300637
BMPR2:NM_001204:chr2:+:883:957	Bmpr2:NM_007561:chr1:+:103:183	uORF	0.164752	0.189517	0.869329
BPGM:NM_001724:chr7:+:60:176	Bpgm:NM_007563:chr6:+:16:84	uORF	0.431005	0.879354	0.490139
BRPF1:NM_001003694:chr3:+:239:394	Brpf1:NM_001282126:chr6:+:409:438	uORF	0.0446009	0.313212	0.142399
BRWD3:NM_153252:chrX:-:91:114	Brwd3:NM_001081477:chrX:-:55:78	uORF	0	0	NA
BTBD10:NM_032320:chr11:-:203:235	Btbd10:NM_133700:chr7:-:296:328	uORF	0	0	NA
BTBD11:NM_001018072:chr12:+:181:402	Btbd11:NM_028709:chr10:+:224:313	uORF	0.328062	0.455308	0.720528
BTBD11:NM_001018072:chr12:+:317:382	Btbd11:NM_028709:chr10:+:310:372	uORF	0.414244	1.19251	0.34737
BTBD7:NM_001002860:chr14:-:111:320	Btbd7:NM_172806:chr12:-:346:444	uORF	0.0691521	0.105561	0.655092
BTBD7:NM_001002860:chr14:-:24:62	Btbd7:NM_172806:chr12:-:1:39	uORF	0.120673	0.119027	1.01382
BTG1:NM_001731:chr12:-:69:140	Btg1:NM_007569:chr10:+:58:96	uORF	0	0.106884	0
BZW1:NM_001207067:chr2:+:395:439	Bzw1:NM_025824:chr1:+:31:75	uORF	0.196718	0	NA
C10orf47:NM_153256:chr10:+:93:125	Proser2:NM_001159657:chr2:-:313:345	uORF	0.169226	0.846804	0.199841
C11orf24:NM_022338:chr11:-:145:330	1810055G02Rik:NM_028077:chr19:+:188:364	uORF	0.447275	0.481651	0.928629
C11orf30:NM_020193:chr11:+:9:80	2210018M11Rik:NM_172280:chr7:-:37:72	uORF	0	0	NA
C11orf57:NM_001082970:chr11:+:618:677	AU019823:NM_001134902:chr9:-:59:268	uORF	0.128978	0.49248	0.261895
C1orf21:NM_030806:chr1:+:140:367	1700025G04Rik:NM_197990:chr1:-:159:440	uORF	0.184339	0.319498	0.576963
C1orf21:NM_030806:chr1:+:195:404	1700025G04Rik:NM_197990:chr1:-:159:440	uORF	0.505472	1.25383	0.403142
C1orf21:NM_030806:chr1:+:434:472	1700025G04Rik:NM_197990:chr1:-:475:513	uORF	0.078783	0	NA
C1orf43:NM_001098616:chr1:-:280:336	4933434E20Rik:NM_001287086:chr3:+:144:170	uORF	0.117187	0.489244	0.239527
C5orf30:NM_033211:chr5:+:183:224	D1Ertd622e:NM_133825:chr1:-:215:256	uORF	0.18417	0.129943	1.41731
C6orf62:NM_030939:chr6:-:290:331	BC005537:NM_024473:chr13:+:1508:1549	uORF	0.0341735	0.26126	0.130802
C8orf44-SGK3:NM_001204173:chr8:+:518:562	Sgk3:NM_001037759:chr1:+:110:160	uORF	0.180173	0.239372	0.752691
C9orf69:NM_152833:chr9:-:283:444	C330006A16Rik:NM_001256521:chr2:-:250:405	uORF	0.281399	0.221495	1.27045
C9orf69:NM_152833:chr9:-:76:231	C330006A16Rik:NM_001256521:chr2:-:25:216	uORF	0.389126	0.446314	0.871865
CAB39L:NM_001079670:chr13:-:172:249	Cab39l:NM_026908:chr14:+:114:203	uORF	0.398978	0.632643	0.630652
CAB39L:NM_001079670:chr13:-:38:118	Cab39l:NM_026908:chr14:+:6:86	uORF	0.273353	0.230529	1.18576
CACYBP:NM_014412:chr1:+:189:332	Cacybp:NM_009786:chr1:-:37:213	uORF	0.40331	0.425759	0.947274
CALM3:NM_005184:chr19:+:80:148	Calm3:NM_007590:chr7:-:90:152	uORF	0.0626335	0.219457	0.285402
CAMK2D:NM_001221:chr4:-:58:768	Camk2d:NM_001025438:chr3:+:212:394	uORF	0.374564	0.988392	0.378963
CAMTA2:NM_015099:chr17:-:36:113	Camta2:NM_001190376:chr11:-:183:260	uORF	0	0	NA
CAND1:NM_018448:chr12:+:178:213	Cand1:NM_027994:chr10:-:87:122	uORF	0.14568	0.454401	0.320599
CANX:NM_001746:chr5:+:121:171	Canx:NM_007597:chr11:-:127:243	overlap.uORF	0.372463	1.48056	0.251569
CAPZA1:NM_006135:chr1:+:267:323	Capza1:NM_009797:chr3:-:3:140	overlap.uORF	0.175949	0.413046	0.425979
CASKIN2:NM_020753:chr17:-:189:293	Caskin2:NM_080643:chr11:-:122:226	uORF	0.188601	0.188167	1.00231
CCDC71:NM_022903:chr3:-:29:133	Ccdc71:NM_133744:chr9:+:43:255	overlap.uORF	0.0700135	0.210876	0.332013
CCDC80:NM_199511:chr3:-:508:570	Ccdc80:NM_026439:chr16:+:138:200	uORF	0.185862	0.531659	0.349589
CCDC82:NM_024725:chr11:-:26:211	Ccdc82:NM_025534:chr9:+:59:127	uORF	0.143945	0.0977174	1.47308
CCDC85A:NM_001080433:chr2:+:234:332	Ccdc85a:NM_001166661:chr11:-:490:588	uORF	0.290624	0.407588	0.713033
CCNK:NM_001099402:chr14:+:24:56	Ccnk:NM_009832:chr12:+:89:121	uORF	0.0695386	0.447849	0.155272
CCPG1:NM_004748:chr15:-:34:177	Ccpg1:NM_001114328:chr9:+:25:186	overlap.uORF	0.639825	1.42751	0.44821
CDC25A:NM_001789:chr3:-:16:255	Cdc25a:NM_007658:chr9:+:93:296	uORF	0.354426	0.307099	1.15411
CDC27:NM_001114091:chr17:-:49:117	Cdc27:NM_001285988:chr11:-:153:221	uORF	0.0609155	0.0711886	0.855693
CDC42SE1:NM_001038707:chr1:-:433:549	Cdc42se1:NM_172395:chr3:+:343:675	uORF	0.416503	0.510569	0.815762
CDC42SE1:NM_020239:chr1:-:99:251	Cdc42se1:NM_172395:chr3:+:343:675	uORF	0.581318	0.862892	0.673685
CDC42SE2:NM_020240:chr5:+:122:181	Cdc42se2:NM_178626:chr11:-:69:278	uORF	0.177476	0.101018	1.75687
CDH11:NM_001797:chr16:-:209:256	Cdh11:NM_009866:chr8:-:269:328	uORF	0.0284474	0.652765	0.0435798
CDH11:NM_001797:chr16:-:292:342	Cdh11:NM_009866:chr8:-:367:414	uORF	0.365379	0.796683	0.458625
CDH11:NM_001797:chr16:-:2:40	Cdh11:NM_009866:chr8:-:81:119	uORF	0	0.103613	0
CDH11:NM_001797:chr16:-:41:196	Cdh11:NM_009866:chr8:-:120:242	uORF	0.197917	0.376661	0.525452
CDK16:NM_006201:chrX:+:293:406	Cdk16:NM_011049:chrX:+:178:291	uORF	0.0265254	0.0607756	0.436447
CDK4:NM_000075:chr12:-:106:138	Cdk4:NM_009870:chr10:+:0:23	uORF	0	0	NA
CDK4:NM_000075:chr12:-:155:271	Cdk4:NM_009870:chr10:+:40:192	overlap.uORF	0.261005	0.40606	0.642775
CDR2L:NM_014603:chr17:+:271:372	Cdr2l:NM_001080929:chr11:+:262:369	uORF	0.296124	0.0710225	4.16945
CELF1:NM_001172639:chr11:-:742:861	Celf1:NM_017368:chr2:+:255:326	uORF	0.0764718	0	NA
CENPL:NM_001127181:chr1:-:546:596	Cenpl:NM_001159930:chr1:+:415:459	uORF	0.180162	0.380259	0.473787
CEP350:NM_014810:chr1:+:52:81	Cep350:NM_001039184:chr1:-:87:116	uORF	0.053871	0.141345	0.381132
CGGBP1:NM_001008390:chr3:-:189:266	Cggbp1:NM_178647:chr16:+:159:236	uORF	0.0523933	0.310868	0.168539
CHCHD7:NM_001011670:chr8:+:28:84	Chchd7:NM_001190322:chr4:+:6:146	uORF	0.253915	0.399163	0.63612
CHD2:NM_001042572:chr15:+:130:306	Chd2:NM_001081345:chr7:-:269:301	uORF	0	0	NA
CHD9:NM_025134:chr16:+:64:114	Chd9:NM_177224:chr8:+:213:299	uORF	0.250626	0.371654	0.674354
CHIC2:NM_012110:chr4:-:116:145	Chic2:NM_028850:chr5:-:123:158	uORF	0.123948	0.371712	0.333451
CHN1:NM_001206602:chr2:-:94:132	Chn1:NM_001166604:chr2:-:86:160	uORF	0.123726	0.740116	0.167172
CHPF2:NM_019015:chr7:+:734:790	Chpf2:NM_133913:chr5:+:553:594	uORF	0.188393	0.675041	0.279083
CHST15:NM_001270764:chr10:-:271:354	Chst15:NM_029935:chr7:-:196:276	uORF	0.368114	0.498732	0.738099
CHST15:NM_001270764:chr10:-:419:544	Chst15:NM_029935:chr7:-:325:492	uORF	0.536846	0.473753	1.13318
CHST2:NM_004267:chr3:+:287:424	Chst2:NM_018763:chr9:-:217:351	uORF	0.341891	0.424356	0.805671
CHST2:NM_004267:chr3:+:463:624	Chst2:NM_018763:chr9:-:105:635	uORF	0.291138	0.18374	1.58451
CHST2:NM_004267:chr3:+:787:939	Chst2:NM_018763:chr9:-:715:876	uORF	0.070208	0.22929	0.306197
CHSY1:NM_014918:chr15:-:18:389	Chsy1:NM_001081163:chr7:+:8:295	uORF	0.116248	0.120491	0.964781
CHTOP:NM_001206612:chr1:+:101:211	Chtop:NM_023215:chr3:-:52:147	uORF	0.251459	1.62404	0.154835
CITED4:NM_133467:chr1:-:81:179	Cited4:NM_019563:chr4:+:52:255	overlap.uORF	0.287511	0.461743	0.622666
CKS1B:NM_001826:chr1:+:44:82	Cks1b:NM_016904:chr3:-:15:56	uORF	0.132958	0.324907	0.409217
CLASP1:NM_001142273:chr2:-:121:192	Clasp1:NM_001081276:chr1:+:480:551	uORF	0.10297	0.0611358	1.68429
CLASP1:NM_001142273:chr2:-:156:359	Clasp1:NM_001081276:chr1:+:593:706	uORF	0.319652	0.326339	0.97951
CLDN7:NM_001185022:chr17:-:17:169	Cldn7:NM_016887:chr11:+:243:335	uORF	0.386918	0.614726	0.629415
CLDN7:NM_001185023:chr17:-:689:736	Cldn7:NM_016887:chr11:+:243:335	uORF	0.207474	0.446076	0.46511
CLDND1:NM_001040181:chr3:-:111:185	Cldn25:NM_001252450:chr16:+:68:163	uORF	0.0981801	0.00860573	11.4087
CLIP1:NM_001247997:chr12:-:12:77	Clip1:NM_019765:chr5:-:12:68	uORF	0.178621	0.298334	0.59873
CLMP:NM_024769:chr11:-:230:328	Clmp:NM_133733:chr9:+:162:395	overlap.uORF	0.513	0.536186	0.956758
CNOT1:NM_001265612:chr16:-:164:205	Cnot1:NM_001205226:chr8:-:135:176	uORF	0.0322414	0.150978	0.21355
CNOT4:NM_001008225:chr7:-:49:87	Cnot4:NM_001164411:chr6:-:46:84	uORF	0	0.246819	0
CNPY2:NM_001190991:chr12:-:242:337	Cnpy2:NM_019953:chr10:+:37:339	uORF	0.217852	0.725518	0.300271
CNRIP1:NM_001111101:chr2:-:390:518	Cnrip1:NM_029861:chr11:+:7:120	uORF	0.286467	0.37	0.774233
CNST:NM_001139459:chr1:+:257:301	Cnst:NM_146105:chr1:+:18:62	uORF	0.107607	0.187193	0.574842
COL4A6:NM_033641:chrX:-:18:131	Col4a6:NM_053185:chrX:-:8:160	uORF	0.627667	0.795237	0.789283
COL6A3:NM_004369:chr2:-:18:176	Col6a3:NM_001243008:chr1:-:77:145	uORF	0.492568	1.78951	0.275252
COL8A1:NM_001850:chr3:+:124:225	Col8a1:NM_007739:chr16:-:84:893	overlap.uORF	0.637551	0.797472	0.799465
COL8A1:NM_020351:chr3:+:26:163	Col8a1:NM_007739:chr16:-:84:893	overlap.uORF	0.682268	1.03787	0.657372
COPS7A:NM_001164094:chr12:+:63:239	Cops7a:NM_001164089:chr6:-:46:174	overlap.uORF	0.265031	0.429223	0.617467
COPS7A:NM_001164095:chr12:+:135:215	Cops7a:NM_012003:chr6:-:7:159	overlap.uORF	0.353267	0.519126	0.680503
COPS7A:NM_016319:chr12:+:33:182	Cops7a:NM_001164089:chr6:-:46:174	overlap.uORF	0.265031	0.429223	0.617467
CPED1:NM_024913:chr7:+:107:208	Cped1:NM_001081351:chr6:+:18:182	uORF	0.209905	0.0729679	2.87667
CPED1:NM_024913:chr7:+:175:258	Cped1:NM_001081351:chr6:+:195:221	uORF	0.115094	0	NA
CPNE1:NM_152925:chr20:-:78:158	Cpne1:NM_170588:chr2:-:43:141	uORF	0.211798	0.246431	0.859462
CPSF2:NM_017437:chr14:+:34:87	Cpsf2:NM_016856:chr12:+:22:69	uORF	0.276766	0.47238	0.585897
CPSF3:NM_016207:chr2:+:137:184	Cpsf3:NM_018813:chr12:+:89:142	uORF	0.329345	0.675041	0.487889
CREB1:NM_004379:chr2:+:160:222	Creb1:NM_001037726:chr1:+:134:196	uORF	0	0.0698178	0
CREB3L2:NM_001253775:chr7:-:100:147	Creb3l2:NM_178661:chr6:-:66:113	uORF	0.154883	0.642374	0.241111
CREB3L4:NM_001255978:chr1:+:84:209	Creb3l4:NM_030080:chr3:-:83:181	uORF	0.403124	1.0911	0.369467
CREBL2:NM_001310:chr12:+:25:102	Crebl2:NM_177687:chr6:+:7:63	uORF	0.154539	0.288414	0.535824
CRY1:NM_004075:chr12:-:518:841	Cry1:NM_007771:chr10:-:129:518	uORF	0.216073	0.530536	0.407273
CSDE1:NM_001007553:chr1:-:127:159	Csde1:NM_001161854:chr3:+:125:157	uORF	0	0	NA
CSDE1:NM_001007553:chr1:-:156:236	Csde1:NM_001161854:chr3:+:154:345	uORF	0.523478	0.319521	1.63832
CSDE1:NM_001007553:chr1:-:325:387	Csde1:NM_001161854:chr3:+:320:382	uORF	0.0218887	0	NA
CSDE1:NM_001007553:chr1:-:347:445	Csde1:NM_001161854:chr3:+:267:455	uORF	0.147906	0.270584	0.54662
CSE1L:NM_001256135:chr20:+:142:186	Cse1l:NM_023565:chr2:+:13:156	overlap.uORF	0.27043	0.471563	0.573475
CSK:NM_001127190:chr15:+:72:155	Csk:NM_007783:chr9:-:140:223	uORF	0.125295	0.228131	0.549226
CSK:NM_004383:chr15:+:231:563	Csk:NM_007783:chr9:-:17:223	uORF	0.229683	0.441986	0.519662
CSNK1D:NM_001893:chr17:-:26:52	Csnk1d:NM_027874:chr11:-:17:43	uORF	0	0	NA
CSNK1G2:NM_001319:chr19:+:299:382	Csnk1g2:NM_001159591:chr10:+:117:200	uORF	0.380476	1.14971	0.330932
CSNK1G2:NM_001319:chr19:+:90:269	Csnk1g2:NM_134002:chr10:+:32:130	uORF	0.32496	0.363939	0.892896
CSNK1G3:NM_001031812:chr5:+:129:236	Csnk1g3:NM_152809:chr18:+:182:289	uORF	0.162199	0.1915	0.846993
CSNK1G3:NM_001031812:chr5:+:415:501	Csnk1g3:NM_152809:chr18:+:308:517	uORF	0.205493	0.199826	1.02836
CSNK1G3:NM_001031812:chr5:+:562:609	Csnk1g3:NM_152809:chr18:+:577:624	uORF	0.222583	0	NA
CSNK1G3:NM_001031812:chr5:+:603:683	Csnk1g3:NM_152809:chr18:+:654:698	uORF	0.216279	0.565996	0.382122
CSNK1G3:NM_001031812:chr5:+:79:147	Csnk1g3:NM_152809:chr18:+:132:200	uORF	0.0877612	0.0587276	1.49438
CSNK2A1:NM_001895:chr20:-:206:274	Csnk2a1:NM_007788:chr2:+:29:259	uORF	0.0986229	0.235681	0.418459
CSNK2A1:NM_177559:chr20:-:281:391	Csnk2a1:NM_007788:chr2:+:29:259	uORF	0.170629	0.247471	0.689494
CSRNP2:NM_030809:chr12:-:340:363	Csrnp2:NM_153407:chr15:-:213:236	uORF	0.0582252	0	NA
CTBP1:NM_001012614:chr4:-:291:389	Ctbp1:NM_001198860:chr5:-:310:408	uORF	0.11714	0.334503	0.35019
CTBP2:NM_001083914:chr10:-:259:309	Ctbp2:NM_009980:chr7:-:73:423	uORF	0.204015	0.54548	0.374011
CTBP2:NM_001329:chr10:-:191:241	Ctbp2:NM_009980:chr7:-:255:416	uORF	0.25515	0.207989	1.22675
CTDNEP1:NM_001143775:chr17:-:179:235	Ctdnep1:NM_026017:chr11:+:88:171	uORF	0.109695	0.236241	0.464338
CTNND1:NM_001085458:chr11:+:100:411	Ctnnd1:NM_001085448:chr2:-:220:333	uORF	0.49867	0.700763	0.711609
CTNND1:NM_001085460:chr11:+:100:408	Ctnnd1:NM_007615:chr2:-:382:462	uORF	0.49283	0.196012	2.51429
CTNND1:NM_001085462:chr11:+:100:294	Ctnnd1:NM_001085448:chr2:-:220:333	uORF	0.493186	0.638296	0.77266
CTNND1:NM_001206883:chr11:+:100:318	Ctnnd1:NM_001085448:chr2:-:220:333	uORF	0.512033	0.650529	0.787102
CTNND1:NM_001206889:chr11:+:100:459	Ctnnd1:NM_007615:chr2:-:382:462	uORF	0.519367	0.494117	1.0511
CUL1:NM_003592:chr7:+:200:250	Cul1:NM_012042:chr6:+:171:221	uORF	0.0874534	0.31521	0.277445
CUL5:NM_003478:chr11:+:359:466	Cul5:NM_001161618:chr9:-:73:252	overlap.uORF	0.266118	0.443749	0.599704
CWC22:NM_020943:chr2:-:190:273	Cwc22:NM_030560:chr2:-:265:315	uORF	0.268184	0.408807	0.656017
CYLD:NM_001042355:chr16:+:156:251	Cyld:NM_001128170:chr8:+:100:207	uORF	0.211861	1.10957	0.190939
DAG1:NM_001165928:chr3:+:47:340	Dag1:NM_001276485:chr9:-:8:286	uORF	0.432116	0.694903	0.621837
DAG1:NM_001165928:chr3:+:680:703	Dag1:NM_001276481:chr9:-:352:375	uORF	0.0616105	0.295607	0.208421
DAG1:NM_001177634:chr3:+:47:379	Dag1:NM_001276485:chr9:-:8:286	uORF	0.473253	0.537817	0.87995
DAG1:NM_001177640:chr3:+:298:357	Dag1:NM_010017:chr9:-:175:390	uORF	0.297549	0.211388	1.40759
DCAF11:NM_025230:chr14:+:459:566	Dcaf11:NM_001199009:chr14:+:16:258	uORF	0.36023	0.434384	0.82929
DCAF11:NM_025230:chr14:+:637:684	Dcaf11:NM_001199009:chr14:+:164:247	uORF	0.132803	0.0872963	1.52129
DCAF6:NM_001017977:chr1:+:154:225	Dcaf6:NM_028759:chr1:-:25:96	uORF	0.279657	0.705128	0.396604
DCAF8:NM_015726:chr1:-:103:171	Dcaf8:NM_153555:chr1:+:139:216	uORF	0.273492	0.595296	0.459421
DCAF8:NM_015726:chr1:-:51:122	Dcaf8:NM_153555:chr1:+:0:200	uORF	0.0847757	0.321986	0.26329
DCLRE1B:NM_022836:chr1:+:203:277	Dclre1b:NM_001025312:chr3:-:190:402	uORF	0.281358	0.445874	0.631027
DCUN1D3:NM_173475:chr16:-:62:121	Dcun1d3:NM_001163703:chr7:-:112:273	uORF	0.0831129	0.130626	0.636267
DDIT3:NM_001195053:chr12:-:37:141	Ddit3:NM_007837:chr10:+:36:140	uORF	0.0364832	0.353099	0.103323
DDR2:NM_001014796:chr1:+:222:356	Ddr2:NM_022563:chr1:-:17:148	uORF	0.223379	0.553689	0.403438
DDX6:NM_001257191:chr11:-:104:133	Ddx6:NM_001110826:chr9:+:103:132	uORF	0.049152	0	NA
DDX6:NM_001257191:chr11:-:156:314	Ddx6:NM_001110826:chr9:+:182:313	uORF	0.493144	0.884861	0.557312
DEDD2:NM_001270615:chr19:-:95:172	Dedd2:NM_207677:chr7:-:7:93	uORF	0.139956	0.0512869	2.72888
DEDD:NM_001039711:chr1:-:112:192	Dedd:NM_001128609:chr1:+:143:469	uORF	0.215736	0.111352	1.93743
DEDD:NM_001039712:chr1:-:101:163	Dedd:NM_001128609:chr1:+:143:469	uORF	0.291327	0.243372	1.19704
DEDD:NM_032998:chr1:-:112:225	Dedd:NM_001128609:chr1:+:143:469	uORF	0.20138	0.124941	1.6118
DEF8:NM_001242817:chr16:+:133:237	Def8:NM_001281803:chr8:+:183:368	overlap.uORF	0.593939	0.700444	0.847946
DENND2C:NM_001256404:chr1:-:540:617	Dennd2c:NM_177857:chr3:+:147:395	overlap.uORF	0.311011	0.443381	0.701452
DENND2C:NM_198459:chr1:-:114:248	Dennd2c:NM_177857:chr3:+:147:395	overlap.uORF	0.353773	0.523839	0.675347
DENND5A:NM_001243254:chr11:-:52:153	Dennd5a:NM_021494:chr7:-:51:149	uORF	0.130266	0.189246	0.68834
DGCR8:NM_001190326:chr22:+:179:229	Dgcr8:NM_033324:chr16:-:93:143	uORF	0.085642	0.501849	0.170653
DGKZ:NM_001199266:chr11:+:153:188	Dgkz:NM_138306:chr2:-:16:51	uORF	0.225761	0.15761	1.4324
DHX30:NM_014966:chr3:+:262:297	Dhx30:NM_001252682:chr9:-:217:252	uORF	0.0885161	0	NA
DHX30:NM_014966:chr3:+:323:397	Dhx30:NM_001252682:chr9:-:275:349	uORF	0.0542846	0.452698	0.119913
DIS3L2:NM_001257281:chr2:+:186:224	Dis3l2:NM_001172157:chr1:+:29:112	uORF	0.0404879	0.354117	0.114335
DMTF1:NM_001142326:chr7:+:173:238	Dmtf1:NM_001110327:chr5:-:48:206	uORF	0.265248	0.652765	0.406345
DMTF1:NM_001142326:chr7:+:249:317	Dmtf1:NM_001110327:chr5:-:215:283	uORF	0.310734	0.656793	0.473108
DNAJB4:NM_007034:chr1:+:89:142	Dnajb4:NM_025926:chr3:-:164:292	overlap.uORF	0.0570152	0	NA
DOLK:NM_014908:chr9:-:282:425	Dolk:NM_177648:chr2:-:48:326	overlap.uORF	0.516538	0.790066	0.653791
DR1:NM_001938:chr1:+:229:300	Dr1:NM_026106:chr5:+:245:310	uORF	0.184559	0.106106	1.73939
DSEL:NM_032160:chr18:-:720:854	Dsel:NM_001081316:chr1:-:1146:1235	uORF	0.25269	0.543053	0.465314
DSEL:NM_032160:chr18:-:844:915	Dsel:NM_001081316:chr1:-:1253:1324	uORF	0.561643	0	NA
DSEL:NM_032160:chr18:-:986:1066	Dsel:NM_001081316:chr1:-:1439:1480	uORF	0.147997	0.426772	0.346784
DUSP10:NM_007207:chr1:-:108:152	Dusp10:NM_022019:chr1:+:24:104	uORF	0.170969	0.25359	0.674196
DUSP16:NM_030640:chr12:-:484:528	Dusp16:NM_001048054:chr6:-:413:574	uORF	0.370419	0.573756	0.645603
DUSP16:NM_030640:chr12:-:615:695	Dusp16:NM_001048054:chr6:-:565:645	uORF	0.0345813	0.114584	0.301799
DUSP18:NM_152511:chr22:-:287:481	Dusp18:NM_173745:chr11:+:219:317	uORF	0.453238	1.4056	0.322451
DVL2:NM_004422:chr17:-:181:237	Dvl2:NM_007888:chr11:+:21:161	uORF	0.164271	0.0955594	1.71904
DYNLL1:NM_001037495:chr12:+:59:103	Dynll1:NM_019682:chr5:-:58:102	uORF	0.239828	0.927572	0.258554
E2F8:NM_024680:chr11:-:322:420	E2f8:NM_001013368:chr7:-:275:385	uORF	0.585311	0.920237	0.636044
EBAG9:NM_004215:chr8:+:110:343	Ebag9:NM_019480:chr15:+:76:222	uORF	0.434369	0.458741	0.946873
EDEM3:NM_025191:chr1:-:76:180	Edem3:NM_001039644:chr1:+:42:332	overlap.uORF	0.323653	0.496843	0.651419
EEF1A1:NM_001402:chr6:-:16:54	Eef1a1:NM_010106:chr9:-:69:107	uORF	0.20108	0	NA
EEF1B2:NM_001959:chr2:+:106:231	Eef1b2:NM_018796:chr1:+:105:209	uORF	0.586282	0.633728	0.925132
EGLN2:NM_080732:chr19:+:53:151	Egln2:NM_053208:chr7:-:52:150	uORF	0.106226	0.229112	0.463645
EGLN3:NM_022073:chr14:-:123:269	Egln3:NM_028133:chr12:-:167:334	overlap.uORF	0.467792	0.446179	1.04844
EHBP1:NM_001142614:chr2:+:155:184	Ehbp1:NM_001252515:chr11:-:268:297	uORF	0.140522	0	NA
EHBP1:NM_001142616:chr2:+:13:144	Ehbp1:NM_001252515:chr11:-:8:91	uORF	0.0816448	0.432247	0.188885
EHBP1L1:NM_001099409:chr11:+:184:237	Ehbp1l1:NM_001114595:chr19:-:215:268	uORF	0.187244	0.335423	0.558232
EI24:NM_001007277:chr11:+:69:137	Ei24:NM_001199494:chr9:-:53:229	overlap.uORF	0.342762	0.405295	0.845711
EIF2C3:NM_024852:chr1:+:341:436	Ago3:NM_153402:chr4:-:252:347	overlap.uORF	0.0731682	0.0485369	1.50748
EIF4G1:NM_001194946:chr3:+:115:177	Eif4g1:NM_001005331:chr16:+:63:125	uORF	0	0	NA
EIF4G1:NM_001194947:chr3:+:174:197	Eif4g1:NM_001005331:chr16:+:122:145	uORF	0	0	NA
EIF4G2:NM_001042559:chr11:-:131:181	Eif4g2:NM_001040131:chr7:-:46:96	uORF	0.0908816	0.0814936	1.1152
EIF4G3:NM_001198801:chr1:-:29:55	Eif4g3:NM_001256195:chr4:+:34:60	uORF	0	0	NA
EIF5A:NM_001970:chr17:+:57:128	Eif5a:NM_001166589:chr11:-:54:125	uORF	0	0.0470588	0
ELF2:NM_201999:chr4:-:13:105	Elf2:NM_023502:chr3:-:13:105	uORF	0.171046	0.390638	0.437864
ELFN2:NM_052906:chr22:-:337:426	Elfn2:NM_183141:chr15:-:99:215	uORF	0.439867	1.49135	0.294945
ELK3:NM_005230:chr12:+:207:242	Elk3:NM_001282967:chr10:-:330:365	uORF	0	0.118941	0
ELK4:NM_001973:chr1:-:1057:1167	Elk4:NM_007923:chr1:+:165:260	uORF	0.297825	0.412512	0.72198
ELMOD3:NM_001135021:chr2:+:273:560	Elmod3:NM_001253692:chr6:-:156:197	uORF	0.427343	1.44672	0.295387
ELMOD3:NM_001135022:chr2:+:314:376	Elmod3:NM_001253692:chr6:-:156:197	uORF	0.427343	1.44672	0.295387
ENG:NM_000118:chr9:-:274:381	Eng:NM_001146348:chr2:+:224:331	uORF	0.0581221	0.332891	0.174598
ENOX2:NM_006375:chrX:-:330:398	Enox2:NM_001271447:chrX:-:298:366	uORF	0.060724	0.0719848	0.843567
ENOX2:NM_006375:chrX:-:43:153	Enox2:NM_001271447:chrX:-:20:109	uORF	0.334396	0.248369	1.34637
ENOX2:NM_182314:chrX:-:330:383	Enox2:NM_001271447:chrX:-:298:366	uORF	0.0635185	0.168277	0.377463
ENTPD5:NM_001249:chr14:-:101:160	Entpd5:NM_007647:chr12:-:78:146	overlap.uORF	0.313904	0.509778	0.615765
ENTPD7:NM_020354:chr10:+:99:149	Entpd7:NM_053103:chr19:+:232:282	uORF	0.0280332	0.869428	0.0322432
ENY2:NM_001193557:chr8:+:34:57	Eny2:NM_175009:chr15:+:14:37	uORF	0	0	NA
ENY2:NM_020189:chr8:+:117:146	Eny2:NM_175009:chr15:+:97:126	uORF	0	0	NA
EOGT:NM_173654:chr3:-:145:282	Eogt:NM_175313:chr6:-:244:288	uORF	0.154199	0.234444	0.657723
EOGT:NM_173654:chr3:-:255:341	Eogt:NM_175313:chr6:-:258:410	uORF	0.428314	0.483405	0.886035
EPN1:NM_001130072:chr19:+:118:201	Epn1:NM_001252454:chr7:+:98:232	uORF	0.285417	0.475669	0.600032
EPN2:NM_014964:chr17:+:281:325	Epn2:NM_001252189:chr11:-:13:168	uORF	0.166437	0.740239	0.224842
ERBB2:NM_004448:chr17:+:212:232	Erbb2:NM_001003817:chr11:+:153:173	uORF	0	0	NA
ERBB2IP:NM_001006600:chr5:+:184:219	Erbb2ip:NM_001005868:chr13:-:275:337	uORF	0.175302	0.581879	0.301269
ERBB2IP:NM_001006600:chr5:+:254:307	Erbb2ip:NM_001005868:chr13:-:342:395	uORF	0.0248979	0.375021	0.0663906
ERGIC2:NM_016570:chr12:-:67:108	Ergic2:NM_001286560:chr6:-:376:417	uORF	0.0668581	0.546239	0.122397
ERI3:NM_024066:chr1:-:41:169	Eri3:NM_001285899:chr4:+:13:159	uORF	0.156263	0.0505299	3.09249
ERRFI1:NM_018948:chr1:-:134:196	Errfi1:NM_133753:chr4:+:143:187	uORF	0.508576	0.430346	1.18178
ESCO1:NM_052911:chr18:-:276:377	Esco1:NM_001081222:chr18:-:362:460	uORF	0.11503	0.286724	0.40119
ESCO1:NM_052911:chr18:-:468:557	Esco1:NM_001081222:chr18:-:551:637	uORF	0.214419	0.327135	0.655447
ESRRA:NM_004451:chr11:+:133:168	Esrra:NM_007953:chr19:-:155:190	uORF	0.0870867	0.275464	0.316146
ETF1:NM_004730:chr5:-:96:203	Etf1:NM_144866:chr18:-:62:169	uORF	0	0	NA
ETFDH:NM_004453:chr4:+:97:174	Etfdh:NM_025794:chr3:-:0:92	uORF	0.234185	0.698669	0.335188
ETV1:NM_001163147:chr7:-:396:521	Etv1:NM_007960:chr12:+:105:230	uORF	0.0427322	0	NA
ETV1:NM_004956:chr7:-:396:497	Etv1:NM_007960:chr12:+:105:230	uORF	0.443166	0.523996	0.845742
ETV1:NM_004956:chr7:-:629:718	Etv1:NM_007960:chr12:+:105:230	uORF	0.148371	0.166021	0.89369
ETV4:NM_001079675:chr17:-:67:171	Etv4:NM_008815:chr11:-:19:123	uORF	0.0739588	0.141562	0.522447
ETV6:NM_001987:chr12:+:175:255	Etv6:NM_007961:chr6:+:336:380	uORF	0.032578	0	NA
EVI2A:NM_001003927:chr17:-:76:183	Evi2a-evi2b:NM_146023:chr11:-:77:220	uORF	0.356099	0.539154	0.660477
EXOC5:NM_006544:chr14:-:25:60	Exoc5:NM_207214:chr14:-:283:318	uORF	0	0.108895	0
EXT1:NM_000127:chr8:-:220:267	Ext1:NM_010162:chr15:-:272:319	uORF	0	0	NA
EXT1:NM_000127:chr8:-:477:590	Ext1:NM_010162:chr15:-:524:637	uORF	0.0355473	0.0860924	0.412898
EXTL2:NM_001033025:chr1:-:486:578	Extl2:NM_001163514:chr3:+:33:272	uORF	0.325395	0.487518	0.667451
EXTL2:NM_001261442:chr1:-:486:569	Extl2:NM_001163514:chr3:+:33:272	uORF	0.503223	0.441207	1.14056
EXTL3:NM_001440:chr8:+:201:251	Extl3:NM_018788:chr14:-:297:347	uORF	0.173267	0.963536	0.179824
EXTL3:NM_001440:chr8:+:241:435	Extl3:NM_018788:chr14:-:337:480	uORF	0.423811	0.807287	0.524981
EXTL3:NM_001440:chr8:+:76:123	Extl3:NM_018788:chr14:-:166:291	uORF	0.367752	0.524703	0.700877
EYA3:NM_001990:chr1:-:7:120	Eya3:NM_010166:chr4:+:4:315	overlap.uORF	0.333911	0.882345	0.378437
FAF1:NM_007051:chr1:-:110:256	Faf1:NM_007983:chr4:+:11:241	uORF	0.330603	0.218273	1.51463
FAM108A1:NM_001130111:chr19:-:127:258	Abhd17a:NM_145421:chr10:-:129:257	uORF	0.190772	0.218369	0.873623
FAM122B:NM_001166599:chrX:-:222:344	Fam122b:NM_001166365:chrX:-:224:358	uORF	0.652071	0.799144	0.815962
FAM126B:NM_173822:chr2:-:87:146	Fam126b:NM_172513:chr1:-:149:208	uORF	0.0238851	0.0725412	0.329263
FAM135A:NM_020819:chr6:+:207:383	Fam135a:NM_026604:chr1:-:192:350	uORF	0.284293	0.287683	0.988216
FAM13B:NM_001101800:chr5:-:372:419	Fam13b:NM_146084:chr18:-:335:382	uORF	0	0	NA
FAM149B1:NM_173348:chr10:+:62:106	Fam149b:NM_001024512:chr14:+:34:189	overlap.uORF	0.154341	0.383421	0.402537
FAM196B:NM_001129891:chr5:-:1223:1327	Fam196b:NM_001025382:chr11:+:882:980	uORF	0.347492	0.243045	1.42975
FAM196B:NM_001129891:chr5:-:738:875	Fam196b:NM_001025382:chr11:+:402:536	uORF	0.299498	0.319449	0.937545
FAM199X:NM_207318:chrX:+:54:239	Fam199x:NM_146261:chrX:+:60:236	uORF	0.563311	0.734109	0.767339
FAM208B:NM_017782:chr10:+:277:372	BC016423:NM_134063:chr13:-:258:341	uORF	0.495751	1.11241	0.445656
FAM20B:NM_014864:chr1:+:196:225	Fam20b:NM_145413:chr1:-:31:99	uORF	0.177978	0.109465	1.62588
FAM214B:NM_025182:chr9:-:121:270	Fam214b:NM_001253353:chr4:-:365:514	uORF	0.116504	0.217238	0.536298
FAM219A:NM_001184940:chr9:-:20:208	Fam219a:NM_001159583:chr4:-:1:192	uORF	0.255567	0.183345	1.39391
FAM220A:NM_001037163:chr7:-:201:407	Fam220a:NM_026050:chr5:+:243:449	uORF	0.0695362	0.282532	0.246118
FAM222B:NM_001077498:chr17:-:116:169	Fam222b:NM_145430:chr11:+:93:146	uORF	0.0773882	0.105067	0.736563
FAM222B:NM_018182:chr17:-:116:148	Fam222b:NM_145430:chr11:+:93:146	uORF	0.0676688	0.0771708	0.876871
FAM53C:NM_001135647:chr5:+:329:397	Fam53c:NM_175104:chr18:+:250:318	uORF	0.104803	0.070405	1.48858
FAM53C:NM_016605:chr5:+:139:372	Fam53c:NM_175104:chr18:+:250:318	uORF	0.104803	0.070405	1.48858
FAM63B:NM_001040450:chr15:+:132:179	Fam63b:NM_172772:chr9:-:58:105	uORF	0.249535	0.188078	1.32677
FAM81A:NM_152450:chr15:+:76:123	Fam81a:NM_029784:chr9:-:211:258	uORF	0.0943614	0.487085	0.193727
FAM84B:NM_174911:chr8:-:12:212	Fam84b:NM_001162926:chr15:-:154:267	uORF	0.20225	0.21447	0.943022
FAM84B:NM_174911:chr8:-:271:372	Fam84b:NM_001162926:chr15:-:407:493	uORF	0.2166	0.586512	0.369303
FAM84B:NM_174911:chr8:-:466:510	Fam84b:NM_001162926:chr15:-:600:644	uORF	0.236611	0.420275	0.562992
FAN1:NM_001146094:chr15:+:166:285	Fan1:NM_177893:chr7:-:189:275	uORF	0.53244	0	NA
FAN1:NM_001146095:chr15:+:6:182	Fan1:NM_177893:chr7:-:189:275	uORF	0.540631	0	NA
FASTKD2:NM_001136193:chr2:+:227:265	Fastkd2:NM_172422:chr1:+:27:95	uORF	0.233009	0.909544	0.256182
FBXL15:NM_024326:chr10:+:1130:1219	Fbxl15:NM_133694:chr19:+:104:178	uORF	0.327226	0.520405	0.628791
FBXL3:NM_012158:chr13:-:226:294	Fbxl3:NM_015822:chr14:-:195:263	uORF	0.181348	0.14106	1.28561
FBXO42:NM_018994:chr1:-:39:77	Fbxo42:NM_172518:chr4:+:96:134	uORF	0.172879	0.106258	1.62698
FBXO46:NM_001080469:chr19:-:27:92	Fbxo46:NM_175530:chr7:+:75:125	uORF	0.328248	1.03002	0.318682
FBXO8:NM_012180:chr4:-:737:763	Fbxo8:NM_015791:chr8:+:138:164	uORF	0	0.185516	0
FBXW2:NM_012164:chr9:-:114:221	Fbxw2:NM_001164770:chr2:-:69:197	uORF	0.071261	0.139373	0.511299
FEM1B:NM_015322:chr15:+:328:381	Fem1b:NM_010193:chr9:-:62:115	uORF	0.0895785	0.141898	0.631288
FEM1B:NM_015322:chr15:+:365:508	Fem1b:NM_010193:chr9:-:150:236	uORF	0.172085	0.126233	1.36323
FEM1C:NM_020177:chr5:-:242:313	Fem1c:NM_173423:chr18:-:232:300	uORF	0.112971	0.117955	0.957749
FGD1:NM_004463:chrX:-:493:606	Fgd1:NM_008001:chrX:+:273:377	uORF	0.0892374	0.104757	0.851853
FGD6:NM_018351:chr12:-:113:169	Fgd6:NM_053072:chr10:+:195:251	uORF	0.221825	0.280791	0.79
FGF7:NM_002009:chr15:+:127:174	Fgf7:NM_008008:chr2:+:57:104	uORF	0.0587069	0.244616	0.239996
FGFR1:NM_001174063:chr8:-:896:928	Fgfr1:NM_001079908:chr8:+:713:745	uORF	0.113533	0.288055	0.394134
FGFR1OP2:NM_001171887:chr12:+:154:225	Fgfr1op2:NM_026218:chr6:+:61:132	uORF	0.615115	0.50593	1.21581
FIZ1:NM_032836:chr19:-:32:55	Fiz1:NM_001110328:chr7:-:51:80	uORF	0.0665301	0	NA
FLI1:NM_001167681:chr11:+:302:433	Fli1:NM_008026:chr9:-:119:196	overlap.uORF	0.0179364	0	NA
FLRT2:NM_013231:chr14:+:243:275	Flrt2:NM_201518:chr12:+:251:283	uORF	0	0	NA
FLRT2:NM_013231:chr14:+:285:359	Flrt2:NM_201518:chr12:+:293:367	uORF	0.140124	0.277752	0.504492
FLRT2:NM_013231:chr14:+:356:595	Flrt2:NM_201518:chr12:+:400:564	uORF	0.639447	0.966209	0.66181
FMNL2:NM_052905:chr2:+:91:171	Fmnl2:NM_172409:chr2:+:28:108	uORF	0.162735	0.31521	0.516275
FNDC3A:NM_001079673:chr13:+:20:100	Fndc3a:NM_207636:chr14:-:15:95	uORF	0.0179588	0.0476784	0.376665
FNDC3A:NM_001079673:chr13:+:240:302	Fndc3a:NM_207636:chr14:-:92:322	uORF	0.272545	0.212086	1.28507
FOXJ2:NM_018416:chr12:+:781:969	Foxj2:NM_021899:chr6:+:506:538	uORF	0.0520474	0	NA
FOXO3:NM_201559:chr6:+:25:177	Foxo3:NM_019740:chr10:-:70:201	uORF	0.158682	0.190714	0.832041
FOXP1:NM_001012505:chr3:-:282:326	Foxp1:NM_053202:chr6:-:53:97	uORF	0.183093	0.0948591	1.93016
FOXP1:NM_001244816:chr3:-:73:231	Foxp1:NM_053202:chr6:-:53:97	uORF	0.183093	0.0948591	1.93016
FRK:NM_002031:chr6:-:17:274	Frk:NM_001159544:chr10:+:92:502	uORF	0.577031	0.464623	1.24193
FRMD6:NM_001042481:chr14:+:415:486	Frmd6:NM_028127:chr12:+:129:182	uORF	0.112257	0.243037	0.461893
FRS2:NM_001042555:chr12:+:311:424	Frs2:NM_177798:chr10:-:183:269	uORF	0.535234	0.811978	0.659173
FRS2:NM_001042555:chr12:+:436:495	Frs2:NM_177798:chr10:-:273:347	uORF	0.0691258	0.0918284	0.752772
FRS2:NM_006654:chr12:+:250:393	Frs2:NM_177798:chr10:-:183:269	uORF	0.765087	0.487163	1.57049
FRS2:NM_006654:chr12:+:372:431	Frs2:NM_177798:chr10:-:217:276	uORF	0.721724	1.95863	0.368485
FRYL:NM_015030:chr4:-:337:402	Fryl:NM_028194:chr5:-:319:384	uORF	0.0411506	0.171403	0.240081
FURIN:NM_002569:chr15:+:101:166	Furin:NM_001081454:chr7:-:157:222	uORF	0.14569	0.0587828	2.47844
FUT10:NM_032664:chr8:-:209:298	Fut10:NM_001012517:chr8:+:195:329	uORF	0.281842	0.537049	0.524798
FUZ:NM_001171937:chr19:-:104:181	Fuz:NM_027376:chr7:+:69:353	overlap.uORF	0.354726	0.264968	1.33875
FYCO1:NM_024513:chr3:-:20:121	Fyco1:NM_001110253:chr9:-:93:137	uORF	0.106384	0.0903094	1.178
FZD3:NM_017412:chr8:+:223:252	Fzd3:NM_021458:chr14:-:168:197	uORF	0.0470767	0.228102	0.206385
FZD3:NM_017412:chr8:+:263:382	Fzd3:NM_021458:chr14:-:208:327	uORF	0.10356	0.244603	0.423378
GABPA:NM_002040:chr21:+:329:574	Gabpa:NM_008065:chr16:+:4:453	overlap.uORF	0.312466	0.446169	0.700331
GABPB1:NM_002041:chr15:-:217:330	Gabpb1:NM_001271467:chr2:-:38:301	uORF	0.225127	0.308537	0.729661
GABPB2:NM_144618:chr1:+:64:237	Gabpb2:NM_029885:chr3:-:94:222	uORF	0.293599	0.415781	0.706139
GALNT11:NM_022087:chr7:+:140:199	Galnt11:NM_144908:chr5:+:87:146	uORF	0.334989	0.291055	1.15095
GALNT1:NM_020474:chr18:+:10:69	Galnt1:NM_001160404:chr18:+:161:235	uORF	0.11167	0.270424	0.412944
GALNT3:NM_004482:chr2:-:167:319	Galnt3:NM_015736:chr2:-:15:314	uORF	0.450055	0.925302	0.486387
GALNT3:NM_004482:chr2:-:208:291	Galnt3:NM_015736:chr2:-:250:327	uORF	0.0960266	0.313245	0.306554
GALNTL4:NM_198516:chr11:-:64:150	Galnt18:NM_173739:chr7:-:74:142	uORF	0.273482	0.44084	0.620366
GAPVD1:NM_015635:chr9:+:79:141	Gapvd1:NM_025709:chr2:-:440:649	overlap.uORF	0.436757	0.709951	0.615192
GAS2L1:NM_006478:chr22:+:118:141	Gas2l1:NM_001190406:chr11:-:84:107	uORF	0	0.436093	0
GAS6:NM_000820:chr13:-:73:132	Gas6:NM_019521:chr8:-:93:152	uORF	0.144443	0.325297	0.444036
GBA2:NM_020944:chr9:-:270:443	Gba2:NM_172692:chr4:-:253:333	uORF	0.321075	0.366467	0.876135
GFOD1:NM_001242629:chr6:-:312:440	Gfod1:NM_001033399:chr13:-:288:359	uORF	0.127768	0.189365	0.674719
GFOD2:NM_001243650:chr16:-:134:220	Gfod2:NM_027469:chr8:-:110:166	uORF	0.134582	0.515303	0.261171
GFOD2:NM_001243650:chr16:-:213:272	Gfod2:NM_027469:chr8:-:147:218	uORF	0.314654	0.921814	0.341342
GFRA1:NM_001145453:chr10:-:236:295	Gfra1:NM_001285457:chr19:-:117:176	uORF	0.149891	0.280016	0.535295
GGA1:NM_001001560:chr22:+:28:156	Gga1:NM_145929:chr15:+:48:302	uORF	0.513074	0.421841	1.21627
GLT8D1:NM_001010983:chr3:-:192:326	Glt8d1:NM_029626:chr14:+:42:500	uORF	0.488007	0.572981	0.851698
GLTSCR1:NM_015711:chr19:+:87:137	Gltscr1:NM_001081418:chr7:-:1:51	uORF	0.0946055	0.61831	0.153007
GMCL1:NM_178439:chr2:+:53:112	Gmcl1:NM_011818:chr6:-:96:155	uORF	0.270864	0.481568	0.562463
GNAZ:NM_002073:chr22:+:100:267	Gnaz:NM_010311:chr10:+:230:394	uORF	0.339927	0.400133	0.849535
GNAZ:NM_002073:chr22:+:264:317	Gnaz:NM_010311:chr10:+:391:444	uORF	0.0261928	0.43342	0.0604328
GNPAT:NM_014236:chr1:+:53:166	Gnpat:NM_010322:chr8:+:52:165	uORF	0.29686	0.58877	0.504203
GOLGA3:NM_001172557:chr12:-:43:78	Golga3:NM_008146:chr5:+:231:260	uORF	0.105436	1.20708	0.0873485
GOLGA7:NM_001002296:chr8:+:8:148	Golga7:NM_020585:chr8:-:147:248	uORF	0.285938	0.547443	0.522316
GOLIM4:NM_014498:chr3:-:70:186	Golim4:NM_175193:chr3:-:254:370	uORF	0.278405	0.453848	0.613433
GOLPH3:NM_022130:chr5:-:135:188	Golph3:NM_025673:chr15:+:95:148	uORF	0.312228	0.309498	1.00882
GPATCH2:NM_018040:chr1:-:3:65	Gpatch2:NM_026367:chr1:+:20:82	uORF	0.264929	0.23362	1.13402
GPATCH4:NM_015590:chr1:-:20:76	Gpatch4:NM_001110809:chr3:+:15:71	uORF	0.306596	0.796683	0.38484
GPBP1:NM_001127235:chr5:+:469:531	Gpbp1:NM_001122963:chr13:-:794:856	uORF	0.133844	0	NA
GPBP1:NM_001127235:chr5:+:533:571	Gpbp1:NM_001122963:chr13:-:858:896	uORF	0.238122	0	NA
GPBP1:NM_001127235:chr5:+:816:902	Gpbp1:NM_001122963:chr13:-:1136:1342	overlap.uORF	0.0815188	0	NA
GPBP1:NM_001203246:chr5:+:1156:1233	Gpbp1:NM_001122963:chr13:-:1136:1342	overlap.uORF	0.368971	0.38416	0.960461
GPBP1L1:NM_021639:chr1:-:941:991	Gpbp1l1:NM_029868:chr4:+:756:812	uORF	0.173973	0.632906	0.27488
GPC6:NM_005708:chr13:+:280:453	Gpc6:NM_001079844:chr14:+:309:458	uORF	0.762613	0.812407	0.938708
GPR85:NM_001146265:chr7:-:363:581	Gpr85:NM_145066:chr6:-:914:1075	uORF	0.31498	0.275876	1.14175
GPRASP2:NM_001004051:chrX:+:451:561	Gprasp2:NM_001163015:chrX:+:315:611	uORF	0.767983	0.884995	0.867782
GPSM2:NM_013296:chr1:+:282:347	Gpsm2:NM_029522:chr3:-:331:357	uORF	0	0	NA
GRB2:NM_002086:chr17:-:287:337	Grb2:NM_008163:chr11:-:29:382	overlap.uORF	0.274866	1.75635	0.156498
GSK3B:NM_001146156:chr3:-:241:348	Gsk3b:NM_019827:chr16:+:789:902	uORF	0.0550085	0.0345866	1.59045
GSK3B:NM_001146156:chr3:-:760:789	Gsk3b:NM_019827:chr16:+:1296:1325	uORF	0.106373	0	NA
GTF2H1:NM_001142307:chr11:+:125:400	Gtf2h1:NM_008186:chr7:+:39:122	uORF	0.147223	0.283934	0.51851
HCFC1:NM_005334:chrX:-:381:416	Hcfc1:NM_008224:chrX:-:169:204	uORF	0	0.129323	0
HDAC5:NM_001015053:chr17:-:3:164	Hdac5:NM_001077696:chr11:-:28:189	uORF	0.0258817	0.0247487	1.04578
HDGFRP3:NM_016073:chr15:-:143:301	Hdgfrp3:NM_013886:chr7:-:6:137	uORF	0.191243	0.238879	0.800587
HDLBP:NM_005336:chr2:-:174:218	Hdlbp:NM_133808:chr1:-:139:171	uORF	0.311558	0.0618119	5.04041
HDLBP:NM_005336:chr2:-:55:96	Hdlbp:NM_133808:chr1:-:20:61	uORF	0.0719151	0	NA
HECTD1:NM_015382:chr14:-:53:211	Hectd1:NM_144788:chr12:-:291:350	uORF	0.264244	0.802695	0.329196
HERC4:NM_015601:chr10:-:225:302	Herc4:NM_026101:chr10:+:390:512	overlap.uORF	0.108541	0.221786	0.489397
HERPUD2:NM_022373:chr7:-:502:555	Herpud2:NM_020586:chr9:-:676:729	uORF	0.171686	1.70011	0.100985
HEXDC:NM_173620:chr17:+:85:414	Hexdc:NM_001001333:chr11:+:18:188	uORF	0.452236	0.577726	0.782786
HEXIM1:NM_006460:chr17:+:1646:1684	Hexim1:NM_138753:chr11:+:405:461	uORF	0.238561	0.950169	0.251072
HIPK3:NM_001048200:chr11:+:113:139	Hipk3:NM_001145824:chr2:-:387:413	uORF	0	0.185516	0
HIPK3:NM_001048200:chr11:+:12:167	Hipk3:NM_001145824:chr2:-:292:441	uORF	0.0475174	0.05397	0.880441
HIRA:NM_003325:chr22:-:1:93	Hira:NM_010435:chr16:+:524:616	uORF	0.066981	0.117541	0.569851
HIVEP2:NM_006734:chr6:-:13:159	Hivep2:NM_010437:chr10:+:196:375	uORF	0.633945	0.884793	0.716489
HIVEP2:NM_006734:chr6:-:283:402	Hivep2:NM_010437:chr10:+:438:512	uORF	0.184491	0.282936	0.652061
HMBOX1:NM_001135726:chr8:+:13:54	Hmbox1:NM_177338:chr14:-:3:44	uORF	0	0	NA
HMBOX1:NM_001135726:chr8:+:286:324	Hmbox1:NM_177338:chr14:-:272:310	uORF	0.149995	1.24917	0.120075
HMGA1:NM_145901:chr6:+:91:141	Hmga1:NM_001166535:chr17:+:72:215	overlap.uORF	0.291422	0.340106	0.856858
HMGA2:NM_003483:chr12:+:165:434	Hmga2:NM_010441:chr10:-:9:695	uORF	0.36301	0.560051	0.648173
HMGA2:NM_003483:chr12:+:743:793	Hmga2:NM_010441:chr10:-:786:842	uORF	0.152414	0.183295	0.831522
HMGB1:NM_002128:chr13:-:9:146	Hmgb1:NM_010439:chr5:-:64:171	overlap.uORF	0.0210101	0.103252	0.203483
HNRNPA0:NM_006805:chr5:-:171:224	Hnrnpa0:NM_029872:chr13:-:135:185	uORF	0.293169	0.927362	0.316132
HNRNPA0:NM_006805:chr5:-:20:82	Hnrnpa0:NM_029872:chr13:-:33:185	uORF	0.175986	0.462321	0.380656
HNRNPD:NM_001003810:chr4:-:113:286	Hnrnpd:NM_001077265:chr5:-:9:371	overlap.uORF	0.311357	0.389803	0.798753
HNRNPD:NM_001003810:chr4:-:19:90	Hnrnpd:NM_001077265:chr5:-:9:371	overlap.uORF	0.195205	0.0859941	2.26998
HNRNPF:NM_001098204:chr10:-:133:171	Hnrnpf:NM_001166427:chr6:+:191:229	uORF	0.12046	0	NA
HOMER1:NM_004272:chr5:-:378:467	Homer1:NM_001284189:chr13:+:108:197	uORF	0.187771	0.163774	1.14652
HOMER1:NM_004272:chr5:-:748:792	Homer1:NM_001284189:chr13:+:476:511	uORF	0.123227	0.169254	0.728061
HOMER1:NM_004272:chr5:-:887:955	Homer1:NM_001284189:chr13:+:601:660	uORF	0.232946	0.438138	0.531673
HOXA11:NM_005523:chr7:-:29:64	Hoxa11:NM_010450:chr6:-:51:86	uORF	0	0	NA
HOXA1:NM_005522:chr7:-:28:90	Hoxa1:NM_010449:chr6:-:30:92	uORF	0.0928966	0.247734	0.374985
HP1BP3:NM_016287:chr1:-:41:88	Hp1bp3:NM_001122897:chr4:+:76:246	uORF	0.347846	0.274733	1.26612
HPS5:NM_007216:chr11:-:110:241	Hps5:NM_001005247:chr7:-:137:358	uORF	0.571511	1.22534	0.466411
HPS5:NM_181507:chr11:-:110:232	Hps5:NM_001005247:chr7:-:137:358	uORF	0.533848	1.59951	0.333757
HR:NM_005144:chr8:-:344:448	Hr:NM_021877:chr14:+:401:505	uORF	0.0137739	0.198019	0.0695584
HR:NM_005144:chr8:-:58:108	Hr:NM_021877:chr14:+:115:165	uORF	0.029579	0.0778639	0.37988
HS3ST1:NM_005114:chr4:-:155:217	Hs3st1:NM_010474:chr5:-:155:217	uORF	0.334715	0.141039	2.37321
HSF1:NM_005526:chr8:+:25:111	Hsf1:NM_008296:chr15:+:13:96	uORF	0.136747	0.289217	0.472817
HSPA4:NM_002154:chr5:+:102:272	Hspa4:NM_008300:chr11:-:26:304	uORF	0.754635	0.888569	0.84927
HTATIP2:NM_001098522:chr11:+:9:59	Htatip2:NM_001146049:chr7:+:108:224	uORF	0.303867	0.420559	0.72253
HTT:NM_002111:chr4:+:20:85	Htt:NM_010414:chr5:+:35:100	uORF	0.251345	0.398452	0.630804
HUWE1:NM_031407:chrX:-:376:408	Huwe1:NM_021523:chrX:+:403:435	uORF	0.0412991	0.22658	0.182272
IBTK:NM_015525:chr6:-:104:163	Ibtk:NM_001081282:chr9:-:138:197	uORF	0.35705	0.585738	0.609574
ICK:NM_014920:chr6:-:230:349	Ick:NM_001163780:chr9:+:313:432	uORF	0.0445504	0.359285	0.123997
IFRD1:NM_001007245:chr7:+:349:426	Ifrd1:NM_013562:chr12:-:31:189	uORF	0.0749506	0.0548075	1.36752
IFRD1:NM_001550:chr7:+:59:217	Ifrd1:NM_013562:chr12:-:31:189	uORF	0.0925693	0.258434	0.358193
IFT20:NM_001267774:chr17:-:157:213	Ift20:NM_018854:chr11:+:33:242	uORF	0.519279	0.651369	0.797213
IFT20:NM_001267774:chr17:-:60:254	Ift20:NM_018854:chr11:+:33:242	uORF	0.727933	0.96828	0.751779
IFT80:NM_001190241:chr3:-:326:385	Ift80:NM_026641:chr3:-:57:137	uORF	0.218343	0.353473	0.617708
IGFBP5:NM_000599:chr2:-:397:561	Igfbp5:NM_010518:chr1:-:411:539	uORF	0.44941	0.660426	0.680486
IGSF3:NM_001007237:chr1:-:179:295	Igsf3:NM_207205:chr3:+:183:299	uORF	0.27159	0.221354	1.22695
IKBKE:NM_001193321:chr1:+:451:522	Ikbke:NM_019777:chr1:-:228:299	uORF	0.126404	0.0597183	2.11667
IKZF5:NM_022466:chr10:-:9:131	Ikzf5:NM_175115:chr7:-:29:97	uORF	0.324335	0.20637	1.57161
IL15:NM_000585:chr4:+:147:218	Il15:NM_001254747:chr8:-:302:352	uORF	0.300203	0.499311	0.601234
IL20RB:NM_144717:chr3:+:180:239	Il20rb:NM_001033543:chr9:-:48:107	uORF	0.396103	0.467133	0.847945
ILF3:NM_001137673:chr19:+:174:269	Ilf3:NM_001042707:chr9:+:127:279	uORF	0.291288	0.19863	1.46649
ING1:NM_198219:chr13:+:407:625	Ing1:NM_011919:chr8:+:388:705	uORF	0.307387	0.315742	0.973538
INHBA:NM_002192:chr7:-:32:115	Inhba:NM_008380:chr13:+:16:69	uORF	0.171309	0.309717	0.553117
INTS3:NM_023015:chr1:+:356:517	Ints3:NM_145540:chr3:-:593:640	uORF	0.341349	0.432003	0.790153
INTS6:NM_001039938:chr13:-:257:529	Ints6:NM_008715:chr14:-:18:680	overlap.uORF	0.326693	0.425246	0.768246
IP6K1:NM_001006115:chr3:-:123:152	Ip6k1:NM_013785:chr9:+:15:203	uORF	0	0	NA
IP6K1:NM_153273:chr3:-:159:215	Ip6k1:NM_013785:chr9:+:15:203	uORF	0.153793	1.15123	0.133591
IRF2:NM_002199:chr4:-:44:190	Irf2:NM_008391:chr8:+:37:246	overlap.uORF	0.104966	0.101358	1.0356
IRF2BPL:NM_024496:chr14:-:102:149	Irf2bpl:NM_145836:chr12:-:119:166	uORF	0.0651618	0.081461	0.799914
IRF2BPL:NM_024496:chr14:-:204:467	Irf2bpl:NM_145836:chr12:-:130:573	uORF	0.677287	0.818913	0.827056
IRX2:NM_001134222:chr5:-:177:215	Irx2:NM_010574:chr13:+:19:57	uORF	0.0806656	0.109096	0.7394
IRX3:NM_024336:chr16:-:159:212	Irx3:NM_001253822:chr8:-:168:221	uORF	0.0276673	0.0740313	0.373724
ITCH:NM_001257137:chr20:+:120:170	Itch:NM_001243712:chr2:+:110:160	uORF	0.0821893	0.248274	0.331042
ITGB5:NM_002213:chr3:-:130:168	Itgb5:NM_001145884:chr16:+:161:205	uORF	0	0.324597	0
ITGB8:NM_002214:chr7:+:333:518	Itgb8:NM_177290:chr12:-:74:379	uORF	0.616893	0.719377	0.857538
IVNS1ABP:NM_006469:chr1:-:344:418	Ivns1abp:NM_001039511:chr1:+:225:299	uORF	0.0707401	0.176041	0.401838
JAG1:NM_000214:chr20:-:195:407	Jag1:NM_013822:chr2:-:71:109	uORF	0	0.257614	0
JMJD1C:NM_004241:chr10:-:365:421	Jmjd1c:NM_001242396:chr10:+:352:408	uORF	0.0506413	0	NA
JMJD1C:NM_004241:chr10:-:90:182	Jmjd1c:NM_001242396:chr10:+:78:170	uORF	0.0439424	0	NA
JMY:NM_152405:chr5:+:141:320	Jmy:NM_021310:chr13:-:117:323	uORF	0.613638	0.605889	1.01279
JOSD1:NM_014876:chr22:-:50:100	Josd1:NM_028792:chr15:-:511:561	uORF	0.149952	0.203706	0.736119
JPH2:NM_020433:chr20:-:524:685	Jph2:NM_001205076:chr2:-:12:188	uORF	0.61355	0.89226	0.687636
JUN:NM_002228:chr1:-:847:918	Jun:NM_010591:chr4:-:602:829	uORF	0.228207	0.327687	0.696417
KAT6A:NM_001099412:chr8:-:12:101	Kat6a:NM_001081149:chr8:+:19:108	uORF	0.086468	0.0818995	1.05578
KAT6A:NM_001099412:chr8:-:436:513	Kat6a:NM_001081149:chr8:+:386:463	uORF	0.0523349	0	NA
KAT6A:NM_006766:chr8:-:12:92	Kat6a:NM_001081149:chr8:+:19:108	uORF	0.126507	0.172685	0.732585
KATNB1:NM_005886:chr16:+:256:282	Katnb1:NM_028805:chr8:+:244:270	uORF	0	0.185516	0
KATNB1:NM_005886:chr16:+:47:118	Katnb1:NM_028805:chr8:+:43:114	uORF	0.152235	0.0570812	2.66699
KCMF1:NM_020122:chr2:+:296:337	Kcmf1:NM_019715:chr6:-:290:343	uORF	0.297716	0.112243	2.65243
KCTD11:NM_001002914:chr17:+:349:660	Kctd11:NM_153143:chr11:-:252:338	uORF	0.669913	0.649135	1.03201
KCTD11:NM_001002914:chr17:+:503:637	Kctd11:NM_153143:chr11:-:328:360	uORF	0.0505551	0.11284	0.448023
KDM2A:NM_012308:chr11:+:18:53	Kdm2a:NM_001001984:chr19:-:21:56	uORF	0.0441304	0	NA
KDM2A:NM_012308:chr11:+:663:800	Kdm2a:NM_001001984:chr19:-:654:836	overlap.uORF	0.426962	0.554082	0.770576
KDM2A:NM_012308:chr11:+:730:843	Kdm2a:NM_001001984:chr19:-:695:1018	overlap.uORF	0.215744	0.13432	1.6062
KIAA0040:NM_001162893:chr1:-:575:655	4930523C07Rik:NM_001162896:chr1:+:492:569	uORF	0.43463	0.711955	0.610474
KIAA0100:NM_014680:chr17:-:61:102	2610507B11Rik:NM_001002004:chr11:+:54:95	uORF	0.0786643	0	NA
KIAA0195:NM_014738:chr17:+:77:112	2310067B10Rik:NM_028014:chr11:+:28:63	uORF	0.0427542	0.26576	0.160875
KIAA0196:NM_014846:chr8:-:213:275	E430025E21Rik:NM_153548:chr15:-:120:182	uORF	0.398176	0.617882	0.644421
KIAA0232:NM_001100590:chr4:+:270:374	D5Ertd579e:NM_001081232:chr5:-:394:426	uORF	0.0899461	0.403872	0.22271
KIAA0317:NM_001039479:chr14:-:229:324	Arel1:NM_178065:chr12:-:327:455	uORF	0.709091	1.06329	0.666883
KIAA0317:NM_001039479:chr14:-:442:471	Arel1:NM_178065:chr12:-:569:598	uORF	0	0.370874	0
KIAA0319L:NM_024874:chr1:-:167:223	AU040320:NM_001035526:chr4:+:163:219	uORF	0.0998499	0.0949367	1.05175
KIAA0355:NM_014686:chr19:+:717:788	4931406P16Rik:NM_172741:chr7:-:255:338	uORF	0	0.0774427	0
KIAA0391:NM_001256678:chr14:+:282:476	1110008L16Rik:NM_025373:chr12:+:952:1077	uORF	0.751895	0.903813	0.831914
KIAA0528:NM_014802:chr12:-:63:155	C2cd5:NM_001109688:chr6:-:84:176	uORF	0.443756	0.896429	0.495026
KIAA0754:NM_015038:chr1:+:115:246	D830031N03Rik:NM_001167918:chr4:-:534:647	uORF	0.0342787	0.0480927	0.712765
KIAA0754:NM_015038:chr1:+:536:664	D830031N03Rik:NM_001167918:chr4:-:976:1107	uORF	0.424294	0.430248	0.98616
KIAA1191:NM_001079684:chr5:-:214:291	4833439L19Rik:NM_001252645:chr13:-:210:287	uORF	0.130858	0.288447	0.453664
KIAA1191:NM_001079684:chr5:-:96:158	4833439L19Rik:NM_001252645:chr13:-:103:165	uORF	0.369357	0.675253	0.546991
KIAA1715:NM_030650:chr2:-:154:189	Lnp:NM_001110209:chr2:-:153:188	uORF	0.0377155	0.460343	0.0819292
KIF1C:NM_006612:chr17:+:256:333	Kif1c:NM_153103:chr11:+:268:345	uORF	0.0573396	0.103678	0.553057
KIF3B:NM_004798:chr20:+:30:122	Kif3b:NM_008444:chr2:+:37:96	uORF	0.138791	0.194146	0.714877
KIF3C:NM_002254:chr2:-:98:190	Kif3c:NM_008445:chr12:+:330:368	uORF	0.0740653	0.555898	0.133235
KIRREL3:NM_001161707:chr11:-:105:161	Kirrel3:NM_001190911:chr9:+:102:158	uORF	0.0553821	0.292009	0.189659
KIRREL3:NM_001161707:chr11:-:247:315	Kirrel3:NM_001190911:chr9:+:251:319	uORF	0.171204	0.777791	0.220116
KLF13:NM_015995:chr15:+:115:177	Klf13:NM_021366:chr7:-:179:214	uORF	0.167193	0.317983	0.525793
KLF4:NM_004235:chr9:-:146:328	Klf4:NM_010637:chr4:-:144:323	uORF	0.209784	0.289108	0.725624
KLF9:NM_001206:chr9:-:1075:1107	Klf9:NM_010638:chr19:+:324:356	uORF	0.0511497	0	NA
KLHDC10:NM_014997:chr7:+:36:128	Klhdc10:NM_029742:chr6:+:1:78	uORF	0.646432	0.833812	0.775273
KLHDC8B:NM_173546:chr3:+:77:199	Klhdc8b:NM_030075:chr9:-:1157:1198	uORF	0.153182	0.229128	0.668543
KLHL24:NM_017644:chr3:+:223:279	Klhl24:NM_029436:chr16:+:170:226	uORF	0.125065	0.355556	0.351746
LARP4B:NM_015155:chr10:-:15:59	Larp4b:NM_172585:chr13:+:17:61	uORF	0	0.188486	0
LATS2:NM_014572:chr13:-:256:339	Lats2:NM_015771:chr14:-:240:335	uORF	0.115175	0.547734	0.210275
LDB1:NM_003893:chr10:-:238:459	Ldb1:NM_010697:chr19:-:398:466	uORF	0.114288	0.179068	0.638237
LDB1:NM_003893:chr10:-:417:467	Ldb1:NM_010697:chr19:-:367:474	uORF	0.122455	0.178419	0.686336
LGR4:NM_018490:chr11:-:276:341	Lgr4:NM_172671:chr2:+:251:316	uORF	0.0901778	0.40684	0.221654
LHFP:NM_005780:chr13:-:257:352	Lhfp:NM_175386:chr3:+:53:259	uORF	0.454147	0.888049	0.511399
LHX9:NM_020204:chr1:+:116:235	Lhx9:NM_001025565:chr1:-:24:443	uORF	0.837145	1.42911	0.585779
LIMA1:NM_001113547:chr12:-:163:219	Lima1:NM_023063:chr15:-:134:190	uORF	0.137836	0.292613	0.471051
LIMK2:NM_001031801:chr22:+:144:224	Limk2:NM_173053:chr11:-:167:244	uORF	0.271709	0.197474	1.37592
LIN54:NM_001115008:chr4:-:89:124	Lin54:NM_001115010:chr5:-:18:53	uORF	0.0403798	0	NA
LMBRD2:NM_001007527:chr5:-:106:222	Lmbrd2:NM_177178:chr15:+:99:227	uORF	0.703551	0.867242	0.811251
LOX:NM_002317:chr5:-:123:305	Lox:NM_010728:chr18:-:247:456	uORF	0.499711	0.711988	0.701854
LOXL1:NM_005576:chr15:+:166:222	Loxl1:NM_010729:chr9:-:167:223	uORF	0.0249433	0	NA
LOXL1:NM_005576:chr15:+:97:150	Loxl1:NM_010729:chr9:-:98:151	uORF	0.0607294	0	NA
LPAR2:NM_004720:chr19:-:73:126	Lpar2:NM_020028:chr8:+:81:134	uORF	0.229947	1.31651	0.174665
LPAR5:NM_001142961:chr12:-:147:212	Lpar5:NM_001163268:chr6:+:206:271	uORF	0.349555	0.51903	0.673478
LPAR6:NM_001162497:chr13:-:477:656	Lpar6:NM_175116:chr14:+:84:437	uORF	0.681855	1.11784	0.609973
LPPR2:NM_001170635:chr19:+:265:348	BC018242:NM_144935:chr9:+:191:277	uORF	0.289541	1.01936	0.284041
LPXN:NM_004811:chr11:-:90:140	Lpxn:NM_134152:chr19:+:3:53	uORF	0.352503	0.872363	0.404078
LRBA:NM_001199282:chr4:-:160:282	Lrba:NM_001077687:chr3:+:202:282	uORF	0.206503	0.10967	1.88294
LRBA:NM_001199282:chr4:-:200:277	Lrba:NM_001077687:chr3:+:68:277	uORF	0.245003	0.193545	1.26587
LRIF1:NM_001006945:chr1:-:256:324	Lrif1:NM_001286685:chr3:+:363:1982	uORF	0.326138	0.626003	0.520986
LRP6:NM_002336:chr12:-:31:117	Lrp6:NM_008514:chr6:-:106:183	uORF	0.170647	0.262371	0.650404
LRRC8A:NM_001127244:chr9:+:421:498	Lrrc8a:NM_177725:chr2:+:53:130	uORF	0.17832	0.496732	0.358986
LRRC8B:NM_001134476:chr1:+:384:446	Lrrc8b:NM_001033550:chr5:+:194:256	uORF	0.0427096	0.309634	0.137936
LRRC8D:NM_001134479:chr1:+:39:245	Lrrc8d:NM_001122768:chr5:+:63:251	uORF	0.0310346	0.210756	0.147253
LRRC8D:NM_001134479:chr1:+:47:298	Lrrc8d:NM_001122768:chr5:+:89:130	uORF	0.0405504	0	NA
LRRC8D:NM_018103:chr1:+:229:285	Lrrc8d:NM_178701:chr5:+:189:290	uORF	0.179486	0.102776	1.74637
LURAP1L:NM_203403:chr9:+:200:253	Lurap1l:NM_026821:chr4:+:212:259	uORF	0.188044	0.715111	0.262958
LUZP1:NM_001142546:chr1:-:203:253	Luzp1:NM_024452:chr4:+:292:339	uORF	0.0561868	0.514805	0.109142
LUZP6:NM_001128619:chr7:-:267:356	Mtpn:NM_008098:chr6:-:195:308	overlap.uORF	0.73493	0.460731	1.59514
LYAR:NM_017816:chr4:-:68:130	Lyar:NM_025281:chr5:+:8:196	uORF	0.273021	0.378964	0.72044
M6PR:NM_001207024:chr12:-:32:244	M6pr:NM_010749:chr6:+:26:127	uORF	0.297253	1.21484	0.244684
MAB21L1:NM_005584:chr13:-:111:134	Mab21l1:NM_010750:chr3:+:101:124	uORF	0	0.661563	0
MADD:NM_001135943:chr11:+:101:181	Madd:NM_001177719:chr2:-:126:302	uORF	0.43813	0.626975	0.6988
MAF1:NM_032272:chr8:+:223:345	Maf1:NM_001164607:chr15:+:148:270	uORF	0.0529915	0.155484	0.340817
MAN1A2:NM_006699:chr1:+:387:443	Man1a2:NM_010763:chr3:-:247:309	uORF	0.239859	0.04079	5.88032
MANSC1:NM_018050:chr12:-:122:190	Mansc1:NM_026345:chr6:-:222:311	uORF	0.676726	1.52263	0.444446
MAP3K11:NM_002419:chr11:-:84:281	Map3k11:NM_022012:chr19:+:474:518	uORF	0.0719113	0.280135	0.256702
MAP3K2:NM_006609:chr2:-:45:71	Map3k2:NM_011946:chr18:+:473:499	uORF	0	0.244067	0
MAP7D1:NM_018067:chr1:+:132:185	Map7d1:NM_001145970:chr4:-:168:221	uORF	0.0924245	0.29282	0.315635
MAPK6:NM_002748:chr15:+:179:232	Mapk6:NM_027418:chr9:-:150:227	uORF	0	0.116855	0
MAPK6:NM_002748:chr15:+:346:393	Mapk6:NM_015806:chr9:-:325:369	uORF	0	0	NA
MAPK6:NM_002748:chr15:+:37:177	Mapk6:NM_015806:chr9:-:28:168	uORF	0.0410381	0.113945	0.360156
MAPK6:NM_002748:chr15:+:557:604	Mapk6:NM_015806:chr9:-:536:583	uORF	0.0561951	0.301326	0.186492
MAPK6:NM_002748:chr15:+:650:709	Mapk6:NM_015806:chr9:-:629:685	uORF	0.141244	0.400529	0.352643
MAPK6:NM_002748:chr15:+:726:764	Mapk6:NM_015806:chr9:-:701:742	uORF	0.076972	0	NA
MAPKAPK5:NM_003668:chr12:+:8:76	Mapkapk5:NM_010765:chr5:-:432:524	uORF	0.117811	0.301525	0.390716
MARCH3:NM_178450:chr5:-:294:431	March3:NM_177115:chr18:-:136:258	uORF	0.619707	0.670617	0.924085
MARCH4:NM_020814:chr2:-:428:691	March4:NM_001045533:chr1:-:161:424	uORF	0.132909	0.215943	0.615485
MARCH8:NM_001002265:chr10:-:775:816	March8:NM_027920:chr6:+:378:419	uORF	0.108087	0.256831	0.420848
MARCKS:NM_002356:chr6:+:169:384	Marcks:NM_008538:chr10:-:60:380	uORF	0.164525	0.245292	0.670732
MARK2:NM_001039469:chr11:+:144:260	Mark2:NM_001080388:chr19:-:200:316	uORF	0.0769049	0	NA
MARK2:NM_017490:chr11:+:410:469	Mark2:NM_001080390:chr19:-:370:429	uORF	0.116144	0.0336889	3.44754
MARK2:NM_017490:chr11:+:52:255	Mark2:NM_001080390:chr19:-:64:189	uORF	0.258634	0.558164	0.463365
MARK3:NM_001128918:chr14:+:182:298	Mark3:NM_021516:chr12:+:134:250	uORF	0.249793	0.282536	0.884111
MARK3:NM_001128918:chr14:+:362:523	Mark3:NM_021516:chr12:+:377:427	uORF	0.127485	0.159989	0.796833
MATR3:NM_001194954:chr5:+:450:611	Matr3:NM_010771:chr18:+:42:227	uORF	0.385022	0.431921	0.891418
MATR3:NM_001194954:chr5:+:577:606	Matr3:NM_010771:chr18:+:193:222	uORF	0	0	NA
MATR3:NM_001194955:chr5:+:231:371	Matr3:NM_010771:chr18:+:42:227	uORF	0.231458	0.33487	0.691187
MATR3:NM_018834:chr5:+:54:254	Matr3:NM_010771:chr18:+:23:211	uORF	0.617878	0.7881	0.784009
MBNL1:NM_021038:chr3:+:1491:1628	Mbnl1:NM_001253708:chr3:+:606:734	uORF	0.606711	0.929862	0.652474
MBNL2:NM_144778:chr13:+:147:230	Mbnl2:NM_175341:chr14:+:148:231	uORF	0.120964	0.117845	1.02647
MBNL2:NM_144778:chr13:+:596:661	Mbnl2:NM_175341:chr14:+:435:500	uORF	0.354255	0.515303	0.687469
MBTPS1:NM_003791:chr16:-:102:161	Mbtps1:NM_001167910:chr8:-:39:104	uORF	0.19555	0.133677	1.46285
MBTPS1:NM_003791:chr16:-:234:269	Mbtps1:NM_001167910:chr8:-:171:206	uORF	0.173371	0.613622	0.282537
MBTPS1:NM_003791:chr16:-:312:386	Mbtps1:NM_001167910:chr8:-:203:322	uORF	0.300645	0.316847	0.948866
MCFD2:NM_001171506:chr2:-:95:172	Mcfd2:NM_139295:chr17:-:62:211	overlap.uORF	0.529182	1.25698	0.420995
MECOM:NM_001105077:chr3:-:179:268	Mecom:NM_007963:chr3:-:757:789	uORF	0	0	NA
MECP2:NM_004992:chrX:-:66:170	Mecp2:NM_010788:chrX:-:7:126	uORF	0	0.0376638	0
MED1:NM_004774:chr17:-:29:82	Med1:NM_001080118:chr11:-:27:80	uORF	0.0272757	0.0769906	0.354273
MEF2A:NM_001171894:chr15:+:123:245	Mef2a:NM_001033713:chr7:-:53:295	uORF	0.394664	0.400605	0.985171
MEGF9:NM_001080497:chr9:-:31:108	Megf9:NM_172694:chr4:-:23:85	uORF	0.227448	0.334474	0.680018
MEPCE:NM_019606:chr7:+:39:134	Mepce:NM_144913:chr5:-:284:379	uORF	0.106683	0.327556	0.325694
MESDC1:NM_022566:chr15:+:214:267	Mesdc1:NM_030705:chr7:-:218:271	uORF	0.303893	0.147023	2.06698
MESDC1:NM_022566:chr15:+:665:751	Mesdc1:NM_030705:chr7:-:554:631	uORF	0.292854	0.280275	1.04488
MESDC1:NM_022566:chr15:+:935:1015	Mesdc1:NM_030705:chr7:-:811:858	uORF	0.220272	0.272372	0.808719
METTL16:NM_024086:chr17:-:23:85	Mettl16:NM_026197:chr11:+:3:56	uORF	0.109867	0.191011	0.575185
MFHAS1:NM_004225:chr8:-:123:212	Mfhas1:NM_001081279:chr8:+:114:200	uORF	0.151143	0.0826446	1.82884
MFN2:NM_001127660:chr1:+:275:301	Mfn2:NM_001285920:chr4:-:223:249	uORF	0	0	NA
MGAT1:NM_001114617:chr5:-:126:260	Mgat1:NM_001110148:chr11:+:177:302	uORF	0.265371	0.460905	0.575761
MGAT1:NM_001114617:chr5:-:279:443	Mgat1:NM_001110148:chr11:+:321:455	uORF	0.501014	0.437809	1.14437
MGAT2:NM_002408:chr14:+:213:251	Mgat2:NM_146035:chr12:+:220:258	uORF	0.138698	0.381515	0.363547
MGAT5:NM_002410:chr2:+:7:51	Mgat5:NM_145128:chr1:+:496:540	uORF	0.113045	0.887828	0.127328
MID1:NM_000381:chrX:-:202:273	Mid1:NM_183151:chrX:+:144:341	uORF	0.355673	0.712373	0.499279
MID1:NM_000381:chrX:-:294:398	Mid1:NM_183151:chrX:+:258:341	uORF	0.048417	0.28202	0.17168
MID1:NM_001193277:chrX:-:98:187	Mid1:NM_183151:chrX:+:258:341	uORF	0.328714	0.731395	0.449434
MID1:NM_033290:chrX:-:125:190	Mid1:NM_183151:chrX:+:258:341	uORF	0.132174	0.377415	0.350209
MID1IP1:NM_021242:chrX:+:428:460	Mid1ip1:NM_001166635:chrX:+:78:353	uORF	0.0873936	0.197632	0.442203
MID1IP1:NM_021242:chrX:+:453:554	Mid1ip1:NM_001166635:chrX:+:211:312	uORF	0.293754	0.474937	0.618511
MIER1:NM_001077700:chr1:+:138:254	Mier1:NM_001286222:chr4:+:73:183	uORF	0.0519558	0.156527	0.331927
MIER1:NM_001146110:chr1:+:134:304	Mier1:NM_001286222:chr4:+:69:413	overlap.uORF	0.0082094	0.108727	0.0755048
MKKS:NM_018848:chr20:-:250:381	Mkks:NM_001141946:chr2:-:136:267	uORF	0.223845	0.135465	1.65243
MKKS:NM_018848:chr20:-:263:454	Mkks:NM_001141946:chr2:-:149:328	uORF	0.1411	0.525525	0.268493
MKKS:NM_018848:chr20:-:517:669	Mkks:NM_001141946:chr2:-:398:550	uORF	0.154779	0.431185	0.358963
MLEC:NM_014730:chr12:+:34:81	Mlec:NM_175403:chr5:-:33:80	uORF	0.213351	0.746741	0.28571
MLL5:NM_182931:chr7:+:149:373	Kmt2e:NM_026984:chr5:+:158:373	uORF	0.652773	0.933227	0.699479
MLL5:NM_182931:chr7:+:417:506	Kmt2e:NM_026984:chr5:+:364:441	uORF	0	0.0771708	0
MLLT10:NM_001195627:chr10:+:298:330	Mllt10:NM_001252560:chr2:+:229:261	uORF	0	0	NA
MMD:NM_012329:chr17:-:61:243	Mmd:NM_026178:chr11:+:49:267	overlap.uORF	0.477017	0.487691	0.978113
MME:NM_000902:chr3:+:29:100	Mme:NM_001289462:chr3:+:119:172	uORF	0.221707	0.636831	0.348142
MME:NM_007287:chr3:+:43:96	Mme:NM_001289462:chr3:+:401:454	uORF	0.0528684	0.191734	0.275738
MME:NM_007289:chr3:+:61:168	Mme:NM_001289463:chr3:+:121:219	uORF	0.162929	0.159924	1.01879
MOB3B:NM_024761:chr9:-:306:356	Mob3b:NM_178061:chr4:-:241:291	uORF	0.171914	0.265449	0.647637
MOK:NM_014226:chr14:-:66:119	Stk30:NM_011973:chr12:-:0:236	overlap.uORF	0.313365	0.526372	0.59533
MORC4:NM_001085354:chrX:-:116:214	Morc4:NM_001193309:chrX:-:6:377	overlap.uORF	0.222685	0.297207	0.749259
MORF4L1:NM_001265603:chr15:+:131:193	Morf4l1:NM_001039147:chr9:-:112:201	uORF	0.0235428	0.203201	0.11586
MORF4L2:NM_001142418:chrX:-:122:220	Morf4l2:NM_001168226:chrX:-:77:178	uORF	0.0920193	0.121652	0.756414
MORF4L2:NM_001142418:chrX:-:210:239	Morf4l2:NM_001168228:chrX:-:14:145	uORF	0.0468325	0.576154	0.0812846
MORF4L2:NM_001142419:chrX:-:140:202	Morf4l2:NM_001168226:chrX:-:77:178	uORF	0.621499	0.56626	1.09755
MORF4L2:NM_001142420:chrX:-:218:271	Morf4l2:NM_001168229:chrX:-:191:244	uORF	0.213412	0.16766	1.27288
MPP5:NM_022474:chr14:+:390:446	Mpp5:NM_019579:chr12:+:321:371	uORF	0.135552	0.143017	0.947799
MRE11A:NM_005590:chr11:-:186:287	Mre11a:NM_018736:chr9:+:46:126	uORF	0.702245	0.762666	0.920777
MSL2:NM_018133:chr3:-:371:412	Msl2:NM_001100451:chr9:+:170:211	uORF	0.113141	0.102539	1.10339
MSN:NM_002444:chrX:+:19:51	Msn:NM_010833:chrX:+:6:38	uORF	0.0496983	0	NA
MST1R:NM_001244937:chr3:-:71:163	Mst1r:NM_009074:chr9:+:46:177	uORF	0.306411	0.861528	0.35566
MTDH:NM_178812:chr8:+:125:316	Mtdh:NM_026002:chr15:+:72:305	uORF	0.334739	0.65774	0.508922
MTDH:NM_178812:chr8:+:42:128	Mtdh:NM_026002:chr15:+:35:124	uORF	0.137042	0.251158	0.545643
MTF1:NM_005955:chr1:-:32:127	Mtf1:NM_008636:chr4:+:37:132	uORF	0.0610503	0.181793	0.335823
MTF2:NM_001164391:chr1:+:261:287	Mtf2:NM_001253877:chr5:+:256:282	uORF	0	0.188486	0
MTF2:NM_001164391:chr1:+:66:101	Mtf2:NM_001253877:chr5:+:60:95	uORF	0.174403	0.151385	1.15205
MTFR1:NM_001145838:chr8:+:8:79	Mtfr1:NM_001253390:chr3:+:66:158	overlap.uORF	0.316765	0.746304	0.424445
MTMR3:NM_021090:chr22:+:102:212	Mtmr3:NM_028860:chr11:-:127:243	uORF	0.369924	0.333588	1.10893
MTSS1L:NM_138383:chr16:-:72:131	Mtss1l:NM_198625:chr8:+:53:112	uORF	0.052565	0.270706	0.194178
MYBL1:NM_001080416:chr8:-:155:193	Mybl1:NM_008651:chr1:-:15:53	uORF	0.156117	0.265909	0.587107
MYCBP2:NM_015057:chr13:-:8:70	Mycbp2:NM_207215:chr14:-:6:410	overlap.uORF	0.0741859	0.123777	0.599352
MYO10:NM_012334:chr5:-:181:225	Myo10:NM_019472:chr15:+:187:234	uORF	0.18532	0.201086	0.921598
MYO10:NM_012334:chr5:-:225:308	Myo10:NM_019472:chr15:+:159:905	overlap.uORF	0.372795	0.9923	0.375687
MYO19:NM_001033580:chr17:-:580:669	Myo19:NM_025414:chr11:+:55:303	uORF	0.35	0.63005	0.555511
MYO1E:NM_004998:chr15:-:206:241	Myo1e:NM_181072:chr9:+:184:219	uORF	0.127885	0.33038	0.387083
MZF1:NM_001267033:chr19:-:279:380	Mzf1:NM_145819:chr7:-:33:269	uORF	0.341303	0.608862	0.560559
NAA15:NM_057175:chr4:+:14:109	Naa15:NM_053089:chr3:+:21:200	uORF	0.269209	0.39395	0.683358
NAB1:NM_005966:chr2:+:113:238	Nab1:NM_008667:chr1:-:152:277	overlap.uORF	0.697205	0.81997	0.850281
NACC1:NM_052876:chr19:+:2:34	Nacc1:NM_025788:chr8:-:23:55	uORF	0.101255	0	NA
NACC2:NM_144653:chr9:-:7:126	Nacc2:NM_026495:chr2:-:69:152	uORF	0.231048	0.503835	0.458578
NALCN:NM_052867:chr13:-:122:181	Nalcn:NM_177393:chr14:-:301:360	uORF	0.18515	0.24539	0.754514
NARR:NM_001256281:chr17:-:102:182	Rab34:NM_033475:chr11:+:17:592	overlap.uORF	0.389963	0.480054	0.812332
NARS:NM_004539:chr18:-:125:172	Nars:NM_001142950:chr18:-:30:74	uORF	0.3277	0.472535	0.693493
NCDN:NM_001014839:chr1:+:89:118	Ncdn:NM_011986:chr4:-:383:439	overlap.uORF	0.111913	0.141345	0.791774
NCDN:NM_014284:chr1:+:160:342	Ncdn:NM_011986:chr4:-:173:367	uORF	0.20932	0.347735	0.601954
NCDN:NM_014284:chr1:+:358:390	Ncdn:NM_011986:chr4:-:383:439	overlap.uORF	0.0469153	0.136528	0.34363
NCK2:NM_001004722:chr2:+:249:272	Nck2:NM_010879:chr1:+:396:452	uORF	0.0663416	0	NA
NCKAP5L:NM_001037806:chr12:-:53:112	Nckap5l:NM_001001884:chr15:-:72:125	uORF	0.174894	0.762187	0.229464
NCOA3:NM_001174087:chr20:+:150:203	Ncoa3:NM_008679:chr2:+:109:162	uORF	0.160856	0.622	0.25861
NCOA6:NM_001242539:chr20:-:208:249	Ncoa6:NM_001242558:chr2:-:38:79	uORF	0.0663271	0.572355	0.115885
NCOR1:NM_006311:chr17:-:34:87	Ncor1:NM_177229:chr11:-:28:72	uORF	0.0351235	0.0821132	0.427745
NDST2:NM_003635:chr10:-:250:363	Ndst2:NM_010811:chr14:-:240:353	uORF	0.0824182	0.0610204	1.35067
NET1:NM_005863:chr10:+:88:168	Net1:NM_001047159:chr13:-:69:164	uORF	0.460817	0.581915	0.791896
NF2:NM_000268:chr22:+:286:387	Nf2:NM_001252250:chr11:-:402:503	uORF	0.0745057	0.199829	0.372847
NFE2L1:NM_003204:chr17:+:436:615	Nfe2l1:NM_001130450:chr11:-:412:588	uORF	0.141442	0.0697274	2.0285
NFIA:NM_001134673:chr1:+:194:229	Nfia:NM_001122953:chr4:+:77:121	uORF	0.0403798	0.564554	0.0715251
NFIB:NM_001190737:chr9:-:424:453	Nfib:NM_001113209:chr4:-:863:937	uORF	0	0.141345	0
NFYB:NM_006166:chr12:-:88:126	Nfyb:NM_010914:chr10:-:56:142	uORF	0	0	NA
NGF:NM_002506:chr1:-:69:113	Ngf:NM_001112698:chr3:+:78:122	uORF	0.0959088	0.125117	0.766551
NIPA2:NM_001008860:chr15:-:107:220	Nipa2:NM_001256130:chr7:-:120:230	uORF	0.242589	0.633624	0.38286
NIPA2:NM_001008860:chr15:-:315:422	Nipa2:NM_023647:chr7:-:955:1110	uORF	0.178545	0.312231	0.571837
NIPA2:NM_001184889:chr15:-:315:425	Nipa2:NM_023647:chr7:-:955:1110	uORF	0.198084	0.430324	0.460313
NIPA2:NM_030922:chr15:-:315:479	Nipa2:NM_023647:chr7:-:955:1110	uORF	0.411011	0.579811	0.708871
NIPBL:NM_015384:chr5:+:299:364	Nipbl:NM_027707:chr15:-:197:262	uORF	0	0	NA
NIPBL:NM_015384:chr5:+:394:462	Nipbl:NM_027707:chr15:-:349:381	uORF	0.0396251	0	NA
NIT1:NM_001185093:chr1:+:40:96	Nit1:NM_001242580:chr1:-:56:289	overlap.uORF	0.256827	0.507511	0.506052
NKX2-5:NM_001166175:chr5:-:150:212	Nkx2-5:NM_008700:chr17:-:131:193	uORF	0.226867	0.437908	0.51807
NR1D1:NM_021724:chr17:-:11:358	Nr1d1:NM_145434:chr11:-:189:632	overlap.uORF	0.361067	0.628486	0.574503
NR1D1:NM_021724:chr17:-:409:600	Nr1d1:NM_145434:chr11:-:412:603	uORF	0.190868	0.305065	0.625663
NR1H2:NM_001256647:chr19:+:211:273	Nr1h2:NM_001285518:chr7:-:236:301	uORF	0.25622	0	NA
NR2F2:NM_001145155:chr15:+:163:264	Nr2f2:NM_183261:chr7:-:458:493	uORF	0.178548	0.312545	0.571272
NREP:NM_001142476:chr5:-:312:365	Nrep:NM_001109988:chr18:-:213:272	uORF	0.0853142	0.0762196	1.11932
NREP:NM_001142483:chr5:-:391:468	Nrep:NM_001109988:chr18:-:213:272	uORF	0.163177	0.120307	1.35634
NRG4:NM_138573:chr15:-:41:163	Nrg4:NM_032002:chr9:-:11:127	uORF	0.445596	0.423554	1.05204
NRP1:NM_001024628:chr10:-:242:307	Nrp1:NM_008737:chr8:+:199:264	uORF	0.0225581	0.0577208	0.390814
NRP2:NM_003872:chr2:+:228:368	Nrp2:NM_001077403:chr1:+:385:450	uORF	0.260999	0.453428	0.575614
NSD1:NM_172349:chr5:+:106:153	Nsd1:NM_008739:chr13:+:85:171	overlap.uORF	0.0919444	0.36728	0.250339
NUCKS1:NM_022731:chr1:-:35:58	Nucks1:NM_001145804:chr1:+:45:68	uORF	0	0	NA
NUDCD1:NM_032869:chr8:-:13:84	Nudcd1:NM_001113554:chr15:-:432:503	uORF	0.1027	0.128754	0.797645
NUDT4:NM_019094:chr12:+:129:191	Nudt4:NM_027722:chr10:-:161:223	uORF	0.221294	0.605524	0.365459
NUMB:NM_001005743:chr14:-:220:318	Numb:NM_001272056:chr12:-:145:243	uORF	0.0838558	0.10521	0.797033
NUMB:NM_001005743:chr14:-:90:170	Numb:NM_001272056:chr12:-:10:243	uORF	0.490401	0.712824	0.68797
NUS1:NM_138459:chr6:+:126:155	Nus1:NM_030250:chr10:+:103:132	uORF	0.0530398	0	NA
NXT2:NM_001242617:chrX:+:38:88	Nxt2:NM_172782:chrX:+:28:78	uORF	0.294912	0.689337	0.42782
ODF2:NM_002540:chr9:+:448:597	Odf2:NM_013615:chr2:+:344:487	overlap.uORF	0.0760711	0.0688278	1.10524
OGT:NM_181672:chrX:+:101:184	Ogt:NM_139144:chrX:+:1:153	uORF	0.397582	0.357404	1.11241
OSBPL1A:NM_018030:chr18:-:170:448	Osbpl1a:NM_001252491:chr18:-:290:664	uORF	0.787458	3.39412	0.232007
OSBPL1A:NM_018030:chr18:-:511:624	Osbpl1a:NM_001252491:chr18:-:368:664	uORF	0.639736	0.508018	1.25928
OSGIN2:NM_001126111:chr8:+:318:350	Osgin2:NM_145950:chr4:-:70:288	overlap.uORF	0.0447428	0	NA
OSR2:NM_001142462:chr8:+:286:387	Osr2:NM_054049:chr15:+:221:322	uORF	0.283922	0.453878	0.625546
OSR2:NM_001142462:chr8:+:93:182	Osr2:NM_054049:chr15:+:43:129	uORF	0.321245	0.395639	0.811965
OXSR1:NM_005109:chr3:+:17:184	Oxsr1:NM_133985:chr9:-:10:303	uORF	0.446217	0.506882	0.880318
P2RY2:NM_002564:chr11:+:171:272	P2ry2:NM_008773:chr7:-:311:409	uORF	0.276334	0.781549	0.353573
P4HA2:NM_001142598:chr5:-:44:100	P4ha2:NM_001136076:chr11:+:12:143	uORF	0.25853	0.483867	0.5343
PA2G4:NM_006191:chr12:+:349:411	Pa2g4:NM_011119:chr10:-:40:93	uORF	0.25612	0.0743456	3.445
PABPC1:NM_002568:chr8:-:192:362	Pabpc1:NM_008774:chr15:-:194:322	uORF	0.195967	0.103749	1.88885
PACSIN3:NM_001184975:chr11:-:167:286	Pacsin3:NM_028733:chr2:+:132:293	uORF	0.697347	0.968944	0.719698
PAFAH1B1:NM_000430:chr17:+:326:400	Pafah1b1:NM_013625:chr11:-:334:408	uORF	0.0188735	0.0565896	0.333515
PAK3:NM_002578:chrX:+:402:443	Pak3:NM_001195049:chrX:+:48:95	uORF	0.1481	0.11692	1.26668
PAK4:NM_001014831:chr19:+:140:181	Pak4:NM_027470:chr7:-:150:203	uORF	0.22335	0.835757	0.267242
PAK6:NM_020168:chr15:+:225:422	Pak6:NM_001033254:chr2:+:213:596	uORF	0.628906	0.865713	0.726461
PAM:NM_000919:chr5:+:7:84	Pam:NM_013626:chr1:-:155:214	uORF	0.294464	0.440058	0.669147
PANX1:NM_015368:chr11:+:259:315	Panx1:NM_019482:chr9:-:266:880	overlap.uORF	0.247852	0.401054	0.618002
PAPOLA:NM_001252006:chr14:+:150:191	Papola:NM_011112:chr12:+:144:179	uORF	0.0430383	0.118941	0.361847
PAPOLA:NM_001252006:chr14:+:36:71	Papola:NM_011112:chr12:+:31:66	uORF	0	0	NA
PARD3:NM_001184785:chr10:-:76:213	Pard3:NM_001122850:chr8:+:94:204	uORF	0.261913	0.141088	1.85637
PARP6:NM_020214:chr15:-:370:423	Parp6:NM_001205239:chr9:+:466:519	uORF	0.0842188	0.26732	0.315048
PBX1:NM_001204961:chr1:+:21:83	Pbx1:NM_008783:chr1:-:331:366	uORF	0	0	NA
PCDH7:NM_001173523:chr4:+:132:197	Pcdh7:NM_001122758:chr5:+:219:431	uORF	0.238636	1.57296	0.151712
PCDH7:NM_001173523:chr4:+:216:272	Pcdh7:NM_001122758:chr5:+:304:360	uORF	0.21681	0.129443	1.67494
PCDH7:NM_001173523:chr4:+:380:625	Pcdh7:NM_001122758:chr5:+:612:794	uORF	0.401509	0.546587	0.734574
PCDHGC3:NM_002588:chr5:+:9:50	Pcdhgc3:NM_033581:chr18:+:32:73	uORF	0	0	NA
PCED1A:NM_022760:chr20:-:293:403	Pced1a:NM_178762:chr2:-:235:414	uORF	0.292185	0.285438	1.02364
PCED1B:NM_138371:chr12:+:217:375	Pced1b:NM_172293:chr15:+:354:407	uORF	0.23855	0.84339	0.282847
PCGF3:NM_006315:chr4:+:229:318	Pcgf3:NM_172716:chr5:+:163:252	uORF	0.358979	0.458735	0.78254
PCGF3:NM_006315:chr4:+:326:361	Pcgf3:NM_172716:chr5:+:260:316	overlap.uORF	0.437975	0.779829	0.561629
PCIF1:NM_022104:chr20:+:30:173	Pcif1:NM_146129:chr2:+:25:168	uORF	0.0838767	0.136035	0.616581
PCMTD1:NM_052937:chr8:-:190:297	Pcmtd1:NM_183028:chr1:+:286:393	uORF	0.213991	0.31521	0.678882
PCNX:NM_014982:chr14:+:173:349	Pcnx:NM_018814:chr12:+:91:255	uORF	0.116819	0.273004	0.427904
PCSK7:NM_004716:chr11:-:112:201	Pcsk7:NM_001281934:chr9:+:806:871	uORF	0.281393	0.527097	0.533855
PDCD10:NM_007217:chr3:-:344:397	Pdcd10:NM_019745:chr3:-:200:253	uORF	0.0260293	0.0890366	0.292343
PDCD4:NM_001199492:chr10:+:253:279	Pdcd4:NM_001168491:chr19:+:169:195	uORF	0.110154	0	NA
PDE1C:NM_001191056:chr7:-:233:304	Pde1c:NM_001025568:chr6:-:340:411	uORF	0.301389	0.381093	0.790854
PDE4DIP:NM_001002811:chr1:-:207:260	Pde4dip:NM_178080:chr3:-:308:361	uORF	0.398081	1.09613	0.363171
PDE4DIP:NM_001198832:chr1:-:262:348	Pde4dip:NM_177145:chr3:-:264:353	uORF	0.228525	0.312586	0.731078
PDGFC:NM_016205:chr4:-:341:424	Pdgfc:NM_019971:chr3:+:876:959	uORF	0.0965555	0.262885	0.367291
PDXDC1:NM_015027:chr16:+:150:185	Pdxdc1:NM_001039533:chr16:-:126:161	uORF	0.0987148	0.376326	0.262312
PEAK1:NM_024776:chr15:-:331:384	Peak1:NM_172924:chr9:-:202:255	uORF	0.249884	0.150451	1.6609
PELO:NM_015946:chr5:+:121:213	Itga1:NM_001033228:chr13:-:125:460	overlap.uORF	0.308694	0.857558	0.359969
PELO:NM_015946:chr5:+:189:233	Itga1:NM_001033228:chr13:-:192:236	uORF	0.164539	0.133859	1.2292
PELO:NM_015946:chr5:+:32:88	Itga1:NM_001033228:chr13:-:34:87	uORF	0.343017	0.694372	0.493996
PHF12:NM_001033561:chr17:-:182:238	Phf12:NM_174852:chr11:+:145:201	uORF	0.110491	0.0694982	1.58984
PHF12:NM_001033561:chr17:-:9:146	Phf12:NM_174852:chr11:+:2:109	uORF	0.0461969	0.0992987	0.465231
PHF14:NM_014660:chr7:+:45:182	Phf14:NM_001168382:chr6:+:88:180	uORF	0.314192	0.342972	0.916088
PHF21A:NM_001101802:chr11:-:404:571	Phf21a:NM_138755:chr2:+:75:230	uORF	0.129971	0.0620605	2.09426
PHIP:NM_017934:chr6:-:95:211	Phip:NM_001081216:chr9:-:31:303	overlap.uORF	0.0648095	0.062271	1.04076
PHKB:NM_001031835:chr16:+:52:144	Phkb:NM_199446:chr8:+:26:118	uORF	0.0792208	0.312231	0.253725
PHOSPHO2-KLHL23:NM_001199290:chr2:+:181:330	Phospho2:NM_028521:chr2:+:250:381	uORF	0.595685	0.901232	0.660968
PI4KB:NM_001198773:chr1:-:295:324	Pi4kb:NM_175356:chr3:+:263:292	uORF	0	0.206559	0
PIBF1:NM_006346:chr13:+:100:141	Pibf1:NM_029320:chr14:+:440:625	uORF	0.204346	0.693754	0.294552
PIGF:NM_002643:chr2:-:92:142	Pigf:NM_008838:chr17:-:50:103	uORF	0.195803	0.271178	0.722045
PIGV:NM_017837:chr1:+:83:313	Pigv:NM_001145955:chr4:-:67:165	uORF	0.364275	0.432987	0.841308
PIK3CD:NM_005026:chr1:+:94:198	Pik3cd:NM_001029837:chr4:-:161:268	uORF	0.30313	0.336727	0.900226
PIK3R1:NM_181523:chr5:+:237:320	Pik3r1:NM_001077495:chr13:-:283:366	uORF	0.0842656	0.185348	0.454635
PIK3R1:NM_181523:chr5:+:388:522	Pik3r1:NM_001077495:chr13:-:429:563	uORF	0.197826	0.529381	0.373693
PIK3R2:NM_005027:chr19:+:113:205	Pik3r2:NM_008841:chr8:-:126:278	uORF	0.768837	0	NA
PIP5K1A:NM_001135636:chr1:+:257:313	Pip5k1a:NM_008847:chr3:-:237:293	uORF	0.181031	1.34739	0.134357
PITPNC1:NM_012417:chr17:+:612:698	Pitpnc1:NM_145823:chr11:-:514:624	uORF	0.46067	0.740275	0.622296
PITX1:NM_002653:chr5:-:1:141	Pitx1:NM_011097:chr13:-:139:645	overlap.uORF	0.207522	0.311396	0.666424
PITX1:NM_002653:chr5:-:23:301	Pitx1:NM_011097:chr13:-:336:392	uORF	0.170686	0.150168	1.13663
PJA2:NM_014819:chr5:-:55:156	Pja2:NM_001025309:chr17:-:31:162	uORF	0.211972	0.310537	0.682601
PKIB:NM_032471:chr6:+:291:320	Pkib:NM_001039051:chr10:+:19:282	uORF	0.053309	0.564067	0.0945082
PKIG:NM_007066:chr20:+:225:248	Pkig:NM_001039390:chr2:+:234:257	uORF	0	2.16778	0
PKNOX1:NM_004571:chr21:+:77:163	Pknox1:NM_016670:chr17:+:43:147	uORF	0.0561748	0.207207	0.271105
PKP4:NM_001005476:chr2:+:208:246	Pkp4:NM_026361:chr2:+:232:270	uORF	0.0855788	0.0944254	0.906311
PLAGL1:NM_001080951:chr6:-:694:750	Plagl1:NM_009538:chr10:+:486:542	uORF	0.144717	0.239117	0.605212
PLEKHA6:NM_014935:chr1:-:241:273	Plekha6:NM_001160268:chr1:+:51:83	uORF	0.13093	0	NA
PLK4:NM_001190799:chr4:+:76:165	Plk4:NM_011495:chr3:+:115:201	uORF	0.21333	0.497297	0.428979
PLOD3:NM_001084:chr7:-:151:318	Plod3:NM_011962:chr5:+:207:647	uORF	0.722799	1.61712	0.446967
PLS3:NM_005032:chrX:+:208:360	Pls3:NM_001166453:chrX:-:1:72	uORF	0.0643274	0.164275	0.391584
PLXDC2:NM_032812:chr10:+:49:252	Plxdc2:NM_026162:chr2:+:212:292	uORF	0.31875	0.377334	0.844744
PLXNA2:NM_025179:chr1:-:281:406	Plxna2:NM_008882:chr1:+:233:433	uORF	0.443052	0.912745	0.485407
PLXNB1:NM_001130082:chr3:-:62:100	Plxnb1:NM_172775:chr9:+:228:266	uORF	0.0806144	0.109284	0.737661
PNPLA8:NM_001256008:chr7:-:208:318	Pnpla8:NM_026164:chr12:+:15:176	uORF	0.345342	0.632542	0.545959
PNPLA8:NM_015723:chr7:-:387:476	Pnpla8:NM_026164:chr12:+:15:176	uORF	0.726197	1.12529	0.645345
PNRC2:NM_017761:chr1:+:227:397	Pnrc2:NM_026383:chr4:-:211:381	uORF	0.0817245	0.315282	0.259211
POC1A:NM_001161581:chr3:-:105:389	Poc1a:NM_027354:chr9:+:125:370	uORF	0.533897	0.500524	1.06667
POLG:NM_001126131:chr15:-:132:203	Polg:NM_017462:chr7:-:226:297	uORF	0.227404	0.263156	0.864141
PPAP2B:NM_003713:chr1:-:136:342	Ppap2b:NM_080555:chr4:+:162:302	uORF	0.196306	0.388527	0.505258
PPARD:NM_001171818:chr6:+:144:188	Ppard:NM_011145:chr17:+:131:175	uORF	0.217684	0.371308	0.586263
PPIP5K1:NM_001130858:chr15:-:138:185	Ppip5k1:NM_178795:chr2:-:47:106	uORF	0.144804	0.275987	0.524678
PPM1A:NM_021003:chr14:+:152:226	Ppm1a:NM_008910:chr12:+:191:265	uORF	0.150503	0.103613	1.45255
PPP1CB:NM_002709:chr2:+:108:281	Ppp1cb:NM_172707:chr5:+:75:314	uORF	0.281137	0.278439	1.00969
PPP1CB:NM_002709:chr2:+:28:117	Ppp1cb:NM_172707:chr5:+:35:133	uORF	0.143708	0.126199	1.13875
PPP1R15A:NM_014330:chr19:+:162:242	Ppp1r15a:NM_008654:chr7:-:179:259	uORF	0.13474	0.523098	0.257581
PPP1R15B:NM_032833:chr1:-:174:329	Ppp1r15b:NM_133819:chr1:+:351:506	uORF	0.422646	0.58408	0.72361
PPP1R37:NM_019121:chr19:+:65:136	Ppp1r37:NM_199149:chr7:-:277:348	uORF	0.0418447	0.108148	0.386921
PPP2R2A:NM_002717:chr8:+:160:264	Ppp2r2a:NM_001205188:chr14:-:185:319	uORF	0.209071	0.371003	0.563528
PPP2R3A:NM_002718:chr3:+:200:259	Ppp2r3a:NM_001161362:chr9:-:211:252	uORF	0.263157	0.147659	1.78219
PPP2R3A:NM_002718:chr3:+:417:464	Ppp2r3a:NM_001161362:chr9:-:411:458	uORF	0.119254	0.46029	0.259085
PPP2R4:NM_178000:chr9:+:107:157	Ppp2r4:NM_138748:chr2:+:93:143	uORF	0.218544	0.573841	0.380845
PPP2R4:NM_178000:chr9:+:30:131	Ppp2r4:NM_138748:chr2:+:16:117	uORF	0.303506	0.174603	1.73826
PPP2R5C:NM_002719:chr14:+:85:108	Ppp2r5c:NM_001081457:chr12:+:65:88	uORF	0	0	NA
PPP3CB:NM_001142353:chr10:-:40:75	Ppp3cb:NM_008914:chr14:-:38:73	uORF	0	0	NA
PPP6R2:NM_001242898:chr22:+:116:331	Ppp6r2:NM_026813:chr15:+:109:246	uORF	0.371588	0.530471	0.700485
PPP6R3:NM_001164160:chr11:+:201:239	Ppp6r3:NM_028999:chr19:-:198:236	uORF	0	0.188486	0
PPP6R3:NM_001164160:chr11:+:47:76	Ppp6r3:NM_001164159:chr19:-:46:75	uORF	0.16429	0.167358	0.981671
PRKD2:NM_001079880:chr19:-:96:404	Prkd2:NM_001252458:chr7:+:2:223	uORF	0.810825	1.26509	0.640922
PRKD2:NM_016457:chr19:-:534:683	Prkd2:NM_001252458:chr7:+:2:223	uORF	0.583729	1.20272	0.485341
PRKD3:NM_005813:chr2:-:411:506	Prkd3:NM_001171004:chr17:-:619:699	uORF	0.374983	0.581204	0.645183
PROSAPIP1:NM_014731:chr20:-:621:731	Lzts3:NM_197945:chr2:-:104:214	overlap.uORF	0.177387	0.225162	0.78782
PRPF39:NM_017922:chr14:+:124:162	Prpf39:NM_177806:chr12:+:108:146	uORF	0.237829	0.391235	0.607893
PRPSAP2:NM_001243936:chr17:+:139:204	Prpsap2:NM_001164243:chr11:-:104:208	uORF	0.0405721	0.0856141	0.473895
PRPSAP2:NM_002767:chr17:+:178:267	Prpsap2:NM_001164243:chr11:-:104:208	uORF	0.0307573	0.103797	0.296321
PRR11:NM_018304:chr17:+:251:307	Prr11:NM_175563:chr11:-:18:74	uORF	0.244983	0.323215	0.757957
PRR7:NM_001174101:chr5:+:213:371	Prr7:NM_001030296:chr13:+:193:351	uORF	0.147197	0.306084	0.480902
PSMD3:NM_002809:chr17:+:83:184	Psmd3:NM_009439:chr11:+:56:157	uORF	0.180129	0.0690791	2.60758
PTEN:NM_000314:chr10:+:271:408	Pten:NM_008960:chr19:+:127:264	uORF	0.0548083	0.106187	0.516149
PTGER4:NM_000958:chr5:+:39:134	Ptger4:NM_001136079:chr15:-:54:149	uORF	0.207297	0.216658	0.956793
PTP4A1:NM_003463:chr6:+:666:800	Ptp4a1:NM_011200:chr1:-:168:302	uORF	0.00950801	0.0806443	0.117901
PTP4A1:NM_003463:chr6:+:975:1061	Ptp4a1:NM_011200:chr1:-:446:697	uORF	0.661684	0.469465	1.40944
PTP4A2:NM_001195100:chr1:-:210:239	Ptp4a2:NM_001164745:chr4:+:300:329	uORF	0	0	NA
PTP4A2:NM_001195100:chr1:-:30:95	Ptp4a2:NM_008974:chr4:+:99:218	uORF	0.040913	0.0827037	0.494693
PTP4A2:NM_001195100:chr1:-:496:531	Ptp4a2:NM_001164745:chr4:+:593:628	uORF	0.077705	0	NA
PTP4A2:NM_080391:chr1:-:377:496	Ptp4a2:NM_008974:chr4:+:99:218	uORF	0.0218145	0.0884225	0.246708
PTPN9:NM_002833:chr15:-:2:181	Ptpn9:NM_019651:chr9:+:25:405	uORF	0.470043	1.21175	0.387903
PTPRG:NM_002841:chr3:+:226:270	Ptprg:NM_008981:chr14:+:203:247	uORF	0.0327093	0.0992582	0.329537
PTPRG:NM_002841:chr3:+:24:101	Ptprg:NM_008981:chr14:+:1:78	uORF	0.035874	0.0580378	0.618115
PTPRK:NM_001135648:chr6:-:152:211	Ptprk:NM_008983:chr10:+:44:103	uORF	0.195019	0	NA
PUS7:NM_019042:chr7:-:136:216	Pus7:NM_001289780:chr5:-:5:229	uORF	0.313875	0.313538	1.00108
QSER1:NM_001076786:chr11:+:97:231	Qser1:NM_001123327:chr2:-:99:389	overlap.uORF	0.335769	0.296853	1.13109
R3HCC1:NM_001136108:chr8:+:96:230	R3hcc1:NM_001146012:chr14:-:139:246	uORF	0.214722	0.0416793	5.15176
R3HDM1:NM_015361:chr2:+:134:187	R3hdm1:NM_181750:chr1:+:191:244	uORF	0.0494338	0.117511	0.420672
R3HDM1:NM_015361:chr2:+:17:115	R3hdm1:NM_181750:chr1:+:68:172	uORF	0.108294	0.268531	0.403282
R3HDM1:NM_015361:chr2:+:195:347	R3hdm1:NM_181750:chr1:+:252:404	uORF	0.0715274	0.210156	0.340353
RAB10:NM_016131:chr2:+:440:691	Rab10:NM_016676:chr12:-:8:493	uORF	0.228644	0.322664	0.708612
RAB21:NM_014999:chr12:+:64:168	Rab21:NM_024454:chr10:-:50:151	uORF	0.30984	0.497347	0.622986
RAB22A:NM_020673:chr20:+:188:226	Rab22a:NM_024436:chr2:+:187:225	uORF	0.132698	0.0938724	1.4136
RAB22A:NM_020673:chr20:+:24:74	Rab22a:NM_024436:chr2:+:24:74	uORF	0.061631	0.621712	0.0991311
RAB25:NM_020387:chr1:+:34:153	Rab25:NM_016899:chr3:-:39:131	uORF	0.543807	0.75137	0.723754
RAB5B:NM_001252037:chr12:+:84:137	Rab5b:NM_177411:chr10:-:38:91	uORF	0.0826473	0.0834348	0.990561
RAB6A:NM_001243718:chr11:-:117:236	Rab6a:NM_001163663:chr7:+:230:328	uORF	0.64053	0.536027	1.19496
RAB6A:NM_001243718:chr11:-:313:513	Rab6a:NM_001163663:chr7:+:423:671	overlap.uORF	0.50585	0.514074	0.984003
RABEP1:NM_001083585:chr17:+:27:158	Rabep1:NM_019400:chr11:+:16:147	uORF	0.0455717	0.142476	0.319855
RAD21:NM_006265:chr8:-:54:104	Rad21:NM_009009:chr15:-:11:61	uORF	0.0292072	0.170838	0.170965
RAD23B:NM_002874:chr9:+:51:77	Rad23b:NM_009011:chr4:+:37:60	uORF	0	0	NA
RAF1:NM_002880:chr3:-:242:295	Raf1:NM_029780:chr6:-:274:327	uORF	0.0293634	0.395313	0.074279
RAI1:NM_030665:chr17:+:247:306	Rai1:NM_009021:chr11:+:308:367	uORF	0.179153	0.172628	1.0378
RALB:NM_002881:chr2:+:35:94	Ralb:NM_022327:chr1:-:90:149	uORF	0.18776	0.229433	0.818363
RALGAPB:NM_020336:chr20:+:9:158	Ralgapb:NM_177658:chr2:+:2:184	uORF	0.43249	0.419606	1.0307
RALGPS2:NM_152663:chr1:+:260:283	Ralgps2:NM_001159965:chr1:-:140:166	uORF	0.0582252	0	NA
RAP2B:NM_002886:chr3:+:11:82	Rap2b:NM_028712:chr3:+:128:199	uORF	0.129042	0.183969	0.701431
RARG:NM_000966:chr12:-:88:159	Rarg:NM_011244:chr15:-:86:157	uORF	0.0203169	0.0542429	0.374555
RASA1:NM_002890:chr5:+:96:185	Rasa1:NM_145452:chr13:-:295:582	overlap.uORF	0.345166	0.283107	1.21921
RASAL2:NM_170692:chr1:+:30:413	Rasal2:NM_177644:chr1:-:261:353	uORF	0.195085	0.37381	0.521884
RB1CC1:NM_001083617:chr8:-:333:461	Rb1cc1:NM_009826:chr1:+:240:353	uORF	0.164932	0.188846	0.873368
RBCK1:NM_006462:chr20:+:176:640	Rbck1:NM_001083921:chr2:-:40:267	uORF	0.608515	0.678145	0.897323
RBFOX2:NM_001031695:chr22:-:140:214	Rbfox2:NM_001110828:chr15:-:39:113	uORF	0	0.0773167	0
RBM10:NM_001204466:chrX:+:101:190	Rbm10:NM_001167775:chrX:+:374:688	uORF	0.697185	0.75034	0.929159
RBM10:NM_001204466:chrX:+:229:336	Rbm10:NM_001167775:chrX:+:510:641	uORF	0.40873	0.451167	0.905939
RBM25:NM_021239:chr14:+:80:205	Rbm25:NM_027349:chr12:+:47:220	overlap.uORF	0.608974	1.25538	0.485092
RBM27:NM_018989:chr5:+:52:84	Rbm27:NM_172626:chr18:+:69:101	uORF	0.182815	0.203201	0.899679
RBM39:NM_001242599:chr20:-:179:238	Rbm39:NM_133242:chr2:-:155:214	uORF	0.25575	0	NA
RBM5:NM_005778:chr3:+:79:159	Rbm5:NM_148930:chr9:-:71:151	uORF	0.322927	0.445623	0.724663
RBMS1:NM_002897:chr2:-:2:55	Rbms1:NM_020296:chr2:-:2:58	uORF	0.0260759	0	NA
RBMXL1:NM_001162536:chr1:-:377:547	Ccbl2:NM_173763:chr3:+:97:267	overlap.uORF	0.523228	0.479213	1.09185
RC3H2:NM_001100588:chr9:-:46:150	Rc3h2:NM_001100591:chr2:-:10:114	uORF	0.0423064	0.0721623	0.586268
RDX:NM_001260492:chr11:-:0:284	Rdx:NM_001104617:chr9:+:82:498	uORF	0.430703	0.516127	0.83449
RELL2:NM_173828:chr5:+:697:945	Rell2:NM_153793:chr18:+:250:426	overlap.uORF	0.297518	0.730352	0.407362
REPIN1:NM_001099695:chr7:+:113:184	Repin1:NM_001079901:chr6:+:131:202	uORF	0.203446	0.116799	1.74184
REST:NM_005612:chr4:+:51:170	Rest:NM_011263:chr5:+:13:135	uORF	0.192898	0.177613	1.08606
RFC1:NM_001204747:chr4:-:62:82	Rfc1:NM_011258:chr5:-:36:56	uORF	0	0.770365	0
RFTN1:NM_015150:chr3:-:191:280	Rftn1:NM_181397:chr17:-:201:275	uORF	0.613113	0.495995	1.23613
RHEB:NM_005614:chr7:-:314:379	Rheb:NM_053075:chr5:-:23:91	uORF	0.179226	0.341795	0.524368
RHOA:NM_001664:chr3:-:25:171	Rhoa:NM_016802:chr9:+:98:244	uORF	0.127291	0.105381	1.20792
RHOB:NM_004040:chr2:+:201:284	Rhob:NM_007483:chr12:-:164:238	uORF	0.171691	0.234431	0.732371
RHOBTB2:NM_015178:chr8:+:266:358	Rhobtb2:NM_153514:chr14:-:241:336	uORF	0.187931	0.445169	0.422156
RHOBTB2:NM_015178:chr8:+:73:240	Rhobtb2:NM_153514:chr14:-:17:70	uORF	0.187573	0.235453	0.796648
RHOQ:NM_012249:chr2:+:8:259	Rhoq:NM_145491:chr17:+:184:435	uORF	0.123595	0.139009	0.889112
RND3:NM_001254738:chr2:-:43:78	Rnd3:NM_028810:chr2:-:17:61	uORF	0.278242	0.341062	0.815811
RNF11:NM_014372:chr1:+:321:371	Rnf11:NM_013876:chr4:-:104:151	uORF	0.136636	0.172516	0.792019
RNF13:NM_007282:chr3:+:214:603	Rnf13:NM_001113413:chr3:+:14:85	uORF	0.364453	0.582371	0.625809
RNF146:NM_001242844:chr6:+:366:416	Rnf146:NM_001110196:chr10:-:487:537	uORF	0.183977	1.44881	0.126985
RNF146:NM_001242844:chr6:+:413:460	Rnf146:NM_001110196:chr10:-:543:581	uORF	0.160189	0.292043	0.54851
RNF167:NM_015528:chr17:+:69:362	Rnf167:NM_027445:chr11:+:22:195	uORF	0.22768	0.444292	0.512457
RNF182:NM_001165032:chr6:+:419:529	Rnf182:NM_183204:chr13:+:191:430	uORF	0.598894	0.864121	0.693067
RNF19A:NM_183419:chr8:-:233:274	Rnf19a:NM_013923:chr15:-:185:226	uORF	0.163915	0.19151	0.855906
RNF34:NM_001256858:chr12:+:80:133	Rnf34:NM_030564:chr5:+:55:108	overlap.uORF	0.119755	0	NA
RNF41:NM_001242826:chr12:-:150:191	Rnf41:NM_001164237:chr10:+:248:289	uORF	0.189456	0.258891	0.731797
RNF41:NM_001242826:chr12:-:200:265	Rnf41:NM_001164237:chr10:+:298:363	uORF	0.110245	0.473965	0.232601
RNF44:NM_014901:chr5:-:81:164	Rnf44:NM_001146025:chr13:-:7:387	overlap.uORF	0.588028	0.32859	1.78955
RNF6:NM_005977:chr13:-:369:428	Rnf6:NM_001256085:chr5:-:32:91	uORF	0.191553	0.400055	0.478815
RNF6:NM_005977:chr13:-:406:450	Rnf6:NM_001256085:chr5:-:69:113	uORF	0.266285	0.200133	1.33054
RNPS1:NM_006711:chr16:-:151:273	Rnps1:NM_001080127:chr17:+:58:138	uORF	0.0340201	0	NA
RNPS1:NM_080594:chr16:-:356:436	Rnps1:NM_001080127:chr17:+:58:138	uORF	0.0167206	0	NA
ROBO1:NM_001145845:chr3:-:264:359	Robo1:NM_019413:chr16:+:266:361	uORF	0.117611	0.53678	0.219105
ROBO1:NM_001145845:chr3:-:359:526	Robo1:NM_019413:chr16:+:361:492	uORF	0.244072	0.368256	0.662777
ROBO1:NM_001145845:chr3:-:592:753	Robo1:NM_019413:chr16:+:462:704	uORF	0.322458	0.500042	0.644862
ROCK1:NM_005406:chr18:-:712:792	Rock1:NM_009071:chr18:-:251:331	uORF	0.117147	0.145534	0.80495
RPAP1:NM_015540:chr15:-:19:57	Rpap1:NM_001163701:chr2:-:34:66	uORF	0.250885	0.707219	0.354749
RPL35A:NM_000996:chr3:+:26:64	Rpl35a:NM_021338:chr16:+:23:127	uORF	0.155261	0.574101	0.270441
RPLP0:NM_001002:chr12:-:151:177	Rplp0:NM_007475:chr5:+:95:121	uORF	0	0	NA
RPS12:NM_001016:chr6:+:40:72	Rps12:NM_011295:chr10:-:31:81	uORF	0.146504	0.14773	0.991696
RPTOR:NM_001163034:chr17:+:250:309	Rptor:NM_028898:chr11:+:251:310	uORF	0.0617272	0.191245	0.322765
RPTOR:NM_001163034:chr17:+:52:96	Rptor:NM_028898:chr11:+:46:96	uORF	0.0992582	0.397032	0.250001
RREB1:NM_001003698:chr6:+:444:479	Rreb1:NM_001039188:chr13:+:497:577	uORF	0.0369523	0.529518	0.0697848
RSPRY1:NM_133368:chr16:+:11:154	Rspry1:NM_026274:chr8:+:52:402	uORF	0.283077	0.348847	0.811465
RSPRY1:NM_133368:chr16:+:161:277	Rspry1:NM_026274:chr8:+:528:641	uORF	0.169896	0.535794	0.317091
RUNX1:NM_001001890:chr21:-:230:376	Runx1:NM_001111023:chr16:-:308:391	uORF	0.184876	0.169905	1.08811
RUNX1:NM_001001890:chr21:-:828:890	Runx1:NM_001111023:chr16:-:798:857	uORF	0.15608	0.0727686	2.14489
RUNX1:NM_001001890:chr21:-:977:1120	Runx1:NM_001111023:chr16:-:949:999	uORF	0.0817154	0.116728	0.700052
RWDD1:NM_001007464:chr6:+:141:224	Rwdd1:NM_025614:chr10:-:45:311	overlap.uORF	0.173586	0	NA
S100A14:NM_020672:chr1:-:41:73	S100a14:NM_001163525:chr3:+:75:107	uORF	0.113904	0.284098	0.400933
SAMD12:NM_001101676:chr8:-:101:124	Samd12:NM_177225:chr15:-:27:50	uORF	0	0.270521	0
SAMD9:NM_001193307:chr7:-:40:138	Samd9l:NM_010156:chr6:-:168:284	uORF	0.438524	0.661561	0.662862
SAR1B:NM_001033503:chr5:-:19:90	Sar1b:NM_025535:chr11:+:29:136	uORF	0.5781	0.399441	1.44727
SAT1:NM_002970:chrX:+:88:123	Sat1:NM_009121:chrX:-:135:170	uORF	0.0422961	0	NA
SBF2:NM_030962:chr11:-:11:61	Sbf2:NM_177324:chr7:-:29:79	uORF	0.162955	0.0758443	2.14855
SCMH1:NM_001172218:chr1:-:202:315	Scmh1:NM_001159630:chr4:+:292:483	overlap.uORF	0.117563	0.406931	0.288902
SCMH1:NM_001172218:chr1:-:85:156	Scmh1:NM_001159630:chr4:+:176:247	uORF	0.192684	0.12433	1.54978
SEC24C:NM_004922:chr10:+:16:147	Sec24c:NM_001168273:chr14:+:13:96	uORF	0.221805	0.494107	0.4489
SECISBP2L:NM_001193489:chr15:-:198:236	Secisbp2l:NM_177608:chr2:-:186:224	uORF	0.0773423	0.271329	0.28505
SEMA3A:NM_006080:chr7:-:58:183	Sema3a:NM_009152:chr5:+:359:469	uORF	0.143438	0.277039	0.517752
SEMA4D:NM_001142287:chr9:-:360:488	Sema4d:NM_001281880:chr13:-:446:517	uORF	0.330275	0.296887	1.11246
SEMA5A:NM_003966:chr5:-:153:401	Sema5a:NM_009154:chr15:+:107:316	uORF	0.746484	1.06976	0.697807
SENP6:NM_001100409:chr6:+:304:387	Senp6:NM_146003:chr9:+:330:407	uORF	0.0913652	0.435931	0.209587
SERTAD1:NM_013376:chr19:-:86:139	Sertad1:NM_018820:chr7:+:53:106	uORF	0.161624	0.218826	0.738596
SESN2:NM_031459:chr1:+:87:146	Sesn2:NM_144907:chr4:-:3:71	uORF	0.155734	0.154377	1.00879
SETD5:NM_001080517:chr3:+:327:407	Setd5:NM_028385:chr6:+:82:162	uORF	0.0603272	0.0903705	0.667554
SETD5:NM_001080517:chr3:+:338:394	Setd5:NM_028385:chr6:+:93:131	uORF	0.0785127	0.117845	0.666234
SETX:NM_015046:chr9:-:71:133	Setx:NM_198033:chr2:+:439:621	uORF	0.543666	0.53669	1.013
SF1:NM_004630:chr11:-:88:186	Sf1:NM_001110791:chr19:+:20:298	uORF	0.15682	0.497663	0.315113
SFSWAP:NM_001261411:chr12:+:18:65	Sfswap:NM_172276:chr5:+:24:71	uORF	0.164578	0.487165	0.337828
SGK3:NM_013257:chr8:+:114:191	Sgk3:NM_001037759:chr1:+:110:160	uORF	0.164542	0.24023	0.684933
SGMS1:NM_147156:chr10:-:473:511	Sgms1:NM_001168525:chr19:-:853:915	uORF	0.299608	0.338196	0.885901
SGMS1:NM_147156:chr10:-:790:909	Sgms1:NM_001168525:chr19:-:996:1133	uORF	0.104864	0.179679	0.583619
SGMS2:NM_001136257:chr4:+:267:329	Sgms2:NM_028943:chr3:-:476:583	overlap.uORF	0.262759	0.483268	0.543714
SGOL1:NM_001199251:chr3:-:1:42	Sgol1:NM_028232:chr17:-:5:46	uORF	0.278152	0.12203	2.27938
SH2B3:NM_005475:chr12:+:138:182	Sh2b3:NM_008507:chr5:-:152:193	uORF	0	0.270117	0
SH3BP5L:NM_030645:chr1:-:218:394	Sh3bp5l:NM_001161338:chr11:+:178:354	uORF	0.296719	0.342537	0.866241
SH3BP5L:NM_030645:chr1:-:4:114	Sh3bp5l:NM_024480:chr11:+:4:114	uORF	0.288837	0.345722	0.835461
SH3D19:NM_001009555:chr4:-:915:980	Sh3d19:NM_001082414:chr3:+:70:120	uORF	0.110423	0.262032	0.42141
SH3RF2:NM_152550:chr5:+:123:236	Sh3rf2:NM_001146299:chr18:+:62:106	uORF	0.0498338	0.600583	0.0829757
SHB:NM_003028:chr9:-:309:428	Shb:NM_001033306:chr4:-:310:435	uORF	0.205455	0.344772	0.595917
SHOC2:NM_001269039:chr10:+:61:144	Shoc2:NM_001168505:chr19:+:151:195	uORF	0.293351	0.119554	2.45371
SIAH2:NM_005067:chr3:-:513:569	Siah2:NM_009174:chr3:-:315:515	uORF	0.0574443	0.121477	0.472882
SIL1:NM_001037633:chr5:-:26:130	Sil1:NM_030749:chr18:-:50:172	overlap.uORF	0.31168	0.170808	1.82473
SIL1:NM_022464:chr5:-:26:115	Sil1:NM_030749:chr18:-:50:172	overlap.uORF	0.143708	0.126199	1.13875
SIPA1L1:NM_015556:chr14:+:30:110	Sipa1l1:NM_001167983:chr12:+:241:324	uORF	0.327869	0.356023	0.920922
SIPA1L3:NM_015073:chr19:+:342:440	Sipa1l3:NM_001081028:chr7:-:449:547	uORF	0.207403	0.598428	0.346579
SIRT2:NM_001193286:chr19:-:341:376	Sirt2:NM_001122765:chr7:+:100:135	uORF	0.178477	0.31299	0.570232
SKIL:NM_001145098:chr3:+:1:87	Skil:NM_001039090:chr3:+:23:133	uORF	0.465928	1.91664	0.243096
SLC10A3:NM_001142391:chrX:-:169:219	Slc10a3:NM_001256104:chrX:-:207:257	uORF	0.257417	0.328272	0.784159
SLC10A7:NM_001029998:chr4:-:144:248	Slc10a7:NM_001009981:chr8:+:137:241	uORF	0.146008	0.290136	0.503239
SLC16A14:NM_152527:chr2:-:323:418	Slc16a14:NM_027921:chr1:-:102:197	uORF	0.33871	0.731594	0.462975
SLC1A3:NM_001166695:chr5:+:0:59	Slc1a3:NM_148938:chr15:-:406:528	uORF	0.318721	0.462854	0.688599
SLC1A3:NM_001166695:chr5:+:2:91	Slc1a3:NM_148938:chr15:-:438:554	uORF	0.438044	0.668558	0.655207
SLC1A3:NM_001166696:chr5:+:241:393	Slc1a3:NM_148938:chr15:-:348:431	uORF	0.482146	0.595808	0.80923
SLC1A3:NM_001166696:chr5:+:296:472	Slc1a3:NM_148938:chr15:-:438:554	uORF	0.427463	0.418373	1.02173
SLC20A1:NM_005415:chr2:+:303:380	Slc20a1:NM_001159593:chr2:+:250:330	uORF	0.0532042	0	NA
SLC20A2:NM_001257180:chr8:-:469:543	Slc20a2:NM_011394:chr8:+:265:339	uORF	0.151499	0.501002	0.302392
SLC20A2:NM_006749:chr8:-:261:506	Slc20a2:NM_011394:chr8:+:265:339	uORF	0.151499	0.501002	0.302392
SLC25A39:NM_001143780:chr17:-:85:132	Slc25a39:NM_026542:chr11:-:74:133	uORF	0.214651	0.970768	0.221115
SLC25A44:NM_014655:chr1:+:185:253	Slc25a44:NM_001145876:chr3:-:44:112	uORF	0.39645	0.132586	2.99014
SLC35A4:NM_080670:chr5:+:346:510	Slc35a4:NM_001083317:chr18:+:711:851	uORF	0.541549	0.338951	1.59772
SLC35A4:NM_080670:chr5:+:479:601	Slc35a4:NM_001083317:chr18:+:801:851	uORF	0.814521	0.85061	0.957574
SLC35A4:NM_080670:chr5:+:9:320	Slc35a4:NM_001083317:chr18:+:394:705	uORF	0.0517173	0.422933	0.122283
SLC35C2:NM_015945:chr20:-:93:131	Slc35c2:NM_001252573:chr2:-:142:180	uORF	0.230852	0.383875	0.601373
SLC37A4:NM_001164279:chr11:-:92:397	Slc37a4:NM_008063:chr9:+:126:224	uORF	0.404871	0.682062	0.593598
SLC38A10:NM_001037984:chr17:-:110:154	Slc38a10:NM_001164798:chr11:-:144:188	uORF	0.191993	0.572847	0.335155
SLC39A10:NM_020342:chr2:+:130:162	Slc39a10:NM_172653:chr1:-:15:47	uORF	0	0.217616	0
SLC39A9:NM_001252148:chr14:+:22:153	Slc39a9:NM_026244:chr12:+:12:143	uORF	0.0864277	0.268645	0.321717
SLC41A1:NM_173854:chr1:-:137:280	Slc41a1:NM_173865:chr1:+:295:483	uORF	0.789451	1.08179	0.729764
SLC41A1:NM_173854:chr1:-:501:566	Slc41a1:NM_173865:chr1:+:624:833	uORF	0.406385	0.728704	0.557682
SLC41A1:NM_173854:chr1:-:520:645	Slc41a1:NM_173865:chr1:+:547:753	uORF	0.594117	0.703477	0.844544
SLC41A1:NM_173854:chr1:-:687:791	Slc41a1:NM_173865:chr1:+:814:918	uORF	0.0923139	0.0981824	0.940228
SLC44A1:NM_080546:chr9:+:35:73	Slc44a1:NM_001159633:chr4:+:82:120	uORF	0.122324	0.414522	0.295096
SLC45A3:NM_033102:chr1:-:207:305	Slc45a3:NM_001177628:chr1:+:238:327	uORF	0.304256	0.726831	0.418606
SLC4A2:NM_001199692:chr7:+:980:1030	Slc4a2:NM_001253892:chr5:+:5:55	uORF	0.0266754	0.391204	0.0681882
SLC52A2:NM_001253815:chr8:+:124:183	Slc52a2:NM_029643:chr15:+:279:338	uORF	0.440123	0.904507	0.486589
SLC6A15:NM_001146335:chr12:-:179:304	Slc6a15:NM_175328:chr10:+:135:371	uORF	0.579367	0.933883	0.620384
SLC6A8:NM_001142805:chrX:+:45:92	Slc6a8:NM_001142809:chrX:+:414:461	uORF	0	0	NA
SLC9A1:NM_003047:chr1:-:11:361	Slc9a1:NM_016981:chr4:+:69:371	uORF	0.372885	0.445604	0.836809
SLMAP:NM_007159:chr3:+:13:57	Slmap:NM_032008:chr14:-:21:68	uORF	0.140597	0.098827	1.42266
SLX4:NM_032444:chr16:-:61:153	Slx4:NM_177472:chr16:-:35:127	uORF	0.201426	0.20839	0.966581
SMAD2:NM_001003652:chr18:-:168:395	Smad2:NM_010754:chr18:+:21:326	uORF	0.500443	0.792239	0.631682
SMAD2:NM_005901:chr18:-:72:287	Smad2:NM_010754:chr18:+:159:326	uORF	0.538084	2.06357	0.260755
SMAD4:NM_005359:chr18:+:425:514	Smad4:NM_008540:chr18:-:294:458	overlap.uORF	0.37692	0.135648	2.77866
SMAD5:NM_001001419:chr5:+:286:405	Smad5:NM_001164041:chr13:+:566:652	uORF	0.458596	0.476942	0.961535
SMAD5:NM_001001419:chr5:+:299:355	Smad5:NM_001164041:chr13:+:547:615	uORF	0.275685	1.43948	0.191516
SMAD6:NM_005585:chr15:+:322:465	Smad6:NM_008542:chr9:-:457:693	uORF	0.501842	0.958424	0.523611
SMAD7:NM_001190821:chr18:-:172:249	Smad7:NM_001042660:chr18:+:1038:1553	uORF	0	0	NA
SMARCA5:NM_003601:chr4:+:174:236	Smarca5:NM_053124:chr8:-:91:153	uORF	0.0504392	0.247109	0.204117
SMC6:NM_001142286:chr2:-:130:255	Smc6:NM_025695:chr12:+:155:445	overlap.uORF	0.787734	0.733711	1.07363
SMCR7L:NM_019008:chr22:+:187:399	Mief1:NM_178719:chr15:+:132:344	uORF	0.0702656	0.617769	0.113741
SMCR7L:NM_019008:chr22:+:83:142	Mief1:NM_178719:chr15:+:28:87	uORF	0.151846	0.167105	0.908687
SMEK2:NM_001122964:chr2:-:142:228	Smek2:NM_134034:chr11:+:22:255	uORF	0.305234	0.574378	0.531416
SMG5:NM_015327:chr1:-:28:120	Smg5:NM_178246:chr3:+:43:135	uORF	0.202072	0	NA
SMG7:NM_001174061:chr1:+:149:202	Smg7:NM_001005507:chr1:-:14:67	uORF	0.0290235	0.0657992	0.441092
SMURF1:NM_001199847:chr7:-:59:253	Smurf1:NM_001038627:chr5:-:72:191	uORF	0.529156	0.453042	1.16801
SMURF2:NM_022739:chr17:-:5:322	Smurf2:NM_025481:chr11:-:278:367	uORF	0.0706211	0.160711	0.439428
SNN:NM_003498:chr16:+:105:143	Snn:NM_009223:chr16:+:147:185	uORF	0.112294	1.90865	0.058834
SNRK:NM_001100594:chr3:+:74:220	Snrk:NM_001164572:chr9:+:52:198	uORF	0.150402	0.196496	0.765417
SNRK:NM_017719:chr3:+:74:193	Snrk:NM_001164572:chr9:+:52:198	uORF	0.215671	0.218524	0.986944
SNX10:NM_013322:chr7:+:81:212	Snx10:NM_001127349:chr6:+:16:147	uORF	0.372414	0.635045	0.586437
SNX13:NM_015132:chr7:-:25:183	Snx13:NM_001014973:chr12:+:23:181	uORF	0.0773961	0.0899066	0.860849
SNX16:NM_022133:chr8:-:436:462	Snx16:NM_001127191:chr3:-:241:267	uORF	0.0547801	1.16653	0.04696
SNX19:NM_014758:chr11:-:360:404	Snx19:NM_028874:chr9:+:49:108	uORF	0.331375	0.171194	1.93567
SOCS2:NM_001270467:chr12:+:274:402	Socs2:NM_007706:chr10:-:124:465	overlap.uORF	0.603766	1.83527	0.328979
SOCS2:NM_001270468:chr12:+:120:371	Socs2:NM_007706:chr10:-:124:465	overlap.uORF	0.458823	0.706496	0.649434
SOCS2:NM_001270469:chr12:+:196:369	Socs2:NM_007706:chr10:-:124:465	overlap.uORF	0.658685	1.55141	0.424573
SOCS2:NM_001270470:chr12:+:180:641	Socs2:NM_007706:chr10:-:124:465	overlap.uORF	0.643755	2.02152	0.31845
SOCS4:NM_080867:chr14:+:287:409	Socs4:NM_080843:chr14:+:20:142	uORF	0.145877	0.586886	0.248561
SOCS4:NM_199421:chr14:+:287:394	Socs4:NM_080843:chr14:+:20:142	uORF	0.86567	0.995509	0.869575
SOCS4:NM_199421:chr14:+:431:538	Socs4:NM_080843:chr14:+:20:142	uORF	0.428482	1.34314	0.319016
SOCS5:NM_144949:chr2:+:67:216	Socs5:NM_019654:chr17:+:61:108	uORF	0.142936	0.472449	0.302543
SOX4:NM_003107:chr6:+:170:316	Sox4:NM_009238:chr13:-:147:287	uORF	0.100399	0.219077	0.458282
SOX4:NM_003107:chr6:+:264:356	Sox4:NM_009238:chr13:-:91:294	uORF	0.341336	0.34302	0.995088
SOX4:NM_003107:chr6:+:512:763	Sox4:NM_009238:chr13:-:526:630	uORF	0.593904	1.15287	0.515151
SP3:NM_001172712:chr2:-:290:523	Sp3:NM_001018042:chr2:-:10:150	uORF	0.20046	0.302808	0.662004
SPHK2:NM_001204158:chr19:+:153:278	Sphk2:NM_203280:chr7:-:202:366	uORF	0.380566	0.629267	0.604777
SPIN1:NM_006717:chr9:+:238:279	Spin1:NM_001283028:chr13:+:258:299	uORF	0.32347	0.4729	0.684012
SPINT1:NM_001032367:chr15:+:9:83	Spint1:NM_016907:chr2:+:47:151	uORF	0.366858	0.642001	0.571429
SPOP:NM_001007226:chr17:-:179:340	Spop:NM_025287:chr11:+:70:126	uORF	0.104595	0	NA
SPOP:NM_001007227:chr17:-:179:265	Spop:NM_025287:chr11:+:70:126	uORF	0.134271	0.0790468	1.69863
SPOP:NM_001007228:chr17:-:179:235	Spop:NM_025287:chr11:+:70:126	uORF	0.077647	0	NA
SPOP:NM_001007229:chr17:-:179:244	Spop:NM_025287:chr11:+:70:126	uORF	0.118758	0.0393939	3.01462
SPRED1:NM_152594:chr15:+:205:327	Spred1:NM_001277256:chr2:+:518:646	uORF	0.131768	0.14791	0.890866
SPRED1:NM_152594:chr15:+:83:211	Spred1:NM_001277256:chr2:+:279:524	uORF	0.239071	0.210322	1.13669
SPRED1:NM_152594:chr15:+:90:194	Spred1:NM_001277256:chr2:+:421:507	uORF	0.137042	0.203015	0.675035
SPRED2:NM_181784:chr2:-:482:526	Spred2:NM_033523:chr11:+:436:480	uORF	0.0679996	0.203229	0.334595
SPRY2:NM_005842:chr13:-:166:348	Spry2:NM_011897:chr14:-:4:264	uORF	0.7876	1.30009	0.605802
SPRY4:NM_001127496:chr5:-:185:220	Spry4:NM_011898:chr18:-:72:107	uORF	0.0425864	0.122541	0.347529
SPRY4:NM_030964:chr5:-:185:241	Spry4:NM_011898:chr18:-:72:107	uORF	0.161009	0.192241	0.837536
SPSB1:NM_025106:chr1:+:292:324	Spsb1:NM_029035:chr4:-:256:288	uORF	0.0871414	0.474303	0.183725
SQLE:NM_003129:chr8:+:757:867	Sqle:NM_009270:chr15:+:565:660	uORF	0.819979	0.984127	0.833205
SREK1:NM_001270492:chr5:+:159:557	Srek1:NM_172592:chr13:-:144:266	uORF	0.137572	0.0545568	2.52163
SREK1:NM_139168:chr5:+:311:586	Srek1:NM_172592:chr13:-:144:266	uORF	0.132725	0.0346011	3.83588
SRF:NM_003131:chr6:+:409:444	Srf:NM_020493:chr17:-:273:302	uORF	0	0.553199	0
SRGAP3:NM_001033117:chr3:-:117:356	Srgap3:NM_080448:chr6:-:119:265	uORF	0.156483	0.212709	0.735668
SRP54:NM_001146282:chr14:+:195:329	Srp54a:NM_011899:chr12:+:103:282	overlap.uORF	0.287022	0.386258	0.743083
SRSF5:NM_001039465:chr14:+:192:278	Srsf5:NM_001079695:chr12:+:217:288	uORF	0.346127	0.424681	0.81503
SRSF5:NM_006925:chr14:+:58:144	Srsf5:NM_001079695:chr12:+:3:293	uORF	0.646592	0.716772	0.902089
SSBP3:NM_001009955:chr1:-:190:219	Ssbp3:NM_023672:chr4:+:191:220	uORF	0	0	NA
SSTR1:NM_001049:chr14:+:185:331	Sstr1:NM_009216:chr12:+:59:136	uORF	0.444581	0.270053	1.64627
SSTR1:NM_001049:chr14:+:360:461	Sstr1:NM_009216:chr12:+:9:326	uORF	0.328955	0.420212	0.782832
ST3GAL1:NM_003033:chr8:-:395:442	St3gal1:NM_009177:chr15:-:379:420	uORF	0.260057	0.164337	1.58246
ST3GAL2:NM_006927:chr16:-:109:138	St3gal2:NM_009179:chr8:+:210:239	uORF	0.0517447	0.35968	0.143863
ST3GAL2:NM_006927:chr16:-:721:888	St3gal2:NM_009179:chr8:+:783:950	uORF	0.143227	0.299739	0.477838
ST3GAL3:NM_001270459:chr1:+:17:169	St3gal3:NM_001161774:chr4:-:4:231	uORF	0.633883	0.970561	0.65311
ST3GAL4:NM_001254757:chr11:+:217:252	St3gal4:NM_009178:chr9:-:132:167	uORF	0.18202	0.132209	1.37676
ST5:NM_005418:chr11:-:276:329	St5:NM_001001326:chr7:-:16:57	uORF	0.174732	0.672932	0.259658
ST6GALNAC4:NM_175039:chr9:-:42:146	St6galnac4:NM_001276425:chr2:+:94:225	uORF	0.508139	0.99574	0.510313
ST6GALNAC5:NM_030965:chr1:+:103:147	St6galnac5:NM_012028:chr3:-:118:162	uORF	0.0995213	0.392789	0.253371
STAG2:NM_001042749:chrX:+:140:259	Stag2:NM_001077712:chrX:+:171:350	uORF	0.48624	0.723725	0.671857
STAG2:NM_001042749:chrX:+:358:396	Stag2:NM_001077712:chrX:+:324:350	uORF	0.0551804	0.22206	0.248493
STAG2:NM_006603:chrX:+:111:197	Stag2:NM_021465:chrX:+:93:149	uORF	0.338729	0.77913	0.434753
STAMBPL1:NM_020799:chr10:+:372:452	Stambpl1:NM_029682:chr19:+:246:329	uORF	0.340048	0.494611	0.687506
STAT3:NM_139276:chr17:-:11:229	Stat3:NM_011486:chr11:-:17:169	uORF	0.371767	0.642343	0.578766
STAU2:NM_001164380:chr8:-:185:304	Stau2:NM_001111272:chr1:-:94:162	uORF	0.771602	0.505883	1.52526
STC2:NM_003714:chr5:-:1118:1153	Stc2:NM_011491:chr11:-:18:53	uORF	0.0437183	0	NA
STIM1:NM_003156:chr11:+:409:552	Stim1:NM_009287:chr7:+:498:575	uORF	0.203979	0.247004	0.825813
STK16:NM_001008910:chr2:+:54:137	Stk16:NM_001277992:chr1:+:197:265	uORF	0.182198	0.207606	0.877616
STRBP:NM_001171137:chr9:-:210:308	Strbp:NM_009261:chr2:-:72:170	overlap.uORF	0.0545361	0.16778	0.325045
STRN3:NM_001083893:chr14:-:41:70	Strn3:NM_001172098:chr12:-:36:65	uORF	0	0.143291	0
STX17:NM_017919:chr9:+:6:134	Stx17:NM_026343:chr4:+:5:82	uORF	0.50677	0.431959	1.17319
STX4:NM_004604:chr16:+:67:153	Stx4a:NM_009294:chr7:+:81:185	uORF	0.402335	0.307562	1.30814
SUCO:NM_014283:chr1:+:132:203	Suco:NM_172645:chr1:-:105:377	overlap.uORF	0.325443	0.38914	0.836313
SULF1:NM_001128204:chr8:+:378:467	Sulf1:NM_001198565:chr1:+:306:395	uORF	0.170558	0.154791	1.10186
SULF1:NM_001128205:chr8:+:208:309	Sulf1:NM_172294:chr1:+:123:170	uORF	0.208306	0.822552	0.253243
SUMO1:NM_001005781:chr2:-:42:134	Sumo1:NM_009460:chr1:-:29:130	uORF	0.239484	0.400915	0.597343
SUMO2:NM_001005849:chr17:-:78:137	Sumo2:NM_133354:chr11:-:30:80	uORF	0.131708	0.234726	0.561112
SYTL2:NM_001162952:chr11:-:301:396	Sytl2:NM_001040087:chr7:+:322:417	uORF	0.108896	0.0885766	1.2294
SYTL2:NM_206929:chr11:-:114:182	Sytl2:NM_001040087:chr7:+:322:417	uORF	0.399572	0.459246	0.870062
TAF12:NM_001135218:chr1:-:442:501	Taf12:NM_025579:chr4:+:117:176	uORF	0.0984852	0.0770316	1.2785
TAF4B:NM_005640:chr18:+:382:477	Taf4b:NM_001100449:chr18:+:245:337	uORF	0.357773	0.206008	1.73669
TANC1:NM_001145909:chr2:+:109:243	Tanc1:NM_198294:chr2:+:26:196	uORF	0.417743	0.422578	0.988558
TAOK2:NM_001252043:chr16:+:229:768	Taok2:NM_001163774:chr7:-:424:1137	overlap.uORF	0.612985	1.49714	0.409438
TAOK3:NM_016281:chr12:-:89:331	Taok3:NM_001199685:chr5:+:5:169	uORF	0.356641	0.728884	0.489298
TBC1D14:NM_001113363:chr4:+:145:171	Tbc1d14:NM_001113364:chr5:-:159:185	uORF	0.0591645	0.174519	0.339015
TBL1XR1:NM_024665:chr3:-:184:258	Tbl1xr1:NM_030732:chr3:+:356:412	uORF	0.0226177	0	NA
TBL1XR1:NM_024665:chr3:-:213:248	Tbl1xr1:NM_030732:chr3:+:367:402	uORF	0.039133	0	NA
TBPL1:NM_004865:chr6:+:141:269	Tbpl1:NM_011603:chr10:-:210:338	uORF	0.116396	0.206438	0.563831
TBX3:NM_005996:chr12:-:553:654	Tbx3:NM_011535:chr5:+:94:492	uORF	0.306749	0.255386	1.20112
TEN1:NM_001113324:chr17:+:64:207	Ten1:NM_027107:chr11:+:32:172	uORF	0.676355	0.647601	1.0444
TESK1:NM_006285:chr9:+:265:309	Tesk1:NM_011571:chr4:+:1087:1131	uORF	0	0.812148	0
TEX2:NM_018469:chr17:-:103:132	Tex2:NM_198292:chr11:-:50:79	uORF	0.0504231	0.172369	0.292529
TFDP2:NM_001178138:chr3:-:454:642	Tfdp2:NM_001184706:chr9:+:434:520	uORF	0.0960648	0.124327	0.77268
TFPT:NM_013342:chr19:-:83:313	Tfpt:NM_023524:chr7:-:5:151	uORF	0.40455	0.358937	1.12708
TJAP1:NM_001146018:chr6:+:80:268	Tjap1:NM_028751:chr17:-:43:435	overlap.uORF	0.349412	0.219928	1.58876
TJAP1:NM_080604:chr6:+:80:376	Tjap1:NM_028751:chr17:-:43:435	overlap.uORF	0.539357	0.569265	0.947461
TLE3:NM_001105192:chr15:-:785:862	Tle3:NM_001083927:chr9:+:755:835	uORF	0.202538	0.387541	0.522624
TMEM106B:NM_018374:chr7:+:40:231	Tmem106b:NM_027992:chr6:+:53:208	uORF	0.390252	0.48314	0.807741
TMEM116:NM_001193453:chr12:-:144:263	Tmem116:NM_029912:chr5:+:19:132	uORF	0.398269	0.381265	1.0446
TMEM158:NM_015444:chr3:-:249:278	Tmem158:NM_001002267:chr9:-:198:227	uORF	0.0529087	0.333716	0.158544
TMEM159:NM_020422:chr16:+:279:338	Tmem159:NM_145586:chr7:+:112:174	uORF	0.578128	0.424561	1.36171
TMEM164:NM_032227:chrX:+:56:154	Tmem164:NM_001199360:chrX:+:4:354	uORF	0.24683	0.346002	0.713378
TMEM180:NM_024789:chr10:+:152:202	Tmem180:NM_029186:chr19:+:113:163	uORF	0.297526	0.663451	0.448452
TMEM204:NM_001256541:chr16:+:47:223	Tmem204:NM_001001183:chr17:-:306:371	uORF	0.165046	0.673456	0.245074
TMEM204:NM_024600:chr16:+:271:444	Tmem204:NM_001001183:chr17:-:306:371	uORF	0.165046	0.673456	0.245074
TMEM39A:NM_018266:chr3:-:35:151	Tmem39a:NM_001205287:chr16:+:79:225	uORF	0.597994	1.28125	0.466725
TMEM48:NM_001168551:chr1:-:145:276	Ndc1:NM_028355:chr4:+:102:284	uORF	0.312002	0.550311	0.566955
TMEM68:NM_152417:chr8:-:124:165	Tmem68:NM_028097:chr4:-:135:176	uORF	0.100401	0.624916	0.160663
TMSB10:NM_021103:chr2:+:22:90	Tmsb10:NM_001190327:chr6:-:41:226	uORF	0.257236	0.390525	0.658693
TNFAIP1:NM_021137:chr17:+:345:380	Tnfaip1:NM_001159392:chr11:-:186:221	uORF	0.156701	0.208224	0.752562
TNFRSF1A:NM_001065:chr12:-:162:293	Tnfrsf1a:NM_011609:chr6:+:207:407	overlap.uORF	0.703226	0.70803	0.993215
TNFRSF21:NM_014452:chr6:-:102:248	Tnfrsf21:NM_178589:chr17:+:96:242	uORF	0.143024	0.373768	0.382656
TNIP1:NM_001252385:chr5:-:76:231	Tnip1:NM_001199275:chr11:-:227:292	uORF	0.396983	0.979351	0.405353
TNPO3:NM_001191028:chr7:-:285:323	Tnpo3:NM_177296:chr6:-:3:41	uORF	0.0377347	0.122819	0.307238
TNRC6A:NM_014494:chr16:+:9:62	Tnrc6a:NM_144925:chr7:+:338:391	uORF	0.0295088	0	NA
TNRC6B:NM_001162501:chr22:+:65:94	Tnrc6b:NM_177124:chr15:+:45:74	uORF	0	0	NA
TNS3:NM_022748:chr7:-:198:236	Tns3:NM_001083587:chr11:-:161:199	uORF	0.0364402	0.309553	0.117719
TOB1:NM_001243877:chr17:-:300:332	Tob1:NM_009427:chr11:+:0:329	uORF	0.0470888	0.135076	0.348609
TOMM40L:NM_032174:chr1:+:109:180	Tomm40l:NM_001037170:chr1:-:167:214	uORF	0.174334	0.174334	1
TOMM40L:NM_032174:chr1:+:27:89	Tomm40l:NM_001037170:chr1:-:13:108	uORF	0.153492	0.0671474	2.28589
TOR1AIP1:NM_001267578:chr1:+:151:351	Tor1aip1:NM_001160018:chr1:-:66:143	uORF	0.135293	0.336198	0.402422
TOR1AIP2:NM_001199260:chr1:-:421:555	Tor1aip2:NM_001160180:chr1:+:339:536	uORF	0.605317	1.03698	0.58373
TOR1AIP2:NM_001199260:chr1:-:679:711	Tor1aip2:NM_172843:chr1:+:819:878	uORF	0.193902	0.38899	0.498476
TOR1AIP2:NM_001199260:chr1:-:699:773	Tor1aip2:NM_172843:chr1:+:866:940	uORF	0.180731	0.405542	0.445652
TOR1AIP2:NM_022347:chr1:-:692:742	Tor1aip2:NM_001160180:chr1:+:608:658	uORF	0.0851826	0.213972	0.398102
TP53INP1:NM_001135733:chr8:-:74:268	Trp53inp1:NM_001199105:chr4:+:94:141	uORF	0.153947	0.344649	0.446678
TPCN1:NM_001143819:chr12:+:268:369	Tpcn1:NM_145853:chr5:-:121:222	uORF	0.242844	0.471529	0.515014
TPST1:NM_003596:chr7:+:211:330	Tpst1:NM_001130476:chr5:+:252:371	uORF	0.378405	0.5861	0.645633
TPST2:NM_001008566:chr22:-:234:290	Tpst2:NM_009419:chr5:+:118:171	overlap.uORF	0.341151	0.466773	0.730871
TRAF3:NM_001199427:chr14:+:107:169	Traf3:NM_001286122:chr12:+:145:207	uORF	0.154961	0.126807	1.22202
TRAF3IP2:NM_001164281:chr6:-:260:505	Traf3ip2:NM_134000:chr10:+:263:340	uORF	0.245604	0.423356	0.580137
TRAK2:NM_015049:chr2:-:231:308	Trak2:NM_172406:chr1:-:212:277	uORF	0.48608	0.680889	0.71389
TRAM1:NM_014294:chr8:-:123:200	Tram1:NM_028173:chr1:-:3:80	uORF	0.0367685	0.174583	0.210608
TRERF1:NM_033502:chr6:-:237:455	Trerf1:NM_001097623:chr17:+:294:515	uORF	0.219571	0.342991	0.640166
TRERF1:NM_033502:chr6:-:84:164	Trerf1:NM_001097623:chr17:+:41:217	uORF	0.286443	0.322614	0.887883
TRIB1:NM_025195:chr8:+:172:243	Trib1:NM_144549:chr15:+:141:266	uORF	0.310128	0.527938	0.587433
TRIM41:NM_033549:chr5:+:76:246	Trim41:NM_145377:chr11:-:75:239	uORF	0.386654	0.648615	0.596123
TRIP11:NM_004239:chr14:-:29:85	Trip11:NM_028446:chr12:-:54:110	uORF	0.104351	0.173089	0.602873
TRIQK:NM_001171798:chr8:-:55:171	Triqk:NM_001171801:chr4:+:20:100	uORF	0.360109	0.733346	0.49105
TRPM7:NM_017672:chr15:-:63:101	Trpm7:NM_001164325:chr2:-:69:107	uORF	0.037799	0.122141	0.309472
TRPS1:NM_014112:chr8:-:391:522	Trps1:NM_032000:chr15:-:372:467	overlap.uORF	0.2777	0.243341	1.1412
TSC1:NM_000368:chr9:-:28:60	Tsc1:NM_001289575:chr2:+:24:56	uORF	0	0	NA
TSC1:NM_000368:chr9:-:96:161	Tsc1:NM_001289575:chr2:+:92:157	uORF	0.0911388	0.3916	0.232735
TSC22D4:NM_030935:chr7:-:623:694	Tsc22d4:NM_023910:chr5:+:582:653	uORF	0.0194326	0.202973	0.0957398
TSHZ1:NM_005786:chr18:+:74:94	Tshz1:NM_001081300:chr18:-:129:149	uORF	0	0	NA
TSPAN17:NM_001006616:chr5:+:116:139	Tspan17:NM_028841:chr13:+:78:101	uORF	0	0.604381	0
TTC7A:NM_020458:chr2:+:208:351	Ttc7:NM_028639:chr17:+:136:321	uORF	0.250742	0.128068	1.95788
TTLL4:NM_014640:chr2:+:289:357	Ttll4:NM_001014974:chr1:+:319:384	uORF	0.164044	0.0674985	2.43033
TTLL5:NM_015072:chr14:+:171:251	Ttll5:NM_001081423:chr12:+:128:211	uORF	0.0911757	0.169638	0.537471
TTYH3:NM_025250:chr7:+:81:116	Ttyh3:NM_175274:chr5:-:109:144	uORF	0.192392	0.414051	0.464657
TUBG2:NM_016437:chr17:+:64:213	Tubg2:NM_134028:chr11:+:42:191	uORF	0.263623	0.310715	0.848442
UBA1:NM_003334:chrX:+:30:185	Uba1:NM_001136085:chrX:+:65:178	uORF	0.261214	0.45186	0.578086
UBAP2L:NM_014847:chr1:+:112:141	Ubap2l:NM_001165984:chr3:-:46:75	uORF	0.0501727	0	NA
UBE2D3:NM_181887:chr4:-:21:311	Ube2d3:NM_025356:chr3:+:3:209	uORF	0.500336	0.590582	0.847192
UBE2D3:NM_181887:chr4:-:34:105	Ube2d3:NM_025356:chr3:+:16:168	uORF	0.0204465	0.05334	0.383324
UBE2D3:NM_181891:chr4:-:123:152	Ube2d3:NM_025356:chr3:+:104:133	uORF	0.0579113	0	NA
UBE2E3:NM_006357:chr2:+:200:373	Ube2e3:NM_009454:chr2:+:201:326	uORF	0.487636	0.817886	0.596215
UBE2I:NM_194260:chr16:+:53:262	Ube2i:NM_001177609:chr17:-:71:202	uORF	0.396738	0.515414	0.769746
UBE2K:NM_001111112:chr4:+:101:157	Ube2k:NM_016786:chr5:+:12:128	uORF	0.404816	0.415895	0.973362
UBE3B:NM_001270449:chr12:+:28:87	Ube3b:NM_054093:chr5:+:148:300	uORF	0.273313	0.192039	1.42322
UBL3:NM_007106:chr13:-:369:413	Ubl3:NM_011908:chr5:-:171:215	uORF	0.141008	0.505125	0.279154
UBL3:NM_007106:chr13:-:510:566	Ubl3:NM_011908:chr5:-:288:344	uORF	0.183901	0.291837	0.630151
UBL3:NM_007106:chr13:-:671:757	Ubl3:NM_011908:chr5:-:384:458	uORF	0.192099	0.259738	0.739586
UBL3:NM_007106:chr13:-:816:881	Ubl3:NM_011908:chr5:-:517:582	uORF	0.0878557	0.0710486	1.23656
UBTF:NM_001076683:chr17:-:33:158	Ubtf:NM_011551:chr11:-:4:234	uORF	0.1583	0.330425	0.479078
UBXN2A:NM_181713:chr2:+:29:145	Ubxn2a:NM_145441:chr12:-:43:150	uORF	0.411337	0.835491	0.49233
UCP2:NM_003355:chr11:-:134:244	Ucp2:NM_011671:chr7:+:132:242	uORF	0.0740749	0.143739	0.515343
UGDH:NM_001184700:chr4:-:98:283	Ugdh:NM_009466:chr5:-:56:397	overlap.uORF	0.629332	1.36691	0.460404
UGP2:NM_006759:chr2:+:212:304	Ugp2:NM_139297:chr11:-:587:637	uORF	0.332674	1.01591	0.327464
UHRF1BP1L:NM_001006947:chr12:-:4:147	Uhrf1bp1l:NM_029166:chr10:+:91:171	uORF	0.438173	0.700259	0.625731
UNC13B:NM_006377:chr9:+:44:121	Unc13b:NM_001081413:chr4:+:28:105	uORF	0.337237	0.382978	0.880566
UPF2:NM_015542:chr10:-:67:105	Upf2:NM_001081132:chr2:+:65:103	uORF	0.0381666	0.259175	0.147262
URI1:NM_003796:chr19:+:131:292	Uri1:NM_011274:chr7:-:142:315	uORF	0.228909	0.528114	0.433446
USF1:NM_007122:chr1:-:40:198	Usf1:NM_009480:chr1:+:43:270	overlap.uORF	0.488885	0.697191	0.701221
USP21:NM_001014443:chr1:+:60:164	Usp21:NM_013919:chr1:-:45:149	uORF	0.167154	0.154867	1.07934
USP32:NM_032582:chr17:-:103:159	Usp32:NM_001029934:chr11:-:10:66	uORF	0.0782524	0.0772221	1.01334
USP32:NM_032582:chr17:-:153:278	Usp32:NM_001029934:chr11:-:0:179	uORF	0.130649	0.0620205	2.10655
USP37:NM_020935:chr2:-:225:311	Usp37:NM_176972:chr1:-:207:293	uORF	0.28132	0.219039	1.28434
USP53:NM_019050:chr4:+:554:619	Usp53:NM_133857:chr3:-:194:304	uORF	0.687616	0.483469	1.42226
USP53:NM_019050:chr4:+:929:1021	Usp53:NM_133857:chr3:-:544:642	uORF	0.428241	0.784656	0.545768
USP6NL:NM_014688:chr10:-:113:136	Usp6nl:NM_001080548:chr2:+:99:122	uORF	0	0	NA
USP9X:NM_001039590:chrX:+:483:596	Usp9x:NM_009481:chrX:+:244:357	uORF	0.0589404	0.0933247	0.631563
VAC14:NM_018052:chr16:-:154:228	Vac14:NM_146216:chr8:+:138:212	uORF	0.242057	0.18601	1.30131
VCPIP1:NM_025054:chr8:-:151:216	Vcpip1:NM_173443:chr1:-:6:278	overlap.uORF	0.463528	0.387633	1.19579
VCPIP1:NM_025054:chr8:-:36:83	Vcpip1:NM_173443:chr1:-:11:58	uORF	0.0318239	0	NA
VEGFA:NM_001025366:chr6:+:37:147	Vegfa:NM_001025250:chr17:-:25:150	uORF	0.633593	0.402988	1.57224
VEZF1:NM_007146:chr17:-:21:89	Vezf1:NM_016686:chr11:+:0:68	uORF	0.02106	0.0582355	0.361636
VPS18:NM_020857:chr15:+:26:196	Vps18:NM_172269:chr2:+:22:258	uORF	0.50236	0.839983	0.598059
VSNL1:NM_003385:chr2:+:329:358	Vsnl1:NM_012038:chr12:-:234:272	uORF	0.0485705	0	NA
WAPAL:NM_015045:chr10:-:43:87	Wapal:NM_001004436:chr14:+:34:78	uORF	0.0305602	0	NA
WAPAL:NM_015045:chr10:-:54:191	Wapal:NM_001004436:chr14:+:45:137	uORF	0.0410872	0.0970146	0.423516
WBP1:NM_012477:chr2:+:102:194	Wbp1:NM_001083922:chr6:-:71:181	uORF	0.0485778	0.170545	0.284838
WDR13:NM_017883:chrX:+:214:420	Wdr13:NM_026137:chrX:-:352:468	uORF	0.360298	0.262177	1.37425
WDR33:NM_001006622:chr2:-:47:79	Wdr33:NM_001170966:chr18:+:26:97	uORF	0.142054	0.37209	0.381774
WDR44:NM_001184965:chrX:+:350:430	Wdr44:NM_175180:chrX:+:220:345	uORF	0.160881	0.260086	0.618569
WHSC1L1:NM_017778:chr8:-:458:499	Whsc1l1:NM_001001735:chr8:+:415:456	uORF	0.0315926	0	NA
WHSC1L1:NM_017778:chr8:-:7:348	Whsc1l1:NM_001001735:chr8:+:39:305	uORF	0.389595	0.553392	0.704013
WIPI2:NM_001033518:chr7:+:75:149	Wipi2:NM_178398:chr5:+:15:89	uORF	0.345033	0.215243	1.60299
WNK1:NM_001184985:chr12:+:300:377	Wnk1:NM_001185020:chr6:-:672:749	uORF	0.0817637	0.194347	0.42071
WNT5A:NM_001256105:chr3:-:30:86	Wnt5a:NM_001256224:chr14:+:2:37	uORF	0.212522	0.578127	0.367604
WRNIP1:NM_020135:chr6:+:40:114	Wrnip1:NM_030215:chr13:+:67:141	uORF	0.210114	0.198987	1.05592
WSB2:NM_018639:chr12:-:32:58	Wsb2:NM_021539:chr5:+:95:121	uORF	0.121797	0.181281	0.671866
WWP1:NM_007013:chr8:+:185:259	Wwp1:NM_001276292:chr4:-:186:272	uORF	0.241078	0.54464	0.442636
WWP1:NM_007013:chr8:+:67:93	Wwp1:NM_001276292:chr4:-:88:114	uORF	0	0.467789	0
XPOT:NM_007235:chr12:+:432:497	Xpot:NM_001081056:chr10:-:209:277	uORF	0.403086	0.33696	1.19624
XPR1:NM_001135669:chr1:+:12:50	Xpr1:NM_011273:chr1:-:27:65	uORF	0.0368483	0.133277	0.276479
YIPF4:NM_032312:chr2:+:24:92	Yipf4:NM_026417:chr17:+:15:428	overlap.uORF	0.314709	0.105289	2.98901
YLPM1:NM_019589:chr14:+:64:87	Ylpm1:NM_178363:chr12:+:85:132	uORF	0	0	NA
YWHAZ:NM_145690:chr8:-:18:86	Ywhaz:NM_011740:chr15:-:381:476	uORF	0	0.0461575	0
YWHAZ:NM_145690:chr8:-:70:93	Ywhaz:NM_011740:chr15:-:442:483	uORF	0	0	NA
ZBTB17:NM_001242884:chr1:-:143:235	Zbtb17:NM_009541:chr4:+:123:215	uORF	0.263347	0.330321	0.797244
ZBTB37:NM_001122770:chr1:+:181:255	Zbtb37:NM_173424:chr1:-:106:180	uORF	0.0183617	0.0617522	0.297346
ZBTB37:NM_032522:chr1:+:181:252	Zbtb37:NM_173424:chr1:-:106:180	uORF	0.0192825	0.063316	0.304543
ZBTB38:NM_001080412:chr3:+:843:926	Zbtb38:NM_175537:chr9:-:392:433	uORF	0.180064	0	NA
ZBTB38:NM_001080412:chr3:+:923:976	Zbtb38:NM_175537:chr9:-:387:482	uORF	0.391363	1.14853	0.340752
ZC3H10:NM_032786:chr12:+:85:126	Zc3h10:NM_134003:chr10:-:63:104	uORF	0.0332832	0.13163	0.252853
ZC3H11A:NM_014827:chr1:+:139:327	Zbed6:NM_001166552:chr1:-:52:306	uORF	0.631902	1.086	0.581861
ZC3H11A:NM_014827:chr1:+:359:469	Zc3h11a:NM_001276767:chr1:-:153:236	uORF	0.0186931	0	NA
ZC3H7B:NM_017590:chr22:+:15:98	Zc3h7b:NM_001081016:chr15:+:304:387	uORF	0.0171842	0.0962656	0.178508
ZC3H7B:NM_017590:chr22:+:79:102	Zc3h7b:NM_001081016:chr15:+:368:391	uORF	0	0	NA
ZCCHC11:NM_001009881:chr1:-:42:143	Zcchc11:NM_175472:chr4:+:256:381	uORF	0.0939835	0.181106	0.518941
ZDHHC14:NM_024630:chr6:+:72:377	Zdhhc14:NM_146073:chr17:+:653:727	uORF	0.102264	0.170237	0.600719
ZDHHC16:NM_032327:chr10:+:12:80	Zdhhc16:NM_023740:chr19:+:25:162	uORF	0.166517	0.245228	0.67903
ZDHHC3:NM_001135179:chr3:-:250:270	Zdhhc3:NM_026917:chr9:-:210:230	uORF	0	0	NA
ZDHHC4:NM_001134387:chr7:+:312:419	Zdhhc4:NM_028379:chr5:-:87:221	uORF	0.489447	0.912847	0.536176
ZDHHC5:NM_015457:chr11:+:11:199	Zdhhc5:NM_144887:chr2:-:65:292	uORF	0.233992	0.28069	0.833632
ZDHHC5:NM_015457:chr11:+:253:306	Zdhhc5:NM_144887:chr2:-:65:292	uORF	0.133068	0.0868423	1.53229
ZDHHC5:NM_015457:chr11:+:369:434	Zdhhc5:NM_144887:chr2:-:352:420	uORF	0.154998	0	NA
ZDHHC5:NM_015457:chr11:+:883:996	Zdhhc5:NM_144887:chr2:-:864:977	uORF	0.0997548	0.228841	0.435914
ZDHHC5:NM_015457:chr11:+:939:1091	Zdhhc5:NM_144887:chr2:-:920:1015	uORF	0.119864	0.160334	0.747586
ZDHHC6:NM_022494:chr10:-:318:401	Zdhhc6:NM_001033573:chr19:-:455:532	uORF	0.275343	0.165662	1.66208
ZDHHC7:NM_001145548:chr16:-:156:263	Zdhhc7:NM_133967:chr8:-:302:451	uORF	0.203404	0.442033	0.460155
ZDHHC7:NM_001145548:chr16:-:270:314	Zdhhc7:NM_133967:chr8:-:401:451	uORF	0.4314	2.16997	0.198805
ZDHHC9:NM_001008222:chrX:-:347:427	Zdhhc9:NM_172465:chrX:-:234:311	uORF	0.289369	0.0495589	5.83888
ZFAND4:NM_174890:chr10:-:387:671	Zfand4:NM_001081317:chr6:+:93:194	overlap.uORF	0.193076	0.139079	1.38825
ZFAND6:NM_001242913:chr15:+:115:156	Zfand6:NM_022985:chr7:-:44:76	uORF	0.045111	0.15457	0.291847
ZFHX3:NM_006885:chr16:-:409:651	Zfhx3:NM_007496:chr8:+:469:711	uORF	0.186403	0.147172	1.26656
ZFP161:NM_001143823:chr18:-:386:478	Zbtb14:NM_009547:chr17:+:11:316	uORF	0.420041	0.42442	0.989682
ZFP161:NM_003409:chr18:-:377:448	Zbtb14:NM_009547:chr17:+:11:316	uORF	0.218558	0.134386	1.62635
ZFYVE26:NM_015346:chr14:-:13:99	Zfyve26:NM_001008550:chr12:-:14:118	uORF	0.275403	0.565763	0.486781
ZHX1:NM_001017926:chr8:-:459:554	Zhx1:NM_001042438:chr15:-:442:648	uORF	0.105844	0.367262	0.288196
ZHX1:NM_001017926:chr8:-:562:636	Zhx1:NM_009572:chr15:-:456:617	uORF	0.137314	0.134772	1.01886
ZHX2:NM_014943:chr8:+:131:403	Zhx2:NM_199449:chr15:+:151:528	uORF	0.223433	0.254162	0.879098
ZKSCAN1:NM_003439:chr7:+:10:171	Zkscan1:NM_029869:chr5:+:28:162	uORF	0.667666	0.790113	0.845025
ZMIZ2:NM_031449:chr7:+:3:107	Zmiz2:NM_028601:chr11:+:95:265	uORF	0.434907	0.759832	0.572372
ZMPSTE24:NM_005857:chr1:+:90:161	Zmpste24:NM_172700:chr4:-:17:241	uORF	0.365096	0.88122	0.414308
ZNF148:NM_021964:chr3:-:215:319	Zfp148:NM_011749:chr16:+:49:354	uORF	0.736547	0.795507	0.925884
ZNF148:NM_021964:chr3:-:304:357	Zfp148:NM_011749:chr16:+:305:358	uORF	0.247006	0.434604	0.568347
ZNF148:NM_021964:chr3:-:384:443	Zfp148:NM_011749:chr16:+:406:444	uORF	0.0758653	0.131656	0.576237
ZNF180:NM_013256:chr19:-:86:163	Zfp180:NM_001045486:chr7:+:183:263	uORF	0.758136	1.01822	0.744568
ZNF213:NM_001134655:chr16:+:327:368	Zfp213:NM_001033496:chr17:-:272:313	uORF	0.269209	0.454816	0.591908
ZNF266:NM_001271314:chr19:-:582:812	Zfp266:NM_001082485:chr9:-:405:542	overlap.uORF	0.592783	1.52848	0.387824
ZNF266:NM_006631:chr19:-:674:859	Zfp266:NM_001082485:chr9:-:405:542	overlap.uORF	0.565804	1.38737	0.407826
ZNF280D:NM_001002844:chr15:-:151:210	Zfp280d:NM_146224:chr9:+:162:209	overlap.uORF	0.256512	0.287214	0.893103
ZNF335:NM_022095:chr20:-:18:77	Zfp335:NM_199027:chr2:-:179:238	uORF	0.186771	0.479033	0.389891
ZNF410:NM_001242924:chr14:+:365:397	Zfp410:NM_001252582:chr12:+:415:441	uORF	0.112367	0.601531	0.186801
ZNF420:NM_144689:chr19:+:108:209	Zfp420:NM_172740:chr7:+:62:166	uORF	0.757525	1.5738	0.481335
ZNF561:NM_152289:chr19:-:107:139	Zfp266:NM_001082485:chr9:-:371:403	uORF	0.0439487	0.170033	0.258471
ZNF562:NM_001130031:chr19:-:114:146	Zfp266:NM_001082485:chr9:-:371:403	uORF	0.0894095	0.179276	0.498725
ZNF573:NM_152360:chr19:-:69:446	Gm5113:NM_001033540:chr7:+:265:438	uORF	0.867592	1.64772	0.526539
ZNF592:NM_014630:chr15:+:99:173	Zfp592:NM_178707:chr7:+:100:171	uORF	0.0838683	0	NA
ZNF597:NM_152457:chr16:-:17:160	Zfp597:NM_001033159:chr16:-:7:123	uORF	0.360466	0.629228	0.572871
ZNF638:NM_001014972:chr2:+:167:244	Zfml:NM_001166371:chr6:+:183:260	uORF	0.0710561	0.0652683	1.08868
ZNF638:NM_001014972:chr2:+:245:289	Zfml:NM_001166371:chr6:+:261:305	uORF	0.0621494	0	NA
ZNF664-FAM101A:NM_001204299:chr12:+:182:244	Zfp664:NM_001081750:chr5:+:264:302	uORF	0.263548	0.263548	1
ZNF664:NM_001204298:chr12:+:319:474	Zfp664:NM_001081750:chr5:+:98:451	uORF	0.523071	1.1626	0.449915
ZNF664:NM_001204298:chr12:+:677:757	Zfp664:NM_001081750:chr5:+:687:770	uORF	0.307113	1.99087	0.154261
ZNF664:NM_001204298:chr12:+:786:872	Zfp664:NM_001081750:chr5:+:799:885	uORF	0.10859	0.531224	0.204414
ZNF668:NM_024706:chr16:-:312:377	Zfp668:NM_146259:chr7:-:363:692	uORF	0.47523	0.863773	0.550179
ZNF689:NM_138447:chr16:-:10:150	Zfp689:NM_175163:chr7:-:44:184	uORF	0.085512	0.229926	0.371912
ZNF740:NM_001004304:chr12:+:141:233	Zfp740:NM_001289691:chr15:+:85:312	uORF	0.358068	0.468961	0.763535
ZNF746:NM_001163474:chr7:-:67:93	Zfp746:NM_001163475:chr6:-:50:76	uORF	0.0574324	0	NA
ZNF76:NM_003427:chr6:+:21:116	Zfp523:NM_172617:chr17:+:20:241	uORF	0.0837073	0.110718	0.756042
ZNF770:NM_014106:chr15:-:322:348	Zfp770:NM_175466:chr2:-:120:146	overlap.uORF	0.109371	0	NA
ZNRF1:NM_032268:chr16:+:368:412	Znrf1:NM_001168621:chr8:+:71:244	uORF	0.156359	0.371308	0.421102
ZZZ3:NM_015534:chr1:-:150:188	Zzz3:NM_001080755:chr3:+:207:245	uORF	0.173518	0.489842	0.354232
ZZZ3:NM_015534:chr1:-:402:461	Zzz3:NM_001080755:chr3:+:393:452	overlap.uORF	0.0211079	0	NA

## Sheet: overlapping.uORF
Human ORF ID	Mouse ORF ID	Mouse ORF type	Ka	Ks	Ka/Ks
ABCE1:NM_001040876:chr4:+:355:480	Abce1:NM_015751:chr8:-:137:280	overlap.uORF	0.234648	0.338763	0.692661
ABCE1:NM_002940:chr4:+:355:483	Abce1:NM_015751:chr8:-:137:280	overlap.uORF	0.22711	0.33331	0.681377
ABI1:NM_001012750:chr10:-:207:248	Abi1:NM_001077190:chr2:-:144:200	overlap.uORF	0.0316285	0	NA
ACER2:NM_001010887:chr9:+:73:198	Acer2:NM_139306:chr4:+:59:352	overlap.uORF	0.0813051	0.1461	0.556503
ACTN1:NM_001102:chr14:-:129:323	Actn1:NM_134156:chr12:-:0:293	overlap.uORF	0.339873	0.356216	0.95412
ACTR3:NM_005721:chr2:+:262:432	Actr3:NM_001205385:chr1:-:128:319	overlap.uORF	0.175344	0.332293	0.527679
ADCY7:NM_001114:chr16:+:252:317	Adcy7:NM_001037723:chr8:+:381:620	overlap.uORF	0.169123	0.188894	0.895332
AGBL5:NM_001035507:chr2:+:198:260	Agbl5:NM_001048192:chr5:+:103:165	overlap.uORF	0	0	NA
AGL:NM_000028:chr1:+:408:491	Agl:NM_001081326:chr3:-:71:220	overlap.uORF	0.148891	0.302909	0.491537
AGL:NM_000643:chr1:+:128:211	Agl:NM_001081326:chr3:-:71:220	overlap.uORF	0.13054	0.295966	0.441064
AHDC1:NM_001029882:chr1:-:667:978	Ahdc1:NM_146155:chr4:+:348:659	overlap.uORF	0.066458	0.0707493	0.939345
AKAP13:NM_006738:chr15:+:112:204	Akap13:NM_029332:chr7:+:27:236	overlap.uORF	0.0915776	0.195054	0.469498
AKAP8L:NM_014371:chr19:-:47:130	Akap8l:NM_017476:chr17:-:14:136	overlap.uORF	0.497545	0.294896	1.68718
AKT1S1:NM_001098633:chr19:-:76:210	Akt1s1:NM_026270:chr7:+:46:225	overlap.uORF	0.556708	0.856857	0.64971
ALG12:NM_024105:chr22:-:197:334	Alg12:NM_001142357:chr15:-:46:147	overlap.uORF	0.333102	0.503758	0.661233
AMOTL1:NM_130847:chr11:+:159:215	Amotl1:NM_001081395:chr9:-:207:314	overlap.uORF	0.175374	0.134892	1.30011
ANG:NM_001145:chr14:+:520:606	Ang:NM_001161731:chr14:+:22:204	overlap.uORF	0.647138	0.726942	0.890219
ANKRD52:NM_173595:chr12:-:65:142	Ankrd52:NM_172790:chr10:+:74:151	overlap.uORF	0.0182695	0.0528538	0.345661
ANXA11:NM_145868:chr10:-:238:408	Anxa11:NM_013469:chr14:+:31:267	overlap.uORF	0.258878	0.164714	1.57168
AP1AR:NM_001128426:chr4:+:279:422	Ap1ar:NM_145964:chr3:-:262:384	overlap.uORF	0.156229	0.0842629	1.85407
AP1B1:NM_001127:chr22:-:164:190	Ap1b1:NM_001243043:chr11:+:230:454	overlap.uORF	0	0.387518	0
AP5S1:NM_001204446:chr20:+:91:393	Ap5s1:NM_027129:chr2:+:201:371	overlap.uORF	0.397353	0.594644	0.668219
AP5S1:NM_001204447:chr20:+:91:225	Ap5s1:NM_027129:chr2:+:230:307	overlap.uORF	0.43776	0.534792	0.818561
AP5S1:NM_018347:chr20:+:91:297	Ap5s1:NM_027129:chr2:+:201:371	overlap.uORF	0.506753	0.718635	0.705161
ARHGAP5:NM_001030055:chr14:+:262:318	Arhgap5:NM_009706:chr12:+:118:174	overlap.uORF	0.0950186	0.257382	0.369173
ARHGEF28:NM_001080479:chr5:+:138:185	Arhgef28:NM_012026:chr13:-:54:113	overlap.uORF	0.312366	0.389421	0.802128
ARL13B:NM_001174150:chr3:+:256:297	Arl13b:NM_026577:chr16:-:268:309	overlap.uORF	0.111169	0.107734	1.03189
ARL5A:NM_177985:chr2:-:92:175	Arl5a:NM_182994:chr2:-:216:353	overlap.uORF	0.28604	0.126398	2.26301
ARMC10:NM_001161009:chr7:+:295:543	Armc10:NM_026034:chr5:+:49:276	overlap.uORF	0.388295	0.399372	0.972263
ARMC10:NM_001161010:chr7:+:295:636	Armc10:NM_026034:chr5:+:49:276	overlap.uORF	0.43928	0.444263	0.988785
ARSA:NM_001085425:chr22:-:110:370	Arsa:NM_009713:chr15:-:870:965	uORF	0.2762	0.872318	0.316627
ARSA:NM_001085426:chr22:-:110:322	Arsa:NM_009713:chr15:-:870:965	uORF	0.2762	0.872318	0.316627
ATF4:NM_182810:chr22:+:183:362	Atf4:NM_001287180:chr15:+:214:393	overlap.uORF	0.0544223	0.241078	0.225746
ATF5:NM_001193646:chr19:+:253:432	Atf5:NM_030693:chr7:-:157:348	overlap.uORF	0.207382	0.192804	1.07561
ATG13:NM_001205119:chr11:+:575:709	Atg13:NM_145528:chr2:-:306:440	overlap.uORF	0.0946406	0.142725	0.663099
ATG13:NM_001205121:chr11:+:575:760	Atg13:NM_145528:chr2:-:306:440	overlap.uORF	0.0949826	0.180819	0.525292
ATG3:NM_022488:chr3:-:19:126	Atg3:NM_026402:chr16:+:48:356	overlap.uORF	0.637502	0.798216	0.798659
ATG5:NM_004849:chr6:-:328:363	Atg5:NM_053069:chr10:+:260:295	overlap.uORF	0.11165	0.296724	0.376274
ATP13A2:NM_001141973:chr1:-:171:482	Atp13a2:NM_001164366:chr4:+:175:486	overlap.uORF	0.0777549	0.219464	0.354294
ATP2C1:NM_001001485:chr3:+:496:534	Atp2c1:NM_001253834:chr9:-:296:334	overlap.uORF	0.11029	0	NA
ATXN1L:NM_001137675:chr16:+:106:309	Atxn1l:NM_001080930:chr8:-:296:364	overlap.uORF	0.119118	0.174431	0.682891
B3GNT2:NM_006577:chr2:+:167:241	B3gnt2:NM_016888:chr11:-:159:236	uORF	0.485937	0.774633	0.627312
B4GALT2:NM_001005417:chr1:+:86:259	B4galt2:NM_001253381:chr4:-:464:601	overlap.uORF	0.0661314	0.0514613	1.28507
B4GALT2:NM_003780:chr1:+:322:459	B4galt2:NM_001253381:chr4:-:464:601	overlap.uORF	0.0661314	0.0514613	1.28507
B4GALT2:NM_030587:chr1:+:29:166	B4galt2:NM_017377:chr4:-:410:472	overlap.uORF	0.128681	0.441417	0.291517
B4GALT2:NM_030587:chr1:+:72:260	B4galt2:NM_001253381:chr4:-:464:601	overlap.uORF	0.0661314	0.0514613	1.28507
BACH1:NM_001186:chr21:+:59:124	Bach1:NM_007520:chr16:+:107:172	overlap.uORF	0.26955	0.781531	0.3449
BAP1:NM_004656:chr3:-:86:118	Bap1:NM_027088:chr14:+:100:132	overlap.uORF	0.0489913	0.121512	0.40318
BBS12:NM_001178007:chr4:+:374:505	Bbs12:NM_001008502:chr3:+:29:178	overlap.uORF	0.189398	0.208819	0.906997
BBX:NM_001142568:chr3:+:296:340	Bbx:NM_027444:chr16:-:272:316	overlap.uORF	0.0295446	0.147203	0.200706
BCL2L11:NM_001204106:chr2:+:239:307	Bcl2l11:NM_009754:chr2:+:179:247	overlap.uORF	0.0198131	0.0705143	0.280979
BDH1:NM_004051:chr3:-:87:314	Bdh1:NM_175177:chr16:+:141:323	overlap.uORF	0.592601	0.709721	0.834978
BMP4:NM_001202:chr14:-:379:432	Bmp4:NM_007554:chr14:-:388:441	overlap.uORF	0	0	NA
BOK:NM_032515:chr2:+:110:529	Bok:NM_016778:chr1:+:113:292	overlap.uORF	0.245253	0.136959	1.7907
BRD4:NM_014299:chr19:-:208:255	Brd4:NM_001286630:chr17:-:271:342	overlap.uORF	0.0329933	0.0749543	0.440178
BTN2A2:NM_001197237:chr6:+:123:254	Btn2a2:NM_001289614:chr13:-:128:379	overlap.uORF	0.35192	0.317629	1.10796
BTN2A2:NM_001197240:chr6:+:5:232	Btn2a2:NM_001289614:chr13:-:128:379	overlap.uORF	0.556536	0.723365	0.769371
BUB1B:NM_001211:chr15:+:205:249	Bub1b:NM_009773:chr2:+:230:253	overlap.uORF	0	0.766679	0
C11orf30:NM_020193:chr11:+:81:356	2210018M11Rik:NM_172280:chr7:-:73:348	overlap.uORF	0.0425857	0.0368593	1.15536
C11orf58:NM_014267:chr11:+:39:251	1110004F10Rik:NM_019772:chr7:+:40:156	overlap.uORF	0.278505	0.209557	1.32902
C12orf49:NM_024738:chr12:-:71:271	2410131K14Rik:NM_001081236:chr5:+:72:311	overlap.uORF	0.304355	0.221766	1.37241
C14orf79:NM_174891:chr14:+:8:193	BC022687:NM_145450:chr12:+:287:454	overlap.uORF	0.76635	0.892334	0.858815
C17orf58:NM_181655:chr17:-:176:394	1810010H24Rik:NM_001163473:chr11:+:17:217	overlap.uORF	0.200526	0.110082	1.82161
C1orf159:NM_017891:chr1:-:380:670	9430015G10Rik:NM_145557:chr4:+:145:246	overlap.uORF	0.401929	0.646782	0.62143
C1orf21:NM_030806:chr1:+:469:612	1700025G04Rik:NM_197990:chr1:-:510:653	overlap.uORF	0.0756001	0	NA
C20orf24:NM_001199534:chr20:+:114:221	1110008F13Rik:NM_026124:chr2:+:6:185	overlap.uORF	0.269695	0.1957	1.3781
C22orf25:NM_152906:chr22:+:129:197	Tango2:NM_138583:chr16:-:51:95	overlap.uORF	0.240568	0.289269	0.831639
C2CD3:NM_015531:chr11:-:159:230	C2cd3:NM_001017985:chr7:+:141:212	overlap.uORF	0.256084	0.656043	0.390346
C4orf33:NM_173487:chr4:+:245:406	D3Ertd751e:NM_001099785:chr3:+:1:114	overlap.uORF	0.504456	0.797948	0.632192
C7orf25:NM_001099858:chr7:-:186:236	AW209491:NM_001104646:chr13:+:293:355	overlap.uORF	0.350126	0.184035	1.9025
CAND1:NM_018448:chr12:+:321:482	Cand1:NM_027994:chr10:-:195:392	overlap.uORF	0.180237	0.123477	1.45969
CAPN10:NM_023083:chr2:+:174:371	Capn10:NM_011796:chr1:+:444:641	overlap.uORF	0.130916	0.186093	0.703496
CASD1:NM_022900:chr7:+:213:284	Casd1:NM_145398:chr6:+:89:160	overlap.uORF	0	0	NA
CC2D1B:NM_032449:chr1:-:47:154	Cc2d1b:NM_177045:chr4:+:25:450	overlap.uORF	0.417589	0.382612	1.09142
CCDC120:NM_033626:chrX:+:158:238	Ccdc120:NM_207202:chrX:-:196:330	overlap.uORF	0.225371	0.289027	0.779758
CCDC85B:NM_006848:chr11:+:357:413	Ccdc85b:NM_001243307:chr19:-:143:199	overlap.uORF	0.0866171	0.403576	0.214624
CCNC:NM_005190:chr6:-:226:339	Ccnc:NM_001122982:chr4:+:117:233	overlap.uORF	0.0577411	0.167187	0.345368
CCNI:NM_006835:chr4:-:429:608	Ccni:NM_017367:chr5:-:504:629	overlap.uORF	0.0565193	0.129861	0.435231
CDC42:NM_001791:chr1:+:29:226	Cdc42:NM_001243769:chr4:-:18:125	uORF	0.108307	0.0792609	1.36646
CEBPG:NM_001252296:chr19:+:130:189	Cebpg:NM_009884:chr7:-:261:290	overlap.uORF	0.158482	0	NA
CENPJ:NM_018451:chr13:-:70:204	Cenpj:NM_001014996:chr14:-:56:163	uORF	0.539275	0.59041	0.913391
CENPO:NM_001199803:chr2:+:104:247	Cenpo:NM_134046:chr12:-:605:721	overlap.uORF	0.850819	1.62619	0.523199
CEP128:NM_152446:chr14:-:76:222	Cep128:NM_181815:chr12:-:273:365	uORF	0.745048	1.55484	0.479179
CEP350:NM_014810:chr1:+:331:516	Cep350:NM_001039184:chr1:-:368:550	overlap.uORF	0.076412	0.103158	0.740731
CGREF1:NM_001166240:chr2:-:60:305	Cgref1:NM_026770:chr5:-:0:155	overlap.uORF	0.528462	0.504101	1.04833
CHKA:NM_001277:chr11:-:123:284	Chka:NM_001271496:chr19:+:20:577	overlap.uORF	0.29645	0.110316	2.68729
CHORDC1:NM_001144073:chr11:-:385:459	Chordc1:NM_025844:chr9:+:102:233	overlap.uORF	0.559817	0.221568	2.52662
CIZ1:NM_001257976:chr9:-:163:369	Ciz1:NM_001252536:chr2:+:10:510	overlap.uORF	0.832245	0.922841	0.901829
CLCN3:NM_001243372:chr4:+:480:569	Clcn3:NM_173873:chr8:-:473:562	overlap.uORF	0.247874	0.050002	4.95729
CLOCK:NM_001267843:chr4:-:894:941	Clock:NM_001289826:chr5:-:22:360	overlap.uORF	0.124141	0.106884	1.16146
CMAS:NM_018686:chr12:+:93:272	Cmas:NM_009908:chr6:+:52:198	overlap.uORF	0.252867	0.256098	0.987384
CNOT1:NM_001265612:chr16:-:284:343	Cnot1:NM_001205226:chr8:-:254:313	overlap.uORF	0	0	NA
CNOT6:NM_015455:chr5:+:263:457	Cnot6:NM_212484:chr11:-:273:467	overlap.uORF	0.0496528	0.0677619	0.732754
CNPY2:NM_001190991:chr12:-:377:658	Cnpy2:NM_019953:chr10:+:158:451	overlap.uORF	0.269402	0.229559	1.17356
COMMD5:NM_001081003:chr8:-:205:279	Commd5:NM_025536:chr15:+:32:151	overlap.uORF	0.57335	0.0697032	8.22559
COX14:NM_032901:chr12:+:297:350	Cox14:NM_183256:chr15:+:204:260	overlap.uORF	0.219216	0.388455	0.564328
CREB1:NM_004379:chr2:+:219:254	Creb1:NM_009952:chr1:+:136:228	overlap.uORF	0	0	NA
CRYZ:NM_001130042:chr1:-:365:526	Cryz:NM_009968:chr3:+:552:608	overlap.uORF	0.218291	0.533879	0.408877
CRYZ:NM_001130043:chr1:-:374:487	Cryz:NM_009968:chr3:+:552:608	overlap.uORF	0.218291	0.533879	0.408877
CSDE1:NM_001007553:chr1:-:442:516	Csde1:NM_001161854:chr3:+:516:551	overlap.uORF	0.0415331	0	NA
CSGALNACT2:NM_018590:chr10:+:286:342	Csgalnact2:NM_030165:chr6:-:333:389	overlap.uORF	0.27339	0.543055	0.50343
CTNNBL1:NM_030877:chr20:+:17:112	Ctnnbl1:NM_025680:chr2:+:115:150	overlap.uORF	0.0835156	0.550266	0.151773
CUX1:NM_001202543:chr7:+:117:173	Cux1:NM_009986:chr5:-:181:237	overlap.uORF	0	0	NA
CYHR1:NM_001129888:chr8:-:241:354	Cyhr1:NM_001276322:chr15:-:377:463	overlap.uORF	0.300767	0.240733	1.24938
CYP39A1:NM_016593:chr6:-:25:213	Cyp39a1:NM_001285947:chr17:+:59:187	uORF	0.672117	1.69058	0.397565
DCAF12:NM_015397:chr9:-:269:361	Dcaf12:NM_026893:chr4:-:263:355	overlap.uORF	0.131251	0.249482	0.526095
DCBLD2:NM_080927:chr3:-:337:384	Dcbld2:NM_028523:chr16:+:195:242	overlap.uORF	0.0815168	0.34576	0.235761
DCP2:NM_001242377:chr5:+:195:410	Dcp2:NM_027490:chr18:+:105:320	overlap.uORF	0.0759071	0.0907921	0.836054
DHFRL1:NM_001195643:chr3:-:332:541	Dhfr:NM_010049:chr13:+:448:615	overlap.uORF	0.328147	0.06871	4.77583
DHFRL1:NM_176815:chr3:-:234:428	Dhfr:NM_010049:chr13:+:448:615	overlap.uORF	0.344511	0.106884	3.22323
DLK2:NM_023932:chr6:-:154:291	Dlk2:NM_001286013:chr17:+:13:288	overlap.uORF	0.152367	0.134095	1.13626
DLK2:NM_206539:chr6:-:53:199	Dlk2:NM_001286013:chr17:+:13:288	overlap.uORF	0.201342	0.129418	1.55575
DNAJB6:NM_005494:chr7:+:88:171	Dnajb6:NM_001037940:chr5:+:85:261	overlap.uORF	0.412069	0.620079	0.664543
DOCK8:NM_203447:chr9:+:18:281	Dock8:NM_028785:chr19:+:16:291	overlap.uORF	0.32574	0.198627	1.63995
DSE:NM_001080976:chr6:+:153:197	Dse:NM_172508:chr10:-:484:528	overlap.uORF	0.137874	0	NA
DTX4:NM_015177:chr11:+:84:296	Dtx4:NM_172442:chr19:-:519:818	overlap.uORF	0.150802	0.206142	0.731542
EDEM1:NM_014674:chr3:+:109:270	Edem1:NM_138677:chr6:+:76:237	overlap.uORF	0.139552	0.0765908	1.82205
EGLN2:NM_053046:chr19:+:394:474	Egln2:NM_053208:chr7:-:299:379	overlap.uORF	0.0363831	0	NA
EHBP1L1:NM_001099409:chr11:+:5:268	Ehbp1l1:NM_001114595:chr19:-:25:66	uORF	0.225168	0.411337	0.547405
EIF2S1:NM_004094:chr14:+:89:160	Eif2s1:NM_026114:chr12:+:31:129	overlap.uORF	0.38355	0.411129	0.932917
EIF2S2:NM_003908:chr20:-:53:187	Eif2s2:NM_026030:chr2:-:122:220	overlap.uORF	0.200576	0.642108	0.312372
EIF4G1:NM_001194946:chr3:+:188:274	Eif4g1:NM_001005331:chr16:+:4:165	overlap.uORF	0.324652	0.768929	0.422213
EIF4G1:NM_001194947:chr3:+:197:217	Eif4g1:NM_001005331:chr16:+:145:165	overlap.uORF	0	0	NA
EIF4G3:NM_001198801:chr1:-:530:625	Eif4g3:NM_001256195:chr4:+:514:609	overlap.uORF	0.0436275	0.148879	0.293039
EIF5:NM_001969:chr14:+:446:739	Eif5:NM_173363:chr12:+:311:604	overlap.uORF	0.00873379	0.0166669	0.524022
EIF5:NM_183004:chr14:+:411:596	Eif5:NM_173363:chr12:+:311:604	overlap.uORF	0.01421	0.0248474	0.571889
EMC4:NM_016454:chr15:+:34:99	Emc4:NM_026519:chr2:-:11:181	overlap.uORF	0.58482	0.504153	1.16
EPS15:NM_001981:chr1:-:78:119	Eps15:NM_007943:chr4:+:123:164	overlap.uORF	0.0707241	0	NA
ERCC6L2:NM_001010895:chr9:+:299:538	Ercc6l2:NM_001013608:chr13:+:75:269	overlap.uORF	0.423796	0.56808	0.746016
ERCC8:NM_000082:chr5:-:30:170	Ercc8:NM_028042:chr13:+:16:114	overlap.uORF	0.279987	0.11777	2.3774
ETV5:NM_004454:chr3:-:203:328	Etv5:NM_023794:chr16:-:88:213	overlap.uORF	0.12646	0.297844	0.424587
EXT1:NM_000127:chr8:-:604:858	Ext1:NM_010162:chr15:-:651:905	overlap.uORF	0.0104919	0	NA
FAM118B:NM_024556:chr11:+:17:211	Fam118b:NM_175411:chr9:-:26:118	overlap.uORF	0.0324285	0.0380075	0.853214
FAM126A:NM_032581:chr7:-:245:304	Fam126a:NM_053090:chr5:-:223:282	overlap.uORF	0.198973	0	NA
FAM160A2:NM_001098794:chr11:-:265:453	Fam160a2:NM_001242363:chr7:-:362:550	overlap.uORF	0.14174	0.115714	1.22492
FAM178A:NM_001136123:chr10:+:415:567	Fam178a:NM_001081225:chr19:+:8:217	overlap.uORF	0.0356893	0.0289328	1.23352
FAM179B:NM_015091:chr14:+:172:312	Fam179b:NM_177805:chr12:+:198:335	overlap.uORF	0.298746	0.413432	0.7226
FAM188A:NM_024948:chr10:-:168:233	Fam188a:NM_024185:chr2:-:152:220	overlap.uORF	0.300037	0.603486	0.497174
FAM189B:NM_001267608:chr1:-:329:622	Fam189b:NM_001014995:chr3:+:228:518	overlap.uORF	0.211561	0.219664	0.96311
FAM198B:NM_001031700:chr4:-:339:410	Fam198b:NM_133187:chr3:+:229:300	overlap.uORF	0.0773183	0.598384	0.129212
FAM222B:NM_001077498:chr17:-:169:210	Fam222b:NM_145430:chr11:+:146:187	overlap.uORF	0.150978	0.11029	1.36892
FAM3A:NM_001171132:chrX:-:305:376	Fam3a:NM_025473:chrX:-:243:455	overlap.uORF	0.374449	0.437123	0.856623
FAM3A:NM_001171134:chrX:-:429:473	Fam3a:NM_025473:chrX:-:243:455	overlap.uORF	0.176702	0.10463	1.68883
FAM54B:NM_001099625:chr1:+:134:337	Mtfr1l:NM_001256112:chr4:-:222:287	uORF	0.356794	0.278125	1.28285
FAM65A:NM_001193522:chr16:+:96:176	Fam65a:NM_001081241:chr8:+:120:200	overlap.uORF	0.0737143	0.0491349	1.50024
FAM65A:NM_001193523:chr16:+:119:301	Fam65a:NM_001081241:chr8:+:120:200	overlap.uORF	0.0939287	0.0483293	1.94351
FAM83G:NM_001039999:chr17:-:46:237	Fam83g:NM_178618:chr11:+:27:359	overlap.uORF	0.568415	0.375156	1.51514
FAM96A:NM_001014812:chr15:-:224:307	Fam96a:NM_026635:chr9:+:220:303	overlap.uORF	0.14571	0.224837	0.648066
FANCI:NM_001113378:chr15:+:80:172	Fanci:NM_145946:chr7:+:63:107	overlap.uORF	0.124541	0.350578	0.355246
FARP2:NM_014808:chr2:+:154:243	Farp2:NM_145519:chr1:+:102:284	overlap.uORF	0.22229	0.209341	1.06186
FBXL4:NM_012160:chr6:-:183:464	Fbxl4:NM_172988:chr4:+:174:425	overlap.uORF	0.303016	0.410985	0.737292
FBXO16:NM_001258211:chr8:-:76:243	Fbxo16:NM_015795:chr14:+:83:214	overlap.uORF	0.280663	0.45242	0.620359
FBXO30:NM_032145:chr6:-:87:245	Fbxo30:NM_001168297:chr10:+:104:202	overlap.uORF	0.242917	0.496246	0.489509
FBXW5:NM_018998:chr9:-:176:241	Fbxw5:NM_013908:chr2:+:1:189	overlap.uORF	0.0923142	0.061453	1.50219
FEM1B:NM_015322:chr15:+:509:700	Fem1b:NM_010193:chr9:-:237:419	overlap.uORF	0.0716326	0.111489	0.642508
FGF5:NM_004464:chr4:+:124:240	Fgf5:NM_001277268:chr5:+:115:231	overlap.uORF	0.127579	0.0729753	1.74824
FKBP11:NM_001143782:chr12:-:58:195	Fkbp11:NM_024169:chr15:-:28:189	overlap.uORF	0.51694	0.361438	1.43023
FLI1:NM_001271010:chr11:+:302:379	Fli1:NM_008026:chr9:-:119:196	overlap.uORF	0.0179364	0	NA
FUT10:NM_032664:chr8:-:166:447	Fut10:NM_001286422:chr8:+:221:583	overlap.uORF	0.348141	0.397408	0.876027
FZD1:NM_003505:chr7:+:223:420	Fzd1:NM_021457:chr5:-:443:643	overlap.uORF	0.248778	0.321044	0.774904
GAL3ST4:NM_024637:chr7:-:275:619	Gal3st4:NM_001033416:chr5:-:1305:1532	overlap.uORF	0.236041	0.187153	1.26122
GALNT3:NM_004482:chr2:-:316:399	Galnt3:NM_015736:chr2:-:349:399	overlap.uORF	0.178519	0.146242	1.22071
GATA2:NM_001145661:chr3:-:382:486	Gata2:NM_008090:chr6:+:2:313	overlap.uORF	0.332609	0.569937	0.583589
GBP3:NM_018284:chr1:-:194:226	Gbp2:NM_010260:chr3:+:102:233	overlap.uORF	0.239834	0.445177	0.538738
GDF5:NM_000557:chr20:-:125:322	Gdf5:NM_008109:chr2:-:118:312	overlap.uORF	0.0959411	0.203947	0.470421
GEN1:NM_001130009:chr2:+:153:227	Gen1:NM_177331:chr12:-:156:236	overlap.uORF	0.403745	0	NA
GJC1:NM_001080383:chr17:-:239:409	Gjc1:NM_001159382:chr11:-:120:422	overlap.uORF	0.122621	0.0418874	2.9274
GJC1:NM_005497:chr17:-:108:413	Gjc1:NM_001159382:chr11:-:120:422	overlap.uORF	0.155612	0.170071	0.91498
GNAI2:NM_002070:chr3:+:47:136	Gnai2:NM_008138:chr9:-:57:140	overlap.uORF	0	0.0783348	0
GNB2:NM_005273:chr7:+:38:280	Gnb2:NM_010312:chr5:-:68:187	overlap.uORF	0.0544966	0.0498448	1.09333
GPC6:NM_005708:chr13:+:501:656	Gpc6:NM_001079844:chr14:+:604:663	overlap.uORF	0.166076	0.130271	1.27486
GRK4:NM_001004056:chr4:+:367:519	Grk4:NM_001080743:chr5:+:450:632	overlap.uORF	0.531674	0.489383	1.08642
GRK4:NM_001004057:chr4:+:367:534	Grk4:NM_001080743:chr5:+:450:632	overlap.uORF	0.593412	0.440292	1.34777
GSTCD:NM_024751:chr4:+:34:378	Gstcd:NM_026231:chr3:-:118:195	overlap.uORF	0.196087	0.0792578	2.47404
GUCD1:NM_031444:chr22:-:291:470	Gucd1:NM_175133:chr10:-:101:286	overlap.uORF	0.108754	0.0482225	2.25526
H2AFY2:NM_018649:chr10:+:338:511	H2afy2:NM_207000:chr10:-:92:301	overlap.uORF	0.153312	0.167838	0.913447
HACL1:NM_012260:chr3:-:107:232	Hacl1:NM_019975:chr14:-:52:168	overlap.uORF	0.147872	0.161775	0.914056
HDHD2:NM_032124:chr18:-:126:194	Hdhd2:NM_001039201:chr18:+:113:181	overlap.uORF	0.0784008	0.0862994	0.908475
HIATL1:NM_032558:chr9:+:153:272	Hiatl1:NM_133680:chr13:-:282:368	overlap.uORF	0.261487	0.414661	0.630605
HIPK2:NM_001113239:chr7:-:246:350	Hipk2:NM_010433:chr6:-:348:452	overlap.uORF	0	0	NA
HMGXB3:NM_014983:chr5:+:409:606	Hmgxb3:NM_134134:chr18:-:305:505	overlap.uORF	0.181223	0.346628	0.522819
HNRNPA2B1:NM_031243:chr7:-:181:231	Hnrnpa2b1:NM_016806:chr6:-:72:266	overlap.uORF	0.0949582	0.0730595	1.29974
HOXA3:NM_030661:chr7:-:136:279	Hoxa3:NM_010452:chr6:-:110:466	overlap.uORF	0.0808473	0.0867544	0.931911
HS6ST1:NM_004807:chr2:-:24:71	Hs6st1:NM_015818:chr1:+:248:295	overlap.uORF	0	0	NA
HSP90B1:NM_003299:chr12:+:102:185	Hsp90b1:NM_011631:chr10:-:36:92	overlap.uORF	0.204352	0.14826	1.37834
HYAL3:NM_001200030:chr3:-:254:355	Hyal3:NM_178020:chr9:+:51:140	overlap.uORF	0.445213	0.42878	1.03832
ID1:NM_002165:chr20:+:71:214	Id1:NM_010495:chr2:+:5:133	overlap.uORF	0.523128	0.617625	0.846999
IFT20:NM_001267775:chr17:-:60:236	Ift20:NM_018854:chr11:+:355:420	overlap.uORF	0.132828	0.07673	1.73111
IFT20:NM_001267776:chr17:-:60:200	Ift20:NM_018854:chr11:+:355:420	overlap.uORF	0.200616	0.392988	0.51049
IKBKAP:NM_003640:chr9:-:471:605	Ikbkap:NM_026079:chr4:-:176:271	overlap.uORF	0.248484	0.158867	1.5641
ILF3:NM_001137673:chr19:+:286:345	Ilf3:NM_001042708:chr9:+:287:391	overlap.uORF	0.169836	0.341297	0.497621
IMPA2:NM_014214:chr18:+:153:245	Impa2:NM_053261:chr18:+:6:185	overlap.uORF	0.496165	1.07188	0.462891
IMPA2:NM_014214:chr18:+:34:360	Impa2:NM_053261:chr18:+:1:390	overlap.uORF	0.431726	0.613105	0.704163
IMPDH1:NM_001142573:chr7:-:78:245	Impdh1:NM_011829:chr6:-:77:244	overlap.uORF	0.0524266	0.0674494	0.777274
IMPDH1:NM_183243:chr7:-:68:367	Impdh1:NM_011829:chr6:-:77:244	overlap.uORF	0.143544	0.181178	0.792284
IP6K2:NM_001005909:chr3:-:110:358	Ip6k2:NM_029634:chr9:+:4:204	overlap.uORF	0.614808	1.27554	0.481998
IP6K2:NM_001005910:chr3:-:110:361	Ip6k2:NM_029634:chr9:+:4:204	overlap.uORF	0.677424	1.26763	0.534403
IP6K2:NM_001190317:chr3:-:150:497	Ip6k2:NM_029634:chr9:+:131:310	overlap.uORF	0.225904	0.211264	1.06929
IRF6:NM_006147:chr1:-:54:362	Irf6:NM_016851:chr1:+:130:363	overlap.uORF	0.428624	0.531128	0.807007
IST1:NM_001270975:chr16:+:45:131	Ist1:NM_028018:chr8:-:53:151	overlap.uORF	0.300424	0.472797	0.635419
ITGA4:NM_000885:chr2:+:743:823	Itga4:NM_010576:chr2:+:214:294	overlap.uORF	0.156318	0.621339	0.251583
ITPRIPL2:NM_001034841:chr16:+:459:578	Itpripl2:NM_001033380:chr7:-:585:689	overlap.uORF	0.262764	0.147785	1.77802
JAG1:NM_000214:chr20:-:382:558	Jag1:NM_013822:chr2:-:129:218	uORF	0.0673271	0.131443	0.512216
JOSD2:NM_001270639:chr19:-:197:424	Josd2:NM_001205071:chr7:+:169:291	overlap.uORF	0.258341	0.248074	1.04139
JOSD2:NM_001270640:chr19:-:197:421	Josd2:NM_001205071:chr7:+:169:291	overlap.uORF	0.267624	0.25204	1.06183
JOSD2:NM_001270641:chr19:-:197:442	Josd2:NM_001205071:chr7:+:169:291	overlap.uORF	0.258341	0.248074	1.04139
JOSD2:NM_001270686:chr19:-:1:267	Josd2:NM_001205071:chr7:+:169:291	overlap.uORF	0.291856	0.245247	1.19005
JOSD2:NM_138334:chr19:-:1:270	Josd2:NM_001205071:chr7:+:169:291	overlap.uORF	0.258341	0.248074	1.04139
JRKL:NM_001261833:chr11:+:206:277	Jrkl:NM_001033181:chr9:-:67:117	overlap.uORF	0.183148	0.0961908	1.90401
KANK1:NM_001256876:chr9:+:588:671	Kank1:NM_181404:chr19:+:311:436	overlap.uORF	0.313937	0.334467	0.938617
KAT6A:NM_001099412:chr8:-:521:550	Kat6a:NM_001081149:chr8:+:471:500	overlap.uORF	0	0	NA
KATNBL1:NM_024713:chr15:-:135:185	Katnbl1:NM_024254:chr2:+:136:171	overlap.uORF	0.0399478	0.151385	0.263881
KDM2A:NM_012308:chr11:+:821:931	Kdm2a:NM_001001984:chr19:-:654:836	overlap.uORF	0.108701	0	NA
KEAP1:NM_012289:chr19:-:11:178	Keap1:NM_001110305:chr9:-:532:609	overlap.uORF	0.262191	0.540613	0.484987
KEAP1:NM_203500:chr19:-:142:207	Keap1:NM_001110305:chr9:-:532:609	overlap.uORF	0.294034	0.687199	0.427873
KIAA0195:NM_014738:chr17:+:205:453	2310067B10Rik:NM_028014:chr11:+:157:405	overlap.uORF	0.165088	0.137234	1.20297
KIAA0247:NM_014734:chr14:+:164:334	4933426M11Rik:NM_001242419:chr12:+:284:352	uORF	0.202789	0.226443	0.89554
KIAA0430:NM_001184998:chr16:-:158:229	Marf1:NM_001081154:chr16:-:162:209	overlap.uORF	0.118291	1.16733	0.101334
KIAA0494:NM_014774:chr1:-:933:980	Efcab14:NM_172698:chr4:+:449:589	overlap.uORF	0.131758	0.0891529	1.47788
KIAA0528:NM_014802:chr12:-:152:292	C2cd5:NM_001109688:chr6:-:173:316	overlap.uORF	0.199047	0.39739	0.500886
KIAA0930:NM_001009880:chr22:-:25:81	5031439G07Rik:NM_001033273:chr15:-:153:314	overlap.uORF	0.13791	0.245901	0.560838
KIAA1468:NM_020854:chr18:+:27:260	2310035C23Rik:NM_029349:chr1:+:194:292	overlap.uORF	0.196929	0.26693	0.737753
KIF16B:NM_001199865:chr20:-:152:334	Kif16b:NM_001081133:chr2:-:86:268	overlap.uORF	0.0588448	0	NA
KITLG:NM_000899:chr12:-:85:198	Kitl:NM_013598:chr10:+:87:200	overlap.uORF	0.0781429	0.106759	0.731957
KLF7:NM_001270942:chr2:-:135:254	Klf7:NM_033563:chr1:-:285:404	overlap.uORF	0.0470044	0.071807	0.654594
KRCC1:NM_016618:chr2:-:333:419	Krcc1:NM_145568:chr6:+:169:219	uORF	0.260115	0.331585	0.78446
KRT222:NM_152349:chr17:-:54:134	Krt222:NM_172946:chr11:-:18:98	overlap.uORF	0.0669696	0	NA
KXD1:NM_024069:chr19:+:145:222	Kxd1:NM_029366:chr8:-:110:199	overlap.uORF	0.148573	0.278298	0.533864
LAYN:NM_001258390:chr11:+:236:487	Layn:NM_001033534:chr9:-:27:275	overlap.uORF	0.293398	0.426558	0.687827
LDB2:NM_001130834:chr4:-:266:421	Ldb2:NM_001077398:chr5:-:203:358	overlap.uORF	0.0338972	0.0316074	1.07245
LGMN:NM_005606:chr14:-:218:307	Lgmn:NM_011175:chr12:-:3:224	overlap.uORF	0.453649	0.400506	1.13269
LIMK2:NM_001031801:chr22:+:276:449	Limk2:NM_173053:chr11:-:292:423	overlap.uORF	0.0759408	0.174734	0.434608
LIMS1:NM_001193484:chr2:+:45:128	Lims1:NM_201242:chr10:+:120:158	overlap.uORF	0.246207	0.334467	0.736115
LIX1L:NM_153713:chr1:+:36:158	Lix1l:NM_001163170:chr3:+:11:88	overlap.uORF	0.140574	0.227396	0.61819
LMBR1L:NM_018113:chr12:-:328:465	Lmbr1l:NM_029098:chr15:-:163:300	overlap.uORF	0.092122	0.0327771	2.81056
LOC100127983:NM_001190972:chr8:-:145:195	Gm11837:NM_001243100:chr4:+:131:259	overlap.uORF	0.10657	0	NA
LOC100289561:NM_001242713:chr7:+:533:721	Rbak:NM_021326:chr5:-:272:451	overlap.uORF	0.661999	0.723719	0.914718
LOXL1:NM_005576:chr15:+:209:550	Loxl1:NM_010729:chr9:-:210:356	overlap.uORF	0.341013	0.656852	0.519162
LRRC14:NM_014665:chr8:+:68:415	Lrrc14:NM_145471:chr15:+:251:496	overlap.uORF	0.390567	0.363353	1.0749
LRRC20:NM_018205:chr10:-:70:147	Lrrc20:NM_153542:chr10:+:18:128	overlap.uORF	0.388168	0.410848	0.944797
LRRC27:NM_001143757:chr10:+:320:394	Lrrc27:NM_001143755:chr7:+:255:326	overlap.uORF	0.498362	0.62178	0.801508
LRRC45:NM_144999:chr17:+:208:366	Lrrc45:NM_153545:chr11:+:105:248	overlap.uORF	0.209401	0.182	1.15056
LSM10:NM_032881:chr1:-:116:190	Lsm10:NM_001163266:chr4:+:69:119	overlap.uORF	0.283504	0	NA
LSM1:NM_014462:chr8:-:357:413	Lsm1:NM_026032:chr8:+:34:84	overlap.uORF	0.691122	1.38264	0.499858
LYN:NM_001111097:chr8:+:239:322	Lyn:NM_001111096:chr4:+:50:262	overlap.uORF	0.103387	0	NA
LYPD1:NM_144586:chr2:-:923:988	Lypd1:NM_145100:chr1:-:286:423	overlap.uORF	0.275249	0.168159	1.63683
LYPD6:NM_001195685:chr2:+:267:431	Lypd6:NM_177139:chr2:+:205:237	overlap.uORF	0.0437645	0.17286	0.253178
LYRM5:NM_001001660:chr12:+:124:162	Lyrm5:NM_001163628:chr6:+:291:383	uORF	0.234458	0.421643	0.556057
MAGI3:NM_001142782:chr1:+:161:196	Magi3:NM_001159354:chr3:-:420:455	overlap.uORF	0.0661314	0.181535	0.364291
MANEA:NM_024641:chr6:+:172:246	Manea:NM_172865:chr4:-:86:160	overlap.uORF	0.0910313	0.0769526	1.18295
MAPKAPK3:NM_001243926:chr3:+:559:759	Mapkapk3:NM_178907:chr9:-:67:528	overlap.uORF	0.316886	0.25738	1.2312
MARCH8:NM_001002265:chr10:-:797:901	March8:NM_027920:chr6:+:388:504	overlap.uORF	0.180218	0.221557	0.813416
MAVS:NM_001206491:chr20:+:135:185	Mavs:NM_001206382:chr2:+:62:136	uORF	0.530802	0.483184	1.09855
MAX:NM_001271068:chr14:-:96:215	Max:NM_001146176:chr12:-:111:233	overlap.uORF	0.104584	0.0593502	1.76215
MBD6:NM_052897:chr12:+:180:227	Mbd6:NM_033072:chr10:-:107:154	overlap.uORF	0.116988	0	NA
MBOAT1:NM_001080480:chr6:-:198:389	Mboat1:NM_153546:chr13:+:170:277	overlap.uORF	0.144079	0.154109	0.934916
MCRS1:NM_006337:chr12:-:78:218	Mcrs1:NM_016766:chr15:-:97:237	overlap.uORF	0.0874804	0.176008	0.497025
MCTS1:NM_014060:chrX:+:284:364	Mcts1:NM_026902:chrX:+:103:126	overlap.uORF	0	0	NA
MESDC1:NM_022566:chr15:+:1035:1325	Mesdc1:NM_030705:chr7:-:1098:1127	overlap.uORF	0	0.150503	0
MFHAS1:NM_004225:chr8:-:421:759	Mfhas1:NM_001081279:chr8:+:327:602	overlap.uORF	0.427534	0.436202	0.980129
MFSD5:NM_032889:chr12:+:19:204	Mfsd5:NM_134100:chr15:+:17:385	overlap.uORF	0.469599	0.865759	0.542413
MGAT4B:NM_014275:chr5:-:326:529	Mgat4b:NM_145926:chr11:+:265:408	overlap.uORF	0.085219	0.0243786	3.49565
MLLT10:NM_001195628:chr10:+:298:333	Mllt10:NM_001252560:chr2:+:229:261	uORF	0.166142	0.0809722	2.05184
MON1B:NM_014940:chr16:+:283:675	Mon1b:NM_173015:chr8:+:186:686	overlap.uORF	0.288539	0.2595	1.1119
MOSPD2:NM_152581:chrX:+:54:149	Mospd2:NM_029730:chrX:-:42:125	overlap.uORF	0.255412	0.765441	0.33368
MOSPD3:NM_001040097:chr7:+:198:377	Mospd3:NM_001254762:chr5:-:193:510	overlap.uORF	0.076446	0.0190482	4.0133
MRM1:NM_024864:chr17:+:67:339	Mrm1:NM_145433:chr11:-:79:261	overlap.uORF	0.6617	0.607714	1.08883
MSL2:NM_018133:chr3:-:552:821	Msl2:NM_001100451:chr9:+:336:611	overlap.uORF	0.0663605	0.0328069	2.02276
MTERF:NM_006980:chr7:-:30:170	Mterf1b:NM_001042670:chr5:+:49:129	overlap.uORF	0.380928	0.301298	1.26429
MTFR1:NM_001145838:chr8:+:15:104	Mtfr1:NM_001253390:chr3:+:66:158	overlap.uORF	0.610178	0.69501	0.877941
MTMR11:NM_001145862:chr1:-:237:407	Mtmr11:NM_181409:chr3:+:209:394	overlap.uORF	0.11796	0.135662	0.869516
MYBL1:NM_001080416:chr8:-:391:429	Mybl1:NM_008651:chr1:-:239:277	overlap.uORF	0	0	NA
MYL6B:NM_001199629:chr12:+:278:349	Myl6b:NM_172259:chr10:-:60:131	overlap.uORF	0.0819969	0.0594284	1.37976
MYO1B:NM_001161819:chr2:+:16:111	Myo1b:NM_001161817:chr1:-:62:241	overlap.uORF	0.304001	0.436748	0.696056
MYO9A:NM_006901:chr15:-:396:494	Myo9a:NM_173018:chr9:+:22:246	overlap.uORF	0.16383	0.282243	0.580457
NAA50:NM_025146:chr3:-:284:334	Naa50:NM_028108:chr16:+:255:341	overlap.uORF	0.285816	0.141361	2.02189
NAP1L1:NM_004537:chr12:-:339:425	Nap1l1:NM_015781:chr10:+:50:193	overlap.uORF	0.148853	0.251745	0.591286
NCOA5:NM_020967:chr20:-:83:157	Ncoa5:NM_144892:chr2:-:55:129	overlap.uORF	0.0803386	0.110312	0.728286
NEDD8-MDP1:NM_001199823:chr14:-:14:109	Nedd8:NM_008683:chr14:-:11:100	overlap.uORF	0.26729	0.298785	0.894592
NEIL2:NM_001135748:chr8:+:190:381	Neil2:NM_201610:chr14:-:33:206	overlap.uORF	0.542811	0.689417	0.787348
NEK4:NM_001193533:chr3:-:123:263	Nek4:NM_011849:chr14:+:100:198	overlap.uORF	0.225188	0.191712	1.17461
NEK6:NM_001145001:chr9:+:356:445	Nek6:NM_001159631:chr2:+:126:275	overlap.uORF	0.229984	0.15547	1.47929
NEK9:NM_033116:chr14:-:126:251	Nek9:NM_145138:chr12:-:50:391	overlap.uORF	0.129915	0.139936	0.92839
NELF:NM_001130969:chr9:-:213:347	Nsmf:NM_001039386:chr2:+:203:337	overlap.uORF	0.0629111	0.0640633	0.982015
NFYA:NM_002505:chr6:+:39:206	Nfya:NM_001110832:chr17:-:27:233	uORF	0.271581	0.320126	0.848358
NFYB:NM_006166:chr12:-:188:217	Nfyb:NM_010914:chr10:-:179:310	overlap.uORF	0.260188	0.276036	0.942587
NOTCH2:NM_001200001:chr1:-:242:394	Notch2:NM_010928:chr3:+:130:273	overlap.uORF	0.184572	0.197848	0.9329
NPAT:NM_002519:chr11:-:23:232	Npat:NM_001081152:chr9:+:23:232	overlap.uORF	0.16237	0.373264	0.434999
NR1H3:NM_001130101:chr11:+:126:281	Nr1h3:NM_001177730:chr2:-:167:220	overlap.uORF	0.117704	0.0735162	1.60106
NRAS:NM_002524:chr1:-:45:257	Nras:NM_010937:chr3:+:78:176	overlap.uORF	0.293042	0.276845	1.0585
NRBF2:NM_030759:chr10:+:169:351	Nrbf2:NM_001036293:chr10:-:103:282	overlap.uORF	0.162892	0.165284	0.985532
NSD1:NM_022455:chr5:+:70:198	Nsd1:NM_008739:chr13:+:85:171	overlap.uORF	0.195529	0.302407	0.646575
NSUN3:NM_022072:chr3:+:4:192	Nsun3:NM_178925:chr16:-:12:110	overlap.uORF	0.171703	0.251433	0.682897
NTF3:NM_001102654:chr12:+:146:241	Ntf3:NM_001164034:chr6:-:233:328	overlap.uORF	0.0525692	0.111844	0.470021
NUSAP1:NM_001243142:chr15:+:221:310	Nusap1:NM_001042652:chr2:+:414:542	overlap.uORF	0.393298	0.325605	1.2079
NXPE3:NM_001134456:chr3:+:930:1010	Nxpe3:NM_001134457:chr16:-:432:581	overlap.uORF	0.233715	0.259396	0.900997
OAZ2:NM_002537:chr15:-:196:237	Oaz2:NM_010952:chr9:+:179:220	overlap.uORF	0.0337576	0	NA
ORC2:NM_006190:chr2:-:242:274	Orc2:NM_001271526:chr1:-:362:394	overlap.uORF	0.179022	0.239138	0.748614
P2RX5:NM_001204519:chr17:-:350:757	P2rx5:NM_033321:chr11:+:15:242	overlap.uORF	0.370183	0.321879	1.15007
P2RX5:NM_001204520:chr17:-:350:691	P2rx5:NM_033321:chr11:+:15:242	overlap.uORF	0.380818	0.296431	1.28468
PAF1:NM_001256826:chr19:-:228:413	Paf1:NM_019458:chr7:+:13:285	overlap.uORF	0.367242	0.711637	0.516053
PAFAH2:NM_000437:chr1:-:175:234	Pafah2:NM_001285875:chr4:+:88:219	uORF	0.241698	0.264917	0.912354
PAIP2:NM_001033112:chr5:+:167:226	Paip2:NM_026420:chr18:+:31:147	overlap.uORF	0.135354	0.129756	1.04314
PAIP2:NM_016480:chr5:+:125:205	Paip2:NM_026420:chr18:+:31:147	overlap.uORF	0.0914652	0.107712	0.849167
PAPD4:NM_001114393:chr5:+:393:476	Papd4:NM_133905:chr13:-:202:285	overlap.uORF	0.103041	0.180734	0.570126
PAX3:NM_000438:chr2:-:347:448	Pax3:NM_001159520:chr1:-:128:640	overlap.uORF	0.0562072	0.0841168	0.668204
PAX9:NM_006194:chr14:+:526:750	Pax9:NM_011041:chr12:+:25:246	overlap.uORF	0.155992	0.279639	0.557835
PCF11:NM_015885:chr11:+:229:432	Pcf11:NM_029078:chr7:-:137:379	overlap.uORF	0.22749	0.14707	1.54682
PCIF1:NM_022104:chr20:+:270:362	Pcif1:NM_146129:chr2:+:267:359	overlap.uORF	0.137564	0.0702401	1.95849
PDE7B:NM_018945:chr6:+:203:322	Pde7b:NM_013875:chr10:-:272:391	overlap.uORF	0.0455016	0	NA
PDGFA:NM_002607:chr7:-:751:846	Pdgfa:NM_008808:chr5:-:90:185	overlap.uORF	0.0637615	0.0763188	0.835464
PEX2:NM_000318:chr8:-:343:528	Pex2:NM_001163305:chr3:-:546:659	overlap.uORF	0.409115	0.408988	1.00031
PEX2:NM_001172087:chr8:-:255:392	Pex2:NM_001163305:chr3:-:546:659	overlap.uORF	0.356597	0.322149	1.10693
PHF17:NM_024900:chr4:+:191:283	Jade1:NM_172303:chr3:+:4:213	overlap.uORF	0.421734	0.356191	1.18401
PHF20:NM_016436:chr20:+:47:130	Phf20:NM_172674:chr2:+:173:202	overlap.uORF	0.0991624	0	NA
PHF20L1:NM_016018:chr8:+:305:328	Phf20l1:NM_001081409:chr15:+:293:316	overlap.uORF	0	0	NA
PHF20L1:NM_198513:chr8:+:217:324	Phf20l1:NM_001081409:chr15:+:13:279	uORF	0.178624	0.211907	0.842932
PHLDA1:NM_007350:chr12:-:16:192	Phlda1:NM_009344:chr10:+:58:237	overlap.uORF	0.0764318	0.0535906	1.42622
PHTF1:NM_006608:chr1:-:325:465	Phtf1:NM_001163467:chr3:+:139:168	overlap.uORF	0	0	NA
PIDD:NM_145886:chr11:-:116:631	Lrdd:NM_022654:chr7:-:47:310	overlap.uORF	0.270693	0.516169	0.524427
PIKFYVE:NM_001178000:chr2:+:153:257	Pikfyve:NM_011086:chr1:+:153:257	overlap.uORF	0.127504	0.0406976	3.13296
PKIA:NM_006823:chr8:+:505:531	Pkia:NM_008862:chr3:+:1:183	overlap.uORF	0.0493005	0	NA
PLD5:NM_152666:chr1:-:219:287	Pld5:NM_176916:chr1:-:430:498	overlap.uORF	0.0207685	0	NA
PLEKHA1:NM_001001974:chr10:+:233:298	Plekha1:NM_133942:chr7:+:78:143	overlap.uORF	0.0629656	0.0790605	0.796423
PLEKHG3:NM_015549:chr14:+:237:320	Plekhg3:NM_153804:chr12:+:290:355	overlap.uORF	0.159615	0.143969	1.10868
PLEKHM2:NM_015164:chr1:+:192:245	Plekhm2:NM_001033150:chr4:-:160:213	overlap.uORF	0.28336	0.38378	0.738339
PLK4:NM_001190799:chr4:+:179:445	Plk4:NM_011495:chr3:+:215:340	overlap.uORF	0.553853	0.958142	0.578049
PLK4:NM_014264:chr4:+:179:400	Plk4:NM_011495:chr3:+:215:340	overlap.uORF	0.526225	0.69931	0.752491
POLD2:NM_001127218:chr7:-:213:299	Pold2:NM_008894:chr11:-:10:261	overlap.uORF	0.374496	0.60728	0.616678
POLG:NM_001126131:chr15:-:38:997	Polg:NM_017462:chr7:-:309:1040	overlap.uORF	0.10509	0.18353	0.572603
POLG:NM_002693:chr15:-:38:1009	Polg:NM_017462:chr7:-:309:1040	overlap.uORF	0.10509	0.18353	0.572603
POLR2M:NM_001018102:chr15:+:25:285	Polr2m:NM_178602:chr9:-:78:332	overlap.uORF	0.183007	0.364495	0.502082
POLR2M:NM_015532:chr15:+:25:285	Polr2m:NM_178602:chr9:-:78:332	overlap.uORF	0.0820777	0.325644	0.252048
PPARD:NM_001171818:chr6:+:364:717	Ppard:NM_011145:chr17:+:234:584	overlap.uORF	0.180007	0.11486	1.56719
PPARD:NM_001171820:chr6:+:268:495	Ppard:NM_011145:chr17:+:234:584	overlap.uORF	0.326058	0.573935	0.56811
PPIP5K1:NM_001130858:chr15:-:125:226	Ppip5k1:NM_178795:chr2:-:103:147	overlap.uORF	0.0641771	0.113632	0.564782
PPIP5K1:NM_001130859:chr15:-:150:221	Ppip5k1:NM_178795:chr2:-:103:147	overlap.uORF	0.0641771	0.113632	0.564782
PPM1F:NM_014634:chr22:-:136:249	Ppm1f:NM_176833:chr16:+:210:320	overlap.uORF	0.17042	0.364073	0.468093
PPP1R13B:NM_015316:chr14:-:26:286	Ppp1r13b:NM_011625:chr12:-:6:188	overlap.uORF	0.450879	0.484543	0.930525
PPP1R16A:NM_032902:chr8:+:357:590	Ppp1r16a:NM_033371:chr15:+:693:926	overlap.uORF	0.205189	0.118457	1.73219
PPP1R2:NM_006241:chr3:-:216:521	Ppp1r2:NM_025800:chr16:-:204:434	overlap.uORF	0.321797	0.300655	1.07032
PPP2CB:NM_001009552:chr8:-:68:466	Ppp2cb:NM_017374:chr8:+:198:347	overlap.uORF	0.425898	0.24783	1.71851
PPP2R3C:NM_017917:chr14:-:325:387	Ppp2r3c:NM_021529:chr12:-:213:263	overlap.uORF	0.19004	0.296218	0.641556
PPP3CA:NM_000944:chr4:-:602:697	Ppp3ca:NM_008913:chr3:+:16:96	overlap.uORF	0.156739	0.263398	0.595067
PPP6R1:NM_014931:chr19:-:196:258	Ppp6r1:NM_172894:chr7:-:430:492	overlap.uORF	0.0222568	0	NA
PRMT2:NM_001242864:chr21:+:202:381	Prmt2:NM_001077638:chr10:-:152:367	overlap.uORF	0.394619	0.519382	0.759786
PRPF19:NM_014502:chr11:-:19:216	Prpf19:NM_001253843:chr19:+:94:228	overlap.uORF	0.475297	0.558184	0.851506
PRRC2B:NM_013318:chr9:+:39:128	Prrc2b:NM_001159634:chr2:+:182:271	overlap.uORF	0.0303306	0	NA
PRRC2C:NM_015172:chr1:+:250:336	Prrc2c:NM_001081290:chr1:-:270:356	overlap.uORF	0.0454168	0	NA
PRSS12:NM_003619:chr4:-:19:111	Prss12:NM_008939:chr3:+:221:310	overlap.uORF	0.313168	0.295019	1.06152
PSEN1:NM_000021:chr14:+:220:336	Psen1:NM_008943:chr12:+:427:543	overlap.uORF	0.110296	0.219696	0.50204
PSMB2:NM_001199779:chr1:-:61:141	Psmb2:NM_011970:chr4:+:87:209	overlap.uORF	0.0658942	0.384545	0.171356
PSMD14:NM_005805:chr2:+:214:483	Psmd14:NM_021526:chr2:+:8:328	overlap.uORF	0.605668	0.760173	0.796749
PSMD1:NM_001191037:chr2:+:119:202	Psmd1:NM_027357:chr1:+:134:211	overlap.uORF	0.174986	0.196763	0.88932
PSME3:NM_005789:chr17:+:435:536	Psme3:NM_011192:chr11:+:33:242	overlap.uORF	0.107237	0.111537	0.961447
PSPC1:NM_001042414:chr13:-:84:140	Pspc1:NM_025682:chr14:-:29:160	overlap.uORF	0.498306	1.24628	0.399834
PTBP3:NM_001163788:chr9:-:187:249	Ptbp3:NM_178164:chr4:-:209:271	overlap.uORF	0.0451671	0.153913	0.293459
PTPRA:NM_002836:chr20:+:599:781	Ptpra:NM_001163688:chr2:+:238:339	overlap.uORF	0.731219	0.703585	1.03928
PTPRF:NM_002840:chr1:+:300:350	Ptprf:NM_011213:chr4:-:315:452	overlap.uORF	0.0844944	0	NA
PTPRG:NM_002841:chr3:+:703:843	Ptprg:NM_008981:chr14:+:679:789	overlap.uORF	0.0767971	0	NA
PTPRM:NM_001105244:chr18:+:280:591	Ptprm:NM_008984:chr17:-:12:518	overlap.uORF	0.415924	0.585733	0.71009
PUS7:NM_019042:chr7:-:197:280	Pus7:NM_001289780:chr5:-:210:284	overlap.uORF	0.176175	0.238592	0.738391
PXDC1:NM_183373:chr6:-:470:517	Pxdc1:NM_025831:chr13:-:163:282	overlap.uORF	0.136865	0.080987	1.68996
RAB27B:NM_004163:chr18:+:185:262	Rab27b:NM_030554:chr18:-:139:270	overlap.uORF	0.370832	0.428248	0.865929
RAB31:NM_006868:chr18:+:138:269	Rab31:NM_133685:chr17:-:171:302	overlap.uORF	0.0992332	0.133955	0.740796
RAP1A:NM_002884:chr1:+:43:186	Rap1a:NM_145541:chr3:-:7:177	overlap.uORF	0.595384	0.996288	0.597602
RAP2A:NM_021033:chr13:+:209:292	Rap2a:NM_029519:chr14:+:225:308	overlap.uORF	0.0169868	0	NA
RBBP5:NM_001193272:chr1:-:81:152	Rbbp5:NM_172517:chr1:+:86:145	overlap.uORF	0.192477	0.309686	0.621522
RBBP7:NM_002893:chrX:-:81:368	Rbbp7:NM_009031:chrX:+:32:265	uORF	0.34663	0.463015	0.748637
RBCK1:NM_031229:chr20:+:674:763	Rbck1:NM_001083921:chr2:-:351:440	overlap.uORF	0.132907	0	NA
RCBTB2:NM_001268:chr13:-:361:486	Rcbtb2:NM_001170694:chr14:+:252:398	overlap.uORF	0.106801	0.0564899	1.89062
RELL2:NM_001130029:chr5:+:697:867	Rell2:NM_153793:chr18:+:250:426	overlap.uORF	0.0426644	0.191014	0.223358
RELL2:NM_173828:chr5:+:1248:1295	Rell2:NM_153793:chr18:+:250:426	overlap.uORF	0	0	NA
REV1:NM_001037872:chr2:-:30:215	Rev1:NM_019570:chr1:-:176:214	overlap.uORF	0.118222	0	NA
RHOBTB2:NM_015178:chr8:+:461:547	Rhobtb2:NM_153514:chr14:-:443:529	overlap.uORF	0.0808479	0.250827	0.322326
RHOQ:NM_012249:chr2:+:293:343	Rhoq:NM_145491:chr17:+:469:519	overlap.uORF	0.0306517	0.0712911	0.429952
RIOK3:NM_003831:chr18:+:564:629	Riok3:NM_024182:chr18:+:17:166	overlap.uORF	0.105783	0.378523	0.279462
RNF10:NM_014868:chr12:+:368:628	Rnf10:NM_016698:chr5:-:1:627	overlap.uORF	0.0164276	0.0420437	0.390726
RNF111:NM_001270528:chr15:+:286:441	Rnf111:NM_033604:chr9:-:240:368	overlap.uORF	0.664908	1.11713	0.595191
RNF123:NM_022064:chr3:+:119:172	Rnf123:NM_032543:chr9:-:194:247	overlap.uORF	0.170401	0	NA
RNF2:NM_007212:chr1:+:78:272	Rnf2:NM_011277:chr1:-:27:146	overlap.uORF	0.0999812	0.178139	0.561254
ROBO1:NM_001145845:chr3:-:966:1001	Robo1:NM_019413:chr16:+:959:994	overlap.uORF	0.0910958	0.111091	0.820014
RPS6KC1:NM_001136138:chr1:+:116:250	Rps6kc1:NM_178775:chr1:-:73:201	overlap.uORF	0.188975	0.18712	1.00992
RTN2:NM_005619:chr19:-:153:416	Rtn2:NM_013648:chr7:+:131:394	overlap.uORF	0.0822721	0.0451295	1.82302
RUSC2:NM_001135999:chr9:+:493:576	Rusc2:NM_001037709:chr4:+:234:317	overlap.uORF	0.126268	0.103088	1.22486
SAMD4B:NM_018028:chr19:+:932:1090	Samd4b:NM_175021:chr7:-:58:294	overlap.uORF	0.0532159	0.0841915	0.632082
SAT1:NM_002970:chrX:+:120:209	Sat1:NM_009121:chrX:-:167:301	overlap.uORF	0.034454	0.15036	0.229143
SATB2:NM_001172509:chr2:-:612:1037	Satb2:NM_139146:chr1:-:227:502	overlap.uORF	0.0638819	0.0264206	2.41789
SBDS:NM_016038:chr7:-:35:220	Sbds:NM_023248:chr5:-:9:161	overlap.uORF	0.568386	0.557777	1.01902
SCAP:NM_012235:chr3:-:212:268	Scap:NM_001001144:chr9:+:205:240	uORF	0.0406795	0	NA
SCMH1:NM_001172220:chr1:-:202:438	Scmh1:NM_001159630:chr4:+:292:483	overlap.uORF	0.438404	0.780113	0.561976
SCNN1G:NM_001039:chr16:+:27:215	Scnn1g:NM_011326:chr7:+:41:145	overlap.uORF	0.259926	0.127392	2.04036
SCRN3:NM_024583:chr2:+:28:117	Scrn3:NM_029022:chr2:+:33:83	overlap.uORF	0.553073	1.01329	0.545817
SEC14L1:NM_001039573:chr17:+:268:369	Sec14l1:NM_001166506:chr11:+:170:247	overlap.uORF	0.183128	0.588844	0.310995
SEC22C:NM_001201572:chr3:-:36:215	Sec22c:NM_001164562:chr9:-:114:200	overlap.uORF	0.156479	0.0510161	3.06725
SEC22C:NM_001201584:chr3:-:191:277	Sec22c:NM_001164562:chr9:-:114:200	overlap.uORF	0.156479	0.0510161	3.06725
SEC63:NM_007214:chr6:-:199:297	Sec63:NM_153055:chr10:+:109:297	overlap.uORF	0.178678	0.127004	1.40688
SEMA3A:NM_006080:chr7:-:196:327	Sema3a:NM_009152:chr5:+:530:745	overlap.uORF	0.0592535	0.0476902	1.24247
SENP5:NM_152699:chr3:+:236:304	Senp5:NM_177103:chr16:-:314:382	overlap.uORF	0.0183277	0.213403	0.0858831
SEPW1:NM_003009:chr19:+:183:239	Sepw1:NM_009156:chr7:-:76:129	overlap.uORF	0.133087	0.715303	0.186057
SERPINB7:NM_001261830:chr18:+:35:166	Serpinb7:NM_027548:chr1:+:30:161	overlap.uORF	0.21899	0.194018	1.12871
SERPINB7:NM_001261831:chr18:+:334:459	Serpinb7:NM_027548:chr1:+:30:161	overlap.uORF	0.315976	0.333195	0.948323
SH2B1:NM_001145795:chr16:+:183:275	Sh2b1:NM_001289539:chr7:-:129:221	overlap.uORF	0.100274	0.332311	0.301747
SH2B1:NM_001145812:chr16:+:291:374	Sh2b1:NM_001289539:chr7:-:129:221	overlap.uORF	0.114108	0.363166	0.314203
SH2B1:NM_015503:chr16:+:1992:2105	Sh2b1:NM_001289539:chr7:-:129:221	overlap.uORF	0.138113	0.324414	0.425731
SIAH2:NM_005067:chr3:-:608:661	Siah2:NM_009174:chr3:-:554:607	overlap.uORF	0	0.168395	0
SIPA1:NM_006747:chr11:+:130:231	Sipa1:NM_001164480:chr19:-:223:324	overlap.uORF	0.0730716	0.0774286	0.943729
SIPA1:NM_153253:chr11:+:55:360	Sipa1:NM_001164480:chr19:-:223:324	overlap.uORF	0.0730716	0.0774286	0.943729
SLC12A2:NM_001046:chr5:+:10:339	Slc12a2:NM_009194:chr18:+:5:490	overlap.uORF	0.577802	0.55311	1.04464
SLC25A19:NM_001126121:chr17:-:196:237	Slc25a19:NM_001252384:chr11:-:404:445	overlap.uORF	0.147165	0.119311	1.23346
SLC35C1:NM_001145265:chr11:+:404:613	Slc35c1:NM_211358:chr2:-:505:987	overlap.uORF	0.305724	0.327206	0.934348
SLC37A4:NM_001164277:chr11:-:596:793	Slc37a4:NM_008063:chr9:+:126:224	uORF	0.413933	0.751203	0.551027
SLC39A11:NM_001159770:chr17:-:69:215	Slc39a11:NM_001166503:chr11:-:105:437	overlap.uORF	0.0928623	0.0438285	2.11877
SLC39A13:NM_001128225:chr11:+:127:597	Slc39a13:NM_026721:chr2:-:8:223	overlap.uORF	0.113141	0.247552	0.45704
SLC39A13:NM_152264:chr11:+:127:618	Slc39a13:NM_026721:chr2:-:8:223	overlap.uORF	0.1966	0.324958	0.605001
SMAD7:NM_001190821:chr18:-:219:563	Smad7:NM_001042660:chr18:+:1421:1867	overlap.uORF	0.0691406	0.062695	1.10281
SMC6:NM_024624:chr2:-:130:246	Smc6:NM_025695:chr12:+:17:445	overlap.uORF	0.312913	0.412088	0.759336
SMCR8:NM_144775:chr17:+:485:526	Smcr8:NM_001085440:chr11:+:478:519	overlap.uORF	0.195848	0.248518	0.788063
SMOC1:NM_001034852:chr14:+:115:387	Smoc1:NM_001146217:chr12:+:220:357	overlap.uORF	0.122357	0.21421	0.571202
SMS:NM_001258423:chrX:+:229:321	Sms:NM_009214:chrX:-:70:162	overlap.uORF	0.0621	0.0450229	1.3793
SMUG1:NM_001243787:chr12:-:139:273	Smug1:NM_027885:chr15:-:346:465	overlap.uORF	0.432618	0.46756	0.925266
SNRNP25:NM_024571:chr16:+:123:260	Snrnp25:NM_030093:chr11:+:148:258	overlap.uORF	0.175821	0.130446	1.34784
SNRNP70:NM_003089:chr19:+:270:488	Snrnp70:NM_009224:chr7:-:4:123	uORF	0.449227	0.527667	0.851345
SNX1:NM_001242933:chr15:+:96:155	Snx1:NM_019727:chr9:-:63:146	overlap.uORF	0.0742253	0.151846	0.48882
SPAST:NM_014946:chr2:+:193:360	Spast:NM_001162870:chr17:+:22:183	overlap.uORF	0.149176	0.21697	0.687543
SPATS2:NM_023071:chr12:+:801:1085	Spats2:NM_139140:chr15:+:223:411	overlap.uORF	0.345597	0.318742	1.08425
SPG21:NM_001127890:chr15:-:230:286	Spg21:NM_138584:chr9:+:37:273	overlap.uORF	0.19985	0.340601	0.586756
SPRY2:NM_005842:chr13:-:338:439	Spry2:NM_011897:chr14:-:240:341	overlap.uORF	0.0565492	0.127614	0.443125
SPRYD3:NM_032840:chr12:-:32:136	Spryd3:NM_001033277:chr15:-:2:106	overlap.uORF	0.0391828	0.0906693	0.43215
SPSB2:NM_001146316:chr12:-:23:220	Spsb2:NM_013539:chr6:+:42:284	overlap.uORF	0.561804	0.59194	0.949089
SSR1:NM_003144:chr6:-:111:191	Ssr1:NM_025965:chr13:-:31:222	overlap.uORF	0.341474	0.237191	1.43966
SSTR1:NM_001049:chr14:+:331:660	Sstr1:NM_009216:chr12:+:136:333	uORF	0.496682	0.858603	0.578476
STAT6:NM_003153:chr12:-:128:400	Stat6:NM_009284:chr10:+:41:247	uORF	0.448581	0.331829	1.35184
STAU2:NM_001164380:chr8:-:286:318	Stau2:NM_001111272:chr1:-:96:191	overlap.uORF	0.0902419	0	NA
STAU2:NM_001164380:chr8:-:306:380	Stau2:NM_025303:chr1:-:179:253	overlap.uORF	0.0354849	0.246207	0.144126
STEAP2:NM_001040665:chr7:+:8:187	Steap2:NM_001285470:chr5:-:94:183	overlap.uORF	0.550364	0.811959	0.677822
STK16:NM_001008910:chr2:+:143:265	Stk16:NM_001277992:chr1:+:1:393	overlap.uORF	0.057806	0.106837	0.541068
STRAP:NM_007178:chr12:+:265:363	Strap:NM_011499:chr6:+:127:282	overlap.uORF	0.313166	0.690216	0.453722
STRBP:NM_018387:chr9:-:335:433	Strbp:NM_009261:chr2:-:72:170	overlap.uORF	0.0545361	0.16778	0.325045
STX5:NM_001244666:chr11:-:147:185	Stx5a:NM_019829:chr19:+:427:498	overlap.uORF	0.0805153	0.10965	0.734292
STX7:NM_003569:chr6:-:222:278	Stx7:NM_016797:chr10:+:447:536	overlap.uORF	0.282541	0.328481	0.860144
SUCO:NM_014283:chr1:+:278:319	Suco:NM_172645:chr1:-:251:292	overlap.uORF	0	0.102411	0
SUV420H1:NM_016028:chr11:-:228:323	Suv420h1:NM_001167884:chr19:+:1039:1134	overlap.uORF	0.0423946	0	NA
SYTL1:NM_001193308:chr1:+:91:276	Sytl1:NM_031393:chr4:-:111:218	overlap.uORF	0.175423	0.0362185	4.84346
TAF1C:NM_001243156:chr16:-:85:312	Taf1c:NM_021441:chr8:-:37:144	overlap.uORF	0.492612	0.738128	0.66738
TANK:NM_001199135:chr2:+:88:189	Tank:NM_001164071:chr2:+:346:447	overlap.uORF	0.0785561	0	NA
TASP1:NM_017714:chr20:-:101:187	Tasp1:NM_001159640:chr2:-:104:190	overlap.uORF	0.0851817	0.264634	0.321885
TATDN2:NM_014760:chr3:+:549:746	Tatdn2:NM_001033463:chr6:+:77:274	overlap.uORF	0.0980453	0.321434	0.305024
TBC1D14:NM_001113361:chr4:+:38:82	Tbc1d14:NM_133910:chr5:-:19:63	overlap.uORF	0	0.48567	0
TBC1D16:NM_019020:chr17:-:87:170	Tbc1d16:NM_172443:chr11:-:142:216	overlap.uORF	0.12343	0.242876	0.508199
TBC1D22A:NM_014346:chr22:+:153:266	Tbc1d22a:NM_145476:chr15:+:103:216	overlap.uORF	0.0890841	0	NA
TBCCD1:NM_001134415:chr3:-:439:510	Tbccd1:NM_001081368:chr16:-:227:298	overlap.uORF	0.180807	0.349871	0.516781
THAP2:NM_031435:chr12:+:596:805	Thap2:NM_025780:chr10:-:143:352	overlap.uORF	0.0466731	0.059667	0.782225
THAP7:NM_001008695:chr22:-:19:282	Thap7:NM_026909:chr16:-:17:280	overlap.uORF	0.0777312	0.0432411	1.79762
THAP7:NM_030573:chr22:-:40:456	Thap7:NM_026909:chr16:-:17:280	overlap.uORF	0.104933	0.0502032	2.09016
THOC5:NM_001002877:chr22:-:103:243	Thoc5:NM_172438:chr11:+:0:95	overlap.uORF	0.623351	0.693015	0.899477
THOC5:NM_001002879:chr22:-:166:258	Thoc5:NM_172438:chr11:+:0:95	overlap.uORF	0.556152	0.62391	0.891397
THOC5:NM_003678:chr22:-:53:127	Thoc5:NM_172438:chr11:+:0:95	overlap.uORF	0.399668	0.268332	1.48946
THSD1:NM_018676:chr13:-:508:597	Thsd1:NM_019576:chr8:+:175:264	overlap.uORF	0.16675	0	NA
TICAM1:NM_182919:chr19:-:167:313	Ticam1:NM_174989:chr17:-:76:243	overlap.uORF	0.530716	0.741515	0.715719
TIMELESS:NM_003920:chr12:-:164:193	Timeless:NM_011589:chr10:+:26:148	overlap.uORF	0.104446	0	NA
TIRAP:NM_001039661:chr11:+:326:490	Tirap:NM_001177845:chr9:-:423:566	overlap.uORF	0.382802	0.67895	0.563815
TJAP1:NM_001146016:chr6:+:80:379	Tjap1:NM_028751:chr17:-:43:435	overlap.uORF	0.514186	0.532746	0.965161
TJAP1:NM_001146017:chr6:+:225:344	Tjap1:NM_028751:chr17:-:202:435	overlap.uORF	0.655205	1.52004	0.431044
TJAP1:NM_001146018:chr6:+:287:436	Tjap1:NM_028751:chr17:-:202:435	overlap.uORF	0.763007	1.37725	0.554008
TJAP1:NM_001146020:chr6:+:90:230	Tjap1:NM_028751:chr17:-:202:435	overlap.uORF	0.581503	1.36869	0.424861
TMEM104:NM_017728:chr17:+:5:172	Tmem104:NM_001033393:chr11:+:7:336	overlap.uORF	0.433761	0.639551	0.678227
TMEM106C:NM_001143841:chr12:+:90:176	Tmem106c:NM_001252153:chr15:+:110:169	overlap.uORF	0.249178	0.342447	0.727639
TMEM150A:NM_001031738:chr2:-:106:348	Tmem150a:NM_144916:chr6:+:75:182	overlap.uORF	0.539433	0.600881	0.897738
TMEM170A:NM_145254:chr16:-:75:146	Tmem170:NM_025781:chr8:-:29:106	overlap.uORF	0.106552	0.0555938	1.91663
TMEM183A:NM_138391:chr1:+:25:84	Tmem183a:NM_001042485:chr1:-:67:153	overlap.uORF	0.170172	0.193491	0.879485
TMEM203:NM_053045:chr9:-:64:393	Tmem203:NM_177344:chr2:+:40:351	overlap.uORF	0.640356	1.29847	0.493164
TMEM208:NM_014187:chr16:+:36:155	Tmem208:NM_025486:chr8:+:35:154	overlap.uORF	0.175774	0.438792	0.400586
TMEM218:NM_001080546:chr11:-:362:637	Tmem218:NM_025464:chr9:+:52:183	overlap.uORF	0.361571	0.187566	1.9277
TMEM218:NM_001258238:chr11:-:222:515	Tmem218:NM_025464:chr9:+:52:183	overlap.uORF	0.361571	0.187566	1.9277
TMEM218:NM_001258247:chr11:-:213:491	Tmem218:NM_025464:chr9:+:52:183	overlap.uORF	0.361571	0.187566	1.9277
TMEM230:NM_001009923:chr20:-:127:291	Tmem230:NM_001141971:chr2:-:163:222	overlap.uORF	0.160738	0.0843864	1.90479
TMEM230:NM_001009925:chr20:-:54:185	Tmem230:NM_001141971:chr2:-:163:222	overlap.uORF	0.160738	0.0843864	1.90479
TMEM230:NM_014145:chr20:-:360:416	Tmem230:NM_001141971:chr2:-:163:222	overlap.uORF	0.160738	0.0843864	1.90479
TMEM39A:NM_018266:chr3:-:301:402	Tmem39a:NM_001205286:chr16:+:77:178	overlap.uORF	0.145384	0.383094	0.379498
TMEM50B:NM_006134:chr21:-:185:232	Tmem50b:NM_030018:chr16:-:112:159	overlap.uORF	0.309607	0.408807	0.757343
TMEM60:NM_032936:chr7:-:82:312	Tmem60:NM_177601:chr5:+:108:338	overlap.uORF	0.162983	0.133243	1.2232
TNPO2:NM_001136195:chr19:-:291:458	Tnpo2:NM_001122843:chr8:+:34:237	overlap.uORF	0.361472	0.350207	1.03217
TRAK2:NM_015049:chr2:-:298:489	Trak2:NM_172406:chr1:-:296:487	overlap.uORF	0.105789	0.453943	0.233046
TRIB3:NM_021158:chr20:+:343:573	Trib3:NM_175093:chr2:-:119:235	overlap.uORF	0.398064	0.642218	0.619827
TRIM41:NM_033549:chr5:+:522:755	Trim41:NM_145377:chr11:-:518:754	overlap.uORF	0.378093	0.523789	0.721842
TRIP12:NM_004238:chr2:-:63:125	Trip12:NM_133975:chr1:-:79:141	overlap.uORF	0	0	NA
TRIQK:NM_001171799:chr8:-:55:186	Triqk:NM_001171801:chr4:+:196:333	overlap.uORF	0.629141	1.06488	0.590807
TRPM7:NM_017672:chr15:-:98:487	Trpm7:NM_001164325:chr2:-:104:490	overlap.uORF	0.0733499	0.0876878	0.836489
TRPT1:NM_001033678:chr11:-:66:263	Trpt1:NM_153597:chr19:+:312:368	overlap.uORF	0.303259	0.500121	0.606372
TRPT1:NM_001160390:chr11:-:66:251	Trpt1:NM_153597:chr19:+:312:368	overlap.uORF	0.280578	0.444696	0.630943
TSPAN5:NM_005723:chr4:-:422:463	Tspan5:NM_019571:chr3:+:372:413	overlap.uORF	0	0	NA
TTC7A:NM_020458:chr2:+:348:401	Ttc7:NM_028639:chr17:+:225:371	overlap.uORF	0	0.549524	0
TTLL4:NM_014640:chr2:+:338:517	Ttll4:NM_001014974:chr1:+:365:544	overlap.uORF	0.12559	0.198725	0.63198
TTLL5:NM_015072:chr14:+:256:330	Ttll5:NM_001081423:chr12:+:216:374	overlap.uORF	0.119738	0.0584493	2.04858
TUBG2:NM_016437:chr17:+:210:392	Tubg2:NM_134028:chr11:+:61:318	overlap.uORF	0.260669	0.12599	2.06897
TWSG1:NM_020648:chr18:+:144:194	Twsg1:NM_023053:chr17:-:3:161	overlap.uORF	0.292099	0.720346	0.405497
UBE2D3:NM_003340:chr4:-:457:504	Ube2d3:NM_025356:chr3:+:209:256	overlap.uORF	0.125181	0	NA
UBE2E1:NM_003341:chr3:+:78:239	Ube2e1:NM_009455:chr14:-:40:201	overlap.uORF	0.0347495	0.0765908	0.453703
UBE2K:NM_001111112:chr4:+:171:335	Ube2k:NM_016786:chr5:+:107:274	overlap.uORF	0.0256222	0.048129	0.532364
UBE2Q2:NM_173469:chr15:+:375:416	Ube2q2:NM_180600:chr9:+:255:296	overlap.uORF	0	0	NA
UBE3A:NM_000462:chr15:-:694:720	Ube3a:NM_011668:chr7:+:677:703	overlap.uORF	0	0	NA
UBE3B:NM_001270449:chr12:+:553:657	Ube3b:NM_054093:chr5:+:465:653	overlap.uORF	0.148755	0	NA
UBL3:NM_007106:chr13:-:958:1155	Ubl3:NM_011908:chr5:-:676:840	overlap.uORF	0.345128	0.422462	0.816945
UCK1:NM_001135954:chr9:-:79:222	Uck2:NM_030724:chr1:-:21:368	overlap.uORF	0.550055	0.855602	0.642886
UQCC:NM_001184977:chr20:-:163:204	Uqcc1:NM_018888:chr2:-:258:299	overlap.uORF	0.0888291	0.0566958	1.56677
USB1:NM_001195302:chr16:+:101:160	Usb1:NM_133954:chr8:+:62:127	overlap.uORF	0.103751	0.066482	1.56059
USP19:NM_001199160:chr3:-:294:383	Usp19:NM_001168371:chr9:+:331:420	overlap.uORF	0.1898	0.0482435	3.93421
USP38:NM_032557:chr4:+:383:661	Usp38:NM_027554:chr8:-:325:597	overlap.uORF	0.163211	0.10864	1.5023
USP6NL:NM_014688:chr10:-:241:324	Usp6nl:NM_001080548:chr2:+:206:289	overlap.uORF	0.180367	0.262696	0.6866
UST:NM_005715:chr6:+:204:299	Ust:NM_177387:chr10:-:334:429	overlap.uORF	0.185719	0.274073	0.677625
UVRAG:NM_003369:chr11:+:194:244	Uvrag:NM_178635:chr7:-:147:197	overlap.uORF	0.174826	0.85632	0.20416
VAMP4:NM_001185127:chr1:-:78:395	Vamp4:NM_016796:chr1:+:68:136	overlap.uORF	0.341621	0.672439	0.508033
VCP:NM_007126:chr9:-:268:417	Vcp:NM_009503:chr4:-:169:357	overlap.uORF	0.433218	0.507412	0.85378
VEZT:NM_017599:chr12:+:92:121	Vezt:NM_172538:chr10:-:30:59	overlap.uORF	0	0	NA
VWA9:NM_001207058:chr15:-:8:295	Vwa9:NM_001077631:chr9:+:317:535	overlap.uORF	0.713232	1.27856	0.55784
WBP4:NM_007187:chr13:+:16:153	Wbp4:NM_018765:chr14:-:101:376	overlap.uORF	0.484483	0.431136	1.12374
WDFY2:NM_052950:chr13:+:204:569	Wdfy2:NM_175546:chr14:+:110:334	overlap.uORF	0.306698	0.240207	1.27681
WDR20:NM_001242414:chr14:+:53:112	Wdr20:NM_027149:chr12:+:61:120	overlap.uORF	0	0	NA
WDR45:NM_001029896:chrX:-:83:175	Wdr45:NM_172372:chrX:+:7:273	overlap.uORF	0.480057	0.790246	0.607478
WDR89:NM_001008726:chr14:-:265:420	Wdr89:NM_028203:chr12:-:82:183	overlap.uORF	0.253261	0.326446	0.775813
WIPF2:NM_133264:chr17:+:175:327	Wipf2:NM_197940:chr11:+:309:431	overlap.uORF	0.563542	0.391316	1.44012
WNT7A:NM_004625:chr3:-:229:420	Wnt7a:NM_009527:chr6:-:184:375	overlap.uORF	0.0927928	0.126576	0.733099
XPO1:NM_003400:chr2:-:585:743	Xpo1:NM_001035226:chr11:+:88:252	overlap.uORF	0.933382	0.810887	1.15106
XPR1:NM_001135669:chr1:+:110:259	Xpr1:NM_011273:chr1:-:125:277	overlap.uORF	0.0484226	0.0512496	0.944839
XRCC2:NM_005431:chr7:-:33:158	Xrcc2:NM_020570:chr5:-:70:153	overlap.uORF	0.315301	0.0936032	3.36849
YEATS4:NM_006530:chr12:+:190:252	Yeats4:NM_026570:chr10:-:167:229	overlap.uORF	0.125535	0.130104	0.964882
YES1:NM_005433:chr18:-:190:234	Yes1:NM_009535:chr5:+:596:688	overlap.uORF	0.405476	0.565405	0.717143
YTHDF1:NM_017798:chr20:-:287:340	Ythdf1:NM_173761:chr2:-:219:272	overlap.uORF	0.0252688	0	NA
ZBTB41:NM_194314:chr1:-:35:103	Zbtb41:NM_172643:chr1:+:124:192	overlap.uORF	0.0781403	0.186769	0.418379
ZBTB4:NM_001128833:chr17:-:222:314	Zbtb4:NM_029348:chr11:+:135:314	overlap.uORF	0.0946773	0.0944225	1.0027
ZBTB4:NM_020899:chr17:-:226:390	Zbtb4:NM_029348:chr11:+:135:314	overlap.uORF	0.363159	0.464758	0.781394
ZC3H7A:NM_014153:chr16:-:155:298	Zc3h7a:NM_145931:chr16:-:194:253	overlap.uORF	0.148177	0.182001	0.814152
ZDHHC3:NM_001135179:chr3:-:65:277	Zdhhc3:NM_026917:chr9:-:66:230	uORF	0.483251	0.880262	0.548986
ZDHHC5:NM_015457:chr11:+:1221:1328	Zdhhc5:NM_144887:chr2:-:1198:1305	overlap.uORF	0.123846	0	NA
ZDHHC8:NM_001185024:chr22:+:85:339	Zdhhc8:NM_172151:chr16:-:104:379	overlap.uORF	0.0901519	0	NA
ZFAND5:NM_001102421:chr9:-:503:577	Zfand5:NM_009551:chr19:+:233:490	overlap.uORF	0.37173	0.555215	0.669524
ZFYVE1:NM_021260:chr14:-:699:803	Zfyve1:NM_183154:chr12:-:535:675	overlap.uORF	0.275233	0.185824	1.48115
ZNF185:NM_001178106:chrX:+:8:118	Zfp185:NM_001109043:chrX:+:188:280	overlap.uORF	0.70023	0.857234	0.816848
ZNF192:NM_006298:chr6:+:48:191	Zkscan8:NM_001251833:chr13:-:20:337	overlap.uORF	0.508388	0.78236	0.649813
ZNF219:NM_001101672:chr14:-:163:432	Zfp219:NM_001253694:chr14:-:283:564	overlap.uORF	0.169822	0.194745	0.872021
ZNF219:NM_001102454:chr14:-:189:422	Zfp219:NM_001253694:chr14:-:283:564	overlap.uORF	0.210876	0.201505	1.0465
ZNF248:NM_001267597:chr10:-:138:329	Zfp248:NM_028335:chr6:-:193:477	overlap.uORF	0.258698	0.248073	1.04283
ZNF263:NM_005741:chr16:+:94:426	Zfp263:NM_148924:chr16:+:245:376	overlap.uORF	0.299233	0.232636	1.28627
ZNF35:NM_003420:chr3:+:159:224	Zfp105:NM_009544:chr9:+:179:244	overlap.uORF	0.355494	0.875472	0.40606
ZNF382:NM_032825:chr19:+:105:281	Zfp382:NM_001081007:chr7:+:46:351	overlap.uORF	0.319753	0.277148	1.15373
ZNF503:NM_032772:chr10:-:1:339	Zfp503:NM_145459:chr14:-:997:1368	overlap.uORF	0.249542	0.358478	0.696117
ZNF524:NM_153219:chr19:+:34:348	Zfp524:NM_025324:chr7:+:42:338	overlap.uORF	0.192332	0.0984037	1.95452
ZNF558:NM_144693:chr19:-:61:324	Zfp558:NM_028935:chr9:-:398:463	overlap.uORF	0.503531	1.01483	0.496173
ZNF561:NM_152289:chr19:-:174:263	Zfp266:NM_001082485:chr9:-:415:486	overlap.uORF	0.426217	0.315578	1.35059
ZNF644:NM_016620:chr1:-:216:281	Zfp644:NM_026856:chr5:-:237:344	overlap.uORF	0.315886	0.290979	1.0856
ZNF644:NM_032186:chr1:-:222:311	Zfp644:NM_026856:chr5:-:237:344	overlap.uORF	0.0816143	0.0461491	1.76849
ZNF646:NM_014699:chr16:+:135:404	Zfp646:NM_172749:chr7:+:321:524	overlap.uORF	0.556822	1.05478	0.527903
ZNF655:NM_001009958:chr7:+:195:293	Zfp655:NM_001083958:chr5:+:22:216	overlap.uORF	0.342688	0.204788	1.67338
ZNF703:NM_025069:chr8:+:31:222	Zfp703:NM_001101502:chr8:+:5:43	overlap.uORF	0	0	NA
ZNF76:NM_003427:chr6:+:176:232	Zfp523:NM_172617:chr17:+:299:355	overlap.uORF	0.127154	0.481946	0.263834
ZNF821:NM_001201552:chr16:-:190:486	Zfp821:NM_001167946:chr8:+:19:519	uORF	0.83764	1.12825	0.742424
ZNF821:NM_001201553:chr16:-:247:471	Zfp821:NM_001286393:chr8:+:120:521	uORF	0.252798	0.287694	0.878706

## Sheet: dORF
Human ORF ID	Mouse ORF ID	Mouse ORF type	Ka	Ks	Ka/Ks
AAK1:NM_014911:chr2:-:12926:13834	Aak1:NM_001040106:chr6:+:12016:13080	dORF	0.185685	0.70481	0.263454
ACTB:NM_001101:chr7:-:1276:1617	Actb:NM_007393:chr5:-:1425:1625	dORF	0.668624	0.669336	0.998936
AKAP7:NM_004842:chr6:+:1299:1532	Akap7:NM_018747:chr10:-:1866:2015	dORF	0.171249	0.429331	0.398875
AKIRIN1:NM_001136275:chr1:+:596:787	Akirin1:NM_023423:chr4:-:726:917	dORF	0.0348511	0	NA
ANAPC16:NM_001242546:chr10:+:1148:1231	Anapc16:NM_025514:chr10:-:944:1054	dORF	0.278898	0.465397	0.599269
ANKHD1:NM_017747:chr5:+:7725:7787	Ankhd1:NM_175375:chr18:+:7724:7786	dORF	0	0	NA
ARF1:NM_001024226:chr1:+:801:968	Arf1:NM_001130408:chr11:-:923:1045	dORF	0.462475	0.82947	0.557555
ARHGDIA:NM_001185077:chr17:-:917:1417	Arhgdia:NM_133796:chr11:-:668:859	dORF	0.559232	0.756414	0.73932
ARHGEF1:NM_004706:chr19:+:2781:3173	Arhgef1:NM_001130150:chr7:+:3097:3423	dORF	0.783646	0.929269	0.843293
ARPC4:NM_001024959:chr3:+:757:864	Arpc4:NM_001170485:chr6:+:410:589	dORF	0.431737	0.464256	0.929955
ARSJ:NM_024590:chr4:-:2806:2955	Arsj:NM_173451:chr3:+:2826:2966	dORF	0.632826	1.71899	0.368137
ASB5:NM_080874:chr4:-:1001:1111	Asb5:NM_029569:chr8:+:992:1129	dORF	0.210804	0.173201	1.2171
ATOH8:NM_032827:chr2:+:1472:1786	Atoh8:NM_153778:chr6:-:1428:1778	dORF	0.703171	0.981016	0.716778
ATP5J:NM_001003696:chr21:-:694:795	Atp5j:NM_016755:chr16:-:689:739	dORF	0.184202	0.202629	0.90906
ATP6V0E2:NM_001100592:chr7:+:1325:1708	Atp6v0e2:NM_133764:chr6:+:613:906	dORF	1.04015	1.72556	0.60279
BAX:NM_138761:chr19:+:644:685	Bax:NM_007527:chr7:-:629:739	dORF	0.114545	0.348666	0.328524
BCL7B:NM_001197244:chr7:-:809:1039	Bcl7b:NM_009745:chr5:+:924:1076	dORF	0.800093	0.736202	1.08678
BET1L:NM_001098787:chr11:-:610:864	Bet1l:NM_018742:chr7:-:692:874	dORF	0.585469	0.932829	0.627627
BTF3L4:NM_001136497:chr1:+:622:726	Btf3l4:NM_027453:chr4:-:572:661	dORF	0.638273	0.712947	0.89526
BTG1:NM_001731:chr12:-:892:1014	Btg1:NM_007569:chr10:+:874:981	dORF	0.0120383	0.0568556	0.211735
C11orf10:NM_014206:chr11:-:316:408	Tmem258:NM_001163431:chr19:+:307:438	dORF	0.548454	0.469237	1.16882
C11orf48:NM_024099:chr11:-:607:1086	LOC102308570:NM_001286103:chr19:+:440:910	dORF	0.156527	0.489316	0.31989
C14orf119:NM_017924:chr14:+:612:920	1700123O20Rik:NM_021437:chr14:+:1671:1754	dORF	0.46594	0.455191	1.02361
C19orf43:NM_024038:chr19:-:585:638	2310036O22Rik:NM_026760:chr8:+:584:634	dORF	0.273629	0.391828	0.69834
C19orf43:NM_024038:chr19:-:646:888	2310036O22Rik:NM_026760:chr8:+:625:870	dORF	0.483844	0.537154	0.900754
C1orf109:NM_017850:chr1:-:720:842	9930104L06Rik:NM_177573:chr4:+:843:974	dORF	0.570877	0.845872	0.674897
C1orf122:NM_001142726:chr1:+:931:1152	1110065P20Rik:NM_001142727:chr4:-:508:603	dORF	0.12607	0.368157	0.342435
C1orf212:NM_001164824:chr1:-:673:825	Smim12:NM_030252:chr4:+:398:634	dORF	0.48833	0.761332	0.641415
C1orf212:NM_001164824:chr1:-:728:1255	Smim12:NM_030252:chr4:+:761:1003	dORF	0.726766	1.11741	0.650403
C20orf24:NM_001199534:chr20:+:910:960	1110008F13Rik:NM_026124:chr2:+:571:993	dORF	0.126687	0.328644	0.385485
C9orf3:NM_001193329:chr9:+:2491:2859	2010111I01Rik:NM_001289924:chr13:+:2831:3004	dORF	0.660643	0.821601	0.804092
CALM2:NM_001743:chr2:-:941:1117	Calm2:NM_007589:chr17:-:922:1098	dORF	0.0307456	0.0765676	0.401548
CARHSP1:NM_001042476:chr16:-:903:1028	Carhsp1:NM_025821:chr16:-:460:723	dORF	0.48751	0.54882	0.888287
CCDC88B:NM_032251:chr11:+:4645:4770	Ccdc88b:NM_001081291:chr19:-:4641:4718	dORF	0.136538	0.120731	1.13092
CCL20:NM_001130046:chr2:+:377:466	Ccl20:NM_001159738:chr1:+:369:416	dORF	0.254075	0.309862	0.819963
CCL20:NM_001130046:chr2:+:555:605	Ccl20:NM_001159738:chr1:+:546:587	dORF	0.144538	0.279433	0.517252
CDC42SE1:NM_001038707:chr1:-:818:898	Cdc42se1:NM_001038708:chr3:+:574:693	dORF	0.234053	0.471357	0.49655
CDC42SE2:NM_001038702:chr5:+:722:910	Cdc42se2:NM_178626:chr11:-:1056:1112	dORF	0.165312	0.771875	0.214169
CDPF1:NM_207327:chr22:-:268:690	Cdpf1:NM_001164625:chr15:-:306:710	dORF	0.519599	0.453752	1.14512
CENPO:NM_001199803:chr2:+:1143:1457	Cenpo:NM_134046:chr12:-:2697:2801	dORF	0.227671	0.304547	0.747573
CFL1:NM_005507:chr11:-:731:958	Cfl1:NM_007687:chr19:+:558:869	dORF	0.591585	0.710981	0.832068
CHST7:NM_019886:chrX:+:1473:1799	Chst7:NM_021715:chrX:+:1438:1608	dORF	0.396751	0.120167	3.30165
CHTF8:NM_001039690:chr16:-:2391:2483	Chtf8:NM_145412:chr8:-:2403:2546	dORF	0.424339	0.804763	0.527285
CHTF8:NM_001039690:chr16:-:504:2078	Chtf8:NM_145412:chr8:-:488:2089	dORF	0.0625128	0.317932	0.196623
CIB1:NM_006384:chr15:-:751:945	Cib1:NM_011870:chr7:-:631:819	dORF	0.576328	0.762316	0.756022
CKS1B:NM_001826:chr1:+:340:453	Cks1b:NM_016904:chr3:-:314:391	dORF	0.316063	0.369429	0.855546
CKS2:NM_001827:chr9:+:331:372	Cks2:NM_025415:chr13:+:359:457	dORF	0.309065	0.554995	0.55688
CNIH:NM_005776:chr14:-:589:642	Cnih1:NM_009919:chr14:-:577:618	dORF	0.24739	0.394163	0.627634
COX17:NM_005694:chr3:-:316:378	Cox17:NM_001017429:chr16:+:332:397	dORF	0.116669	0.186223	0.6265
COX5A:NM_004255:chr15:-:602:724	Cox5a:NM_007747:chr9:+:604:648	dORF	0.139747	0.515487	0.271097
CRCP:NM_001040647:chr7:+:503:640	Crcp:NM_007761:chr5:+:482:625	dORF	0.41207	0.688508	0.598497
CSRP1:NM_001193570:chr1:-:777:920	Csrp1:NM_007791:chr1:+:673:825	dORF	0.491412	0.359843	1.36563
CTDSP2:NM_005730:chr12:-:1724:1840	Ctdsp2:NM_001113470:chr10:+:1672:1806	dORF	0.570894	0.919002	0.62121
CYR61:NM_001554:chr1:+:1465:1638	Cyr61:NM_010516:chr3:-:1411:1518	dORF	0.581879	0.899022	0.647236
CYTH1:NM_004762:chr17:-:1331:1420	Cyth1:NM_001112699:chr11:-:1359:1511	dORF	0.432864	0.771628	0.560974
CYTH1:NM_004762:chr17:-:2358:2693	Cyth1:NM_001112699:chr11:-:2455:2685	dORF	0.424555	0.660361	0.642914
DAAM1:NM_001270520:chr14:+:3469:3681	Daam1:NM_001286452:chr12:+:3666:3806	dORF	0.619694	1.16408	0.532345
DEXI:NM_014015:chr16:-:752:1183	Dexi:NM_021428:chr16:-:521:949	dORF	0.692586	1.03605	0.66849
DNAJB12:NM_001002762:chr10:-:2575:2601	Dnajb12:NM_019965:chr10:+:1251:1277	dORF	0	0	NA
DPM2:NM_003863:chr9:-:1290:1400	Dpm2:NM_010073:chr2:+:538:765	dORF	0.561588	0.585699	0.958832
DPP3:NM_001256670:chr11:+:2589:2861	Dpp3:NM_133803:chr19:-:2449:2556	dORF	0.380099	0	NA
DYNLL1:NM_001037494:chr12:+:528:581	Dynll1:NM_019682:chr5:-:367:546	dORF	0.0529233	0.089441	0.591712
DYNLL2:NM_080677:chr17:+:1089:1211	Dynll2:NM_001168471:chr11:-:901:993	dORF	0.352652	0.495268	0.712043
DYNLL2:NM_080677:chr17:+:550:699	Dynll2:NM_001168471:chr11:-:285:515	dORF	0.300696	0.48158	0.624395
E2F4:NM_001950:chr16:+:1305:1397	E2f4:NM_148952:chr8:+:1311:1370	dORF	0.440013	0.345819	1.27238
EDA2R:NM_001199687:chrX:-:973:1098	Eda2r:NM_001161432:chrX:-:1127:1174	dORF	0.225579	0.436325	0.516996
EIF1:NM_005801:chr17:+:548:607	Eif1:NM_011508:chr11:+:518:577	dORF	0.0242533	0.069342	0.349763
EIF1:NM_005801:chr17:+:678:749	Eif1:NM_011508:chr11:+:648:824	dORF	0.338188	0.2367	1.42876
EIF1AX:NM_001412:chrX:-:644:703	Eif1ax:NM_025437:chrX:+:497:739	dORF	0.247991	0.244501	1.01428
EIF1B:NM_005875:chr3:+:673:801	Eif1b:NM_026892:chr9:+:576:767	dORF	0.101985	0.749716	0.136031
EIF4A2:NM_001967:chr3:+:1640:1669	Eif4a2:NM_001123037:chr16:+:1631:1813	dORF	0	0	NA
EIF4EBP1:NM_004095:chr8:+:442:729	Eif4ebp1:NM_007918:chr8:+:529:735	dORF	0.742033	0.960979	0.772164
EIF6:NM_001267810:chr20:-:760:882	Eif6:NM_010579:chr2:-:1226:1297	dORF	0.393999	0.635718	0.61977
ENY2:NM_001193557:chr8:+:402:440	Eny2:NM_175009:chr15:+:444:500	dORF	0.0377393	0	NA
F12:NM_000505:chr5:-:1457:2038	F12:NM_021489:chr13:-:1649:1831	dORF	0.246835	0.14035	1.75871
FES:NM_001143783:chr15:+:2140:2337	Fes:NM_010194:chr7:-:2478:2729	dORF	0.324802	0.229856	1.41307
FHL3:NM_001243878:chr1:-:856:1050	Fhl3:NM_010213:chr4:+:784:1350	dORF	0.582829	1.15348	0.505278
FKBP5:NM_001145775:chr6:-:1717:1779	Fkbp5:NM_010220:chr17:-:1582:1680	dORF	0.302422	0.207474	1.45763
FOXK2:NM_004514:chr17:+:2602:3030	Foxk2:NM_001080932:chr11:+:2615:2740	dORF	0.453774	1.21433	0.373682
FSTL3:NM_005860:chr19:+:909:1028	Fstl3:NM_031380:chr10:+:876:1010	dORF	0.670916	0.897336	0.747676
FXN:NM_000144:chr9:+:852:1163	Fxn:NM_008044:chr19:-:708:836	dORF	0.529985	1.20022	0.441573
GABARAP:NM_007278:chr17:-:423:581	Gabarap:NM_019749:chr11:+:563:757	dORF	0.290122	0.0795505	3.64702
GNG12:NM_018841:chr1:-:1211:1363	Gng12:NM_001177556:chr6:+:1230:1424	dORF	0.465996	0.368384	1.26497
GNG5:NM_005274:chr1:-:565:633	Gng5:NM_010318:chr3:+:295:372	dORF	0.287402	0.362153	0.793592
GNPNAT1:NM_198066:chr14:-:841:1056	Gnpnat1:NM_019425:chr14:-:638:790	dORF	0.835299	0.557102	1.49937
GPX1:NM_000581:chr3:-:684:797	Gpx1:NM_008160:chr9:+:896:1021	dORF	0.302308	1.32052	0.228932
GTF2A2:NM_004492:chr15:-:508:612	Gtf2a2:NM_001039519:chr9:+:487:597	dORF	0.241932	0.490325	0.493412
GTF2A2:NM_004492:chr15:-:694:777	Gtf2a2:NM_001039519:chr9:+:719:784	dORF	0.195713	0.428443	0.456801
H3F3B:NM_005324:chr17:-:749:871	H3f3b:NM_008211:chr11:-:807:878	dORF	0	0.0706321	0
HDGF:NM_001126050:chr1:-:862:1017	Hdgf:NM_008231:chr3:+:1027:1158	dORF	0.25258	0.458011	0.551472
HDGFRP3:NM_016073:chr15:-:1295:1417	Hdgfrp3:NM_013886:chr7:-:1173:1289	dORF	0.276864	0.527142	0.525217
HINT1:NM_005340:chr5:-:577:711	Hint1:NM_008248:chr11:+:468:527	dORF	0.330952	0.13021	2.54168
HMGA1:NM_002131:chr6:+:1324:1746	Hmga1-rs1:NM_001166476:chr17:+:1184:1444	dORF	0.448251	0.691457	0.648271
HMGN1:NM_004965:chr21:-:519:659	Hmgn1:NM_008251:chr16:-:350:532	dORF	0.165966	0.134336	1.23545
HMGN1:NM_004965:chr21:-:700:819	Hmgn1:NM_008251:chr16:-:655:699	dORF	0.143361	0.326004	0.439751
HNRNPH1:NM_001257293:chr5:-:1550:1615	Hnrnph1:NM_021510:chr11:+:1560:1592	dORF	0	0.24242	0
HOXB6:NM_018952:chr17:-:900:1268	Hoxb6:NM_008269:chr11:+:554:946	dORF	0.535646	0.850984	0.629443
ICMT:NM_012405:chr1:-:949:1038	Icmt:NM_133788:chr4:+:1019:1099	dORF	0.287789	0.257317	1.11842
ID3:NM_002167:chr1:-:740:880	Id3:NM_008321:chr4:+:427:675	dORF	0.524212	0.704553	0.744035
IL24:NM_001185156:chr1:+:1214:1291	Il24:NM_053095:chr1:-:1074:1109	dORF	0.288597	0.137612	2.09718
IL24:NM_001185156:chr1:+:899:1054	Il24:NM_053095:chr1:-:768:920	dORF	0.585478	0.683965	0.856007
IL24:NM_001185156:chr1:+:972:1067	Il24:NM_053095:chr1:-:742:885	dORF	0.47652	0.503794	0.945863
IRS1:NM_005544:chr2:-:3737:3814	Irs1:NM_010570:chr1:-:4598:4675	dORF	0.0902419	0	NA
KLF13:NM_015995:chr15:+:1339:1539	Klf13:NM_021366:chr7:-:1494:1670	dORF	0.161587	0.291186	0.554927
KRT10:NM_000421:chr17:-:1845:1880	Krt10:NM_010660:chr11:-:1782:1817	dORF	0.0766749	0	NA
KRT10:NM_000421:chr17:-:2003:2068	Krt10:NM_010660:chr11:-:1925:2065	dORF	0.29042	0.185092	1.56906
KRT10:NM_000421:chr17:-:2068:2130	Krt10:NM_010660:chr11:-:1950:2078	dORF	0.282999	0.392271	0.721437
LGALS1:NM_002305:chr22:+:518:556	Lgals1:NM_008495:chr15:+:384:530	dORF	0.138918	0.20395	0.681138
LPPR2:NM_001170635:chr19:+:1326:1424	BC018242:NM_144935:chr9:+:1263:1412	dORF	0.141443	0	NA
LRRC8A:NM_001127244:chr9:+:3372:3629	Lrrc8a:NM_177725:chr2:+:3079:3180	dORF	0.578794	0.494458	1.17056
LSM12:NM_152344:chr17:-:921:1094	Lsm12:NM_172947:chr11:-:546:743	dORF	0.102661	0.23205	0.44241
LTC4S:NM_145867:chr5:+:460:636	Ltc4s:NM_008521:chr11:-:445:573	dORF	0.560419	1.18852	0.471528
LUZP6:NM_001128619:chr7:-:712:957	Mtpn:NM_008098:chr6:-:808:963	dORF	0.304736	0.326741	0.932656
MARVELD1:NM_031484:chr10:+:2119:2256	Marveld1:NM_183195:chr19:+:2019:2105	dORF	0.70525	0.913422	0.772096
MINOS1:NM_001032363:chr1:+:302:451	Minos1:NM_001163006:chr4:-:355:450	dORF	0.776485	0.643272	1.20709
MINOS1:NM_001032363:chr1:+:312:425	Minos1:NM_001163006:chr4:-:355:450	dORF	0.365226	0.712307	0.512737
MYL12A:NM_006471:chr18:+:977:1114	Myl12a:NM_026064:chr17:-:1051:1155	dORF	0.41381	0.624649	0.662468
NAA60:NM_001083600:chr16:+:873:995	Naa60:NM_029090:chr16:+:871:993	dORF	0.30431	0.624102	0.487596
NDUFA8:NM_014222:chr9:-:671:739	Ndufa8:NM_026703:chr2:-:576:731	dORF	0.36439	1.14193	0.319101
NDUFB4:NM_001168331:chr3:+:1438:1476	Ndufb4:NM_026610:chr16:-:316:447	dORF	0.263834	0.416981	0.632723
NECAP2:NM_001145277:chr1:+:835:1071	Necap2:NM_025383:chr4:-:913:1251	dORF	0.618376	0.835454	0.740168
NEDD8:NM_006156:chr14:-:348:542	Nedd8:NM_008683:chr14:-:381:536	dORF	0.114455	0.174978	0.65411
NUCKS1:NM_022731:chr1:-:1016:1153	Nucks1:NM_001145804:chr1:+:1036:1470	dORF	0.268073	0.179848	1.49055
NUDCD2:NM_145266:chr5:-:582:683	Nudcd2:NM_026023:chr11:+:811:900	dORF	0.829862	1.94543	0.42657
NUDCD2:NM_145266:chr5:-:673:858	Nudcd2:NM_026023:chr11:+:1001:1093	dORF	0.260555	0.31328	0.8317
OAZ2:NM_002537:chr15:-:798:998	Oaz2:NM_010952:chr9:+:781:981	dORF	0.0761835	0.0219856	3.46515
OST4:NM_001134693:chr2:-:216:251	Ost4:NM_001134692:chr5:-:363:404	dORF	0	0	NA
OST4:NM_001134693:chr2:-:263:379	Ost4:NM_001134692:chr5:-:406:531	dORF	0.124103	0.122364	1.01422
OST4:NM_001134693:chr2:-:384:410	Ost4:NM_001134692:chr5:-:536:562	dORF	0	0.2575	0
PAFAH1B2:NM_002572:chr11:+:832:963	Pafah1b2:NM_008775:chr9:-:860:937	dORF	0.452997	0.781832	0.579405
PDCD6:NM_001267556:chr5:+:666:818	Pdcd6:NM_011051:chr13:-:621:860	dORF	0.547935	0.422106	1.2981
PDGFC:NM_016205:chr4:-:2762:2878	Pdgfc:NM_019971:chr3:+:3326:3409	dORF	0.151049	0.309369	0.488248
PFDN1:NM_002622:chr5:-:542:688	Pfdn1:NM_026027:chr18:-:510:644	dORF	0.506084	1.21219	0.417496
PFN1:NM_005022:chr17:-:1243:1344	Pfn1:NM_011072:chr11:-:713:850	dORF	0.424439	0.820664	0.51719
PGS1:NM_024419:chr17:+:1640:1828	Pgs1:NM_133757:chr11:+:1642:1821	dORF	0.757013	0.741754	1.02057
PHF5A:NM_032758:chr22:-:391:501	Phf5a:NM_026737:chr15:-:364:471	dORF	0.326474	0.719724	0.45361
PKIA:NM_006823:chr8:+:714:767	Pkia:NM_008862:chr3:+:336:419	dORF	0.109672	0.192202	0.570606
PKIA:NM_006823:chr8:+:829:960	Pkia:NM_008862:chr3:+:439:612	dORF	0.317779	0.201245	1.57906
PKM:NM_001206796:chr15:-:2216:2539	Pkm:NM_001253883:chr9:+:1890:2024	dORF	0.257402	0.556916	0.462192
POLE4:NM_019896:chr2:+:597:686	Pole4:NM_025882:chr6:-:588:650	dORF	0.388046	0.511457	0.758707
PPP2R4:NM_001193397:chr9:+:1148:1207	Ppp2r4:NM_138748:chr2:+:1316:1357	dORF	0.238812	0.878062	0.271976
PPP2R4:NM_001193397:chr9:+:1507:1758	Ppp2r4:NM_138748:chr2:+:1757:1831	dORF	0.373289	0.449756	0.82998
PRC1:NM_001267580:chr15:-:2362:2406	Prc1:NM_001285997:chr7:+:2580:2654	dORF	0.0952	0.557135	0.170874
PTMA:NM_001099285:chr2:+:692:853	Ptma:NM_008972:chr1:+:692:826	dORF	0.139559	0.148227	0.941524
PUF60:NM_001136033:chr8:-:1778:1837	Puf60:NM_001164600:chr15:-:1683:1742	dORF	0.164621	0.787683	0.208994
RAC1:NM_006908:chr7:+:852:1145	Rac1:NM_009007:chr5:-:759:899	dORF	0.0872442	0.230589	0.378354
RAD23B:NM_001244713:chr9:+:1342:1494	Rad23b:NM_009011:chr4:+:1567:1716	dORF	0.308115	0.246538	1.24977
RBM3:NM_006743:chrX:+:709:825	Rbm3:NM_001166410:chrX:-:382:756	dORF	0.210912	0.422767	0.498885
RBM8A:NM_005105:chr1:+:681:761	Rbm8a:NM_001102407:chr3:+:605:694	dORF	0.227014	0.25316	0.896723
RER1:NM_007033:chr1:+:966:1211	Rer1:NM_026395:chr4:-:839:919	dORF	0.2638	0.534746	0.493319
RGMB:NM_001012761:chr5:+:1946:2023	Rgmb:NM_178615:chr17:-:1878:1943	dORF	0.346632	0.281534	1.23122
RGS14:NM_006480:chr5:+:1879:1971	Rgs14:NM_016758:chr13:+:1870:1956	dORF	0.472074	0.83413	0.565948
RGS14:NM_006480:chr5:+:1937:2371	Rgs14:NM_016758:chr13:+:1895:2032	dORF	0.32839	0.407087	0.806682
RGS2:NM_002923:chr1:+:690:749	Rgs2:NM_009061:chr1:-:663:755	dORF	0.314443	0.23874	1.31709
RHOA:NM_001664:chr3:-:882:1019	Rhoa:NM_016802:chr9:+:1039:1143	dORF	0.399726	0.774106	0.516371
RNF24:NM_001134337:chr20:-:579:776	Rnf24:NM_178607:chr2:-:429:731	dORF	0.324031	0.851034	0.380749
RNF4:NM_001185009:chr4:+:1439:1849	Rnf4:NM_011278:chr5:+:882:1001	dORF	0.354376	0.46889	0.755778
RNF4:NM_001185009:chr4:+:1615:1965	Rnf4:NM_011278:chr5:+:1189:1386	dORF	0.577577	1.15025	0.502134
RPP14:NM_001098783:chr3:+:920:1426	Rpp14:NM_025938:chr14:+:698:1174	dORF	0.115601	0.528857	0.218587
RTEL1:NM_016434:chr20:+:4296:4559	Rtel1:NM_001001882:chr2:+:4189:4260	dORF	0.24906	1.47224	0.16917
S100A10:NM_002966:chr1:-:808:885	S100a10:NM_009112:chr3:+:414:551	dORF	0.514596	0.423704	1.21452
S100A14:NM_020672:chr1:-:589:750	S100a14:NM_001163525:chr3:+:735:779	dORF	0.179766	0.350281	0.513204
S100A14:NM_020672:chr1:-:735:803	S100a14:NM_001163525:chr3:+:763:876	dORF	0.277751	1.1012	0.252225
S100A16:NM_080388:chr1:-:667:798	S100a16:NM_026416:chr3:+:808:858	dORF	0.130926	0.238122	0.549828
SAR1A:NM_001142648:chr10:-:863:1114	Sar1a:NM_009120:chr10:+:766:1020	dORF	0.319389	0.720028	0.443579
SCG5:NM_001144757:chr15:+:733:822	Scg5:NM_009162:chr2:-:680:802	dORF	0.373608	0.335904	1.11225
SDF2:NM_006923:chr17:-:951:1067	Sdf2:NM_009143:chr11:+:896:1093	dORF	0.571588	0.762972	0.74916
SERF2:NM_001018108:chr15:+:719:913	Serf2:NM_011354:chr2:+:289:585	dORF	0.0376247	0.0367626	1.02345
SFN:NM_006142:chr1:+:841:1014	Sfn:NM_018754:chr4:-:1173:1241	dORF	0.460343	0.620422	0.741983
SFRP1:NM_003012:chr8:-:1330:1422	Sfrp1:NM_013834:chr8:+:1281:1394	dORF	0.451485	1.02116	0.44213
SFT2D2:NM_199344:chr1:+:549:737	Sft2d2:NM_145512:chr1:-:623:745	dORF	0.539355	0.87747	0.61467
SHISA5:NM_016479:chr3:-:1007:1225	Shisa5:NM_001284332:chr9:+:984:1067	dORF	0.382239	0.658114	0.580809
SHISA5:NM_016479:chr3:-:853:1092	Shisa5:NM_001284332:chr9:+:920:1021	dORF	0.513983	0.323874	1.58698
SIVA1:NM_006427:chr14:+:640:744	Siva1:NM_001161737:chr12:+:468:551	dORF	0.509505	1.3867	0.367422
SLC16A3:NM_001042422:chr17:+:1544:2065	Slc16a3:NM_001038653:chr11:+:1725:1931	dORF	0.475795	0.771738	0.616524
SLC16A3:NM_001042422:chr17:+:1548:1748	Slc16a3:NM_001038653:chr11:+:1609:1809	dORF	0.449684	0.557571	0.806507
SMIM3:NM_032947:chr5:+:1335:1448	Smim3:NM_134133:chr18:-:890:1021	dORF	0.552526	0.524263	1.05391
SNRPD1:NM_006938:chr18:+:490:618	Snrpd1:NM_009226:chr18:+:439:738	dORF	0.881519	0	NA
SON:NM_138927:chr21:+:7416:7481	Son:NM_178880:chr16:+:7505:7570	dORF	0	0	NA
SRP9:NM_001130440:chr1:+:675:722	Srp9:NM_012058:chr1:+:574:621	dORF	0.569205	0.580922	0.979831
SRRM2:NM_016333:chr16:+:8978:9247	Srrm2:NM_175229:chr17:+:8146:8325	dORF	0.221766	0.489266	0.453262
SRXN1:NM_080725:chr20:-:687:737	Srxn1:NM_029688:chr2:+:840:953	dORF	0.431261	0.700112	0.615988
SSBP1:NM_001256510:chr7:+:887:940	Ssbp1:NM_001286663:chr6:+:1112:1147	dORF	0.131724	0.296485	0.444288
STRA13:NM_001271006:chr17:-:687:776	Stra13:NM_016665:chr11:-:577:615	dORF	0.0873092	0.255813	0.3413
SUMO2:NM_001005849:chr17:-:640:810	Sumo2:NM_133354:chr11:-:642:845	dORF	0.37259	0.453944	0.820784
SWI5:NM_001040011:chr9:+:759:980	Swi5:NM_175190:chr2:-:648:761	dORF	0.760389	1.18698	0.64061
SZRD1:NM_001114600:chr1:+:1223:1420	Szrd1:NM_001025608:chr4:-:1102:1215	dORF	0.143079	0.256939	0.556858
SZRD1:NM_001114600:chr1:+:645:722	Szrd1:NM_001025608:chr4:-:568:603	dORF	0.132457	0.131472	1.00749
SZRD1:NM_001114600:chr1:+:692:802	Szrd1:NM_001025608:chr4:-:513:683	dORF	0.0498781	0.040924	1.2188
SZRD1:NM_001114600:chr1:+:792:956	Szrd1:NM_001025608:chr4:-:680:805	dORF	0.13894	0.412128	0.337127
TAX1BP3:NM_001204698:chr17:-:463:1032	Tax1bp3:NM_029564:chr11:+:877:1137	dORF	0.927609	2.55286	0.363361
TGFBI:NM_000358:chr5:+:2318:2422	Tgfbi:NM_009369:chr13:+:2150:2314	dORF	0.670069	0.649591	1.03152
THY1:NM_006288:chr11:-:946:1035	Thy1:NM_009382:chr9:+:607:747	dORF	0.723754	0.937145	0.772296
TIMM8A:NM_004085:chrX:-:659:760	Timm8a1:NM_013898:chrX:-:385:501	dORF	0.382025	0.721839	0.529238
TIMM9:NM_012460:chr14:-:753:905	Timm9:NM_001024853:chr12:-:670:900	dORF	0.811371	3.36654	0.241011
TMED9:NM_017510:chr5:+:711:854	Tmed9:NM_026211:chr13:+:688:849	dORF	0.779434	1.49801	0.520312
TMEM167B:NM_020141:chr1:+:313:396	Tmem167b:NM_026198:chr3:-:407:526	dORF	0.572364	0.525892	1.08837
TMEM241:NM_032933:chr18:-:936:1160	Tmem241:NM_001289666:chr18:-:912:1133	dORF	0.637054	1.09728	0.580576
TMEM9B:NM_020644:chr11:-:980:1183	Tmem9b:NM_020050:chr7:-:786:1091	dORF	0.424238	0.397271	1.06788
TMSB10:NM_021103:chr2:+:278:331	Tmsb10:NM_001039392:chr6:-:418:471	dORF	0.0252688	0	NA
TMSB10:NM_021103:chr2:+:303:452	Tmsb10:NM_001039392:chr6:-:443:592	dORF	0.594796	0.649833	0.915306
TMSB4X:NM_021109:chrX:+:212:280	Tmsb4x:NM_021278:chrX:-:262:330	dORF	0	0.149439	0
TMSB4X:NM_021109:chrX:+:324:488	Tmsb4x:NM_021278:chrX:-:453:644	dORF	0.469689	0.654042	0.718133
TNFRSF12A:NM_016639:chr16:+:478:603	Tnfrsf12a:NM_001161746:chr17:-:326:613	dORF	0.494638	0.847038	0.583962
TOMM5:NM_001001790:chr9:-:366:428	Tomm5:NM_001099675:chr4:-:351:395	dORF	0.215699	0.383523	0.562414
TOMM6:NM_001134493:chr6:+:493:612	Tomm6:NM_001164729:chr17:-:646:867	dORF	0.556716	0.796469	0.69898
TPT1:NM_003295:chr13:-:617:718	Tpt1:NM_009429:chr14:+:696:785	dORF	0.0966784	0.0495573	1.95084
TRMT112:NM_016404:chr11:-:512:574	Trmt112:NM_001166370:chr19:+:937:1017	dORF	0.450012	0.576647	0.780394
TSC22D1:NM_001243797:chr13:-:613:771	Tsc22d1:NM_001177751:chr14:+:746:829	dORF	0.372204	0.873157	0.426273
TSPAN14:NM_001128309:chr10:+:656:967	Tspan14:NM_145928:chr14:-:987:1052	dORF	0.201417	0.191481	1.05189
TSSC1:NM_003310:chr2:-:1366:1596	Tssc1:NM_201357:chr12:+:1302:1418	dORF	0.653396	1.4962	0.436705
TUSC2:NM_007275:chr3:-:688:927	Tusc2:NM_019742:chr9:+:871:1041	dORF	0.172134	0.572146	0.300856
TXN:NM_001244938:chr9:-:465:542	Txn1:NM_011660:chr4:-:352:684	dORF	0.307388	0.799847	0.384309
UBE2G1:NM_003342:chr17:-:925:1014	Ube2g1:NM_025985:chr11:+:896:1003	dORF	0.333095	0.150511	2.2131
UCK2:NM_012474:chr1:+:1210:1296	Uck2:NM_030724:chr1:-:884:1177	dORF	0.0724271	0.193646	0.374017
VDR:NM_000376:chr12:-:1456:1644	Vdr:NM_009504:chr15:-:1395:1583	dORF	0.460479	0.670565	0.686703
VKORC1L1:NM_173517:chr7:+:629:745	Vkorc1l1:NM_001001327:chr5:+:538:606	dORF	0.320816	0.207641	1.54505
WIBG:NM_001143853:chr12:-:647:862	Wibg:NM_001170869:chr10:+:705:956	dORF	0.628639	1.31382	0.47848
YTHDF2:NM_001172828:chr1:+:1954:2097	Ythdf2:NM_145393:chr4:-:2201:2347	dORF	0.149664	0.231629	0.646138
ZBTB44:NM_014155:chr11:-:1845:2027	Zbtb44:NM_001115130:chr9:+:1822:2004	dORF	0.0815093	0.320854	0.254039
ZHX1:NM_001017926:chr8:-:3330:3494	Zhx1:NM_001042438:chr15:-:3526:3660	dORF	0.130731	0.348343	0.375293
ZNF32:NM_001005368:chr10:-:892:1041	Zfp637:NM_177684:chr6:+:797:949	dORF	0.262373	0.281347	0.93256

## Sheet: internal
Human ORF ID	Mouse ORF ID	Mouse ORF type	Ka	Ks	Ka/Ks
ABCC9:NM_005691:chr12:-:2659:2733	Abcc9:NM_001044720:chr6:-:2808:2891	internal	0.192226	0	NA
ADAMTSL1:NM_001040272:chr9:+:4098:4238	Adamtsl1:NM_029967:chr4:+:4092:4223	internal	0.228689	0.0785193	2.91252
ADCY7:NM_001114:chr16:+:3464:3505	Adcy7:NM_001037723:chr8:+:3842:3883	internal	0.110989	0	NA
ADIPOR1:NM_015999:chr1:-:370:408	Adipor1:NM_028320:chr1:+:250:414	internal	0.155261	0	NA
ADIPOR2:NM_024551:chr12:+:300:335	Adipor2:NM_197985:chr6:-:234:290	internal	0.12288	0.171255	0.717522
ALS2:NM_001135745:chr2:-:1009:1086	Als2:NM_001159948:chr1:-:771:1157	internal	0.260196	0.0280745	9.26807
ANKRD13D:NM_207354:chr11:+:357:545	Ankrd13d:NM_026720:chr19:-:354:542	internal	0.106957	0.0452445	2.36398
ANKRD27:NM_032139:chr19:-:361:402	Ankrd27:NM_145633:chr7:+:357:398	internal	0.183502	0.291387	0.629754
ANKRD27:NM_032139:chr19:-:650:811	Ankrd27:NM_145633:chr7:+:703:828	internal	0.179731	0	NA
AOX1:NM_001159:chr2:+:1278:1343	Aox1:NM_009676:chr1:+:1222:1287	internal	0.205401	0.278125	0.738521
APTX:NM_001195248:chr9:-:195:233	Aptx:NM_001025444:chr4:-:178:216	internal	0.0367959	0	NA
APTX:NM_001195248:chr9:-:497:532	Aptx:NM_001025444:chr4:-:462:557	internal	0.148386	0.350413	0.423459
ARHGEF19:NM_153213:chr1:-:1470:1727	Arhgef19:NM_172520:chr4:+:1638:1760	internal	0.107216	0.0341965	3.1353
ARHGEF7:NM_001113511:chr13:+:572:625	Arhgef7:NM_001113517:chr8:+:406:462	internal	0.117824	0.0616885	1.90999
ARHGEF7:NM_001113512:chr13:+:359:475	Arhgef7:NM_001113517:chr8:+:406:462	internal	0.117824	0.0616885	1.90999
ASAH2:NM_001143974:chr10:-:1642:1761	Asah2:NM_018830:chr19:-:2088:2234	internal	0.148743	0.0748949	1.98602
ATP8B1:NM_005603:chr18:-:2303:2338	Atp8b1:NM_001001488:chr18:-:2506:2562	internal	0.129906	0	NA
BACH1:NM_001186:chr21:+:230:307	Bach1:NM_007520:chr16:+:272:355	internal	0.186527	0.0504363	3.69827
BACH1:NM_001186:chr21:+:531:581	Bach1:NM_007520:chr16:+:579:629	internal	0.178282	0	NA
BAD:NM_004322:chr11:-:517:687	Bad:NM_001285453:chr19:+:237:407	internal	0.201156	0.0332321	6.05306
BAP1:NM_004656:chr3:-:228:317	Bap1:NM_027088:chr14:+:242:331	internal	0.133971	0	NA
BATF3:NM_018664:chr1:-:323:475	Batf3:NM_030060:chr1:+:91:276	internal	0.181779	0.106032	1.71438
BBX:NM_001142568:chr3:+:523:579	Bbx:NM_027444:chr16:-:499:555	internal	0.0957217	0	NA
BCL11A:NM_018014:chr2:-:310:387	Bcl11a:NM_001159289:chr11:+:417:494	internal	0.0718376	0	NA
BCL3:NM_005178:chr19:+:258:440	Bcl3:NM_033601:chr7:-:86:433	internal	0.292703	0.148108	1.97628
BCL6:NM_001130845:chr3:-:470:550	Bcl6:NM_009744:chr16:-:137:181	internal	0.066998	0	NA
BIVM-ERCC5:NM_001204425:chr13:+:153:221	Bivm:NM_144558:chr1:+:476:568	internal	0.130154	0.0871477	1.49349
BIVM-ERCC5:NM_001204425:chr13:+:283:372	Bivm:NM_144558:chr1:+:600:692	internal	0.221169	0.186033	1.18887
BIVM-ERCC5:NM_001204425:chr13:+:321:575	Bivm:NM_144558:chr1:+:794:883	internal	0.0953991	0.108421	0.879894
BTBD10:NM_032320:chr11:-:282:404	Btbd10:NM_133700:chr7:-:372:497	internal	0.0453941	0.110538	0.410666
C11orf82:NM_145018:chr11:+:1007:1210	4632434I11Rik:NM_001080995:chr7:-:1024:1203	internal	0.269021	0.384777	0.699162
C16orf52:NM_001164579:chr16:+:466:540	BC030336:NM_001164580:chr7:+:171:518	internal	0	0	NA
C1orf174:NM_207356:chr1:-:229:291	A430005L14Rik:NM_175287:chr4:+:193:255	internal	0.228433	0.0437777	5.21802
C21orf7:NM_020152:chr21:+:647:694	Map3k7cl:NM_144854:chr16:+:363:422	internal	0.135475	0.196087	0.69089
C9orf3:NM_001193329:chr9:+:2183:2245	2010111I01Rik:NM_001289924:chr13:+:2328:2390	internal	0.330684	0.217225	1.52231
C9orf3:NM_001193329:chr9:+:2359:2484	2010111I01Rik:NM_001289924:chr13:+:2504:2629	internal	0.19497	0.142926	1.36413
CALML4:NM_033429:chr15:-:976:1233	Calml4:NM_138304:chr9:+:99:368	internal	0.163241	0.04284	3.81048
CAPRIN2:NM_001002259:chr12:-:1250:1312	Caprin2:NM_181541:chr6:-:408:470	internal	0.132528	0.100734	1.31562
CASK:NM_001126054:chrX:-:2408:2455	Cask:NM_001284503:chrX:-:2912:2983	internal	0.123769	0	NA
CBLL1:NM_024814:chr7:+:370:414	Cbll1:NM_001253847:chr12:-:97:165	internal	0.0642563	0	NA
CCDC122:NM_144974:chr13:-:416:445	Ccdc122:NM_175369:chr14:+:408:437	internal	0.0887121	0	NA
CCDC34:NM_030771:chr11:-:328:384	Ccdc34:NM_026613:chr2:+:313:378	internal	0.285307	0.488134	0.584486
CCDC71:NM_022903:chr3:-:157:249	Ccdc71:NM_133744:chr9:+:171:263	internal	0.163048	0	NA
CCDC90B:NM_021825:chr11:-:579:623	Ccdc90b:NM_001162918:chr7:+:577:648	internal	0.124452	0.155546	0.800094
CCNB1IP1:NM_021178:chr14:-:604:666	Ccnb1ip1:NM_001111119:chr14:-:177:290	internal	0.126574	0	NA
CCP110:NM_001199022:chr16:+:2909:2959	Ccp110:NM_182995:chr7:+:2903:2983	internal	0.109321	0.125097	0.873885
CDK15:NM_139158:chr2:+:1146:1223	Cdk15:NM_001033373:chr1:+:1210:1287	internal	0.0696515	0.33334	0.208951
CHN2:NM_004067:chr7:+:486:746	Chn2:NM_001163640:chr6:+:224:394	internal	0.0543264	0.0296251	1.8338
CHRNA9:NM_017581:chr4:+:218:307	Chrna9:NM_001081104:chr5:+:403:471	internal	0.279844	0.0411676	6.79768
CIDEB:NM_014430:chr14:-:1426:1545	Cideb:NM_009894:chr14:-:452:622	internal	0.17629	0.164159	1.0739
CLDND2:NM_152353:chr19:-:778:882	Cldnd2:NM_028849:chr7:+:434:538	internal	0.271213	0.115016	2.35805
CLK4:NM_020666:chr5:-:467:532	Clk4:NM_007714:chr11:+:458:523	internal	0.042215	0.0735291	0.574126
CLOCK:NM_001267843:chr4:-:1206:1265	Clock:NM_001289826:chr5:-:394:684	internal	0.069071	0	NA
COX11:NM_001162861:chr17:-:80:166	Cox11:NM_199008:chr11:+:29:115	internal	0.464839	0.456231	1.01887
CRNKL1:NM_016652:chr20:-:2164:2187	Crnkl1:NM_025820:chr2:-:1745:1768	internal	0.0604687	0	NA
CSNK1G1:NM_022048:chr15:-:634:660	Csnk1g1:NM_173185:chr9:+:574:600	internal	0	0	NA
CTC1:NM_025099:chr17:-:2173:2292	Ctc1:NM_001013256:chr11:+:2366:2440	internal	0.130306	0.0472474	2.75796
CTDSP1:NM_001206878:chr2:+:220:399	Ctdsp1:NM_153088:chr1:+:434:616	internal	0.0964576	0	NA
CTDSP1:NM_021198:chr2:+:481:663	Ctdsp1:NM_153088:chr1:+:434:616	internal	0.0944218	0	NA
CTDSP2:NM_005730:chr12:-:674:811	Ctdsp2:NM_001113470:chr10:+:666:800	internal	0.184882	0.0606014	3.05079
CTSK:NM_000396:chr1:-:756:815	Ctsk:NM_007802:chr3:+:655:714	internal	0.214019	0	NA
CUL4B:NM_001079872:chrX:-:397:447	Cul4b:NM_001110142:chrX:-:429:479	internal	0	0	NA
CYP27B1:NM_000785:chr12:-:550:1146	Cyp27b1:NM_010009:chr10:+:433:525	internal	0.252933	0.04146	6.10066
DAAM1:NM_001270520:chr14:+:3021:3092	Daam1:NM_001286452:chr12:+:3211:3282	internal	0.28139	0	NA
DCAF17:NM_001164821:chr2:+:472:504	Dcaf17:NM_001165980:chr2:+:311:427	internal	0.0931099	0	NA
DCAF17:NM_001164821:chr2:+:596:679	Dcaf17:NM_001165980:chr2:+:555:587	internal	0.114094	0.0827836	1.37822
DCP1B:NM_152640:chr12:-:1257:1331	Dcp1b:NM_001033379:chr6:+:1118:1363	internal	0.392935	0.645151	0.609059
DDX60:NM_017631:chr4:-:2967:3059	Ddx60:NM_001081215:chr8:+:3021:3053	internal	0.135678	0	NA
DET1:NM_001144074:chr15:-:354:494	Det1:NM_029585:chr7:-:125:535	internal	0.115591	0.0863588	1.3385
DGCR2:NM_001184781:chr22:-:423:455	Dgcr2:NM_001109750:chr16:-:418:471	internal	0.141947	0.163628	0.867501
DGUOK:NM_080916:chr2:+:276:467	Dguok:NM_001162521:chr6:-:394:501	internal	0.233037	0.0649324	3.58891
DHX29:NM_019030:chr5:-:2468:2509	Dhx29:NM_172594:chr13:+:2345:2386	internal	0.149971	0	NA
DHX40:NM_001166301:chr17:+:269:343	Dhx40:NM_026191:chr11:-:233:355	internal	0.15537	0	NA
DHX40:NM_024612:chr17:+:269:391	Dhx40:NM_026191:chr11:-:233:355	internal	0.111481	0	NA
DIS3L:NM_001143688:chr15:+:340:504	Dis3l:NM_001001295:chr9:-:451:615	internal	0.194504	0.109	1.78444
DMKN:NM_001126056:chr19:-:1192:1278	Dmkn:NM_001166173:chr7:+:1312:1395	internal	0.30877	0.420798	0.733772
DMKN:NM_001126056:chr19:-:859:1071	Dmkn:NM_001166173:chr7:+:1099:1305	internal	0.69603	0.510896	1.36237
DMKN:NM_001126057:chr19:-:859:1254	Dmkn:NM_001166173:chr7:+:1114:1305	internal	0.598087	0.267688	2.23427
DMKN:NM_001126058:chr19:-:859:1311	Dmkn:NM_001166173:chr7:+:1312:1395	internal	0.229723	0.429389	0.535
DMKN:NM_001126059:chr19:-:171:329	Dmkn:NM_001166173:chr7:+:1060:1305	internal	0.760521	1.05625	0.720018
DMKN:NM_001190347:chr19:-:859:1098	Dmkn:NM_001166174:chr7:+:808:1212	internal	0.516286	0.565605	0.912803
DMKN:NM_001190349:chr19:-:859:1260	Dmkn:NM_001166173:chr7:+:1312:1395	internal	0.229723	0.429389	0.535
DMTF1:NM_001142326:chr7:+:387:470	Dmtf1:NM_001110327:chr5:-:470:553	internal	0.162162	0.0322173	5.03339
DNAAF3:NM_001256714:chr19:-:1425:1496	Dnaaf3:NM_001033548:chr7:-:1066:1281	internal	0.125161	0.0614454	2.03694
DNAJB5:NM_001135004:chr9:+:422:457	Dnajb5:NM_019874:chr4:+:127:168	internal	0.0837621	0	NA
DOPEY2:NM_005128:chr21:+:800:937	Dopey2:NM_027293:chr16:+:902:1045	internal	0.230809	0.156735	1.4726
DSEL:NM_032160:chr18:-:3301:3408	Dsel:NM_001081316:chr1:-:3522:3800	internal	0.120567	0.186787	0.645478
DST:NM_015548:chr6:-:13253:13354	Dst:NM_001276764:chr1:+:20755:20856	internal	0.0960291	0	NA
DSTYK:NM_015375:chr1:-:302:337	Dstyk:NM_172516:chr1:+:376:426	internal	0.136838	0.439812	0.311128
DUOX1:NM_017434:chr15:+:4691:4783	Duox1:NM_001099297:chr2:+:4355:4468	internal	0.0805247	0	NA
DUS4L:NM_001270419:chr7:+:242:340	Dus4l:NM_028002:chr12:-:201:299	internal	0.0697127	0	NA
DUSP16:NM_030640:chr12:-:1043:1189	Dusp16:NM_001048054:chr6:-:975:1139	internal	0.0899645	0	NA
DYNC1H1:NM_001376:chr14:+:12186:12245	Dync1h1:NM_030238:chr12:+:12226:12309	internal	0.164397	0.0395764	4.15392
DYRK1A:NM_001396:chr21:+:101:199	Dyrk1a:NM_001113389:chr16:+:172:270	internal	0.0861602	0	NA
DYRK4:NM_003845:chr12:+:1172:1201	Dyrk4:NM_207210:chr6:-:1310:1438	internal	0.0499921	0.177625	0.281447
E4F1:NM_004424:chr16:+:451:594	E4f1:NM_007893:chr17:-:492:584	internal	0.406364	0.144404	2.81408
ECM2:NM_001197295:chr9:-:1622:1708	Ecm2:NM_001012324:chr13:+:1639:1671	internal	0	0	NA
ECM2:NM_001197295:chr9:-:1841:1951	Ecm2:NM_001012324:chr13:+:1858:1938	internal	0.0830932	0.0727046	1.14289
EEA1:NM_003566:chr12:-:365:406	Eea1:NM_001001932:chr10:+:377:427	internal	0.0344713	0	NA
EEF1D:NM_001130053:chr8:-:400:489	Eef1d:NM_029663:chr15:-:173:295	internal	0.32061	0.271804	1.17956
EIF1:NM_005801:chr17:+:234:263	Eif1:NM_011508:chr11:+:177:233	internal	0	0	NA
EIF4G2:NM_001042559:chr11:-:563:586	Eif4g2:NM_001040131:chr7:-:478:501	internal	0	0	NA
EIF4G2:NM_001042559:chr11:-:964:1188	Eif4g2:NM_001040131:chr7:-:849:1103	internal	0.029156	0	NA
EP300:NM_001429:chr22:+:2794:2904	Ep300:NM_177821:chr15:+:2817:2924	internal	0.131791	0.103421	1.27432
EPOR:NM_000121:chr19:-:1069:1317	Epor:NM_010149:chr9:-:1190:1327	internal	0.127948	0.279683	0.457473
EPS15:NM_001981:chr1:-:345:365	Eps15:NM_007943:chr4:+:390:410	internal	0	2.47188	0
EVI5:NM_005665:chr1:-:105:272	Evi5:NM_007964:chr5:-:163:330	internal	0.0838906	0.0260853	3.21601
F12:NM_000505:chr5:-:843:977	F12:NM_021489:chr13:-:858:953	internal	0.34586	0.359075	0.963197
FAM104A:NM_001098832:chr17:-:158:289	Fam104a:NM_138598:chr11:-:94:270	internal	0.276863	0.246563	1.12289
FAM149B1:NM_173348:chr10:+:417:581	Fam149b:NM_001024512:chr14:+:286:552	internal	0.208321	0.159402	1.30689
FAM198B:NM_001031700:chr4:-:591:782	Fam198b:NM_133187:chr3:+:481:672	internal	0.188449	0.202118	0.932372
FAM212A:NM_203370:chr3:+:260:361	Fam212a:NM_026597:chr9:-:290:355	internal	0.299335	0.0729769	4.10178
FAM222B:NM_001077498:chr17:-:262:330	Fam222b:NM_145430:chr11:+:239:307	internal	0.0403888	0	NA
FAM84A:NM_145175:chr2:+:566:790	Fam84a:NM_029007:chr12:-:531:791	internal	0.126965	0.0300536	4.2246
FAT4:NM_024582:chr4:+:35:256	Fat4:NM_183221:chr3:+:82:246	internal	0.356536	0.125861	2.83278
FBXL16:NM_153350:chr16:-:645:875	Fbxl16:NM_001164225:chr17:+:657:812	internal	0.152471	0.0438175	3.47969
FBXO31:NM_024735:chr16:-:433:471	Fbxo31:NM_133765:chr8:-:398:544	internal	0.128677	0	NA
FBXW2:NM_012164:chr9:-:447:491	Fbxw2:NM_001164768:chr2:-:343:387	internal	0.0327049	0	NA
FBXW2:NM_012164:chr9:-:734:763	Fbxw2:NM_001164768:chr2:-:588:659	internal	0	0	NA
FDX1L:NM_001031734:chr19:-:284:373	Fdx1l:NM_001039824:chr9:-:246:335	internal	0.0764704	0.0569794	1.34207
FKTN:NM_001079802:chr9:+:322:408	Fktn:NM_139309:chr4:+:218:304	internal	0.129777	0.129055	1.0056
FMN2:NM_020066:chr1:+:1390:1578	Fmn2:NM_019445:chr1:+:1074:1505	internal	0.25146	0.123034	2.04382
FOXM1:NM_001243088:chr12:-:389:508	Foxm1:NM_008021:chr6:+:235:444	internal	0.203118	0.168045	1.20871
FPGT-TNNI3K:NM_001112808:chr1:+:320:400	Fpgt:NM_029330:chr3:-:215:319	internal	0.188423	0.188768	0.998172
FRMD4B:NM_015123:chr3:-:1174:1206	Frmd4b:NM_145148:chr6:-:1312:1344	internal	0.195182	0	NA
FUZ:NM_025129:chr19:-:430:483	Fuz:NM_027376:chr7:+:399:452	internal	0.112757	0	NA
FYCO1:NM_024513:chr3:-:4185:4238	Fyco1:NM_001110253:chr9:-:4061:4114	internal	0.114018	0.271164	0.420477
G6PC3:NM_138387:chr17:+:910:942	G6pc3:NM_175935:chr11:+:868:933	internal	0.0946135	0.571605	0.165522
GALNT11:NM_022087:chr7:+:237:329	Galnt11:NM_144908:chr5:+:208:276	internal	0.0621344	0.139711	0.444733
GLTSCR1:NM_015711:chr19:+:288:377	Gltscr1:NM_001081418:chr7:-:165:290	internal	0.11496	0.0484269	2.37389
GPBP1L1:NM_021639:chr1:-:1581:1679	Gpbp1l1:NM_029868:chr4:+:1324:1479	internal	0.0656482	0	NA
GPR161:NM_001267609:chr1:-:953:1192	Gpr161:NM_001081126:chr1:+:478:717	internal	0.150781	0	NA
GPR161:NM_001267612:chr1:-:636:698	Gpr161:NM_001081126:chr1:+:478:717	internal	0.188918	0	NA
GPR161:NM_001267613:chr1:-:325:591	Gpr161:NM_001081126:chr1:+:478:717	internal	0.497065	0.330711	1.50302
GPSM1:NM_001145638:chr9:+:1172:1267	Gpsm1:NM_001199146:chr2:+:1126:1158	internal	0.144968	0.344451	0.420867
GTF3A:NM_002097:chr13:+:331:366	Gtf3a:NM_025652:chr5:+:255:341	internal	0.0842361	0.529518	0.159081
GTF3A:NM_002097:chr13:+:414:455	Gtf3a:NM_025652:chr5:+:338:379	internal	0.113813	0	NA
GTPBP3:NM_001128855:chr19:+:726:851	Gtpbp3:NM_032544:chr8:+:1286:1483	internal	0.350374	0.122506	2.86005
GZF1:NM_022482:chr20:+:371:472	Gzf1:NM_028986:chr2:+:484:546	internal	0.322943	0	NA
HDAC11:NM_001136041:chr3:+:129:236	Hdac11:NM_144919:chr6:+:59:166	internal	0.13546	0	NA
HECW2:NM_020760:chr2:-:3337:3600	Hecw2:NM_001001883:chr1:-:3356:3529	internal	0.122606	0.0825365	1.48547
HERC6:NM_001165136:chr4:+:452:493	Herc6:NM_025992:chr6:+:284:352	internal	0.108755	0.115166	0.944332
HIRA:NM_003325:chr22:-:275:343	Hira:NM_010435:chr16:+:767:856	internal	0.0417556	0	NA
HNRNPR:NM_001102397:chr1:-:174:299	Hnrnpr:NM_001277121:chr4:+:326:463	internal	0.0851862	0.0435147	1.95764
HOXB2:NM_002145:chr17:-:511:708	Hoxb2:NM_134032:chr11:+:564:761	internal	0.161382	0.0620545	2.60065
HOXC10:NM_017409:chr12:+:586:696	Hoxc10:NM_010462:chr15:+:469:585	internal	0.139473	0.114351	1.21969
HTRA2:NM_013247:chr2:+:1194:1226	Htra2:NM_019752:chr6:-:713:769	internal	0.139882	0.172442	0.811181
IFI44:NM_006417:chr1:+:653:742	Ifi44:NM_133871:chr3:-:705:776	internal	0.136252	0.174953	0.778795
IFI44:NM_006417:chr1:+:845:889	Ifi44:NM_133871:chr3:-:834:977	internal	0.164929	0.293754	0.561454
IFI44L:NM_006820:chr1:+:750:854	Ifi44:NM_133871:chr3:-:705:776	internal	0.316291	1.22101	0.259041
IFIH1:NM_022168:chr2:-:408:467	Ifih1:NM_001164477:chr2:-:332:391	internal	0.423064	0.379319	1.11533
IFRD2:NM_006764:chr3:-:505:552	Ifrd2:NM_025903:chr9:+:193:402	internal	0.21992	0.291702	0.753921
IFT80:NM_001190241:chr3:-:1335:1445	Ift80:NM_026641:chr3:-:782:976	internal	0.115358	0	NA
INO80:NM_017553:chr15:-:358:420	Ino80:NM_026574:chr2:-:322:501	internal	0.0657492	0.0857376	0.766865
INPP4B:NM_001101669:chr4:-:842:964	Inpp4b:NM_001024617:chr8:+:523:594	internal	0.14093	0.152219	0.925836
INTS1:NM_001080453:chr7:-:3006:3074	Ints1:NM_026748:chr5:-:3185:3268	internal	0.132586	0.20637	0.642466
IQCJ-SCHIP1:NM_001197113:chr3:+:677:784	Gm21949:NM_001113419:chr3:+:586:684	internal	0.0745145	0.0402611	1.85078
IRF7:NM_001572:chr11:-:1467:1571	Irf7:NM_001252600:chr7:-:1309:1614	internal	0.363715	0.200667	1.81253
ITGAE:NM_002208:chr17:-:3119:3286	Itgae:NM_008399:chr11:+:3088:3177	internal	0.339053	0.360084	0.941593
ITGB8:NM_002214:chr7:+:875:946	Itgb8:NM_177290:chr12:-:615:719	internal	0.142055	0.0702619	2.0218
JARID2:NM_001267040:chr6:+:111:176	Jarid2:NM_001205043:chr13:+:647:712	internal	0.206596	0	NA
JARID2:NM_001267040:chr6:+:303:455	Jarid2:NM_001205043:chr13:+:848:991	internal	0.0286804	0	NA
JMJD1C:NM_032776:chr10:-:472:561	Jmjd1c:NM_207221:chr10:+:181:258	internal	0.0857966	0	NA
KAT6A:NM_001099412:chr8:-:806:850	Kat6a:NM_001081149:chr8:+:756:848	internal	0.0894487	0.174551	0.51245
KAT6B:NM_001256468:chr10:+:801:1034	Kat6b:NM_001205241:chr14:+:401:637	internal	0.115223	0.0587254	1.96206
KDM3A:NM_001146688:chr2:+:3879:3935	Kdm3a:NM_001038695:chr6:-:4014:4070	internal	0.143017	0.0381568	3.74815
KDM6A:NM_021140:chrX:+:850:912	Kdm6a:NM_009483:chrX:+:730:882	internal	0.0217135	0	NA
KDM6B:NM_001080424:chr17:+:797:967	Kdm6b:NM_001017426:chr11:-:600:1001	internal	0.175186	0.0517666	3.38415
KIAA0100:NM_014680:chr17:-:263:484	2610507B11Rik:NM_001002004:chr11:+:256:477	internal	0.112845	0.0899526	1.25449
KIAA0240:NM_015349:chr6:+:167:220	Gltscr1l:NM_001100452:chr17:-:426:479	internal	0.0765868	0	NA
KIAA0317:NM_001039479:chr14:-:608:799	Arel1:NM_178065:chr12:-:735:953	internal	0.0578913	0	NA
KIAA0430:NM_001184998:chr16:-:661:750	Marf1:NM_001081154:chr16:-:671:730	internal	0.155566	0.246228	0.631797
KIAA0922:NM_001131007:chr4:+:1566:1613	D930015E06Rik:NM_172681:chr3:-:1572:1619	internal	0.0568157	0.128824	0.441034
KIAA1841:NM_001129993:chr2:+:791:835	0610010F05Rik:NM_027860:chr11:-:766:810	internal	0.0315564	0	NA
KNTC1:NM_014708:chr12:+:431:502	Kntc1:NM_001042421:chr5:+:407:613	internal	0.2571	0.0758067	3.39152
KRCC1:NM_016618:chr2:-:416:475	Krcc1:NM_145568:chr6:+:437:496	internal	0	0	NA
KRIT1:NM_004912:chr7:-:1754:1804	Krit1:NM_001170552:chr5:+:1229:1279	internal	0.141735	0.116268	1.21903
KRT14:NM_000526:chr17:-:371:412	Krt14:NM_016958:chr11:-:245:424	internal	0.188015	0.121222	1.55099
LATS2:NM_014572:chr13:-:584:634	Lats2:NM_015771:chr14:-:578:625	internal	0.0284446	0.1178	0.241465
LEPR:NM_001003679:chr1:+:315:530	Lepr:NM_001122899:chr4:+:829:894	internal	0.25343	0.708913	0.357491
LIMA1:NM_001113546:chr12:-:508:669	Lima1:NM_001113545:chr15:-:488:715	internal	0.383422	0.482658	0.794398
LIPH:NM_139248:chr3:-:172:378	Liph:NM_001083894:chr16:-:235:492	internal	0.211208	0.165621	1.27525
LMBR1L:NM_018113:chr12:-:505:810	Lmbr1l:NM_029098:chr15:-:337:645	internal	0.104794	0.0530802	1.97425
LPIN2:NM_014646:chr18:-:525:608	Lpin2:NM_001164885:chr17:+:522:605	internal	0.12085	0.0567868	2.12813
LRP1:NM_002332:chr12:+:4767:4820	Lrp1:NM_008512:chr10:-:4669:4818	internal	0	0.149921	0
LYST:NM_000081:chr1:-:317:349	Lyst:NM_010748:chr13:+:224:355	internal	0.128306	0	NA
MACF1:NM_012090:chr1:+:4541:4615	Macf1:NM_001199136:chr4:-:4478:4534	internal	0.220818	0.185387	1.19112
MAFK:NM_002360:chr7:+:290:322	Mafk:NM_010757:chr5:+:297:332	internal	0.0406662	0	NA
MAPK8IP3:NM_001040439:chr16:+:874:1110	Mapk8ip3:NM_001163449:chr17:-:775:1170	internal	0.210153	0.0705556	2.97854
MBD2:NM_003927:chr18:-:404:721	Mbd2:NM_010773:chr18:+:300:626	internal	0.0583321	0.0406145	1.43624
MBD4:NM_003925:chr3:-:270:335	Mbd4:NM_010774:chr6:-:216:263	internal	0.187586	1.82262	0.102921
MBD6:NM_052897:chr12:+:228:470	Mbd6:NM_033072:chr10:-:155:403	internal	0.0829456	0.0677937	1.2235
MDFI:NM_005586:chr6:+:253:318	Mdfi:NM_001109973:chr17:-:436:501	internal	0.141252	0.0636085	2.22065
MDM1:NM_001205028:chr12:-:371:466	Mdm1:NM_001162904:chr10:+:339:491	internal	0.319558	0.647791	0.493304
METTL21B:NM_015433:chr12:+:192:245	LOC100504608:NM_001205036:chr10:-:28:120	internal	0.257782	0.0732588	3.51878
MIB2:NM_001170686:chr1:+:2152:2220	Mib2:NM_001256107:chr4:-:2513:2689	internal	0.265178	0	NA
MLLT6:NM_005937:chr17:+:89:202	Mllt6:NM_139311:chr11:+:236:349	internal	0.0496562	0.0369305	1.34458
MOK:NM_014226:chr14:-:752:841	Stk30:NM_011973:chr12:-:638:802	internal	0.119951	0	NA
MOK:NM_014226:chr14:-:842:931	Stk30:NM_011973:chr12:-:803:892	internal	0.0960705	0.05054	1.90088
MON2:NM_015026:chr12:+:2465:2533	Mon2:NM_001163024:chr10:-:2608:2676	internal	0.0186417	0.194237	0.095974
MREG:NM_018000:chr2:-:435:515	Mreg:NM_001005423:chr1:-:335:415	internal	0.164068	0.061537	2.66617
MSRB3:NM_001031679:chr12:+:509:589	Msrb3:NM_177092:chr10:-:337:495	internal	0.128519	0.0553748	2.3209
MTMR11:NM_001145862:chr1:-:1395:1469	Mtmr11:NM_181409:chr3:+:1382:1456	internal	0.158601	0.0650974	2.43637
MTMR11:NM_001145862:chr1:-:1821:1958	Mtmr11:NM_181409:chr3:+:1751:1945	internal	0.242422	0.33111	0.73215
MTMR11:NM_001145862:chr1:-:2086:2184	Mtmr11:NM_181409:chr3:+:2055:2171	internal	0.0757787	0.122077	0.620748
MTUS1:NM_001001924:chr8:-:3091:3189	Mtus1:NM_001005865:chr8:-:441:644	internal	0.228636	0.366433	0.62395
MTUS1:NM_001001924:chr8:-:3131:3172	Mtus1:NM_001005863:chr8:-:2874:2927	internal	0.190193	0.425611	0.44687
MTUS1:NM_001001924:chr8:-:3421:3594	Mtus1:NM_001005863:chr8:-:3272:3349	internal	0.231211	0.15025	1.53884
MTUS1:NM_001001924:chr8:-:508:606	Mtus1:NM_001005863:chr8:-:413:529	internal	0.53222	0.916406	0.580768
MYBL1:NM_001080416:chr8:-:432:494	Mybl1:NM_008651:chr1:-:286:342	internal	0.0667863	0	NA
MYBPHL:NM_001010985:chr1:-:693:935	Mybphl:NM_026831:chr3:+:570:974	internal	0.139838	0.0779278	1.79446
MYO5B:NM_001080467:chr18:-:4639:4743	Myo5b:NM_201600:chr18:+:4423:4527	internal	0.140839	0	NA
MYO9A:NM_006901:chr15:-:504:626	Myo9a:NM_173018:chr9:+:256:378	internal	0.102827	0.0389639	2.63903
MYO9A:NM_006901:chr15:-:709:828	Myo9a:NM_173018:chr9:+:419:580	internal	0.0972546	0.0715857	1.35858
NARF:NM_001038618:chr17:+:350:448	Narf:NM_026272:chr11:+:141:257	internal	0.214218	0.222401	0.963205
NAV2:NM_001111018:chr11:+:2993:3037	Nav2:NM_001111016:chr7:+:3335:3505	internal	0.193908	0.170969	1.13417
NAV3:NM_014903:chr12:+:537:587	Nav3:NM_001081035:chr10:-:364:414	internal	0.0835367	0	NA
NCOA2:NM_006540:chr8:-:445:516	Ncoa2:NM_001077695:chr1:-:505:576	internal	0.120275	0	NA
NDUFAF6:NM_152416:chr8:+:231:293	Ndufaf6:NM_001085493:chr4:-:237:362	internal	0.324038	0.34718	0.933343
NEDD1:NM_001135175:chr12:+:409:462	Nedd1:NM_008682:chr10:-:346:399	internal	0.0757319	0.115351	0.656535
NFATC3:NM_004555:chr16:+:431:463	Nfatc3:NM_010901:chr8:+:403:435	internal	0	0	NA
NFATC3:NM_004555:chr16:+:509:616	Nfatc3:NM_010901:chr8:+:481:591	internal	0.0764994	0.263548	0.290267
NFX1:NM_002504:chr9:+:199:243	Nfx1:NM_023739:chr4:+:138:182	internal	0.102746	0	NA
NGF:NM_002506:chr1:-:248:346	Ngf:NM_001112698:chr3:+:251:355	internal	0.207152	0.188952	1.09632
NISCH:NM_007184:chr3:+:1845:1952	Nisch:NM_022656:chr14:-:1881:1997	internal	0.158456	0	NA
NKX1-2:NM_001146340:chr10:-:46:252	Nkx1-2:NM_009123:chr7:-:119:325	internal	0.293387	0.154628	1.89737
NMRAL1:NM_020677:chr16:-:455:481	Nmral1:NM_026393:chr16:-:204:230	internal	0.051823	0.301386	0.171949
NOXO1:NM_001267721:chr16:-:1094:1267	Noxo1:NM_027988:chr17:+:1756:1965	internal	0.296748	0.262359	1.13108
NR1D2:NM_001145425:chr3:+:943:1005	Nr1d2:NM_011584:chr14:-:1097:1159	internal	0.0905012	0	NA
NR1H3:NM_001130101:chr11:+:329:589	Nr1h3:NM_001177730:chr2:-:220:345	internal	0.396354	0.325653	1.21711
NR2C2:NM_003298:chr3:+:443:466	Nr2c2:NM_011630:chr6:+:573:596	internal	0	0	NA
NSD1:NM_022455:chr5:+:205:381	Nsd1:NM_008739:chr13:+:178:357	internal	0.015056	0.0519799	0.289651
NSMAF:NM_001144772:chr8:-:296:322	Nsmaf:NM_010945:chr4:-:346:396	internal	0.0561359	0	NA
NXPE3:NM_001134456:chr3:+:1059:1118	Nxpe3:NM_001134457:chr16:-:603:755	internal	0.270818	0.177017	1.5299
OGG1:NM_002542:chr3:+:863:967	Ogg1:NM_010957:chr6:+:770:838	internal	0.226642	0.148165	1.52966
OPN3:NM_014322:chr1:-:669:893	Opn3:NM_010098:chr1:-:590:796	internal	0.178301	0.0431768	4.12955
OSBP2:NM_030758:chr22:+:1044:1106	Osbp2:NM_152818:chr11:-:970:1032	internal	0.0714826	0	NA
OSBP2:NM_030758:chr22:+:1443:1499	Osbp2:NM_152818:chr11:-:1369:1425	internal	0.103799	0	NA
OSBPL1A:NM_001242508:chr18:-:390:428	Osbpl1a:NM_001252489:chr18:-:512:550	internal	0.153394	0.154408	0.993434
OSGEPL1:NM_022353:chr2:-:703:753	Osgepl1:NM_001285839:chr1:+:397:477	internal	0.17395	0.418534	0.415619
PAGR1:NM_024516:chr16:+:338:391	Pagr1a:NM_030240:chr7:-:450:503	internal	0.177579	0.171372	1.03622
PARP2:NM_001042618:chr14:+:101:238	Parp2:NM_009632:chr14:+:48:191	internal	0.324916	0.445379	0.729527
PARP2:NM_005484:chr14:+:131:277	Parp2:NM_009632:chr14:+:48:191	internal	0.39031	0.728319	0.535905
PARP8:NM_001178055:chr5:+:519:608	Parp8:NM_001081009:chr13:-:500:589	internal	0.216539	0	NA
PDE7A:NM_001242318:chr8:-:383:424	Pde7a:NM_001122759:chr3:-:478:519	internal	0.071919	0	NA
PDZD2:NM_178140:chr5:+:887:1123	Pdzd2:NM_001081064:chr15:-:562:798	internal	0.206156	0.24711	0.834266
PER2:NM_022817:chr2:-:986:1084	Per2:NM_011066:chr1:-:917:1015	internal	0.197638	0.157013	1.25874
PGAM1:NM_002629:chr10:+:516:551	Pgam1:NM_023418:chr19:+:655:723	internal	0.150503	0.0714826	2.10545
PGAP2:NM_001145438:chr11:+:626:694	Pgap2:NM_145583:chr7:+:557:697	internal	0.0883672	0.188304	0.46928
PHC2:NM_004427:chr1:-:407:439	Phc2:NM_001195083:chr4:+:405:437	internal	0	0	NA
PHKA1:NM_001122670:chrX:-:2429:2548	Phka1:NM_173021:chrX:-:2216:2395	internal	0.243618	0.174766	1.39397
PHLDA1:NM_007350:chr12:-:244:318	Phlda1:NM_009344:chr10:+:328:747	internal	0.157413	0.0937204	1.6796
PHLDA1:NM_007350:chr12:-:447:488	Phlda1:NM_009344:chr10:+:540:581	internal	0.194332	0	NA
PI4KB:NM_001198773:chr1:-:833:880	Pi4kb:NM_175356:chr3:+:426:473	internal	0.0973759	0.299535	0.32509
PKIA:NM_006823:chr8:+:585:638	Pkia:NM_008862:chr3:+:183:290	internal	0	0	NA
PLEKHA3:NM_019091:chr2:+:486:530	Plekha3:NM_031256:chr2:+:350:412	internal	0.163425	0	NA
POC1B:NM_001199777:chr12:-:731:835	Poc1b:NM_027740:chr10:+:421:501	internal	0.182461	0.0459603	3.96997
PPM1J:NM_005167:chr1:-:277:570	Ppm1j:NM_027982:chr3:+:347:586	internal	0.178194	0.0883864	2.01608
PPP1R15A:NM_014330:chr19:+:1432:1476	Ppp1r15a:NM_008654:chr7:-:1491:1550	internal	0.20395	0.153596	1.32784
PRKCE:NM_005400:chr2:+:276:464	Prkce:NM_011104:chr17:+:887:1189	internal	0.108916	0.0653989	1.66541
PRKD3:NM_005813:chr2:-:679:831	Prkd3:NM_001171004:chr17:-:886:1110	internal	0.144851	0.0282064	5.13542
PRR12:NM_020719:chr19:+:56:85	Prr12:NM_175022:chr7:-:56:85	internal	0	0	NA
PRR16:NM_016644:chr5:+:790:849	Prr16:NM_001081224:chr18:+:535:594	internal	0.112448	0.116453	0.965612
PRSS16:NM_005865:chr6:+:1174:1227	Prss16:NM_019429:chr13:-:1191:1253	internal	0.210979	0.170361	1.23842
PSKH1:NM_006742:chr16:+:264:419	Pskh1:NM_173432:chr8:+:180:419	internal	0.185242	0.0923268	2.00637
PSMB10:NM_002801:chr16:-:591:659	Psmb10:NM_013640:chr8:-:845:937	internal	0.266225	0.136484	1.9506
PTBP3:NM_001163788:chr9:-:367:396	Ptbp3:NM_178164:chr4:-:296:415	internal	0	0.217616	0
PTPN18:NM_014369:chr2:+:457:525	Ptpn18:NM_011206:chr1:+:422:502	internal	0.084088	0.414051	0.203086
PTPN3:NM_001145368:chr9:-:221:304	Ptpn3:NM_011207:chr4:-:292:375	internal	0.211893	0.3043	0.696329
PTPN4:NM_002830:chr2:+:811:957	Ptpn4:NM_019933:chr1:-:227:358	internal	0.113083	0.0424878	2.66155
PTPRJ:NM_002843:chr11:+:1928:2074	Ptprj:NM_001135657:chr2:-:1448:1537	internal	0.397792	0.407951	0.975098
PUM2:NM_015317:chr2:-:120:254	Pum2:NM_001160219:chr12:+:322:471	internal	0.0191634	0.0801975	0.238953
PUM2:NM_015317:chr2:-:30:53	Pum2:NM_001160219:chr12:+:247:270	internal	0	0	NA
PVRL4:NM_030916:chr1:-:1113:1214	Pvrl4:NM_001122680:chr1:+:1348:1377	internal	0.102565	0	NA
PVRL4:NM_030916:chr1:-:1245:1334	Pvrl4:NM_001122680:chr1:+:1447:1539	internal	0.233428	0.229906	1.01532
RAB4B:NM_016154:chr19:+:350:376	Rab4b:NM_029391:chr7:-:331:360	internal	0.0595981	0	NA
RABGAP1:NM_012197:chr9:+:252:290	Rabgap1:NM_001033960:chr2:+:102:254	internal	0.109719	0	NA
RALGAPB:NM_020336:chr20:+:466:519	Ralgapb:NM_177658:chr2:+:472:543	internal	0.051699	0	NA
RBM11:NM_144770:chr21:+:268:357	Rbm11:NM_198302:chr16:+:268:576	internal	0.0472538	0.0480346	0.983745
RGS5:NM_001254748:chr1:-:344:469	Rgs5:NM_009063:chr1:+:198:323	internal	0.189491	0.118132	1.60405
RIN2:NM_001242581:chr20:+:1191:1334	Rin2:NM_028724:chr2:+:1147:1290	internal	0.0875418	0.040412	2.16623
RNF10:NM_014868:chr12:+:817:840	Rnf10:NM_016698:chr5:-:816:839	internal	0	0	NA
RNF180:NM_001113561:chr5:+:1371:1568	Rnf180:NM_027934:chr13:-:1451:1657	internal	0.187138	0.127024	1.47325
RNF44:NM_014901:chr5:-:935:1060	Rnf44:NM_001146025:chr13:-:769:897	internal	0.0968781	0.029152	3.3232
ROS1:NM_002944:chr6:-:378:440	Ros1:NM_011282:chr10:-:470:520	internal	0.115548	0	NA
RPS10-NUDT3:NM_001202470:chr6:-:128:232	Rps10:NM_025963:chr17:-:115:174	internal	0.0780253	0.0576306	1.35389
RTEL1:NM_016434:chr20:+:916:1227	Rtel1:NM_001001882:chr2:+:339:503	internal	0.256554	0.0881869	2.90921
RTEL1:NM_032957:chr20:+:916:1299	Rtel1:NM_001001882:chr2:+:339:503	internal	0.256554	0.0881869	2.90921
RTTN:NM_173630:chr18:-:5404:5505	Rttn:NM_175542:chr18:+:5597:5671	internal	0.273641	0.232916	1.17485
RUSC1:NM_001105203:chr1:+:2018:2428	Rusc1:NM_001083807:chr3:-:2019:2363	internal	0.240705	0.250252	0.961852
SCG5:NM_001144757:chr15:+:580:633	Scg5:NM_009162:chr2:-:563:616	internal	0.10712	0	NA
SDCCAG3:NM_001039707:chr9:-:494:550	Sdccag3:NM_001085407:chr2:-:177:293	internal	0.242928	0.216658	1.12125
SEMA5A:NM_003966:chr5:-:1082:1147	Sema5a:NM_009154:chr15:+:1025:1093	internal	0.124167	0.0536716	2.31346
SENP2:NM_021627:chr3:+:364:399	Senp2:NM_029457:chr16:+:354:389	internal	0.0839735	0	NA
SENP2:NM_021627:chr3:+:430:492	Senp2:NM_029457:chr16:+:420:482	internal	0.0666636	0	NA
SENP5:NM_152699:chr3:+:466:537	Senp5:NM_177103:chr16:-:541:612	internal	0.221783	0.395592	0.560635
SEPP1:NM_001085486:chr5:-:318:1028	Sepp1:NM_001042613:chr15:+:252:848	internal	0.151777	0.758822	0.200017
SEPW1:NM_003009:chr19:+:283:351	Sepw1:NM_009156:chr7:-:173:241	internal	0.109499	0.0615487	1.77906
SERTAD2:NM_014755:chr2:-:328:435	Sertad2:NM_001038625:chr11:+:332:439	internal	0.0514347	0	NA
SETD1B:NM_015048:chr12:+:157:321	Setd1b:NM_001040398:chr5:+:424:588	internal	0.0767576	0	NA
SETD3:NM_032233:chr14:-:307:342	Setd3:NM_028262:chr12:-:276:311	internal	0.186021	0.124454	1.4947
SETD5:NM_001080517:chr3:+:586:636	Setd5:NM_028385:chr6:+:293:391	internal	0	0	NA
SETMAR:NM_001243723:chr3:+:516:602	Setmar:NM_001276356:chr6:+:641:691	internal	0.274172	0.164113	1.67064
SH3BGR:NM_001001713:chr21:+:195:461	Sh3bgr:NM_015825:chr16:+:388:549	internal	0.167709	0.064863	2.58558
SH3RF2:NM_152550:chr5:+:342:419	Sh3rf2:NM_001146299:chr18:+:212:442	internal	0.131856	0.199739	0.660141
SHROOM2:NM_001649:chrX:+:2836:3243	Shroom2:NM_172441:chrX:-:2871:3062	internal	0.600583	0.388613	1.54545
SIAH1:NM_001006610:chr16:-:1193:1222	Siah1a:NM_009172:chr8:-:896:925	internal	0.0510836	0	NA
SIX5:NM_175875:chr19:-:1206:1364	Six5:NM_011383:chr7:+:670:1038	internal	0.271874	0.308889	0.880166
SLC15A3:NM_016582:chr11:-:1636:1773	Slc15a3:NM_023044:chr19:+:1822:1995	internal	0.118391	0.065921	1.79595
SLC19A2:NM_006996:chr1:-:431:496	Slc19a2:NM_001276455:chr1:+:434:691	internal	0.119978	0.12096	0.991877
SLC25A36:NM_001104647:chr3:+:276:368	Slc25a36:NM_138756:chr9:-:131:223	internal	0.0866508	0	NA
SLC27A1:NM_198580:chr19:+:1228:1326	Slc27a1:NM_011977:chr8:+:1314:1481	internal	0.138756	0	NA
SLC27A5:NM_012254:chr19:-:1777:1851	Slc27a5:NM_009512:chr7:-:1794:1844	internal	0.42616	0.349029	1.22099
SLC27A5:NM_012254:chr19:-:1857:1913	Slc27a5:NM_009512:chr7:-:1868:1924	internal	0.232776	0.163344	1.42507
SLC39A10:NM_001127257:chr2:+:452:472	Slc39a10:NM_172653:chr1:-:261:308	internal	0	0.418941	0
SLC44A3:NM_001114106:chr1:+:193:306	Slc44a3:NM_145394:chr3:-:237:350	internal	0.173591	0.0776571	2.23535
SLC44A5:NM_001130058:chr1:-:148:273	Slc44a5:NM_001081263:chr3:+:378:440	internal	0.149474	0.413622	0.361378
SLC44A5:NM_001130058:chr1:-:400:465	Slc44a5:NM_001081263:chr3:+:495:626	internal	0.241901	0.264188	0.91564
SLX4IP:NM_001009608:chr20:+:490:564	Slx4ip:NM_001038641:chr2:+:389:646	internal	0.181355	0.301035	0.602439
SOCS1:NM_003745:chr16:-:185:406	Socs1:NM_001271603:chr16:-:307:531	internal	0.170221	0.0812014	2.09628
SORBS3:NM_001018003:chr8:+:239:271	Sorbs3:NM_001271407:chr14:-:1328:1360	internal	0.0948016	0.921098	0.102922
SP3:NM_001017371:chr2:-:503:544	Sp3:NM_001018042:chr2:-:519:560	internal	0.032452	0	NA
SP3:NM_001017371:chr2:-:595:696	Sp3:NM_001018042:chr2:-:611:712	internal	0.0629414	0	NA
SP3:NM_001017371:chr2:-:895:936	Sp3:NM_001018042:chr2:-:857:952	internal	0.1481	0	NA
SP3:NM_001017371:chr2:-:976:1002	Sp3:NM_001018042:chr2:-:959:1018	internal	0	0	NA
SPAG1:NM_003114:chr8:+:1768:1815	Spag1:NM_012031:chr15:+:1673:1720	internal	0.162695	0.212364	0.766114
SPAG4:NM_003116:chr20:+:1192:1314	Spag4:NM_139151:chr2:+:1230:1352	internal	0.25071	0.0545738	4.59396
SPEG:NM_005876:chr2:+:406:531	Speg:NM_007463:chr1:+:384:680	internal	0.0451787	0.0657537	0.68709
SPRED2:NM_001128210:chr2:-:201:245	Spred2:NM_033523:chr11:+:514:552	internal	0.0379828	0	NA
SPRED2:NM_181784:chr2:-:560:598	Spred2:NM_033523:chr11:+:514:552	internal	0	0	NA
SSBP2:NM_001256732:chr5:-:426:449	Ssbp2:NM_024186:chr13:+:278:337	internal	0.140845	0	NA
ST5:NM_005418:chr11:-:895:981	St5:NM_001001326:chr7:-:615:701	internal	0.101249	0.0500603	2.02254
STAG2:NM_001042749:chrX:+:576:614	Stag2:NM_001077712:chrX:+:542:580	internal	0.0361812	0.142826	0.253323
STX16:NM_001001433:chr20:+:1091:1126	Stx16:NM_001102423:chr2:+:332:550	internal	0.198871	0.0724523	2.74485
STX2:NM_001980:chr12:-:215:313	Stx2:NM_001286033:chr5:-:195:260	internal	0.374202	0.307379	1.2174
SUV39H2:NM_001193424:chr10:+:306:389	Suv39h2:NM_022724:chr2:-:453:536	internal	0.248778	0.3118	0.797876
SYNE3:NM_152592:chr14:-:40:75	Syne3:NM_001042699:chr12:-:317:352	internal	0.0837978	0	NA
TAB2:NM_015093:chr6:+:543:590	Tab2:NM_138667:chr10:-:531:578	internal	0.0628446	0	NA
TAB2:NM_015093:chr6:+:611:646	Tab2:NM_138667:chr10:-:599:634	internal	0.0412386	0	NA
TBC1D14:NM_001113361:chr4:+:1091:1129	Tbc1d14:NM_001113362:chr5:-:1256:1462	internal	0.293754	0.104127	2.8211
TBC1D16:NM_019020:chr17:-:216:518	Tbc1d16:NM_172443:chr11:-:259:561	internal	0.168873	0.13155	1.28372
TBC1D17:NM_001168222:chr19:+:340:411	Tbc1d17:NM_001042655:chr7:-:350:418	internal	0.23884	0.0608442	3.92544
TBC1D2:NM_001267571:chr9:-:404:481	Tbc1d2:NM_198664:chr4:-:383:460	internal	0.231989	0	NA
TCP11L1:NM_001145541:chr11:+:271:336	Tcp11l1:NM_177190:chr2:-:261:326	internal	0.290654	0.527572	0.550927
TEAD2:NM_001256658:chr19:-:169:339	Tead2:NM_001285498:chr7:+:159:395	internal	0.248665	0.0695713	3.57424
TEX2:NM_018469:chr17:-:164:349	Tex2:NM_198292:chr11:-:111:278	internal	0.093614	0.0517308	1.80964
TEX9:NM_198524:chr15:+:474:536	Tex9:NM_009359:chr9:-:407:547	internal	0.36823	0.0376832	9.77175
THAP3:NM_001195752:chr1:+:254:364	Thap3:NM_001145929:chr4:-:191:394	internal	0.342529	0.104524	3.27704
THAP3:NM_001195753:chr1:+:344:457	Thap3:NM_001145929:chr4:-:191:394	internal	0.270429	0.209851	1.28867
THAP4:NM_015963:chr2:-:403:429	Thap4:NM_025920:chr1:-:415:441	internal	0.0549223	0	NA
THAP7:NM_001008695:chr22:-:395:460	Thap7:NM_026909:chr16:-:393:542	internal	0.140662	0.134714	1.04415
THRA:NM_001190918:chr17:+:670:708	Thra:NM_178060:chr11:+:525:563	internal	0.0731512	0	NA
THRA:NM_001190918:chr17:+:852:953	Thra:NM_178060:chr11:+:707:808	internal	0.055408	0	NA
TINF2:NM_001099274:chr14:-:478:525	Tinf2:NM_145705:chr14:-:363:413	internal	0.111154	0.233684	0.47566
TIRAP:NM_001039661:chr11:+:659:823	Tirap:NM_001177845:chr9:-:636:974	internal	0.200902	0.184261	1.09031
TMEM143:NM_018273:chr19:-:98:388	Tmem143:NM_144801:chr7:+:90:380	internal	0.215077	0.0628739	3.42076
TMEM182:NM_144632:chr2:+:341:478	Tmem182:NM_001081198:chr1:+:309:446	internal	0.14888	0.0440977	3.37613
TMEM219:NM_001083613:chr16:+:357:407	Tmem219:NM_026827:chr7:-:309:359	internal	0.153182	0.0890269	1.72063
TMEM241:NM_032933:chr18:-:761:817	Tmem241:NM_001289666:chr18:-:737:799	internal	0.147423	0.126288	1.16735
TMEM39B:NM_018056:chr1:+:670:966	Tmem39b:NM_199305:chr4:-:428:748	internal	0.0139318	0.0709254	0.196429
TMEM5:NM_014254:chr12:+:298:321	Tmem5:NM_153059:chr10:-:228:251	internal	0	0	NA
TMLHE:NM_001184797:chrX:-:527:550	Tmlhe:NM_138758:chrX_GL456233_random:+:484:507	internal	0	0	NA
TNFSF12-TNFSF13:NM_172089:chr17:+:427:486	Tnfsf12:NM_011614:chr11:-:675:734	internal	0.194104	0	NA
TNK1:NM_001251902:chr17:+:897:1019	Tnk1:NM_031880:chr11:-:581:1093	internal	0.316377	0.0293282	10.7875
TNNT1:NM_001126132:chr19:-:279:386	Tnnt1:NM_001277903:chr7:-:246:353	internal	0.175046	0.152576	1.14727
TNRC6A:NM_014494:chr16:+:364:561	Tnrc6a:NM_144925:chr7:+:693:848	internal	0.108202	0.0174784	6.1906
TNRC6A:NM_014494:chr16:+:733:804	Tnrc6a:NM_144925:chr7:+:1020:1088	internal	0.0853456	0.0635387	1.34321
TONSL:NM_013432:chr8:-:397:486	Tonsl:NM_183091:chr15:-:412:495	internal	0.0889512	0.183073	0.485879
TRIO:NM_007118:chr5:+:4153:4194	Trio:NM_001081302:chr15:-:4499:4540	internal	0.106979	0	NA
TRMT10B:NM_144964:chr9:+:165:302	Trmt10b:NM_027266:chr4:+:144:278	internal	0.244349	0.488806	0.499889
TRMT5:NM_020810:chr14:-:108:158	Trmt5:NM_029580:chr12:-:34:93	internal	0.26636	0.46582	0.571809
TRMU:NM_018006:chr22:+:491:556	Trmu:NM_028063:chr15:+:177:242	internal	0.244749	0.0692699	3.53327
TRPM2:NM_003307:chr21:+:3821:3907	Trpm2:NM_138301:chr10:-:4053:4115	internal	0.150762	0.214698	0.702206
TRPM2:NM_003307:chr21:+:3911:4021	Trpm2:NM_138301:chr10:-:4149:4280	internal	0.342155	0.48649	0.703313
TSACC:NM_144627:chr1:+:542:673	Tsacc:NM_029801:chr3:-:278:469	internal	0.256512	0.173163	1.48133
TTC3:NM_001001894:chr21:+:1024:1074	Ttc3:NM_009441:chr16:+:1053:1103	internal	0.0264319	0	NA
TUBB4B:NM_006088:chr9:+:472:507	Tubb4b:NM_146116:chr2:-:482:517	internal	0.0438576	0	NA
TUBD1:NM_001193609:chr17:-:361:396	Tubd1:NM_001199045:chr11:+:455:751	internal	0.0898499	0.114982	0.781426
UBC:NM_021009:chr12:-:1656:1727	Ubc:NM_019639:chr5:-:1324:1380	internal	0.0790468	0.0749913	1.05408
UCP2:NM_003355:chr11:-:660:743	Ucp2:NM_011671:chr7:+:654:779	internal	0.150684	0.147554	1.02122
UNC13B:NM_006377:chr9:+:501:560	Unc13b:NM_001081413:chr4:+:489:548	internal	0.180813	0	NA
UNK:NM_001080419:chr17:+:221:301	Unk:NM_001286006:chr11:+:227:352	internal	0.138976	0.0931966	1.49122
UPF3A:NM_023011:chr13:+:420:482	Upf3a:NM_025924:chr8:+:388:546	internal	0.287195	0.0756405	3.79684
UPF3A:NM_080687:chr13:+:420:500	Upf3a:NM_025924:chr8:+:388:546	internal	0.43593	0.359594	1.21228
USB1:NM_001195302:chr16:+:157:261	Usb1:NM_133954:chr8:+:124:234	internal	0.335792	0.302576	1.10978
USP24:NM_015306:chr1:-:5343:5396	Usp24:NM_183225:chr4:+:5340:5414	internal	0.180129	0.0778064	2.3151
USP36:NM_025090:chr17:-:386:493	Usp36:NM_001033528:chr11:-:458:565	internal	0.221488	0.0647578	3.42026
USP53:NM_019050:chr4:+:1262:1300	Usp53:NM_133857:chr3:-:894:917	internal	0	0	NA
USP53:NM_019050:chr4:+:1266:1355	Usp53:NM_133857:chr3:-:832:972	internal	0.0625603	0	NA
USP53:NM_019050:chr4:+:1364:1471	Usp53:NM_133857:chr3:-:981:1133	internal	0.135466	0.073947	1.83193
USPL1:NM_005800:chr13:+:856:1146	Uspl1:NM_001013378:chr5:+:729:992	internal	0.278818	0.482016	0.578443
VEZT:NM_017599:chr12:+:194:298	Vezt:NM_172538:chr10:-:132:278	internal	0.198452	0.275137	0.721284
VPRBP:NM_001171904:chr3:-:341:382	Vprbp:NM_001015507:chr9:+:327:368	internal	0.0349918	0	NA
VPS13D:NM_015378:chr1:+:1495:1599	Vps13d:NM_001276465:chr4:-:1548:1622	internal	0.209997	0.0597824	3.51268
VWA8:NM_015058:chr13:-:3906:3953	Vwa8:NM_027906:chr14:+:3939:3986	internal	0.157131	0.110538	1.42151
WDR34:NM_052844:chr9:-:368:493	Wdr34:NM_001008498:chr2:-:128:382	internal	0.357187	0.115676	3.08783
WSB1:NM_015626:chr17:+:777:809	Wsb1:NM_019653:chr11:-:692:796	internal	0.0456312	0	NA
XRCC2:NM_005431:chr7:-:186:269	Xrcc2:NM_020570:chr5:-:181:264	internal	0.0947876	0.16347	0.579847
YIPF3:NM_015388:chr6:-:236:286	Yipf3:NM_145353:chr17:+:221:271	internal	0.149822	0	NA
ZBTB5:NM_014872:chr9:-:2053:2112	Zbtb5:NM_001163283:chr4:-:2429:2521	internal	0.140033	0	NA
ZCCHC7:NM_032226:chr9:+:213:248	Zcchc7:NM_138590:chr4:+:195:230	internal	0.0775773	0	NA
ZDHHC8:NM_001185024:chr22:+:258:416	Zdhhc8:NM_172151:chr16:-:277:435	internal	0.121308	0.0254685	4.76306
ZFP90:NM_133458:chr16:+:933:1274	Zfp90:NM_011764:chr8:+:1108:1461	internal	0.472338	0.334658	1.41141
ZFP91:NM_001197051:chr11:+:745:819	Zfp91:NM_053009:chr19:-:1190:1450	internal	0.109246	0.0812872	1.34395
ZFP91:NM_053023:chr11:+:745:822	Zfp91:NM_053009:chr19:-:1190:1450	internal	0.105432	0	NA
ZNF131:NM_003432:chr5:+:51:101	Zfp131:NM_028245:chr13:-:49:99	internal	0.0273043	0	NA
ZNF365:NM_014951:chr10:+:497:613	Zfp365:NM_178679:chr10:-:487:606	internal	0.426872	0.204129	2.09119
ZNF365:NM_014951:chr10:+:718:927	Zfp365:NM_178679:chr10:-:600:815	internal	0.241367	0.505499	0.477483
ZNF410:NM_001242924:chr14:+:949:1029	Zfp410:NM_001252582:chr12:+:925:1026	internal	0.15368	0.163434	0.940319
ZNF420:NM_144689:chr19:+:1554:1937	Zfp420:NM_172740:chr7:+:1451:2032	internal	0.211891	0.0426363	4.96974
ZNF561:NM_152289:chr19:-:626:745	Zfp266:NM_001082485:chr9:-:1029:1118	internal	0.289975	0.371712	0.780107
ZWILCH:NM_017975:chr15:+:307:372	Zwilch:NM_026507:chr9:-:98:187	internal	0.116184	0.246495	0.471345
ZZZ3:NM_015534:chr1:-:1161:1193	Zzz3:NM_001080755:chr3:+:1113:1184	internal	0.088889	0.790434	0.112456
ZZZ3:NM_015534:chr1:-:984:1016	Zzz3:NM_001080755:chr3:+:924:1007	internal	0	0.191011	0
