# Supplementary material for: Many lncRNAs, 5’UTRs, and pseudogenes are translated and some are likely to express functional proteins
Source: eLife journal article supplement (doi:10.7554/elife.08890), 2015-12-19
Supplement: supp [file elife-08890-supp-v1.zip › elife_poa_e08890_Supplementary_File_3.xlsx]

## Sheet: high.uORF
ABCA12:NM_173076:chr2:-:105:113
ABCC5:NM_001023587:chr3:-:118:123
ABI2:NM_005759:chr2:+:206:232
ABLIM1:NM_006720:chr10:-:114:119
ABLIM1:NM_006720:chr10:-:74:112
ACVR1:NM_001105:chr2:-:399:404
ADAM17:NM_003183:chr2:-:109:114
ADAM19:NM_033274:chr5:-:45:50
ADAM9:NM_003816:chr8:+:15:53
ADAMTSL4:NM_019032:chr1:+:172:183
ADARB1:NM_001112:chr21:+:237:260
ADAT1:NM_012091:chr16:-:127:138
ADCY7:NM_001114:chr16:+:36:65
ADD2:NM_001185055:chr2:-:71:100
ADIPOR1:NM_015999:chr1:-:164:169
AFF1:NM_001166693:chr4:+:239:265
AFF4:NM_014423:chr5:-:194:199
AGAP1:NM_001037131:chr2:+:409:417
AGBL5:NM_001035507:chr2:+:198:260
AGXT2L2:NM_153373:chr5:-:89:139
AHDC1:NM_001029882:chr1:-:236:385
AKTIP:NM_001012398:chr16:-:172:186
ALG13:NM_001257231:chrX:+:159:626
ALG13:NM_001257231:chrX:+:49:204
ALKBH3:NM_139178:chr11:+:378:386
ALPK1:NM_001102406:chr4:+:147:155
AMD1:NM_001033059:chr6:+:11:31
AMZ2:NM_001033569:chr17:+:95:115
AMZ2:NM_001033574:chr17:+:206:217
ANAPC11:NM_001002246:chr17:+:126:146
ANAPC5:NM_016237:chr12:-:41:46
ANKRA2:NM_023039:chr5:-:85:102
ANKRD11:NM_001256182:chr16:-:25:90
ANKRD11:NM_001256182:chr16:-:406:483
ANKRD11:NM_001256182:chr16:-:464:505
ANKRD11:NM_001256183:chr16:-:335:409
ANKRD11:NM_001256183:chr16:-:393:431
ANKRD13C:NM_030816:chr1:-:25:51
ANKRD50:NM_020337:chr4:-:323:328
ANKRD9:NM_152326:chr14:-:563:571
ANXA8L2:NM_001630:chr10:+:145:186
AP1S3:NM_001039569:chr2:-:36:44
AP4B1:NM_001253852:chr1:-:169:174
APBA3:NM_004886:chr19:-:150:161
ARAF:NM_001256196:chrX:+:119:148
ARAP1:NM_001040118:chr11:-:80:100
ARAP3:NM_022481:chr5:-:63:71
ARF6:NM_001663:chr14:+:168:176
ARHGAP11A:NM_014783:chr15:+:102:158
ARHGAP11A:NM_014783:chr15:+:537:542
ARHGAP12:NM_001270695:chr10:-:200:205
ARHGAP17:NM_001006634:chr16:-:21:26
ARHGAP22:NM_001256024:chr10:-:104:133
ARHGAP5:NM_001030055:chr14:+:151:222
ARHGEF11:NM_014784:chr1:-:634:660
ARHGEF11:NM_014784:chr1:-:857:904
ARHGEF12:NM_001198665:chr11:+:205:216
ARHGEF9:NM_001173480:chrX:-:293:325
ARID3A:NM_005224:chr19:+:33:44
ARID3A:NM_005224:chr19:+:92:115
ARIH2:NM_006321:chr3:+:151:183
ARL14EP:NM_152316:chr11:+:113:121
ARL5A:NM_001037174:chr2:-:92:139
ARL5A:NM_177985:chr2:-:92:175
ARL6:NM_032146:chr3:+:105:110
ARMC10:NM_001161009:chr7:+:295:543
ARMC10:NM_001161010:chr7:+:295:636
ARMCX6:NM_019007:chrX:-:127:276
ARRDC3:NM_020801:chr5:-:94:108
ARSG:NM_014960:chr17:+:117:302
ASAP1:NM_001247996:chr8:-:168:176
ASB8:NM_024095:chr12:-:148:153
ASCC3:NM_006828:chr6:-:260:274
ASNSD1:NM_019048:chr2:+:122:412
ASPHD2:NM_020437:chr22:+:223:228
ATF2:NM_001256090:chr2:-:136:144
ATF2:NM_001256090:chr2:-:165:176
ATF4:NM_001675:chr22:+:22:27
ATF4:NM_001675:chr22:+:84:95
ATF4:NM_182810:chr22:+:183:362
ATF5:NM_001193646:chr19:+:131:142
ATF5:NM_001193646:chr19:+:253:432
ATF5:NM_012068:chr19:+:157:327
ATF5:NM_012068:chr19:+:70:81
ATG13:NM_001142673:chr11:+:313:360
ATM:NM_000051:chr11:+:361:381
ATP6V1C1:NM_001695:chr8:+:120:131
ATP8B3:NM_138813:chr19:-:230:238
ATPAF2:NM_145691:chr17:-:7:30
ATXN1:NM_000332:chr6:-:234:371
ATXN1:NM_000332:chr6:-:341:403
ATXN1:NM_000332:chr6:-:556:627
ATXN1:NM_001128164:chr6:-:62:322
ATXN7:NM_000333:chr3:+:487:504
AVL9:NM_015060:chr7:+:34:51
AVPI1:NM_021732:chr10:-:300:311
AZI2:NM_001134432:chr3:-:344:430
AZIN1:NM_015878:chr8:-:411:467
BABAM1:NM_001033549:chr19:+:41:55
BACE1:NM_012104:chr11:-:55:66
BAK1:NM_001188:chr6:-:135:152
BAP1:NM_004656:chr3:-:86:118
BBIP1:NM_001195304:chr10:-:238:309
BCS1L:NM_001257342:chr2:+:104:109
BDP1:NM_018429:chr5:+:72:134
BIRC2:NM_001166:chr11:+:257:289
BIRC2:NM_001166:chr11:+:494:514
BIRC3:NM_001165:chr11:+:194:205
BIRC3:NM_001165:chr11:+:297:311
BIRC3:NM_001165:chr11:+:314:376
BIRC3:NM_001165:chr11:+:96:152
BIVM:NM_001159596:chr13:+:173:274
BMI1:NM_005180:chr10:+:9:17
BMP2K:NM_017593:chr4:+:33:38
BMPR2:NM_001204:chr2:+:542:607
BRD4:NM_014299:chr19:-:203:208
BRD4:NM_014299:chr19:-:208:255
BRWD3:NM_153252:chrX:-:91:114
BSCL2:NM_001130702:chr11:-:97:171
BTBD1:NM_001011885:chr15:-:155:178
BTBD7:NM_001002860:chr14:-:24:62
BTN2A1:NM_001197233:chr6:+:31:42
BTN3A1:NM_001145008:chr6:+:63:128
BTN3A2:NM_001197247:chr6:+:117:131
C10orf2:NM_001163812:chr10:+:288:356
C10orf2:NM_001163812:chr10:+:31:81
C10orf2:NM_001163813:chr10:+:31:114
C11orf24:NM_022338:chr11:-:145:330
C11orf30:NM_020193:chr11:+:81:356
C11orf48:NM_024099:chr11:-:22:420
C11orf74:NM_138787:chr11:+:21:32
C11orf74:NM_138787:chr11:+:63:110
C11orf82:NM_145018:chr11:+:159:173
C12orf49:NM_024738:chr12:-:51:65
C12orf52:NM_032848:chr12:+:165:239
C12orf52:NM_032848:chr12:+:17:73
C12orf52:NM_032848:chr12:+:248:298
C12orf52:NM_032848:chr12:+:264:317
C12orf52:NM_032848:chr12:+:379:471
C16orf52:NM_001164579:chr16:+:100:117
C17orf58:NM_181655:chr17:-:176:394
C18orf25:NM_001008239:chr18:+:356:364
C18orf54:NM_173529:chr18:+:22:108
C19orf48:NM_199249:chr19:-:360:377
C19orf48:NM_199249:chr19:-:428:445
C19orf48:NM_199249:chr19:-:460:651
C19orf48:NM_199249:chr19:-:736:783
C19orf48:NM_199250:chr19:-:136:282
C1orf172:NM_152365:chr1:-:81:89
C1orf21:NM_030806:chr1:+:414:431
C1orf43:NM_001098616:chr1:-:237:275
C20orf197:NM_173644:chr20:+:39:119
C20orf27:NM_001039140:chr20:-:166:180
C2CD3:NM_015531:chr11:-:159:230
C2orf42:NM_017880:chr2:-:141:206
C2orf74:NM_001143960:chr2:+:20:109
C4orf33:NM_173487:chr4:+:151:162
C4orf36:NM_144645:chr4:-:282:287
C5orf28:NM_022483:chr5:-:79:84
C6orf1:NM_001008703:chr6:-:188:217
C6orf1:NM_001008703:chr6:-:222:530
C6orf1:NM_001008704:chr6:-:222:470
C6orf1:NM_178508:chr6:-:156:209
C7orf49:NM_001243749:chr7:-:458:469
C9orf37:NM_032937:chr9:-:132:203
C9orf37:NM_032937:chr9:-:341:376
C9orf37:NM_032937:chr9:-:475:483
C9orf69:NM_152833:chr9:-:283:444
C9orf69:NM_152833:chr9:-:96:110
C9orf72:NM_001256054:chr9:-:180:185
CAAP1:NM_001167575:chr9:-:93:116
CACUL1:NM_153810:chr10:-:392:397
CALHM2:NM_015916:chr10:-:439:483
CAMK2N1:NM_018584:chr1:-:582:587
CAMKK2:NM_001270485:chr12:-:132:158
CAMSAP2:NM_203459:chr1:+:225:230
CANT1:NM_001159772:chr17:-:370:378
CANT1:NM_138793:chr17:-:418:423
CARD8:NM_001184901:chr19:-:29:115
CARD8:NM_001184902:chr19:-:266:337
CARD8:NM_001184902:chr19:-:61:252
CARD8:NM_001184904:chr19:-:61:270
CARD8:NM_014959:chr19:-:29:97
CASD1:NM_022900:chr7:+:213:284
CASP8AP2:NM_001137667:chr6:+:87:98
CBWD1:NM_001145355:chr9:-:106:282
CBWD3:NM_201453:chr9:-:94:102
CCDC101:NM_138414:chr16:+:72:77
CCDC102A:NM_033212:chr16:-:123:170
CCDC109B:NM_017918:chr4:+:94:105
CCDC142:NM_032779:chr2:-:217:369
CCDC41:NM_001042399:chr12:-:300:311
CCDC85B:NM_006848:chr11:+:357:413
CCDC88A:NM_001135597:chr2:-:152:181
CCM2:NM_001167934:chr7:+:77:82
CCNB1IP1:NM_021178:chr14:-:261:278
CCNB1IP1:NM_021178:chr14:-:66:185
CCNC:NM_005190:chr6:-:184:192
CCNI:NM_006835:chr4:-:253:270
CCNK:NM_001099402:chr14:+:24:56
CDADC1:NM_001193478:chr13:+:77:130
CDC42BPA:NM_003607:chr1:-:82:108
CDC42BPB:NM_006035:chr14:-:73:84
CDC42EP1:NM_152243:chr22:+:240:281
CDC42EP1:NM_152243:chr22:+:372:380
CDC42EP3:NM_001270436:chr2:-:210:218
CDC42EP3:NM_001270436:chr2:-:315:323
CDC42EP3:NM_006449:chr2:-:660:668
CDC7:NM_001134420:chr1:+:216:221
CDH24:NM_022478:chr14:-:146:154
CDK12:NM_015083:chr17:+:407:412
CDK13:NM_003718:chr7:+:218:232
CDK16:NM_006201:chrX:+:118:138
CDK16:NM_006201:chrX:+:293:406
CDK5RAP2:NM_001011649:chr9:-:20:40
CDK6:NM_001145306:chr7:-:155:169
CDKN2C:NM_078626:chr1:+:317:331
CDR2:NM_001802:chr16:-:38:52
CDS1:NM_001263:chr4:+:315:332
CEBPG:NM_001252296:chr19:+:94:99
CENPA:NM_001042426:chr2:+:64:69
CENPF:NM_016343:chr1:+:144:155
CENPK:NM_001267038:chr5:-:68:76
CENPN:NM_001100624:chr16:+:770:832
CEP128:NM_152446:chr14:-:68:79
CEP164:NM_014956:chr11:+:84:116
CEP170:NM_001042404:chr1:-:368:376
CEP250:NM_007186:chr20:+:397:450
CEP250:NM_007186:chr20:+:541:579
CEP350:NM_014810:chr1:+:52:81
CEP68:NM_015147:chr2:+:117:167
CEP70:NM_024491:chr3:-:90:113
CEP89:NM_032816:chr19:-:49:321
CES2:NM_003869:chr16:+:106:234
CES2:NM_003869:chr16:+:423:473
CES2:NM_003869:chr16:+:84:134
CFLAR:NM_001127183:chr2:+:387:437
CHAMP1:NM_001164144:chr13:+:222:227
CHAMP1:NM_001164144:chr13:+:229:243
CHD2:NM_001042572:chr15:+:495:506
CHD4:NM_001273:chr12:-:98:103
CHD9:NM_025134:chr16:+:64:114
CHN1:NM_001206602:chr2:-:72:77
CHPF2:NM_019015:chr7:+:734:790
CHST10:NM_004854:chr2:-:343:348
CHST11:NM_001173982:chr12:+:79:87
CHST12:NM_001243794:chr7:+:98:127
CHST15:NM_001270764:chr10:-:201:206
CHST15:NM_001270764:chr10:-:55:66
CHST2:NM_004267:chr3:+:136:198
CHST2:NM_004267:chr3:+:287:424
CHSY1:NM_014918:chr15:-:236:250
CIDEB:NM_014430:chr14:-:392:412
CIDEB:NM_014430:chr14:-:831:893
CIDEB:NM_014430:chr14:-:901:1020
CLASP1:NM_001142273:chr2:-:106:117
CLCA2:NM_006536:chr1:+:114:137
CLEC2B:NM_005127:chr12:-:604:621
CLIP2:NM_003388:chr7:+:240:263
CLN8:NM_018941:chr8:+:189:200
CLOCK:NM_001267843:chr4:-:503:523
CLOCK:NM_001267843:chr4:-:894:941
CMSS1:NM_032359:chr3:+:115:144
CNOT1:NM_001265612:chr16:-:164:205
CNTROB:NM_001037144:chr17:+:325:348
CNTROB:NM_001037144:chr17:+:367:420
COASY:NM_025233:chr17:+:259:264
COL12A1:NM_004370:chr6:-:139:150
COL17A1:NM_000494:chr10:-:164:178
COL4A2:NM_001846:chr13:+:208:231
COL4A3BP:NM_005713:chr5:-:22:45
COL4A5:NM_000495:chrX:+:213:227
COL4A6:NM_001847:chrX:-:73:78
COL6A3:NM_004369:chr2:-:188:208
CORO2B:NM_006091:chr15:+:70:87
COX16:NM_001204090:chr14:-:128:223
COX16:NM_016468:chr14:-:128:247
CPED1:NM_024913:chr7:+:107:208
CPED1:NM_024913:chr7:+:175:258
CPS1:NM_001122633:chr2:+:30:35
CPS1:NM_001122633:chr2:+:61:72
CRAT:NM_000755:chr9:-:168:185
CRB3:NM_139161:chr19:+:73:81
CRLS1:NM_019095:chr20:+:33:113
CSGALNACT2:NM_018590:chr10:+:101:145
CSK:NM_004383:chr15:+:568:591
CSNK1A1:NM_001025105:chr5:-:192:212
CSNK1G1:NM_022048:chr15:-:264:275
CTAGE5:NM_001247989:chr14:+:115:120
CTBP1:NM_001012614:chr4:-:165:215
CTBP1:NM_001012614:chr4:-:291:389
CTBP2:NM_001329:chr10:-:79:90
CTDSP2:NM_005730:chr12:-:260:277
CTDSPL2:NM_016396:chr15:+:270:284
CTDSPL2:NM_016396:chr15:+:398:412
CUL3:NM_001257197:chr2:-:328:333
CUL5:NM_003478:chr11:+:469:474
CUX1:NM_001202543:chr7:+:117:173
CWC15:NM_016403:chr11:-:66:80
CXorf40A:NM_001171907:chrX:+:281:373
CXorf40A:NM_001171907:chrX:+:62:121
CXorf40A:NM_001171908:chrX:+:281:322
CXorf40A:NM_178124:chrX:+:331:525
CXorf40B:NM_001013845:chrX:-:47:73
CYB5RL:NM_001031672:chr1:-:219:320
CYLD:NM_001042355:chr16:+:97:132
DAB2:NM_001244871:chr5:-:399:422
DARS2:NM_018122:chr1:+:324:332
DBF4B:NM_025104:chr17:+:142:213
DBF4B:NM_025104:chr17:+:92:100
DCAF11:NM_001163484:chr14:+:118:141
DCAF11:NM_001163484:chr14:+:264:272
DCAF16:NM_017741:chr4:-:513:551
DCAF5:NM_003861:chr14:-:97:108
DCBLD2:NM_080927:chr3:-:337:384
DCLRE1B:NM_022836:chr1:+:203:277
DCP2:NM_001242377:chr5:+:195:410
DCUN1D3:NM_173475:chr16:-:57:68
DDB2:NM_000107:chr11:+:150:164
DDIT3:NM_001195053:chr12:-:37:141
DDX23:NM_004818:chr12:-:37:60
DEPDC1:NM_001114120:chr1:-:89:109
DEXI:NM_014015:chr16:-:10:60
DGCR6L:NM_033257:chr22:-:59:67
DGCR8:NM_001190326:chr22:+:71:94
DHX34:NM_014681:chr19:+:95:136
DHX38:NM_014003:chr16:+:222:257
DICER1:NM_177438:chr14:-:36:44
DIP2A:NM_001146114:chr21:+:79:84
DLC1:NM_006094:chr8:-:198:206
DLC1:NM_006094:chr8:-:59:118
DMXL1:NM_005509:chr5:+:139:171
DNAJC10:NM_001271581:chr2:+:403:414
DNAJC14:NM_032364:chr12:-:163:180
DNAJC24:NM_181706:chr11:+:71:76
DNASE1L1:NM_001009932:chrX:-:508:525
DOK4:NM_018110:chr16:-:76:102
DPH2:NM_001039589:chr1:+:39:116
DPP9:NM_139159:chr19:-:98:115
DR1:NM_001938:chr1:+:196:204
DROSHA:NM_001100412:chr5:-:278:283
DROSHA:NM_001100412:chr5:-:295:330
DROSHA:NM_001100412:chr5:-:369:377
DSE:NM_001080976:chr6:+:153:197
DSEL:NM_032160:chr18:-:379:474
DSEL:NM_032160:chr18:-:498:575
DTD2:NM_080664:chr14:-:41:49
DTX3:NM_178502:chr12:+:19:72
DUSP14:NM_007026:chr17:+:268:279
DUSP18:NM_152511:chr22:-:287:481
DUSP22:NM_020185:chr6:+:381:389
DUSP4:NM_001394:chr8:-:280:285
DVL3:NM_004423:chr3:+:35:43
DYRK1A:NM_001396:chr21:+:50:58
DYRK1B:NM_004714:chr19:-:119:544
DZIP1:NM_014934:chr13:-:399:599
E2F1:NM_005225:chr20:-:84:134
E2F6:NM_198256:chr2:-:32:52
E2F7:NM_203394:chr12:-:136:156
EDEM1:NM_014674:chr3:+:109:270
EDEM2:NM_001145025:chr20:-:43:84
EDEM3:NM_025191:chr1:-:208:231
EED:NM_003797:chr11:+:176:181
EGFLAM:NM_182801:chr5:+:186:245
EGFLAM:NM_182801:chr5:+:5:136
EIF4G2:NM_001042559:chr11:-:131:181
ELF2:NM_006874:chr4:-:270:275
ELF4:NM_001127197:chrX:-:122:133
ELFN2:NM_052906:chr22:-:337:426
ELK1:NM_001114123:chrX:-:299:307
ELK1:NM_005229:chrX:-:121:201
ELK3:NM_005230:chr12:+:46:54
ELMOD3:NM_001135021:chr2:+:113:208
ELMOD3:NM_001135022:chr2:+:314:376
ELMSAN1:NM_001043318:chr14:-:115:132
ELOVL5:NM_001242828:chr6:-:351:359
ELP5:NM_015362:chr17:+:85:90
EMB:NM_198449:chr5:-:42:62
EMILIN1:NM_007046:chr2:+:464:475
ENAH:NM_001008493:chr1:-:303:311
ENOX2:NM_006375:chrX:-:231:239
ENTPD5:NM_001249:chr14:-:101:160
ENTPD6:NM_001247:chr20:+:162:179
ENTPD6:NM_001247:chr20:+:176:202
ENTPD7:NM_020354:chr10:+:99:149
EPN1:NM_001130072:chr19:+:207:230
EPN2:NM_014964:chr17:+:205:273
EPS15:NM_001981:chr1:-:78:119
ERAP2:NM_001130140:chr5:+:217:267
ERBB2:NM_004448:chr17:+:212:232
ERBB2:NM_004448:chr17:+:41:52
ERBB2IP:NM_001006600:chr5:+:184:219
ERBB3:NM_001005915:chr12:+:115:138
ERC1:NM_178039:chr12:+:87:95
ERCC1:NM_202001:chr19:-:129:140
ERCC6L2:NM_001010895:chr9:+:150:239
ERCC6L2:NM_001010895:chr9:+:299:538
ERCC8:NM_000082:chr5:-:30:170
ERGIC2:NM_016570:chr12:-:67:108
ERV3-1:NM_001007253:chr7:-:104:247
ERVMER34-1:NM_001242690:chr4:-:438:455
ESCO1:NM_052911:chr18:-:163:270
ESCO1:NM_052911:chr18:-:276:377
ESRRA:NM_004451:chr11:+:133:168
ETAA1:NM_019002:chr2:+:33:68
ETAA1:NM_019002:chr2:+:98:103
ETV1:NM_004956:chr7:-:613:618
ETV5:NM_004454:chr3:-:203:328
ETV6:NM_001987:chr12:+:154:174
EVA1C:NM_058187:chr21:+:335:340
EVI2B:NM_006495:chr17:-:81:92
EXT1:NM_000127:chr8:-:220:267
EXTL3:NM_001440:chr8:+:201:251
EXTL3:NM_001440:chr8:+:327:359
EXTL3:NM_001440:chr8:+:76:123
F2RL2:NM_001256566:chr5:-:106:129
F2RL2:NM_004101:chr5:-:127:141
FAM109A:NM_001177996:chr12:-:145:195
FAM110A:NM_001042353:chr20:+:325:354
FAM122A:NM_138333:chr9:+:64:84
FAM122B:NM_001166599:chrX:-:36:41
FAM126A:NM_032581:chr7:-:85:111
FAM13A:NM_014883:chr4:-:33:74
FAM13A:NM_014883:chr4:-:76:183
FAM13B:NM_001101800:chr5:-:372:419
FAM149B1:NM_173348:chr10:+:37:84
FAM149B1:NM_173348:chr10:+:62:106
FAM160A2:NM_001098794:chr11:-:92:106
FAM167A:NM_053279:chr8:-:292:324
FAM188A:NM_024948:chr10:-:47:55
FAM189B:NM_001267608:chr1:-:140:175
FAM189B:NM_001267608:chr1:-:329:622
FAM196B:NM_001129891:chr5:-:1146:1163
FAM196B:NM_001129891:chr5:-:1223:1327
FAM196B:NM_001129891:chr5:-:354:386
FAM196B:NM_001129891:chr5:-:545:583
FAM196B:NM_001129891:chr5:-:738:875
FAM198B:NM_001031700:chr4:-:339:410
FAM200B:NM_001145191:chr4:+:180:203
FAM200B:NM_001145191:chr4:+:243:299
FAM208B:NM_017782:chr10:+:38:85
FAM214B:NM_025182:chr9:-:121:270
FAM214B:NM_025182:chr9:-:153:173
FAM217B:NM_001190826:chr20:+:218:244
FAM217B:NM_001190826:chr20:+:344:388
FAM217B:NM_001190827:chr20:+:50:178
FAM24B:NM_001204364:chr10:-:114:236
FAM35A:NM_019054:chr10:+:59:214
FAM63B:NM_001040450:chr15:+:132:179
FAM81A:NM_152450:chr15:+:76:123
FAM83B:NM_001010872:chr6:+:73:99
FAM83B:NM_001010872:chr6:+:77:88
FAM96A:NM_001014812:chr15:-:224:307
FANCB:NM_001018113:chrX:-:61:75
FASTK:NM_001258461:chr7:-:94:120
FBXL16:NM_153350:chr16:-:245:262
FBXL4:NM_012160:chr6:-:176:202
FBXO46:NM_001080469:chr19:-:27:92
FBXW5:NM_018998:chr9:-:176:241
FGF1:NM_001144892:chr5:-:39:89
FGF7:NM_002009:chr15:+:127:174
FGFR1:NM_001174063:chr8:-:524:550
FGL1:NM_147203:chr8:-:125:178
FIS1:NM_016068:chr7:-:42:53
FIZ1:NM_032836:chr19:-:32:55
FJX1:NM_014344:chr11:+:329:415
FKTN:NM_001079802:chr9:+:163:216
FKTN:NM_001079802:chr9:+:56:70
FLCN:NM_144606:chr17:-:312:374
FLYWCH1:NM_020912:chr16:+:258:287
FOXA1:NM_004496:chr14:-:119:154
FOXM1:NM_001243088:chr12:-:230:250
FOXM1:NM_001243088:chr12:-:257:283
FOXP1:NM_001012505:chr3:-:282:326
FOXP1:NM_001244813:chr3:-:86:121
FRMD6:NM_001042481:chr14:+:365:379
FRS2:NM_001042555:chr12:+:245:262
FTSJD1:NM_001099642:chr16:-:210:230
FUNDC2:NM_023934:chrX:+:78:83
FUT10:NM_032664:chr8:-:129:140
FUT10:NM_032664:chr8:-:166:447
FUT10:NM_032664:chr8:-:209:298
FUT8:NM_178155:chr14:+:1614:1622
FUZ:NM_001171937:chr19:-:147:167
FZD3:NM_017412:chr8:+:164:178
FZD3:NM_017412:chr8:+:223:252
GALNT11:NM_022087:chr7:+:202:222
GAS1:NM_002048:chr9:-:280:291
GAS2L1:NM_006478:chr22:+:118:141
GBP3:NM_018284:chr1:-:160:168
GBP3:NM_018284:chr1:-:194:226
GBP3:NM_018284:chr1:-:93:104
GCC1:NM_024523:chr7:-:38:58
GIPC1:NM_005716:chr19:-:135:140
GJC1:NM_005497:chr17:-:91:111
GLT8D2:NM_031302:chr12:-:117:128
GLTSCR1:NM_015711:chr19:+:87:137
GMCL1:NM_178439:chr2:+:53:112
GMEB2:NM_012384:chr20:-:84:95
GNAZ:NM_002073:chr22:+:264:317
GNB1L:NM_053004:chr22:-:54:59
GOLGA3:NM_001172557:chr12:-:43:78
GON4L:NM_001037533:chr1:-:24:47
GPBP1:NM_001127235:chr5:+:19:36
GPBP1:NM_001127235:chr5:+:360:377
GPBP1:NM_001127235:chr5:+:384:410
GPBP1:NM_001127235:chr5:+:451:468
GPBP1:NM_001127235:chr5:+:703:711
GPBP1:NM_001127235:chr5:+:790:801
GPBP1:NM_001127235:chr5:+:962:973
GPBP1L1:NM_021639:chr1:-:123:137
GPBP1L1:NM_021639:chr1:-:245:268
GPBP1L1:NM_021639:chr1:-:310:324
GPBP1L1:NM_021639:chr1:-:503:511
GPBP1L1:NM_021639:chr1:-:676:699
GPBP1L1:NM_021639:chr1:-:744:824
GPBP1L1:NM_021639:chr1:-:757:774
GPBP1L1:NM_021639:chr1:-:785:805
GPBP1L1:NM_021639:chr1:-:898:912
GPBP1L1:NM_021639:chr1:-:941:991
GPBP1L1:NM_021639:chr1:-:992:1000
GPER:NM_001039966:chr7:+:383:511
GPER:NM_001039966:chr7:+:663:767
GPER:NM_001505:chr7:+:383:643
GPHN:NM_001024218:chr14:+:1013:1024
GPR125:NM_145290:chr4:-:64:75
GPR126:NM_001032394:chr6:+:258:281
GPR137:NM_001170881:chr11:+:298:303
GPR160:NM_014373:chr3:+:173:412
GPR160:NM_014373:chr3:+:349:459
GPR68:NM_001177676:chr14:-:232:249
GPR87:NM_023915:chr3:-:119:169
GTDC1:NM_001006636:chr2:-:157:162
GTF2A2:NM_004492:chr15:-:140:151
GTF2H2D:NM_001042490:chr5:+:158:262
GTF2I:NM_001163636:chr7:+:137:157
GTF2I:NM_001163636:chr7:+:183:194
GUCD1:NM_031444:chr22:-:266:271
GUF1:NM_021927:chr4:+:155:187
H3F3B:NM_005324:chr17:-:100:108
HAUS6:NM_001270890:chr9:-:180:227
HBS1L:NM_001145158:chr6:-:102:152
HCFC1:NM_005334:chrX:-:3:29
HDLBP:NM_001243900:chr2:-:77:88
HEATR5A:NM_015473:chr14:-:154:159
HELQ:NM_133636:chr4:-:120:161
HELZ:NM_014877:chr17:-:34:42
HERC3:NM_001271602:chr4:+:189:203
HIPK2:NM_001113239:chr7:-:182:199
HIPK2:NM_001113239:chr7:-:246:350
HIPK3:NM_001048200:chr11:+:113:139
HMBOX1:NM_001135726:chr8:+:13:54
HMGB1:NM_002128:chr13:-:143:160
HMGXB3:NM_014983:chr5:+:409:606
HMGXB4:NM_001003681:chr22:+:56:103
HNRNPA1L2:NM_001011724:chr13:+:69:98
HNRNPUL1:NM_007040:chr19:+:107:112
HNRPLL:NM_138394:chr2:-:169:183
HPS1:NM_000195:chr10:-:149:271
HPS4:NM_022081:chr22:-:174:203
HPS4:NM_022081:chr22:-:203:262
HPS4:NM_022081:chr22:-:638:667
HR:NM_005144:chr8:-:344:448
HR:NM_005144:chr8:-:58:108
HS3ST1:NM_005114:chr4:-:155:217
HS3ST3A1:NM_006042:chr17:-:378:392
HS3ST3A1:NM_006042:chr17:-:541:552
HS3ST3A1:NM_006042:chr17:-:691:759
HS3ST3B1:NM_006041:chr17:+:129:218
HUWE1:NM_031407:chrX:-:376:408
HYAL3:NM_001200030:chr3:-:185:199
IARS:NM_002161:chr9:-:87:101
IBTK:NM_015525:chr6:-:104:163
IBTK:NM_015525:chr6:-:185:196
ICK:NM_014920:chr6:-:230:349
IFNAR1:NM_000629:chr21:+:82:120
IFNAR2:NM_000874:chr21:+:337:342
IFNGR2:NM_005534:chr21:+:559:582
IFRD1:NM_001007245:chr7:+:349:426
IFRD1:NM_001550:chr7:+:59:217
IFT46:NM_001168618:chr11:-:204:224
IFT46:NM_001168618:chr11:-:312:326
IFT80:NM_001190241:chr3:-:326:385
IGSF3:NM_001007237:chr1:-:24:32
IKBKE:NM_001193321:chr1:+:301:366
IKBKE:NM_001193321:chr1:+:378:398
IKBKE:NM_001193321:chr1:+:451:522
IKZF5:NM_022466:chr10:-:110:127
IKZF5:NM_022466:chr10:-:9:131
IL15:NM_000585:chr4:+:147:218
IL1RAP:NM_001167928:chr3:+:341:346
IL20RB:NM_144717:chr3:+:180:239
IL20RB:NM_144717:chr3:+:221:229
IL31RA:NM_001242637:chr5:+:99:119
IL4R:NM_000418:chr16:+:93:119
IL6R:NM_000565:chr1:+:412:423
IL6ST:NM_001190981:chr5:-:219:233
IL7:NM_000880:chr8:-:225:293
INPP4A:NM_001134224:chr2:+:228:254
INTS7:NM_001199809:chr1:-:159:176
IP6K1:NM_001242829:chr3:-:584:589
IPO13:NM_014652:chr1:+:361:375
IQCB1:NM_001023570:chr3:-:109:132
ISCA1:NM_030940:chr9:-:55:69
ITCH:NM_001257137:chr20:+:120:170
ITGB1BP1:NM_004763:chr2:-:170:208
ITPKB:NM_002221:chr1:-:8:58
ITPKB:NM_002221:chr1:-:95:100
ITPR3:NM_002224:chr6:+:163:186
ITSN2:NM_006277:chr2:-:225:239
JAK2:NM_004972:chr9:+:223:228
JAK2:NM_004972:chr9:+:413:418
JARID2:NM_004973:chr6:+:181:186
JAZF1:NM_175061:chr7:-:231:236
JMY:NM_152405:chr5:+:52:72
JOSD1:NM_014876:chr22:-:347:364
JOSD2:NM_001270639:chr19:-:116:121
JOSD2:NM_001270639:chr19:-:197:424
JOSD2:NM_001270640:chr19:-:197:421
JOSD2:NM_001270641:chr19:-:197:442
JUN:NM_002228:chr1:-:1023:1031
KANSL3:NM_001115016:chr2:-:106:126
KAT6A:NM_001099412:chr8:-:476:484
KAT6B:NM_001256468:chr10:+:568:609
KATNB1:NM_005886:chr16:+:125:139
KCNAB2:NM_001199861:chr1:+:521:532
KCNAB2:NM_003636:chr1:+:397:474
KCNMA1:NM_001014797:chr10:-:94:174
KCNMB4:NM_014505:chr12:+:68:205
KCTD15:NM_001129994:chr19:+:178:222
KCTD1:NM_001136205:chr18:-:425:469
KCTD1:NM_001136205:chr18:-:52:63
KDM5A:NM_001042603:chr12:-:257:286
KDM5C:NM_001146702:chrX:-:475:486
KDM6A:NM_021140:chrX:+:138:143
KHDC1:NM_001251874:chr6:-:190:312
KHNYN:NM_015299:chr14:+:31:60
KIAA0195:NM_014738:chr17:+:77:112
KIAA0232:NM_001100590:chr4:+:139:144
KIAA0232:NM_001100590:chr4:+:170:202
KIAA0317:NM_001039479:chr14:-:176:214
KIAA0317:NM_001039479:chr14:-:229:324
KIAA0317:NM_001039479:chr14:-:317:412
KIAA0317:NM_001039479:chr14:-:442:471
KIAA0319L:NM_024874:chr1:-:167:223
KIAA0355:NM_014686:chr19:+:157:228
KIAA0430:NM_001184998:chr16:-:119:124
KIAA0754:NM_015038:chr1:+:115:246
KIAA0947:NM_015325:chr5:+:65:88
KIAA1191:NM_001079684:chr5:-:96:158
KIAA1551:NM_018169:chr12:+:124:153
KIAA1737:NM_033426:chr14:+:137:175
KIAA1841:NM_001129993:chr2:+:157:183
KIAA2018:NM_001009899:chr3:-:70:216
KIF14:NM_014875:chr1:-:344:355
KIF1C:NM_006612:chr17:+:256:333
KIF2A:NM_001098511:chr5:+:303:311
KIF3C:NM_002254:chr2:-:98:190
KIF9:NM_001134878:chr3:-:103:192
KIF9:NM_001134878:chr3:-:255:371
KIF9:NM_001134878:chr3:-:60:128
KIF9:NM_022342:chr3:-:255:356
KIRREL3:NM_001161707:chr11:-:105:161
KIRREL3:NM_001161707:chr11:-:247:315
KLF3:NM_016531:chr4:+:51:56
KLHDC3:NM_057161:chr6:+:278:289
KLHL15:NM_030624:chrX:-:206:226
KLHL7:NM_001031710:chr7:+:190:216
KRCC1:NM_016618:chr2:-:116:130
KRCC1:NM_016618:chr2:-:160:174
KRIT1:NM_004912:chr7:-:328:333
LAMA4:NM_001105206:chr6:-:264:407
LAMA4:NM_001105207:chr6:-:247:327
LATS2:NM_014572:chr13:-:79:222
LCOR:NM_001170765:chr10:+:43:186
LDB2:NM_001130834:chr4:-:266:421
LGR4:NM_018490:chr11:-:118:147
LIMK2:NM_001031801:chr22:+:47:64
LINS:NM_001040616:chr15:-:81:92
LMBRD2:NM_001007527:chr5:-:360:380
LNX2:NM_153371:chr13:-:285:302
LOC100127983:NM_001190972:chr8:-:145:195
LPAR5:NM_001142961:chr12:-:78:89
LPHN2:NM_012302:chr1:+:118:141
LPPR2:NM_001170635:chr19:+:265:348
LRP5:NM_002335:chr11:+:27:41
LRRC16A:NM_001173977:chr6:+:144:149
LRRC28:NM_144598:chr15:+:97:111
LRRC8B:NM_001134476:chr1:+:384:446
LRRFIP2:NM_001134369:chr3:-:301:318
LRRK1:NM_024652:chr15:+:221:274
LSM10:NM_032881:chr1:-:24:80
LTB4R2:NM_001164692:chr14:+:11:16
LURAP1L:NM_203403:chr9:+:31:72
LYSMD4:NM_152449:chr15:-:185:481
LYST:NM_000081:chr1:-:127:135
MAB21L1:NM_005584:chr13:-:111:134
MAML1:NM_014757:chr5:+:155:169
MAML2:NM_032427:chr11:-:22:45
MAP3K11:NM_002419:chr11:-:84:281
MAP3K13:NM_001242314:chr3:+:58:126
MAP3K13:NM_001242317:chr3:+:108:134
MAP3K13:NM_001242317:chr3:+:58:102
MAP3K13:NM_001242317:chr3:+:89:118
MAP3K5:NM_005923:chr6:-:254:268
MAP4K4:NM_001242560:chr2:+:136:141
MAP4K5:NM_006575:chr14:-:234:266
MAPKAP1:NM_001006617:chr9:-:91:120
MARCH4:NM_020814:chr2:-:121:261
MARCH4:NM_020814:chr2:-:393:431
MARCH4:NM_020814:chr2:-:44:187
MARCH8:NM_001002265:chr10:-:575:601
MATR3:NM_199189:chr5:+:441:449
MBD5:NM_018328:chr2:+:73:150
MBD6:NM_052897:chr12:+:180:227
MBOAT1:NM_001080480:chr6:-:198:389
MBTPS1:NM_003791:chr16:-:102:161
MBTPS1:NM_003791:chr16:-:234:269
MCM8:NM_032485:chr20:+:150:194
MCM8:NM_182802:chr20:+:394:399
MCRS1:NM_006337:chr12:-:55:75
MCTP1:NM_001002796:chr5:-:308:352
MCTP1:NM_001002796:chr5:-:334:411
MDM4:NM_001204171:chr1:+:45:62
MED13:NM_005121:chr17:-:29:70
MED16:NM_005481:chr19:-:56:82
MED1:NM_004774:chr17:-:29:82
MEF2A:NM_001130926:chr15:+:196:201
MEF2A:NM_001130926:chr15:+:241:249
MEF2D:NM_001271629:chr1:-:105:113
MEGF9:NM_001080497:chr9:-:31:108
MESDC1:NM_022566:chr15:+:214:267
MESDC1:NM_022566:chr15:+:307:456
MESDC1:NM_022566:chr15:+:665:751
MESDC1:NM_022566:chr15:+:935:1015
MEST:NM_001253901:chr7:+:186:215
METTL13:NM_001007239:chr1:+:158:178
METTL4:NM_022840:chr18:-:194:217
METTL6:NM_152396:chr3:-:173:190
MEX3C:NM_016626:chr18:-:257:271
MFF:NM_020194:chr2:+:22:51
MFHAS1:NM_004225:chr8:-:123:212
MFHAS1:NM_004225:chr8:-:320:403
MGAT2:NM_002408:chr14:+:113:154
MGAT2:NM_002408:chr14:+:88:99
MGAT5:NM_002410:chr2:+:7:51
MICAL2:NM_014632:chr11:+:140:199
MID1:NM_001098624:chrX:-:305:328
MKKS:NM_018848:chr20:-:250:381
MKKS:NM_018848:chr20:-:263:454
MKKS:NM_018848:chr20:-:517:669
MKKS:NM_170784:chr20:-:75:140
MKNK1:NM_001135553:chr1:-:129:140
MLL5:NM_018682:chr7:+:341:358
MLL5:NM_182931:chr7:+:149:373
MLL5:NM_182931:chr7:+:417:506
MLLT10:NM_001195627:chr10:+:298:330
MLLT10:NM_001195628:chr10:+:298:333
MLPH:NM_001042467:chr2:+:122:130
MLST8:NM_001199174:chr16:+:145:153
MMS22L:NM_198468:chr6:-:254:262
MON1B:NM_014940:chr16:+:127:144
MON1B:NM_014940:chr16:+:258:314
MON1B:NM_014940:chr16:+:283:675
MON1B:NM_014940:chr16:+:90:98
MORF4L1:NM_001265603:chr15:+:123:128
MOSPD1:NM_019556:chrX:-:95:112
MPPE1:NM_023075:chr18:-:588:611
MRS2:NM_020662:chr6:+:76:315
MSANTD4:NM_032424:chr11:-:1307:1315
MSL3:NM_078628:chrX:+:97:108
MTF2:NM_001164391:chr1:+:66:101
MTFR1:NM_001145838:chr8:+:15:104
MTFR1:NM_001145838:chr8:+:8:79
MTMR1:NM_003828:chrX:+:8:25
MTMR3:NM_021090:chr22:+:27:44
MUM1:NM_032853:chr19:+:50:58
MYBL1:NM_001080416:chr8:-:391:429
MYL6B:NM_001199629:chr12:+:278:349
MYO10:NM_012334:chr5:-:181:225
MYO19:NM_001033580:chr17:-:810:860
MYO19:NM_001033580:chr17:-:923:976
MYO5C:NM_018728:chr15:-:45:59
MZF1:NM_001267033:chr19:-:279:380
N4BP1:NM_153029:chr16:-:77:85
N4BP2:NM_018177:chr4:+:136:189
NAA16:NM_001110798:chr13:+:199:207
NAA40:NM_024771:chr11:+:92:97
NADK:NM_023018:chr1:-:145:150
NADK:NM_023018:chr1:-:58:96
NALCN:NM_052867:chr13:-:122:181
NARG2:NM_001018089:chr15:-:138:146
NARG2:NM_001018089:chr15:-:46:141
NAT6:NM_001200016:chr3:-:207:230
NAV2:NM_001111019:chr11:+:247:252
NBEAL1:NM_001114132:chr2:+:226:279
NBPF1:NM_017940:chr1:-:113:148
NBPF1:NM_017940:chr1:-:289:396
NBPF1:NM_017940:chr1:-:406:624
NBPF1:NM_017940:chr1:-:56:112
NBPF3:NM_001256416:chr1:+:165:269
NBPF3:NM_001256416:chr1:+:54:65
NCK2:NM_001004722:chr2:+:249:272
NCKAP5L:NM_001037806:chr12:-:53:112
NCOA6:NM_001242539:chr20:-:168:191
NCOA6:NM_001242539:chr20:-:208:249
NCOR1:NM_006311:chr17:-:34:87
NDE1:NM_001143979:chr16:+:788:805
NDST1:NM_001543:chr5:+:125:142
NDST1:NM_001543:chr5:+:148:213
NDST1:NM_001543:chr5:+:261:272
NDST2:NM_003635:chr10:-:250:363
NDUFV1:NM_001166102:chr11:+:112:129
NEK1:NM_001199397:chr4:-:407:448
NF1:NM_000267:chr17:+:67:111
NFATC3:NM_004555:chr16:+:228:242
NFE2L1:NM_003204:chr17:+:312:317
NFIA:NM_001134673:chr1:+:322:327
NGF:NM_002506:chr1:-:69:113
NHLRC2:NM_198514:chr10:+:84:92
NIPAL3:NM_020448:chr1:+:281:292
NLRC5:NM_032206:chr16:+:11:49
NOD1:NM_006092:chr7:-:108:158
NR1H2:NM_001256647:chr19:+:211:273
NR2C2:NM_003298:chr3:+:173:181
NRG1:NM_001160002:chr8:+:164:175
NRG4:NM_138573:chr15:-:41:163
NRIP1:NM_003489:chr21:-:141:152
NRIP1:NM_003489:chr21:-:458:463
NRP2:NM_003872:chr2:+:219:224
NRSN2:NM_024958:chr20:+:417:458
NSMAF:NM_003580:chr8:-:20:31
NT5C2:NM_012229:chr10:-:105:110
NUDT22:NM_001128613:chr11:+:123:143
NXPE3:NM_001134456:chr3:+:478:483
OAZ2:NM_002537:chr15:-:196:237
OCLN:NM_001205254:chr5:+:166:189
ODF2L:NM_001007022:chr1:-:149:154
OPTN:NM_001008211:chr10:+:175:192
OSBPL2:NM_014835:chr20:+:149:160
OSBPL8:NM_001003712:chr12:-:431:445
P2RY2:NM_002564:chr11:+:171:272
P4HA1:NM_000917:chr10:-:211:216
PACRGL:NM_001130727:chr4:+:366:380
PAIP1:NM_006451:chr5:-:133:147
PAK3:NM_002578:chrX:+:291:368
PAK3:NM_002578:chrX:+:402:443
PAPD4:NM_001114394:chr5:+:384:389
PAPOLA:NM_001252006:chr14:+:150:191
PAPOLA:NM_001252006:chr14:+:36:71
PAPOLG:NM_022894:chr2:+:106:120
PARP10:NM_032789:chr8:-:77:85
PARP6:NM_020214:chr15:-:370:423
PARP9:NM_001146102:chr3:-:88:96
PCBP4:NM_001174100:chr3:-:76:87
PCED1A:NM_022760:chr20:-:208:234
PCF11:NM_015885:chr11:+:224:232
PCGF3:NM_006315:chr4:+:195:200
PCGF5:NM_001256549:chr10:+:179:208
PCIF1:NM_022104:chr20:+:30:173
PCNXL2:NM_014801:chr1:-:89:157
PCNXL4:NM_022495:chr14:+:326:502
PCSK7:NM_004716:chr11:-:112:201
PCSK7:NM_004716:chr11:-:71:76
PDE4DIP:NM_001002811:chr1:-:207:260
PDE4DIP:NM_001002811:chr1:-:41:91
PDE4DIP:NM_001198832:chr1:-:262:348
PDE4DIP:NM_022359:chr1:-:220:291
PDE7B:NM_018945:chr6:+:203:322
PDGFA:NM_002607:chr7:-:447:488
PDLIM5:NM_001011513:chr4:+:165:176
PDSS2:NM_020381:chr6:-:22:39
PDZD8:NM_173791:chr10:-:107:217
PDZD8:NM_173791:chr10:-:118:144
PEAK1:NM_024776:chr15:-:152:175
PER1:NM_002616:chr17:-:227:241
PEX2:NM_000318:chr8:-:249:329
PEX2:NM_000318:chr8:-:326:346
PEX2:NM_001079867:chr8:-:249:314
PEX2:NM_001172087:chr8:-:255:392
PHF19:NM_001009936:chr9:-:186:452
PHF20L1:NM_016018:chr8:+:68:94
PHTF2:NM_001127357:chr7:+:97:111
PI4KB:NM_001198773:chr1:-:295:324
PID1:NM_001100818:chr2:-:212:217
PIDD:NM_145886:chr11:-:116:631
PIK3CD:NM_005026:chr1:+:94:198
PIK3R2:NM_005027:chr19:+:113:205
PIK3R2:NM_005027:chr19:+:232:255
PIP4K2A:NM_005028:chr10:-:185:190
PIP4K2B:NM_003559:chr17:-:367:378
PITPNC1:NM_012417:chr17:+:374:388
PKD1:NM_000296:chr16:-:122:145
PKIA:NM_006823:chr8:+:466:474
PKIG:NM_007066:chr20:+:225:248
PKP4:NM_001005476:chr2:+:208:246
PKP4:NM_001005476:chr2:+:44:58
PLEKHA4:NM_001161354:chr19:-:181:213
PLEKHA6:NM_014935:chr1:-:241:273
PLK4:NM_001190799:chr4:+:76:165
PLXNA2:NM_025179:chr1:-:226:237
PLXNA2:NM_025179:chr1:-:682:687
PLXNB1:NM_001130082:chr3:-:62:100
PNLIPRP3:NM_001011709:chr10:+:77:82
PNPLA8:NM_001256007:chr7:-:314:325
PNRC2:NM_017761:chr1:+:227:397
POGK:NM_017542:chr1:+:50:61
POLG:NM_001126131:chr15:-:132:203
POLG:NM_001126131:chr15:-:38:997
POLG:NM_002693:chr15:-:38:1009
POLL:NM_001174084:chr10:-:360:374
POLR1D:NM_015972:chr13:+:147:182
POLR2M:NM_001018102:chr15:+:25:285
POLR2M:NM_015532:chr15:+:25:285
POLR3E:NM_001258033:chr16:+:65:79
POLR3GL:NM_032305:chr1:-:75:86
POLR3H:NM_001018050:chr22:-:195:203
POM121:NM_001257190:chr7:+:614:685
POM121:NM_001257190:chr7:+:61:159
POMGNT1:NM_001243766:chr1:-:613:636
POPDC3:NM_022361:chr6:-:173:199
POPDC3:NM_022361:chr6:-:196:228
POPDC3:NM_022361:chr6:-:216:260
POPDC3:NM_022361:chr6:-:319:342
PPARD:NM_001171818:chr6:+:144:188
PPARD:NM_001171820:chr6:+:185:229
PPDPF:NM_024299:chr20:+:38:55
PPFIBP1:NM_001198915:chr12:+:105:113
PPIP5K1:NM_001130858:chr15:-:138:185
PPP1R15A:NM_014330:chr19:+:128:154
PPP1R15A:NM_014330:chr19:+:162:242
PPP1R15A:NM_014330:chr19:+:63:131
PPP1R15B:NM_032833:chr1:-:126:152
PPP1R15B:NM_032833:chr1:-:174:329
PPP2R5A:NM_006243:chr1:+:387:398
PPP2R5C:NM_002719:chr14:+:85:108
PPP2R5E:NM_006246:chr14:-:263:268
PPP6R3:NM_001164160:chr11:+:159:167
PQLC1:NM_001146343:chr18:-:105:146
PRCC:NM_005973:chr1:+:135:155
PRKD3:NM_005813:chr2:-:186:242
PRMT2:NM_001242864:chr21:+:171:191
PRPF38A:NM_032864:chr1:+:153:158
PRPF38B:NM_018061:chr1:+:188:196
PRPF39:NM_017922:chr14:+:124:162
PRPS1:NM_001204402:chrX:+:94:105
PRR14:NM_024031:chr16:+:105:191
PRR7:NM_001174101:chr5:+:213:371
PRRC1:NM_130809:chr5:+:85:90
PRRC2B:NM_013318:chr9:+:39:128
PRRC2C:NM_015172:chr1:+:250:336
PRSS12:NM_003619:chr4:-:19:111
PSEN2:NM_000447:chr1:+:256:261
PTEN:NM_000314:chr10:+:213:227
PTP4A1:NM_003463:chr6:+:539:673
PTP4A1:NM_003463:chr6:+:666:800
PTP4A2:NM_001195100:chr1:-:30:95
PTP4A2:NM_080391:chr1:-:377:496
PTPN11:NM_002834:chr12:+:312:317
PTPN14:NM_005401:chr1:-:489:494
PTPN4:NM_002830:chr2:+:582:650
PTPRG:NM_002841:chr3:+:24:101
PTPRG:NM_002841:chr3:+:703:843
PTPRS:NM_002850:chr19:-:92:97
QRSL1:NM_018292:chr6:+:26:43
R3HCC1:NM_001136108:chr8:+:96:230
R3HDM1:NM_015361:chr2:+:134:187
R3HDM1:NM_015361:chr2:+:17:115
RAB10:NM_016131:chr2:+:305:310
RAB11FIP2:NM_014904:chr10:-:356:364
RAB11FIP3:NM_014700:chr16:+:123:164
RAB24:NM_001031677:chr5:-:140:151
RAB27A:NM_004580:chr15:-:137:142
RAB28:NM_001017979:chr4:-:49:66
RAB3IP:NM_022456:chr12:+:134:139
RAD23A:NM_001270362:chr19:+:69:83
RAD51D:NM_001142571:chr17:-:205:216
RAD54L:NM_001142548:chr1:+:79:90
RALBP1:NM_006788:chr18:+:165:176
RALGPS2:NM_152663:chr1:+:260:283
RAPGEF6:NM_001164386:chr5:-:151:174
RARG:NM_000966:chr12:-:317:322
RARG:NM_001042728:chr12:-:180:203
RASSF8:NM_001164746:chr12:+:490:498
RBBP8:NM_002894:chr18:+:271:276
RBCK1:NM_006462:chr20:+:22:39
RBM18:NM_033117:chr9:-:118:126
RBM42:NM_024321:chr19:+:44:49
RBMXL1:NM_001162536:chr1:-:540:581
RC3H2:NM_001100588:chr9:-:200:211
RCBTB1:NM_018191:chr13:-:222:239
RELA:NM_001145138:chr11:-:73:87
RELL2:NM_001130029:chr5:+:697:867
RELL2:NM_001130029:chr5:+:91:333
REPIN1:NM_001099695:chr7:+:113:184
REPIN1:NM_001099696:chr7:+:113:280
REV3L:NM_002912:chr6:-:7:138
RFC1:NM_001204747:chr4:-:62:82
RFX5:NM_000449:chr1:-:125:181
RGS17:NM_012419:chr6:-:39:62
RHNO1:NM_001252499:chr12:+:86:313
RHNO1:NM_001252500:chr12:+:86:304
RHNO1:NM_001257097:chr12:+:120:434
RHOQ:NM_012249:chr2:+:293:343
RNF10:NM_014868:chr12:+:360:371
RNF10:NM_014868:chr12:+:368:628
RNF11:NM_014372:chr1:+:54:158
RNF141:NM_016422:chr11:-:90:98
RNF14:NM_001201365:chr5:+:68:85
RNF213:NM_001256071:chr17:+:45:89
RNF216:NM_207111:chr7:-:213:227
RNF26:NM_032015:chr11:+:34:78
RNF38:NM_194328:chr9:-:108:128
RNF41:NM_001242826:chr12:-:150:191
RNF43:NM_017763:chr17:-:170:289
RNF43:NM_017763:chr17:-:355:447
ROCK1:NM_005406:chr18:-:325:336
ROS1:NM_002944:chr6:-:27:137
RPL3:NM_000967:chr22:-:60:68
RPTOR:NM_001163034:chr17:+:250:309
RSPH3:NM_031924:chr6:-:110:193
RSRC1:NM_016625:chr3:+:95:100
RTEL1:NM_016434:chr20:+:707:781
RUNX1:NM_001001890:chr21:-:561:566
RWDD2B:NM_016940:chr21:-:60:74
SAMD12:NM_001101676:chr8:-:101:124
SAMD4B:NM_018028:chr19:+:868:873
SAT1:NM_002970:chrX:+:120:209
SAT1:NM_002970:chrX:+:77:91
SAV1:NM_021818:chr14:-:27:32
SAV1:NM_021818:chr14:-:82:204
SBF2:NM_030962:chr11:-:11:61
SCAF11:NM_004719:chr12:-:177:203
SCAP:NM_012235:chr3:-:167:208
SCAP:NM_012235:chr3:-:212:268
SCAP:NM_012235:chr3:-:228:242
SCLT1:NM_144643:chr4:-:357:371
SCMH1:NM_001172218:chr1:-:35:55
SCN9A:NM_002977:chr2:-:247:303
SDF4:NM_016176:chr1:-:90:104
SEC24C:NM_004922:chr10:+:169:180
SEC24D:NM_014822:chr4:-:253:261
SENP1:NM_001267594:chr12:-:308:313
SENP5:NM_152699:chr3:+:236:304
SEPHS2:NM_012248:chr16:-:42:56
SEPW1:NM_003009:chr19:+:183:239
SERTAD2:NM_014755:chr2:-:116:154
SETD5:NM_001080517:chr3:+:164:184
SETD5:NM_001080517:chr3:+:284:316
SETD5:NM_001080517:chr3:+:327:407
SETD5:NM_001080517:chr3:+:338:394
SETDB2:NM_031915:chr13:+:38:58
SFSWAP:NM_001261411:chr12:+:18:65
SGMS1:NM_147156:chr10:-:744:752
SGSM3:NM_015705:chr22:+:103:159
SH2B1:NM_001145795:chr16:+:183:275
SH2B3:NM_005475:chr12:+:138:182
SH2B3:NM_005475:chr12:+:295:360
SH2B3:NM_005475:chr12:+:67:141
SH2D3A:NM_005490:chr19:-:126:149
SH3D19:NM_001009555:chr4:-:719:739
SH3RF1:NM_020870:chr4:-:253:267
SH3RF2:NM_152550:chr5:+:123:236
SHC1:NM_001130040:chr1:-:27:53
SHC1:NM_001130041:chr1:-:170:184
SHC1:NM_001130041:chr1:-:225:242
SIN3A:NM_001145357:chr15:-:171:185
SIPA1L1:NM_015556:chr14:+:30:110
SIPA1L3:NM_015073:chr19:+:131:145
SIPA1L3:NM_015073:chr19:+:200:271
SIX5:NM_175875:chr19:-:90:110
SKIL:NM_001145097:chr3:+:307:327
SKIL:NM_001145097:chr3:+:92:109
SKP2:NM_001243120:chr5:+:75:89
SLC16A14:NM_152527:chr2:-:323:418
SLC16A4:NM_001201546:chr1:-:100:123
SLC16A5:NM_004695:chr17:+:106:405
SLC16A7:NM_001270622:chr12:+:211:216
SLC22A5:NM_003060:chr5:+:81:86
SLC23A2:NM_005116:chr20:-:162:167
SLC25A30:NM_001010875:chr13:-:102:113
SLC25A51:NM_033412:chr9:-:282:338
SLC2A9:NM_020041:chr4:-:3:35
SLC30A5:NM_001251969:chr5:+:208:219
SLC30A5:NM_001251969:chr5:+:78:122
SLC30A9:NM_006345:chr4:+:61:126
SLC35A4:NM_080670:chr5:+:9:320
SLC35B4:NM_032826:chr7:-:75:80
SLC35C2:NM_015945:chr20:-:68:73
SLC35C2:NM_015945:chr20:-:93:131
SLC35F5:NM_025181:chr2:-:333:359
SLC36A1:NM_078483:chr5:+:36:50
SLC37A3:NM_032295:chr7:-:105:113
SLC38A1:NM_001077484:chr12:-:364:369
SLC39A3:NM_144564:chr19:-:147:179
SLC39A6:NM_001099406:chr18:-:144:173
SLC41A1:NM_173854:chr1:-:43:48
SLC4A2:NM_001199692:chr7:+:980:1030
SLC5A3:NM_006933:chr21:+:131:199
SLC6A8:NM_001142805:chrX:+:45:92
SLC6A9:NM_001024845:chr1:-:184:207
SLX4:NM_032444:chr16:-:504:614
SLX4:NM_032444:chr16:-:61:153
SMAD6:NM_005585:chr15:+:322:465
SMAD6:NM_005585:chr15:+:345:461
SMAD6:NM_005585:chr15:+:547:570
SMAD7:NM_001190821:chr18:-:172:249
SMAD7:NM_001190821:chr18:-:219:563
SMCR7L:NM_019008:chr22:+:187:399
SMCR8:NM_144775:chr17:+:26:43
SMEK1:NM_032560:chr14:-:16:39
SMEK2:NM_001122964:chr2:-:71:85
SMPD1:NM_000543:chr11:+:168:173
SMTN:NM_006932:chr22:+:149:157
SMUG1:NM_001243787:chr12:-:139:273
SMUG1:NM_001243788:chr12:-:27:47
SNRK:NM_017719:chr3:+:212:235
SNRNP25:NM_024571:chr16:+:123:260
SOCS4:NM_080867:chr14:+:287:409
SOCS6:NM_004232:chr18:+:193:213
SOLH:NM_005632:chr16:+:240:257
SPAG5:NM_006461:chr17:-:40:69
SPATA18:NM_145263:chr4:+:8:64
SPATA2:NM_001135773:chr20:-:274:330
SPATC1L:NM_001142854:chr21:-:37:66
SPHK2:NM_001204158:chr19:+:153:278
SPIN1:NM_006717:chr9:+:208:219
SPINK6:NM_001195290:chr5:+:52:57
SPRED2:NM_181784:chr2:-:451:456
SPRED2:NM_181784:chr2:-:482:526
SPRED2:NM_181784:chr2:-:7:15
SPRY2:NM_005842:chr13:-:338:439
SPRY2:NM_005842:chr13:-:351:362
SRCAP:NM_006662:chr16:+:269:457
SRD5A1:NM_001047:chr5:+:138:569
SRF:NM_003131:chr6:+:385:396
SRF:NM_003131:chr6:+:409:444
SRPX2:NM_014467:chrX:+:175:189
ST3GAL2:NM_006927:chr16:-:109:138
ST3GAL2:NM_006927:chr16:-:721:888
ST3GAL3:NM_001270459:chr1:+:17:169
ST3GAL4:NM_001254757:chr11:+:217:252
ST5:NM_213618:chr11:-:128:241
ST6GAL1:NM_173216:chr3:+:373:387
ST6GALNAC5:NM_030965:chr1:+:103:147
STAG1:NM_005862:chr3:-:50:61
STAT6:NM_001178078:chr12:-:229:252
STK16:NM_001008910:chr2:+:54:137
STPG1:NM_001199012:chr1:-:201:209
STRADA:NM_001003786:chr17:-:246:254
STRADB:NM_001206864:chr2:+:325:360
STX16:NM_001001433:chr20:+:40:66
SUPT7L:NM_014860:chr2:-:293:307
SV2A:NM_014849:chr1:-:455:472
SVIL:NM_021738:chr10:-:47:196
SYTL2:NM_206929:chr11:-:114:182
TAB3:NM_152787:chrX:-:425:430
TAB3:NM_152787:chrX:-:505:516
TAF12:NM_001135218:chr1:-:77:88
TAF1C:NM_001243157:chr16:-:85:501
TAF1C:NM_001243158:chr16:-:85:186
TAF1C:NM_001243160:chr16:-:85:363
TAF9:NM_001015892:chr5:-:338:454
TAF9:NM_003187:chr5:-:92:217
TAOK3:NM_016281:chr12:-:359:409
TASP1:NM_017714:chr20:-:101:187
TASP1:NM_017714:chr20:-:72:107
TASP1:NM_017714:chr20:-:80:97
TATDN2:NM_014760:chr3:+:292:306
TAX1BP1:NM_001079864:chr7:+:112:141
TBC1D14:NM_020773:chr4:+:158:178
TBC1D16:NM_019020:chr17:-:87:170
TBC1D22B:NM_017772:chr6:+:9:38
TBC1D4:NM_014832:chr13:-:95:106
TBRG1:NM_032811:chr11:+:197:241
TBX3:NM_005996:chr12:-:238:246
TBXA2R:NM_001060:chr19:-:220:351
TCAIM:NM_001029839:chr3:+:272:442
TCAIM:NM_001029840:chr3:+:207:260
TCEAL4:NM_001006935:chrX:+:36:41
TCF12:NM_003205:chr15:+:47:58
TCN2:NM_000355:chr22:+:116:127
TEAD1:NM_021961:chr11:+:190:198
TECPR1:NM_015395:chr7:-:133:228
TESK1:NM_006285:chr9:+:265:309
TEX2:NM_018469:chr17:-:103:132
TFAP2C:NM_003222:chr20:+:91:105
TFDP2:NM_001178138:chr3:-:417:440
TFE3:NM_006521:chrX:-:121:129
TGFBR3:NM_001195683:chr1:-:273:281
THAP7:NM_001008695:chr22:-:19:282
THAP7:NM_030573:chr22:-:19:33
TIA1:NM_022037:chr2:-:132:137
TICAM1:NM_182919:chr19:-:131:166
TIMM21:NM_014177:chr18:+:30:47
TIRAP:NM_001039661:chr11:+:186:230
TIRAP:NM_001039661:chr11:+:326:490
TJAP1:NM_001146016:chr6:+:72:83
TJP1:NM_003257:chr15:-:382:405
TLE3:NM_001105192:chr15:-:377:406
TLE4:NM_007005:chr9:+:233:241
TLL1:NM_001204760:chr4:+:498:515
TMEM106C:NM_001143841:chr12:+:90:176
TMEM115:NM_007024:chr3:-:122:142
TMEM116:NM_001193453:chr12:-:144:263
TMEM132A:NM_017870:chr11:+:132:158
TMEM134:NM_001078650:chr11:-:48:71
TMEM138:NM_016464:chr11:+:386:397
TMEM158:NM_015444:chr3:-:249:278
TMEM177:NM_001105198:chr2:+:32:37
TMEM180:NM_024789:chr10:+:152:202
TMEM184B:NM_001195072:chr22:-:138:149
TMEM184C:NM_018241:chr4:+:236:271
TMEM204:NM_001256541:chr16:+:47:223
TMEM204:NM_024600:chr16:+:271:444
TMEM218:NM_001080546:chr11:-:265:279
TMEM218:NM_001258238:chr11:-:222:515
TMEM218:NM_001258247:chr11:-:213:491
TMEM5:NM_014254:chr12:+:75:86
TMEM63B:NM_018426:chr6:+:47:58
TMEM98:NM_001033504:chr17:+:337:351
TMEM99:NM_001195386:chr17:+:201:266
TMEM99:NM_001195386:chr17:+:95:145
TMF1:NM_007114:chr3:-:121:135
TMTC4:NM_032813:chr13:-:190:210
TNFAIP1:NM_021137:chr17:+:229:234
TNFAIP2:NM_006291:chr14:+:8:43
TNFRSF10B:NM_003842:chr8:-:226:243
TNFRSF1A:NM_001065:chr12:-:272:283
TNFRSF21:NM_014452:chr6:-:305:322
TNFRSF6B:NM_003823:chr20:+:49:87
TNKS1BP1:NM_033396:chr11:-:160:165
TNRC6B:NM_001162501:chr22:+:65:94
TNS3:NM_022748:chr7:-:198:236
TOR1AIP2:NM_001199260:chr1:-:251:256
TOR1AIP2:NM_001199260:chr1:-:571:606
TOR4A:NM_017723:chr9:+:94:183
TPRKB:NM_016058:chr2:-:86:91
TPST2:NM_001008566:chr22:-:234:290
TRAK2:NM_015049:chr2:-:231:308
TRAK2:NM_015049:chr2:-:250:279
TRAK2:NM_015049:chr2:-:88:99
TRAPPC6B:NM_001079537:chr14:-:223:234
TRERF1:NM_033502:chr6:-:226:240
TRERF1:NM_033502:chr6:-:84:164
TRIM16L:NM_001037330:chr17:+:203:307
TRIM16L:NM_001037330:chr17:+:68:172
TRIM37:NM_001005207:chr17:-:254:271
TRIM41:NM_033549:chr5:+:76:246
TRIM56:NM_030961:chr7:+:118:171
TRIM5:NM_033034:chr11:-:246:251
TRIM7:NM_033342:chr5:-:10:15
TRMT12:NM_017956:chr8:+:28:39
TROAP:NM_001100620:chr12:+:133:147
TRPM7:NM_017672:chr15:-:98:487
TSC1:NM_000368:chr9:-:28:60
TSC22D1:NM_006022:chr13:-:133:156
TSC22D1:NM_006022:chr13:-:201:233
TSC22D1:NM_006022:chr13:-:276:299
TSC22D4:NM_030935:chr7:-:321:371
TSC22D4:NM_030935:chr7:-:623:694
TSGA10:NM_182911:chr2:-:234:563
TSHZ1:NM_005786:chr18:+:326:340
TSHZ1:NM_005786:chr18:+:74:94
TSTD3:NM_001195131:chr6:+:81:197
TTBK2:NM_173500:chr15:-:52:180
TTC23:NM_001040655:chr15:-:91:126
TTC7A:NM_020458:chr2:+:348:401
TTI1:NM_014657:chr20:-:176:190
TTLL4:NM_014640:chr2:+:289:357
TTLL5:NM_015072:chr14:+:163:174
TTLL5:NM_015072:chr14:+:171:251
TTLL5:NM_015072:chr14:+:256:330
TUBA1A:NM_001270399:chr12:-:279:284
TUBG2:NM_016437:chr17:+:210:392
TULP4:NM_001007466:chr6:+:305:361
TUSC2:NM_007275:chr3:-:72:95
TYK2:NM_003331:chr19:-:186:212
UBASH3B:NM_032873:chr11:+:342:356
UBE2Q2:NM_173469:chr15:+:375:416
UBE3B:NM_001270449:chr12:+:28:87
UBE4A:NM_001204077:chr11:+:113:133
UBE4B:NM_001105562:chr1:+:555:566
UBL3:NM_007106:chr13:-:105:116
UBOX5:NM_001267584:chr20:-:155:250
UBQLN1:NM_013438:chr9:-:323:334
UCK2:NM_012474:chr1:+:117:122
UCP2:NM_003355:chr11:-:134:244
UHMK1:NM_144624:chr1:+:44:55
ULK2:NM_001142610:chr17:-:140:208
UPRT:NM_145052:chrX:+:83:91
URI1:NM_003796:chr19:+:118:129
USB1:NM_001195302:chr16:+:101:160
USF1:NM_007122:chr1:-:126:131
USP10:NM_005153:chr16:+:75:101
USP12:NM_182488:chr13:-:243:269
USP16:NM_001001992:chr21:+:162:185
USP20:NM_001008563:chr9:+:188:235
USP21:NM_001014443:chr1:+:60:164
USP36:NM_025090:chr17:-:275:286
USP38:NM_032557:chr4:+:123:140
USP38:NM_032557:chr4:+:362:382
USP53:NM_019050:chr4:+:206:238
USP53:NM_019050:chr4:+:400:426
USP6NL:NM_014688:chr10:-:113:136
USPL1:NM_005800:chr13:+:396:413
UST:NM_005715:chr6:+:124:144
UVRAG:NM_003369:chr11:+:49:63
VAC14:NM_018052:chr16:-:12:29
VCAN:NM_001126336:chr5:+:264:269
VEPH1:NM_001167911:chr3:-:80:109
VEZT:NM_017599:chr12:+:92:121
VPS13D:NM_015378:chr1:+:79:102
VPS4A:NM_013245:chr16:+:123:131
VPS8:NM_001009921:chr3:+:67:111
VRK3:NM_001025778:chr19:-:294:314
WAPAL:NM_015045:chr10:-:43:87
WASF1:NM_001024934:chr6:-:527:541
WASF2:NM_001201404:chr1:-:22:69
WASF3:NM_006646:chr13:+:69:122
WDR24:NM_032259:chr16:-:418:486
WDR27:NM_001202550:chr6:-:357:473
WDR33:NM_001006622:chr2:-:47:79
WDR47:NM_001142550:chr1:-:202:210
WDR53:NM_182627:chr3:-:103:108
WDR53:NM_182627:chr3:-:212:220
WDTC1:NM_015023:chr1:+:292:306
WHAMM:NM_001080435:chr15:+:417:485
WHSC1:NM_001042424:chr4:+:131:154
WHSC1:NM_007331:chr4:+:464:472
WHSC1:NM_133335:chr4:+:109:117
WNK1:NM_001184985:chr12:+:21:35
WWP1:NM_007013:chr8:+:67:93
WWTR1:NM_001168280:chr3:-:85:90
XPO6:NM_001270940:chr16:-:32:40
XPO6:NM_001270940:chr16:-:343:369
XPO6:NM_001270940:chr16:-:473:481
XPOT:NM_007235:chr12:+:286:297
XPOT:NM_007235:chr12:+:415:423
YEATS2:NM_018023:chr3:+:175:186
YTHDF1:NM_017798:chr20:-:287:340
ZAK:NM_016653:chr2:+:36:50
ZBED4:NM_014838:chr22:+:70:144
ZBED5:NM_001143667:chr11:-:56:70
ZBTB38:NM_001080412:chr3:+:281:286
ZBTB43:NM_001135776:chr9:+:103:108
ZBTB4:NM_001128833:chr17:-:222:314
ZBTB4:NM_020899:chr17:-:226:390
ZBTB7B:NM_001252406:chr1:+:269:274
ZC3H10:NM_032786:chr12:+:85:126
ZC3H11A:NM_014827:chr1:+:327:353
ZC3H7A:NM_014153:chr16:-:136:147
ZC3H7B:NM_017590:chr22:+:79:102
ZCCHC11:NM_001009881:chr1:-:17:34
ZCCHC17:NM_016505:chr1:+:111:125
ZDHHC1:NM_013304:chr16:-:101:166
ZDHHC2:NM_016353:chr8:+:243:254
ZDHHC3:NM_001135179:chr3:-:250:270
ZDHHC3:NM_001135179:chr3:-:65:277
ZDHHC4:NM_001134387:chr7:+:312:419
ZDHHC5:NM_015457:chr11:+:369:434
ZDHHC6:NM_022494:chr10:-:110:151
ZDHHC6:NM_022494:chr10:-:175:288
ZDHHC8:NM_001185024:chr22:+:85:339
ZER1:NM_006336:chr9:-:354:365
ZFP64:NM_018197:chr20:-:287:292
ZFYVE20:NM_022340:chr3:-:16:42
ZFYVE20:NM_022340:chr3:-:403:426
ZFYVE26:NM_015346:chr14:-:13:99
ZHX1-C8ORF76:NM_001204180:chr8:-:191:202
ZHX1-C8ORF76:NM_001204180:chr8:-:229:249
ZHX1-C8ORF76:NM_001204180:chr8:-:305:316
ZHX3:NM_015035:chr20:-:160:165
ZNF121:NM_001008727:chr19:-:155:166
ZNF146:NM_001099638:chr19:+:600:614
ZNF146:NM_001099638:chr19:+:682:696
ZNF146:NM_001099638:chr19:+:878:895
ZNF17:NM_006959:chr19:+:24:74
ZNF213:NM_001134655:chr16:+:327:368
ZNF219:NM_016423:chr14:-:122:364
ZNF227:NM_182490:chr19:+:68:121
ZNF248:NM_001267597:chr10:-:138:329
ZNF248:NM_001267605:chr10:-:312:395
ZNF260:NM_001012756:chr19:-:291:311
ZNF280D:NM_017661:chr15:-:151:186
ZNF286A:NM_020652:chr17:+:194:250
ZNF30:NM_001099437:chr19:+:78:83
ZNF317:NM_001190791:chr19:+:221:250
ZNF322:NM_001242798:chr6:-:393:419
ZNF329:NM_024620:chr19:-:7:111
ZNF32:NM_001005368:chr10:-:137:271
ZNF335:NM_022095:chr20:-:18:77
ZNF33A:NM_006954:chr10:+:104:181
ZNF33B:NM_006955:chr10:-:41:118
ZNF347:NM_001172674:chr19:-:68:76
ZNF35:NM_003420:chr3:+:159:224
ZNF37A:NM_001007094:chr10:+:70:105
ZNF394:NM_032164:chr7:-:88:198
ZNF410:NM_001242924:chr14:+:365:397
ZNF420:NM_144689:chr19:+:108:209
ZNF428:NM_182498:chr19:-:329:337
ZNF430:NM_001172671:chr19:+:134:178
ZNF438:NM_001143766:chr10:-:135:224
ZNF45:NM_003425:chr19:-:153:254
ZNF45:NM_003425:chr19:-:358:495
ZNF468:NM_001008801:chr19:-:54:83
ZNF524:NM_153219:chr19:+:34:348
ZNF526:NM_133444:chr19:+:80:118
ZNF544:NM_014480:chr19:+:261:359
ZNF544:NM_014480:chr19:+:343:384
ZNF547:NM_173631:chr19:+:26:205
ZNF547:NM_173631:chr19:+:90:233
ZNF562:NM_001130031:chr19:-:114:146
ZNF562:NM_001130031:chr19:-:37:54
ZNF569:NM_152484:chr19:-:477:506
ZNF585A:NM_152655:chr19:-:176:241
ZNF585B:NM_152279:chr19:-:197:223
ZNF595:NM_182524:chr4:+:89:124
ZNF599:NM_001007248:chr19:-:156:290
ZNF611:NM_001161499:chr19:-:75:128
ZNF614:NM_025040:chr19:-:334:405
ZNF621:NM_198484:chr3:+:226:396
ZNF638:NM_001014972:chr2:+:89:106
ZNF639:NM_016331:chr3:+:118:126
ZNF655:NM_001009958:chr7:+:195:293
ZNF655:NM_001083956:chr7:+:322:333
ZNF664-FAM101A:NM_001204299:chr12:+:182:244
ZNF664:NM_001204298:chr12:+:386:400
ZNF664:NM_001204298:chr12:+:490:501
ZNF668:NM_024706:chr16:-:225:242
ZNF672:NM_024836:chr1:+:256:276
ZNF672:NM_024836:chr1:+:327:362
ZNF672:NM_024836:chr1:+:362:613
ZNF682:NM_033196:chr19:-:73:81
ZNF714:NM_182515:chr19:+:199:273
ZNF71:NM_021216:chr19:+:185:241
ZNF747:NM_023931:chr16:-:47:88
ZNF749:NM_001023561:chr19:+:32:43
ZNF74:NM_001256523:chr22:+:170:262
ZNF74:NM_001256524:chr22:+:77:352
ZNF74:NM_001256525:chr22:+:170:808
ZNF780A:NM_001010880:chr19:-:145:171
ZNF790:NM_001242801:chr19:-:189:335
ZNF791:NM_153358:chr19:+:111:122
ZNF800:NM_176814:chr7:-:664:684
ZNF821:NM_001201552:chr16:-:190:486
ZNF821:NM_001201553:chr16:-:247:471
ZNF821:NM_001201554:chr16:-:190:561
ZNF821:NM_017530:chr16:-:247:546
ZNF83:NM_001105549:chr19:-:106:177
ZNF83:NM_001105549:chr19:-:153:320
ZNF83:NM_001105549:chr19:-:385:684
ZNF83:NM_001105549:chr19:-:53:85
ZNF83:NM_001105550:chr19:-:153:470
ZNF83:NM_001105550:chr19:-:470:568
ZNF83:NM_001105551:chr19:-:153:431
ZNF83:NM_001105552:chr19:-:153:470
ZNF83:NM_001105553:chr19:-:153:314
ZNF83:NM_001105554:chr19:-:106:180
ZNF83:NM_001242531:chr19:-:151:174
ZNF83:NM_001242531:chr19:-:210:497
ZNF83:NM_001242538:chr19:-:210:575
ZNF860:NM_001137674:chr3:+:7:237
ZNRF1:NM_032268:chr16:+:421:444
ZZZ3:NM_015534:chr1:-:133:144
ZZZ3:NM_015534:chr1:-:402:461

## Sheet: high.dORF
A1BG:NM_130786:chr19:-:1549:1689
AFMID:NM_001010982:chr17:+:968:1039
ARMCX6:NM_001009584:chrX:-:1125:1289
C11orf48:NM_024099:chr11:-:607:1086
C16orf74:NM_206967:chr16:-:673:876
C17orf89:NM_001086521:chr17:+:311:328
C19orf24:NM_017914:chr19:+:424:723
C19orf24:NM_017914:chr19:+:680:859
CCDC88B:NM_032251:chr11:+:4645:4770
EIF1:NM_005801:chr17:+:510:530
EIF1:NM_005801:chr17:+:548:607
EIF1:NM_005801:chr17:+:607:612
F12:NM_000505:chr5:-:1457:2038
FHL3:NM_001243878:chr1:-:856:1050
HIST1H2AI:NM_003509:chr6:+:408:416
HRCT1:NM_001039792:chr9:+:493:567
IRS1:NM_005544:chr2:-:3737:3814
ITGAE:NM_002208:chr17:-:3737:3760
KRT10:NM_000421:chr17:-:1845:1880
KRT10:NM_000421:chr17:-:1930:1995
KRT10:NM_000421:chr17:-:2003:2068
KRT10:NM_000421:chr17:-:2068:2130
LDOC1:NM_012317:chrX:-:948:1103
PHLDA2:NM_003311:chr11:-:511:639
POLM:NM_013284:chr7:-:1653:1805
PSCA:NM_005672:chr8:+:555:839
RGS14:NM_006480:chr5:+:1879:1971
SYT15:NM_181519:chr10:-:1326:1496
TMC5:NM_001105248:chr16:+:4440:4508
TMEM107:NM_032354:chr17:-:1219:1239
TRNP1:NM_001013642:chr1:+:843:998
TROAP:NM_001100620:chr12:+:585:623
UBL4A:NM_014235:chrX:-:1033:1038
ZFPM1:NM_153813:chr16:+:3097:3216
