# Supplementary figures and images for: Many lncRNAs, 5’UTRs, and pseudogenes are translated and some are likely to express functional proteins
Source: eLife journal article supplement (doi:10.7554/elife.08890), 2015-12-19

# Figure 7-figure supplement 1

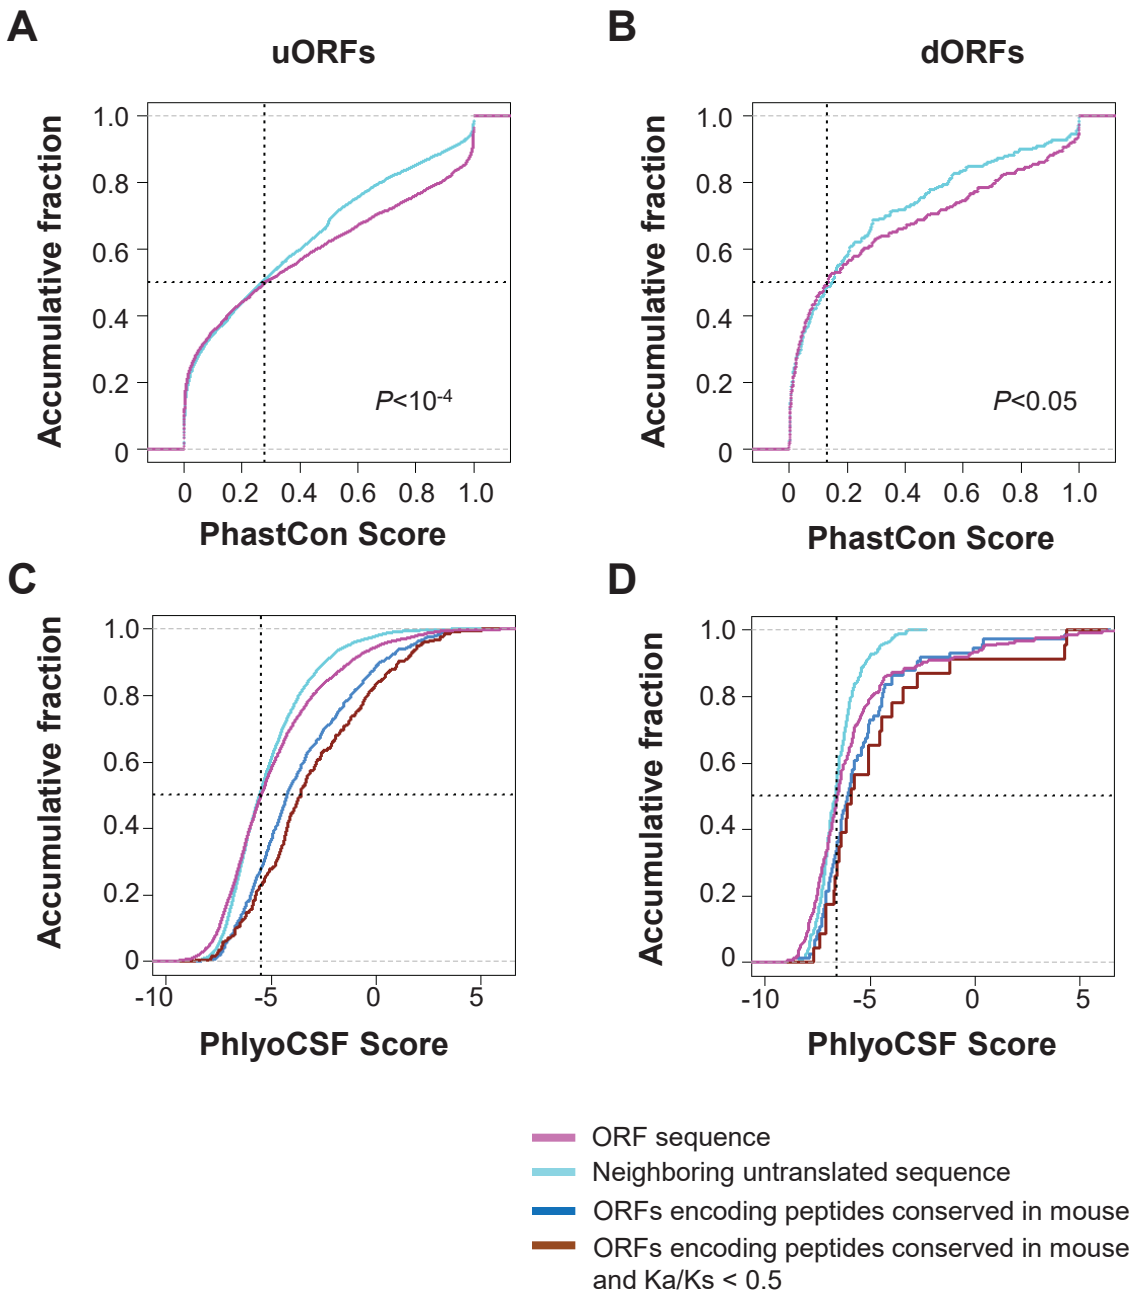

Supplement: supp [file elife-08890-supp-v1.zip › elife_poa_e08890_Figure_7_figure_supplement_1.pdf]

# Figure 1-figure supplement 1

**A**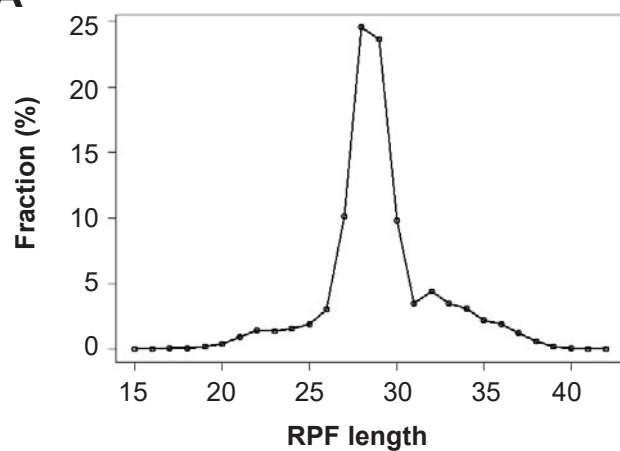**B**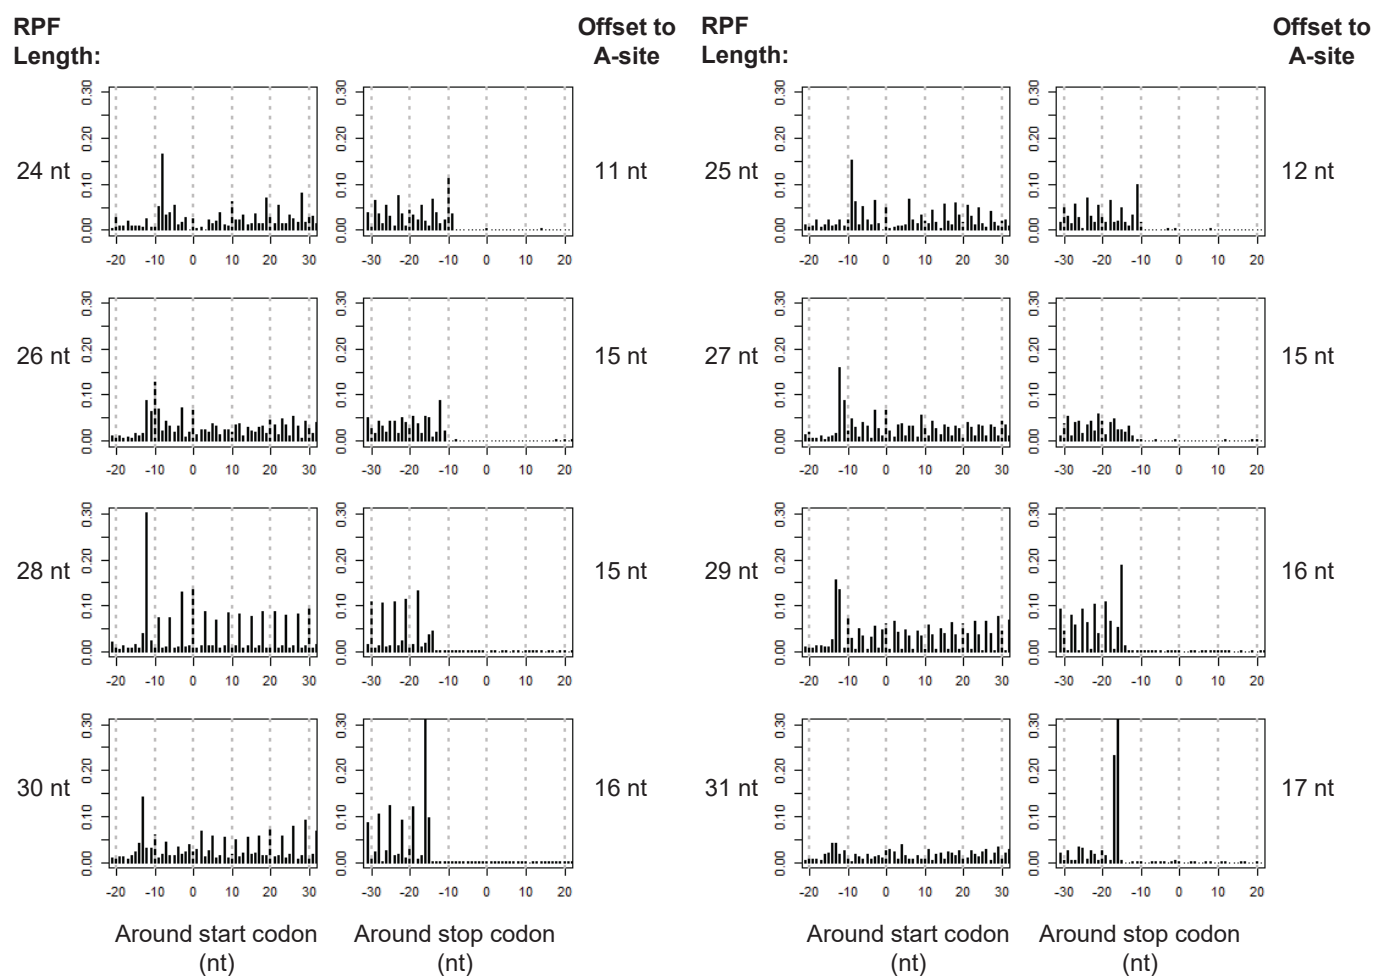

Supplement: supp [file elife-08890-supp-v1.zip › elife_poa_e08890_Figure_1_figures_supplement_1.pdf]

# Figure 4-figure supplement 1

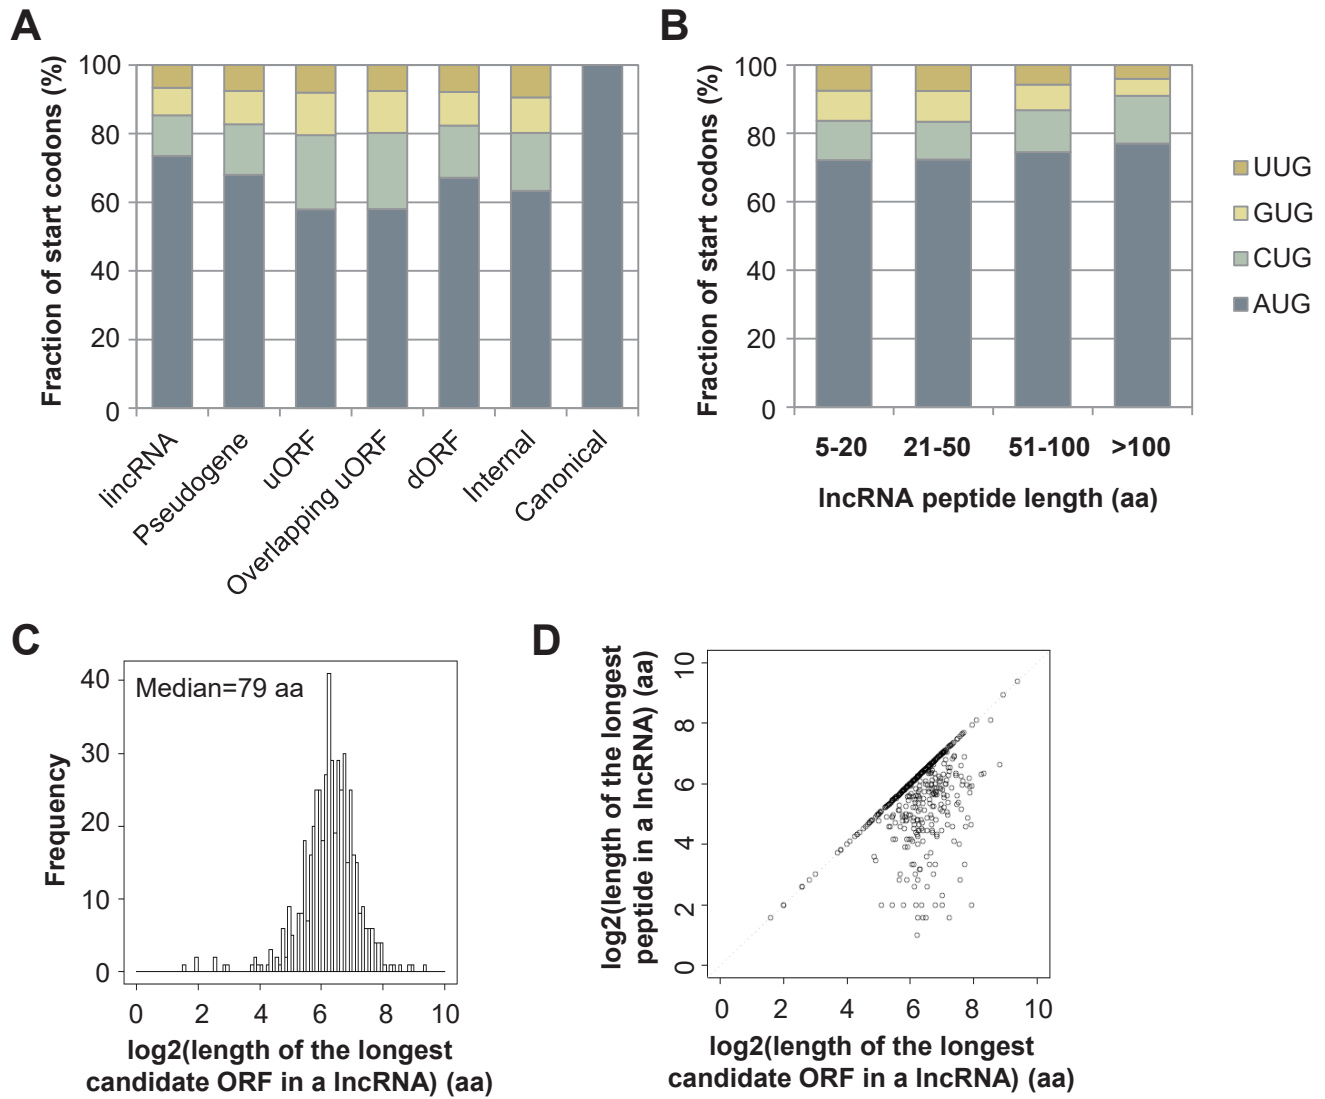

Supplement: supp [file elife-08890-supp-v1.zip › elife_poa_e08890_Figure_4_figure_supplement_1.pdf]

Figure 6-figure supplement 1

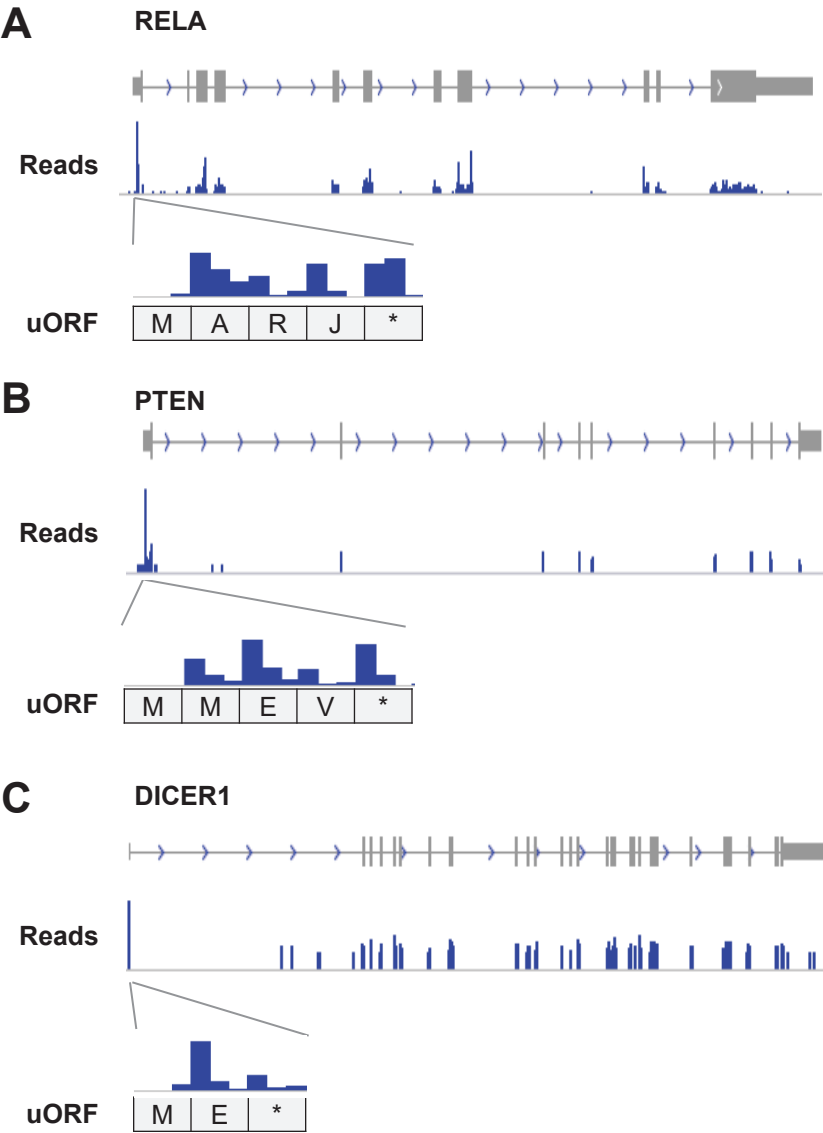

Supplement: supp [file elife-08890-supp-v1.zip › elife_poa_e08890_Figure_6_figure_supplement_1.pdf]

# Figure 4-figure supplement 5

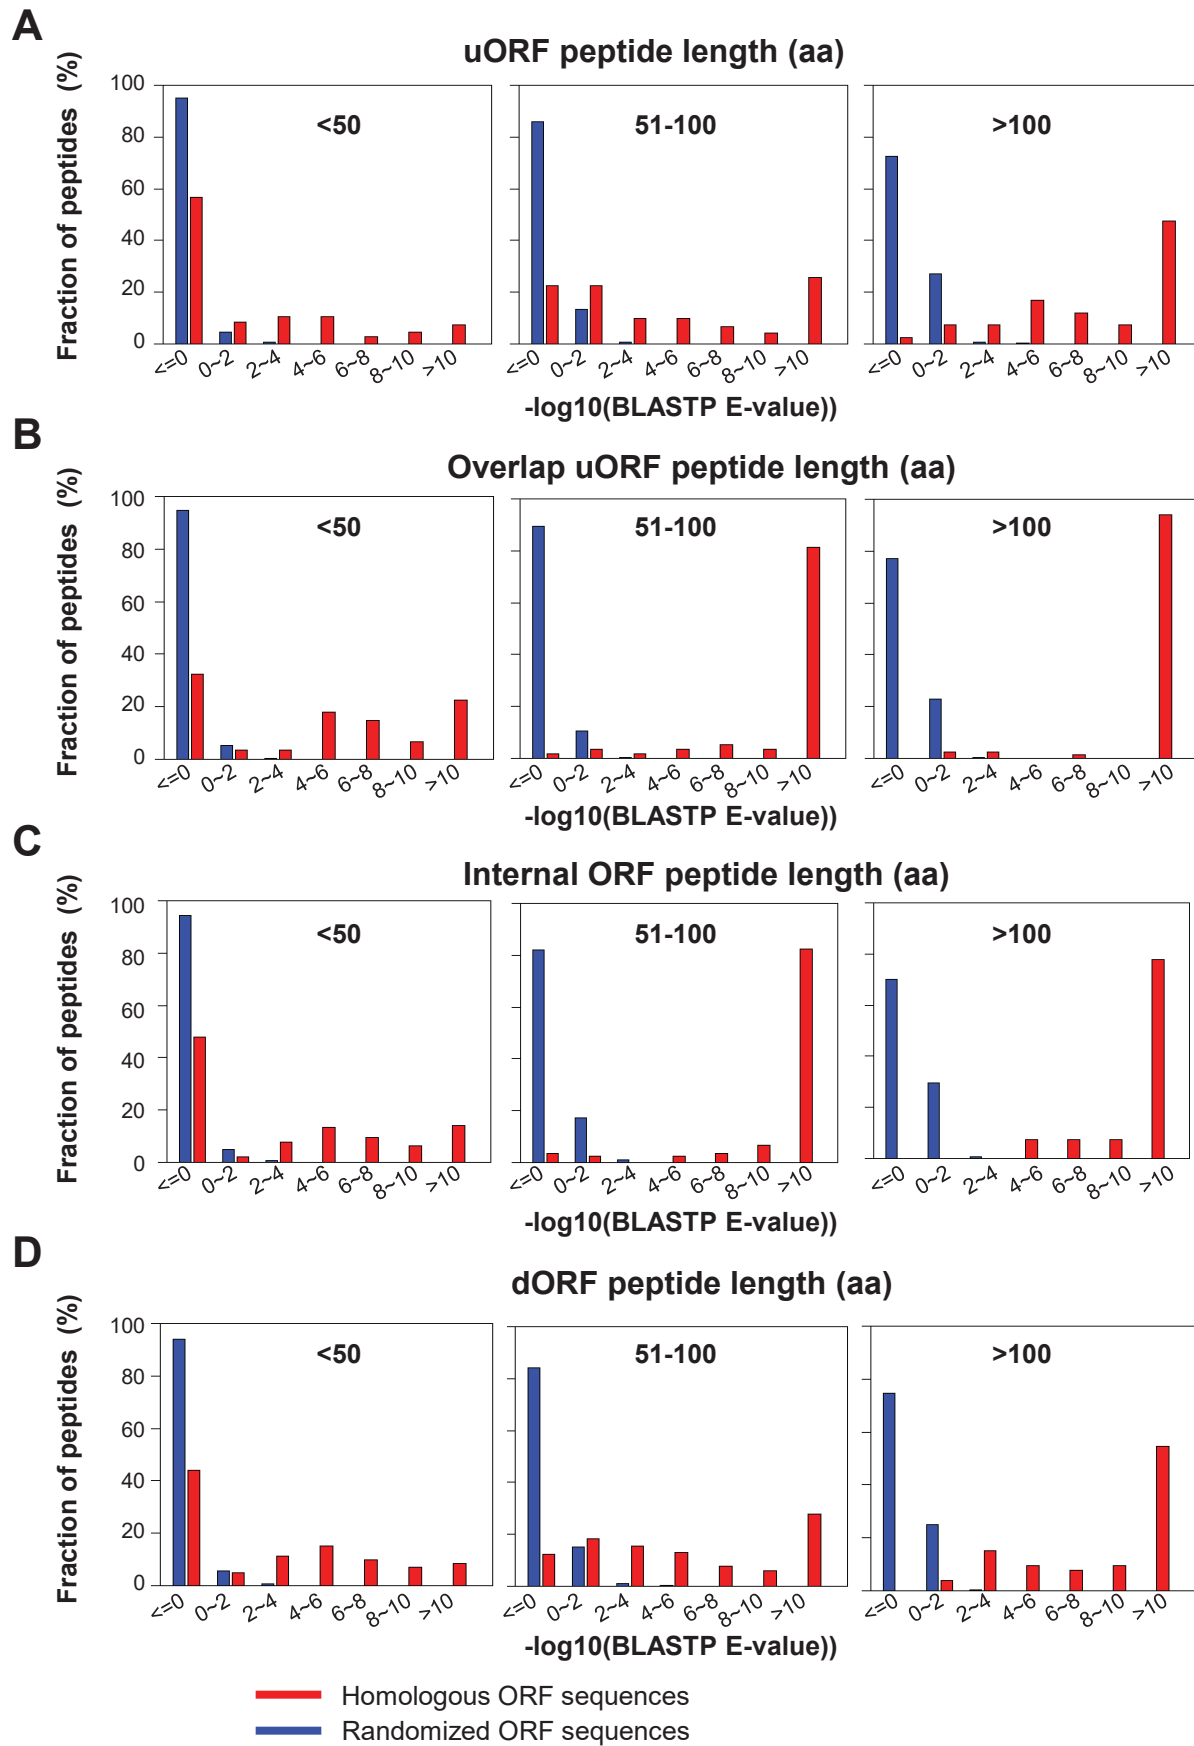

Supplement: supp [file elife-08890-supp-v1.zip › elife_poa_e08890_Figure_4_figure_supplement_5.pdf]

# Figure 4-figure supplement 2

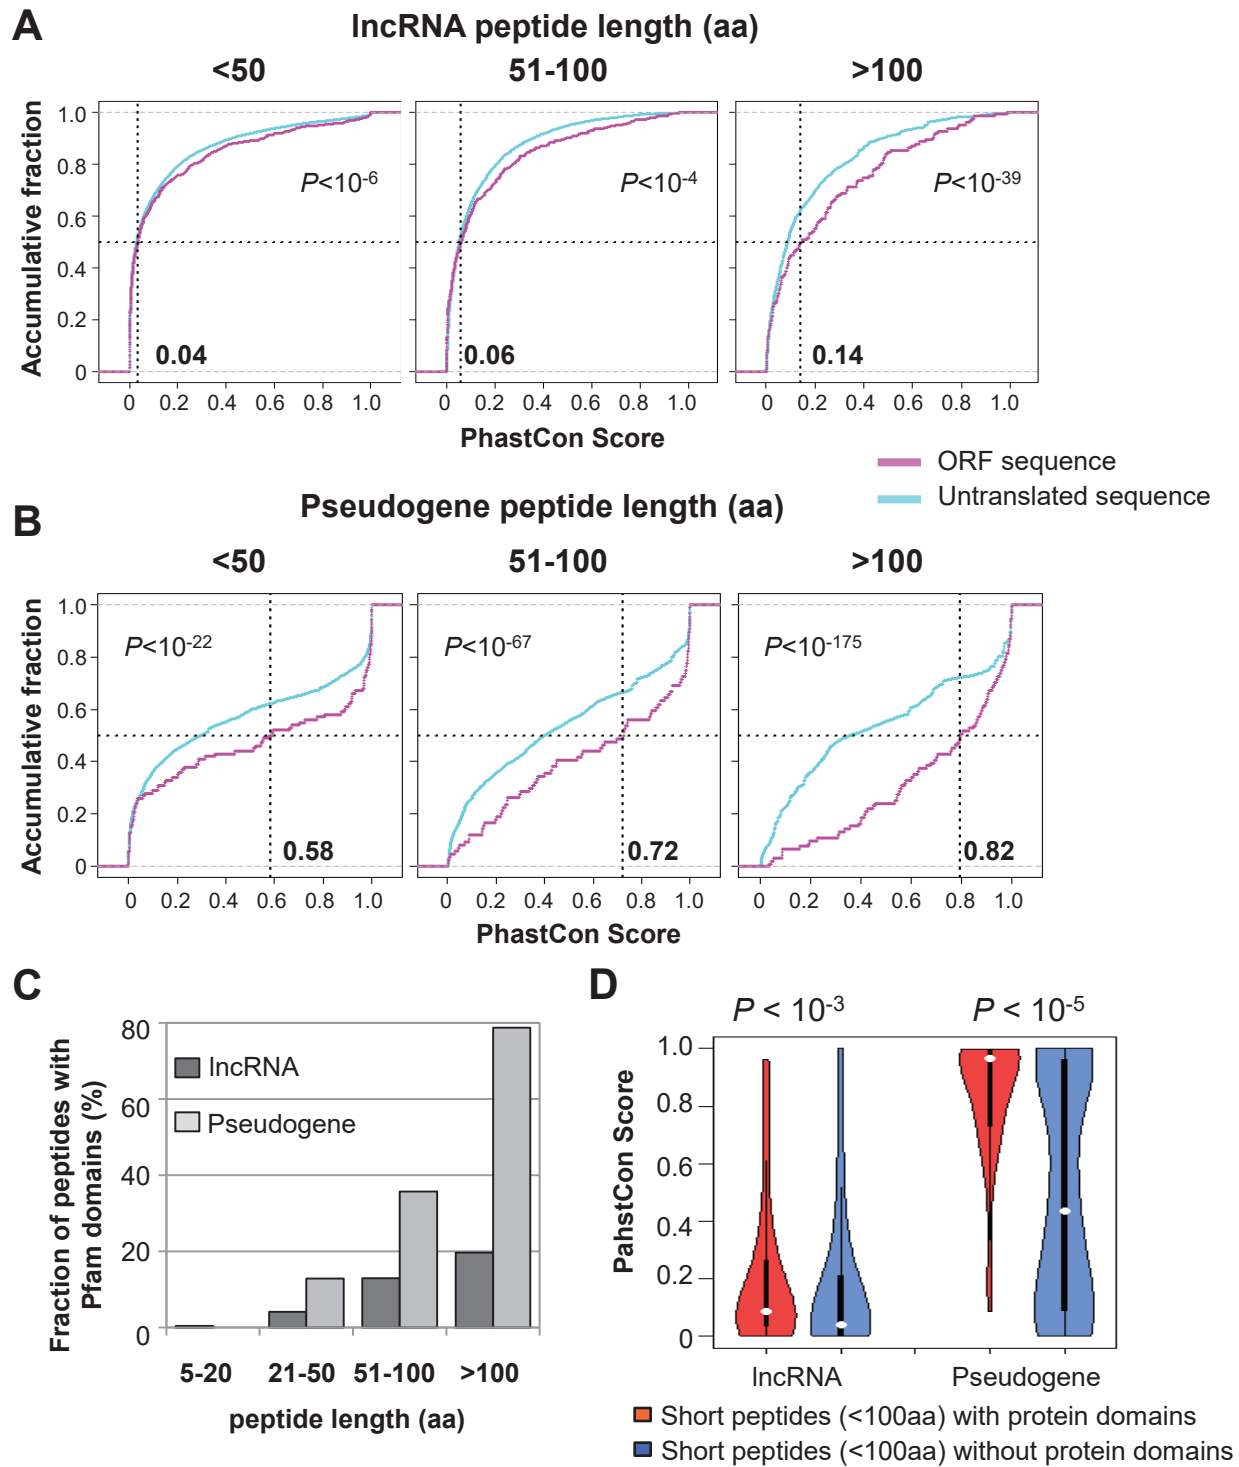

Supplement: supp [file elife-08890-supp-v1.zip › elife_poa_e08890_Figure_4_figure_supplement_2.pdf]

# Figure 3-figure supplement 1

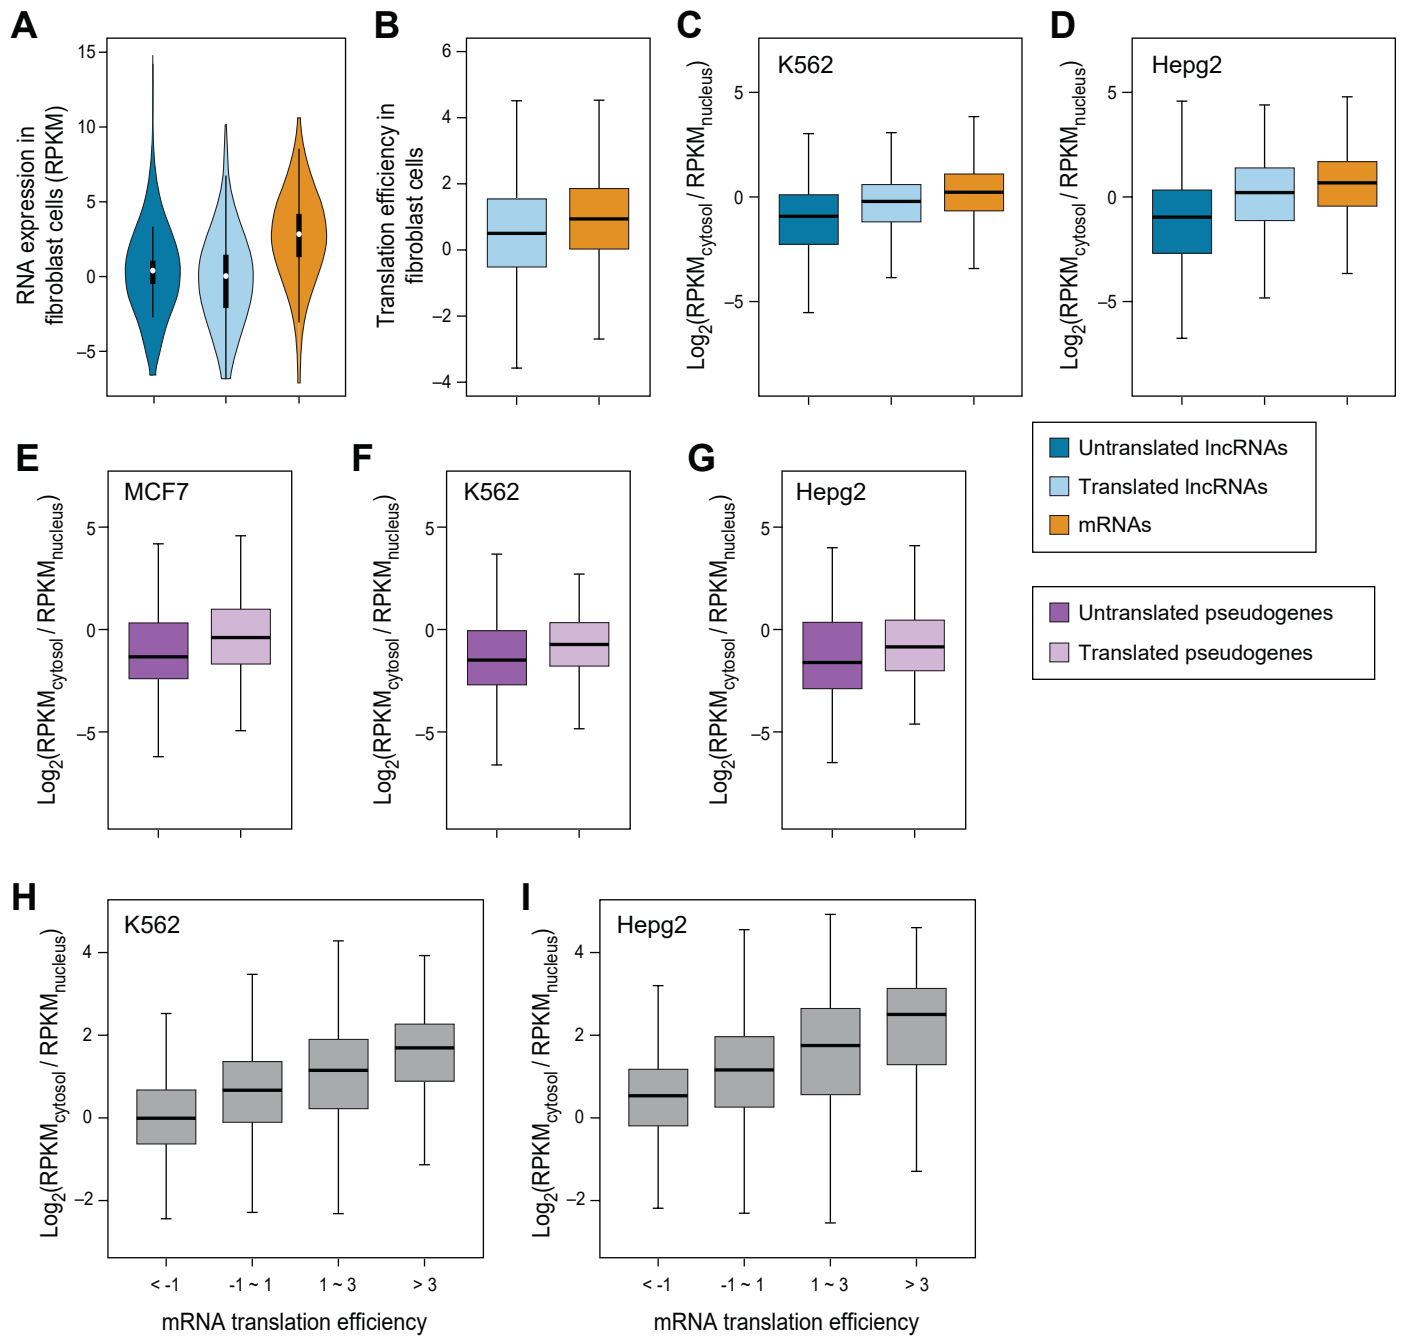

Supplement: supp [file elife-08890-supp-v1.zip › elife_poa_e08890_Figure_3_figure_supplement_1.pdf]

Figure 4-figure supplement 6

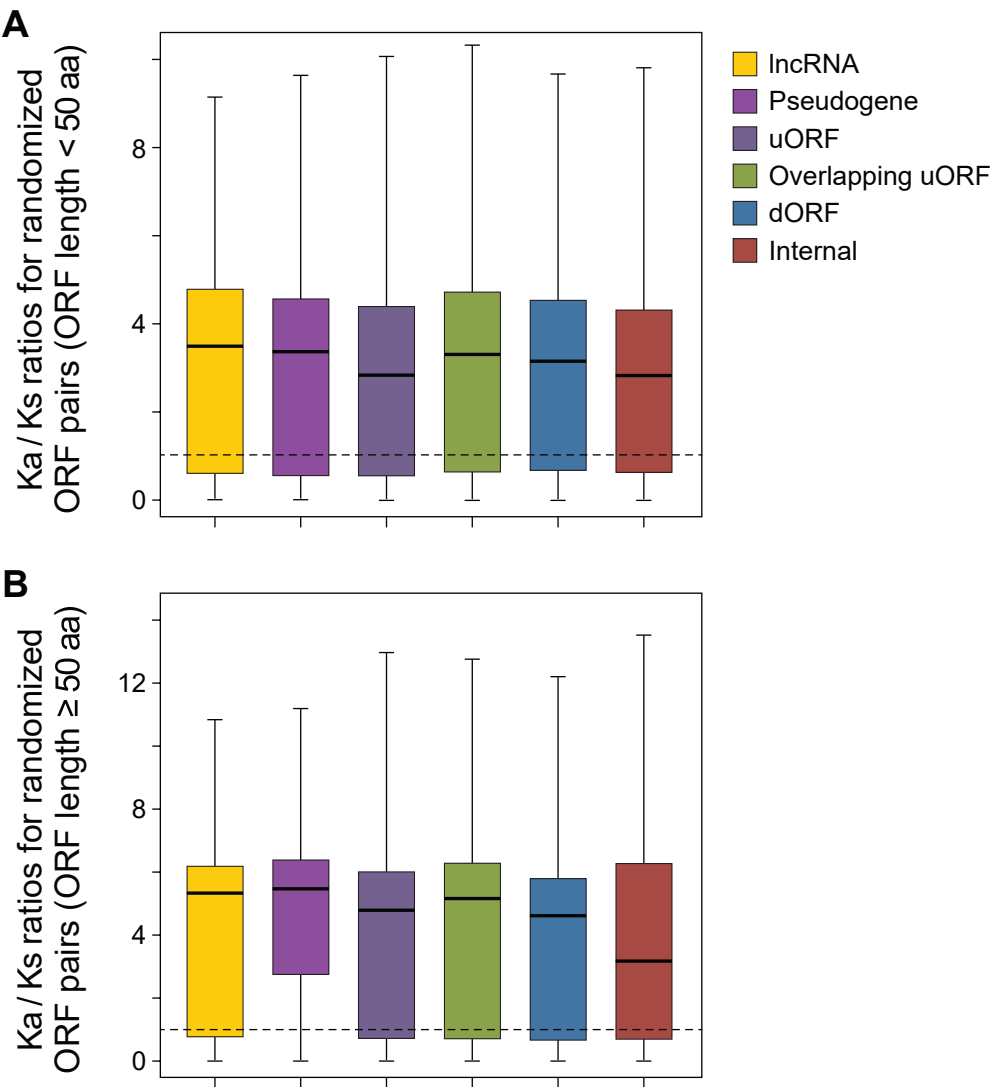

Supplement: supp [file elife-08890-supp-v1.zip › elife_poa_e08890_Figure_4_figure_supplement_6.pdf]

Figure 2-figure supplement 2

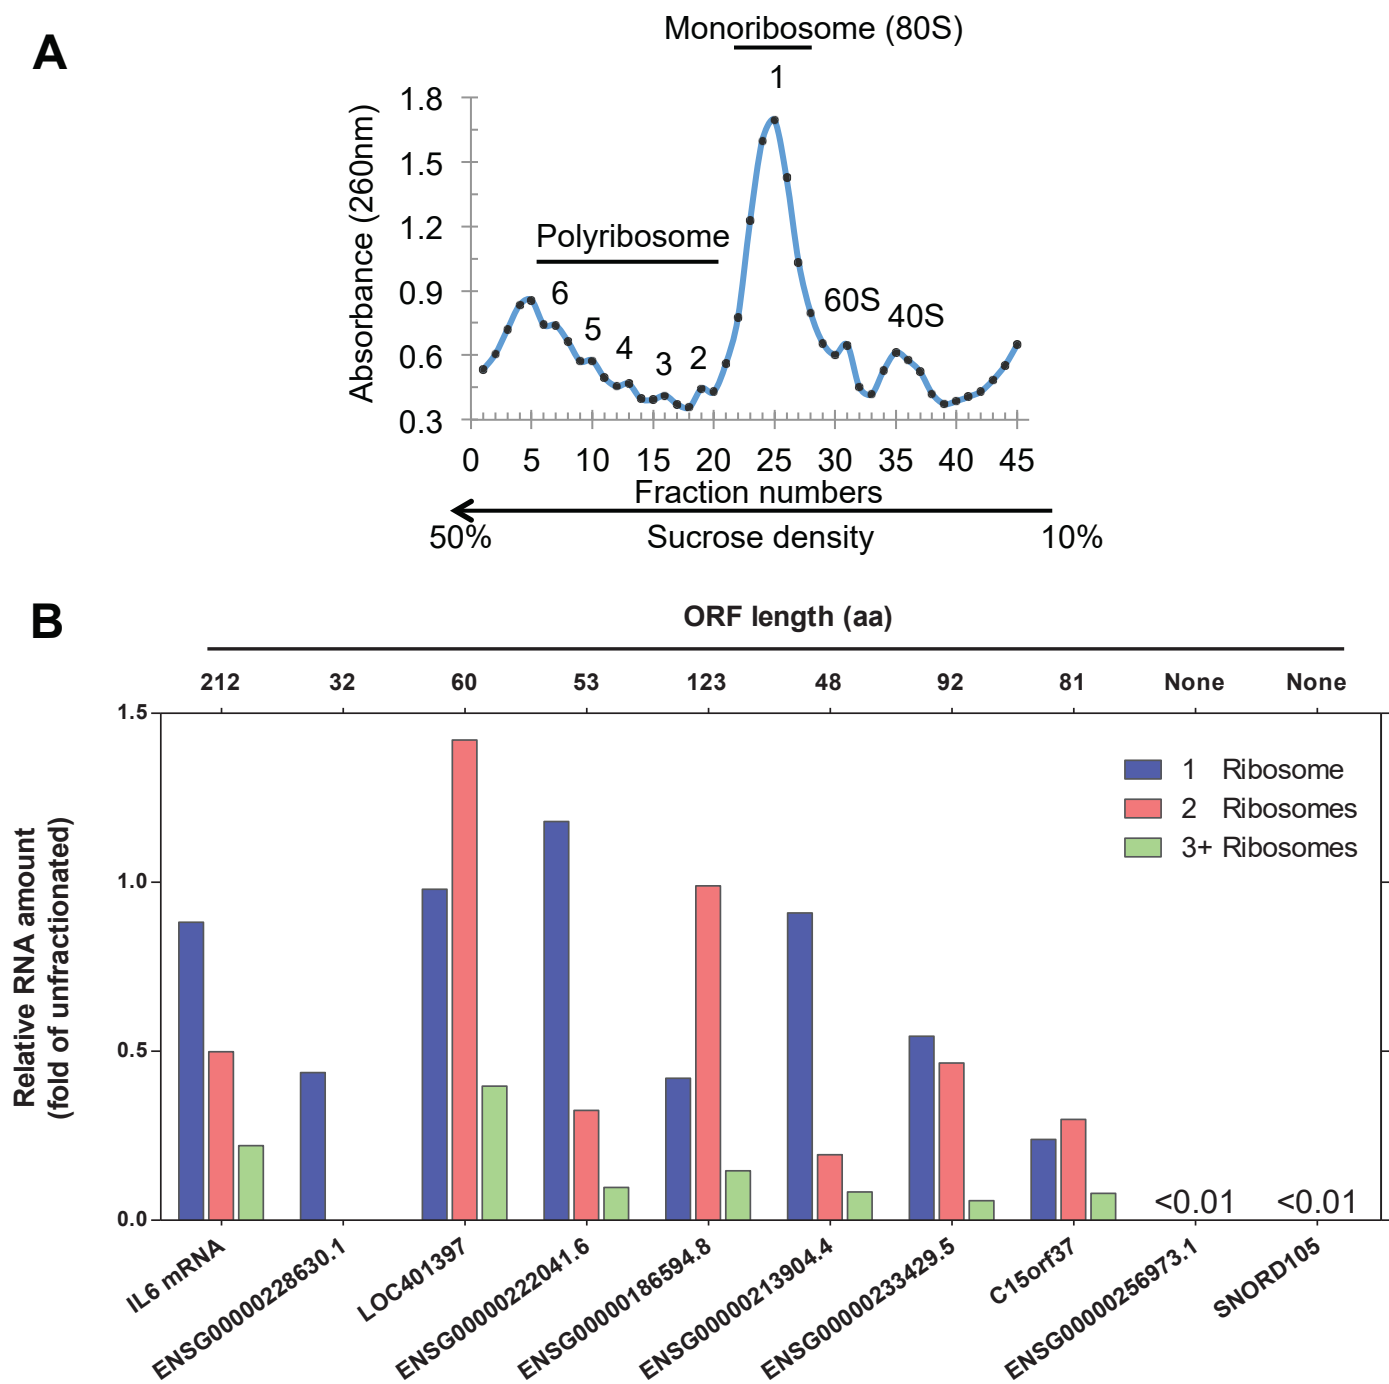

Supplement: supp [file elife-08890-supp-v1.zip › elife_poa_e08890_Figure_2_figure_supplement_2.pdf]

# Figure 2-figure supplement 1

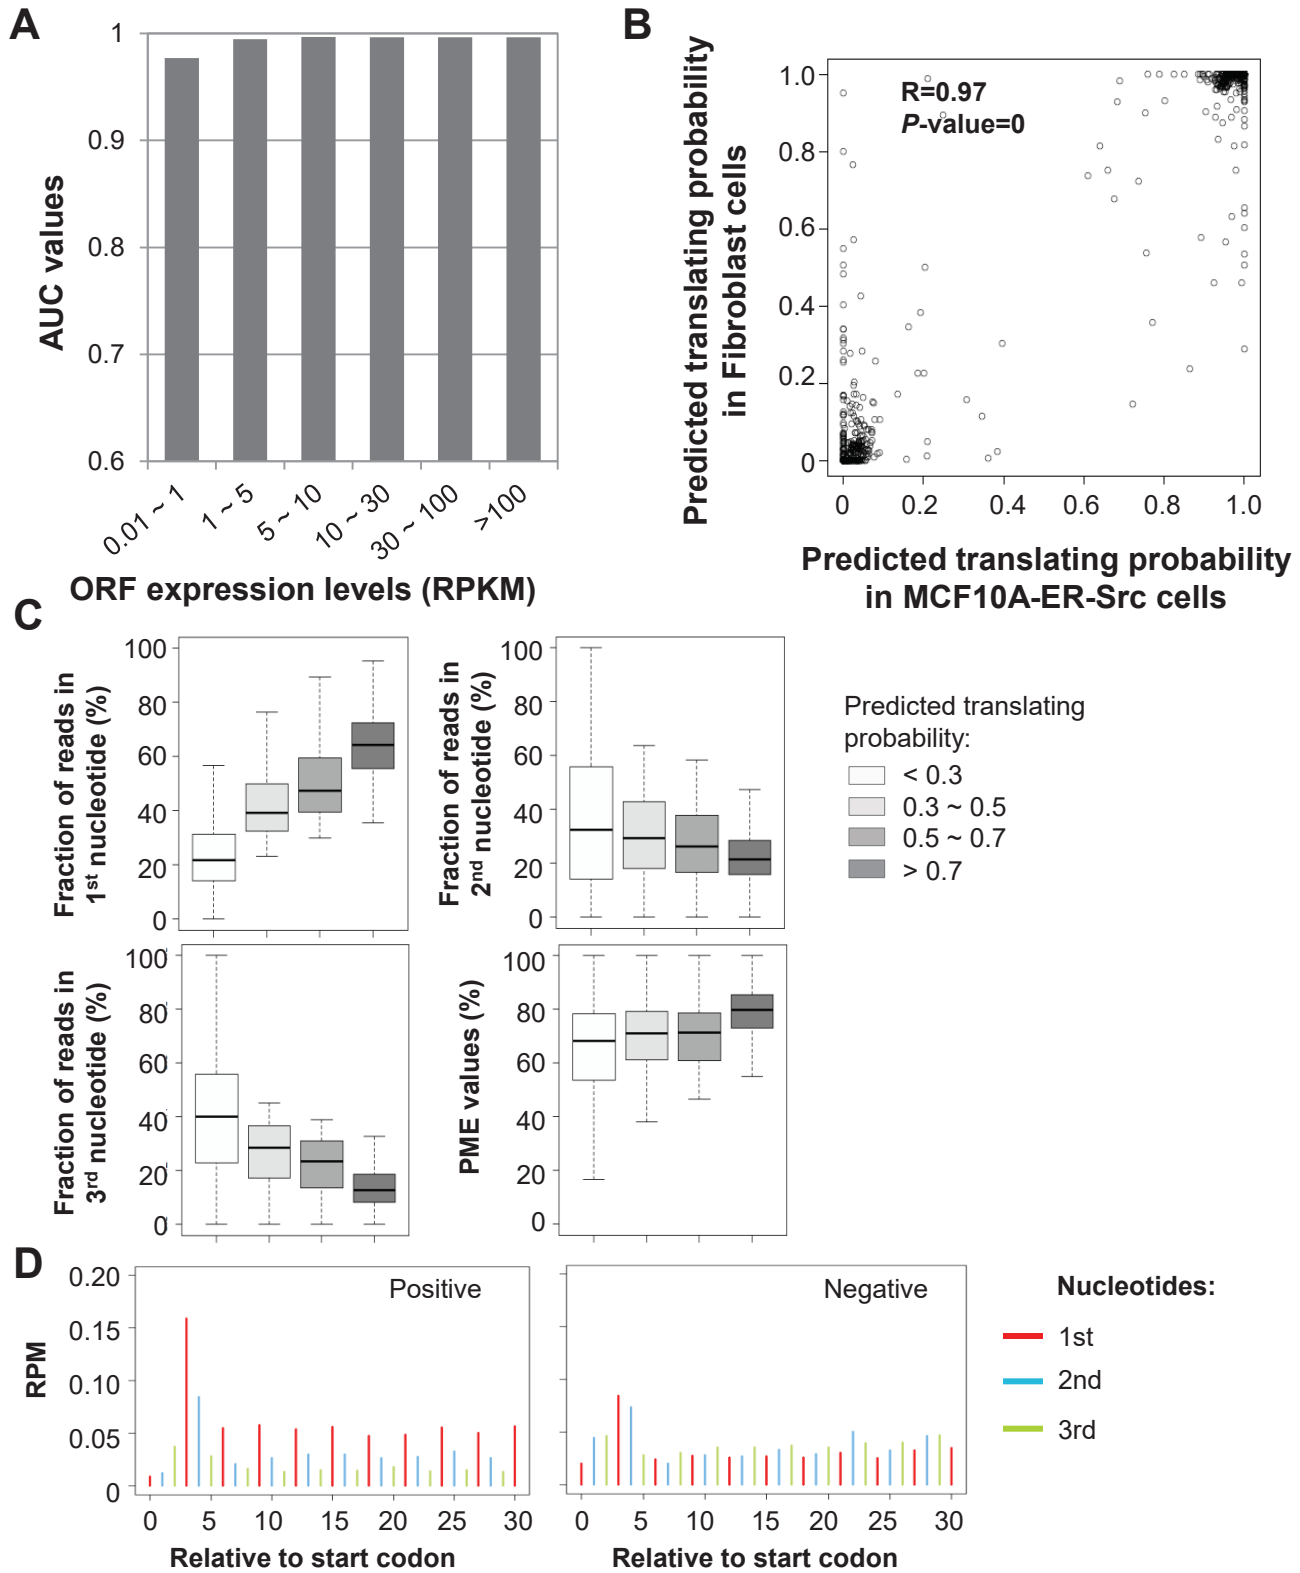

Supplement: supp [file elife-08890-supp-v1.zip › elife_poa_e08890_Figure_2_figure_supplement_1.pdf]

# Figure 4-figure supplement 3

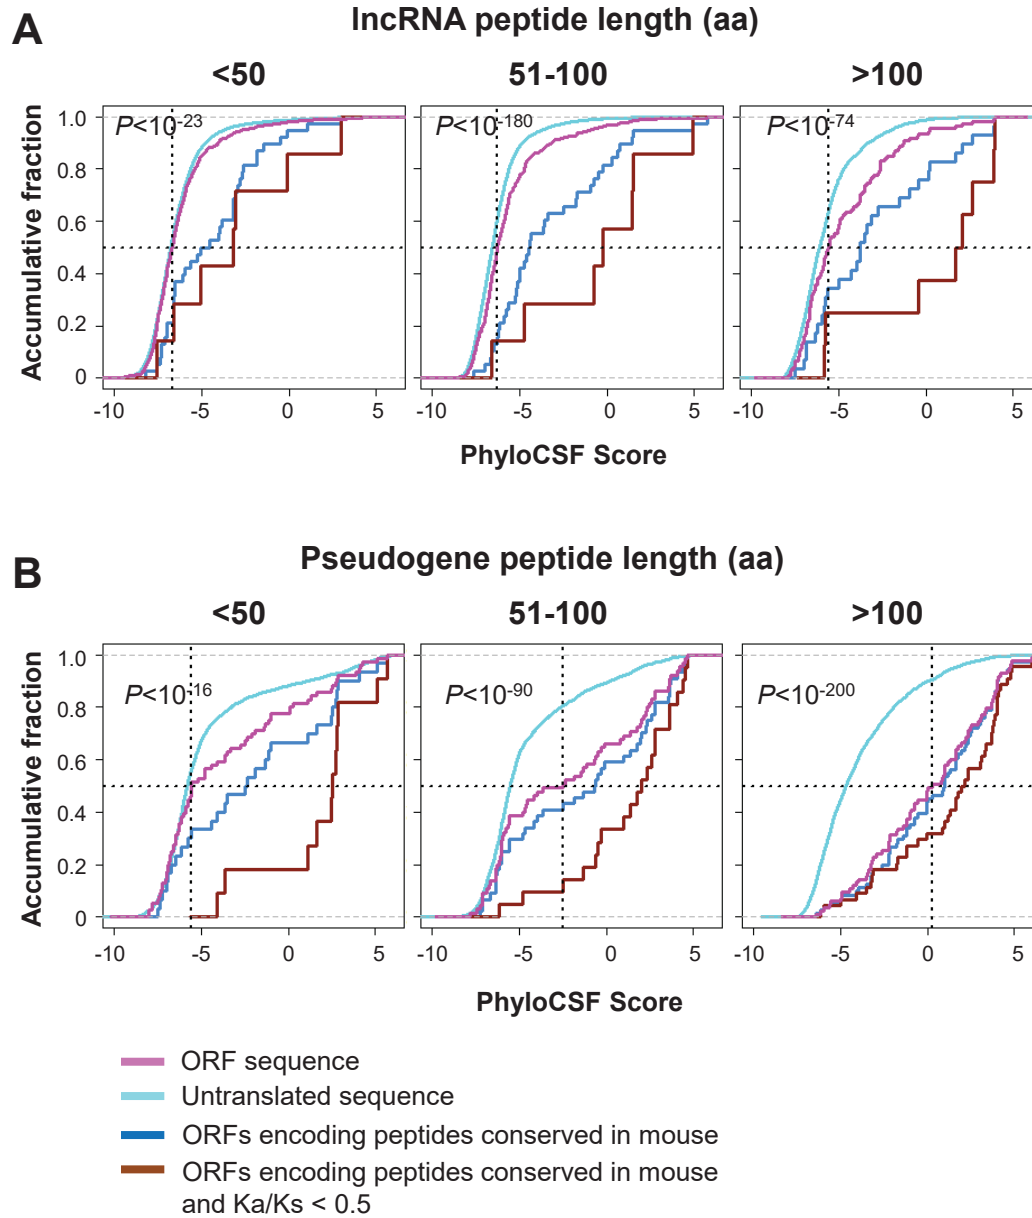

Supplement: supp [file elife-08890-supp-v1.zip › elife_poa_e08890_Figure_4_figure_supplement_3.pdf]

# Figure 4-figure supplement 4

**A**

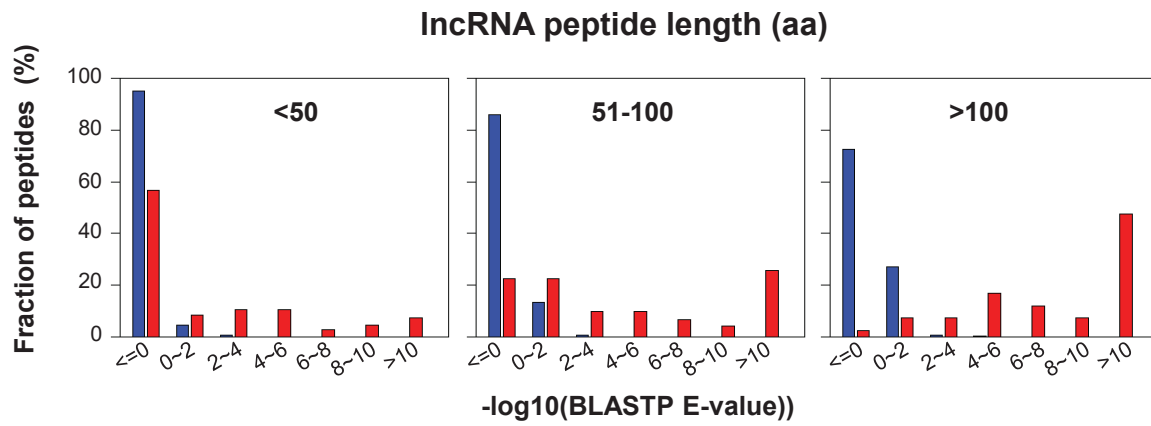

**B**

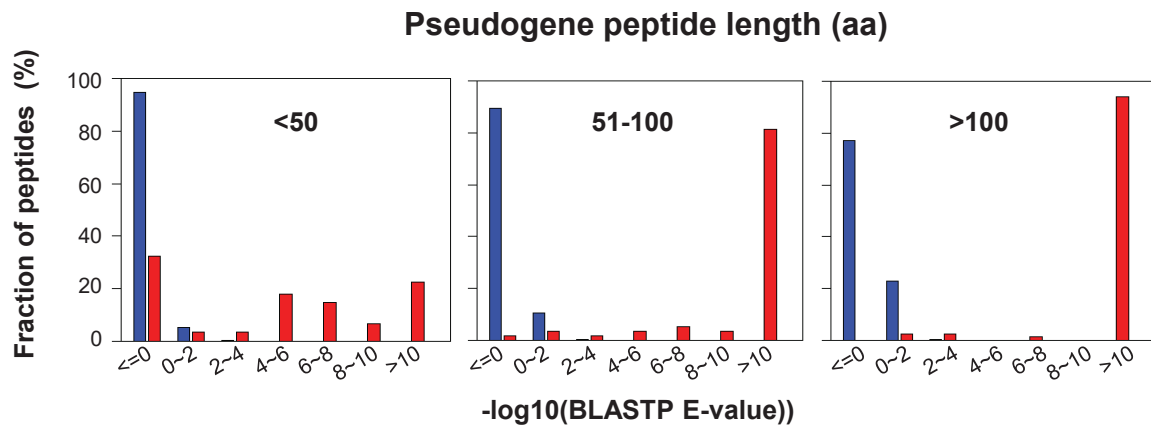

Homologous ORF sequence  
Randomized ORF sequence

Supplement: supp [file elife-08890-supp-v1.zip › elife_poa_e08890_Figure_4_figure_supplement_4.pdf]
